# Supplementary material
Source: publisher site journal article supplement (https://www.dovepress.com/article/321669)
Supplement: Supplementary file 1 [file get_supplementary_file.php]

Table S1: Variant numbers of the top 20 high mutation frequency genes in HCC

| Hugo_Symbol | Variant Numbers | Mutated Samples |
|-------------|-----------------|-----------------|
| TP53        | 105             | 103             |
| TTN         | 112             | 91              |
| CTNNB1      | 89              | 87              |
| MUC16       | 72              | 59              |
| ALB         | 43              | 40              |
| PCLO        | 49              | 39              |
| RYR2        | 39              | 35              |
| MUC4        | 37              | 35              |
| ABCA13      | 38              | 34              |
| APOB        | 36              | 34              |
| FLG         | 32              | 29              |
| OBSCN       | 32              | 29              |
| CSMD3       | 31              | 29              |
| LRP1B       | 29              | 29              |
| AXIN1       | 32              | 28              |
| XIRP2       | 28              | 28              |
| HMCN1       | 29              | 26              |
| ARID1A      | 26              | 26              |
| CACNA1E     | 27              | 25              |
| SPTA1       | 28              | 24              |

Table S2: Differentially expressed genes in TP53 Wild type and Mutant HCC

| GeneID          | log2FoldChange | padj        |
|-----------------|----------------|-------------|
| ENSG00000001626 | -1.600841741   | 0.000118333 |
| ENSG00000003137 | 1.352212568    | 0.00000263  |
| ENSG00000004846 | 1.834887883    | 0.0000131   |
| ENSG00000004939 | -1.59388146    | 0.000000104 |
| ENSG00000004948 | 2.120661001    | 2.97E-13    |
| ENSG00000005073 | 1.735156994    | 0.0000673   |
| ENSG00000006659 | 5.49920536     | 1.26E-11    |
| ENSG00000007306 | -2.412663334   | 0.002233815 |
| ENSG00000007350 | 3.429095527    | 4.39E-28    |
| ENSG00000007908 | -1.203370641   | 0.0000012   |
| ENSG00000007968 | 1.089103436    | 1.19E-12    |
| ENSG00000008196 | 1.981350621    | 0.002198326 |
| ENSG00000010379 | -1.211542852   | 2.54E-08    |
| ENSG00000011332 | 1.122841743    | 1.61E-08    |
| ENSG00000011465 | -1.03291846    | 0.000175091 |
| ENSG00000011677 | 2.336411484    | 0.0000126   |
| ENSG00000016490 | 3.572461392    | 0.004920447 |
| ENSG00000018236 | -1.287780406   | 0.01312843  |
| ENSG00000019186 | 1.422539118    | 0.007446462 |
| ENSG00000022556 | 1.510655118    | 0.0000012   |
| ENSG00000024526 | 1.015232697    | 5.54E-09    |
| ENSG00000026103 | -1.026404035   | 2.41E-13    |
| ENSG00000039537 | -1.017844496   | 0.00000103  |
| ENSG00000040731 | 2.408819149    | 0.000146077 |
| ENSG00000042832 | -1.320556199   | 0.000000708 |
| ENSG00000046774 | 1.268328239    | 0.033400168 |
| ENSG00000048462 | 1.036370467    | 0.003129222 |
| ENSG00000050767 | -1.129830128   | 0.000000267 |
| ENSG00000051341 | 1.141347331    | 5.87E-14    |
| ENSG00000054356 | 1.136378405    | 0.00000606  |
| ENSG00000054803 | -2.170236184   | 3.84E-09    |
| ENSG00000057149 | 1.859285723    | 0.009905053 |
| ENSG00000058404 | -1.506206006   | 0.000000303 |
| ENSG00000060718 | 1.519696       | 0.0000568   |
| ENSG00000064205 | -1.312803981   | 0.00000552  |
| ENSG00000065154 | -1.254993079   | 0.00000452  |
| ENSG00000065328 | 1.160090907    | 8.69E-13    |
| ENSG00000065371 | 1.01299614     | 0.011246653 |
| ENSG00000066032 | -1.703309734   | 0.000541632 |
| ENSG00000066230 | -1.0105015     | 0.001869332 |
| ENSG00000066405 | 1.073182115    | 0.000543076 |
| ENSG00000068985 | 3.379697976    | 9.74E-08    |
| ENSG00000069188 | -1.349960764   | 0.0000143   |
| ENSG00000069482 | -2.212246875   | 0.00000044  |
| ENSG00000070087 | 1.186967666    | 1.49E-08    |
| ENSG00000070193 | 1.01485589     | 0.030768355 |
| ENSG00000071539 | 1.271915116    | 8.29E-17    |
| ENSG00000072041 | 2.246766302    | 0.001604348 |
| ENSG00000074803 | -1.99060383    | 0.00000388  |
| ENSG00000075043 | -1.155569368   | 0.002871854 |
| ENSG00000075218 | 1.031691561    | 4.6E-10     |
| ENSG00000075388 | 1.662486398    | 0.041839651 |
| ENSG00000075891 | -1.264925195   | 0.004084217 |
| ENSG00000076344 | -1.01681269    | 0.00000421  |
| ENSG00000077009 | -1.095346061   | 0.024497625 |
| ENSG00000077274 | 1.398336204    | 0.001294482 |

|                 |              |             |
|-----------------|--------------|-------------|
| ENSG00000077327 | 2.311806885  | 7.02E-14    |
| ENSG00000077522 | -1.288043815 | 0.00022588  |
| ENSG00000077935 | 1.264633817  | 0.00000794  |
| ENSG00000078328 | 1.574834273  | 0.000108708 |
| ENSG00000079393 | 2.468180045  | 7.37E-13    |
| ENSG00000080709 | -1.082022215 | 0.0000801   |
| ENSG00000082482 | 1.446234654  | 0.004233981 |
| ENSG00000083067 | -1.121457628 | 0.0000567   |
| ENSG00000085999 | 1.224013795  | 6.9E-13     |
| ENSG00000086159 | -2.217532564 | 3.03E-09    |
| ENSG00000088340 | 1.001258438  | 0.000179576 |
| ENSG00000088538 | 1.211307512  | 9.22E-13    |
| ENSG00000089356 | 1.28266949   | 0.000202948 |
| ENSG00000090889 | 1.108694118  | 4.04E-12    |
| ENSG00000091622 | -1.084201027 | 0.00000301  |
| ENSG00000091704 | 3.186086504  | 7.98E-14    |
| ENSG00000091831 | -1.305389222 | 0.000000181 |
| ENSG00000092009 | -1.366316027 | 0.0000285   |
| ENSG00000092096 | -1.116313    | 0.0000506   |
| ENSG00000092853 | 1.189583366  | 9.5E-12     |
| ENSG00000095627 | 1.20741144   | 0.004257206 |
| ENSG00000095713 | -1.826755825 | 1.58E-08    |
| ENSG00000095752 | 1.202460648  | 0.00000392  |
| ENSG00000095777 | -1.519631961 | 0.017110643 |
| ENSG00000099399 | 2.127143334  | 0.003331155 |
| ENSG00000099869 | -1.002188646 | 0.039418128 |
| ENSG00000099957 | 1.37854548   | 6.28E-08    |
| ENSG00000099960 | -1.284718995 | 0.000255562 |
| ENSG00000100095 | 1.055863245  | 0.000462862 |
| ENSG00000100162 | 1.027372232  | 1.15E-09    |
| ENSG00000100336 | 1.035129546  | 9.02E-10    |
| ENSG00000100341 | -1.541924457 | 0.000413102 |
| ENSG00000100346 | -1.558072341 | 0.00000758  |
| ENSG00000100399 | -1.0642035   | 4.43E-08    |
| ENSG00000100448 | -1.416376606 | 0.0000044   |
| ENSG00000100593 | 1.452320265  | 0.006940178 |
| ENSG00000100604 | 2.35567637   | 1.39E-11    |
| ENSG00000100985 | 1.083317419  | 0.0000239   |
| ENSG00000101057 | 1.469968803  | 1.54E-13    |
| ENSG00000101197 | 1.58210159   | 2.76E-08    |
| ENSG00000101349 | 1.691777736  | 0.001395272 |
| ENSG00000101463 | -1.235218911 | 0.000813979 |
| ENSG00000101951 | -1.973373596 | 0.000293646 |
| ENSG00000102109 | -1.039843178 | 0.021217088 |
| ENSG00000102174 | 1.090889648  | 0.000166701 |
| ENSG00000102195 | -2.246641718 | 0.003952755 |
| ENSG00000102239 | 1.13842232   | 0.004029262 |
| ENSG00000102466 | -1.290468442 | 0.00000211  |
| ENSG00000102683 | 1.077648384  | 0.002409052 |
| ENSG00000102794 | 1.437926473  | 0.004206536 |
| ENSG00000102924 | -1.003565908 | 0.00000882  |
| ENSG00000103310 | -1.571014163 | 0.026293314 |
| ENSG00000103375 | -1.023906637 | 0.005501757 |
| ENSG00000104313 | 1.627877546  | 0.0000211   |
| ENSG00000104321 | 2.491370785  | 8.47E-15    |
| ENSG00000104327 | 1.234925827  | 0.000000146 |
| ENSG00000104413 | -2.190863583 | 0.00000229  |
| ENSG00000104938 | -2.098394753 | 0.00000138  |

|                 |              |             |
|-----------------|--------------|-------------|
| ENSG00000104951 | 1.339917911  | 1.15E-10    |
| ENSG00000105011 | 1.049376853  | 4.1E-12     |
| ENSG00000105131 | -1.275459544 | 0.000000014 |
| ENSG00000105281 | 1.206922636  | 1.13E-10    |
| ENSG00000105697 | -1.878119696 | 0.000000106 |
| ENSG00000105889 | 1.574819406  | 3.78E-12    |
| ENSG00000105929 | 1.021964996  | 0.006331279 |
| ENSG00000106013 | 1.629300443  | 0.0000671   |
| ENSG00000106236 | 1.00520057   | 0.01446657  |
| ENSG00000106809 | -1.742595598 | 2.91E-08    |
| ENSG00000106976 | 1.101940837  | 0.000000581 |
| ENSG00000107014 | 1.005397469  | 0.001830478 |
| ENSG00000107165 | 1.050960818  | 0.016717087 |
| ENSG00000107831 | 1.038783045  | 0.015280557 |
| ENSG00000108231 | -1.266731712 | 0.000916189 |
| ENSG00000108387 | -1.002252144 | 0.00000309  |
| ENSG00000108602 | -1.962537397 | 0.00000105  |
| ENSG00000108684 | -1.242993454 | 0.0000305   |
| ENSG00000109063 | -1.276998685 | 3.29E-10    |
| ENSG00000109205 | -1.481777495 | 0.010859431 |
| ENSG00000109208 | -3.813664577 | 0.010479923 |
| ENSG00000109625 | -1.412825465 | 0.000607932 |
| ENSG00000109674 | 1.135446925  | 8.46E-10    |
| ENSG00000109758 | -2.288365552 | 3.55E-14    |
| ENSG00000109805 | 1.061368887  | 5.42E-12    |
| ENSG00000110169 | -1.057582587 | 2.47E-08    |
| ENSG00000110436 | -1.049797224 | 0.000224657 |
| ENSG00000110680 | -1.092762056 | 0.003180359 |
| ENSG00000111700 | -1.244846696 | 0.002128793 |
| ENSG00000111783 | 1.060342885  | 0.013183747 |
| ENSG00000111962 | -1.103912571 | 0.0000203   |
| ENSG00000111981 | 1.234137609  | 0.00000319  |
| ENSG00000112116 | 1.112242945  | 0.031333787 |
| ENSG00000112218 | 1.079202374  | 0.0000019   |
| ENSG00000112238 | 2.073954361  | 0.001636687 |
| ENSG00000112273 | 3.332518371  | 0.000000339 |
| ENSG00000112319 | 3.166297247  | 7.42E-14    |
| ENSG00000112541 | -1.181869047 | 1.53E-10    |
| ENSG00000112742 | 1.235658749  | 2.35E-14    |
| ENSG00000112818 | 1.164757457  | 0.008950063 |
| ENSG00000112837 | 1.709953229  | 2.11E-08    |
| ENSG00000112936 | -1.584306093 | 4.79E-08    |
| ENSG00000112981 | -1.400497854 | 0.000000161 |
| ENSG00000113763 | -1.190995309 | 0.000000613 |
| ENSG00000114204 | 2.068329922  | 2.59E-08    |
| ENSG00000114268 | 1.111784094  | 1.11E-12    |
| ENSG00000114455 | 1.261316674  | 0.003456417 |
| ENSG00000114638 | 1.01155843   | 0.027271537 |
| ENSG00000114923 | -1.133124474 | 0.000299064 |
| ENSG00000114948 | 1.598604669  | 1.36E-08    |
| ENSG00000115008 | 1.206715955  | 0.000000374 |
| ENSG00000115163 | 1.02495714   | 2.84E-09    |
| ENSG00000115194 | 1.286178887  | 0.0000163   |
| ENSG00000115221 | 1.114856677  | 0.0000851   |
| ENSG00000115297 | -1.007433089 | 0.016270784 |
| ENSG00000115380 | -1.002368113 | 0.000396179 |
| ENSG00000115474 | -1.051034395 | 0.015186364 |
| ENSG00000115602 | -1.925268355 | 1.41E-13    |

|                 |              |             |
|-----------------|--------------|-------------|
| ENSG00000116761 | -1.1134549   | 0.00000154  |
| ENSG00000117069 | 1.521371103  | 0.00000142  |
| ENSG00000117394 | 1.186275961  | 1.8E-09     |
| ENSG00000117399 | 1.302237518  | 1.5E-13     |
| ENSG00000117594 | -1.06107246  | 0.0004636   |
| ENSG00000117598 | 2.112450728  | 0.0079848   |
| ENSG00000118094 | -1.217133715 | 0.0000066   |
| ENSG00000118434 | -1.023073931 | 0.042828832 |
| ENSG00000118492 | 1.355356918  | 0.000966134 |
| ENSG00000118513 | 1.041826018  | 7.73E-08    |
| ENSG00000118972 | -1.386001865 | 0.035554359 |
| ENSG00000119121 | 1.209020317  | 0.0000156   |
| ENSG00000119147 | -1.128492617 | 0.00000347  |
| ENSG00000119457 | -1.216940518 | 0.00015272  |
| ENSG00000119915 | 1.442113384  | 0.000000712 |
| ENSG00000120149 | -1.100827933 | 0.002321783 |
| ENSG00000120210 | 1.787941934  | 0.001141346 |
| ENSG00000120251 | 1.779383744  | 0.00014217  |
| ENSG00000120669 | 2.379531005  | 0.000190082 |
| ENSG00000121316 | 1.343447723  | 7.75E-11    |
| ENSG00000121446 | -1.794999852 | 0.0000363   |
| ENSG00000122584 | 1.317910287  | 0.009572578 |
| ENSG00000123496 | 2.03308247   | 1.92E-15    |
| ENSG00000123560 | -1.591990487 | 0.003157926 |
| ENSG00000123838 | -1.18014014  | 7.86E-10    |
| ENSG00000124212 | -1.006148596 | 0.000183395 |
| ENSG00000124232 | 1.033453164  | 0.001172724 |
| ENSG00000124249 | -1.113512144 | 0.007030738 |
| ENSG00000124260 | 4.940289243  | 4.85E-17    |
| ENSG00000124302 | -2.457928252 | 1.41E-13    |
| ENSG00000124467 | -1.379360513 | 0.045844026 |
| ENSG00000124490 | 2.063341701  | 0.003455815 |
| ENSG00000124557 | 1.131933904  | 0.000650853 |
| ENSG00000124713 | -1.168756332 | 0.00000968  |
| ENSG00000124731 | 1.469992267  | 6.09E-09    |
| ENSG00000124780 | -1.289222468 | 8.64E-08    |
| ENSG00000124882 | 1.399424203  | 0.00080875  |
| ENSG00000125740 | -1.3461427   | 0.000000137 |
| ENSG00000125804 | 1.337681377  | 0.0000825   |
| ENSG00000125823 | 1.119763614  | 0.002883156 |
| ENSG00000125869 | 1.049769454  | 0.000554307 |
| ENSG00000126010 | -1.299874972 | 0.000226708 |
| ENSG00000126262 | 1.222002439  | 0.000000161 |
| ENSG00000126838 | -1.459070846 | 0.000000418 |
| ENSG00000126890 | 1.477722617  | 0.031335028 |
| ENSG00000126950 | 1.079382243  | 0.000124605 |
| ENSG00000127083 | -1.087245824 | 0.000783113 |
| ENSG00000127129 | -1.405997467 | 0.000000211 |
| ENSG00000127423 | 1.185144258  | 1.12E-20    |
| ENSG00000127530 | 2.094086073  | 0.005576514 |
| ENSG00000127928 | 1.596249253  | 0.004324826 |
| ENSG00000127954 | -1.418084946 | 3.13E-11    |
| ENSG00000128310 | -1.186174101 | 0.0000137   |
| ENSG00000128422 | 1.848959861  | 5.11E-11    |
| ENSG00000128655 | -1.307313357 | 3.62E-09    |
| ENSG00000128713 | 1.310961926  | 0.040179087 |
| ENSG00000129195 | 1.039778003  | 0.0000051   |
| ENSG00000129451 | -1.057930567 | 0.005458004 |

|                 |              |             |
|-----------------|--------------|-------------|
| ENSG00000129965 | -3.821581327 | 1.14E-11    |
| ENSG00000130234 | -1.338742229 | 0.000136026 |
| ENSG00000130294 | -2.174772249 | 4.77E-10    |
| ENSG00000130540 | -2.497936047 | 3.85E-08    |
| ENSG00000130649 | -1.562176245 | 0.00000193  |
| ENSG00000130675 | -1.153908423 | 0.044715893 |
| ENSG00000130700 | -2.154856438 | 0.0000014   |
| ENSG00000130701 | -1.500250299 | 0.004079214 |
| ENSG00000130720 | 1.177097659  | 0.00245466  |
| ENSG00000130876 | 1.428156273  | 0.00119437  |
| ENSG00000131050 | 1.292056222  | 0.009752158 |
| ENSG00000131080 | -2.400930854 | 1.74E-35    |
| ENSG00000131737 | 1.588269509  | 0.013629472 |
| ENSG00000131771 | 1.671912997  | 0.00000457  |
| ENSG00000132274 | -1.079220402 | 9.21E-12    |
| ENSG00000132429 | 1.933386323  | 0.000183558 |
| ENSG00000132446 | 3.220973609  | 0.000303112 |
| ENSG00000132677 | -1.197594152 | 0.001638916 |
| ENSG00000132698 | -1.553609316 | 0.000103734 |
| ENSG00000132874 | -2.024634905 | 2.94E-09    |
| ENSG00000132938 | -1.196547641 | 0.000927481 |
| ENSG00000132972 | 1.700967116  | 0.005464149 |
| ENSG00000133048 | -1.117783741 | 0.000843627 |
| ENSG00000133067 | -1.127617053 | 0.0000929   |
| ENSG00000133636 | -1.643453886 | 0.001771974 |
| ENSG00000133640 | 1.579559871  | 0.000445415 |
| ENSG00000133878 | 1.286261652  | 0.000000353 |
| ENSG00000134184 | -1.451278726 | 0.000493708 |
| ENSG00000134201 | -1.365114512 | 0.000000486 |
| ENSG00000134249 | 1.334198193  | 0.0023992   |
| ENSG00000134339 | -1.769696536 | 0.00000094  |
| ENSG00000134365 | -1.461698817 | 4.71E-09    |
| ENSG00000134389 | -1.083733096 | 0.000085    |
| ENSG00000134640 | 1.728068458  | 0.019842559 |
| ENSG00000134690 | 1.050034924  | 7.42E-14    |
| ENSG00000134762 | 1.088584484  | 0.004814174 |
| ENSG00000134775 | 1.247289829  | 0.0000442   |
| ENSG00000135314 | 1.259666186  | 0.00000421  |
| ENSG00000135549 | 1.156803377  | 0.00000374  |
| ENSG00000135702 | 1.252968267  | 0.010770314 |
| ENSG00000135821 | -1.062886444 | 0.0000486   |
| ENSG00000135824 | 1.129710565  | 0.000691522 |
| ENSG00000135914 | -2.372733406 | 4.27E-22    |
| ENSG00000136011 | -1.730906324 | 5.07E-12    |
| ENSG00000136231 | 1.02476293   | 0.00217879  |
| ENSG00000136542 | 1.124975186  | 0.00064416  |
| ENSG00000136929 | -1.246545744 | 0.001021418 |
| ENSG00000136943 | 1.062933576  | 0.000203442 |
| ENSG00000136944 | -1.218233809 | 0.008950549 |
| ENSG00000137077 | -1.367239898 | 0.00000377  |
| ENSG00000137251 | 1.117094744  | 0.037053833 |
| ENSG00000137261 | 1.191529879  | 3.5E-10     |
| ENSG00000137392 | 4.387238562  | 0.00000182  |
| ENSG00000137473 | 1.606652532  | 0.001441174 |
| ENSG00000137674 | 1.021677665  | 0.045028281 |
| ENSG00000137731 | -1.5203477   | 0.000107316 |
| ENSG00000137745 | 1.40245353   | 0.010254244 |
| ENSG00000137757 | 1.145431305  | 8.32E-08    |

|                 |              |             |
|-----------------|--------------|-------------|
| ENSG00000137948 | 5.162761384  | 6.54E-33    |
| ENSG00000138068 | 1.178539763  | 0.008348856 |
| ENSG00000138083 | 1.59997767   | 0.006299031 |
| ENSG00000138100 | 1.027256471  | 0.004039129 |
| ENSG00000138109 | -1.095399802 | 0.00000388  |
| ENSG00000138180 | 1.220770621  | 1.16E-13    |
| ENSG00000138435 | 1.115393049  | 0.00017856  |
| ENSG00000138587 | 1.076377075  | 0.00000912  |
| ENSG00000138741 | 2.219343126  | 2.82E-11    |
| ENSG00000138798 | 1.352444375  | 0.002201428 |
| ENSG00000139220 | 1.00416185   | 0.0000026   |
| ENSG00000139445 | 1.484341924  | 0.00000542  |
| ENSG00000139515 | -1.401353407 | 0.003010767 |
| ENSG00000139572 | 1.469237546  | 1.84E-09    |
| ENSG00000140015 | 1.526799355  | 0.017249805 |
| ENSG00000140107 | -1.277930086 | 0.0000696   |
| ENSG00000140279 | -1.274493376 | 0.00164391  |
| ENSG00000140465 | -2.378487713 | 2.97E-10    |
| ENSG00000140505 | -2.088374926 | 0.000000879 |
| ENSG00000140600 | -1.968374119 | 0.003790452 |
| ENSG00000140798 | 1.043998659  | 0.021212098 |
| ENSG00000141485 | -1.26223455  | 0.000000035 |
| ENSG00000141527 | 1.061996895  | 0.00000011  |
| ENSG00000142623 | -1.804593066 | 0.0000423   |
| ENSG00000142748 | -1.564841593 | 1.11E-09    |
| ENSG00000142945 | 1.197501204  | 2.41E-13    |
| ENSG00000143006 | 1.586633591  | 0.031237148 |
| ENSG00000143125 | -1.662890701 | 0.00000323  |
| ENSG00000143171 | -1.409774596 | 0.0000455   |
| ENSG00000143194 | 1.296476447  | 0.0000359   |
| ENSG00000143546 | 1.072876915  | 0.00000196  |
| ENSG00000143816 | -1.131050968 | 0.000131726 |
| ENSG00000143839 | -1.363741164 | 0.00000185  |
| ENSG00000143847 | 1.403907931  | 8.38E-08    |
| ENSG00000143867 | -1.052684504 | 0.0000365   |
| ENSG00000143869 | -1.016395811 | 1.87E-08    |
| ENSG00000143954 | 2.041183104  | 0.028689722 |
| ENSG00000144057 | -1.25543654  | 0.0000179   |
| ENSG00000144644 | -1.545443169 | 0.000725816 |
| ENSG00000144681 | 1.553990778  | 0.000000181 |
| ENSG00000144834 | 1.133978104  | 0.002587882 |
| ENSG00000144847 | 1.923610706  | 9.1E-09     |
| ENSG00000145087 | 1.272441644  | 0.006982053 |
| ENSG00000145107 | 2.280343253  | 1.03E-19    |
| ENSG00000145242 | 1.56802882   | 0.018352248 |
| ENSG00000145244 | -1.132674393 | 0.00000892  |
| ENSG00000145384 | -1.138788695 | 0.032896728 |
| ENSG00000145451 | 1.627001013  | 0.00000462  |
| ENSG00000145526 | 2.447763841  | 0.0000597   |
| ENSG00000145681 | 1.277638065  | 0.000872242 |
| ENSG00000145708 | -1.885673593 | 1.05E-11    |
| ENSG00000145824 | -1.60317862  | 0.00000188  |
| ENSG00000146013 | -1.807118139 | 0.00000321  |
| ENSG00000146038 | -1.076574191 | 0.000196545 |
| ENSG00000146049 | -1.322108223 | 0.00000171  |
| ENSG00000146276 | 1.019588531  | 0.015833827 |
| ENSG00000146352 | 1.582123675  | 0.022294319 |
| ENSG00000146374 | -1.027265876 | 0.001224867 |

|                 |              |             |
|-----------------|--------------|-------------|
| ENSG00000146410 | 1.105595677  | 2.74E-14    |
| ENSG00000146530 | 1.185534851  | 0.008964423 |
| ENSG00000147160 | -1.175144296 | 0.025228634 |
| ENSG00000147223 | -1.29602148  | 0.000000173 |
| ENSG00000147246 | 2.927067823  | 0.00000121  |
| ENSG00000147256 | -3.615647702 | 0.000128573 |
| ENSG00000147381 | 6.323124748  | 1.76E-23    |
| ENSG00000147432 | 1.256010459  | 0.019645619 |
| ENSG00000147481 | -1.003065185 | 0.021838245 |
| ENSG00000147536 | 1.022639649  | 2.43E-11    |
| ENSG00000147650 | 1.027557917  | 3.57E-09    |
| ENSG00000147655 | -2.583711923 | 1.99E-09    |
| ENSG00000147697 | 1.240474671  | 0.000000722 |
| ENSG00000147889 | 1.111400918  | 2.76E-09    |
| ENSG00000148346 | -1.093285578 | 0.001986689 |
| ENSG00000148513 | 1.451807566  | 0.000568776 |
| ENSG00000148704 | 1.884432613  | 0.002625909 |
| ENSG00000148735 | 2.067733779  | 3.67E-10    |
| ENSG00000148826 | -1.324930837 | 0.001371214 |
| ENSG00000149054 | 1.23450286   | 0.000000551 |
| ENSG00000149506 | 1.412795366  | 0.000000251 |
| ENSG00000149599 | 1.084123355  | 0.0000244   |
| ENSG00000149654 | -2.455585796 | 0.00000203  |
| ENSG00000149948 | 1.496469945  | 0.001526455 |
| ENSG00000149972 | 1.664872765  | 0.0000112   |
| ENSG00000150337 | 1.153554923  | 8.82E-09    |
| ENSG00000150556 | 1.231157639  | 0.006323977 |
| ENSG00000150625 | -1.316499327 | 0.000000546 |
| ENSG00000150656 | -1.697799775 | 0.000000595 |
| ENSG00000150667 | 1.081374796  | 0.00000222  |
| ENSG00000150750 | 1.327431078  | 0.046662874 |
| ENSG00000151005 | 2.676915687  | 0.00000126  |
| ENSG00000151789 | -1.340952617 | 0.0000184   |
| ENSG00000151834 | 2.356635542  | 0.000597795 |
| ENSG00000151962 | 1.428946315  | 0.00000333  |
| ENSG00000152086 | 1.189046782  | 0.001204543 |
| ENSG00000152128 | -1.107934877 | 0.000415691 |
| ENSG00000152192 | 1.155386163  | 0.005489909 |
| ENSG00000152208 | 2.323131331  | 0.0000116   |
| ENSG00000152377 | -1.088807571 | 0.000579506 |
| ENSG00000152430 | 1.363188352  | 0.000713786 |
| ENSG00000152463 | -1.093478128 | 0.000697678 |
| ENSG00000152583 | -1.336742695 | 2.21E-08    |
| ENSG00000152670 | 1.51418168   | 0.00000978  |
| ENSG00000152822 | 1.878784854  | 1.14E-11    |
| ENSG00000152910 | 1.17038608   | 0.019371535 |
| ENSG00000152936 | 1.618551559  | 0.038348941 |
| ENSG00000153292 | -2.247949943 | 0.000000207 |
| ENSG00000153930 | -2.547550323 | 0.00000509  |
| ENSG00000154040 | 1.120211232  | 0.00013219  |
| ENSG00000154143 | 1.486850283  | 0.0037506   |
| ENSG00000154227 | 1.145587426  | 0.0000717   |
| ENSG00000154277 | 2.658891858  | 4.4E-17     |
| ENSG00000154319 | -1.130774464 | 0.000396266 |
| ENSG00000154415 | 2.645309055  | 0.028296804 |
| ENSG00000154611 | 2.266154971  | 0.000000035 |
| ENSG00000154645 | 1.815216347  | 6.92E-09    |
| ENSG00000154764 | -2.206870401 | 8.12E-09    |



|                 |              |             |
|-----------------|--------------|-------------|
| ENSG00000154839 | 1.210040248  | 4.68E-13    |
| ENSG00000154856 | -1.464560167 | 0.0000013   |
| ENSG00000154997 | 4.442443993  | 2.86E-14    |
| ENSG00000155495 | 1.525634015  | 0.017843927 |
| ENSG00000155622 | 3.050381915  | 0.00000164  |
| ENSG00000155761 | 1.008067976  | 0.003233538 |
| ENSG00000155816 | 1.412582428  | 0.002051447 |
| ENSG00000155886 | 1.608962372  | 0.00000161  |
| ENSG00000155897 | -2.533515865 | 0.000000544 |
| ENSG00000156006 | -1.084365689 | 0.00024496  |
| ENSG00000156009 | 3.161356862  | 6.72E-10    |
| ENSG00000156076 | 1.249077965  | 0.048277263 |
| ENSG00000156269 | 1.615961791  | 0.035186688 |
| ENSG00000156535 | 1.018556501  | 0.000000444 |
| ENSG00000156689 | 1.203838358  | 0.000522734 |
| ENSG00000157315 | -1.024687272 | 0.00000127  |
| ENSG00000157330 | 1.953789664  | 0.0000492   |
| ENSG00000157502 | 1.088718674  | 0.009228858 |
| ENSG00000157703 | 1.418463067  | 0.0000275   |
| ENSG00000157965 | 1.659184093  | 0.022458229 |
| ENSG00000158104 | -1.360517761 | 0.00000149  |
| ENSG00000158296 | -1.053701406 | 0.001812186 |
| ENSG00000158516 | 2.809842948  | 0.000000143 |
| ENSG00000158525 | 1.327619912  | 0.00000382  |
| ENSG00000158560 | -1.088750411 | 0.000496575 |
| ENSG00000158639 | 1.536535679  | 0.000298136 |
| ENSG00000159251 | -1.3966866   | 0.0000952   |
| ENSG00000159556 | 1.148004935  | 0.000277683 |
| ENSG00000159723 | -1.047982364 | 0.000125581 |
| ENSG00000160181 | 1.459610076  | 0.007889788 |
| ENSG00000160182 | 1.430930016  | 0.007098241 |
| ENSG00000160211 | 1.193993696  | 4.04E-11    |
| ENSG00000160224 | -1.140997831 | 0.000670453 |
| ENSG00000160339 | -1.578086786 | 0.0000022   |
| ENSG00000160505 | 2.537648146  | 9.45E-08    |
| ENSG00000160808 | -1.006725539 | 0.0000265   |
| ENSG00000160868 | -1.255610711 | 0.002110016 |
| ENSG00000160886 | 1.102089156  | 0.000680816 |
| ENSG00000160951 | -1.196311548 | 0.0000188   |
| ENSG00000161544 | -1.320496093 | 6.2E-19     |
| ENSG00000162069 | -1.300363066 | 0.002648327 |
| ENSG00000162383 | 1.531176256  | 0.00000154  |
| ENSG00000162624 | 2.333715499  | 0.004673557 |
| ENSG00000162669 | 1.053202536  | 0.0000528   |
| ENSG00000162761 | 1.089182138  | 0.001865879 |
| ENSG00000162763 | -1.169522781 | 0.023594741 |
| ENSG00000162779 | 1.719279086  | 4.01E-16    |
| ENSG00000162782 | 1.43733133   | 0.004482476 |
| ENSG00000162814 | 1.137599181  | 0.0000819   |
| ENSG00000162947 | -1.082732546 | 0.005608777 |
| ENSG00000162951 | -1.333707731 | 0.000350449 |
| ENSG00000163009 | 1.132668605  | 1.69E-08    |
| ENSG00000163053 | -1.18127054  | 0.000000951 |
| ENSG00000163071 | -2.472708295 | 1.01E-31    |
| ENSG00000163092 | 1.914760653  | 0.00025691  |
| ENSG00000163217 | -2.016240279 | 0.009300258 |
| ENSG00000163218 | 1.071517078  | 0.010938073 |
| ENSG00000163295 | 1.449834275  | 0.004637804 |

|                 |              |             |
|-----------------|--------------|-------------|
| ENSG00000163364 | 1.041480367  | 0.0000619   |
| ENSG00000163395 | -1.474043258 | 0.0000152   |
| ENSG00000163431 | -1.279914095 | 2.31E-11    |
| ENSG00000163507 | 1.120285522  | 9E-15       |
| ENSG00000163520 | -1.162900797 | 0.00000141  |
| ENSG00000163530 | 2.862866852  | 0.007220255 |
| ENSG00000163554 | 1.304689162  | 0.000116457 |
| ENSG00000163568 | 1.315798782  | 0.000000107 |
| ENSG00000163687 | -1.508984323 | 2.74E-14    |
| ENSG00000163735 | 1.857761264  | 0.000017    |
| ENSG00000163736 | -1.078496027 | 0.000936354 |
| ENSG00000163746 | 1.039379851  | 0.00029425  |
| ENSG00000163808 | 1.016960627  | 3.33E-09    |
| ENSG00000163815 | -1.280919926 | 8.29E-14    |
| ENSG00000164076 | 1.267064354  | 0.004958944 |
| ENSG00000164100 | -1.480490736 | 0.0000139   |
| ENSG00000164114 | -1.035971334 | 0.0000118   |
| ENSG00000164128 | -1.134105066 | 0.00000044  |
| ENSG00000164161 | -1.487723083 | 0.0000343   |
| ENSG00000164188 | -1.153367391 | 0.0000183   |
| ENSG00000164256 | 1.728914702  | 0.000000295 |
| ENSG00000164398 | -1.037336053 | 0.0000525   |
| ENSG00000164411 | 1.053930377  | 0.009592769 |
| ENSG00000164418 | 1.85076694   | 0.000000038 |
| ENSG00000164434 | 1.957575239  | 5.41E-09    |
| ENSG00000164438 | -2.226985838 | 0.020442762 |
| ENSG00000164530 | -1.23152845  | 0.0000637   |
| ENSG00000164687 | 1.04895689   | 1.98E-12    |
| ENSG00000164744 | 2.008205854  | 2.68E-11    |
| ENSG00000164756 | 2.545890863  | 9.03E-10    |
| ENSG00000164761 | 1.055687416  | 0.0000226   |
| ENSG00000164764 | -1.005125772 | 0.00000393  |
| ENSG00000164794 | 2.568919328  | 0.0000586   |
| ENSG00000164796 | 2.014694752  | 0.0000988   |
| ENSG00000164929 | -1.02437116  | 0.0000662   |
| ENSG00000164946 | 1.345005759  | 0.0000451   |
| ENSG00000165066 | 2.447748321  | 0.0000299   |
| ENSG00000165072 | -1.047147105 | 0.000000942 |
| ENSG00000165124 | -1.060803172 | 0.0000196   |
| ENSG00000165125 | -1.190388952 | 0.001989091 |
| ENSG00000165197 | -1.230635108 | 0.000003    |
| ENSG00000165349 | 1.605771319  | 0.030285518 |
| ENSG00000165376 | -1.223459417 | 0.0000293   |
| ENSG00000165383 | 1.079779905  | 0.028011138 |
| ENSG00000165478 | -1.790733706 | 0.000259207 |
| ENSG00000165496 | 1.231365642  | 0.010979133 |
| ENSG00000165509 | 2.515026607  | 0.00000552  |
| ENSG00000165553 | 1.6395538    | 0.00279541  |
| ENSG00000165584 | 1.940924639  | 0.012957371 |
| ENSG00000165643 | 1.278485766  | 0.007553814 |
| ENSG00000165682 | -2.940866028 | 4.04E-14    |
| ENSG00000165887 | -1.089735156 | 0.0000553   |
| ENSG00000165899 | 1.142641645  | 0.0000178   |
| ENSG00000165966 | -1.112443597 | 0.000892946 |
| ENSG00000166049 | 3.356486793  | 0.0000222   |
| ENSG00000166069 | 2.331741613  | 0.00000735  |
| ENSG00000166105 | 1.373673689  | 0.000600943 |
| ENSG00000166143 | 1.457513146  | 0.00000875  |

|                 |              |             |
|-----------------|--------------|-------------|
| ENSG00000166183 | -1.167488187 | 0.000211583 |
| ENSG00000166292 | -1.463286543 | 0.000000188 |
| ENSG00000166342 | -1.005723701 | 0.010605076 |
| ENSG00000166407 | -2.416604197 | 0.00000826  |
| ENSG00000166482 | -1.152886546 | 0.0000411   |
| ENSG00000166589 | -1.424498128 | 0.000103732 |
| ENSG00000166736 | 1.118284098  | 0.006326074 |
| ENSG00000166741 | -1.25546427  | 0.0000042   |
| ENSG00000166819 | -1.083392542 | 0.000000458 |
| ENSG00000166845 | 1.005681101  | 3.34E-14    |
| ENSG00000166856 | -1.477279242 | 5.41E-09    |
| ENSG00000166869 | 1.420139177  | 0.042034486 |
| ENSG00000166959 | 1.39986304   | 0.017297995 |
| ENSG00000166961 | 1.939607317  | 0.000113421 |
| ENSG00000166979 | -1.032140235 | 0.000000228 |
| ENSG00000167014 | -1.755181448 | 0.00000161  |
| ENSG00000167311 | 1.036572425  | 0.005882675 |
| ENSG00000167355 | 1.07831055   | 0.021971994 |
| ENSG00000167419 | 1.241739796  | 0.000120809 |
| ENSG00000167434 | -1.19110601  | 0.000200827 |
| ENSG00000167608 | -1.411376367 | 0.0000014   |
| ENSG00000167741 | -1.035878274 | 0.009418945 |
| ENSG00000167748 | 1.083440734  | 0.001093117 |
| ENSG00000167749 | -1.795646895 | 0.001918972 |
| ENSG00000167757 | -1.407764029 | 0.006813002 |
| ENSG00000167769 | -2.196495689 | 0.000000017 |
| ENSG00000167771 | 1.456506872  | 5.73E-08    |
| ENSG00000167941 | 1.220696145  | 0.022786236 |
| ENSG00000168070 | -1.009958578 | 0.011867172 |
| ENSG00000168079 | -1.451437098 | 0.0000454   |
| ENSG00000168333 | 2.535745257  | 0.002051447 |
| ENSG00000168481 | -1.315493772 | 0.000314449 |
| ENSG00000168631 | -2.591723294 | 9.26E-09    |
| ENSG00000168671 | 1.137752493  | 0.000451073 |
| ENSG00000168702 | 1.386944743  | 0.000384798 |
| ENSG00000168754 | 1.147882469  | 0.016664257 |
| ENSG00000168779 | 1.799083134  | 2.29E-12    |
| ENSG00000168907 | -1.343104604 | 0.000828127 |
| ENSG00000169059 | 2.345516195  | 0.00000453  |
| ENSG00000169064 | 1.370130436  | 0.004866187 |
| ENSG00000169218 | -1.075151385 | 0.037710635 |
| ENSG00000169297 | 3.122954635  | 2.96E-08    |
| ENSG00000169347 | -1.554110618 | 0.007058634 |
| ENSG00000169385 | 1.077296548  | 0.000145791 |
| ENSG00000169427 | 1.376735142  | 0.001025095 |
| ENSG00000169507 | -1.01034326  | 0.000000386 |
| ENSG00000169550 | 1.441623733  | 0.01796711  |
| ENSG00000169551 | 4.632427048  | 1.51E-14    |
| ENSG00000169583 | 1.061169475  | 0.00000605  |
| ENSG00000169688 | 3.840946766  | 1.94E-08    |
| ENSG00000169836 | 2.243354173  | 0.002513419 |
| ENSG00000169877 | -1.419021526 | 0.0000649   |
| ENSG00000170044 | 1.206427167  | 0.016438347 |
| ENSG00000170153 | -1.296583105 | 0.000000325 |
| ENSG00000170162 | 3.331810263  | 0.0000557   |
| ENSG00000170231 | 3.056379992  | 1.05E-14    |
| ENSG00000170289 | 1.507822953  | 0.000000841 |
| ENSG00000170298 | -1.034611091 | 0.011674506 |

|                 |              |             |
|-----------------|--------------|-------------|
| ENSG00000170324 | -1.095038692 | 0.006324363 |
| ENSG00000170367 | -1.577689949 | 0.001453766 |
| ENSG00000170381 | 1.364340481  | 0.009816284 |
| ENSG00000170396 | 1.679819025  | 5.33E-10    |
| ENSG00000170423 | 1.319947436  | 0.011263879 |
| ENSG00000170476 | 1.102893055  | 0.000705871 |
| ENSG00000170477 | 1.516917137  | 0.025168234 |
| ENSG00000170577 | 1.338926459  | 0.000129339 |
| ENSG00000170627 | 1.428583283  | 0.000498251 |
| ENSG00000170684 | 1.014545551  | 3.13E-08    |
| ENSG00000170837 | -1.287235348 | 0.00061923  |
| ENSG00000170893 | 1.859412408  | 0.000056    |
| ENSG00000170927 | -1.130598284 | 0.00020302  |
| ENSG00000170965 | 2.674061238  | 1.05E-14    |
| ENSG00000171033 | 1.814053894  | 7.98E-12    |
| ENSG00000171136 | 2.364594057  | 0.00000524  |
| ENSG00000171199 | -1.789116636 | 0.0000016   |
| ENSG00000171209 | -1.659358435 | 0.02848022  |
| ENSG00000171431 | 2.072679998  | 0.00000765  |
| ENSG00000171450 | 2.14025946   | 0.00000196  |
| ENSG00000171483 | 2.207805677  | 0.000192492 |
| ENSG00000171487 | 2.411676806  | 0.00000167  |
| ENSG00000171502 | 1.810399268  | 6.94E-10    |
| ENSG00000171517 | 1.282872337  | 0.011165831 |
| ENSG00000171551 | -2.210910817 | 7.79E-08    |
| ENSG00000171557 | -1.010264007 | 1.23E-08    |
| ENSG00000171560 | -1.039247385 | 1.08E-09    |
| ENSG00000171631 | 1.001907161  | 0.000000436 |
| ENSG00000171798 | -1.137987366 | 0.001610359 |
| ENSG00000171811 | -2.035190074 | 1.39E-09    |
| ENSG00000171819 | -1.873549422 | 0.001017697 |
| ENSG00000172016 | -2.993285221 | 0.000000443 |
| ENSG00000172020 | 2.199368487  | 3.3E-16     |
| ENSG00000172073 | -3.805979401 | 0.00000196  |
| ENSG00000172159 | -1.360354106 | 3.92E-11    |
| ENSG00000172179 | 1.728394969  | 0.024439605 |
| ENSG00000172236 | -1.116548486 | 0.000116285 |
| ENSG00000172403 | -1.022840097 | 6.94E-10    |
| ENSG00000172425 | -1.108606949 | 0.000676564 |
| ENSG00000172689 | -1.220897597 | 0.039433116 |
| ENSG00000172724 | -1.179082351 | 0.000438416 |
| ENSG00000172818 | -1.49398587  | 0.000097    |
| ENSG00000172901 | 1.101211678  | 0.0000398   |
| ENSG00000172955 | -1.000583346 | 1.99E-08    |
| ENSG00000173080 | 1.759315422  | 0.00000221  |
| ENSG00000173093 | 1.321859967  | 0.001604348 |
| ENSG00000173157 | 2.517304562  | 1.59E-08    |
| ENSG00000173432 | -1.955549947 | 1.85E-08    |
| ENSG00000173585 | -1.045788399 | 0.000825363 |
| ENSG00000173597 | -1.489521503 | 3.16E-10    |
| ENSG00000173612 | 3.083486988  | 1.71E-08    |
| ENSG00000173727 | 1.048554142  | 0.0000059   |
| ENSG00000173769 | 1.854865254  | 0.000425689 |
| ENSG00000173811 | 1.2776829    | 5.55E-09    |
| ENSG00000173826 | -1.259566321 | 0.001093117 |
| ENSG00000173894 | 1.00013175   | 4.55E-09    |
| ENSG00000173988 | 1.203665686  | 0.000000114 |
| ENSG00000174015 | 1.340335223  | 0.010162431 |

|                 |              |             |
|-----------------|--------------|-------------|
| ENSG00000174307 | -1.887820175 | 1.99E-25    |
| ENSG00000174326 | -1.420161404 | 3.7E-09     |
| ENSG00000174343 | 1.952245318  | 0.0000193   |
| ENSG00000174448 | 1.508299115  | 0.00000302  |
| ENSG00000174473 | -1.159117    | 0.020257071 |
| ENSG00000174482 | 1.358561092  | 0.001885646 |
| ENSG00000174607 | 1.343924876  | 0.000521224 |
| ENSG00000174776 | 1.614265417  | 0.00000202  |
| ENSG00000174837 | 1.085572889  | 0.000000493 |
| ENSG00000174899 | 2.212804234  | 0.000000025 |
| ENSG00000175426 | -2.318690625 | 1.38E-12    |
| ENSG00000175497 | -1.95301341  | 0.001142528 |
| ENSG00000175697 | 1.109616031  | 0.00000165  |
| ENSG00000175785 | -2.035342344 | 0.00000606  |
| ENSG00000175899 | -1.003454228 | 0.000000104 |
| ENSG00000176165 | 3.541206366  | 0.000000673 |
| ENSG00000176170 | 1.177135801  | 0.0000125   |
| ENSG00000176194 | -1.827558742 | 0.006658665 |
| ENSG00000176349 | -1.0630217   | 0.011691654 |
| ENSG00000176406 | 1.519470134  | 0.0000216   |
| ENSG00000176746 | 1.32496409   | 0.027148271 |
| ENSG00000176769 | -2.418435403 | 0.000000209 |
| ENSG00000177143 | 2.488998556  | 0.003208828 |
| ENSG00000177238 | 1.084366078  | 0.0000178   |
| ENSG00000177354 | -1.271135764 | 0.041700791 |
| ENSG00000177504 | 1.836015162  | 0.003243262 |
| ENSG00000177519 | 1.754763819  | 0.000265146 |
| ENSG00000177551 | 2.317280902  | 0.000123025 |
| ENSG00000177679 | -1.380023441 | 0.000000885 |
| ENSG00000177689 | 1.69927853   | 0.014152489 |
| ENSG00000177910 | 1.600008088  | 0.002927033 |
| ENSG00000177984 | 1.192863126  | 0.011312196 |
| ENSG00000178084 | 1.095018891  | 0.013869582 |
| ENSG00000178125 | 1.083767582  | 0.002637762 |
| ENSG00000178235 | 2.267972625  | 0.000782046 |
| ENSG00000178343 | -1.464717314 | 0.00000029  |
| ENSG00000178395 | 1.093750542  | 0.027333864 |
| ENSG00000178473 | 1.843837498  | 0.000328567 |
| ENSG00000178522 | -1.469522046 | 0.021966218 |
| ENSG00000178773 | -1.065594278 | 0.0000773   |
| ENSG00000179083 | 1.118319899  | 0.018088432 |
| ENSG00000179142 | -3.273868982 | 0.019784166 |
| ENSG00000179178 | -1.418510169 | 0.00000634  |
| ENSG00000179826 | 1.633703901  | 0.003324997 |
| ENSG00000180066 | 1.847146656  | 0.0000439   |
| ENSG00000180178 | 1.588954272  | 0.00798772  |
| ENSG00000180318 | 2.825752146  | 0.0009271   |
| ENSG00000180438 | 2.20564864   | 4.11E-10    |
| ENSG00000180988 | 1.493766663  | 0.000404056 |
| ENSG00000181092 | -1.413902045 | 0.032677134 |
| ENSG00000181234 | -1.343445075 | 0.008649306 |
| ENSG00000181291 | -1.085186624 | 0.00000699  |
| ENSG00000181355 | 1.753345809  | 0.004071541 |
| ENSG00000181433 | 2.116072532  | 0.004375063 |
| ENSG00000181544 | 1.069264751  | 2.21E-14    |
| ENSG00000181562 | -2.439139075 | 0.045270463 |
| ENSG00000181626 | 1.010344657  | 0.002184824 |
| ENSG00000181778 | -1.665986913 | 0.0000792   |

|                 |              |             |
|-----------------|--------------|-------------|
| ENSG00000181800 | 1.731594107  | 0.0000519   |
| ENSG00000182040 | 1.556795622  | 0.00027605  |
| ENSG00000182077 | 1.427189885  | 0.02242669  |
| ENSG00000182271 | 1.029793029  | 0.021165866 |
| ENSG00000182272 | -1.460121116 | 0.000412192 |
| ENSG00000182389 | -1.079877283 | 0.0000391   |
| ENSG00000182566 | -1.949944176 | 7.3E-11     |
| ENSG00000182580 | 1.56417066   | 6.95E-11    |
| ENSG00000182583 | 1.222123203  | 0.015930316 |
| ENSG00000182601 | 1.84211317   | 0.025463575 |
| ENSG00000182632 | 2.363369468  | 0.00000604  |
| ENSG00000182798 | 1.196516761  | 0.007103601 |
| ENSG00000182938 | -2.280630772 | 0.001069257 |
| ENSG00000182968 | -1.716848439 | 0.020147844 |
| ENSG00000183018 | -1.385111075 | 1.02E-12    |
| ENSG00000183036 | -2.678491077 | 0.00000048  |
| ENSG00000183117 | 1.033352275  | 0.023548029 |
| ENSG00000183154 | -1.195893096 | 8.82E-09    |
| ENSG00000183230 | -1.127571425 | 0.0000303   |
| ENSG00000183251 | 1.637722416  | 0.021680251 |
| ENSG00000183269 | -2.259521809 | 0.000424713 |
| ENSG00000183347 | 1.177346296  | 0.00000723  |
| ENSG00000183378 | 1.199781931  | 0.001139058 |
| ENSG00000183570 | -1.263476228 | 0.000000415 |
| ENSG00000183734 | 1.008251975  | 0.000028    |
| ENSG00000183763 | 1.092639583  | 2.31E-18    |
| ENSG00000183784 | -1.075146904 | 0.00041751  |
| ENSG00000183888 | -1.441082243 | 0.003349483 |
| ENSG00000183960 | 1.14790374   | 0.002766609 |
| ENSG00000184106 | 1.350358755  | 0.003486352 |
| ENSG00000184113 | -1.063493579 | 1.35E-09    |
| ENSG00000184226 | 1.196089337  | 0.00000354  |
| ENSG00000184254 | -1.127418451 | 0.00000179  |
| ENSG00000184374 | -1.599850074 | 2.58E-09    |
| ENSG00000184611 | 1.493089343  | 0.0000116   |
| ENSG00000184709 | -1.179401229 | 0.005523729 |
| ENSG00000184845 | -1.828137711 | 3.48E-09    |
| ENSG00000184905 | 1.49918714   | 0.000087    |
| ENSG00000184956 | -1.84056673  | 0.00000423  |
| ENSG00000185038 | -2.1874552   | 2.04E-10    |
| ENSG00000185105 | 1.106997882  | 0.0000996   |
| ENSG00000185186 | -1.219278226 | 0.000038    |
| ENSG00000185247 | 3.21106785   | 0.00000497  |
| ENSG00000185274 | -1.525799803 | 0.00000286  |
| ENSG00000185306 | 1.717479083  | 0.0000183   |
| ENSG00000185615 | 1.691784779  | 0.000000446 |
| ENSG00000185640 | 1.139462495  | 0.02720096  |
| ENSG00000185904 | 1.589707515  | 5.26E-14    |
| ENSG00000185940 | -1.219190721 | 0.048057059 |
| ENSG00000185942 | 1.09322779   | 0.003783711 |
| ENSG00000186019 | 1.193005257  | 3.64E-08    |
| ENSG00000186086 | 2.832644262  | 0.0000216   |
| ENSG00000186185 | 1.111513309  | 5.35E-11    |
| ENSG00000186281 | 1.059461232  | 0.00000083  |
| ENSG00000186335 | 1.447942177  | 0.00000636  |
| ENSG00000186439 | 1.8720755    | 0.0000069   |
| ENSG00000186487 | 1.188110966  | 0.012072452 |
| ENSG00000186493 | -1.298649723 | 0.010674434 |

|                 |              |             |
|-----------------|--------------|-------------|
| ENSG00000186675 | 1.561569047  | 0.001760806 |
| ENSG00000186832 | 1.343078031  | 0.015017851 |
| ENSG00000186867 | -1.312294535 | 0.0000612   |
| ENSG00000186871 | 1.016005845  | 4.3E-11     |
| ENSG00000186973 | 1.406599565  | 0.00016686  |
| ENSG00000186977 | 1.988497841  | 0.042780498 |
| ENSG00000187123 | 1.03014202   | 0.000795367 |
| ENSG00000187166 | 1.518863417  | 0.000479003 |
| ENSG00000187210 | 1.147030045  | 3.35E-09    |
| ENSG00000187258 | 1.062862509  | 0.013380387 |
| ENSG00000187398 | -2.294434045 | 1.54E-10    |
| ENSG00000187416 | 1.329165728  | 0.006208313 |
| ENSG00000187581 | 1.193863196  | 0.006156503 |
| ENSG00000187616 | 1.105930758  | 0.003654166 |
| ENSG00000187621 | 1.678811664  | 0.000000384 |
| ENSG00000187672 | 1.167135944  | 0.000609216 |
| ENSG00000187690 | 2.711078443  | 0.00000608  |
| ENSG00000187715 | 1.307267621  | 0.000774467 |
| ENSG00000187772 | 2.144082527  | 0.002521165 |
| ENSG00000187848 | -2.474914978 | 6.4E-09     |
| ENSG00000187855 | -1.009243932 | 0.010033649 |
| ENSG00000187908 | 1.995566289  | 0.000000682 |
| ENSG00000187922 | -1.696151404 | 0.000000343 |
| ENSG00000187957 | -1.286181152 | 0.010344296 |
| ENSG00000188056 | 1.493318485  | 0.002515618 |
| ENSG00000188175 | 1.047843255  | 0.004029262 |
| ENSG00000188219 | 1.296737786  | 0.0000182   |
| ENSG00000188257 | -1.865112915 | 0.00000183  |
| ENSG00000188512 | 1.258219664  | 0.00000171  |
| ENSG00000188580 | 1.088508785  | 0.00266084  |
| ENSG00000188610 | 1.007875472  | 6.84E-10    |
| ENSG00000188662 | 1.708543964  | 0.00010517  |
| ENSG00000188729 | 1.173960053  | 0.000227421 |
| ENSG00000188730 | -1.117750755 | 0.023385637 |
| ENSG00000188783 | -1.104779572 | 0.00000885  |
| ENSG00000188816 | 1.584151892  | 0.030459771 |
| ENSG00000188958 | 1.003908606  | 0.00058424  |
| ENSG00000189064 | 2.762891849  | 0.000982767 |
| ENSG00000189212 | 1.13767273   | 0.0000773   |
| ENSG00000189229 | 1.765314701  | 0.000147475 |
| ENSG00000189238 | 1.542352672  | 4.04E-11    |
| ENSG00000189292 | -1.11011671  | 0.000612292 |
| ENSG00000189377 | 1.561159398  | 0.000000531 |
| ENSG00000196096 | 1.007812319  | 0.000480492 |
| ENSG00000196104 | 1.193796889  | 0.037085569 |
| ENSG00000196119 | 1.357237707  | 0.028997035 |
| ENSG00000196136 | -1.068738042 | 0.000000055 |
| ENSG00000196188 | 2.124796616  | 0.000000101 |
| ENSG00000196289 | 1.342179034  | 0.000846672 |
| ENSG00000196335 | 1.324917155  | 6.41E-08    |
| ENSG00000196353 | 1.659656605  | 0.000000872 |
| ENSG00000196427 | 2.429404517  | 0.00000283  |
| ENSG00000196542 | 1.270504373  | 0.0000989   |
| ENSG00000196553 | -2.098278025 | 8.32E-10    |
| ENSG00000196581 | -1.109076613 | 0.000102333 |
| ENSG00000196593 | 1.818763372  | 0.002798983 |
| ENSG00000196611 | 1.715368187  | 2.18E-11    |
| ENSG00000196616 | -1.067495469 | 0.0000117   |

|                 |              |             |
|-----------------|--------------|-------------|
| ENSG00000196711 | -1.569866131 | 0.001863643 |
| ENSG00000196793 | 1.013677847  | 0.00000645  |
| ENSG00000196990 | -1.361432679 | 0.000157906 |
| ENSG00000197083 | 1.131322433  | 0.0000183   |
| ENSG00000197172 | 1.379974302  | 0.042595575 |
| ENSG00000197177 | -1.863890001 | 0.000212451 |
| ENSG00000197320 | 1.12674808   | 0.042602863 |
| ENSG00000197353 | -1.738052302 | 0.000138281 |
| ENSG00000197360 | 1.398566841  | 0.002482709 |
| ENSG00000197406 | -1.857775142 | 0.000000542 |
| ENSG00000197410 | 1.119149822  | 0.001307909 |
| ENSG00000197465 | -1.166946097 | 0.00000222  |
| ENSG00000197472 | 1.011706313  | 0.00798772  |
| ENSG00000197558 | -1.038263856 | 8.77E-08    |
| ENSG00000197595 | 1.161593242  | 0.0000145   |
| ENSG00000197838 | -1.151336448 | 0.00442883  |
| ENSG00000198033 | 1.869496921  | 0.00797724  |
| ENSG00000198099 | -1.338693804 | 0.00000295  |
| ENSG00000198354 | 1.239380613  | 0.041607654 |
| ENSG00000198384 | 1.322651925  | 0.027031171 |
| ENSG00000198398 | 1.546033955  | 0.039958949 |
| ENSG00000198443 | 1.555495155  | 0.029955622 |
| ENSG00000198798 | 2.012537693  | 0.001675359 |
| ENSG00000198822 | 1.255767558  | 0.002003189 |
| ENSG00000198883 | 2.084244644  | 0.00000311  |
| ENSG00000198930 | 1.57054915   | 0.001629045 |
| ENSG00000199370 | -1.086561689 | 0.026205356 |
| ENSG00000202379 | 1.013761563  | 0.004767526 |
| ENSG00000203523 | 1.271277996  | 0.004391084 |
| ENSG00000203593 | -1.36090522  | 0.0000115   |
| ENSG00000203645 | 1.320253398  | 0.000417038 |
| ENSG00000203690 | 1.003368497  | 0.028681047 |
| ENSG00000203740 | 1.738819531  | 0.000277282 |
| ENSG00000203858 | 1.28315633   | 0.001477138 |
| ENSG00000203877 | 1.840438033  | 0.008023388 |
| ENSG00000203930 | 1.636733812  | 0.001027854 |
| ENSG00000203933 | -1.134594826 | 0.005240106 |
| ENSG00000203989 | 2.301831844  | 0.015959025 |
| ENSG00000204118 | 2.079766187  | 0.00000315  |
| ENSG00000204140 | 1.838428789  | 0.034054262 |
| ENSG00000204248 | 1.149832861  | 4.27E-09    |
| ENSG00000204277 | 1.052275983  | 0.002695848 |
| ENSG00000204362 | 1.27952721   | 0.007655455 |
| ENSG00000204382 | 1.646280876  | 0.002381296 |
| ENSG00000204434 | 1.82937501   | 3.54E-08    |
| ENSG00000204460 | 1.824584768  | 0.022355991 |
| ENSG00000204464 | 1.405493514  | 0.000552791 |
| ENSG00000204511 | -1.053701569 | 0.046167973 |
| ENSG00000204583 | -1.392663012 | 0.00000654  |
| ENSG00000204624 | 1.367117569  | 0.0000015   |
| ENSG00000204644 | 1.398929071  | 0.000256533 |
| ENSG00000204648 | 2.418702424  | 0.008054307 |
| ENSG00000204740 | 1.450004579  | 0.00000188  |
| ENSG00000204754 | -3.077545862 | 0.003964051 |
| ENSG00000204889 | 1.016754815  | 0.042472473 |
| ENSG00000204949 | -1.665782793 | 0.000174184 |
| ENSG00000204978 | 1.136583248  | 0.002309867 |
| ENSG00000204979 | 2.413071707  | 0.000299561 |



|                 |              |             |
|-----------------|--------------|-------------|
| ENSG00000204983 | 2.858824219  | 0.00000374  |
| ENSG00000204993 | -1.651976287 | 0.004301812 |
| ENSG00000205212 | 2.146436629  | 0.000323713 |
| ENSG00000205266 | -1.036241783 | 0.048979916 |
| ENSG00000205274 | 1.437907503  | 0.021175462 |
| ENSG00000205293 | -1.023909937 | 0.024272985 |
| ENSG00000205300 | 1.71640873   | 0.006153373 |
| ENSG00000205312 | -1.322989445 | 0.000329733 |
| ENSG00000205363 | -1.097726039 | 0.0000229   |
| ENSG00000205396 | 1.157578977  | 0.018088432 |
| ENSG00000205403 | -1.005693068 | 9.2E-16     |
| ENSG00000205420 | 1.694334508  | 0.01218694  |
| ENSG00000205456 | 1.14956029   | 0.007263144 |
| ENSG00000205549 | 1.077570646  | 0.016904439 |
| ENSG00000205634 | 1.888919911  | 0.000113506 |
| ENSG00000205642 | 2.325778275  | 1.69E-08    |
| ENSG00000205704 | 1.45210015   | 1.18E-10    |
| ENSG00000205777 | 2.454614791  | 0.002124061 |
| ENSG00000205786 | 1.055826614  | 0.000598229 |
| ENSG00000205899 | -2.525162595 | 0.0000652   |
| ENSG00000206013 | -1.680365696 | 0.0000558   |
| ENSG00000206073 | 2.109792077  | 0.00398921  |
| ENSG00000206120 | 1.256334413  | 0.001351143 |
| ENSG00000206129 | 1.951278442  | 0.000000979 |
| ENSG00000206532 | 1.597636526  | 8.66E-13    |
| ENSG00000207148 | -1.036943356 | 0.048010818 |
| ENSG00000208037 | 1.383736459  | 0.001181326 |
| ENSG00000211592 | 1.375247913  | 0.0000874   |
| ENSG00000211598 | 1.204920334  | 0.001187831 |
| ENSG00000211632 | 1.320345302  | 0.004225847 |
| ENSG00000211633 | 1.54451341   | 0.003441053 |
| ENSG00000211648 | 1.03378446   | 0.010354324 |
| ENSG00000211659 | 1.192911726  | 0.00118213  |
| ENSG00000211660 | 1.087062449  | 0.00417186  |
| ENSG00000211668 | 1.008576003  | 0.00743546  |
| ENSG00000211669 | 1.157213471  | 0.004329794 |
| ENSG00000211672 | -1.357435199 | 0.019133857 |
| ENSG00000211896 | 1.340439738  | 0.000409801 |
| ENSG00000211934 | 1.131034233  | 0.011010954 |
| ENSG00000211950 | 1.148430614  | 0.004551306 |
| ENSG00000211964 | 1.05325193   | 0.01120364  |
| ENSG00000211976 | 1.141895584  | 0.009901302 |
| ENSG00000212663 | 1.114848389  | 0.000781517 |
| ENSG00000213061 | -1.193385368 | 0.001326063 |
| ENSG00000213085 | 1.080270255  | 0.000000118 |
| ENSG00000213115 | 3.537633918  | 0.0000484   |
| ENSG00000213225 | 1.756347834  | 7.75E-11    |
| ENSG00000213232 | 2.335229412  | 0.005213487 |
| ENSG00000213401 | 1.374626099  | 0.043230278 |
| ENSG00000213468 | 1.11932375   | 0.00000654  |
| ENSG00000213730 | 1.414450495  | 0.0000512   |
| ENSG00000213854 | -1.540115231 | 0.042749842 |
| ENSG00000213892 | 1.092179418  | 0.0000665   |
| ENSG00000213931 | 2.94776484   | 4.09E-10    |
| ENSG00000213946 | -1.086287664 | 0.007307368 |
| ENSG00000213988 | 1.314373444  | 9.12E-11    |
| ENSG00000214003 | 2.54728632   | 1.58E-08    |
| ENSG00000214107 | 2.910081886  | 0.000127588 |

|                 |              |             |
|-----------------|--------------|-------------|
| ENSG00000214429 | 1.048510388  | 0.024461205 |
| ENSG00000214617 | 3.078723078  | 0.00000319  |
| ENSG00000214725 | 1.040247038  | 0.0000101   |
| ENSG00000214772 | 1.315141502  | 0.00000937  |
| ENSG00000214814 | -1.432596432 | 0.002011998 |
| ENSG00000214856 | -2.974779684 | 0.000150231 |
| ENSG00000214929 | 2.362949975  | 0.012253936 |
| ENSG00000215057 | 1.071556027  | 0.033148345 |
| ENSG00000215146 | 1.101502289  | 0.0000572   |
| ENSG00000215196 | -2.824094643 | 0.00000408  |
| ENSG00000215218 | -1.198382743 | 0.00000411  |
| ENSG00000215262 | -1.451149227 | 0.021024439 |
| ENSG00000215533 | 1.795265004  | 5.96E-10    |
| ENSG00000215559 | -1.021363951 | 0.004518532 |
| ENSG00000215784 | 1.135728532  | 4.68E-11    |
| ENSG00000215808 | 1.746820512  | 0.00014428  |
| ENSG00000215869 | 1.678633757  | 1.12E-08    |
| ENSG00000216721 | 1.495447929  | 0.00000604  |
| ENSG00000216835 | 1.223921311  | 0.000463191 |
| ENSG00000216921 | -1.788614077 | 0.00000113  |
| ENSG00000217078 | 1.089382126  | 0.000726432 |
| ENSG00000217825 | -2.002965023 | 0.002611964 |
| ENSG00000217950 | 1.484008711  | 1.1E-13     |
| ENSG00000218027 | 1.033726171  | 0.017110643 |
| ENSG00000218048 | 1.575791821  | 0.00000392  |
| ENSG00000218073 | 1.014508862  | 0.001843454 |
| ENSG00000218672 | -1.554266166 | 0.020869345 |
| ENSG00000218690 | -1.469846575 | 0.004231914 |
| ENSG00000219438 | -1.311546412 | 0.000215125 |
| ENSG00000219867 | 1.19038059   | 0.045635659 |
| ENSG00000219926 | 1.134089294  | 0.01871485  |
| ENSG00000220267 | 1.782847208  | 0.0000026   |
| ENSG00000221083 | 1.063641517  | 0.015642258 |
| ENSG00000221866 | -1.369558844 | 0.00000428  |
| ENSG00000221867 | 1.295869664  | 0.041443211 |
| ENSG00000222004 | 1.544341964  | 0.0000114   |
| ENSG00000222030 | 1.608025335  | 0.035201361 |
| ENSG00000222764 | 2.166777686  | 0.000235359 |
| ENSG00000222881 | 1.155056634  | 0.001185086 |
| ENSG00000223318 | -1.211077334 | 0.000000648 |
| ENSG00000223404 | 1.307060575  | 0.007646208 |
| ENSG00000223553 | 2.619766833  | 2.01E-09    |
| ENSG00000223561 | -2.038327368 | 3.01E-08    |
| ENSG00000223563 | 1.872586725  | 0.013588916 |
| ENSG00000223564 | 1.733063487  | 0.006148797 |
| ENSG00000223609 | -2.275717207 | 7.01E-08    |
| ENSG00000223614 | 1.8829124    | 0.033921455 |
| ENSG00000223715 | 1.079195191  | 0.008429377 |
| ENSG00000223760 | 2.25736147   | 0.00088436  |
| ENSG00000223764 | -1.517721463 | 0.000000103 |
| ENSG00000223812 | 4.654271457  | 8.69E-13    |
| ENSG00000223907 | 1.011484738  | 0.0000434   |
| ENSG00000224034 | 1.111052886  | 0.00000158  |
| ENSG00000224074 | 1.094729758  | 0.000442081 |
| ENSG00000224228 | 1.525857789  | 0.000829753 |
| ENSG00000224271 | 1.322231115  | 0.002788539 |
| ENSG00000224273 | -1.184649956 | 0.001977178 |
| ENSG00000224286 | 1.057431075  | 0.02195622  |

|                 |              |             |
|-----------------|--------------|-------------|
| ENSG00000224309 | 1.391541005  | 0.029612585 |
| ENSG00000224324 | 1.019491189  | 0.000197902 |
| ENSG00000224409 | 1.20135502   | 0.022694775 |
| ENSG00000224458 | 1.347585058  | 0.022820363 |
| ENSG00000224525 | 2.658142805  | 0.000000599 |
| ENSG00000224559 | 2.274073928  | 0.0000135   |
| ENSG00000224568 | 2.154696824  | 0.004455216 |
| ENSG00000224569 | 1.205629976  | 0.029233094 |
| ENSG00000224592 | -1.068522254 | 0.015417435 |
| ENSG00000224659 | 2.454014399  | 0.007581693 |
| ENSG00000224679 | 1.911400125  | 0.027932024 |
| ENSG00000224728 | 1.093107569  | 0.000000267 |
| ENSG00000224775 | 1.530336918  | 0.001057635 |
| ENSG00000224802 | 1.303325134  | 0.013165981 |
| ENSG00000224817 | 2.319933118  | 0.001471952 |
| ENSG00000224881 | 1.213433243  | 0.006913952 |
| ENSG00000224893 | 2.000586051  | 0.008556488 |
| ENSG00000224899 | 3.186480601  | 0.0000225   |
| ENSG00000224958 | -1.420661597 | 0.000046    |
| ENSG00000225087 | 2.229467974  | 0.0000704   |
| ENSG00000225101 | 1.18866476   | 0.000345227 |
| ENSG00000225127 | 1.758955638  | 0.012187112 |
| ENSG00000225156 | 1.890919394  | 0.00000193  |
| ENSG00000225217 | 1.120346777  | 0.00000063  |
| ENSG00000225226 | 2.781856879  | 0.0002577   |
| ENSG00000225255 | 1.616367902  | 0.001204773 |
| ENSG00000225329 | 1.238930399  | 0.003865741 |
| ENSG00000225366 | -1.638916075 | 0.000714234 |
| ENSG00000225406 | 1.050052554  | 0.004275347 |
| ENSG00000225420 | -2.008046349 | 0.00000117  |
| ENSG00000225457 | 1.506229008  | 0.010451811 |
| ENSG00000225511 | -1.068525355 | 0.00000252  |
| ENSG00000225530 | 1.410411855  | 0.007588996 |
| ENSG00000225532 | 1.764751799  | 0.00000171  |
| ENSG00000225539 | 1.608543503  | 0.010968929 |
| ENSG00000225541 | 1.14774146   | 0.011988922 |
| ENSG00000225542 | 1.767878511  | 0.006934357 |
| ENSG00000225548 | 1.675670736  | 0.001165283 |
| ENSG00000225611 | -1.129647682 | 0.002293527 |
| ENSG00000225678 | 2.170769282  | 0.000939391 |
| ENSG00000225684 | 1.283783471  | 0.000000609 |
| ENSG00000225868 | 1.396485857  | 0.00042048  |
| ENSG00000225882 | 2.132513369  | 0.034806018 |
| ENSG00000225972 | 4.052428283  | 2.85E-73    |
| ENSG00000225978 | -1.028586487 | 0.000298136 |
| ENSG00000225988 | 2.03496615   | 0.02655479  |
| ENSG00000226004 | 1.272050118  | 0.001017697 |
| ENSG00000226025 | 1.927877394  | 9.29E-09    |
| ENSG00000226057 | 2.087479763  | 0.003898389 |
| ENSG00000226130 | -1.738480388 | 0.0000693   |
| ENSG00000226252 | -1.045102562 | 0.000000945 |
| ENSG00000226258 | 1.406752722  | 0.008650727 |
| ENSG00000226291 | -1.078874982 | 0.016297308 |
| ENSG00000226337 | -2.226921194 | 0.001205087 |
| ENSG00000226421 | 1.062153568  | 0.000144157 |
| ENSG00000226434 | 1.716065301  | 0.038943442 |
| ENSG00000226468 | 1.809946455  | 0.0000172   |
| ENSG00000226472 | 1.048301393  | 0.0000592   |

|                 |              |             |
|-----------------|--------------|-------------|
| ENSG00000226476 | 1.837106974  | 0.0000187   |
| ENSG00000226521 | 1.631452192  | 0.000685679 |
| ENSG00000226539 | 1.780393342  | 0.000031    |
| ENSG00000226553 | 1.091504718  | 0.047548451 |
| ENSG00000226650 | 1.099581407  | 0.0000926   |
| ENSG00000226813 | 1.341125948  | 0.040775154 |
| ENSG00000226846 | 1.076673447  | 0.041344941 |
| ENSG00000226913 | 1.052084831  | 0.000000613 |
| ENSG00000226933 | 1.372458426  | 0.001402388 |
| ENSG00000226943 | 1.300495093  | 0.000256446 |
| ENSG00000226965 | -1.427205949 | 0.0000522   |
| ENSG00000227088 | 1.615145897  | 0.011222053 |
| ENSG00000227135 | 1.324401337  | 0.000400696 |
| ENSG00000227154 | 1.146205556  | 0.041093533 |
| ENSG00000227195 | 2.315529822  | 0.000122958 |
| ENSG00000227234 | 2.175940721  | 0.001070399 |
| ENSG00000227300 | -1.554674558 | 0.014132481 |
| ENSG00000227363 | 1.350630878  | 0.032626346 |
| ENSG00000227400 | 2.295466411  | 0.028867272 |
| ENSG00000227437 | 1.370769733  | 0.0000198   |
| ENSG00000227514 | 1.003153684  | 0.028724568 |
| ENSG00000227533 | 1.063543255  | 0.00000812  |
| ENSG00000227568 | -2.942782526 | 1.98E-10    |
| ENSG00000227619 | 1.270021022  | 0.000167016 |
| ENSG00000227681 | 1.709153013  | 0.00000741  |
| ENSG00000227683 | 1.554805492  | 0.029836351 |
| ENSG00000227706 | 2.726087363  | 0.002625891 |
| ENSG00000227790 | 1.556695812  | 0.011676889 |
| ENSG00000228020 | 2.619000669  | 3.28E-08    |
| ENSG00000228044 | 1.117732947  | 0.003933891 |
| ENSG00000228142 | 1.020975462  | 0.048567659 |
| ENSG00000228203 | 1.022042192  | 0.00072268  |
| ENSG00000228215 | 2.360253289  | 0.002200291 |
| ENSG00000228445 | -1.273784448 | 0.001172806 |
| ENSG00000228561 | 1.259046429  | 0.000491984 |
| ENSG00000228573 | 1.058931742  | 0.001048873 |
| ENSG00000228623 | 1.483412775  | 1.76E-09    |
| ENSG00000228636 | 2.365948787  | 0.006375654 |
| ENSG00000228689 | -1.295886265 | 0.013315768 |
| ENSG00000228708 | 1.794036848  | 0.013135849 |
| ENSG00000228742 | 1.935637379  | 0.00000892  |
| ENSG00000228793 | 1.196466363  | 0.000374715 |
| ENSG00000228837 | 1.665410955  | 0.003276202 |
| ENSG00000228874 | 1.410993056  | 0.002252246 |
| ENSG00000228915 | 1.274573646  | 5.13E-09    |
| ENSG00000228956 | 1.056913666  | 0.0000583   |
| ENSG00000228966 | 1.536020302  | 0.023748918 |
| ENSG00000228971 | 1.261720035  | 0.003331155 |
| ENSG00000228980 | 1.770296662  | 0.000156853 |
| ENSG00000229089 | 1.474110051  | 0.034584555 |
| ENSG00000229091 | 1.049676397  | 0.0000157   |
| ENSG00000229092 | 1.35536876   | 0.000210162 |
| ENSG00000229107 | 1.644454367  | 1.36E-08    |
| ENSG00000229108 | -1.377431124 | 0.002207329 |
| ENSG00000229131 | 1.622922418  | 0.016730875 |
| ENSG00000229165 | 1.252006621  | 0.013966492 |
| ENSG00000229205 | 2.812345213  | 0.0000507   |
| ENSG00000229243 | 1.318120361  | 0.030521714 |

|                 |              |             |
|-----------------|--------------|-------------|
| ENSG00000229359 | 1.000073295  | 0.022647617 |
| ENSG00000229404 | 1.446039606  | 0.01369919  |
| ENSG00000229425 | -1.054206194 | 0.001099488 |
| ENSG00000229481 | 1.038807782  | 0.002212499 |
| ENSG00000229613 | 1.163769073  | 0.032729974 |
| ENSG00000229618 | 1.738735047  | 0.0000576   |
| ENSG00000229751 | 1.054078049  | 0.005062152 |
| ENSG00000229757 | 1.491641052  | 0.0000195   |
| ENSG00000229781 | 1.079807045  | 0.021886589 |
| ENSG00000229835 | 1.025003154  | 0.000441344 |
| ENSG00000229855 | 2.730877402  | 0.00251435  |
| ENSG00000229876 | 1.705014556  | 0.001885646 |
| ENSG00000229901 | 1.11823665   | 0.004801718 |
| ENSG00000229921 | 2.005475944  | 0.000001    |
| ENSG00000229937 | 2.833206135  | 0.000000749 |
| ENSG00000229967 | 2.168476901  | 0.03763796  |
| ENSG00000229970 | 1.235611271  | 0.014683542 |
| ENSG00000229983 | 1.621640477  | 2.14E-09    |
| ENSG00000229989 | 1.135903189  | 0.007514406 |
| ENSG00000230006 | 1.211759736  | 0.00019765  |
| ENSG00000230010 | 1.21245013   | 0.00664564  |
| ENSG00000230053 | 1.40192452   | 0.046953967 |
| ENSG00000230258 | 2.034132211  | 0.000770975 |
| ENSG00000230269 | 2.310519217  | 0.0000289   |
| ENSG00000230345 | 1.071227404  | 0.024477468 |
| ENSG00000230356 | 1.133242506  | 0.002303263 |
| ENSG00000230392 | 2.01578271   | 0.000000314 |
| ENSG00000230426 | 1.648839608  | 0.013093437 |
| ENSG00000230432 | 1.437376595  | 0.016127511 |
| ENSG00000230435 | -1.07361918  | 0.012027298 |
| ENSG00000230450 | 1.14447625   | 0.014777898 |
| ENSG00000230526 | 1.134998976  | 0.0000769   |
| ENSG00000230533 | -1.103283922 | 0.00042977  |
| ENSG00000230561 | 1.198203954  | 1.09E-09    |
| ENSG00000230563 | 1.341290678  | 0.00060862  |
| ENSG00000230628 | 1.051765472  | 0.00190545  |
| ENSG00000230707 | 1.593746146  | 0.030316389 |
| ENSG00000230817 | 1.255313269  | 0.002540495 |
| ENSG00000230839 | 1.208987493  | 0.0000556   |
| ENSG00000230863 | 2.071320156  | 0.00000543  |
| ENSG00000230899 | 1.156439147  | 0.009609281 |
| ENSG00000230948 | -1.542558381 | 0.001919547 |
| ENSG00000231007 | 1.000659309  | 0.00000391  |
| ENSG00000231031 | 2.076058244  | 0.010054777 |
| ENSG00000231093 | 1.755385703  | 0.000813979 |
| ENSG00000231106 | 1.586836381  | 0.0000111   |
| ENSG00000231107 | 2.054483179  | 0.002098615 |
| ENSG00000231121 | -1.33345457  | 0.002128793 |
| ENSG00000231131 | -1.036750308 | 0.020163926 |
| ENSG00000231171 | 1.462710751  | 0.036416645 |
| ENSG00000231194 | 1.20982413   | 0.0000296   |
| ENSG00000231252 | 1.112705004  | 0.004032074 |
| ENSG00000231270 | 1.231862708  | 0.0000644   |
| ENSG00000231274 | 1.376570491  | 0.00000753  |
| ENSG00000231324 | -2.629337591 | 0.001749663 |
| ENSG00000231331 | 1.332976426  | 0.012068094 |
| ENSG00000231421 | 1.859911094  | 0.028642953 |
| ENSG00000231426 | 1.229904558  | 0.000212451 |

|                 |              |             |
|-----------------|--------------|-------------|
| ENSG00000231431 | 1.806596689  | 0.003738031 |
| ENSG00000231505 | 2.733542568  | 0.000034    |
| ENSG00000231528 | 1.063429229  | 0.00000284  |
| ENSG00000231532 | 3.752935666  | 2.07E-08    |
| ENSG00000231533 | 1.845820748  | 0.0000087   |
| ENSG00000231689 | 2.426699229  | 0.0000452   |
| ENSG00000231709 | 1.145166416  | 0.004997852 |
| ENSG00000231738 | 1.84850372   | 0.004191164 |
| ENSG00000231776 | 1.130721746  | 0.033560493 |
| ENSG00000231817 | 2.175618346  | 0.019721371 |
| ENSG00000231824 | -1.599608306 | 0.000115565 |
| ENSG00000231873 | 1.131389909  | 0.010003634 |
| ENSG00000231881 | 1.21318331   | 0.007411615 |
| ENSG00000232001 | 2.868254309  | 0.0000528   |
| ENSG00000232006 | 1.95327793   | 0.00000843  |
| ENSG00000232018 | 1.419362866  | 0.038499073 |
| ENSG00000232023 | 1.636048732  | 0.0000818   |
| ENSG00000232109 | 1.688232581  | 0.045836455 |
| ENSG00000232175 | 1.181032351  | 0.023559898 |
| ENSG00000232212 | 1.898290986  | 0.000113944 |
| ENSG00000232216 | 2.391479718  | 1.94E-10    |
| ENSG00000232227 | 1.69401647   | 0.007014439 |
| ENSG00000232233 | 1.079802553  | 2.73E-08    |
| ENSG00000232353 | 2.393223899  | 0.00131137  |
| ENSG00000232527 | 1.073390898  | 0.00000383  |
| ENSG00000232624 | 1.152149469  | 0.032817336 |
| ENSG00000232667 | -1.088085482 | 0.000183036 |
| ENSG00000232680 | 1.841599214  | 0.0000091   |
| ENSG00000232699 | -1.088830909 | 0.000112767 |
| ENSG00000232727 | 1.08559955   | 0.007705889 |
| ENSG00000232756 | 2.270690824  | 0.0000652   |
| ENSG00000232759 | 1.002880316  | 0.0000162   |
| ENSG00000232765 | 1.835379713  | 0.001182098 |
| ENSG00000232903 | -1.411743538 | 0.003270549 |
| ENSG00000233018 | 1.134604941  | 0.018166407 |
| ENSG00000233085 | 1.188955077  | 0.008390289 |
| ENSG00000233098 | 1.225599796  | 0.000000966 |
| ENSG00000233125 | -1.678369062 | 0.000107025 |
| ENSG00000233214 | 2.194422463  | 7.52E-08    |
| ENSG00000233242 | 1.29895405   | 0.000117168 |
| ENSG00000233309 | 1.396359831  | 0.014881316 |
| ENSG00000233316 | 2.026766576  | 0.00446615  |
| ENSG00000233321 | 1.16787504   | 0.001788183 |
| ENSG00000233358 | 1.237905026  | 0.002518043 |
| ENSG00000233379 | 1.967451176  | 0.000132975 |
| ENSG00000233470 | 1.771597237  | 0.043111772 |
| ENSG00000233515 | 1.898582126  | 0.00705968  |
| ENSG00000233532 | 1.525018139  | 0.007499822 |
| ENSG00000233589 | 1.499220947  | 0.0000199   |
| ENSG00000233608 | -1.428117278 | 0.000000877 |
| ENSG00000233610 | 2.304046587  | 0.000000443 |
| ENSG00000233695 | -1.969405141 | 3.21E-24    |
| ENSG00000233708 | 1.205483342  | 0.00407349  |
| ENSG00000233723 | 1.407610798  | 0.000174034 |
| ENSG00000233732 | 1.465509858  | 0.016599047 |
| ENSG00000233828 | 2.508221883  | 0.001013869 |
| ENSG00000233854 | 2.404286507  | 0.000338839 |
| ENSG00000233920 | -1.161948037 | 0.012187112 |

|                 |              |             |
|-----------------|--------------|-------------|
| ENSG00000233922 | 1.764379265  | 0.000000227 |
| ENSG00000233928 | 1.485543901  | 0.038730497 |
| ENSG00000233936 | -2.196399606 | 0.002837484 |
| ENSG00000233974 | 1.024945623  | 0.001781327 |
| ENSG00000234008 | 1.834730879  | 0.001217868 |
| ENSG00000234068 | 2.419430015  | 0.001448001 |
| ENSG00000234223 | -1.710167945 | 0.001098435 |
| ENSG00000234264 | 1.306632593  | 0.0000259   |
| ENSG00000234311 | 1.995511638  | 0.0000141   |
| ENSG00000234352 | 2.04589442   | 0.000668536 |
| ENSG00000234402 | 2.166352535  | 0.015706846 |
| ENSG00000234423 | 1.161511517  | 0.00918383  |
| ENSG00000234426 | 1.445582867  | 0.04951665  |
| ENSG00000234493 | 2.132082566  | 0.006694144 |
| ENSG00000234506 | -1.229568502 | 0.0000996   |
| ENSG00000234569 | 1.329836928  | 0.044194567 |
| ENSG00000234617 | 1.190101463  | 0.0000013   |
| ENSG00000234629 | 1.467591721  | 0.021569249 |
| ENSG00000234695 | 1.27717794   | 0.005464149 |
| ENSG00000234710 | 1.911063172  | 0.033203708 |
| ENSG00000234722 | 1.354897372  | 0.023834117 |
| ENSG00000235054 | 2.112628988  | 0.004833951 |
| ENSG00000235056 | 1.45254191   | 0.046538646 |
| ENSG00000235205 | 1.474578914  | 0.028755972 |
| ENSG00000235277 | 1.772187328  | 0.023404175 |
| ENSG00000235295 | 1.216702442  | 0.000175091 |
| ENSG00000235330 | 1.379459056  | 0.00000127  |
| ENSG00000235335 | 1.349162753  | 0.000415893 |
| ENSG00000235343 | 2.383161439  | 0.003873433 |
| ENSG00000235350 | 1.151714237  | 0.026125454 |
| ENSG00000235356 | 1.853436723  | 0.010237175 |
| ENSG00000235436 | 1.05629686   | 0.018936621 |
| ENSG00000235493 | 1.661384256  | 0.00311614  |
| ENSG00000235494 | 1.819535543  | 0.00028344  |
| ENSG00000235584 | -1.092219773 | 0.045132682 |
| ENSG00000235626 | 1.093143077  | 0.022350251 |
| ENSG00000235643 | 2.234464316  | 2.14E-08    |
| ENSG00000235774 | 1.490613478  | 0.013920919 |
| ENSG00000235994 | 1.29081165   | 0.017516351 |
| ENSG00000236053 | -1.205124792 | 0.001120236 |
| ENSG00000236056 | 1.88752731   | 7.15E-12    |
| ENSG00000236268 | 1.354723207  | 0.0000482   |
| ENSG00000236279 | 2.353736166  | 0.0000018   |
| ENSG00000236348 | 1.230131609  | 0.000398921 |
| ENSG00000236366 | 1.02153396   | 0.031680821 |
| ENSG00000236424 | 2.69334724   | 0.013858747 |
| ENSG00000236446 | 1.82016166   | 0.007912765 |
| ENSG00000236494 | 1.167447175  | 0.000302409 |
| ENSG00000236516 | 1.813384891  | 0.008310129 |
| ENSG00000236648 | 2.203726878  | 0.033354194 |
| ENSG00000236763 | -1.189461008 | 3.7E-09     |
| ENSG00000236797 | -1.149806707 | 0.002625909 |
| ENSG00000236956 | 2.191607898  | 0.014393095 |
| ENSG00000236957 | 2.486786384  | 0.00000553  |
| ENSG00000237070 | -1.999253086 | 0.0000873   |
| ENSG00000237077 | 1.117238139  | 0.000807141 |
| ENSG00000237125 | -1.001251356 | 0.002543063 |
| ENSG00000237206 | 2.153909947  | 0.045054081 |

|                 |              |             |
|-----------------|--------------|-------------|
| ENSG00000237208 | 1.476931932  | 0.020058782 |
| ENSG00000237327 | -1.889494571 | 0.000141491 |
| ENSG00000237361 | -1.006512351 | 0.00000735  |
| ENSG00000237438 | 1.831531412  | 0.00000123  |
| ENSG00000237510 | 1.604169447  | 0.0000733   |
| ENSG00000237517 | -1.097880855 | 0.0000798   |
| ENSG00000237617 | 1.294458327  | 0.017363708 |
| ENSG00000237643 | 2.558756698  | 9.04E-09    |
| ENSG00000237653 | 2.073169866  | 0.007520237 |
| ENSG00000237713 | 1.628866057  | 0.047650855 |
| ENSG00000237870 | 1.132247491  | 0.000164429 |
| ENSG00000237949 | -1.154024927 | 0.001977599 |
| ENSG00000237961 | -1.187397475 | 0.010944321 |
| ENSG00000237978 | 1.28225751   | 0.0000354   |
| ENSG00000238009 | 1.086514855  | 0.0044946   |
| ENSG00000238024 | 1.356272725  | 0.000255923 |
| ENSG00000238033 | 3.51823661   | 0.00000161  |
| ENSG00000238074 | 2.829101042  | 0.009007791 |
| ENSG00000238086 | 1.141693472  | 0.0000672   |
| ENSG00000238118 | 1.763628495  | 0.048031735 |
| ENSG00000238132 | 1.062555484  | 0.00039029  |
| ENSG00000238171 | 1.052370103  | 0.0000225   |
| ENSG00000238268 | -1.009922476 | 0.00026614  |
| ENSG00000238840 | 1.806108281  | 0.00000606  |
| ENSG00000239148 | 1.719904143  | 0.001396129 |
| ENSG00000239311 | 2.127919137  | 0.040094089 |
| ENSG00000239440 | 2.233742472  | 0.000720042 |
| ENSG00000239572 | 2.133328588  | 0.000194115 |
| ENSG00000239589 | 1.994908757  | 0.022368842 |
| ENSG00000239839 | -1.070731414 | 0.037846495 |
| ENSG00000239951 | 1.229480348  | 0.000708216 |
| ENSG00000240040 | 1.094417476  | 0.0472646   |
| ENSG00000240216 | 1.02070599   | 0.000216411 |
| ENSG00000240241 | 1.54843794   | 0.033391326 |
| ENSG00000240280 | 1.406060593  | 0.001061787 |
| ENSG00000240298 | 1.198128841  | 0.018868212 |
| ENSG00000240405 | 1.724718034  | 0.0001062   |
| ENSG00000240423 | 1.258417284  | 0.015172957 |
| ENSG00000240476 | 1.024025376  | 0.026065336 |
| ENSG00000240497 | 1.209471785  | 0.006760717 |
| ENSG00000240661 | 1.644106477  | 0.000953407 |
| ENSG00000240922 | 1.849936427  | 0.005400643 |
| ENSG00000240990 | 1.800962478  | 0.000000132 |
| ENSG00000241155 | 1.043188107  | 0.001409587 |
| ENSG00000241168 | 2.239941513  | 0.011567579 |
| ENSG00000241224 | -1.083185292 | 0.001313283 |
| ENSG00000241351 | 1.019552261  | 0.00863093  |
| ENSG00000241361 | 2.047117443  | 0.0000929   |
| ENSG00000241369 | 1.353180043  | 0.004079938 |
| ENSG00000241469 | 1.503794498  | 0.002019461 |
| ENSG00000241472 | 1.076899706  | 0.000000455 |
| ENSG00000241475 | 2.070341417  | 0.001618918 |
| ENSG00000241476 | 1.414163589  | 0.034148306 |
| ENSG00000241644 | -1.347207725 | 5.45E-10    |
| ENSG00000241767 | 2.216628851  | 0.003672538 |
| ENSG00000242173 | -1.037451659 | 0.003296417 |
| ENSG00000242366 | 1.372297072  | 0.000000707 |
| ENSG00000242440 | 3.153669553  | 0.00000048  |



|                 |              |             |
|-----------------|--------------|-------------|
| ENSG00000242512 | 1.274746262  | 0.045755172 |
| ENSG00000242520 | 1.733463467  | 0.008827729 |
| ENSG00000242575 | 3.355946607  | 0.000000547 |
| ENSG00000242766 | 1.260457674  | 0.024223362 |
| ENSG00000242781 | 1.787144513  | 0.000460185 |
| ENSG00000242791 | 1.025422606  | 0.0000382   |
| ENSG00000242828 | 1.477240764  | 0.004518087 |
| ENSG00000242911 | 1.83645216   | 0.041876144 |
| ENSG00000243007 | -1.05021203  | 0.0000116   |
| ENSG00000243144 | 1.170229526  | 0.001855948 |
| ENSG00000243349 | 1.30770705   | 0.003260205 |
| ENSG00000243466 | 1.291184954  | 0.000522734 |
| ENSG00000243478 | -1.131329952 | 0.0000119   |
| ENSG00000243500 | 1.494861415  | 0.00372235  |
| ENSG00000243583 | 1.05918353   | 0.048902363 |
| ENSG00000243636 | -1.039095931 | 0.000347559 |
| ENSG00000243709 | 1.322098422  | 0.00000324  |
| ENSG00000243810 | 2.33374593   | 0.00000193  |
| ENSG00000243995 | 2.475497341  | 0.00307746  |
| ENSG00000244048 | 1.988768545  | 0.000278984 |
| ENSG00000244122 | 1.293749288  | 0.0000048   |
| ENSG00000244157 | 2.384516134  | 0.000000908 |
| ENSG00000244411 | 1.009837533  | 0.005972981 |
| ENSG00000244437 | 1.077557565  | 0.007444818 |
| ENSG00000244676 | 1.30470495   | 0.000184902 |
| ENSG00000244681 | 1.12694309   | 0.008026758 |
| ENSG00000244694 | -3.132201158 | 1.39E-36    |
| ENSG00000244791 | 1.773069378  | 0.005498604 |
| ENSG00000245293 | -1.101369835 | 0.000000159 |
| ENSG00000245662 | 1.88068018   | 0.000161293 |
| ENSG00000246228 | 1.234673838  | 0.000597856 |
| ENSG00000246350 | 1.014421706  | 0.003037386 |
| ENSG00000246465 | 1.571619736  | 3.65E-08    |
| ENSG00000246876 | 1.179844711  | 0.007533179 |
| ENSG00000247151 | 1.083795296  | 8.26E-10    |
| ENSG00000247157 | -1.124479447 | 3.34E-08    |
| ENSG00000247228 | 1.508024011  | 0.015838665 |
| ENSG00000247345 | 1.752470829  | 0.008795797 |
| ENSG00000248050 | -1.924241843 | 3.74E-12    |
| ENSG00000248103 | 1.055744878  | 0.038188173 |
| ENSG00000248131 | 1.250191129  | 0.028296077 |
| ENSG00000248215 | 3.655390953  | 3.99E-09    |
| ENSG00000248268 | 2.174076973  | 0.0000404   |
| ENSG00000248319 | -1.212921299 | 0.00129416  |
| ENSG00000248371 | 1.301487303  | 0.042780498 |
| ENSG00000248475 | 3.148444852  | 4.13E-08    |
| ENSG00000248491 | 1.796142475  | 0.002757716 |
| ENSG00000248510 | 1.429618294  | 0.039272495 |
| ENSG00000248530 | 1.405166001  | 0.000028    |
| ENSG00000248550 | 1.345341638  | 0.012006536 |
| ENSG00000248583 | -1.921327728 | 0.00000253  |
| ENSG00000248635 | 1.526808542  | 0.00000044  |
| ENSG00000248709 | -1.149594982 | 0.000065    |
| ENSG00000248762 | 2.167697451  | 0.006580393 |
| ENSG00000248780 | 1.032052815  | 0.007918407 |
| ENSG00000248783 | 1.209506815  | 0.025664476 |
| ENSG00000248817 | 1.325136895  | 0.005909957 |
| ENSG00000248827 | -1.115956229 | 0.020952118 |

|                 |              |             |
|-----------------|--------------|-------------|
| ENSG00000248874 | 1.365811593  | 0.009420552 |
| ENSG00000248964 | 1.025618989  | 0.01218694  |
| ENSG00000248973 | 2.752579836  | 0.0000249   |
| ENSG00000248975 | 1.920538564  | 0.006682673 |
| ENSG00000248998 | 1.40640756   | 0.000451994 |
| ENSG00000249001 | 1.333727394  | 0.000620695 |
| ENSG00000249006 | -1.4834234   | 0.002980019 |
| ENSG00000249028 | 1.021624567  | 0.015755608 |
| ENSG00000249053 | 1.562321739  | 0.034250583 |
| ENSG00000249125 | 1.219978422  | 0.016714245 |
| ENSG00000249173 | -1.308350465 | 0.0000585   |
| ENSG00000249174 | 1.680813647  | 0.038300161 |
| ENSG00000249196 | 2.383298553  | 0.000293819 |
| ENSG00000249378 | 1.357522574  | 0.006246168 |
| ENSG00000249396 | 1.56569414   | 0.040713374 |
| ENSG00000249463 | 1.32150125   | 0.00259623  |
| ENSG00000249626 | 1.017726984  | 0.000000771 |
| ENSG00000249631 | 1.49511393   | 0.00000925  |
| ENSG00000249797 | 1.224941515  | 0.001157402 |
| ENSG00000249917 | 1.473055352  | 0.032844005 |
| ENSG00000249942 | 1.682230827  | 0.001137194 |
| ENSG00000250038 | 1.405652041  | 0.042461547 |
| ENSG00000250060 | 1.36608961   | 0.021214789 |
| ENSG00000250125 | -2.066846392 | 0.002086323 |
| ENSG00000250261 | 2.178769228  | 0.010003634 |
| ENSG00000250284 | 1.471558978  | 0.011152765 |
| ENSG00000250337 | -1.480964865 | 5.66E-08    |
| ENSG00000250413 | -1.206000061 | 0.00000116  |
| ENSG00000250420 | 1.485607819  | 0.013314897 |
| ENSG00000250447 | 1.712686712  | 0.007655877 |
| ENSG00000250476 | 1.429685752  | 0.002284703 |
| ENSG00000250486 | 1.044236417  | 0.000359718 |
| ENSG00000250519 | 1.050223748  | 0.000544368 |
| ENSG00000250546 | 2.449261056  | 0.000149152 |
| ENSG00000250563 | 2.20603487   | 0.000965917 |
| ENSG00000250584 | 1.359525586  | 0.017587026 |
| ENSG00000250590 | 1.462811219  | 0.011787411 |
| ENSG00000250735 | 2.488476063  | 0.00000261  |
| ENSG00000250771 | 1.305473626  | 0.00000418  |
| ENSG00000250775 | 1.43506519   | 0.015401239 |
| ENSG00000250838 | 1.745749062  | 0.014679102 |
| ENSG00000250846 | 2.057799412  | 0.034984594 |
| ENSG00000250974 | 1.260379344  | 0.033118244 |
| ENSG00000251003 | 1.150610681  | 0.000303544 |
| ENSG00000251049 | -2.707478505 | 0.001812258 |
| ENSG00000251095 | -1.33419894  | 0.002115094 |
| ENSG00000251112 | 1.440714257  | 0.026969222 |
| ENSG00000251127 | 1.966961412  | 0.001140451 |
| ENSG00000251139 | -1.3218624   | 0.000000609 |
| ENSG00000251185 | 1.69422897   | 0.006069066 |
| ENSG00000251226 | 1.039998539  | 0.02848022  |
| ENSG00000251258 | 1.411548197  | 0.023302886 |
| ENSG00000251273 | 1.716966746  | 0.003296261 |
| ENSG00000251292 | -1.184718951 | 0.007923249 |
| ENSG00000251301 | 1.068112253  | 0.001666076 |
| ENSG00000251350 | 1.170278042  | 0.00026156  |
| ENSG00000251361 | 2.043395144  | 0.00000133  |
| ENSG00000251363 | 1.053121816  | 0.034266328 |

|                 |              |             |
|-----------------|--------------|-------------|
| ENSG00000251381 | 3.140836828  | 6.72E-10    |
| ENSG00000251410 | 1.698247759  | 0.035649775 |
| ENSG00000251490 | 1.752264947  | 0.01235689  |
| ENSG00000251493 | 1.234669622  | 0.000293037 |
| ENSG00000251504 | 1.390463742  | 0.000207419 |
| ENSG00000251518 | -1.634863943 | 0.005562098 |
| ENSG00000251529 | 1.214412512  | 0.017997075 |
| ENSG00000251550 | 1.003534921  | 0.003019279 |
| ENSG00000251598 | 1.142396373  | 0.003687574 |
| ENSG00000251630 | -3.189723689 | 5.39E-13    |
| ENSG00000251654 | 1.588377052  | 0.022473746 |
| ENSG00000251676 | 2.570719704  | 0.0000752   |
| ENSG00000251985 | 1.599989825  | 0.003613951 |
| ENSG00000252355 | 1.052401454  | 0.000254755 |
| ENSG00000252984 | 1.063694852  | 0.003794282 |
| ENSG00000253147 | -1.373463239 | 0.0251556   |
| ENSG00000253227 | 1.696732255  | 0.0000156   |
| ENSG00000253250 | 1.06913295   | 0.0000646   |
| ENSG00000253317 | 1.069226927  | 0.00849923  |
| ENSG00000253361 | 1.29545714   | 0.029042483 |
| ENSG00000253363 | 1.28245241   | 0.023993657 |
| ENSG00000253368 | 1.323683277  | 4.42E-08    |
| ENSG00000253369 | -1.784664366 | 0.033048259 |
| ENSG00000253376 | 2.180570936  | 0.001837459 |
| ENSG00000253379 | 1.1516556    | 0.001502726 |
| ENSG00000253417 | 1.709986425  | 0.0000576   |
| ENSG00000253467 | 1.518583004  | 0.006168544 |
| ENSG00000253497 | 1.480036408  | 0.020791544 |
| ENSG00000253499 | 2.202454994  | 0.025891698 |
| ENSG00000253500 | 2.162709147  | 0.00019717  |
| ENSG00000253553 | 1.599989542  | 0.010484508 |
| ENSG00000253554 | 1.998362908  | 0.006461024 |
| ENSG00000253569 | 2.578267705  | 0.00000647  |
| ENSG00000253583 | 1.708547173  | 0.00777855  |
| ENSG00000253633 | 2.036358208  | 9.49E-08    |
| ENSG00000253642 | 2.338034186  | 0.000105976 |
| ENSG00000253659 | 2.04652119   | 0.0000739   |
| ENSG00000253661 | 1.435614131  | 0.00000225  |
| ENSG00000253665 | 1.162574284  | 0.047920082 |
| ENSG00000253706 | 2.279343585  | 0.0000208   |
| ENSG00000253737 | 1.081245488  | 0.009394484 |
| ENSG00000253764 | -1.043514118 | 0.006666973 |
| ENSG00000253802 | 2.003396719  | 0.033341023 |
| ENSG00000253895 | 1.429552533  | 0.02343226  |
| ENSG00000253898 | 2.029138114  | 0.000173581 |
| ENSG00000253910 | -1.0471128   | 0.0000111   |
| ENSG00000253957 | 1.408015892  | 0.010090627 |
| ENSG00000253974 | 1.862901337  | 0.001025086 |
| ENSG00000253981 | 1.140603761  | 0.0000291   |
| ENSG00000254027 | 1.024337536  | 0.0000442   |
| ENSG00000254092 | -1.049214895 | 0.044441389 |
| ENSG00000254100 | 2.00451854   | 0.001092958 |
| ENSG00000254119 | 1.28292067   | 0.009757535 |
| ENSG00000254126 | 1.180869511  | 0.015410846 |
| ENSG00000254174 | 1.204639542  | 0.02310751  |
| ENSG00000254208 | 1.191286156  | 0.000201122 |
| ENSG00000254245 | -1.172724446 | 0.0000919   |
| ENSG00000254260 | -1.723496226 | 0.007433898 |

|                 |              |             |
|-----------------|--------------|-------------|
| ENSG00000254266 | 1.14577411   | 0.017516351 |
| ENSG00000254302 | 2.294952041  | 0.000323903 |
| ENSG00000254326 | 1.285580802  | 0.044863639 |
| ENSG00000254395 | 1.024302528  | 0.022923183 |
| ENSG00000254399 | -1.124863073 | 0.003252165 |
| ENSG00000254475 | 1.289243905  | 0.029840092 |
| ENSG00000254528 | -1.535734334 | 7.3E-09     |
| ENSG00000254545 | 1.288448302  | 0.004486445 |
| ENSG00000254560 | 1.622784939  | 0.0000917   |
| ENSG00000254572 | -1.252144583 | 0.003947658 |
| ENSG00000254608 | -1.137852053 | 0.016714735 |
| ENSG00000254656 | 1.491367219  | 0.001701952 |
| ENSG00000254695 | -2.387829915 | 0.000000104 |
| ENSG00000254709 | 1.377493531  | 0.000121874 |
| ENSG00000254722 | 1.362418684  | 0.03919798  |
| ENSG00000254872 | -1.116770026 | 0.000838973 |
| ENSG00000254981 | 1.053227165  | 0.036255466 |
| ENSG00000254998 | 1.242767256  | 0.004586325 |
| ENSG00000255026 | -1.447436884 | 0.000000138 |
| ENSG00000255065 | 2.188722192  | 0.021327909 |
| ENSG00000255071 | -1.459011323 | 0.0000716   |
| ENSG00000255094 | 1.243334604  | 0.00421089  |
| ENSG00000255239 | -1.123615942 | 0.002402441 |
| ENSG00000255243 | -1.8024742   | 0.003332116 |
| ENSG00000255257 | 1.41256054   | 0.026405863 |
| ENSG00000255282 | 1.165745841  | 0.000752501 |
| ENSG00000255293 | 1.489598136  | 0.010530804 |
| ENSG00000255327 | 2.02250575   | 0.039946434 |
| ENSG00000255395 | 1.392142224  | 0.00034897  |
| ENSG00000255446 | 1.051160465  | 0.002378633 |
| ENSG00000255501 | 1.489745114  | 0.002220284 |
| ENSG00000255583 | 2.213753331  | 0.000609326 |
| ENSG00000255595 | 1.865051251  | 0.012011415 |
| ENSG00000255624 | 1.23630233   | 6.84E-08    |
| ENSG00000255649 | 1.239073871  | 0.037939667 |
| ENSG00000255874 | 1.046097855  | 0.000000337 |
| ENSG00000255910 | -1.466264704 | 0.002954156 |
| ENSG00000255921 | 1.424846472  | 0.017058159 |
| ENSG00000255983 | 1.594527839  | 0.004127282 |
| ENSG00000255986 | -1.025635759 | 0.031199051 |
| ENSG00000256020 | 1.044236441  | 0.00288943  |
| ENSG00000256084 | 1.07595672   | 0.002414793 |
| ENSG00000256115 | 1.366339262  | 0.00592236  |
| ENSG00000256124 | 1.247710686  | 0.0000443   |
| ENSG00000256128 | 1.268369759  | 0.00000652  |
| ENSG00000256164 | -1.06736397  | 0.001343533 |
| ENSG00000256229 | 1.04564812   | 0.000000116 |
| ENSG00000256287 | -1.181126365 | 0.03197806  |
| ENSG00000256310 | 2.374041924  | 0.002846487 |
| ENSG00000256312 | -1.180695291 | 0.023759091 |
| ENSG00000256417 | 1.329819036  | 0.015991004 |
| ENSG00000256427 | -1.059779001 | 0.000302366 |
| ENSG00000256811 | -1.706085033 | 4.71E-08    |
| ENSG00000256849 | -1.218716195 | 0.003148522 |
| ENSG00000256925 | -1.919108952 | 0.007905403 |
| ENSG00000256944 | -1.331256397 | 0.011098328 |
| ENSG00000256969 | -2.064095622 | 0.00000118  |
| ENSG00000256980 | 3.473558772  | 7.61E-10    |

|                 |              |             |
|-----------------|--------------|-------------|
| ENSG00000257017 | -1.117228377 | 0.00000174  |
| ENSG00000257114 | 1.032076955  | 0.012742663 |
| ENSG00000257185 | 1.867594152  | 0.0000645   |
| ENSG00000257191 | 1.036416915  | 0.01612283  |
| ENSG00000257194 | 1.291803218  | 0.008091794 |
| ENSG00000257302 | 1.103003497  | 0.035482635 |
| ENSG00000257452 | 1.261453387  | 0.011393874 |
| ENSG00000257501 | 1.40977129   | 0.0000448   |
| ENSG00000257599 | -1.1265547   | 0.0000644   |
| ENSG00000257611 | 1.190727624  | 0.009028261 |
| ENSG00000257636 | 1.280451582  | 0.037387545 |
| ENSG00000257732 | 1.321821458  | 0.000291862 |
| ENSG00000257817 | -1.349144988 | 0.0000699   |
| ENSG00000257842 | 1.6045668    | 0.000353286 |
| ENSG00000257863 | 1.261904208  | 0.046014749 |
| ENSG00000257924 | 1.070098533  | 0.0042248   |
| ENSG00000257943 | -1.285597912 | 0.008315185 |
| ENSG00000258028 | 1.430898249  | 0.006813002 |
| ENSG00000258038 | 1.594389397  | 0.002568084 |
| ENSG00000258053 | 1.856355044  | 0.000000721 |
| ENSG00000258065 | 1.741165371  | 0.002226876 |
| ENSG00000258116 | 1.166628366  | 0.000423088 |
| ENSG00000258123 | 1.12909957   | 0.044988914 |
| ENSG00000258128 | 2.16606161   | 0.0000249   |
| ENSG00000258162 | 1.588252951  | 0.026756604 |
| ENSG00000258168 | 1.020232488  | 0.0000419   |
| ENSG00000258172 | 1.361256259  | 0.00000848  |
| ENSG00000258227 | 1.058404801  | 0.0000323   |
| ENSG00000258240 | 2.176644121  | 0.00000484  |
| ENSG00000258285 | -1.255234424 | 0.00076204  |
| ENSG00000258312 | 1.635645293  | 0.020156414 |
| ENSG00000258314 | 1.287864784  | 0.006975431 |
| ENSG00000258390 | 1.242561109  | 0.009556465 |
| ENSG00000258399 | 1.074675307  | 0.011571819 |
| ENSG00000258460 | -1.029419338 | 0.000624549 |
| ENSG00000258474 | 1.095256748  | 0.000299064 |
| ENSG00000258479 | 1.485955275  | 0.000000121 |
| ENSG00000258498 | -1.488022249 | 0.0000041   |
| ENSG00000258531 | -1.305263766 | 0.001387721 |
| ENSG00000258592 | 1.690437193  | 0.003476277 |
| ENSG00000258689 | 1.202474541  | 0.000134082 |
| ENSG00000258743 | 1.524677056  | 0.013165981 |
| ENSG00000258748 | -1.1782449   | 0.005356344 |
| ENSG00000258754 | 1.480704118  | 0.005204528 |
| ENSG00000258760 | 1.297812679  | 0.007039064 |
| ENSG00000258763 | 2.401555681  | 0.0000139   |
| ENSG00000258777 | 1.123470461  | 0.0000226   |
| ENSG00000258791 | 1.467280543  | 0.000175032 |
| ENSG00000258815 | 1.441379106  | 0.005589559 |
| ENSG00000258837 | 1.233518917  | 0.011498864 |
| ENSG00000258847 | -2.005439282 | 0.000000737 |
| ENSG00000258873 | 2.121434645  | 0.008848276 |
| ENSG00000258927 | 1.703847551  | 0.000825829 |
| ENSG00000258932 | 1.461668453  | 0.002636676 |
| ENSG00000258942 | 1.165691817  | 0.00242297  |
| ENSG00000258955 | 1.882239342  | 1.53E-09    |
| ENSG00000258992 | 2.547358177  | 0.018349753 |
| ENSG00000258998 | 1.736275452  | 0.020564035 |

|                 |              |             |
|-----------------|--------------|-------------|
| ENSG00000259040 | -1.105578124 | 0.0000069   |
| ENSG00000259078 | 1.063098522  | 0.000843215 |
| ENSG00000259129 | 1.772478661  | 0.002260243 |
| ENSG00000259166 | -1.550488263 | 0.045938618 |
| ENSG00000259225 | 1.184765856  | 0.00000504  |
| ENSG00000259230 | 1.32214805   | 0.000144993 |
| ENSG00000259240 | 1.497493298  | 0.002587882 |
| ENSG00000259306 | 1.843063723  | 0.006688213 |
| ENSG00000259345 | 1.092886138  | 0.0000532   |
| ENSG00000259430 | 1.284250756  | 0.007041439 |
| ENSG00000259436 | 1.387313888  | 0.00000616  |
| ENSG00000259485 | 2.460323738  | 0.00000374  |
| ENSG00000259514 | 1.757168996  | 0.001883529 |
| ENSG00000259518 | 1.817675395  | 0.000102215 |
| ENSG00000259610 | 1.041823445  | 0.04883079  |
| ENSG00000259616 | 1.181691094  | 0.000880579 |
| ENSG00000259675 | 1.474697782  | 0.00517186  |
| ENSG00000259692 | 1.656942358  | 0.000352778 |
| ENSG00000259712 | 1.305130626  | 0.00000634  |
| ENSG00000259742 | -1.262446161 | 0.011788127 |
| ENSG00000259755 | 1.575217426  | 0.00000124  |
| ENSG00000259760 | 1.163126287  | 0.000732613 |
| ENSG00000259786 | 1.205040431  | 0.018207375 |
| ENSG00000259831 | -1.001468084 | 0.047967326 |
| ENSG00000259848 | 1.33925075   | 0.010110036 |
| ENSG00000259863 | -1.279776728 | 0.000000575 |
| ENSG00000259868 | 1.16594132   | 0.002055146 |
| ENSG00000259881 | -1.656457477 | 0.000000558 |
| ENSG00000259905 | -1.118370653 | 0.01712706  |
| ENSG00000259995 | 1.401056835  | 0.017577892 |
| ENSG00000260019 | 2.254409467  | 0.001712359 |
| ENSG00000260123 | 1.06510559   | 0.003110938 |
| ENSG00000260167 | 1.008877883  | 1.59E-08    |
| ENSG00000260246 | -1.373785031 | 0.015255011 |
| ENSG00000260265 | 1.807249329  | 0.000151154 |
| ENSG00000260289 | 1.524703527  | 0.001938568 |
| ENSG00000260403 | -1.157890991 | 0.026293314 |
| ENSG00000260484 | -2.599413944 | 0.002625194 |
| ENSG00000260611 | 1.936831716  | 0.035201361 |
| ENSG00000260636 | 1.221420188  | 0.001886969 |
| ENSG00000260664 | 1.040682653  | 0.01473354  |
| ENSG00000260677 | 1.369876102  | 0.005354372 |
| ENSG00000260761 | 1.884398448  | 0.003695911 |
| ENSG00000260763 | 3.073111402  | 1.11E-09    |
| ENSG00000260777 | 1.164528784  | 0.000338169 |
| ENSG00000260868 | 1.015829371  | 0.000514211 |
| ENSG00000260877 | 1.036664006  | 0.04358971  |
| ENSG00000260913 | 1.759935358  | 0.04167042  |
| ENSG00000260930 | 1.528111498  | 0.00761809  |
| ENSG00000260951 | -2.329694901 | 0.001769334 |
| ENSG00000260989 | 1.314538439  | 0.000334044 |
| ENSG00000261033 | -1.444564213 | 0.000816273 |
| ENSG00000261055 | 1.205812392  | 0.002290816 |
| ENSG00000261122 | 2.088818494  | 0.00424873  |
| ENSG00000261127 | 2.141669937  | 0.019958812 |
| ENSG00000261209 | 1.268697263  | 0.001077842 |
| ENSG00000261239 | 2.583419747  | 0.000326931 |
| ENSG00000261319 | 1.521967317  | 0.00000367  |

|                 |              |             |
|-----------------|--------------|-------------|
| ENSG00000261334 | 1.001855575  | 0.003231505 |
| ENSG00000261341 | 1.013422576  | 0.0000388   |
| ENSG00000261446 | 1.367820296  | 0.021002859 |
| ENSG00000261488 | 1.301313701  | 0.001621567 |
| ENSG00000261502 | 1.424996045  | 0.047757421 |
| ENSG00000261514 | 1.172637011  | 0.033395783 |
| ENSG00000261520 | 1.768482199  | 0.017430317 |
| ENSG00000261588 | 1.053436227  | 0.000000867 |
| ENSG00000261642 | 1.732437681  | 0.017907102 |
| ENSG00000261672 | -1.319979969 | 0.008418761 |
| ENSG00000261685 | -1.302278077 | 0.0000665   |
| ENSG00000261758 | 1.089226671  | 0.0000148   |
| ENSG00000261760 | 1.028033838  | 0.008848276 |
| ENSG00000261761 | 1.595180927  | 0.005217423 |
| ENSG00000261787 | 1.640743241  | 0.001406476 |
| ENSG00000261857 | 1.008786247  | 0.0000099   |
| ENSG00000261949 | 1.784374301  | 0.00000794  |
| ENSG00000262074 | 1.760025382  | 0.000000412 |
| ENSG00000262267 | 1.256433617  | 0.025188025 |
| ENSG00000263167 | -1.351969173 | 0.000749251 |
| ENSG00000263508 | -1.230760718 | 0.00000021  |
| ENSG00000263551 | 1.732590343  | 0.000084    |
| ENSG00000263567 | 1.99030625   | 0.025392267 |
| ENSG00000263612 | 1.04387324   | 0.001611212 |
| ENSG00000263639 | 1.145560556  | 0.00041624  |
| ENSG00000263680 | 1.17340796   | 0.000932719 |
| ENSG00000263692 | 1.11437438   | 0.013693881 |
| ENSG00000263711 | 1.160006884  | 0.034358629 |
| ENSG00000263745 | 1.646342235  | 0.0000128   |
| ENSG00000263761 | -1.812696704 | 0.003852991 |
| ENSG00000263961 | 1.279610047  | 0.0000343   |
| ENSG00000264026 | 1.161772483  | 0.013165981 |
| ENSG00000264151 | 1.79178404   | 0.004809815 |
| ENSG00000264222 | -2.627374144 | 2.75E-10    |
| ENSG00000264424 | -3.685503981 | 1.4E-11     |
| ENSG00000264453 | 1.03751293   | 0.012967584 |
| ENSG00000264734 | 2.820869764  | 0.00549883  |
| ENSG00000264769 | 1.183573574  | 0.00000287  |
| ENSG00000264785 | -1.515894976 | 0.005869591 |
| ENSG00000264845 | 1.736658032  | 0.003982905 |
| ENSG00000264956 | 1.447132898  | 0.028529983 |
| ENSG00000265185 | 1.409352966  | 0.00000796  |
| ENSG00000265190 | 1.058478662  | 0.003365452 |
| ENSG00000265243 | 1.508531985  | 0.001864527 |
| ENSG00000265417 | 1.023780162  | 0.005895382 |
| ENSG00000265531 | 1.024176142  | 0.0000518   |
| ENSG00000265717 | 1.5210981    | 0.000856958 |
| ENSG00000265766 | 1.212070352  | 0.000728129 |
| ENSG00000265843 | 3.011145746  | 0.000313622 |
| ENSG00000265933 | 1.680496555  | 0.001199086 |
| ENSG00000265980 | 1.530923989  | 0.037625361 |
| ENSG00000266014 | 1.497214713  | 0.006716383 |
| ENSG00000266049 | 1.616147601  | 0.005692829 |
| ENSG00000266369 | 2.677873581  | 0.0000395   |
| ENSG00000266401 | 1.78306437   | 0.000321209 |
| ENSG00000266446 | 1.542759917  | 0.000000104 |
| ENSG00000266479 | 1.588565321  | 0.000186706 |
| ENSG00000266524 | 1.11043603   | 0.01122045  |

|                 |              |             |
|-----------------|--------------|-------------|
| ENSG00000266547 | -1.788180901 | 0.0000153   |
| ENSG00000266560 | 1.384561978  | 0.000606123 |
| ENSG00000266729 | 1.624169787  | 0.002269343 |
| ENSG00000266743 | 2.037208787  | 0.000193267 |
| ENSG00000266835 | -1.467103717 | 2.47E-08    |
| ENSG00000266869 | 2.207586325  | 0.000290942 |
| ENSG00000266885 | 1.579025491  | 0.000589517 |
| ENSG00000267013 | 2.117657519  | 3.66E-12    |
| ENSG00000267015 | 1.459232096  | 0.001230863 |
| ENSG00000267034 | 1.033941311  | 0.00798772  |
| ENSG00000267057 | 1.981327479  | 0.00000693  |
| ENSG00000267250 | -1.101627644 | 0.001613362 |
| ENSG00000267260 | 1.950111601  | 1.13E-11    |
| ENSG00000267284 | 1.79581553   | 0.008241027 |
| ENSG00000267313 | 1.093312638  | 0.043139161 |
| ENSG00000267327 | 1.765433148  | 0.00111027  |
| ENSG00000267339 | -1.104702938 | 0.009757535 |
| ENSG00000267374 | 1.231152718  | 0.0000258   |
| ENSG00000267412 | -1.37975727  | 0.000000694 |
| ENSG00000267413 | 1.092830137  | 0.030817292 |
| ENSG00000267453 | -1.493428268 | 0.008481088 |
| ENSG00000267528 | -1.996542782 | 0.001431127 |
| ENSG00000267589 | -1.077884551 | 0.003941931 |
| ENSG00000267640 | 1.02016421   | 0.001119955 |
| ENSG00000267653 | -1.018069278 | 0.011191173 |
| ENSG00000267654 | 1.662895883  | 0.00000404  |
| ENSG00000267670 | 1.924555167  | 0.0000752   |
| ENSG00000267674 | -1.047809681 | 0.021498874 |
| ENSG00000267712 | 1.240424531  | 0.013374699 |
| ENSG00000267714 | 1.206413882  | 0.00951568  |
| ENSG00000267733 | 1.071359828  | 0.001202044 |
| ENSG00000267922 | 1.044316998  | 0.029800674 |
| ENSG00000267978 | 3.320778321  | 0.000365294 |
| ENSG00000268080 | 1.025702393  | 0.038896892 |
| ENSG00000268088 | 2.067051278  | 0.0000597   |
| ENSG00000268089 | 1.656180859  | 2.84E-13    |
| ENSG00000268119 | 1.062806739  | 0.0000618   |
| ENSG00000268560 | 1.268263552  | 0.046661729 |
| ENSG00000268606 | 1.353403556  | 0.02004172  |
| ENSG00000268621 | 2.034538472  | 0.000000885 |
| ENSG00000268658 | 1.294744685  | 0.00000469  |
| ENSG00000268660 | 1.415670279  | 0.0000503   |
| ENSG00000268696 | 1.375090358  | 0.044094128 |
| ENSG00000268756 | 1.181628323  | 1.41E-09    |
| ENSG00000268873 | -2.209403013 | 0.00000113  |
| ENSG00000268879 | 1.673925265  | 0.000459102 |
| ENSG00000268883 | -1.269860539 | 0.026926166 |
| ENSG00000268902 | 1.785251665  | 0.001576464 |
| ENSG00000268916 | 1.509129157  | 0.004598805 |
| ENSG00000268941 | 1.093861971  | 0.008824845 |
| ENSG00000268949 | 1.257948587  | 0.000000185 |
| ENSG00000269009 | 1.009645153  | 0.001607572 |
| ENSG00000269043 | 1.661324305  | 0.000035    |
| ENSG00000269055 | 1.620427323  | 0.014487997 |
| ENSG00000269072 | 1.049634566  | 0.0000143   |
| ENSG00000269289 | 1.780418897  | 0.00000098  |
| ENSG00000269373 | 1.145910102  | 0.021978903 |
| ENSG00000269416 | 1.30608188   | 0.000128793 |



|                 |              |             |
|-----------------|--------------|-------------|
| ENSG00000269526 | 2.141602869  | 0.003117096 |
| ENSG00000269761 | 1.386101207  | 0.02434177  |
| ENSG00000269802 | -1.36900048  | 0.001919547 |
| ENSG00000269959 | 1.064642979  | 0.007991631 |
| ENSG00000269964 | 1.143750654  | 0.008351824 |
| ENSG00000269970 | 1.081335294  | 0.0000917   |
| ENSG00000269976 | -1.018351901 | 0.00000664  |
| ENSG00000269986 | 1.963760571  | 0.009462842 |
| ENSG00000269994 | 2.258626675  | 0.00000209  |
| ENSG00000270036 | 1.112472963  | 0.026299032 |
| ENSG00000270038 | 1.566026048  | 0.003338358 |
| ENSG00000270321 | -1.893575648 | 0.004409671 |
| ENSG00000270326 | 1.113683623  | 0.000179226 |
| ENSG00000270533 | 1.565012597  | 0.0000915   |
| ENSG00000270550 | 1.19508119   | 0.002784493 |
| ENSG00000270720 | -1.028680276 | 1.87E-08    |
| ENSG00000270791 | 1.15943047   | 0.004340096 |
| ENSG00000271127 | 1.198895911  | 0.0000919   |
| ENSG00000271156 | 2.221167778  | 0.004385082 |
| ENSG00000271369 | 1.354519253  | 0.008397025 |
| ENSG00000271417 | 1.643447148  | 0.001970335 |
| ENSG00000271524 | 1.029853159  | 0.003456417 |
| ENSG00000271860 | 1.697441797  | 0.045256152 |
| ENSG00000271936 | 1.103517979  | 3.47E-13    |
| ENSG00000271989 | 1.03696127   | 0.01043392  |
| ENSG00000271992 | -1.284887926 | 2.81E-09    |
| ENSG00000272015 | -1.619233408 | 0.004518532 |
| ENSG00000272046 | 1.399820577  | 0.001543648 |
| ENSG00000272094 | 1.668180192  | 0.001528937 |
| ENSG00000272121 | 1.6412969    | 0.016827977 |
| ENSG00000272202 | 1.48487528   | 0.000501742 |
| ENSG00000272274 | -1.277970726 | 0.010375225 |
| ENSG00000272428 | 1.834143442  | 0.023996347 |
| ENSG00000272461 | 1.928618567  | 0.0000556   |
| ENSG00000272511 | -1.218282606 | 0.001060271 |
| ENSG00000272515 | 1.143654841  | 0.010653696 |
| ENSG00000272524 | 1.029162205  | 0.00000013  |
| ENSG00000272573 | 1.278158136  | 0.00000416  |
| ENSG00000272789 | -1.010820113 | 0.000000953 |
| ENSG00000272827 | 1.868429907  | 0.004037509 |
| ENSG00000272942 | 1.251822373  | 0.001005324 |
| ENSG00000273066 | 1.305642885  | 2.36E-09    |
| ENSG00000273102 | 1.138992824  | 0.0001991   |
| ENSG00000273203 | 1.593587798  | 0.0000841   |
| ENSG00000273209 | 2.142972243  | 7.75E-11    |
| ENSG00000273331 | 1.210349374  | 0.000278085 |
| ENSG00000273388 | 1.173445255  | 0.02242669  |
| ENSG00000273442 | 1.411782219  | 0.007571405 |
| ENSG00000273644 | 1.496128722  | 0.009349806 |
| ENSG00000273693 | 1.102015472  | 0.020696472 |
| ENSG00000273824 | 1.487966244  | 0.0000284   |
| ENSG00000273838 | 1.285253663  | 0.022448135 |
| ENSG00000273906 | 1.317489828  | 0.023002148 |
| ENSG00000274214 | -2.679578939 | 2.84E-13    |
| ENSG00000274358 | 1.325753034  | 0.002115792 |
| ENSG00000274391 | 1.572458099  | 0.027430267 |
| ENSG00000274443 | -1.10848182  | 0.00167285  |
| ENSG00000274461 | 1.269115622  | 0.00000634  |

|                 |              |             |
|-----------------|--------------|-------------|
| ENSG00000274827 | 2.042999682  | 0.001146165 |
| ENSG00000274840 | 1.330715755  | 0.01052467  |
| ENSG00000274956 | 1.882868877  | 0.000465708 |
| ENSG00000275016 | 1.6887442    | 0.03156434  |
| ENSG00000275149 | -1.111604154 | 0.0000915   |
| ENSG00000275216 | 2.92041255   | 0.000000195 |
| ENSG00000275228 | 1.117366799  | 0.014787349 |
| ENSG00000275395 | 1.318835516  | 3.19E-08    |
| ENSG00000275785 | 1.360166044  | 0.001127008 |
| ENSG00000275830 | -1.039976876 | 0.025422006 |
| ENSG00000275874 | 1.920638631  | 0.0000274   |
| ENSG00000275880 | -1.823684624 | 3.4E-14     |
| ENSG00000275896 | 3.968676417  | 2.4E-17     |
| ENSG00000276399 | 2.939804092  | 0.000000179 |
| ENSG00000276476 | 1.357358899  | 0.002264102 |
| ENSG00000276477 | -1.122396542 | 0.000187937 |
| ENSG00000276566 | 1.116024925  | 0.034694796 |
| ENSG00000276649 | 1.057086166  | 0.000000142 |
| ENSG00000276763 | 1.254320826  | 0.0000169   |
| ENSG00000277010 | -1.062527413 | 0.005622053 |
| ENSG00000277199 | -1.702347157 | 0.011739806 |
| ENSG00000277215 | 2.103773704  | 0.0000318   |
| ENSG00000277268 | 1.881664556  | 0.03021263  |
| ENSG00000277332 | 1.772400859  | 0.022355991 |
| ENSG00000277586 | 1.32871167   | 0.001893746 |
| ENSG00000277631 | -1.174077139 | 0.001126525 |
| ENSG00000277651 | -1.266646585 | 0.000296047 |
| ENSG00000277693 | 1.423744354  | 0.026915725 |
| ENSG00000277702 | 1.45945603   | 5.21E-08    |
| ENSG00000277738 | 2.557732914  | 0.0000164   |
| ENSG00000277893 | -1.00179991  | 0.000538428 |
| ENSG00000278095 | 1.115188575  | 0.00709989  |
| ENSG00000278200 | 1.10406629   | 0.023274475 |
| ENSG00000278318 | 1.105906748  | 0.000000406 |
| ENSG00000278518 | -1.345327756 | 0.00000284  |
| ENSG00000278530 | 1.35429399   | 0.010427217 |
| ENSG00000278531 | 2.097090462  | 0.030650028 |
| ENSG00000278594 | 1.186850213  | 0.0000233   |
| ENSG00000278599 | 1.434508724  | 0.002709186 |
| ENSG00000278928 | -1.384376655 | 0.047731954 |
| ENSG00000279003 | 1.457357915  | 0.019295637 |
| ENSG00000279017 | -1.22908802  | 0.045331837 |
| ENSG00000279032 | 1.597374132  | 0.003139307 |
| ENSG00000279039 | 1.101185589  | 0.001109346 |
| ENSG00000279106 | -1.204878263 | 0.001089461 |
| ENSG00000279138 | 1.378963212  | 1.46E-08    |
| ENSG00000279154 | 1.803304276  | 0.007263144 |
| ENSG00000279206 | 1.250903454  | 0.000157201 |
| ENSG00000279220 | 2.997390473  | 0.0000172   |
| ENSG00000279249 | -1.140299318 | 0.006647171 |
| ENSG00000279314 | 1.08453224   | 0.0000302   |
| ENSG00000279479 | 1.926499403  | 0.0000337   |
| ENSG00000279511 | 2.685846001  | 0.0000506   |
| ENSG00000279565 | 1.316107301  | 0.010695599 |
| ENSG00000279581 | 1.051549651  | 0.010907662 |
| ENSG00000279673 | 1.087217438  | 0.00000182  |
| ENSG00000279712 | 1.109087571  | 0.009028261 |
| ENSG00000279774 | -1.447850386 | 0.000263353 |

|                 |              |             |
|-----------------|--------------|-------------|
| ENSG00000279778 | 1.13753743   | 0.000607013 |
| ENSG00000279783 | 1.736242109  | 0.021569323 |
| ENSG00000279844 | 2.675888798  | 0.0000591   |
| ENSG00000279858 | -1.178394669 | 0.001254834 |
| ENSG00000279864 | 2.318674374  | 0.007431904 |
| ENSG00000279929 | 1.086312001  | 0.019042538 |
| ENSG00000280002 | 1.376054935  | 0.045643514 |
| ENSG00000280065 | 1.15317243   | 0.015041979 |
| ENSG00000280075 | 1.788634558  | 0.035856505 |
| ENSG00000280079 | 1.073542552  | 0.0000122   |
| ENSG00000280081 | 1.402315081  | 0.034213488 |
| ENSG00000280109 | -1.693455645 | 0.000842417 |
| ENSG00000280117 | 1.089803944  | 0.013039826 |
| ENSG00000280127 | -2.956964363 | 0.000159803 |
| ENSG00000280156 | 1.377228431  | 1.7E-11     |
| ENSG00000280180 | 3.063835284  | 0.0000011   |
| ENSG00000280217 | -1.469567673 | 0.003338708 |
| ENSG00000280241 | 1.169252312  | 0.039568131 |
| ENSG00000280285 | -1.041839694 | 0.014905726 |
| ENSG00000280298 | -3.278826168 | 0.00000435  |
| ENSG00000280418 | -1.328141184 | 0.006390204 |
| ENSG00000280551 | -1.115061981 | 0.0000613   |
| ENSG00000280660 | -1.052307227 | 0.038630507 |
| ENSG00000280683 | 1.33997898   | 0.040449493 |
| ENSG00000280776 | 1.677789443  | 0.006772764 |
| ENSG00000280969 | 1.23240346   | 0.004704983 |
| ENSG00000281392 | 1.232933086  | 0.000000844 |
| ENSG00000281732 | -2.093898278 | 0.021461506 |
| ENSG00000281769 | 2.107993395  | 0.005482271 |

Table S3: TP53 ChIP-seq binding lncRNAs

|      |         |         |     |                   |                 |       |
|------|---------|---------|-----|-------------------|-----------------|-------|
| chr1 | 267812  | 268207  | 396 | Promoter (<=1kb)  | ENSG00000228463 | -559  |
| chr1 | 268085  | 268480  | 396 | Promoter (<=1kb)  | ENSG00000228463 | -832  |
| chr1 | 995742  | 996137  | 396 | Promoter (2-3kb)  | ENSG00000273443 | 2531  |
| chr1 | 999420  | 999779  | 360 | Promoter (<=1kb)  | ENSG00000273443 | -752  |
| chr1 | 1000640 | 1001035 | 396 | Promoter (1-2kb)  | ENSG00000273443 | -1972 |
| chr1 | 1000752 | 1001111 | 360 | Promoter (2-3kb)  | ENSG00000273443 | -2084 |
| chr1 | 1001814 | 1002209 | 396 | Distal Intergenic | ENSG00000273443 | -3146 |
| chr1 | 1069691 | 1070050 | 360 | Promoter (2-3kb)  | ENSG00000223823 | -2347 |
| chr1 | 1070382 | 1070741 | 360 | Promoter (1-2kb)  | ENSG00000223823 | -1656 |
| chr1 | 1070590 | 1070985 | 396 | Promoter (1-2kb)  | ENSG00000223823 | -1412 |
| chr1 | 1116127 | 1116486 | 360 | Promoter (1-2kb)  | ENSG00000205231 | -1192 |
| chr1 | 1185589 | 1185948 | 360 | Promoter (<=1kb)  | ENSG00000260179 | 766   |
| chr1 | 1209563 | 1209958 | 396 | Promoter (<=1kb)  | ENSG00000230415 | -645  |
| chr1 | 1209767 | 1210162 | 396 | Promoter (<=1kb)  | ENSG00000230415 | -441  |
| chr1 | 1213404 | 1213799 | 396 | Promoter (2-3kb)  | ENSG00000230415 | 2787  |
| chr1 | 1351755 | 1352150 | 396 | Distal Intergenic | ENSG00000225905 | -3475 |
| chr1 | 1371970 | 1372365 | 396 | Promoter (2-3kb)  | ENSG00000225285 | -2017 |
| chr1 | 1371990 | 1372349 | 360 | Promoter (2-3kb)  | ENSG00000225285 | -2037 |
| chr1 | 1372247 | 1372606 | 360 | Promoter (2-3kb)  | ENSG00000225285 | -2294 |
| chr1 | 2311445 | 2311804 | 360 | Promoter (1-2kb)  | ENSG00000271847 | -1646 |
| chr1 | 2314203 | 2314562 | 360 | Distal Intergenic | ENSG00000271847 | -4404 |
| chr1 | 2494488 | 2494883 | 396 | Promoter (2-3kb)  | ENSG00000225931 | -2966 |
| chr1 | 2495616 | 2495975 | 360 | Promoter (1-2kb)  | ENSG00000225931 | -1874 |
| chr1 | 2496226 | 2496621 | 396 | Promoter (1-2kb)  | ENSG00000225931 | -1228 |
| chr1 | 2496258 | 2496617 | 360 | Promoter (1-2kb)  | ENSG00000225931 | -1232 |
| chr1 | 3229666 | 3230061 | 396 | Distal Intergenic | ENSG00000272235 | -3006 |
| chr1 | 3229963 | 3230358 | 396 | Distal Intergenic | ENSG00000272235 | -3303 |
| chr1 | 3652914 | 3653273 | 360 | Promoter (1-2kb)  | ENSG00000227372 | 1166  |
| chr1 | 3998383 | 3998778 | 396 | Promoter (1-2kb)  | ENSG00000233304 | -1895 |
| chr1 | 6448343 | 6448702 | 360 | Distal Intergenic | ENSG00000271746 | -4913 |
| chr1 | 6448458 | 6448853 | 396 | Distal Intergenic | ENSG00000271746 | -4762 |
| chr1 | 6449426 | 6449821 | 396 | Distal Intergenic | ENSG00000271746 | -3794 |
| chr1 | 6449475 | 6449834 | 360 | Distal Intergenic | ENSG00000271746 | -3781 |
| chr1 | 6449676 | 6450035 | 360 | Distal Intergenic | ENSG00000271746 | -3580 |
| chr1 | 6451045 | 6451404 | 360 | Promoter (2-3kb)  | ENSG00000271746 | -2211 |
| chr1 | 6510071 | 6510430 | 360 | Distal Intergenic | ENSG00000231868 | -3005 |
| chr1 | 6510349 | 6510708 | 360 | Distal Intergenic | ENSG00000231868 | -3283 |
| chr1 | 6510548 | 6510943 | 396 | Distal Intergenic | ENSG00000231868 | -3482 |
| chr1 | 6511741 | 6512136 | 396 | Distal Intergenic | ENSG00000231868 | -4675 |
| chr1 | 6511940 | 6512335 | 396 | Distal Intergenic | ENSG00000231868 | -4874 |
| chr1 | 6786076 | 6786435 | 360 | Promoter (1-2kb)  | ENSG00000228750 | -1152 |
| chr1 | 6786571 | 6786930 | 360 | Promoter (<=1kb)  | ENSG00000228750 | -657  |
| chr1 | 7753302 | 7753697 | 396 | Promoter (1-2kb)  | ENSG00000270171 | 1207  |
| chr1 | 7754228 | 7754623 | 396 | Promoter (<=1kb)  | ENSG00000270171 | 281   |
| chr1 | 7762951 | 7763346 | 396 | Promoter (1-2kb)  | ENSG00000269978 | -1921 |
| chr1 | 7838919 | 7839314 | 396 | Promoter (2-3kb)  | ENSG00000269925 | 2476  |
| chr1 | 8084117 | 8084512 | 396 | Promoter (2-3kb)  | ENSG00000238290 | -2286 |
| chr1 | 8084534 | 8084893 | 360 | Promoter (1-2kb)  | ENSG00000238290 | -1905 |
| chr1 | 8086695 | 8087054 | 360 | Promoter (<=1kb)  | ENSG00000238290 | 0     |
| chr1 | 8264711 | 8265106 | 396 | Distal Intergenic | ENSG00000227634 | -3626 |
| chr1 | 8265028 | 8265423 | 396 | Distal Intergenic | ENSG00000227634 | -3309 |
| chr1 | 8282433 | 8282792 | 360 | Promoter (1-2kb)  | ENSG00000233645 | -1844 |
| chr1 | 8864809 | 8865204 | 396 | Promoter (1-2kb)  | ENSG00000228423 | 1906  |
| chr1 | 8865159 | 8865554 | 396 | Promoter (1-2kb)  | ENSG00000228423 | 1556  |
| chr1 | 8866323 | 8866718 | 396 | Promoter (<=1kb)  | ENSG00000228423 | 392   |
| chr1 | 8866625 | 8866984 | 360 | Promoter (<=1kb)  | ENSG00000228423 | 126   |
| chr1 | 8868419 | 8868814 | 396 | Promoter (1-2kb)  | ENSG00000228423 | -1309 |

|      |          |          |     |                    |                 |       |
|------|----------|----------|-----|--------------------|-----------------|-------|
| chr1 | 8869668  | 8870063  | 396 | Promoter (2-3kb)   | ENSG00000228423 | -2558 |
| chr1 | 8871699  | 8872058  | 360 | Distal Intergenic  | ENSG00000228423 | -4589 |
| chr1 | 9238667  | 9239026  | 360 | Distal Intergenic  | ENSG00000234546 | -3237 |
| chr1 | 9238866  | 9239225  | 360 | Downstream (2-3kb) | ENSG00000234546 | -3038 |
| chr1 | 9240308  | 9240703  | 396 | Promoter (1-2kb)   | ENSG00000234546 | -1560 |
| chr1 | 9563858  | 9564253  | 396 | Promoter (<=1kb)   | ENSG00000235263 | -328  |
| chr1 | 9564097  | 9564492  | 396 | Promoter (<=1kb)   | ENSG00000235263 | -567  |
| chr1 | 9565032  | 9565391  | 360 | Promoter (1-2kb)   | ENSG00000235263 | -1502 |
| chr1 | 9565045  | 9565440  | 396 | Promoter (1-2kb)   | ENSG00000235263 | -1515 |
| chr1 | 9565767  | 9566162  | 396 | Promoter (2-3kb)   | ENSG00000235263 | -2237 |
| chr1 | 9566535  | 9566930  | 396 | Distal Intergenic  | ENSG00000235263 | -3005 |
| chr1 | 9566819  | 9567214  | 396 | Distal Intergenic  | ENSG00000235263 | -3289 |
| chr1 | 9748242  | 9748637  | 396 | Promoter (<=1kb)   | ENSG00000231789 | -629  |
| chr1 | 9910825  | 9911220  | 396 | Promoter (2-3kb)   | ENSG00000223989 | 2449  |
| chr1 | 9911037  | 9911432  | 396 | Promoter (2-3kb)   | ENSG00000223989 | 2661  |
| chr1 | 10002190 | 10002585 | 396 | Promoter (<=1kb)   | ENSG00000228150 | -396  |
| chr1 | 10494319 | 10494714 | 396 | Distal Intergenic  | ENSG00000271989 | -3585 |
| chr1 | 10518716 | 10519075 | 360 | Promoter (<=1kb)   | ENSG00000203469 | 104   |
| chr1 | 10519370 | 10519765 | 396 | Promoter (<=1kb)   | ENSG00000203469 | 758   |
| chr1 | 11838688 | 11839083 | 396 | Promoter (<=1kb)   | ENSG00000177553 | 593   |
| chr1 | 11842277 | 11842636 | 360 | Promoter (2-3kb)   | ENSG00000177553 | -2601 |
| chr1 | 11843309 | 11843668 | 360 | Distal Intergenic  | ENSG00000177553 | -3633 |
| chr1 | 15659656 | 15660015 | 360 | Promoter (1-2kb)   | ENSG00000236045 | 1945  |
| chr1 | 15659882 | 15660241 | 360 | Promoter (1-2kb)   | ENSG00000236045 | 1719  |
| chr1 | 15890891 | 15891250 | 360 | Promoter (1-2kb)   | ENSG00000272510 | 1201  |
| chr1 | 16075716 | 16076075 | 360 | Promoter (<=1kb)   | ENSG00000224459 | 316   |
| chr1 | 16078729 | 16079124 | 396 | Promoter (2-3kb)   | ENSG00000224459 | -2338 |
| chr1 | 16078766 | 16079125 | 360 | Promoter (2-3kb)   | ENSG00000224459 | -2375 |
| chr1 | 16164280 | 16164639 | 360 | Promoter (1-2kb)   | ENSG00000179743 | -1925 |
| chr1 | 16171805 | 16172164 | 360 | Promoter (2-3kb)   | ENSG00000179743 | 2478  |
| chr1 | 16174202 | 16174561 | 360 | Promoter (<=1kb)   | ENSG00000179743 | 81    |
| chr1 | 16175666 | 16176025 | 360 | Promoter (1-2kb)   | ENSG00000179743 | -1024 |
| chr1 | 16175741 | 16176136 | 396 | Promoter (1-2kb)   | ENSG00000179743 | -1099 |
| chr1 | 16175866 | 16176225 | 360 | Promoter (1-2kb)   | ENSG00000179743 | -1224 |
| chr1 | 16176638 | 16177033 | 396 | Promoter (1-2kb)   | ENSG00000179743 | -1996 |
| chr1 | 16177908 | 16178267 | 360 | Distal Intergenic  | ENSG00000179743 | -3266 |
| chr1 | 16178179 | 16178538 | 360 | Distal Intergenic  | ENSG00000179743 | -3537 |
| chr1 | 16178464 | 16178823 | 360 | Distal Intergenic  | ENSG00000179743 | -3822 |
| chr1 | 16178730 | 16179089 | 360 | Distal Intergenic  | ENSG00000179743 | -4088 |
| chr1 | 16179420 | 16179779 | 360 | Distal Intergenic  | ENSG00000179743 | -4778 |
| chr1 | 16859413 | 16859772 | 360 | Promoter (<=1kb)   | ENSG00000233421 | 947   |
| chr1 | 19924798 | 19925157 | 360 | Promoter (1-2kb)   | ENSG00000235185 | -1472 |
| chr1 | 19925003 | 19925398 | 396 | Promoter (1-2kb)   | ENSG00000235185 | -1677 |
| chr1 | 19927442 | 19927801 | 360 | Distal Intergenic  | ENSG00000235185 | -4116 |
| chr1 | 20475833 | 20476192 | 360 | Distal Intergenic  | ENSG00000227066 | -4639 |
| chr1 | 20476075 | 20476434 | 360 | Distal Intergenic  | ENSG00000227066 | -4397 |
| chr1 | 20478359 | 20478718 | 360 | Promoter (2-3kb)   | ENSG00000227066 | -2113 |
| chr1 | 20480583 | 20480978 | 396 | Promoter (<=1kb)   | ENSG00000227066 | 0     |
| chr1 | 20480597 | 20480956 | 360 | Promoter (<=1kb)   | ENSG00000227066 | 0     |
| chr1 | 20480788 | 20481183 | 396 | Promoter (<=1kb)   | ENSG00000227066 | 0     |
| chr1 | 20481813 | 20482208 | 396 | Promoter (<=1kb)   | ENSG00000227066 | 982   |
| chr1 | 20484007 | 20484402 | 396 | Promoter (<=1kb)   | ENSG00000227066 | 0     |
| chr1 | 20484212 | 20484607 | 396 | Promoter (<=1kb)   | ENSG00000227066 | 27    |
| chr1 | 20486614 | 20486973 | 360 | Promoter (2-3kb)   | ENSG00000227066 | 2429  |
| chr1 | 20486664 | 20487059 | 396 | Promoter (2-3kb)   | ENSG00000227066 | 2479  |
| chr1 | 20741685 | 20742044 | 360 | Promoter (1-2kb)   | ENSG00000226487 | -1939 |
| chr1 | 21910283 | 21910678 | 396 | Promoter (2-3kb)   | ENSG00000233431 | -2287 |
| chr1 | 23161491 | 23161850 | 360 | Promoter (1-2kb)   | ENSG00000225952 | 1492  |

|      |          |          |     |                   |                 |       |
|------|----------|----------|-----|-------------------|-----------------|-------|
| chr1 | 23614234 | 23614593 | 360 | Promoter (<=1kb)  | ENSG00000261326 | -989  |
| chr1 | 23705051 | 23705446 | 396 | Promoter (<=1kb)  | ENSG00000271420 | 76    |
| chr1 | 24101473 | 24101868 | 396 | Promoter (2-3kb)  | ENSG00000236810 | -2586 |
| chr1 | 24101904 | 24102263 | 360 | Promoter (2-3kb)  | ENSG00000236810 | 2514  |
| chr1 | 24106882 | 24107241 | 360 | Promoter (2-3kb)  | ENSG00000236810 | -2105 |
| chr1 | 24108045 | 24108404 | 360 | Distal Intergenic | ENSG00000236810 | -3268 |
| chr1 | 24108539 | 24108898 | 360 | Distal Intergenic | ENSG00000236810 | -3762 |
| chr1 | 24109227 | 24109586 | 360 | Distal Intergenic | ENSG00000236810 | -4450 |
| chr1 | 24392412 | 24392771 | 360 | Promoter (<=1kb)  | ENSG00000230703 | -493  |
| chr1 | 24392646 | 24393005 | 360 | Promoter (<=1kb)  | ENSG00000230703 | -259  |
| chr1 | 25575859 | 25576218 | 360 | Promoter (1-2kb)  | ENSG00000272432 | 1531  |
| chr1 | 25905807 | 25906166 | 360 | Promoter (1-2kb)  | ENSG00000225643 | -1803 |
| chr1 | 25907296 | 25907655 | 360 | Promoter (<=1kb)  | ENSG00000225643 | -314  |
| chr1 | 25908880 | 25909275 | 396 | Promoter (<=1kb)  | ENSG00000225643 | 911   |
| chr1 | 26161415 | 26161774 | 360 | Promoter (2-3kb)  | ENSG00000272478 | -2790 |
| chr1 | 26161543 | 26161938 | 396 | Promoter (2-3kb)  | ENSG00000272478 | -2918 |
| chr1 | 26500164 | 26500559 | 396 | Promoter (1-2kb)  | ENSG00000236782 | -1852 |
| chr1 | 26501088 | 26501483 | 396 | Promoter (2-3kb)  | ENSG00000236782 | -2776 |
| chr1 | 26501328 | 26501723 | 396 | Distal Intergenic | ENSG00000236782 | -3016 |
| chr1 | 26501571 | 26501930 | 360 | Distal Intergenic | ENSG00000236782 | -3259 |
| chr1 | 26501836 | 26502195 | 360 | Distal Intergenic | ENSG00000236782 | -3524 |
| chr1 | 26794880 | 26795239 | 360 | Promoter (1-2kb)  | ENSG00000225891 | -1107 |
| chr1 | 27197840 | 27198199 | 360 | Distal Intergenic | ENSG00000226698 | -4425 |
| chr1 | 27563365 | 27563724 | 360 | Promoter (2-3kb)  | ENSG00000224311 | -2522 |
| chr1 | 27779085 | 27779480 | 396 | Distal Intergenic | ENSG00000241169 | -4229 |
| chr1 | 27780300 | 27780695 | 396 | Distal Intergenic | ENSG00000241169 | -3014 |
| chr1 | 27991912 | 27992307 | 396 | Promoter (2-3kb)  | ENSG00000233975 | -2679 |
| chr1 | 28291175 | 28291534 | 360 | Distal Intergenic | ENSG00000227050 | -4471 |
| chr1 | 28576562 | 28576921 | 360 | Promoter (2-3kb)  | ENSG00000271398 | 2907  |
| chr1 | 29202627 | 29202986 | 360 | Promoter (<=1kb)  | ENSG00000233427 | 862   |
| chr1 | 31296561 | 31296956 | 396 | Promoter (<=1kb)  | ENSG00000223382 | -119  |
| chr1 | 31296812 | 31297171 | 360 | Promoter (<=1kb)  | ENSG00000223382 | 0     |
| chr1 | 31821114 | 31821509 | 396 | Promoter (1-2kb)  | ENSG00000229044 | -1468 |
| chr1 | 32107889 | 32108248 | 360 | Promoter (1-2kb)  | ENSG00000235790 | -1402 |
| chr1 | 32107894 | 32108289 | 396 | Promoter (1-2kb)  | ENSG00000235790 | -1361 |
| chr1 | 32108576 | 32108971 | 396 | Promoter (<=1kb)  | ENSG00000235790 | -679  |
| chr1 | 32109558 | 32109953 | 396 | Promoter (<=1kb)  | ENSG00000235790 | 0     |
| chr1 | 32120623 | 32120982 | 360 | Promoter (<=1kb)  | ENSG00000235790 | -728  |
| chr1 | 32250035 | 32250430 | 396 | Distal Intergenic | ENSG00000254545 | -4301 |
| chr1 | 32250101 | 32250460 | 360 | Distal Intergenic | ENSG00000254545 | -4271 |
| chr1 | 32250268 | 32250663 | 396 | Distal Intergenic | ENSG00000254545 | -4068 |
| chr1 | 32250556 | 32250951 | 396 | Distal Intergenic | ENSG00000254545 | -3780 |
| chr1 | 32253960 | 32254319 | 360 | Promoter (<=1kb)  | ENSG00000254545 | -412  |
| chr1 | 32321784 | 32322143 | 360 | Promoter (<=1kb)  | ENSG00000203620 | -615  |
| chr1 | 32393952 | 32394347 | 396 | Distal Intergenic | ENSG00000228634 | -4274 |
| chr1 | 32394158 | 32394553 | 396 | Distal Intergenic | ENSG00000228634 | -4068 |
| chr1 | 32394770 | 32395165 | 396 | Distal Intergenic | ENSG00000228634 | -3456 |
| chr1 | 32395071 | 32395466 | 396 | Distal Intergenic | ENSG00000228634 | -3155 |
| chr1 | 32395267 | 32395626 | 360 | Promoter (2-3kb)  | ENSG00000228634 | -2995 |
| chr1 | 32400593 | 32400952 | 360 | Promoter (1-2kb)  | ENSG00000228634 | 1972  |
| chr1 | 32400817 | 32401176 | 360 | Promoter (2-3kb)  | ENSG00000228634 | 2196  |
| chr1 | 32539187 | 32539582 | 396 | Promoter (<=1kb)  | ENSG00000203325 | -112  |
| chr1 | 32540147 | 32540542 | 396 | Promoter (1-2kb)  | ENSG00000203325 | -1072 |
| chr1 | 32814375 | 32814770 | 396 | Promoter (1-2kb)  | ENSG00000233775 | 1494  |
| chr1 | 32817070 | 32817429 | 360 | Promoter (<=1kb)  | ENSG00000233775 | -806  |
| chr1 | 32817202 | 32817597 | 396 | Promoter (<=1kb)  | ENSG00000233775 | -938  |
| chr1 | 32817274 | 32817633 | 360 | Promoter (1-2kb)  | ENSG00000233775 | -1010 |
| chr1 | 32818194 | 32818589 | 396 | Promoter (1-2kb)  | ENSG00000233775 | -1930 |

|      |          |          |     |                   |                 |       |
|------|----------|----------|-----|-------------------|-----------------|-------|
| chr1 | 35317327 | 35317686 | 360 | Promoter (1-2kb)  | ENSG00000230163 | 1032  |
| chr1 | 35444207 | 35444566 | 360 | Promoter (<=1kb)  | ENSG00000241014 | 0     |
| chr1 | 35451586 | 35451945 | 360 | Promoter (<=1kb)  | ENSG00000241014 | -672  |
| chr1 | 36397162 | 36397521 | 360 | Promoter (1-2kb)  | ENSG00000271914 | -1446 |
| chr1 | 36397650 | 36398045 | 396 | Promoter (1-2kb)  | ENSG00000271914 | -1934 |
| chr1 | 36397687 | 36398046 | 360 | Promoter (1-2kb)  | ENSG00000271914 | -1971 |
| chr1 | 36400621 | 36400980 | 360 | Distal Intergenic | ENSG00000271914 | -4905 |
| chr1 | 36482448 | 36482843 | 396 | Distal Intergenic | ENSG00000271554 | -3217 |
| chr1 | 36482903 | 36483262 | 360 | Distal Intergenic | ENSG00000271554 | -3672 |
| chr1 | 38938250 | 38938645 | 396 | Promoter (2-3kb)  | ENSG00000238063 | -2223 |
| chr1 | 38938459 | 38938854 | 396 | Promoter (2-3kb)  | ENSG00000238063 | -2014 |
| chr1 | 38942818 | 38943213 | 396 | Promoter (1-2kb)  | ENSG00000238063 | 1950  |
| chr1 | 39672436 | 39672795 | 360 | Promoter (<=1kb)  | ENSG00000270040 | 252   |
| chr1 | 40096821 | 40097180 | 360 | Promoter (1-2kb)  | ENSG00000225903 | -1908 |
| chr1 | 40096829 | 40097224 | 396 | Promoter (1-2kb)  | ENSG00000225903 | -1864 |
| chr1 | 40097029 | 40097424 | 396 | Promoter (1-2kb)  | ENSG00000225903 | -1664 |
| chr1 | 40256890 | 40257249 | 360 | Promoter (2-3kb)  | ENSG00000261798 | 2242  |
| chr1 | 40358404 | 40358763 | 360 | Distal Intergenic | ENSG00000236546 | -4654 |
| chr1 | 40722765 | 40723160 | 396 | Promoter (<=1kb)  | ENSG00000259943 | 479   |
| chr1 | 40932081 | 40932476 | 396 | Promoter (2-3kb)  | ENSG00000260920 | 2090  |
| chr1 | 40979741 | 40980136 | 396 | Promoter (<=1kb)  | ENSG00000227278 | 593   |
| chr1 | 40982265 | 40982660 | 396 | Promoter (<=1kb)  | ENSG00000238186 | 186   |
| chr1 | 40982489 | 40982884 | 396 | Promoter (<=1kb)  | ENSG00000238186 | 0     |
| chr1 | 40986648 | 40987007 | 360 | Distal Intergenic | ENSG00000238186 | -3802 |
| chr1 | 40987338 | 40987733 | 396 | Distal Intergenic | ENSG00000238186 | -4492 |
| chr1 | 40987797 | 40988192 | 396 | Distal Intergenic | ENSG00000238186 | -4951 |
| chr1 | 43311990 | 43312349 | 360 | Promoter (<=1kb)  | ENSG00000228192 | 0     |
| chr1 | 44516421 | 44516780 | 360 | Promoter (<=1kb)  | ENSG00000230615 | -6    |
| chr1 | 44708139 | 44708498 | 360 | Promoter (1-2kb)  | ENSG00000233602 | 1447  |
| chr1 | 44708274 | 44708669 | 396 | Promoter (1-2kb)  | ENSG00000233602 | 1276  |
| chr1 | 44708365 | 44708724 | 360 | Promoter (1-2kb)  | ENSG00000233602 | 1221  |
| chr1 | 46643314 | 46643709 | 396 | Promoter (1-2kb)  | ENSG00000250719 | -1164 |
| chr1 | 46643615 | 46644010 | 396 | Promoter (1-2kb)  | ENSG00000250719 | -1465 |
| chr1 | 46643946 | 46644341 | 396 | Promoter (1-2kb)  | ENSG00000250719 | -1796 |
| chr1 | 46644163 | 46644558 | 396 | Promoter (2-3kb)  | ENSG00000250719 | -2013 |
| chr1 | 46922409 | 46922804 | 396 | Promoter (<=1kb)  | ENSG00000225667 | 914   |
| chr1 | 47873447 | 47873806 | 360 | Promoter (<=1kb)  | ENSG00000225762 | 343   |
| chr1 | 47873700 | 47874059 | 360 | Promoter (<=1kb)  | ENSG00000225762 | 90    |
| chr1 | 47875336 | 47875695 | 360 | Promoter (1-2kb)  | ENSG00000225762 | -1187 |
| chr1 | 47876181 | 47876540 | 360 | Promoter (2-3kb)  | ENSG00000225762 | -2032 |
| chr1 | 48284974 | 48285369 | 396 | Promoter (1-2kb)  | ENSG00000225028 | 1236  |
| chr1 | 48285037 | 48285396 | 360 | Promoter (1-2kb)  | ENSG00000225028 | 1299  |
| chr1 | 50691131 | 50691490 | 360 | Promoter (2-3kb)  | ENSG00000233407 | -2332 |
| chr1 | 50925714 | 50926073 | 360 | Promoter (1-2kb)  | ENSG00000225767 | -1068 |
| chr1 | 51697917 | 51698312 | 396 | Promoter (2-3kb)  | ENSG00000203356 | 2456  |
| chr1 | 51729212 | 51729571 | 360 | Promoter (2-3kb)  | ENSG00000236434 | 2175  |
| chr1 | 51729241 | 51729636 | 396 | Promoter (2-3kb)  | ENSG00000236434 | 2110  |
| chr1 | 52258098 | 52258457 | 360 | Promoter (1-2kb)  | ENSG00000266993 | -1180 |
| chr1 | 52494220 | 52494615 | 396 | Distal Intergenic | ENSG00000223390 | -4448 |
| chr1 | 52500397 | 52500756 | 360 | Promoter (1-2kb)  | ENSG00000223390 | 1334  |
| chr1 | 53700479 | 53700838 | 360 | Distal Intergenic | ENSG00000226754 | -3444 |
| chr1 | 53838051 | 53838410 | 360 | Distal Intergenic | ENSG00000230138 | -4134 |
| chr1 | 53838322 | 53838717 | 396 | Distal Intergenic | ENSG00000230138 | -4405 |
| chr1 | 54883698 | 54884057 | 360 | Promoter (1-2kb)  | ENSG00000232245 | 1769  |
| chr1 | 55093614 | 55093973 | 360 | Promoter (<=1kb)  | ENSG00000230728 | 138   |
| chr1 | 56413203 | 56413598 | 396 | Promoter (2-3kb)  | ENSG00000233079 | 2443  |
| chr1 | 58324318 | 58324713 | 396 | Promoter (1-2kb)  | ENSG00000226759 | -1491 |
| chr1 | 59279834 | 59280193 | 360 | Promoter (<=1kb)  | ENSG00000272226 | -820  |

|      |          |          |     |                    |                 |       |
|------|----------|----------|-----|--------------------|-----------------|-------|
| chr1 | 59483063 | 59483458 | 396 | Promoter (2-3kb)   | ENSG00000230812 | -2601 |
| chr1 | 59483381 | 59483776 | 396 | Promoter (2-3kb)   | ENSG00000230812 | -2283 |
| chr1 | 59522561 | 59522920 | 360 | Promoter (<=1kb)   | ENSG00000237352 | 246   |
| chr1 | 59523463 | 59523822 | 360 | Promoter (1-2kb)   | ENSG00000237352 | 1148  |
| chr1 | 59543093 | 59543488 | 396 | Promoter (<=1kb)   | ENSG00000235215 | 300   |
| chr1 | 59543371 | 59543766 | 396 | Promoter (<=1kb)   | ENSG00000235215 | 22    |
| chr1 | 59544285 | 59544644 | 360 | Promoter (<=1kb)   | ENSG00000235215 | -497  |
| chr1 | 59545873 | 59546232 | 360 | Promoter (2-3kb)   | ENSG00000235215 | -2085 |
| chr1 | 59666626 | 59666985 | 360 | Promoter (2-3kb)   | ENSG00000224609 | -2333 |
| chr1 | 61108799 | 61109194 | 396 | Promoter (2-3kb)   | ENSG00000226476 | -2636 |
| chr1 | 61109018 | 61109413 | 396 | Promoter (2-3kb)   | ENSG00000226476 | -2855 |
| chr1 | 61295642 | 61296037 | 396 | Distal Intergenic  | ENSG00000231252 | -4386 |
| chr1 | 63149036 | 63149431 | 396 | Distal Intergenic  | ENSG00000235545 | -4722 |
| chr1 | 63149044 | 63149403 | 360 | Distal Intergenic  | ENSG00000235545 | -4750 |
| chr1 | 63601739 | 63602098 | 360 | Promoter (2-3kb)   | ENSG00000203605 | -2823 |
| chr1 | 63606518 | 63606877 | 360 | Promoter (1-2kb)   | ENSG00000203605 | 1597  |
| chr1 | 63623991 | 63624350 | 360 | Promoter (1-2kb)   | ENSG00000271593 | 1731  |
| chr1 | 65456177 | 65456536 | 360 | Promoter (<=1kb)   | ENSG00000226891 | 551   |
| chr1 | 65471431 | 65471826 | 396 | Promoter (1-2kb)   | ENSG00000272506 | -1661 |
| chr1 | 69897179 | 69897538 | 360 | Promoter (1-2kb)   | ENSG00000229639 | -1400 |
| chr1 | 83914428 | 83914823 | 396 | Promoter (2-3kb)   | ENSG00000231364 | 2692  |
| chr1 | 84253904 | 84254299 | 396 | Promoter (1-2kb)   | ENSG00000237076 | -1664 |
| chr1 | 90283761 | 90284120 | 360 | Promoter (2-3kb)   | ENSG00000272931 | 2307  |
| chr1 | 90995886 | 90996245 | 360 | Promoter (2-3kb)   | ENSG00000229201 | 2784  |
| chr1 | 91002299 | 91002658 | 360 | Distal Intergenic  | ENSG00000229201 | -3270 |
| chr1 | 93780954 | 93781313 | 360 | Promoter (<=1kb)   | ENSG00000223745 | -128  |
| chr1 | 93784343 | 93784738 | 396 | Intron (ENST000004 | ENSG00000223745 | -3517 |
| chr1 | 93784607 | 93785002 | 396 | Intron (ENST000004 | ENSG00000223745 | -3781 |
| chr1 | 93784626 | 93784985 | 360 | Intron (ENST000004 | ENSG00000223745 | -3800 |
| chr1 | 93813970 | 93814365 | 396 | Promoter (2-3kb)   | ENSG00000223745 | -2388 |
| chr1 | 93814006 | 93814365 | 360 | Promoter (2-3kb)   | ENSG00000223745 | -2424 |
| chr1 | 94056844 | 94057203 | 360 | Promoter (<=1kb)   | ENSG00000224093 | -553  |
| chr1 | 94060447 | 94060806 | 360 | Promoter (<=1kb)   | ENSG00000224093 | 500   |
| chr1 | 94061896 | 94062291 | 396 | Promoter (1-2kb)   | ENSG00000224093 | 1949  |
| chr1 | 94062097 | 94062492 | 396 | Promoter (2-3kb)   | ENSG00000224093 | 2150  |
| chr1 | 94238271 | 94238630 | 360 | Promoter (2-3kb)   | ENSG00000230439 | 2370  |
| chr1 | 94240863 | 94241222 | 360 | Promoter (<=1kb)   | ENSG00000230439 | 0     |
| chr1 | 94309189 | 94309584 | 396 | Distal Intergenic  | ENSG00000260464 | -3146 |
| chr1 | 95122110 | 95122469 | 360 | Promoter (1-2kb)   | ENSG00000224081 | 1337  |
| chr1 | 95122151 | 95122546 | 396 | Promoter (1-2kb)   | ENSG00000224081 | 1260  |
| chr1 | 95726372 | 95726767 | 396 | Promoter (2-3kb)   | ENSG00000228852 | 2843  |
| chr1 | 98516640 | 98517035 | 396 | Promoter (1-2kb)   | ENSG00000225206 | -1221 |
| chr1 | 1.02E+08 | 1.02E+08 | 396 | Promoter (1-2kb)   | ENSG00000233184 | -1988 |
| chr1 | 1.02E+08 | 1.02E+08 | 360 | Promoter (2-3kb)   | ENSG00000233184 | -2005 |
| chr1 | 1.09E+08 | 1.09E+08 | 396 | Promoter (<=1kb)   | ENSG00000238122 | 610   |
| chr1 | 1.09E+08 | 1.09E+08 | 396 | Promoter (<=1kb)   | ENSG00000224698 | 0     |
| chr1 | 1.09E+08 | 1.09E+08 | 360 | Promoter (<=1kb)   | ENSG00000224698 | 528   |
| chr1 | 1.09E+08 | 1.09E+08 | 396 | Promoter (2-3kb)   | ENSG00000232971 | 2341  |
| chr1 | 1.09E+08 | 1.09E+08 | 360 | Promoter (2-3kb)   | ENSG00000232971 | 2359  |
| chr1 | 1.09E+08 | 1.09E+08 | 360 | Promoter (1-2kb)   | ENSG00000232971 | 1540  |
| chr1 | 1.09E+08 | 1.09E+08 | 360 | Promoter (2-3kb)   | ENSG00000232971 | -2416 |
| chr1 | 1.09E+08 | 1.09E+08 | 360 | Promoter (2-3kb)   | ENSG00000203897 | -2732 |
| chr1 | 1.1E+08  | 1.1E+08  | 360 | Promoter (1-2kb)   | ENSG00000270066 | 1521  |
| chr1 | 1.1E+08  | 1.1E+08  | 360 | Distal Intergenic  | ENSG00000261055 | -4184 |
| chr1 | 1.11E+08 | 1.11E+08 | 396 | Promoter (1-2kb)   | ENSG00000259834 | 1527  |
| chr1 | 1.11E+08 | 1.11E+08 | 360 | Promoter (1-2kb)   | ENSG00000259834 | 1056  |
| chr1 | 1.11E+08 | 1.11E+08 | 360 | Promoter (<=1kb)   | ENSG00000259834 | -554  |
| chr1 | 1.11E+08 | 1.11E+08 | 360 | Promoter (2-3kb)   | ENSG00000261654 | 2557  |



|      |          |          |     |                    |                 |       |
|------|----------|----------|-----|--------------------|-----------------|-------|
| chr1 | 1.12E+08 | 1.12E+08 | 360 | Promoter (1-2kb)   | ENSG00000273010 | 1877  |
| chr1 | 1.12E+08 | 1.12E+08 | 396 | Promoter (2-3kb)   | ENSG00000273010 | 2027  |
| chr1 | 1.12E+08 | 1.12E+08 | 360 | Promoter (2-3kb)   | ENSG00000273010 | 2076  |
| chr1 | 1.12E+08 | 1.12E+08 | 360 | Promoter (2-3kb)   | ENSG00000273010 | 2603  |
| chr1 | 1.12E+08 | 1.12E+08 | 360 | Promoter (<=1kb)   | ENSG00000273221 | -271  |
| chr1 | 1.12E+08 | 1.12E+08 | 360 | Promoter (2-3kb)   | ENSG00000232558 | 2193  |
| chr1 | 1.13E+08 | 1.13E+08 | 360 | Promoter (2-3kb)   | ENSG00000231246 | -2704 |
| chr1 | 1.13E+08 | 1.13E+08 | 396 | Promoter (<=1kb)   | ENSG00000215866 | 917   |
| chr1 | 1.14E+08 | 1.14E+08 | 360 | Promoter (<=1kb)   | ENSG00000236066 | 0     |
| chr1 | 1.16E+08 | 1.16E+08 | 396 | Promoter (<=1kb)   | ENSG00000233730 | 0     |
| chr1 | 1.16E+08 | 1.16E+08 | 396 | Promoter (<=1kb)   | ENSG00000233730 | 334   |
| chr1 | 1.16E+08 | 1.16E+08 | 360 | Promoter (2-3kb)   | ENSG00000228035 | 2518  |
| chr1 | 1.17E+08 | 1.17E+08 | 396 | Promoter (<=1kb)   | ENSG00000237993 | 951   |
| chr1 | 1.17E+08 | 1.17E+08 | 396 | Promoter (<=1kb)   | ENSG00000237993 | 720   |
| chr1 | 1.2E+08  | 1.2E+08  | 360 | Promoter (<=1kb)   | ENSG00000232650 | 160   |
| chr1 | 1.46E+08 | 1.46E+08 | 396 | Promoter (2-3kb)   | ENSG00000235702 | -2877 |
| chr1 | 1.46E+08 | 1.46E+08 | 396 | Promoter (1-2kb)   | ENSG00000235702 | -1507 |
| chr1 | 1.47E+08 | 1.47E+08 | 396 | Promoter (2-3kb)   | ENSG00000227139 | -2792 |
| chr1 | 1.47E+08 | 1.47E+08 | 360 | Promoter (2-3kb)   | ENSG00000227139 | -2747 |
| chr1 | 1.47E+08 | 1.47E+08 | 396 | Promoter (<=1kb)   | ENSG00000227139 | 674   |
| chr1 | 1.47E+08 | 1.47E+08 | 396 | Promoter (<=1kb)   | ENSG00000227139 | 879   |
| chr1 | 1.47E+08 | 1.47E+08 | 396 | Promoter (1-2kb)   | ENSG00000227139 | 1478  |
| chr1 | 1.47E+08 | 1.47E+08 | 360 | Promoter (2-3kb)   | ENSG00000227139 | 2068  |
| chr1 | 1.47E+08 | 1.47E+08 | 360 | Promoter (2-3kb)   | ENSG00000227139 | 2271  |
| chr1 | 1.47E+08 | 1.47E+08 | 396 | Distal Intergenic  | ENSG00000234482 | -4657 |
| chr1 | 1.47E+08 | 1.47E+08 | 360 | Distal Intergenic  | ENSG00000234482 | -4623 |
| chr1 | 1.47E+08 | 1.47E+08 | 360 | Distal Intergenic  | ENSG00000234482 | -3949 |
| chr1 | 1.47E+08 | 1.47E+08 | 396 | Promoter (1-2kb)   | ENSG00000234190 | 1493  |
| chr1 | 1.47E+08 | 1.47E+08 | 396 | Promoter (2-3kb)   | ENSG00000234190 | 2558  |
| chr1 | 1.48E+08 | 1.48E+08 | 360 | Promoter (2-3kb)   | ENSG00000226335 | 2523  |
| chr1 | 1.48E+08 | 1.48E+08 | 396 | Promoter (2-3kb)   | ENSG00000226335 | 2041  |
| chr1 | 1.48E+08 | 1.48E+08 | 396 | Promoter (<=1kb)   | ENSG00000226335 | 0     |
| chr1 | 1.5E+08  | 1.5E+08  | 360 | Promoter (2-3kb)   | ENSG00000228126 | -2991 |
| chr1 | 1.5E+08  | 1.5E+08  | 396 | Promoter (<=1kb)   | ENSG00000228126 | -756  |
| chr1 | 1.5E+08  | 1.5E+08  | 396 | Promoter (<=1kb)   | ENSG00000228126 | -156  |
| chr1 | 1.5E+08  | 1.5E+08  | 396 | Promoter (<=1kb)   | ENSG00000228126 | 322   |
| chr1 | 1.5E+08  | 1.5E+08  | 396 | Promoter (<=1kb)   | ENSG00000228126 | 589   |
| chr1 | 1.51E+08 | 1.51E+08 | 396 | Promoter (2-3kb)   | ENSG00000231073 | 2015  |
| chr1 | 1.51E+08 | 1.51E+08 | 396 | Distal Intergenic  | ENSG00000261168 | -4104 |
| chr1 | 1.51E+08 | 1.51E+08 | 396 | Distal Intergenic  | ENSG00000261168 | -4305 |
| chr1 | 1.51E+08 | 1.51E+08 | 360 | Distal Intergenic  | ENSG00000261168 | -4391 |
| chr1 | 1.51E+08 | 1.51E+08 | 360 | Distal Intergenic  | ENSG00000261168 | -4599 |
| chr1 | 1.51E+08 | 1.51E+08 | 360 | Promoter (1-2kb)   | ENSG00000224645 | -1352 |
| chr1 | 1.52E+08 | 1.52E+08 | 396 | Promoter (<=1kb)   | ENSG00000232536 | -495  |
| chr1 | 1.52E+08 | 1.52E+08 | 396 | Promoter (<=1kb)   | ENSG00000232536 | 438   |
| chr1 | 1.52E+08 | 1.52E+08 | 360 | Downstream (1-2kb) | ENSG00000232937 | -3692 |
| chr1 | 1.52E+08 | 1.52E+08 | 360 | Downstream (1-2kb) | ENSG00000232937 | -3491 |
| chr1 | 1.52E+08 | 1.52E+08 | 360 | Promoter (2-3kb)   | ENSG00000232937 | -2652 |
| chr1 | 1.52E+08 | 1.52E+08 | 396 | Promoter (<=1kb)   | ENSG00000203288 | -415  |
| chr1 | 1.52E+08 | 1.52E+08 | 360 | Promoter (<=1kb)   | ENSG00000203288 | 0     |
| chr1 | 1.52E+08 | 1.52E+08 | 396 | Promoter (<=1kb)   | ENSG00000203288 | 57    |
| chr1 | 1.54E+08 | 1.54E+08 | 360 | Promoter (<=1kb)   | ENSG00000238279 | 751   |
| chr1 | 1.54E+08 | 1.54E+08 | 396 | Promoter (1-2kb)   | ENSG00000238279 | 1439  |
| chr1 | 1.54E+08 | 1.54E+08 | 396 | Promoter (1-2kb)   | ENSG00000272030 | -1923 |
| chr1 | 1.54E+08 | 1.54E+08 | 396 | Distal Intergenic  | ENSG00000272654 | -3262 |
| chr1 | 1.54E+08 | 1.54E+08 | 360 | Distal Intergenic  | ENSG00000272654 | -3222 |
| chr1 | 1.54E+08 | 1.54E+08 | 360 | Distal Intergenic  | ENSG00000228013 | -4532 |
| chr1 | 1.54E+08 | 1.54E+08 | 396 | Promoter (1-2kb)   | ENSG00000273110 | -1742 |

|      |          |          |     |                                     |                 |       |
|------|----------|----------|-----|-------------------------------------|-----------------|-------|
| chr1 | 1.55E+08 | 1.55E+08 | 360 | Promoter (1-2kb)                    | ENSG00000271380 | -1242 |
| chr1 | 1.55E+08 | 1.55E+08 | 396 | Promoter (2-3kb)                    | ENSG00000271380 | 2117  |
| chr1 | 1.55E+08 | 1.55E+08 | 360 | Promoter (2-3kb)                    | ENSG00000271380 | 2418  |
| chr1 | 1.55E+08 | 1.55E+08 | 360 | Promoter (2-3kb)                    | ENSG00000271380 | 2620  |
| chr1 | 1.55E+08 | 1.55E+08 | 396 | Promoter (2-3kb)                    | ENSG00000271380 | 2628  |
| chr1 | 1.55E+08 | 1.55E+08 | 396 | Promoter (2-3kb)                    | ENSG00000271380 | 2936  |
| chr1 | 1.55E+08 | 1.55E+08 | 396 | Promoter (<=1kb)                    | ENSG00000232093 | 952   |
| chr1 | 1.55E+08 | 1.55E+08 | 360 | Promoter (<=1kb)                    | ENSG00000232093 | 733   |
| chr1 | 1.55E+08 | 1.55E+08 | 396 | Promoter (<=1kb)                    | ENSG00000232093 | 685   |
| chr1 | 1.55E+08 | 1.55E+08 | 396 | Promoter (2-3kb)                    | ENSG00000231064 | 2306  |
| chr1 | 1.55E+08 | 1.55E+08 | 360 | Promoter (2-3kb)                    | ENSG00000231064 | 2417  |
| chr1 | 1.55E+08 | 1.55E+08 | 396 | Promoter (2-3kb)                    | ENSG00000231064 | 2534  |
| chr1 | 1.55E+08 | 1.55E+08 | 360 | Promoter (2-3kb)                    | ENSG00000231064 | 2658  |
| chr1 | 1.55E+08 | 1.55E+08 | 396 | Promoter (2-3kb)                    | ENSG00000231064 | 2804  |
| chr1 | 1.56E+08 | 1.56E+08 | 396 | Distal Intergenic                   | ENSG00000273002 | -4485 |
| chr1 | 1.56E+08 | 1.56E+08 | 396 | Distal Intergenic                   | ENSG00000273002 | -4249 |
| chr1 | 1.56E+08 | 1.56E+08 | 360 | Distal Intergenic                   | ENSG00000273002 | -3711 |
| chr1 | 1.56E+08 | 1.56E+08 | 396 | Distal Intergenic                   | ENSG00000273002 | -3551 |
| chr1 | 1.56E+08 | 1.56E+08 | 396 | Promoter (2-3kb)                    | ENSG00000273002 | -2657 |
| chr1 | 1.56E+08 | 1.56E+08 | 360 | Promoter (2-3kb)                    | ENSG00000273002 | -2605 |
| chr1 | 1.56E+08 | 1.56E+08 | 396 | Promoter (2-3kb)                    | ENSG00000273002 | -2412 |
| chr1 | 1.56E+08 | 1.56E+08 | 360 | Promoter (<=1kb)                    | ENSG00000237390 | 365   |
| chr1 | 1.57E+08 | 1.57E+08 | 360 | Promoter (2-3kb)                    | ENSG00000272971 | 2941  |
| chr1 | 1.57E+08 | 1.57E+08 | 360 | Promoter (2-3kb)                    | ENSG00000272068 | 2328  |
| chr1 | 1.57E+08 | 1.57E+08 | 360 | Promoter (<=1kb)                    | ENSG00000272405 | -699  |
| chr1 | 1.57E+08 | 1.57E+08 | 360 | Promoter (1-2kb)                    | ENSG00000229953 | -1731 |
| chr1 | 1.57E+08 | 1.57E+08 | 396 | Promoter (<=1kb)                    | ENSG00000237588 | 789   |
| chr1 | 1.57E+08 | 1.57E+08 | 360 | Promoter (<=1kb)                    | ENSG00000237588 | 574   |
| chr1 | 1.57E+08 | 1.57E+08 | 360 | Promoter (<=1kb)                    | ENSG00000237588 | 350   |
| chr1 | 1.57E+08 | 1.57E+08 | 396 | Promoter (<=1kb)                    | ENSG00000237588 | 287   |
| chr1 | 1.57E+08 | 1.57E+08 | 360 | Promoter (<=1kb)                    | ENSG00000237588 | 90    |
| chr1 | 1.57E+08 | 1.57E+08 | 360 | Promoter (<=1kb)                    | ENSG00000229961 | 937   |
| chr1 | 1.59E+08 | 1.59E+08 | 360 | Promoter (<=1kb)                    | ENSG00000225670 | 133   |
| chr1 | 1.59E+08 | 1.59E+08 | 396 | Promoter (<=1kb)                    | ENSG00000225670 | 75    |
| chr1 | 1.6E+08  | 1.6E+08  | 360 | Promoter (<=1kb)                    | ENSG00000225279 | -94   |
| chr1 | 1.6E+08  | 1.6E+08  | 396 | Promoter (<=1kb)                    | ENSG00000225279 | -50   |
| chr1 | 1.6E+08  | 1.6E+08  | 360 | Promoter (<=1kb)                    | ENSG00000225279 | 0     |
| chr1 | 1.61E+08 | 1.61E+08 | 360 | Promoter (<=1kb)                    | ENSG00000228917 | 197   |
| chr1 | 1.61E+08 | 1.61E+08 | 396 | Distal Intergenic                   | ENSG00000224985 | -3654 |
| chr1 | 1.62E+08 | 1.62E+08 | 396 | Promoter (2-3kb)                    | ENSG00000224515 | 2734  |
| chr1 | 1.62E+08 | 1.62E+08 | 396 | Promoter (2-3kb)                    | ENSG00000224515 | 2390  |
| chr1 | 1.62E+08 | 1.62E+08 | 360 | Promoter (2-3kb)                    | ENSG00000224515 | 2395  |
| chr1 | 1.62E+08 | 1.62E+08 | 360 | Intron (ENST000005:ENSG00000224515) | ENSG00000224515 | -3206 |
| chr1 | 1.62E+08 | 1.62E+08 | 396 | Promoter (2-3kb)                    | ENSG00000234211 | -2628 |
| chr1 | 1.63E+08 | 1.63E+08 | 396 | Promoter (2-3kb)                    | ENSG00000272574 | -2096 |
| chr1 | 1.63E+08 | 1.63E+08 | 396 | Promoter (1-2kb)                    | ENSG00000272574 | -1890 |
| chr1 | 1.63E+08 | 1.63E+08 | 396 | Promoter (<=1kb)                    | ENSG00000272574 | -635  |
| chr1 | 1.63E+08 | 1.63E+08 | 396 | Promoter (<=1kb)                    | ENSG00000272574 | -320  |
| chr1 | 1.63E+08 | 1.63E+08 | 360 | Promoter (1-2kb)                    | ENSG00000272574 | 1657  |
| chr1 | 1.66E+08 | 1.66E+08 | 360 | Promoter (<=1kb)                    | ENSG00000236364 | -922  |
| chr1 | 1.66E+08 | 1.66E+08 | 360 | Promoter (2-3kb)                    | ENSG00000236364 | -2195 |
| chr1 | 1.67E+08 | 1.67E+08 | 396 | Promoter (1-2kb)                    | ENSG00000237096 | 1840  |
| chr1 | 1.67E+08 | 1.67E+08 | 396 | Promoter (1-2kb)                    | ENSG00000237096 | 1515  |
| chr1 | 1.67E+08 | 1.67E+08 | 360 | Promoter (1-2kb)                    | ENSG00000237096 | 1317  |
| chr1 | 1.67E+08 | 1.67E+08 | 396 | Promoter (<=1kb)                    | ENSG00000237096 | 544   |
| chr1 | 1.67E+08 | 1.67E+08 | 360 | Promoter (<=1kb)                    | ENSG00000237096 | 546   |
| chr1 | 1.67E+08 | 1.67E+08 | 360 | Promoter (2-3kb)                    | ENSG00000272033 | -2075 |
| chr1 | 1.67E+08 | 1.67E+08 | 360 | Promoter (1-2kb)                    | ENSG00000273160 | -1980 |

|      |          |          |     |                                      |                 |       |
|------|----------|----------|-----|--------------------------------------|-----------------|-------|
| chr1 | 1.67E+08 | 1.67E+08 | 360 | Promoter (2-3kb)                     | ENSG00000273160 | -2242 |
| chr1 | 1.67E+08 | 1.67E+08 | 360 | Promoter (2-3kb)                     | ENSG00000273160 | -2513 |
| chr1 | 1.68E+08 | 1.68E+08 | 360 | Promoter (<=1kb)                     | ENSG00000241666 | -268  |
| chr1 | 1.68E+08 | 1.68E+08 | 360 | Distal Intergenic                    | ENSG00000237658 | -4876 |
| chr1 | 1.69E+08 | 1.69E+08 | 360 | Promoter (<=1kb)                     | ENSG00000225826 | 0     |
| chr1 | 1.69E+08 | 1.69E+08 | 360 | Promoter (2-3kb)                     | ENSG00000203601 | -2715 |
| chr1 | 1.7E+08  | 1.7E+08  | 396 | Promoter (2-3kb)                     | ENSG00000224286 | -2205 |
| chr1 | 1.71E+08 | 1.71E+08 | 396 | Promoter (1-2kb)                     | ENSG00000235303 | 1787  |
| chr1 | 1.73E+08 | 1.73E+08 | 396 | Promoter (2-3kb)                     | ENSG00000224228 | -2073 |
| chr1 | 1.73E+08 | 1.73E+08 | 396 | Promoter (1-2kb)                     | ENSG00000224228 | 1398  |
| chr1 | 1.74E+08 | 1.74E+08 | 396 | Promoter (1-2kb)                     | ENSG00000238272 | -1175 |
| chr1 | 1.74E+08 | 1.74E+08 | 396 | Promoter (<=1kb)                     | ENSG00000238272 | -891  |
| chr1 | 1.74E+08 | 1.74E+08 | 360 | Promoter (<=1kb)                     | ENSG00000234741 | 8     |
| chr1 | 1.74E+08 | 1.74E+08 | 396 | Promoter (<=1kb)                     | ENSG00000234741 | 0     |
| chr1 | 1.74E+08 | 1.74E+08 | 396 | Distal Intergenic                    | ENSG00000227373 | -4490 |
| chr1 | 1.77E+08 | 1.77E+08 | 360 | Distal Intergenic                    | ENSG00000224968 | -4228 |
| chr1 | 1.78E+08 | 1.78E+08 | 360 | Promoter (<=1kb)                     | ENSG00000227579 | 223   |
| chr1 | 1.78E+08 | 1.78E+08 | 360 | Promoter (<=1kb)                     | ENSG00000227579 | 0     |
| chr1 | 1.78E+08 | 1.78E+08 | 360 | Distal Intergenic                    | ENSG00000227579 | -4868 |
| chr1 | 1.78E+08 | 1.78E+08 | 396 | Promoter (<=1kb)                     | ENSG00000254154 | -566  |
| chr1 | 1.8E+08  | 1.8E+08  | 360 | Distal Intergenic                    | ENSG00000243062 | -4185 |
| chr1 | 1.8E+08  | 1.8E+08  | 360 | Intron (ENST000004: ENSG00000243062) | ENSG00000243062 | -3828 |
| chr1 | 1.8E+08  | 1.8E+08  | 360 | Promoter (2-3kb)                     | ENSG00000261817 | -2613 |
| chr1 | 1.81E+08 | 1.81E+08 | 396 | Promoter (1-2kb)                     | ENSG00000232586 | -1863 |
| chr1 | 1.81E+08 | 1.81E+08 | 396 | Promoter (2-3kb)                     | ENSG00000232586 | -2087 |
| chr1 | 1.81E+08 | 1.81E+08 | 396 | Intron (ENST000003: ENSG00000232586) | ENSG00000232586 | -3746 |
| chr1 | 1.81E+08 | 1.81E+08 | 396 | Intron (ENST000003: ENSG00000232586) | ENSG00000232586 | -3950 |
| chr1 | 1.81E+08 | 1.81E+08 | 360 | Promoter (2-3kb)                     | ENSG00000243155 | -2520 |
| chr1 | 1.81E+08 | 1.81E+08 | 396 | Promoter (1-2kb)                     | ENSG00000237292 | -1836 |
| chr1 | 1.81E+08 | 1.81E+08 | 396 | Promoter (<=1kb)                     | ENSG00000237292 | -348  |
| chr1 | 1.81E+08 | 1.81E+08 | 396 | Promoter (<=1kb)                     | ENSG00000237292 | 998   |
| chr1 | 1.82E+08 | 1.82E+08 | 360 | Promoter (2-3kb)                     | ENSG00000228918 | -2594 |
| chr1 | 1.83E+08 | 1.83E+08 | 396 | Promoter (2-3kb)                     | ENSG00000261185 | -2584 |
| chr1 | 1.83E+08 | 1.83E+08 | 360 | Promoter (2-3kb)                     | ENSG00000261185 | -2650 |
| chr1 | 1.83E+08 | 1.83E+08 | 396 | Promoter (<=1kb)                     | ENSG00000224468 | 888   |
| chr1 | 1.85E+08 | 1.85E+08 | 396 | Promoter (<=1kb)                     | ENSG00000261024 | 0     |
| chr1 | 1.85E+08 | 1.85E+08 | 396 | Promoter (<=1kb)                     | ENSG00000261024 | -103  |
| chr1 | 1.87E+08 | 1.87E+08 | 360 | Promoter (<=1kb)                     | ENSG00000236030 | 591   |
| chr1 | 1.87E+08 | 1.87E+08 | 396 | Distal Intergenic                    | ENSG00000231599 | -4194 |
| chr1 | 1.87E+08 | 1.87E+08 | 360 | Distal Intergenic                    | ENSG00000231599 | -4208 |
| chr1 | 1.87E+08 | 1.87E+08 | 360 | Promoter (<=1kb)                     | ENSG00000272827 | -56   |
| chr1 | 1.93E+08 | 1.93E+08 | 396 | Distal Intergenic                    | ENSG00000232498 | -4400 |
| chr1 | 1.93E+08 | 1.93E+08 | 396 | Promoter (1-2kb)                     | ENSG00000272579 | 1079  |
| chr1 | 1.93E+08 | 1.93E+08 | 360 | Promoter (1-2kb)                     | ENSG00000272579 | 1105  |
| chr1 | 1.93E+08 | 1.93E+08 | 396 | Distal Intergenic                    | ENSG00000272579 | -4646 |
| chr1 | 2E+08    | 2E+08    | 360 | Promoter (1-2kb)                     | ENSG00000273093 | 1210  |
| chr1 | 2.02E+08 | 2.02E+08 | 396 | Promoter (1-2kb)                     | ENSG00000234678 | 1246  |
| chr1 | 2.02E+08 | 2.02E+08 | 360 | Promoter (1-2kb)                     | ENSG00000249007 | 1476  |
| chr1 | 2.03E+08 | 2.03E+08 | 360 | Promoter (1-2kb)                     | ENSG00000225620 | -1113 |
| chr1 | 2.03E+08 | 2.03E+08 | 360 | Promoter (<=1kb)                     | ENSG00000233791 | 343   |
| chr1 | 2.04E+08 | 2.04E+08 | 360 | Promoter (<=1kb)                     | ENSG00000261065 | 437   |
| chr1 | 2.04E+08 | 2.04E+08 | 360 | Promoter (1-2kb)                     | ENSG00000261065 | 1805  |
| chr1 | 2.04E+08 | 2.04E+08 | 396 | Promoter (1-2kb)                     | ENSG00000261065 | 1866  |
| chr1 | 2.04E+08 | 2.04E+08 | 360 | Distal Intergenic                    | ENSG00000230550 | -3025 |
| chr1 | 2.04E+08 | 2.04E+08 | 360 | Promoter (<=1kb)                     | ENSG00000226330 | 771   |
| chr1 | 2.04E+08 | 2.04E+08 | 360 | Promoter (1-2kb)                     | ENSG00000226330 | 1070  |
| chr1 | 2.05E+08 | 2.05E+08 | 360 | Distal Intergenic                    | ENSG00000225063 | -4745 |
| chr1 | 2.05E+08 | 2.05E+08 | 396 | Distal Intergenic                    | ENSG00000225063 | -4940 |

|      |          |          |     |                     |                 |       |
|------|----------|----------|-----|---------------------|-----------------|-------|
| chr1 | 2.05E+08 | 2.05E+08 | 360 | Distal Intergenic   | ENSG00000225063 | -4981 |
| chr1 | 2.07E+08 | 2.07E+08 | 360 | Promoter (<=1kb)    | ENSG00000233501 | -420  |
| chr1 | 2.08E+08 | 2.08E+08 | 396 | Intron (ENST000005) | ENSG00000236911 | -3936 |
| chr1 | 2.08E+08 | 2.08E+08 | 396 | Promoter (1-2kb)    | ENSG00000236911 | -1892 |
| chr1 | 2.08E+08 | 2.08E+08 | 396 | Promoter (1-2kb)    | ENSG00000203709 | 1677  |
| chr1 | 2.09E+08 | 2.09E+08 | 360 | Promoter (1-2kb)    | ENSG00000232812 | 1898  |
| chr1 | 2.1E+08  | 2.1E+08  | 396 | Promoter (<=1kb)    | ENSG00000224260 | -27   |
| chr1 | 2.1E+08  | 2.1E+08  | 360 | Promoter (2-3kb)    | ENSG00000227591 | -2168 |
| chr1 | 2.12E+08 | 2.12E+08 | 396 | Intron (ENST000004) | ENSG00000261252 | -4896 |
| chr1 | 2.12E+08 | 2.12E+08 | 360 | Intron (ENST000004) | ENSG00000261252 | -4915 |
| chr1 | 2.12E+08 | 2.12E+08 | 360 | Intron (ENST000004) | ENSG00000261252 | -4685 |
| chr1 | 2.12E+08 | 2.12E+08 | 396 | Promoter (1-2kb)    | ENSG00000223649 | 1602  |
| chr1 | 2.12E+08 | 2.12E+08 | 360 | Promoter (2-3kb)    | ENSG00000223649 | 2470  |
| chr1 | 2.12E+08 | 2.12E+08 | 360 | Promoter (1-2kb)    | ENSG00000226868 | 1326  |
| chr1 | 2.12E+08 | 2.12E+08 | 396 | Promoter (1-2kb)    | ENSG00000226868 | 1191  |
| chr1 | 2.12E+08 | 2.12E+08 | 396 | Promoter (<=1kb)    | ENSG00000226868 | 704   |
| chr1 | 2.12E+08 | 2.12E+08 | 360 | Promoter (<=1kb)    | ENSG00000229258 | 0     |
| chr1 | 2.12E+08 | 2.12E+08 | 360 | Promoter (1-2kb)    | ENSG00000226251 | -1692 |
| chr1 | 2.12E+08 | 2.12E+08 | 360 | Promoter (<=1kb)    | ENSG00000226251 | 426   |
| chr1 | 2.12E+08 | 2.12E+08 | 396 | Promoter (<=1kb)    | ENSG00000226251 | 0     |
| chr1 | 2.12E+08 | 2.12E+08 | 396 | Promoter (1-2kb)    | ENSG00000226251 | -1927 |
| chr1 | 2.12E+08 | 2.12E+08 | 396 | Promoter (2-3kb)    | ENSG00000226251 | -2456 |
| chr1 | 2.12E+08 | 2.12E+08 | 396 | Promoter (2-3kb)    | ENSG00000226251 | -2710 |
| chr1 | 2.13E+08 | 2.13E+08 | 396 | Promoter (2-3kb)    | ENSG00000234915 | -2212 |
| chr1 | 2.13E+08 | 2.13E+08 | 360 | Promoter (<=1kb)    | ENSG00000228067 | -245  |
| chr1 | 2.13E+08 | 2.13E+08 | 360 | Promoter (2-3kb)    | ENSG00000228067 | 2386  |
| chr1 | 2.13E+08 | 2.13E+08 | 396 | Promoter (1-2kb)    | ENSG00000237980 | 1078  |
| chr1 | 2.14E+08 | 2.14E+08 | 360 | Promoter (2-3kb)    | ENSG00000228255 | 2342  |
| chr1 | 2.14E+08 | 2.14E+08 | 360 | Promoter (<=1kb)    | ENSG00000230461 | 0     |
| chr1 | 2.14E+08 | 2.14E+08 | 396 | Promoter (2-3kb)    | ENSG00000230461 | 2238  |
| chr1 | 2.14E+08 | 2.14E+08 | 396 | Promoter (1-2kb)    | ENSG00000230461 | 1285  |
| chr1 | 2.14E+08 | 2.14E+08 | 360 | Promoter (1-2kb)    | ENSG00000230461 | 1252  |
| chr1 | 2.14E+08 | 2.14E+08 | 360 | Promoter (2-3kb)    | ENSG00000230461 | -2601 |
| chr1 | 2.14E+08 | 2.14E+08 | 396 | Promoter (<=1kb)    | ENSG00000230461 | -977  |
| chr1 | 2.14E+08 | 2.14E+08 | 396 | Promoter (1-2kb)    | ENSG00000230461 | -1178 |
| chr1 | 2.22E+08 | 2.22E+08 | 360 | Promoter (<=1kb)    | ENSG00000232679 | 105   |
| chr1 | 2.23E+08 | 2.23E+08 | 360 | Promoter (2-3kb)    | ENSG00000228106 | 2511  |
| chr1 | 2.23E+08 | 2.23E+08 | 360 | Promoter (2-3kb)    | ENSG00000228106 | -2160 |
| chr1 | 2.24E+08 | 2.24E+08 | 396 | Promoter (<=1kb)    | ENSG00000185495 | -874  |
| chr1 | 2.24E+08 | 2.24E+08 | 396 | Promoter (<=1kb)    | ENSG00000185495 | -635  |
| chr1 | 2.24E+08 | 2.24E+08 | 360 | Promoter (2-3kb)    | ENSG00000185495 | -2204 |
| chr1 | 2.24E+08 | 2.24E+08 | 396 | Promoter (<=1kb)    | ENSG00000232628 | 884   |
| chr1 | 2.24E+08 | 2.24E+08 | 360 | Promoter (1-2kb)    | ENSG00000237101 | -1967 |
| chr1 | 2.25E+08 | 2.25E+08 | 396 | Promoter (1-2kb)    | ENSG00000229400 | 1604  |
| chr1 | 2.26E+08 | 2.26E+08 | 396 | Promoter (<=1kb)    | ENSG00000234476 | 0     |
| chr1 | 2.26E+08 | 2.26E+08 | 396 | Promoter (<=1kb)    | ENSG00000226349 | 84    |
| chr1 | 2.26E+08 | 2.26E+08 | 360 | Promoter (<=1kb)    | ENSG00000226349 | -28   |
| chr1 | 2.26E+08 | 2.26E+08 | 396 | Promoter (<=1kb)    | ENSG00000226349 | -85   |
| chr1 | 2.26E+08 | 2.26E+08 | 360 | Promoter (1-2kb)    | ENSG00000226349 | -1523 |
| chr1 | 2.26E+08 | 2.26E+08 | 396 | Promoter (<=1kb)    | ENSG00000248322 | 0     |
| chr1 | 2.26E+08 | 2.26E+08 | 396 | Promoter (<=1kb)    | ENSG00000248322 | -179  |
| chr1 | 2.28E+08 | 2.28E+08 | 360 | Intron (ENST000004) | ENSG00000234277 | -4477 |
| chr1 | 2.28E+08 | 2.28E+08 | 360 | Promoter (<=1kb)    | ENSG00000269934 | -101  |
| chr1 | 2.28E+08 | 2.28E+08 | 360 | Promoter (<=1kb)    | ENSG00000270110 | 138   |
| chr1 | 2.28E+08 | 2.28E+08 | 360 | Promoter (<=1kb)    | ENSG00000270110 | 0     |
| chr1 | 2.29E+08 | 2.29E+08 | 396 | Promoter (1-2kb)    | ENSG00000236975 | 1293  |
| chr1 | 2.29E+08 | 2.29E+08 | 396 | Promoter (<=1kb)    | ENSG00000236975 | 0     |
| chr1 | 2.29E+08 | 2.29E+08 | 396 | Distal Intergenic   | ENSG00000236975 | -3013 |

|      |          |          |     |                     |                 |       |
|------|----------|----------|-----|---------------------|-----------------|-------|
| chr1 | 2.29E+08 | 2.29E+08 | 360 | Promoter (1-2kb)    | ENSG00000177788 | -1895 |
| chr1 | 2.29E+08 | 2.29E+08 | 396 | Promoter (1-2kb)    | ENSG00000177788 | -1940 |
| chr1 | 2.3E+08  | 2.3E+08  | 360 | Promoter (<=1kb)    | ENSG00000226920 | -578  |
| chr1 | 2.31E+08 | 2.31E+08 | 396 | Promoter (1-2kb)    | ENSG00000232964 | 1999  |
| chr1 | 2.31E+08 | 2.31E+08 | 360 | Promoter (1-2kb)    | ENSG00000232964 | 1957  |
| chr1 | 2.31E+08 | 2.31E+08 | 360 | Promoter (1-2kb)    | ENSG00000232964 | 1758  |
| chr1 | 2.31E+08 | 2.31E+08 | 360 | Promoter (<=1kb)    | ENSG00000232964 | 0     |
| chr1 | 2.31E+08 | 2.31E+08 | 396 | Promoter (<=1kb)    | ENSG00000232964 | -997  |
| chr1 | 2.31E+08 | 2.31E+08 | 396 | Distal Intergenic   | ENSG00000225656 | -3393 |
| chr1 | 2.32E+08 | 2.32E+08 | 360 | Promoter (<=1kb)    | ENSG00000233461 | 0     |
| chr1 | 2.32E+08 | 2.32E+08 | 396 | Promoter (2-3kb)    | ENSG00000233461 | -2917 |
| chr1 | 2.34E+08 | 2.34E+08 | 360 | Promoter (1-2kb)    | ENSG00000236244 | 1828  |
| chr1 | 2.34E+08 | 2.34E+08 | 360 | Distal Intergenic   | ENSG00000236358 | -3062 |
| chr1 | 2.35E+08 | 2.35E+08 | 360 | Promoter (<=1kb)    | ENSG00000231768 | -570  |
| chr1 | 2.35E+08 | 2.35E+08 | 396 | Distal Intergenic   | ENSG00000231768 | -3280 |
| chr1 | 2.35E+08 | 2.35E+08 | 396 | Promoter (2-3kb)    | ENSG00000230404 | 2512  |
| chr1 | 2.35E+08 | 2.35E+08 | 396 | Promoter (<=1kb)    | ENSG00000224939 | -463  |
| chr1 | 2.35E+08 | 2.35E+08 | 360 | Promoter (1-2kb)    | ENSG00000224939 | 1401  |
| chr1 | 2.35E+08 | 2.35E+08 | 396 | Promoter (2-3kb)    | ENSG00000272362 | -2346 |
| chr1 | 2.35E+08 | 2.35E+08 | 396 | Promoter (<=1kb)    | ENSG00000272362 | 169   |
| chr1 | 2.35E+08 | 2.35E+08 | 360 | Promoter (<=1kb)    | ENSG00000272362 | 216   |
| chr1 | 2.35E+08 | 2.35E+08 | 360 | Promoter (<=1kb)    | ENSG00000272362 | 430   |
| chr1 | 2.35E+08 | 2.35E+08 | 396 | Promoter (<=1kb)    | ENSG00000272362 | 442   |
| chr1 | 2.35E+08 | 2.35E+08 | 360 | Promoter (1-2kb)    | ENSG00000230628 | 1750  |
| chr1 | 2.35E+08 | 2.35E+08 | 360 | Promoter (1-2kb)    | ENSG00000230628 | 1525  |
| chr1 | 2.35E+08 | 2.35E+08 | 396 | Intron (ENST000004) | ENSG00000227630 | -4834 |
| chr1 | 2.35E+08 | 2.35E+08 | 360 | Promoter (2-3kb)    | ENSG00000227630 | -2967 |
| chr1 | 2.35E+08 | 2.35E+08 | 360 | Promoter (2-3kb)    | ENSG00000227630 | 2916  |
| chr1 | 2.35E+08 | 2.35E+08 | 396 | Promoter (2-3kb)    | ENSG00000227630 | 2933  |
| chr1 | 2.35E+08 | 2.35E+08 | 360 | Promoter (<=1kb)    | ENSG00000237520 | 550   |
| chr1 | 2.35E+08 | 2.35E+08 | 396 | Promoter (<=1kb)    | ENSG00000238005 | 974   |
| chr1 | 2.35E+08 | 2.35E+08 | 396 | Promoter (<=1kb)    | ENSG00000238005 | 0     |
| chr1 | 2.35E+08 | 2.35E+08 | 360 | Promoter (1-2kb)    | ENSG00000238005 | 1313  |
| chr1 | 2.35E+08 | 2.35E+08 | 360 | Promoter (1-2kb)    | ENSG00000238005 | -1442 |
| chr1 | 2.35E+08 | 2.35E+08 | 360 | Promoter (2-3kb)    | ENSG00000232686 | -2020 |
| chr1 | 2.36E+08 | 2.36E+08 | 396 | Promoter (2-3kb)    | ENSG00000229291 | 2289  |
| chr1 | 2.36E+08 | 2.36E+08 | 360 | Promoter (2-3kb)    | ENSG00000229291 | -2780 |
| chr1 | 2.36E+08 | 2.36E+08 | 396 | Distal Intergenic   | ENSG00000229291 | -4799 |
| chr1 | 2.4E+08  | 2.4E+08  | 360 | Promoter (1-2kb)    | ENSG00000233355 | -1193 |
| chr1 | 2.4E+08  | 2.4E+08  | 360 | Promoter (1-2kb)    | ENSG00000233355 | -1286 |
| chr1 | 2.4E+08  | 2.4E+08  | 360 | Distal Intergenic   | ENSG00000234601 | -3586 |
| chr1 | 2.43E+08 | 2.43E+08 | 396 | Promoter (<=1kb)    | ENSG00000231512 | 889   |
| chr1 | 2.43E+08 | 2.43E+08 | 396 | Promoter (<=1kb)    | ENSG00000214837 | 0     |
| chr1 | 2.43E+08 | 2.43E+08 | 396 | Promoter (<=1kb)    | ENSG00000214837 | 0     |
| chr1 | 2.43E+08 | 2.43E+08 | 360 | Promoter (<=1kb)    | ENSG00000214837 | -250  |
| chr1 | 2.43E+08 | 2.43E+08 | 360 | Distal Intergenic   | ENSG00000227230 | -3816 |
| chr1 | 2.43E+08 | 2.43E+08 | 360 | Promoter (2-3kb)    | ENSG00000232085 | -2172 |
| chr1 | 2.46E+08 | 2.46E+08 | 396 | Distal Intergenic   | ENSG00000235096 | -4994 |
| chr1 | 2.46E+08 | 2.46E+08 | 396 | Distal Intergenic   | ENSG00000235096 | -4792 |
| chr1 | 2.46E+08 | 2.46E+08 | 396 | Promoter (1-2kb)    | ENSG00000230184 | -1186 |
| chr1 | 2.47E+08 | 2.47E+08 | 360 | Promoter (2-3kb)    | ENSG00000242042 | 2390  |
| chr1 | 2.47E+08 | 2.47E+08 | 360 | Promoter (2-3kb)    | ENSG00000242042 | -2053 |
| chr1 | 2.47E+08 | 2.47E+08 | 396 | Distal Intergenic   | ENSG00000260855 | -4192 |
| chr1 | 2.47E+08 | 2.47E+08 | 396 | Distal Intergenic   | ENSG00000260855 | -3558 |
| chr1 | 2.47E+08 | 2.47E+08 | 360 | Distal Intergenic   | ENSG00000260855 | -3581 |
| chr1 | 2.47E+08 | 2.47E+08 | 360 | Promoter (1-2kb)    | ENSG00000260855 | -1608 |
| chr1 | 2.49E+08 | 2.49E+08 | 396 | Promoter (2-3kb)    | ENSG00000229703 | 2432  |
| chr1 | 2.49E+08 | 2.49E+08 | 360 | Promoter (2-3kb)    | ENSG00000229703 | 2452  |

|      |          |          |     |                     |                 |       |
|------|----------|----------|-----|---------------------|-----------------|-------|
| chr1 | 2.49E+08 | 2.49E+08 | 396 | Promoter (<=1kb)    | ENSG00000232694 | 0     |
| chr2 | 193398   | 193793   | 396 | Distal Intergenic   | ENSG00000227061 | -3776 |
| chr2 | 193687   | 194082   | 396 | Distal Intergenic   | ENSG00000227061 | -3487 |
| chr2 | 281459   | 281854   | 396 | Distal Intergenic   | ENSG00000228643 | -4565 |
| chr2 | 285720   | 286079   | 360 | Promoter (<=1kb)    | ENSG00000228643 | -340  |
| chr2 | 285932   | 286327   | 396 | Promoter (<=1kb)    | ENSG00000228643 | -92   |
| chr2 | 316159   | 316554   | 396 | Promoter (1-2kb)    | ENSG00000233684 | -1358 |
| chr2 | 385172   | 385567   | 396 | Promoter (2-3kb)    | ENSG00000236856 | -2845 |
| chr2 | 555374   | 555769   | 396 | Promoter (2-3kb)    | ENSG00000233633 | -2435 |
| chr2 | 676511   | 676870   | 360 | Promoter (<=1kb)    | ENSG00000233296 | -316  |
| chr2 | 677207   | 677566   | 360 | Promoter (<=1kb)    | ENSG00000233296 | 21    |
| chr2 | 677316   | 677711   | 396 | Promoter (<=1kb)    | ENSG00000233296 | 130   |
| chr2 | 677515   | 677910   | 396 | Promoter (<=1kb)    | ENSG00000233296 | 329   |
| chr2 | 729610   | 729969   | 360 | Promoter (1-2kb)    | ENSG00000227713 | 1226  |
| chr2 | 1830931  | 1831290  | 360 | Promoter (2-3kb)    | ENSG00000232057 | 2747  |
| chr2 | 2842682  | 2843077  | 396 | Promoter (<=1kb)    | ENSG00000237720 | -519  |
| chr2 | 3518417  | 3518812  | 396 | Distal Intergenic   | ENSG00000235078 | -4234 |
| chr2 | 3518579  | 3518938  | 360 | Distal Intergenic   | ENSG00000235078 | -4108 |
| chr2 | 3518616  | 3519011  | 396 | Distal Intergenic   | ENSG00000235078 | -4035 |
| chr2 | 3519185  | 3519580  | 396 | Distal Intergenic   | ENSG00000235078 | -3466 |
| chr2 | 3519332  | 3519691  | 360 | Distal Intergenic   | ENSG00000235078 | -3355 |
| chr2 | 3519463  | 3519858  | 396 | Distal Intergenic   | ENSG00000235078 | -3188 |
| chr2 | 3519545  | 3519904  | 360 | Distal Intergenic   | ENSG00000235078 | -3142 |
| chr2 | 3524979  | 3525338  | 360 | Promoter (1-2kb)    | ENSG00000235078 | 1933  |
| chr2 | 3585571  | 3585966  | 396 | Promoter (1-2kb)    | ENSG00000242282 | -1108 |
| chr2 | 3585772  | 3586131  | 360 | Promoter (1-2kb)    | ENSG00000242282 | -1309 |
| chr2 | 3606844  | 3607203  | 360 | Promoter (<=1kb)    | ENSG00000234171 | 676   |
| chr2 | 3608874  | 3609269  | 396 | Promoter (2-3kb)    | ENSG00000234171 | 2706  |
| chr2 | 3652142  | 3652537  | 396 | Promoter (<=1kb)    | ENSG00000237370 | -310  |
| chr2 | 3652196  | 3652555  | 360 | Promoter (<=1kb)    | ENSG00000237370 | -364  |
| chr2 | 3652464  | 3652823  | 360 | Promoter (<=1kb)    | ENSG00000237370 | -632  |
| chr2 | 3750309  | 3750668  | 360 | Promoter (1-2kb)    | ENSG00000224661 | 1075  |
| chr2 | 3887897  | 3888256  | 360 | Distal Intergenic   | ENSG00000227363 | -3518 |
| chr2 | 4704506  | 4704901  | 396 | Promoter (<=1kb)    | ENSG00000231532 | -701  |
| chr2 | 5835809  | 5836168  | 360 | Promoter (<=1kb)    | ENSG00000242540 | -184  |
| chr2 | 6123130  | 6123489  | 360 | Promoter (<=1kb)    | ENSG00000232044 | 427   |
| chr2 | 6773124  | 6773519  | 396 | Promoter (<=1kb)    | ENSG00000236172 | 324   |
| chr2 | 6907071  | 6907466  | 396 | Promoter (2-3kb)    | ENSG00000205837 | 2976  |
| chr2 | 6971697  | 6972056  | 360 | Promoter (1-2kb)    | ENSG00000225964 | 1606  |
| chr2 | 6975859  | 6976254  | 396 | Promoter (2-3kb)    | ENSG00000225964 | -2197 |
| chr2 | 6976102  | 6976497  | 396 | Promoter (2-3kb)    | ENSG00000225964 | -2440 |
| chr2 | 7809515  | 7809910  | 396 | Promoter (2-3kb)    | ENSG00000230515 | 2467  |
| chr2 | 8121393  | 8121752  | 360 | Promoter (1-2kb)    | ENSG00000235665 | -1952 |
| chr2 | 8122958  | 8123353  | 396 | Intron (ENST000004) | ENSG00000235665 | -3517 |
| chr2 | 8259065  | 8259424  | 360 | Promoter (<=1kb)    | ENSG00000236790 | -611  |
| chr2 | 8259267  | 8259626  | 360 | Promoter (<=1kb)    | ENSG00000236790 | -813  |
| chr2 | 8420831  | 8421190  | 360 | Promoter (2-3kb)    | ENSG00000235665 | -2617 |
| chr2 | 8715708  | 8716067  | 360 | Promoter (<=1kb)    | ENSG00000231435 | -77   |
| chr2 | 8717667  | 8718026  | 360 | Promoter (<=1kb)    | ENSG00000236008 | -582  |
| chr2 | 8767088  | 8767483  | 396 | Distal Intergenic   | ENSG00000231083 | -4016 |
| chr2 | 9246350  | 9246745  | 396 | Promoter (<=1kb)    | ENSG00000261104 | 0     |
| chr2 | 9248424  | 9248819  | 396 | Promoter (1-2kb)    | ENSG00000261104 | 1702  |
| chr2 | 9251861  | 9252256  | 396 | Distal Intergenic   | ENSG00000244310 | -3070 |
| chr2 | 9255490  | 9255849  | 360 | Promoter (<=1kb)    | ENSG00000244310 | 164   |
| chr2 | 9647960  | 9648319  | 360 | Promoter (2-3kb)    | ENSG00000239300 | 2386  |
| chr2 | 9698146  | 9698505  | 360 | Promoter (2-3kb)    | ENSG00000271855 | 2118  |
| chr2 | 9779840  | 9780199  | 360 | Promoter (<=1kb)    | ENSG00000240687 | 939   |
| chr2 | 9812504  | 9812863  | 360 | Promoter (1-2kb)    | ENSG00000244260 | -1289 |

|      |          |          |     |                   |                 |       |
|------|----------|----------|-----|-------------------|-----------------|-------|
| chr2 | 9914562  | 9914957  | 396 | Distal Intergenic | ENSG00000243491 | -4092 |
| chr2 | 10072526 | 10072921 | 396 | Distal Intergenic | ENSG00000269973 | -3568 |
| chr2 | 10196864 | 10197223 | 360 | Promoter (1-2kb)  | ENSG00000271787 | -1871 |
| chr2 | 10260130 | 10260489 | 360 | Promoter (<=1kb)  | ENSG00000272524 | -372  |
| chr2 | 11505615 | 11506010 | 396 | Promoter (<=1kb)  | ENSG00000230952 | 0     |
| chr2 | 11505820 | 11506179 | 360 | Promoter (<=1kb)  | ENSG00000230952 | -58   |
| chr2 | 11510348 | 11510707 | 360 | Distal Intergenic | ENSG00000230952 | -4586 |
| chr2 | 11533287 | 11533682 | 396 | Promoter (<=1kb)  | ENSG00000224177 | -425  |
| chr2 | 11533501 | 11533896 | 396 | Promoter (<=1kb)  | ENSG00000224177 | -211  |
| chr2 | 11534209 | 11534568 | 360 | Promoter (<=1kb)  | ENSG00000224177 | 102   |
| chr2 | 11535949 | 11536344 | 396 | Promoter (1-2kb)  | ENSG00000224177 | 1842  |
| chr2 | 11536035 | 11536394 | 360 | Promoter (1-2kb)  | ENSG00000224177 | 1928  |
| chr2 | 11536271 | 11536666 | 396 | Promoter (2-3kb)  | ENSG00000224177 | 2164  |
| chr2 | 11536750 | 11537145 | 396 | Promoter (1-2kb)  | ENSG00000224177 | -1983 |
| chr2 | 11539724 | 11540119 | 396 | Promoter (<=1kb)  | ENSG00000224177 | 429   |
| chr2 | 11539974 | 11540333 | 360 | Promoter (<=1kb)  | ENSG00000224177 | 679   |
| chr2 | 11539994 | 11540389 | 396 | Promoter (<=1kb)  | ENSG00000224177 | 699   |
| chr2 | 11540185 | 11540544 | 360 | Promoter (<=1kb)  | ENSG00000224177 | 890   |
| chr2 | 11817880 | 11818275 | 396 | Distal Intergenic | ENSG00000228496 | -3311 |
| chr2 | 11819160 | 11819555 | 396 | Promoter (2-3kb)  | ENSG00000228496 | -2031 |
| chr2 | 11822386 | 11822781 | 396 | Promoter (<=1kb)  | ENSG00000228496 | 799   |
| chr2 | 11822908 | 11823303 | 396 | Promoter (1-2kb)  | ENSG00000228496 | 1321  |
| chr2 | 11822955 | 11823314 | 360 | Promoter (1-2kb)  | ENSG00000228496 | 1368  |
| chr2 | 11823950 | 11824309 | 360 | Promoter (2-3kb)  | ENSG00000228496 | 2363  |
| chr2 | 12148111 | 12148470 | 360 | Promoter (<=1kb)  | ENSG00000224184 | 811   |
| chr2 | 12148339 | 12148698 | 360 | Promoter (1-2kb)  | ENSG00000224184 | 1039  |
| chr2 | 12456416 | 12456811 | 396 | Promoter (1-2kb)  | ENSG00000224184 | 1973  |
| chr2 | 13677439 | 13677834 | 396 | Promoter (<=1kb)  | ENSG00000229370 | 0     |
| chr2 | 15824938 | 15825297 | 360 | Distal Intergenic | ENSG00000224194 | -4330 |
| chr2 | 16056580 | 16056975 | 396 | Distal Intergenic | ENSG00000223850 | -3546 |
| chr2 | 16201942 | 16202301 | 360 | Promoter (<=1kb)  | ENSG00000226764 | 706   |
| chr2 | 16250139 | 16250534 | 396 | Distal Intergenic | ENSG00000236989 | -4176 |
| chr2 | 16533607 | 16533966 | 360 | Promoter (1-2kb)  | ENSG00000224400 | -1558 |
| chr2 | 18731404 | 18731799 | 396 | Promoter (1-2kb)  | ENSG00000260331 | -1934 |
| chr2 | 19503338 | 19503733 | 396 | Promoter (2-3kb)  | ENSG00000236204 | 2065  |
| chr2 | 19503947 | 19504306 | 360 | Promoter (1-2kb)  | ENSG00000236204 | 1492  |
| chr2 | 19504405 | 19504800 | 396 | Promoter (<=1kb)  | ENSG00000236204 | 998   |
| chr2 | 19504422 | 19504781 | 360 | Promoter (1-2kb)  | ENSG00000236204 | 1017  |
| chr2 | 19504660 | 19505019 | 360 | Promoter (<=1kb)  | ENSG00000236204 | 779   |
| chr2 | 19505651 | 19506046 | 396 | Promoter (<=1kb)  | ENSG00000236204 | 0     |
| chr2 | 19505852 | 19506247 | 396 | Promoter (<=1kb)  | ENSG00000236204 | -37   |
| chr2 | 19666759 | 19667154 | 396 | Promoter (1-2kb)  | ENSG00000234597 | 1568  |
| chr2 | 19666992 | 19667387 | 396 | Promoter (1-2kb)  | ENSG00000234597 | 1335  |
| chr2 | 19908835 | 19909230 | 396 | Promoter (2-3kb)  | ENSG00000235911 | -2246 |
| chr2 | 19913147 | 19913506 | 360 | Promoter (1-2kb)  | ENSG00000235911 | 1671  |
| chr2 | 20066164 | 20066523 | 360 | Promoter (2-3kb)  | ENSG00000228784 | -2098 |
| chr2 | 20068401 | 20068796 | 396 | Promoter (<=1kb)  | ENSG00000228784 | 0     |
| chr2 | 20068654 | 20069049 | 396 | Promoter (<=1kb)  | ENSG00000228784 | 2     |
| chr2 | 20098137 | 20098532 | 396 | Distal Intergenic | ENSG00000271991 | -3254 |
| chr2 | 20187283 | 20187678 | 396 | Promoter (2-3kb)  | ENSG00000227210 | -2300 |
| chr2 | 20308965 | 20309324 | 360 | Promoter (2-3kb)  | ENSG00000234378 | -2375 |
| chr2 | 20650405 | 20650800 | 396 | Promoter (<=1kb)  | ENSG00000228950 | -3    |
| chr2 | 20651023 | 20651418 | 396 | Promoter (<=1kb)  | ENSG00000228950 | 220   |
| chr2 | 20651235 | 20651630 | 396 | Promoter (<=1kb)  | ENSG00000228950 | 432   |
| chr2 | 20651247 | 20651606 | 360 | Promoter (<=1kb)  | ENSG00000228950 | 444   |
| chr2 | 20699421 | 20699816 | 396 | Promoter (1-2kb)  | ENSG00000227047 | 1255  |
| chr2 | 21056369 | 21056728 | 360 | Promoter (2-3kb)  | ENSG00000236436 | -2803 |
| chr2 | 21056442 | 21056837 | 396 | Promoter (2-3kb)  | ENSG00000236436 | -2694 |

|      |          |          |     |                      |                 |       |
|------|----------|----------|-----|----------------------|-----------------|-------|
| chr2 | 21224024 | 21224419 | 396 | Promoter (<=1kb)     | ENSG00000261012 | -235  |
| chr2 | 23558952 | 23559311 | 360 | Distal Intergenic    | ENSG00000223530 | -4037 |
| chr2 | 24399485 | 24399880 | 396 | Promoter (1-2kb)     | ENSG00000232642 | -1611 |
| chr2 | 24399826 | 24400221 | 396 | Promoter (1-2kb)     | ENSG00000232642 | -1952 |
| chr2 | 24400119 | 24400514 | 396 | Promoter (2-3kb)     | ENSG00000232642 | -2245 |
| chr2 | 24401671 | 24402066 | 396 | Distal Intergenic    | ENSG00000232642 | -3797 |
| chr2 | 24401937 | 24402332 | 396 | Distal Intergenic    | ENSG00000232642 | -4063 |
| chr2 | 24402655 | 24403014 | 360 | Distal Intergenic    | ENSG00000232642 | -4781 |
| chr2 | 25196465 | 25196860 | 396 | Promoter (1-2kb)     | ENSG00000224165 | 1413  |
| chr2 | 25197543 | 25197938 | 396 | Promoter (2-3kb)     | ENSG00000224165 | 2491  |
| chr2 | 25376100 | 25376459 | 360 | Distal Intergenic    | ENSG00000261452 | -3604 |
| chr2 | 27287281 | 27287676 | 396 | Promoter (1-2kb)     | ENSG00000272148 | -1506 |
| chr2 | 27287498 | 27287893 | 396 | Promoter (1-2kb)     | ENSG00000272148 | -1723 |
| chr2 | 27582827 | 27583222 | 396 | Promoter (2-3kb)     | ENSG00000234072 | 2772  |
| chr2 | 27583010 | 27583369 | 360 | Promoter (2-3kb)     | ENSG00000234072 | 2955  |
| chr2 | 27583036 | 27583431 | 396 | Promoter (2-3kb)     | ENSG00000234072 | 2981  |
| chr2 | 28647589 | 28647948 | 360 | Promoter (<=1kb)     | ENSG00000270210 | -864  |
| chr2 | 30363601 | 30363960 | 360 | Promoter (<=1kb)     | ENSG00000233862 | -69   |
| chr2 | 32075118 | 32075513 | 396 | Promoter (2-3kb)     | ENSG00000273165 | 2979  |
| chr2 | 32388622 | 32388981 | 360 | Promoter (1-2kb)     | ENSG00000272716 | 1845  |
| chr2 | 33068801 | 33069196 | 396 | Promoter (2-3kb)     | ENSG00000230876 | 2720  |
| chr2 | 33928046 | 33928441 | 396 | Distal Intergenic    | ENSG00000203386 | -3512 |
| chr2 | 36739744 | 36740103 | 360 | Promoter (<=1kb)     | ENSG00000273090 | 772   |
| chr2 | 36740001 | 36740360 | 360 | Promoter (<=1kb)     | ENSG00000273090 | 515   |
| chr2 | 36740556 | 36740915 | 360 | Promoter (<=1kb)     | ENSG00000273090 | 0     |
| chr2 | 37825662 | 37826057 | 396 | Promoter (1-2kb)     | ENSG00000236213 | -1222 |
| chr2 | 37826130 | 37826525 | 396 | Promoter (<=1kb)     | ENSG00000236213 | -754  |
| chr2 | 37826184 | 37826543 | 360 | Promoter (<=1kb)     | ENSG00000236213 | -736  |
| chr2 | 37967790 | 37968149 | 360 | Distal Intergenic    | ENSG00000236572 | -3327 |
| chr2 | 38054809 | 38055204 | 396 | Promoter (1-2kb)     | ENSG00000237803 | 1371  |
| chr2 | 38102612 | 38102971 | 360 | Promoter (<=1kb)     | ENSG00000237803 | 35    |
| chr2 | 38295701 | 38296060 | 360 | Promoter (1-2kb)     | ENSG00000235848 | -1517 |
| chr2 | 38344060 | 38344455 | 396 | Promoter (1-2kb)     | ENSG00000232973 | 1477  |
| chr2 | 38344286 | 38344681 | 396 | Promoter (1-2kb)     | ENSG00000232973 | -1359 |
| chr2 | 38354849 | 38355244 | 396 | Intron (ENST000004:) | ENSG00000232973 | -3003 |
| chr2 | 38355049 | 38355444 | 396 | Promoter (2-3kb)     | ENSG00000232973 | -2803 |
| chr2 | 38420665 | 38421060 | 396 | Promoter (<=1kb)     | ENSG00000273006 | 175   |
| chr2 | 38465196 | 38465591 | 396 | Promoter (1-2kb)     | ENSG00000227292 | 1141  |
| chr2 | 38654562 | 38654957 | 396 | Intron (ENST000004:) | ENSG00000235009 | -3479 |
| chr2 | 38659487 | 38659846 | 360 | Promoter (1-2kb)     | ENSG00000235009 | 1051  |
| chr2 | 38697651 | 38698010 | 360 | Promoter (1-2kb)     | ENSG00000231367 | -1068 |
| chr2 | 38740986 | 38741345 | 360 | Promoter (1-2kb)     | ENSG00000231367 | 1537  |
| chr2 | 38742965 | 38743360 | 396 | Promoter (<=1kb)     | ENSG00000231367 | -83   |
| chr2 | 38745303 | 38745662 | 360 | Promoter (2-3kb)     | ENSG00000231367 | -2421 |
| chr2 | 39085716 | 39086075 | 360 | Promoter (2-3kb)     | ENSG00000225284 | -2787 |
| chr2 | 39547769 | 39548128 | 360 | Promoter (2-3kb)     | ENSG00000273035 | 2817  |
| chr2 | 39550705 | 39551064 | 360 | Promoter (<=1kb)     | ENSG00000273035 | 0     |
| chr2 | 39550795 | 39551190 | 396 | Promoter (<=1kb)     | ENSG00000273035 | 0     |
| chr2 | 39554005 | 39554400 | 396 | Distal Intergenic    | ENSG00000273035 | -3060 |
| chr2 | 39554215 | 39554610 | 396 | Distal Intergenic    | ENSG00000273035 | -3270 |
| chr2 | 40148444 | 40148803 | 360 | Promoter (1-2kb)     | ENSG00000227028 | 1611  |
| chr2 | 40149627 | 40150022 | 396 | Promoter (2-3kb)     | ENSG00000227028 | 2794  |
| chr2 | 42105040 | 42105435 | 396 | Promoter (<=1kb)     | ENSG00000214691 | 344   |
| chr2 | 42105188 | 42105547 | 360 | Promoter (<=1kb)     | ENSG00000214691 | 492   |
| chr2 | 42105329 | 42105724 | 396 | Promoter (<=1kb)     | ENSG00000214691 | 633   |
| chr2 | 42105936 | 42106331 | 396 | Promoter (1-2kb)     | ENSG00000214691 | 1240  |
| chr2 | 42106712 | 42107071 | 360 | Promoter (2-3kb)     | ENSG00000214691 | 2016  |
| chr2 | 42107590 | 42107985 | 396 | Promoter (2-3kb)     | ENSG00000214691 | 2894  |



|      |          |          |     |                   |                 |       |
|------|----------|----------|-----|-------------------|-----------------|-------|
| chr2 | 42164160 | 42164519 | 360 | Distal Intergenic | ENSG00000234362 | -3297 |
| chr2 | 42254064 | 42254423 | 360 | Promoter (1-2kb)  | ENSG00000226398 | -1622 |
| chr2 | 43230630 | 43230989 | 360 | Promoter (2-3kb)  | ENSG00000224739 | 2211  |
| chr2 | 43233933 | 43234328 | 396 | Promoter (<=1kb)  | ENSG00000224739 | -733  |
| chr2 | 43326873 | 43327232 | 360 | Promoter (2-3kb)  | ENSG00000230587 | 2597  |
| chr2 | 45237798 | 45238157 | 360 | Promoter (2-3kb)  | ENSG00000231156 | 2650  |
| chr2 | 45391316 | 45391675 | 360 | Downstream (<1kb) | ENSG00000231054 | -4047 |
| chr2 | 46307186 | 46307545 | 360 | Promoter (1-2kb)  | ENSG00000232696 | -1219 |
| chr2 | 46307476 | 46307871 | 396 | Promoter (1-2kb)  | ENSG00000232696 | -1509 |
| chr2 | 46394702 | 46395097 | 396 | Promoter (<=1kb)  | ENSG00000231336 | 20    |
| chr2 | 46395882 | 46396277 | 396 | Promoter (<=1kb)  | ENSG00000231336 | -765  |
| chr2 | 46620170 | 46620565 | 396 | Promoter (<=1kb)  | ENSG00000228100 | 741   |
| chr2 | 47078914 | 47079273 | 360 | Promoter (1-2kb)  | ENSG00000226548 | 1362  |
| chr2 | 47079113 | 47079472 | 360 | Promoter (1-2kb)  | ENSG00000226548 | 1163  |
| chr2 | 47129193 | 47129588 | 396 | Promoter (2-3kb)  | ENSG00000228925 | 2779  |
| chr2 | 47187802 | 47188161 | 360 | Distal Intergenic | ENSG00000272814 | -3775 |
| chr2 | 47188004 | 47188363 | 360 | Distal Intergenic | ENSG00000272814 | -3977 |
| chr2 | 47264986 | 47265345 | 360 | Promoter (2-3kb)  | ENSG00000233845 | 2318  |
| chr2 | 47265499 | 47265858 | 360 | Promoter (1-2kb)  | ENSG00000233845 | 1805  |
| chr2 | 47571249 | 47571644 | 396 | Promoter (<=1kb)  | ENSG00000234690 | 461   |
| chr2 | 47576887 | 47577282 | 396 | Distal Intergenic | ENSG00000234690 | -4674 |
| chr2 | 47752467 | 47752826 | 360 | Promoter (1-2kb)  | ENSG00000235760 | -1850 |
| chr2 | 47752671 | 47753030 | 360 | Promoter (1-2kb)  | ENSG00000235760 | -1646 |
| chr2 | 47752926 | 47753321 | 396 | Promoter (1-2kb)  | ENSG00000235760 | -1355 |
| chr2 | 48136822 | 48137217 | 396 | Promoter (2-3kb)  | ENSG00000233230 | 2853  |
| chr2 | 48392790 | 48393185 | 396 | Promoter (<=1kb)  | ENSG00000230773 | -717  |
| chr2 | 53093167 | 53093562 | 396 | Promoter (1-2kb)  | ENSG00000232604 | 1794  |
| chr2 | 53134901 | 53135296 | 396 | Promoter (1-2kb)  | ENSG00000228033 | 1862  |
| chr2 | 54974386 | 54974745 | 360 | Promoter (<=1kb)  | ENSG00000231334 | 796   |
| chr2 | 55536400 | 55536759 | 360 | Promoter (<=1kb)  | ENSG00000240401 | 772   |
| chr2 | 55536628 | 55536987 | 360 | Promoter (<=1kb)  | ENSG00000240401 | 1000  |
| chr2 | 55841930 | 55842325 | 396 | Promoter (2-3kb)  | ENSG00000272606 | -2719 |
| chr2 | 55843059 | 55843418 | 360 | Promoter (1-2kb)  | ENSG00000272606 | -1626 |
| chr2 | 55843289 | 55843648 | 360 | Promoter (1-2kb)  | ENSG00000272606 | -1396 |
| chr2 | 55845616 | 55845975 | 360 | Promoter (<=1kb)  | ENSG00000272606 | 572   |
| chr2 | 58747197 | 58747592 | 396 | Promoter (<=1kb)  | ENSG00000233723 | -296  |
| chr2 | 60582010 | 60582369 | 360 | Promoter (1-2kb)  | ENSG00000228590 | -1859 |
| chr2 | 60725596 | 60725955 | 360 | Promoter (2-3kb)  | ENSG00000233953 | 2775  |
| chr2 | 61392174 | 61392533 | 360 | Promoter (2-3kb)  | ENSG00000271889 | -2934 |
| chr2 | 61700816 | 61701211 | 396 | Promoter (2-3kb)  | ENSG00000270820 | 2226  |
| chr2 | 61707834 | 61708229 | 396 | Promoter (2-3kb)  | ENSG00000270820 | -2279 |
| chr2 | 61712952 | 61713347 | 396 | Promoter (2-3kb)  | ENSG00000270820 | 2444  |
| chr2 | 62377542 | 62377901 | 360 | Distal Intergenic | ENSG00000229839 | -3526 |
| chr2 | 62690893 | 62691252 | 360 | Promoter (<=1kb)  | ENSG00000228541 | 631   |
| chr2 | 62691100 | 62691459 | 360 | Promoter (<=1kb)  | ENSG00000228541 | 838   |
| chr2 | 62886632 | 62887027 | 396 | Promoter (2-3kb)  | ENSG00000226622 | 2736  |
| chr2 | 63083003 | 63083398 | 396 | Promoter (2-3kb)  | ENSG00000226605 | 2175  |
| chr2 | 63083223 | 63083618 | 396 | Promoter (1-2kb)  | ENSG00000226605 | 1955  |
| chr2 | 63276656 | 63277051 | 396 | Promoter (<=1kb)  | ENSG00000231609 | -881  |
| chr2 | 64435295 | 64435690 | 396 | Promoter (1-2kb)  | ENSG00000225889 | 1186  |
| chr2 | 64453471 | 64453830 | 360 | Promoter (1-2kb)  | ENSG00000225889 | -1165 |
| chr2 | 64685242 | 64685637 | 396 | Distal Intergenic | ENSG00000223935 | -4310 |
| chr2 | 64685420 | 64685779 | 360 | Distal Intergenic | ENSG00000223935 | -4488 |
| chr2 | 64685495 | 64685890 | 396 | Distal Intergenic | ENSG00000223935 | -4563 |
| chr2 | 64831228 | 64831623 | 396 | Promoter (2-3kb)  | ENSG00000233694 | -2486 |
| chr2 | 64831474 | 64831833 | 360 | Promoter (2-3kb)  | ENSG00000233694 | -2276 |
| chr2 | 64831482 | 64831877 | 396 | Promoter (2-3kb)  | ENSG00000233694 | -2232 |
| chr2 | 64831700 | 64832059 | 360 | Promoter (2-3kb)  | ENSG00000233694 | -2050 |

|      |          |          |     |                     |                 |       |
|------|----------|----------|-----|---------------------|-----------------|-------|
| chr2 | 64836993 | 64837352 | 360 | Promoter (2-3kb)    | ENSG00000233694 | 2498  |
| chr2 | 64873564 | 64873923 | 360 | Promoter (1-2kb)    | ENSG00000226756 | 1818  |
| chr2 | 64873573 | 64873968 | 396 | Promoter (1-2kb)    | ENSG00000226756 | 1827  |
| chr2 | 65129904 | 65130299 | 396 | Promoter (1-2kb)    | ENSG00000237638 | 1972  |
| chr2 | 65132841 | 65133200 | 360 | Promoter (<=1kb)    | ENSG00000237638 | -570  |
| chr2 | 65268781 | 65269176 | 396 | Distal Intergenic   | ENSG00000232613 | -4150 |
| chr2 | 65605845 | 65606240 | 396 | Promoter (1-2kb)    | ENSG00000232693 | 1579  |
| chr2 | 65610870 | 65611229 | 360 | Distal Intergenic   | ENSG00000232693 | -3051 |
| chr2 | 66124865 | 66125260 | 396 | Promoter (<=1kb)    | ENSG00000204929 | 109   |
| chr2 | 66803026 | 66803385 | 360 | Promoter (1-2kb)    | ENSG00000232046 | 1864  |
| chr2 | 67315191 | 67315550 | 360 | Promoter (1-2kb)    | ENSG00000230906 | 1046  |
| chr2 | 67407101 | 67407496 | 396 | Promoter (1-2kb)    | ENSG00000236780 | -1977 |
| chr2 | 68053426 | 68053785 | 360 | Promoter (<=1kb)    | ENSG00000237013 | -732  |
| chr2 | 68476413 | 68476808 | 396 | Distal Intergenic   | ENSG00000273064 | -3194 |
| chr2 | 68482659 | 68483054 | 396 | Promoter (2-3kb)    | ENSG00000273064 | 2657  |
| chr2 | 69058467 | 69058862 | 396 | Promoter (<=1kb)    | ENSG00000237576 | -314  |
| chr2 | 69061766 | 69062161 | 396 | Promoter (<=1kb)    | ENSG00000237576 | 0     |
| chr2 | 69944232 | 69944627 | 396 | Distal Intergenic   | ENSG00000231024 | -3253 |
| chr2 | 70190234 | 70190593 | 360 | Promoter (1-2kb)    | ENSG00000179818 | 1313  |
| chr2 | 70190268 | 70190663 | 396 | Promoter (1-2kb)    | ENSG00000179818 | 1243  |
| chr2 | 70190473 | 70190868 | 396 | Promoter (1-2kb)    | ENSG00000179818 | 1038  |
| chr2 | 70190947 | 70191306 | 360 | Promoter (<=1kb)    | ENSG00000179818 | 600   |
| chr2 | 70193014 | 70193409 | 396 | Promoter (1-2kb)    | ENSG00000179818 | -1108 |
| chr2 | 70241164 | 70241559 | 396 | Promoter (1-2kb)    | ENSG00000179818 | -1816 |
| chr2 | 70279877 | 70280272 | 396 | Promoter (<=1kb)    | ENSG00000179818 | 645   |
| chr2 | 70280475 | 70280870 | 396 | Promoter (<=1kb)    | ENSG00000179818 | 47    |
| chr2 | 70293433 | 70293828 | 396 | Promoter (2-3kb)    | ENSG00000179818 | -2314 |
| chr2 | 70293451 | 70293810 | 360 | Promoter (2-3kb)    | ENSG00000179818 | -2332 |
| chr2 | 70294618 | 70295013 | 396 | Promoter (1-2kb)    | ENSG00000179818 | 1276  |
| chr2 | 70294855 | 70295250 | 396 | Promoter (1-2kb)    | ENSG00000179818 | 1039  |
| chr2 | 70301538 | 70301933 | 396 | Intron (ENST000004) | ENSG00000179818 | -3604 |
| chr2 | 70301578 | 70301937 | 360 | Intron (ENST000004) | ENSG00000179818 | -3644 |
| chr2 | 70357183 | 70357542 | 360 | Distal Intergenic   | ENSG00000231327 | -4734 |
| chr2 | 70914495 | 70914890 | 396 | Promoter (<=1kb)    | ENSG00000235035 | 221   |
| chr2 | 70915280 | 70915639 | 360 | Promoter (1-2kb)    | ENSG00000235035 | 1006  |
| chr2 | 71111749 | 71112108 | 360 | Promoter (2-3kb)    | ENSG00000237751 | -2893 |
| chr2 | 73680896 | 73681255 | 360 | Promoter (2-3kb)    | ENSG00000230002 | -2636 |
| chr2 | 73982120 | 73982515 | 396 | Distal Intergenic   | ENSG00000273245 | -4207 |
| chr2 | 74206899 | 74207258 | 360 | Promoter (1-2kb)    | ENSG00000237883 | 1230  |
| chr2 | 75059185 | 75059544 | 360 | Promoter (1-2kb)    | ENSG00000272711 | 1570  |
| chr2 | 75144073 | 75144468 | 396 | Promoter (<=1kb)    | ENSG00000204792 | -807  |
| chr2 | 75151955 | 75152314 | 360 | Promoter (<=1kb)    | ENSG00000236209 | 0     |
| chr2 | 75153283 | 75153678 | 396 | Promoter (1-2kb)    | ENSG00000236209 | -1310 |
| chr2 | 75704563 | 75704922 | 360 | Promoter (2-3kb)    | ENSG00000237293 | 2984  |
| chr2 | 75888988 | 75889347 | 360 | Promoter (1-2kb)    | ENSG00000270696 | 1400  |
| chr2 | 78138028 | 78138387 | 360 | Distal Intergenic   | ENSG00000233605 | -4673 |
| chr2 | 80834750 | 80835145 | 396 | Promoter (1-2kb)    | ENSG00000237031 | -1991 |
| chr2 | 83747695 | 83748054 | 360 | Promoter (1-2kb)    | ENSG00000232548 | -1884 |
| chr2 | 85298485 | 85298844 | 360 | Distal Intergenic   | ENSG00000260840 | -4015 |
| chr2 | 85416519 | 85416914 | 396 | Promoter (2-3kb)    | ENSG00000231134 | 2987  |
| chr2 | 85611286 | 85611645 | 360 | Promoter (2-3kb)    | ENSG00000273196 | 2624  |
| chr2 | 85611554 | 85611913 | 360 | Promoter (2-3kb)    | ENSG00000273196 | 2356  |
| chr2 | 85611797 | 85612192 | 396 | Promoter (2-3kb)    | ENSG00000273196 | 2077  |
| chr2 | 85612015 | 85612410 | 396 | Promoter (1-2kb)    | ENSG00000273196 | 1859  |
| chr2 | 85615901 | 85616260 | 360 | Promoter (1-2kb)    | ENSG00000273196 | -1632 |
| chr2 | 85616023 | 85616418 | 396 | Promoter (1-2kb)    | ENSG00000273196 | -1754 |
| chr2 | 85616122 | 85616481 | 360 | Promoter (1-2kb)    | ENSG00000273196 | -1853 |
| chr2 | 86116220 | 86116579 | 360 | Promoter (<=1kb)    | ENSG00000232504 | 0     |

|      |          |          |     |                      |                 |       |
|------|----------|----------|-----|----------------------|-----------------|-------|
| chr2 | 88750380 | 88750775 | 396 | Promoter (1-2kb)     | ENSG00000214336 | 1278  |
| chr2 | 96204981 | 96205376 | 396 | Promoter (1-2kb)     | ENSG00000273305 | 1264  |
| chr2 | 96205279 | 96205674 | 396 | Promoter (1-2kb)     | ENSG00000273305 | 1562  |
| chr2 | 96329669 | 96330028 | 360 | Promoter (1-2kb)     | ENSG00000235584 | -1804 |
| chr2 | 96815537 | 96815932 | 396 | Promoter (2-3kb)     | ENSG00000228873 | -2786 |
| chr2 | 96815637 | 96815996 | 360 | Promoter (2-3kb)     | ENSG00000228873 | -2886 |
| chr2 | 96816061 | 96816456 | 396 | Distal Intergenic    | ENSG00000228873 | -3310 |
| chr2 | 96869385 | 96869780 | 396 | Distal Intergenic    | ENSG00000204685 | -4374 |
| chr2 | 96870911 | 96871306 | 396 | Promoter (2-3kb)     | ENSG00000204685 | -2848 |
| chr2 | 96984374 | 96984733 | 360 | Promoter (2-3kb)     | ENSG00000230747 | 2736  |
| chr2 | 98097227 | 98097586 | 360 | Promoter (1-2kb)     | ENSG00000230606 | 1375  |
| chr2 | 98284700 | 98285059 | 360 | Promoter (<=1kb)     | ENSG00000228486 | -52   |
| chr2 | 99388063 | 99388422 | 360 | Promoter (<=1kb)     | ENSG00000226791 | 121   |
| chr2 | 99389276 | 99389671 | 396 | Promoter (<=1kb)     | ENSG00000226791 | -733  |
| chr2 | 1.01E+08 | 1.01E+08 | 396 | Distal Intergenic    | ENSG00000232084 | -3875 |
| chr2 | 1.01E+08 | 1.01E+08 | 360 | Distal Intergenic    | ENSG00000232084 | -3845 |
| chr2 | 1.01E+08 | 1.01E+08 | 360 | Promoter (<=1kb)     | ENSG00000232084 | -262  |
| chr2 | 1.01E+08 | 1.01E+08 | 396 | Promoter (<=1kb)     | ENSG00000232084 | -224  |
| chr2 | 1.01E+08 | 1.01E+08 | 360 | Promoter (<=1kb)     | ENSG00000232084 | -62   |
| chr2 | 1.01E+08 | 1.01E+08 | 396 | Promoter (<=1kb)     | ENSG00000232084 | 0     |
| chr2 | 1.01E+08 | 1.01E+08 | 396 | Promoter (<=1kb)     | ENSG00000232084 | 816   |
| chr2 | 1.01E+08 | 1.01E+08 | 396 | Promoter (<=1kb)     | ENSG00000228488 | -240  |
| chr2 | 1.01E+08 | 1.01E+08 | 396 | Promoter (2-3kb)     | ENSG00000228488 | -2907 |
| chr2 | 1.02E+08 | 1.02E+08 | 396 | Promoter (2-3kb)     | ENSG00000230140 | 2805  |
| chr2 | 1.02E+08 | 1.02E+08 | 360 | Distal Intergenic    | ENSG00000223947 | -3987 |
| chr2 | 1.02E+08 | 1.02E+08 | 360 | Distal Intergenic    | ENSG00000223947 | -4204 |
| chr2 | 1.02E+08 | 1.02E+08 | 360 | Distal Intergenic    | ENSG00000272902 | -4192 |
| chr2 | 1.02E+08 | 1.02E+08 | 360 | Distal Intergenic    | ENSG00000272902 | -3971 |
| chr2 | 1.02E+08 | 1.02E+08 | 396 | Distal Intergenic    | ENSG00000272902 | -3919 |
| chr2 | 1.02E+08 | 1.02E+08 | 360 | Promoter (1-2kb)     | ENSG00000272902 | -1218 |
| chr2 | 1.02E+08 | 1.02E+08 | 396 | Promoter (<=1kb)     | ENSG00000272902 | -372  |
| chr2 | 1.02E+08 | 1.02E+08 | 396 | Promoter (2-3kb)     | ENSG00000272902 | 2517  |
| chr2 | 1.03E+08 | 1.03E+08 | 360 | Promoter (1-2kb)     | ENSG00000226925 | 1523  |
| chr2 | 1.03E+08 | 1.03E+08 | 396 | Promoter (<=1kb)     | ENSG00000226925 | 765   |
| chr2 | 1.08E+08 | 1.08E+08 | 360 | Promoter (1-2kb)     | ENSG00000230651 | -1882 |
| chr2 | 1.08E+08 | 1.08E+08 | 275 | Promoter (1-2kb)     | ENSG00000230651 | -1926 |
| chr2 | 1.09E+08 | 1.09E+08 | 360 | Promoter (<=1kb)     | ENSG00000225328 | 631   |
| chr2 | 1.09E+08 | 1.09E+08 | 396 | Promoter (<=1kb)     | ENSG00000225328 | 519   |
| chr2 | 1.11E+08 | 1.11E+08 | 396 | Distal Intergenic    | ENSG00000186148 | -4827 |
| chr2 | 1.11E+08 | 1.11E+08 | 396 | Promoter (2-3kb)     | ENSG00000204588 | 2914  |
| chr2 | 1.11E+08 | 1.11E+08 | 360 | Promoter (2-3kb)     | ENSG00000184115 | 2911  |
| chr2 | 1.11E+08 | 1.11E+08 | 360 | Promoter (2-3kb)     | ENSG00000184115 | 2701  |
| chr2 | 1.11E+08 | 1.11E+08 | 396 | Promoter (<=1kb)     | ENSG00000184115 | -887  |
| chr2 | 1.11E+08 | 1.11E+08 | 360 | Distal Intergenic    | ENSG00000184115 | -3661 |
| chr2 | 1.11E+08 | 1.11E+08 | 396 | Distal Intergenic    | ENSG00000235881 | -3129 |
| chr2 | 1.12E+08 | 1.12E+08 | 396 | Promoter (1-2kb)     | ENSG00000204581 | 1774  |
| chr2 | 1.12E+08 | 1.12E+08 | 396 | Promoter (1-2kb)     | ENSG00000204581 | 1515  |
| chr2 | 1.12E+08 | 1.12E+08 | 360 | Promoter (1-2kb)     | ENSG00000271590 | -1953 |
| chr2 | 1.12E+08 | 1.12E+08 | 396 | Intron (ENST000004:) | ENSG00000172965 | -4052 |
| chr2 | 1.12E+08 | 1.12E+08 | 360 | Promoter (<=1kb)     | ENSG00000172965 | -137  |
| chr2 | 1.12E+08 | 1.12E+08 | 396 | Promoter (1-2kb)     | ENSG00000172965 | -1862 |
| chr2 | 1.12E+08 | 1.12E+08 | 360 | Promoter (1-2kb)     | ENSG00000172965 | -1901 |
| chr2 | 1.12E+08 | 1.12E+08 | 396 | Promoter (2-3kb)     | ENSG00000172965 | -2113 |
| chr2 | 1.12E+08 | 1.12E+08 | 360 | Promoter (2-3kb)     | ENSG00000172965 | -2617 |
| chr2 | 1.13E+08 | 1.13E+08 | 396 | Promoter (1-2kb)     | ENSG00000248341 | -1791 |
| chr2 | 1.13E+08 | 1.13E+08 | 396 | Promoter (1-2kb)     | ENSG00000248341 | -1040 |
| chr2 | 1.13E+08 | 1.13E+08 | 396 | Promoter (<=1kb)     | ENSG00000237753 | -561  |
| chr2 | 1.14E+08 | 1.14E+08 | 396 | Promoter (1-2kb)     | ENSG00000234174 | 1997  |

|      |          |          |     |                   |                 |       |
|------|----------|----------|-----|-------------------|-----------------|-------|
| chr2 | 1.14E+08 | 1.14E+08 | 396 | Promoter (1-2kb)  | ENSG00000234174 | 1794  |
| chr2 | 1.14E+08 | 1.14E+08 | 396 | Promoter (<=1kb)  | ENSG00000234174 | -535  |
| chr2 | 1.14E+08 | 1.14E+08 | 360 | Distal Intergenic | ENSG00000189223 | -3428 |
| chr2 | 1.14E+08 | 1.14E+08 | 396 | Promoter (2-3kb)  | ENSG00000189223 | -2503 |
| chr2 | 1.14E+08 | 1.14E+08 | 360 | Promoter (2-3kb)  | ENSG00000189223 | -2371 |
| chr2 | 1.14E+08 | 1.14E+08 | 360 | Promoter (<=1kb)  | ENSG00000189223 | -255  |
| chr2 | 1.14E+08 | 1.14E+08 | 360 | Promoter (<=1kb)  | ENSG00000189223 | -20   |
| chr2 | 1.14E+08 | 1.14E+08 | 360 | Promoter (<=1kb)  | ENSG00000189223 | 449   |
| chr2 | 1.14E+08 | 1.14E+08 | 360 | Promoter (2-3kb)  | ENSG00000189223 | -2236 |
| chr2 | 1.14E+08 | 1.14E+08 | 360 | Promoter (1-2kb)  | ENSG00000189223 | 1090  |
| chr2 | 1.14E+08 | 1.14E+08 | 360 | Promoter (2-3kb)  | ENSG00000258395 | 2533  |
| chr2 | 1.14E+08 | 1.14E+08 | 360 | Promoter (1-2kb)  | ENSG00000189223 | -1428 |
| chr2 | 1.14E+08 | 1.14E+08 | 396 | Promoter (1-2kb)  | ENSG00000189223 | -1390 |
| chr2 | 1.14E+08 | 1.14E+08 | 360 | Promoter (1-2kb)  | ENSG00000272563 | -1685 |
| chr2 | 1.2E+08  | 1.2E+08  | 360 | Promoter (2-3kb)  | ENSG00000229867 | 2970  |
| chr2 | 1.2E+08  | 1.2E+08  | 360 | Promoter (<=1kb)  | ENSG00000229867 | 0     |
| chr2 | 1.2E+08  | 1.2E+08  | 360 | Promoter (2-3kb)  | ENSG00000231013 | -2292 |
| chr2 | 1.2E+08  | 1.2E+08  | 360 | Promoter (<=1kb)  | ENSG00000231013 | 623   |
| chr2 | 1.22E+08 | 1.22E+08 | 396 | Distal Intergenic | ENSG00000271709 | -4700 |
| chr2 | 1.22E+08 | 1.22E+08 | 396 | Distal Intergenic | ENSG00000234455 | -3442 |
| chr2 | 1.25E+08 | 1.25E+08 | 396 | Promoter (1-2kb)  | ENSG00000228400 | 1474  |
| chr2 | 1.27E+08 | 1.27E+08 | 396 | Promoter (<=1kb)  | ENSG00000235774 | -856  |
| chr2 | 1.28E+08 | 1.28E+08 | 396 | Promoter (<=1kb)  | ENSG00000260634 | 0     |
| chr2 | 1.28E+08 | 1.28E+08 | 396 | Promoter (<=1kb)  | ENSG00000260634 | -225  |
| chr2 | 1.28E+08 | 1.28E+08 | 360 | Promoter (1-2kb)  | ENSG00000260634 | -1980 |
| chr2 | 1.28E+08 | 1.28E+08 | 360 | Promoter (2-3kb)  | ENSG00000260634 | -2180 |
| chr2 | 1.28E+08 | 1.28E+08 | 396 | Promoter (2-3kb)  | ENSG00000260634 | -2382 |
| chr2 | 1.28E+08 | 1.28E+08 | 360 | Distal Intergenic | ENSG00000272789 | -3204 |
| chr2 | 1.31E+08 | 1.31E+08 | 360 | Promoter (<=1kb)  | ENSG00000232408 | 972   |
| chr2 | 1.37E+08 | 1.37E+08 | 360 | Promoter (<=1kb)  | ENSG00000231890 | -274  |
| chr2 | 1.39E+08 | 1.39E+08 | 396 | Promoter (2-3kb)  | ENSG00000224231 | -2385 |
| chr2 | 1.39E+08 | 1.39E+08 | 396 | Promoter (1-2kb)  | ENSG00000228043 | -1021 |
| chr2 | 1.43E+08 | 1.43E+08 | 360 | Promoter (1-2kb)  | ENSG00000244125 | 1621  |
| chr2 | 1.44E+08 | 1.44E+08 | 396 | Promoter (1-2kb)  | ENSG00000258268 | -1801 |
| chr2 | 1.44E+08 | 1.44E+08 | 396 | Distal Intergenic | ENSG00000258268 | -3519 |
| chr2 | 1.44E+08 | 1.44E+08 | 360 | Promoter (1-2kb)  | ENSG00000257277 | -1293 |
| chr2 | 1.45E+08 | 1.45E+08 | 360 | Promoter (2-3kb)  | ENSG00000257226 | 2707  |
| chr2 | 1.45E+08 | 1.45E+08 | 396 | Distal Intergenic | ENSG00000232377 | -3060 |
| chr2 | 1.45E+08 | 1.45E+08 | 396 | Promoter (<=1kb)  | ENSG00000232377 | -803  |
| chr2 | 1.45E+08 | 1.45E+08 | 360 | Distal Intergenic | ENSG00000226674 | -3100 |
| chr2 | 1.46E+08 | 1.46E+08 | 360 | Promoter (1-2kb)  | ENSG00000226674 | -1205 |
| chr2 | 1.49E+08 | 1.49E+08 | 396 | Promoter (1-2kb)  | ENSG00000223911 | 1263  |
| chr2 | 1.51E+08 | 1.51E+08 | 360 | Promoter (1-2kb)  | ENSG00000224048 | -1444 |
| chr2 | 1.51E+08 | 1.51E+08 | 396 | Promoter (2-3kb)  | ENSG00000224048 | 2841  |
| chr2 | 1.52E+08 | 1.52E+08 | 396 | Promoter (<=1kb)  | ENSG00000236885 | 0     |
| chr2 | 1.52E+08 | 1.52E+08 | 360 | Promoter (2-3kb)  | ENSG00000236885 | -2126 |
| chr2 | 1.54E+08 | 1.54E+08 | 396 | Promoter (2-3kb)  | ENSG00000224612 | 2415  |
| chr2 | 1.54E+08 | 1.54E+08 | 360 | Promoter (2-3kb)  | ENSG00000227400 | 2030  |
| chr2 | 1.54E+08 | 1.54E+08 | 396 | Promoter (<=1kb)  | ENSG00000227400 | 0     |
| chr2 | 1.54E+08 | 1.54E+08 | 396 | Distal Intergenic | ENSG00000227400 | -3072 |
| chr2 | 1.54E+08 | 1.54E+08 | 360 | Distal Intergenic | ENSG00000227400 | -3263 |
| chr2 | 1.59E+08 | 1.59E+08 | 396 | Promoter (2-3kb)  | ENSG00000270557 | -2961 |
| chr2 | 1.59E+08 | 1.59E+08 | 360 | Promoter (1-2kb)  | ENSG00000270557 | 1629  |
| chr2 | 1.59E+08 | 1.59E+08 | 360 | Promoter (1-2kb)  | ENSG00000237327 | -1395 |
| chr2 | 1.59E+08 | 1.59E+08 | 360 | Promoter (1-2kb)  | ENSG00000237327 | -1192 |
| chr2 | 1.59E+08 | 1.59E+08 | 360 | Promoter (2-3kb)  | ENSG00000237327 | 2992  |
| chr2 | 1.59E+08 | 1.59E+08 | 396 | Promoter (1-2kb)  | ENSG00000227480 | 1846  |
| chr2 | 1.6E+08  | 1.6E+08  | 396 | Promoter (1-2kb)  | ENSG00000228586 | 1151  |

|      |          |          |     |                      |                 |       |
|------|----------|----------|-----|----------------------|-----------------|-------|
| chr2 | 1.6E+08  | 1.6E+08  | 396 | Distal Intergenic    | ENSG00000224152 | -3648 |
| chr2 | 1.62E+08 | 1.62E+08 | 396 | Promoter (1-2kb)     | ENSG00000224467 | -1502 |
| chr2 | 1.62E+08 | 1.62E+08 | 396 | Promoter (<=1kb)     | ENSG00000227403 | 291   |
| chr2 | 1.62E+08 | 1.62E+08 | 396 | Promoter (2-3kb)     | ENSG00000235724 | 2414  |
| chr2 | 1.62E+08 | 1.62E+08 | 360 | Promoter (<=1kb)     | ENSG00000235724 | -323  |
| chr2 | 1.62E+08 | 1.62E+08 | 396 | Promoter (1-2kb)     | ENSG00000235724 | -1420 |
| chr2 | 1.62E+08 | 1.62E+08 | 396 | Promoter (<=1kb)     | ENSG00000235724 | -136  |
| chr2 | 1.62E+08 | 1.62E+08 | 396 | Promoter (<=1kb)     | ENSG00000235724 | -383  |
| chr2 | 1.62E+08 | 1.62E+08 | 360 | Promoter (<=1kb)     | ENSG00000235724 | -407  |
| chr2 | 1.62E+08 | 1.62E+08 | 360 | Promoter (<=1kb)     | ENSG00000235724 | -615  |
| chr2 | 1.62E+08 | 1.62E+08 | 360 | Promoter (1-2kb)     | ENSG00000235724 | -1660 |
| chr2 | 1.67E+08 | 1.67E+08 | 360 | Distal Intergenic    | ENSG00000224490 | -3278 |
| chr2 | 1.68E+08 | 1.68E+08 | 360 | Distal Intergenic    | ENSG00000228222 | -3864 |
| chr2 | 1.69E+08 | 1.69E+08 | 360 | Promoter (<=1kb)     | ENSG00000235335 | -793  |
| chr2 | 1.72E+08 | 1.72E+08 | 396 | Promoter (2-3kb)     | ENSG00000239467 | 2944  |
| chr2 | 1.73E+08 | 1.73E+08 | 396 | Promoter (2-3kb)     | ENSG00000236651 | 2925  |
| chr2 | 1.73E+08 | 1.73E+08 | 360 | Promoter (2-3kb)     | ENSG00000232555 | 2259  |
| chr2 | 1.73E+08 | 1.73E+08 | 396 | Promoter (1-2kb)     | ENSG00000226963 | 1524  |
| chr2 | 1.74E+08 | 1.74E+08 | 396 | Intron (ENST000004:) | ENSG00000238133 | -3722 |
| chr2 | 1.74E+08 | 1.74E+08 | 360 | Promoter (<=1kb)     | ENSG00000238133 | -203  |
| chr2 | 1.74E+08 | 1.74E+08 | 396 | Promoter (<=1kb)     | ENSG00000238133 | -798  |
| chr2 | 1.74E+08 | 1.74E+08 | 396 | Intron (ENST000004:) | ENSG00000238133 | -4515 |
| chr2 | 1.74E+08 | 1.74E+08 | 360 | Promoter (2-3kb)     | ENSG00000238133 | 2230  |
| chr2 | 1.74E+08 | 1.74E+08 | 360 | Distal Intergenic    | ENSG00000238133 | -3281 |
| chr2 | 1.77E+08 | 1.77E+08 | 360 | Distal Intergenic    | ENSG00000229779 | -3038 |
| chr2 | 1.77E+08 | 1.77E+08 | 396 | Promoter (2-3kb)     | ENSG00000229434 | 2437  |
| chr2 | 1.77E+08 | 1.77E+08 | 360 | Promoter (1-2kb)     | ENSG00000236231 | 1607  |
| chr2 | 1.77E+08 | 1.77E+08 | 360 | Promoter (1-2kb)     | ENSG00000236231 | 1405  |
| chr2 | 1.77E+08 | 1.77E+08 | 396 | Promoter (<=1kb)     | ENSG00000236231 | -298  |
| chr2 | 1.77E+08 | 1.77E+08 | 360 | Promoter (1-2kb)     | ENSG00000236231 | -1419 |
| chr2 | 1.77E+08 | 1.77E+08 | 396 | Promoter (1-2kb)     | ENSG00000236231 | -1442 |
| chr2 | 1.78E+08 | 1.78E+08 | 360 | Promoter (<=1kb)     | ENSG00000224577 | 0     |
| chr2 | 1.78E+08 | 1.78E+08 | 360 | Promoter (1-2kb)     | ENSG00000237655 | 1445  |
| chr2 | 1.79E+08 | 1.79E+08 | 396 | Distal Intergenic    | ENSG00000229941 | -3686 |
| chr2 | 1.79E+08 | 1.79E+08 | 360 | Distal Intergenic    | ENSG00000260931 | -4294 |
| chr2 | 1.79E+08 | 1.79E+08 | 396 | Distal Intergenic    | ENSG00000260931 | -4199 |
| chr2 | 1.79E+08 | 1.79E+08 | 396 | Distal Intergenic    | ENSG00000260931 | -3976 |
| chr2 | 1.79E+08 | 1.79E+08 | 396 | Promoter (1-2kb)     | ENSG00000260931 | -1599 |
| chr2 | 1.79E+08 | 1.79E+08 | 396 | Promoter (1-2kb)     | ENSG00000260931 | -1374 |
| chr2 | 1.79E+08 | 1.79E+08 | 360 | Promoter (<=1kb)     | ENSG00000260931 | -149  |
| chr2 | 1.79E+08 | 1.79E+08 | 396 | Promoter (<=1kb)     | ENSG00000260931 | 2     |
| chr2 | 1.79E+08 | 1.79E+08 | 360 | Promoter (2-3kb)     | ENSG00000260931 | 2772  |
| chr2 | 1.79E+08 | 1.79E+08 | 396 | Promoter (1-2kb)     | ENSG00000223960 | -1374 |
| chr2 | 1.79E+08 | 1.79E+08 | 396 | Promoter (<=1kb)     | ENSG00000223960 | 316   |
| chr2 | 1.79E+08 | 1.79E+08 | 360 | Promoter (<=1kb)     | ENSG00000223960 | 408   |
| chr2 | 1.79E+08 | 1.79E+08 | 360 | Promoter (2-3kb)     | ENSG00000237298 | -2974 |
| chr2 | 1.79E+08 | 1.79E+08 | 396 | Promoter (2-3kb)     | ENSG00000237298 | -2394 |
| chr2 | 1.79E+08 | 1.79E+08 | 396 | Promoter (2-3kb)     | ENSG00000237298 | -2181 |
| chr2 | 1.79E+08 | 1.79E+08 | 360 | Promoter (2-3kb)     | ENSG00000270277 | -2381 |
| chr2 | 1.79E+08 | 1.79E+08 | 360 | Intron (ENST000005:) | ENSG00000271141 | -3766 |
| chr2 | 1.79E+08 | 1.79E+08 | 396 | Promoter (1-2kb)     | ENSG00000271141 | -1588 |
| chr2 | 1.79E+08 | 1.79E+08 | 360 | Exon (ENST0000058:)  | ENSG00000237298 | -4150 |
| chr2 | 1.82E+08 | 1.82E+08 | 396 | Promoter (<=1kb)     | ENSG00000238171 | 832   |
| chr2 | 1.84E+08 | 1.84E+08 | 396 | Promoter (2-3kb)     | ENSG00000224643 | -2144 |
| chr2 | 1.9E+08  | 1.9E+08  | 360 | Distal Intergenic    | ENSG00000228073 | -4338 |
| chr2 | 1.91E+08 | 1.91E+08 | 396 | Promoter (1-2kb)     | ENSG00000253559 | -1248 |
| chr2 | 1.92E+08 | 1.92E+08 | 360 | Promoter (<=1kb)     | ENSG00000228509 | 0     |
| chr2 | 1.92E+08 | 1.92E+08 | 396 | Promoter (<=1kb)     | ENSG00000228509 | 0     |

|      |          |          |     |                    |                 |       |
|------|----------|----------|-----|--------------------|-----------------|-------|
| chr2 | 1.92E+08 | 1.92E+08 | 396 | Promoter (<=1kb)   | ENSG00000228509 | -6    |
| chr2 | 1.92E+08 | 1.92E+08 | 360 | Promoter (<=1kb)   | ENSG00000228509 | -10   |
| chr2 | 1.92E+08 | 1.92E+08 | 360 | Promoter (<=1kb)   | ENSG00000228509 | -275  |
| chr2 | 1.92E+08 | 1.92E+08 | 360 | Promoter (<=1kb)   | ENSG00000230686 | 855   |
| chr2 | 1.96E+08 | 1.96E+08 | 396 | Distal Intergenic  | ENSG00000230173 | -3952 |
| chr2 | 1.96E+08 | 1.96E+08 | 396 | Distal Intergenic  | ENSG00000230173 | -3751 |
| chr2 | 1.97E+08 | 1.97E+08 | 360 | Promoter (2-3kb)   | ENSG00000229056 | -2825 |
| chr2 | 2E+08    | 2E+08    | 360 | Distal Intergenic  | ENSG00000231557 | -3752 |
| chr2 | 2E+08    | 2E+08    | 360 | Distal Intergenic  | ENSG00000257045 | -4084 |
| chr2 | 2E+08    | 2E+08    | 396 | Promoter (2-3kb)   | ENSG00000225953 | -2493 |
| chr2 | 2E+08    | 2E+08    | 396 | Promoter (2-3kb)   | ENSG00000225953 | -2271 |
| chr2 | 2E+08    | 2E+08    | 396 | Promoter (<=1kb)   | ENSG00000225953 | -135  |
| chr2 | 2E+08    | 2E+08    | 360 | Promoter (<=1kb)   | ENSG00000225953 | 64    |
| chr2 | 2E+08    | 2E+08    | 396 | Promoter (<=1kb)   | ENSG00000225953 | 341   |
| chr2 | 2E+08    | 2E+08    | 360 | Promoter (<=1kb)   | ENSG00000225953 | 526   |
| chr2 | 2E+08    | 2E+08    | 360 | Distal Intergenic  | ENSG00000238217 | -4950 |
| chr2 | 2E+08    | 2E+08    | 396 | Promoter (<=1kb)   | ENSG00000238217 | 147   |
| chr2 | 2E+08    | 2E+08    | 360 | Promoter (<=1kb)   | ENSG00000238217 | 752   |
| chr2 | 2.02E+08 | 2.02E+08 | 396 | Distal Intergenic  | ENSG00000230408 | -3760 |
| chr2 | 2.02E+08 | 2.02E+08 | 360 | Promoter (2-3kb)   | ENSG00000234431 | -2126 |
| chr2 | 2.02E+08 | 2.02E+08 | 360 | Promoter (1-2kb)   | ENSG00000234431 | 1187  |
| chr2 | 2.02E+08 | 2.02E+08 | 360 | Promoter (1-2kb)   | ENSG00000234431 | 1415  |
| chr2 | 2.03E+08 | 2.03E+08 | 396 | Promoter (1-2kb)   | ENSG00000273456 | 1263  |
| chr2 | 2.03E+08 | 2.03E+08 | 360 | Promoter (1-2kb)   | ENSG00000273456 | 1269  |
| chr2 | 2.03E+08 | 2.03E+08 | 396 | Promoter (<=1kb)   | ENSG00000273456 | 725   |
| chr2 | 2.03E+08 | 2.03E+08 | 360 | Promoter (<=1kb)   | ENSG00000273456 | 721   |
| chr2 | 2.05E+08 | 2.05E+08 | 396 | Promoter (1-2kb)   | ENSG00000236634 | 1186  |
| chr2 | 2.07E+08 | 2.07E+08 | 396 | Promoter (<=1kb)   | ENSG00000228577 | -245  |
| chr2 | 2.07E+08 | 2.07E+08 | 396 | Promoter (<=1kb)   | ENSG00000228577 | -446  |
| chr2 | 2.07E+08 | 2.08E+08 | 396 | Distal Intergenic  | ENSG00000231653 | -4459 |
| chr2 | 2.08E+08 | 2.08E+08 | 360 | Promoter (1-2kb)   | ENSG00000237892 | -1323 |
| chr2 | 2.08E+08 | 2.08E+08 | 396 | Distal Intergenic  | ENSG00000224342 | -4071 |
| chr2 | 2.08E+08 | 2.08E+08 | 360 | Distal Intergenic  | ENSG00000224342 | -3512 |
| chr2 | 2.08E+08 | 2.08E+08 | 396 | Distal Intergenic  | ENSG00000224342 | -3269 |
| chr2 | 2.08E+08 | 2.08E+08 | 360 | Promoter (<=1kb)   | ENSG00000240440 | 0     |
| chr2 | 2.08E+08 | 2.08E+08 | 396 | Promoter (1-2kb)   | ENSG00000223725 | 1937  |
| chr2 | 2.08E+08 | 2.08E+08 | 396 | Promoter (1-2kb)   | ENSG00000223725 | 1124  |
| chr2 | 2.09E+08 | 2.09E+08 | 396 | Promoter (<=1kb)   | ENSG00000225111 | 727   |
| chr2 | 2.09E+08 | 2.09E+08 | 360 | Distal Intergenic  | ENSG00000225111 | -4362 |
| chr2 | 2.09E+08 | 2.09E+08 | 360 | Promoter (<=1kb)   | ENSG00000231896 | 0     |
| chr2 | 2.15E+08 | 2.15E+08 | 396 | Intron (ENST000004 | ENSG00000224257 | -4095 |
| chr2 | 2.15E+08 | 2.15E+08 | 360 | Promoter (2-3kb)   | ENSG00000224257 | -2726 |
| chr2 | 2.15E+08 | 2.15E+08 | 396 | Promoter (2-3kb)   | ENSG00000224257 | -2476 |
| chr2 | 2.15E+08 | 2.15E+08 | 396 | Promoter (1-2kb)   | ENSG00000224257 | -1168 |
| chr2 | 2.15E+08 | 2.15E+08 | 360 | Promoter (<=1kb)   | ENSG00000224257 | -497  |
| chr2 | 2.15E+08 | 2.15E+08 | 396 | Promoter (<=1kb)   | ENSG00000224257 | 0     |
| chr2 | 2.15E+08 | 2.15E+08 | 396 | Promoter (<=1kb)   | ENSG00000224257 | 0     |
| chr2 | 2.15E+08 | 2.15E+08 | 396 | Promoter (2-3kb)   | ENSG00000224257 | 2102  |
| chr2 | 2.16E+08 | 2.16E+08 | 396 | Distal Intergenic  | ENSG00000197585 | -3884 |
| chr2 | 2.16E+08 | 2.16E+08 | 396 | Promoter (<=1kb)   | ENSG00000229267 | 999   |
| chr2 | 2.16E+08 | 2.16E+08 | 360 | Promoter (1-2kb)   | ENSG00000229267 | 1157  |
| chr2 | 2.16E+08 | 2.16E+08 | 396 | Promoter (1-2kb)   | ENSG00000229267 | 1212  |
| chr2 | 2.16E+08 | 2.16E+08 | 396 | Promoter (1-2kb)   | ENSG00000229267 | 1948  |
| chr2 | 2.16E+08 | 2.16E+08 | 396 | Promoter (2-3kb)   | ENSG00000229267 | 2795  |
| chr2 | 2.16E+08 | 2.16E+08 | 360 | Promoter (2-3kb)   | ENSG00000229267 | 2836  |
| chr2 | 2.16E+08 | 2.16E+08 | 360 | Distal Intergenic  | ENSG00000230695 | -3028 |
| chr2 | 2.16E+08 | 2.16E+08 | 396 | Promoter (1-2kb)   | ENSG00000237525 | 1415  |
| chr2 | 2.17E+08 | 2.17E+08 | 360 | Promoter (2-3kb)   | ENSG00000237525 | -2247 |

|      |          |          |     |                     |                 |       |
|------|----------|----------|-----|---------------------|-----------------|-------|
| chr2 | 2.17E+08 | 2.17E+08 | 360 | Promoter (1-2kb)    | ENSG00000230838 | 1128  |
| chr2 | 2.17E+08 | 2.17E+08 | 396 | Promoter (<=1kb)    | ENSG00000235770 | -204  |
| chr2 | 2.17E+08 | 2.17E+08 | 396 | Distal Intergenic   | ENSG00000260804 | -3928 |
| chr2 | 2.17E+08 | 2.17E+08 | 360 | Promoter (2-3kb)    | ENSG00000241520 | 2686  |
| chr2 | 2.17E+08 | 2.17E+08 | 360 | Promoter (2-3kb)    | ENSG00000241520 | 2478  |
| chr2 | 2.18E+08 | 2.18E+08 | 396 | Intron (ENST000004) | ENSG00000259855 | -4971 |
| chr2 | 2.19E+08 | 2.19E+08 | 360 | Promoter (2-3kb)    | ENSG00000261338 | -2950 |
| chr2 | 2.19E+08 | 2.19E+08 | 396 | Promoter (2-3kb)    | ENSG00000261338 | -2910 |
| chr2 | 2.19E+08 | 2.19E+08 | 396 | Promoter (<=1kb)    | ENSG00000261338 | 69    |
| chr2 | 2.19E+08 | 2.19E+08 | 360 | Promoter (2-3kb)    | ENSG00000261338 | 2076  |
| chr2 | 2.19E+08 | 2.19E+08 | 396 | Promoter (1-2kb)    | ENSG00000237281 | -1630 |
| chr2 | 2.19E+08 | 2.19E+08 | 360 | Promoter (2-3kb)    | ENSG00000225062 | 2021  |
| chr2 | 2.19E+08 | 2.19E+08 | 396 | Promoter (1-2kb)    | ENSG00000225062 | 1559  |
| chr2 | 2.19E+08 | 2.19E+08 | 360 | Promoter (1-2kb)    | ENSG00000225062 | 1512  |
| chr2 | 2.19E+08 | 2.19E+08 | 396 | Promoter (1-2kb)    | ENSG00000225062 | 1351  |
| chr2 | 2.19E+08 | 2.19E+08 | 360 | Promoter (1-2kb)    | ENSG00000225062 | -1359 |
| chr2 | 2.19E+08 | 2.19E+08 | 396 | Promoter (<=1kb)    | ENSG00000273466 | 76    |
| chr2 | 2.19E+08 | 2.19E+08 | 396 | Promoter (<=1kb)    | ENSG00000273466 | 0     |
| chr2 | 2.19E+08 | 2.19E+08 | 396 | Promoter (<=1kb)    | ENSG00000273466 | -646  |
| chr2 | 2.2E+08  | 2.2E+08  | 360 | Distal Intergenic   | ENSG00000224090 | -3050 |
| chr2 | 2.2E+08  | 2.2E+08  | 360 | Promoter (<=1kb)    | ENSG00000229525 | -397  |
| chr2 | 2.22E+08 | 2.22E+08 | 396 | Promoter (2-3kb)    | ENSG00000224819 | 2138  |
| chr2 | 2.24E+08 | 2.24E+08 | 396 | Promoter (<=1kb)    | ENSG00000235610 | -909  |
| chr2 | 2.24E+08 | 2.24E+08 | 360 | Promoter (<=1kb)    | ENSG00000235610 | -929  |
| chr2 | 2.24E+08 | 2.24E+08 | 360 | Promoter (<=1kb)    | ENSG00000235610 | -656  |
| chr2 | 2.26E+08 | 2.26E+08 | 396 | Distal Intergenic   | ENSG00000232784 | -4182 |
| chr2 | 2.27E+08 | 2.27E+08 | 396 | Promoter (2-3kb)    | ENSG00000273301 | -2065 |
| chr2 | 2.27E+08 | 2.27E+08 | 396 | Promoter (2-3kb)    | ENSG00000235070 | -2704 |
| chr2 | 2.31E+08 | 2.31E+08 | 360 | Intron (ENST000004) | ENSG00000225963 | -4257 |
| chr2 | 2.31E+08 | 2.31E+08 | 396 | Intron (ENST000004) | ENSG00000225963 | -3951 |
| chr2 | 2.31E+08 | 2.31E+08 | 396 | Promoter (2-3kb)    | ENSG00000225963 | -2080 |
| chr2 | 2.31E+08 | 2.31E+08 | 396 | Promoter (<=1kb)    | ENSG00000225963 | 496   |
| chr2 | 2.32E+08 | 2.32E+08 | 396 | Promoter (2-3kb)    | ENSG00000238062 | 2228  |
| chr2 | 2.33E+08 | 2.33E+08 | 360 | Promoter (<=1kb)    | ENSG00000227033 | 0     |
| chr2 | 2.33E+08 | 2.33E+08 | 360 | Distal Intergenic   | ENSG00000224516 | -4877 |
| chr2 | 2.33E+08 | 2.33E+08 | 396 | Promoter (2-3kb)    | ENSG00000237087 | -2113 |
| chr2 | 2.33E+08 | 2.33E+08 | 396 | Promoter (<=1kb)    | ENSG00000237126 | 0     |
| chr2 | 2.33E+08 | 2.33E+08 | 360 | Promoter (<=1kb)    | ENSG00000237126 | 0     |
| chr2 | 2.33E+08 | 2.33E+08 | 360 | Promoter (<=1kb)    | ENSG00000237126 | -61   |
| chr2 | 2.35E+08 | 2.35E+08 | 396 | Promoter (2-3kb)    | ENSG00000224814 | 2252  |
| chr2 | 2.35E+08 | 2.35E+08 | 360 | Promoter (1-2kb)    | ENSG00000237581 | 1175  |
| chr2 | 2.35E+08 | 2.35E+08 | 396 | Promoter (<=1kb)    | ENSG00000237581 | 270   |
| chr2 | 2.35E+08 | 2.35E+08 | 396 | Promoter (<=1kb)    | ENSG00000237581 | 0     |
| chr2 | 2.35E+08 | 2.35E+08 | 360 | Distal Intergenic   | ENSG00000237581 | -3750 |
| chr2 | 2.35E+08 | 2.35E+08 | 360 | Distal Intergenic   | ENSG00000237581 | -3973 |
| chr2 | 2.35E+08 | 2.35E+08 | 360 | Promoter (2-3kb)    | ENSG00000226442 | 2464  |
| chr2 | 2.37E+08 | 2.37E+08 | 360 | Promoter (<=1kb)    | ENSG00000233611 | 0     |
| chr2 | 2.37E+08 | 2.37E+08 | 360 | Promoter (<=1kb)    | ENSG00000233611 | 94    |
| chr2 | 2.38E+08 | 2.38E+08 | 360 | Intron (ENST000004) | ENSG00000232328 | -3273 |
| chr2 | 2.38E+08 | 2.38E+08 | 396 | Promoter (<=1kb)    | ENSG00000232328 | 773   |
| chr2 | 2.38E+08 | 2.38E+08 | 396 | Promoter (<=1kb)    | ENSG00000232328 | 990   |
| chr2 | 2.38E+08 | 2.38E+08 | 360 | Promoter (1-2kb)    | ENSG00000124835 | -1789 |
| chr2 | 2.38E+08 | 2.38E+08 | 396 | Promoter (1-2kb)    | ENSG00000124835 | -1910 |
| chr2 | 2.38E+08 | 2.38E+08 | 360 | Promoter (2-3kb)    | ENSG00000124835 | -2747 |
| chr2 | 2.38E+08 | 2.38E+08 | 360 | Promoter (<=1kb)    | ENSG00000227252 | 755   |
| chr2 | 2.38E+08 | 2.38E+08 | 360 | Promoter (<=1kb)    | ENSG00000227252 | -830  |
| chr2 | 2.39E+08 | 2.39E+08 | 396 | Distal Intergenic   | ENSG00000227107 | -3226 |
| chr2 | 2.39E+08 | 2.39E+08 | 396 | Promoter (1-2kb)    | ENSG00000227107 | 1607  |

|      |          |          |     |                   |                 |       |
|------|----------|----------|-----|-------------------|-----------------|-------|
| chr2 | 2.39E+08 | 2.39E+08 | 360 | Promoter (1-2kb)  | ENSG00000227107 | 1683  |
| chr2 | 2.39E+08 | 2.39E+08 | 360 | Promoter (1-2kb)  | ENSG00000227107 | 1886  |
| chr2 | 2.39E+08 | 2.39E+08 | 360 | Promoter (1-2kb)  | ENSG00000225057 | 1062  |
| chr2 | 2.4E+08  | 2.4E+08  | 360 | Distal Intergenic | ENSG00000260506 | -4613 |
| chr2 | 2.42E+08 | 2.42E+08 | 396 | Promoter (<=1kb)  | ENSG00000260942 | 646   |
| chr2 | 2.42E+08 | 2.42E+08 | 360 | Promoter (1-2kb)  | ENSG00000260942 | -1979 |
| chr2 | 2.42E+08 | 2.42E+08 | 396 | Promoter (1-2kb)  | ENSG00000260942 | -1995 |
| chr2 | 2.42E+08 | 2.42E+08 | 360 | Promoter (<=1kb)  | ENSG00000219159 | 466   |
| chr2 | 2.42E+08 | 2.42E+08 | 396 | Promoter (<=1kb)  | ENSG00000233392 | -128  |
| chr3 | 96217    | 96576    | 360 | Promoter (<=1kb)  | ENSG00000224918 | -188  |
| chr3 | 96417    | 96776    | 360 | Promoter (<=1kb)  | ENSG00000224918 | -388  |
| chr3 | 3196545  | 3196940  | 396 | Promoter (1-2kb)  | ENSG00000271870 | 1919  |
| chr3 | 4797450  | 4797809  | 360 | Distal Intergenic | ENSG00000235947 | -4176 |
| chr3 | 4950169  | 4950528  | 360 | Promoter (1-2kb)  | ENSG00000235831 | -1983 |
| chr3 | 5026590  | 5026985  | 396 | Distal Intergenic | ENSG00000235831 | -4944 |
| chr3 | 8636421  | 8636816  | 396 | Promoter (1-2kb)  | ENSG00000224884 | -1611 |
| chr3 | 8651782  | 8652141  | 360 | Promoter (1-2kb)  | ENSG00000227110 | 1445  |
| chr3 | 8651992  | 8652351  | 360 | Promoter (1-2kb)  | ENSG00000227110 | 1235  |
| chr3 | 8653665  | 8654060  | 396 | Promoter (<=1kb)  | ENSG00000227110 | -55   |
| chr3 | 8657994  | 8658353  | 360 | Distal Intergenic | ENSG00000227110 | -4384 |
| chr3 | 9402727  | 9403122  | 396 | Promoter (1-2kb)  | ENSG00000254485 | 1503  |
| chr3 | 9435066  | 9435425  | 360 | Promoter (1-2kb)  | ENSG00000206573 | -1560 |
| chr3 | 9538211  | 9538570  | 360 | Promoter (2-3kb)  | ENSG00000269975 | 2683  |
| chr3 | 9986712  | 9987071  | 360 | Promoter (2-3kb)  | ENSG00000230082 | -2017 |
| chr3 | 9986756  | 9987151  | 396 | Promoter (1-2kb)  | ENSG00000230082 | -1937 |
| chr3 | 10320900 | 10321295 | 396 | Distal Intergenic | ENSG00000231177 | -4808 |
| chr3 | 10320934 | 10321293 | 360 | Distal Intergenic | ENSG00000231177 | -4810 |
| chr3 | 10812091 | 10812450 | 360 | Promoter (2-3kb)  | ENSG00000230599 | 2942  |
| chr3 | 10812131 | 10812526 | 396 | Promoter (2-3kb)  | ENSG00000230599 | 2982  |
| chr3 | 11059157 | 11059516 | 360 | Promoter (1-2kb)  | ENSG00000232287 | 1394  |
| chr3 | 11643675 | 11644034 | 360 | Distal Intergenic | ENSG00000271716 | -4624 |
| chr3 | 11653777 | 11654172 | 396 | Promoter (<=1kb)  | ENSG00000272483 | 701   |
| chr3 | 11655209 | 11655568 | 360 | Promoter (2-3kb)  | ENSG00000272483 | 2133  |
| chr3 | 11655408 | 11655767 | 360 | Promoter (2-3kb)  | ENSG00000272483 | 2332  |
| chr3 | 12192288 | 12192683 | 396 | Promoter (2-3kb)  | ENSG00000157152 | 2231  |
| chr3 | 12876929 | 12877288 | 360 | Promoter (2-3kb)  | ENSG00000272263 | -2702 |
| chr3 | 12877133 | 12877492 | 360 | Promoter (2-3kb)  | ENSG00000272263 | -2906 |
| chr3 | 12928764 | 12929123 | 360 | Promoter (2-3kb)  | ENSG00000232746 | -2054 |
| chr3 | 12929148 | 12929543 | 396 | Promoter (2-3kb)  | ENSG00000232746 | -2438 |
| chr3 | 14857507 | 14857866 | 360 | Distal Intergenic | ENSG00000260902 | -4586 |
| chr3 | 27678658 | 27679053 | 396 | Promoter (<=1kb)  | ENSG00000271943 | -753  |
| chr3 | 27680613 | 27681008 | 396 | Promoter (<=1kb)  | ENSG00000271943 | 807   |
| chr3 | 27680849 | 27681244 | 396 | Promoter (1-2kb)  | ENSG00000271943 | 1043  |
| chr3 | 27681080 | 27681475 | 396 | Promoter (1-2kb)  | ENSG00000271943 | 1274  |
| chr3 | 30562592 | 30562951 | 360 | Distal Intergenic | ENSG00000227260 | -3286 |
| chr3 | 30569166 | 30569561 | 396 | Promoter (1-2kb)  | ENSG00000227549 | -1461 |
| chr3 | 30739923 | 30740318 | 396 | Promoter (<=1kb)  | ENSG00000261468 | 770   |
| chr3 | 31751694 | 31752053 | 360 | Promoter (<=1kb)  | ENSG00000232490 | -46   |
| chr3 | 32281562 | 32281957 | 396 | Promoter (1-2kb)  | ENSG00000261572 | -1492 |
| chr3 | 32778612 | 32778971 | 360 | Promoter (<=1kb)  | ENSG00000251224 | 0     |
| chr3 | 32781455 | 32781850 | 396 | Promoter (2-3kb)  | ENSG00000251224 | -2509 |
| chr3 | 33187081 | 33187476 | 396 | Promoter (1-2kb)  | ENSG00000272149 | 1737  |
| chr3 | 37225420 | 37225779 | 360 | Promoter (1-2kb)  | ENSG00000271993 | 1822  |
| chr3 | 37860227 | 37860622 | 396 | Promoter (1-2kb)  | ENSG00000235257 | 1969  |
| chr3 | 37860234 | 37860593 | 360 | Promoter (1-2kb)  | ENSG00000235257 | 1998  |
| chr3 | 37860496 | 37860891 | 396 | Promoter (1-2kb)  | ENSG00000235257 | 1700  |
| chr3 | 37860754 | 37861149 | 396 | Promoter (1-2kb)  | ENSG00000235257 | 1442  |
| chr3 | 37863525 | 37863884 | 360 | Promoter (<=1kb)  | ENSG00000235257 | -624  |



|      |          |          |     |                   |                 |       |
|------|----------|----------|-----|-------------------|-----------------|-------|
| chr3 | 37865511 | 37865906 | 396 | Promoter (2-3kb)  | ENSG00000235257 | -2610 |
| chr3 | 37903390 | 37903785 | 396 | Promoter (<=1kb)  | ENSG00000235257 | -119  |
| chr3 | 37903674 | 37904033 | 360 | Promoter (<=1kb)  | ENSG00000235257 | -403  |
| chr3 | 37905962 | 37906357 | 396 | Promoter (2-3kb)  | ENSG00000235257 | -2691 |
| chr3 | 37907358 | 37907753 | 396 | Distal Intergenic | ENSG00000235257 | -4087 |
| chr3 | 37907852 | 37908247 | 396 | Distal Intergenic | ENSG00000235257 | -4581 |
| chr3 | 37908095 | 37908490 | 396 | Distal Intergenic | ENSG00000235257 | -4824 |
| chr3 | 37908140 | 37908499 | 360 | Distal Intergenic | ENSG00000235257 | -4869 |
| chr3 | 38496327 | 38496722 | 396 | Promoter (<=1kb)  | ENSG00000229589 | -16   |
| chr3 | 40497646 | 40498005 | 360 | Promoter (2-3kb)  | ENSG00000223797 | -2826 |
| chr3 | 40505718 | 40506113 | 396 | Promoter (1-2kb)  | ENSG00000272452 | -1844 |
| chr3 | 40505917 | 40506312 | 396 | Promoter (1-2kb)  | ENSG00000272452 | -1645 |
| chr3 | 41207374 | 41207769 | 396 | Promoter (2-3kb)  | ENSG00000233919 | 2269  |
| chr3 | 42570893 | 42571252 | 360 | Promoter (2-3kb)  | ENSG00000232354 | 2302  |
| chr3 | 42742167 | 42742526 | 360 | Promoter (1-2kb)  | ENSG00000230970 | -1619 |
| chr3 | 42742422 | 42742781 | 360 | Promoter (1-2kb)  | ENSG00000230970 | -1364 |
| chr3 | 42744292 | 42744651 | 360 | Promoter (<=1kb)  | ENSG00000230970 | 89    |
| chr3 | 42745624 | 42745983 | 360 | Promoter (1-2kb)  | ENSG00000230970 | 1421  |
| chr3 | 42769299 | 42769658 | 360 | Distal Intergenic | ENSG00000173811 | -4409 |
| chr3 | 42814747 | 42815106 | 360 | Promoter (2-3kb)  | ENSG00000225611 | 2643  |
| chr3 | 42851193 | 42851552 | 360 | Promoter (<=1kb)  | ENSG00000273328 | 229   |
| chr3 | 42851999 | 42852358 | 360 | Promoter (1-2kb)  | ENSG00000273328 | 1035  |
| chr3 | 42852717 | 42853076 | 360 | Promoter (1-2kb)  | ENSG00000273328 | 1753  |
| chr3 | 42853785 | 42854144 | 360 | Promoter (2-3kb)  | ENSG00000273328 | 2821  |
| chr3 | 42979471 | 42979830 | 360 | Promoter (1-2kb)  | ENSG00000206552 | -1194 |
| chr3 | 43127237 | 43127596 | 360 | Promoter (1-2kb)  | ENSG00000227245 | -1375 |
| chr3 | 43397105 | 43397500 | 396 | Distal Intergenic | ENSG00000234617 | -3651 |
| chr3 | 44376795 | 44377190 | 396 | Promoter (2-3kb)  | ENSG00000271937 | 2854  |
| chr3 | 44729497 | 44729892 | 396 | Promoter (2-3kb)  | ENSG00000236869 | -2352 |
| chr3 | 44730382 | 44730741 | 360 | Distal Intergenic | ENSG00000236869 | -3237 |
| chr3 | 44939763 | 44940122 | 360 | Promoter (<=1kb)  | ENSG00000235845 | -548  |
| chr3 | 44939808 | 44940203 | 396 | Promoter (<=1kb)  | ENSG00000235845 | -467  |
| chr3 | 47420055 | 47420414 | 360 | Promoter (2-3kb)  | ENSG00000260236 | 2075  |
| chr3 | 47424682 | 47425041 | 360 | Promoter (2-3kb)  | ENSG00000260236 | -2193 |
| chr3 | 47646557 | 47646952 | 396 | Promoter (<=1kb)  | ENSG00000214773 | -390  |
| chr3 | 48696760 | 48697119 | 360 | Distal Intergenic | ENSG00000228350 | -4090 |
| chr3 | 48702495 | 48702890 | 396 | Promoter (1-2kb)  | ENSG00000228350 | 1286  |
| chr3 | 49018047 | 49018406 | 360 | Promoter (2-3kb)  | ENSG00000235236 | 2893  |
| chr3 | 49018057 | 49018452 | 396 | Promoter (2-3kb)  | ENSG00000235236 | 2847  |
| chr3 | 49018278 | 49018637 | 360 | Promoter (2-3kb)  | ENSG00000235236 | 2662  |
| chr3 | 49018343 | 49018738 | 396 | Promoter (2-3kb)  | ENSG00000235236 | 2561  |
| chr3 | 49019899 | 49020294 | 396 | Promoter (1-2kb)  | ENSG00000235236 | 1005  |
| chr3 | 49020106 | 49020501 | 396 | Promoter (<=1kb)  | ENSG00000235236 | 798   |
| chr3 | 49021733 | 49022128 | 396 | Promoter (<=1kb)  | ENSG00000235236 | -315  |
| chr3 | 49021881 | 49022240 | 360 | Promoter (<=1kb)  | ENSG00000235236 | -463  |
| chr3 | 49021941 | 49022336 | 396 | Promoter (<=1kb)  | ENSG00000235236 | -523  |
| chr3 | 49022721 | 49023116 | 396 | Promoter (<=1kb)  | ENSG00000273211 | 280   |
| chr3 | 49029104 | 49029463 | 360 | Promoter (1-2kb)  | ENSG00000223343 | -1683 |
| chr3 | 49029194 | 49029589 | 396 | Promoter (1-2kb)  | ENSG00000223343 | -1773 |
| chr3 | 49676896 | 49677255 | 360 | Promoter (1-2kb)  | ENSG00000235120 | 1947  |
| chr3 | 50191601 | 50191996 | 396 | Promoter (1-2kb)  | ENSG00000235016 | 1457  |
| chr3 | 50191861 | 50192256 | 396 | Promoter (1-2kb)  | ENSG00000235016 | 1197  |
| chr3 | 50194749 | 50195144 | 396 | Promoter (1-2kb)  | ENSG00000235016 | -1231 |
| chr3 | 50195103 | 50195498 | 396 | Promoter (1-2kb)  | ENSG00000235016 | -1585 |
| chr3 | 50195246 | 50195605 | 360 | Promoter (1-2kb)  | ENSG00000235016 | -1728 |
| chr3 | 50195540 | 50195935 | 396 | Promoter (2-3kb)  | ENSG00000235016 | -2022 |
| chr3 | 50195770 | 50196165 | 396 | Promoter (2-3kb)  | ENSG00000235016 | -2252 |
| chr3 | 50196016 | 50196375 | 360 | Promoter (2-3kb)  | ENSG00000235016 | -2498 |

|      |          |          |     |                     |                 |       |
|------|----------|----------|-----|---------------------|-----------------|-------|
| chr3 | 50196223 | 50196582 | 360 | Promoter (2-3kb)    | ENSG00000235016 | -2705 |
| chr3 | 50197042 | 50197401 | 360 | Distal Intergenic   | ENSG00000235016 | -3524 |
| chr3 | 50298176 | 50298571 | 396 | Promoter (<=1kb)    | ENSG00000230454 | -94   |
| chr3 | 50298786 | 50299181 | 396 | Promoter (<=1kb)    | ENSG00000230454 | 121   |
| chr3 | 50298932 | 50299291 | 360 | Promoter (<=1kb)    | ENSG00000230454 | 267   |
| chr3 | 50298988 | 50299383 | 396 | Promoter (<=1kb)    | ENSG00000230454 | 323   |
| chr3 | 50299152 | 50299511 | 360 | Promoter (<=1kb)    | ENSG00000230454 | 487   |
| chr3 | 50299707 | 50300102 | 396 | Promoter (1-2kb)    | ENSG00000230454 | 1042  |
| chr3 | 50299734 | 50300093 | 360 | Promoter (1-2kb)    | ENSG00000230454 | 1069  |
| chr3 | 50302595 | 50302954 | 360 | Promoter (1-2kb)    | ENSG00000232352 | 1849  |
| chr3 | 50302709 | 50303104 | 396 | Promoter (1-2kb)    | ENSG00000232352 | 1699  |
| chr3 | 50302870 | 50303229 | 360 | Promoter (1-2kb)    | ENSG00000232352 | 1574  |
| chr3 | 50303335 | 50303694 | 360 | Promoter (1-2kb)    | ENSG00000232352 | 1109  |
| chr3 | 50303852 | 50304211 | 360 | Promoter (<=1kb)    | ENSG00000232352 | 592   |
| chr3 | 50309845 | 50310240 | 396 | Promoter (<=1kb)    | ENSG00000012171 | -310  |
| chr3 | 53828761 | 53829156 | 396 | Promoter (2-3kb)    | ENSG00000271916 | 2890  |
| chr3 | 56973885 | 56974280 | 396 | Promoter (<=1kb)    | ENSG00000240198 | 0     |
| chr3 | 57112394 | 57112789 | 396 | Promoter (<=1kb)    | ENSG00000272202 | -182  |
| chr3 | 58149164 | 58149523 | 360 | Promoter (1-2kb)    | ENSG00000244161 | 1518  |
| chr3 | 58157430 | 58157825 | 396 | Promoter (1-2kb)    | ENSG00000244161 | -1067 |
| chr3 | 58415148 | 58415543 | 396 | Promoter (1-2kb)    | ENSG00000272182 | 1166  |
| chr3 | 58475859 | 58476254 | 396 | Promoter (<=1kb)    | ENSG00000272360 | 764   |
| chr3 | 63088434 | 63088793 | 360 | Promoter (2-3kb)    | ENSG00000244342 | -2858 |
| chr3 | 63088679 | 63089038 | 360 | Promoter (2-3kb)    | ENSG00000244342 | -2613 |
| chr3 | 63848693 | 63849088 | 396 | Promoter (2-3kb)    | ENSG00000240549 | 2372  |
| chr3 | 63848935 | 63849330 | 396 | Promoter (2-3kb)    | ENSG00000240549 | 2614  |
| chr3 | 63987108 | 63987467 | 360 | Promoter (2-3kb)    | ENSG00000239653 | -2231 |
| chr3 | 64091972 | 64092367 | 396 | Promoter (2-3kb)    | ENSG00000241101 | 2826  |
| chr3 | 64092051 | 64092410 | 360 | Promoter (2-3kb)    | ENSG00000241101 | 2905  |
| chr3 | 65877752 | 65878111 | 360 | Promoter (1-2kb)    | ENSG00000240175 | -1380 |
| chr3 | 69064823 | 69065218 | 396 | Promoter (1-2kb)    | ENSG00000244513 | 1507  |
| chr3 | 69080581 | 69080976 | 396 | Intron (ENST000005) | ENSG00000244513 | -3271 |
| chr3 | 69084767 | 69085162 | 396 | Promoter (<=1kb)    | ENSG00000244513 | 520   |
| chr3 | 69085141 | 69085500 | 360 | Promoter (<=1kb)    | ENSG00000244513 | 894   |
| chr3 | 69085347 | 69085706 | 360 | Promoter (1-2kb)    | ENSG00000244513 | 1100  |
| chr3 | 72150568 | 72150963 | 396 | Promoter (<=1kb)    | ENSG00000241163 | -343  |
| chr3 | 72150822 | 72151217 | 396 | Promoter (<=1kb)    | ENSG00000241163 | -597  |
| chr3 | 72152550 | 72152909 | 360 | Promoter (2-3kb)    | ENSG00000241163 | -2325 |
| chr3 | 72152662 | 72153057 | 396 | Promoter (2-3kb)    | ENSG00000241163 | -2437 |
| chr3 | 72152817 | 72153176 | 360 | Promoter (2-3kb)    | ENSG00000241163 | -2592 |
| chr3 | 72153529 | 72153888 | 360 | Intron (ENST000004) | ENSG00000241163 | -3304 |
| chr3 | 73674817 | 73675176 | 360 | Promoter (2-3kb)    | ENSG00000239677 | 2098  |
| chr3 | 81348991 | 81349350 | 360 | Promoter (2-3kb)    | ENSG00000241593 | -2495 |
| chr3 | 99218346 | 99218741 | 396 | Promoter (<=1kb)    | ENSG00000243296 | -450  |
| chr3 | 99895385 | 99895780 | 396 | Promoter (2-3kb)    | ENSG00000261533 | -2631 |
| chr3 | 99895713 | 99896108 | 396 | Promoter (2-3kb)    | ENSG00000261533 | -2303 |
| chr3 | 99895934 | 99896329 | 396 | Promoter (2-3kb)    | ENSG00000261533 | -2082 |
| chr3 | 99901350 | 99901745 | 396 | Promoter (2-3kb)    | ENSG00000261533 | 2939  |
| chr3 | 1E+08    | 1E+08    | 396 | Distal Intergenic   | ENSG00000273488 | -3863 |
| chr3 | 1E+08    | 1E+08    | 396 | Distal Intergenic   | ENSG00000273488 | -3628 |
| chr3 | 1E+08    | 1E+08    | 360 | Promoter (2-3kb)    | ENSG00000273488 | -2724 |
| chr3 | 1E+08    | 1E+08    | 396 | Promoter (1-2kb)    | ENSG00000273488 | -1629 |
| chr3 | 1.02E+08 | 1.02E+08 | 396 | Promoter (2-3kb)    | ENSG00000241280 | -2359 |
| chr3 | 1.02E+08 | 1.02E+08 | 396 | Promoter (1-2kb)    | ENSG00000241280 | -1906 |
| chr3 | 1.02E+08 | 1.02E+08 | 360 | Promoter (1-2kb)    | ENSG00000241280 | -1858 |
| chr3 | 1.02E+08 | 1.02E+08 | 396 | Promoter (<=1kb)    | ENSG00000241280 | -698  |
| chr3 | 1.02E+08 | 1.02E+08 | 360 | Promoter (2-3kb)    | ENSG00000241280 | 2649  |
| chr3 | 1.08E+08 | 1.08E+08 | 396 | Promoter (<=1kb)    | ENSG00000241469 | -695  |

|      |          |          |     |                    |                 |       |
|------|----------|----------|-----|--------------------|-----------------|-------|
| chr3 | 1.12E+08 | 1.12E+08 | 360 | Promoter (1-2kb)   | ENSG00000239482 | -1772 |
| chr3 | 1.18E+08 | 1.18E+08 | 360 | Promoter (<=1kb)   | ENSG00000239268 | -943  |
| chr3 | 1.19E+08 | 1.19E+08 | 396 | Promoter (<=1kb)   | ENSG00000240254 | 340   |
| chr3 | 1.19E+08 | 1.19E+08 | 396 | Promoter (<=1kb)   | ENSG00000272662 | -958  |
| chr3 | 1.19E+08 | 1.19E+08 | 396 | Promoter (<=1kb)   | ENSG00000239994 | 33    |
| chr3 | 1.19E+08 | 1.19E+08 | 396 | Promoter (<=1kb)   | ENSG00000239994 | 0     |
| chr3 | 1.23E+08 | 1.23E+08 | 396 | Promoter (2-3kb)   | ENSG00000273033 | -2016 |
| chr3 | 1.26E+08 | 1.26E+08 | 396 | Promoter (2-3kb)   | ENSG00000241288 | -2443 |
| chr3 | 1.26E+08 | 1.26E+08 | 396 | Intron (ENST000004 | ENSG00000241288 | -4200 |
| chr3 | 1.26E+08 | 1.26E+08 | 360 | Intron (ENST000004 | ENSG00000241288 | -4219 |
| chr3 | 1.26E+08 | 1.26E+08 | 396 | Intron (ENST000004 | ENSG00000241288 | -4403 |
| chr3 | 1.27E+08 | 1.27E+08 | 360 | Distal Intergenic  | ENSG00000244215 | -3485 |
| chr3 | 1.27E+08 | 1.27E+08 | 360 | Distal Intergenic  | ENSG00000244215 | -3705 |
| chr3 | 1.27E+08 | 1.27E+08 | 396 | Distal Intergenic  | ENSG00000244215 | -4078 |
| chr3 | 1.27E+08 | 1.27E+08 | 396 | Promoter (<=1kb)   | ENSG00000239921 | 649   |
| chr3 | 1.28E+08 | 1.28E+08 | 396 | Promoter (1-2kb)   | ENSG00000242049 | -1431 |
| chr3 | 1.29E+08 | 1.29E+08 | 360 | Promoter (<=1kb)   | ENSG00000231305 | -84   |
| chr3 | 1.29E+08 | 1.29E+08 | 396 | Promoter (<=1kb)   | ENSG00000231305 | -137  |
| chr3 | 1.29E+08 | 1.29E+08 | 396 | Promoter (<=1kb)   | ENSG00000231305 | -563  |
| chr3 | 1.29E+08 | 1.29E+08 | 396 | Promoter (2-3kb)   | ENSG00000273437 | 2906  |
| chr3 | 1.29E+08 | 1.29E+08 | 360 | Promoter (2-3kb)   | ENSG00000273437 | 2894  |
| chr3 | 1.29E+08 | 1.29E+08 | 396 | Promoter (1-2kb)   | ENSG00000273437 | 1927  |
| chr3 | 1.3E+08  | 1.3E+08  | 360 | Promoter (<=1kb)   | ENSG00000271270 | -354  |
| chr3 | 1.3E+08  | 1.3E+08  | 396 | Promoter (1-2kb)   | ENSG00000271270 | 1684  |
| chr3 | 1.3E+08  | 1.3E+08  | 360 | Promoter (2-3kb)   | ENSG00000271270 | 2807  |
| chr3 | 1.3E+08  | 1.3E+08  | 360 | Promoter (2-3kb)   | ENSG00000250643 | 2706  |
| chr3 | 1.3E+08  | 1.3E+08  | 360 | Promoter (<=1kb)   | ENSG00000250643 | 242   |
| chr3 | 1.3E+08  | 1.3E+08  | 360 | Promoter (<=1kb)   | ENSG00000250643 | 30    |
| chr3 | 1.3E+08  | 1.3E+08  | 360 | Promoter (<=1kb)   | ENSG00000250643 | 0     |
| chr3 | 1.33E+08 | 1.33E+08 | 360 | Promoter (<=1kb)   | ENSG00000272832 | 278   |
| chr3 | 1.33E+08 | 1.33E+08 | 360 | Promoter (<=1kb)   | ENSG00000272832 | -652  |
| chr3 | 1.34E+08 | 1.34E+08 | 360 | Promoter (<=1kb)   | ENSG00000243832 | 191   |
| chr3 | 1.34E+08 | 1.34E+08 | 396 | Distal Intergenic  | ENSG00000243832 | -4234 |
| chr3 | 1.34E+08 | 1.34E+08 | 360 | Distal Intergenic  | ENSG00000243832 | -4274 |
| chr3 | 1.34E+08 | 1.34E+08 | 396 | Distal Intergenic  | ENSG00000240006 | -3489 |
| chr3 | 1.34E+08 | 1.34E+08 | 360 | Promoter (2-3kb)   | ENSG00000240006 | -2412 |
| chr3 | 1.37E+08 | 1.37E+08 | 396 | Intron (ENST000004 | ENSG00000273486 | -4891 |
| chr3 | 1.37E+08 | 1.37E+08 | 396 | Promoter (1-2kb)   | ENSG00000239213 | 1236  |
| chr3 | 1.39E+08 | 1.39E+08 | 360 | Distal Intergenic  | ENSG00000232416 | -4609 |
| chr3 | 1.39E+08 | 1.39E+08 | 360 | Promoter (<=1kb)   | ENSG00000232416 | 477   |
| chr3 | 1.39E+08 | 1.39E+08 | 360 | Promoter (1-2kb)   | ENSG00000232416 | 1230  |
| chr3 | 1.39E+08 | 1.39E+08 | 360 | Promoter (1-2kb)   | ENSG00000232416 | 1433  |
| chr3 | 1.39E+08 | 1.39E+08 | 360 | Promoter (2-3kb)   | ENSG00000248932 | 2485  |
| chr3 | 1.42E+08 | 1.42E+08 | 360 | Distal Intergenic  | ENSG00000272565 | -4553 |
| chr3 | 1.43E+08 | 1.43E+08 | 396 | Distal Intergenic  | ENSG00000268129 | -3545 |
| chr3 | 1.43E+08 | 1.43E+08 | 360 | Distal Intergenic  | ENSG00000268129 | -3610 |
| chr3 | 1.43E+08 | 1.43E+08 | 360 | Distal Intergenic  | ENSG00000268129 | -3811 |
| chr3 | 1.43E+08 | 1.43E+08 | 396 | Distal Intergenic  | ENSG00000268129 | -4687 |
| chr3 | 1.43E+08 | 1.43E+08 | 360 | Distal Intergenic  | ENSG00000268129 | -4743 |
| chr3 | 1.43E+08 | 1.43E+08 | 396 | Promoter (1-2kb)   | ENSG00000243733 | -1654 |
| chr3 | 1.46E+08 | 1.46E+08 | 360 | Promoter (1-2kb)   | ENSG00000240032 | 1065  |
| chr3 | 1.47E+08 | 1.47E+08 | 396 | Intron (ENST000004 | ENSG00000242671 | -4694 |
| chr3 | 1.47E+08 | 1.47E+08 | 396 | Promoter (1-2kb)   | ENSG00000242671 | -1431 |
| chr3 | 1.47E+08 | 1.47E+08 | 360 | Promoter (1-2kb)   | ENSG00000242671 | -1368 |
| chr3 | 1.49E+08 | 1.49E+08 | 360 | Promoter (<=1kb)   | ENSG00000240541 | -726  |
| chr3 | 1.49E+08 | 1.49E+08 | 360 | Promoter (<=1kb)   | ENSG00000241985 | 504   |
| chr3 | 1.49E+08 | 1.49E+08 | 396 | Promoter (<=1kb)   | ENSG00000241985 | 411   |
| chr3 | 1.49E+08 | 1.49E+08 | 396 | Promoter (<=1kb)   | ENSG00000241985 | -348  |

|      |          |          |     |                    |                 |       |
|------|----------|----------|-----|--------------------|-----------------|-------|
| chr3 | 1.49E+08 | 1.49E+08 | 360 | Promoter (<=1kb)   | ENSG00000241985 | -413  |
| chr3 | 1.49E+08 | 1.49E+08 | 396 | Promoter (<=1kb)   | ENSG00000241985 | -984  |
| chr3 | 1.49E+08 | 1.49E+08 | 396 | Promoter (1-2kb)   | ENSG00000241985 | -1187 |
| chr3 | 1.49E+08 | 1.49E+08 | 396 | Promoter (1-2kb)   | ENSG00000241313 | -1471 |
| chr3 | 1.49E+08 | 1.49E+08 | 396 | Promoter (<=1kb)   | ENSG00000241313 | -100  |
| chr3 | 1.49E+08 | 1.49E+08 | 396 | Promoter (<=1kb)   | ENSG00000241313 | 0     |
| chr3 | 1.49E+08 | 1.49E+08 | 360 | Promoter (1-2kb)   | ENSG00000241313 | 1389  |
| chr3 | 1.49E+08 | 1.49E+08 | 396 | Promoter (1-2kb)   | ENSG00000241313 | 1630  |
| chr3 | 1.49E+08 | 1.49E+08 | 360 | Promoter (1-2kb)   | ENSG00000241313 | 1659  |
| chr3 | 1.49E+08 | 1.49E+08 | 360 | Promoter (1-2kb)   | ENSG00000241313 | 1860  |
| chr3 | 1.5E+08  | 1.5E+08  | 396 | Distal Intergenic  | ENSG00000243944 | -4275 |
| chr3 | 1.5E+08  | 1.5E+08  | 360 | Distal Intergenic  | ENSG00000243944 | -4261 |
| chr3 | 1.5E+08  | 1.5E+08  | 396 | Promoter (<=1kb)   | ENSG00000243944 | -969  |
| chr3 | 1.5E+08  | 1.5E+08  | 396 | Promoter (<=1kb)   | ENSG00000243944 | -763  |
| chr3 | 1.5E+08  | 1.5E+08  | 360 | Promoter (<=1kb)   | ENSG00000243944 | -563  |
| chr3 | 1.5E+08  | 1.5E+08  | 396 | Promoter (<=1kb)   | ENSG00000243944 | -15   |
| chr3 | 1.5E+08  | 1.5E+08  | 360 | Promoter (1-2kb)   | ENSG00000244265 | -1032 |
| chr3 | 1.51E+08 | 1.51E+08 | 396 | Intron (ENST000004 | ENSG00000243273 | -4860 |
| chr3 | 1.51E+08 | 1.51E+08 | 396 | Intron (ENST000004 | ENSG00000243273 | -4657 |
| chr3 | 1.51E+08 | 1.51E+08 | 396 | Intron (ENST000004 | ENSG00000243273 | -4141 |
| chr3 | 1.52E+08 | 1.52E+08 | 396 | Distal Intergenic  | ENSG00000242908 | -3011 |
| chr3 | 1.52E+08 | 1.52E+08 | 396 | Promoter (2-3kb)   | ENSG00000243305 | -2581 |
| chr3 | 1.52E+08 | 1.52E+08 | 396 | Promoter (2-3kb)   | ENSG00000243305 | -2818 |
| chr3 | 1.52E+08 | 1.52E+08 | 360 | Promoter (1-2kb)   | ENSG00000244545 | -1707 |
| chr3 | 1.52E+08 | 1.52E+08 | 360 | Promoter (<=1kb)   | ENSG00000244545 | 441   |
| chr3 | 1.53E+08 | 1.53E+08 | 360 | Promoter (1-2kb)   | ENSG00000241912 | 1105  |
| chr3 | 1.55E+08 | 1.55E+08 | 396 | Promoter (2-3kb)   | ENSG00000243953 | 2713  |
| chr3 | 1.55E+08 | 1.55E+08 | 360 | Distal Intergenic  | ENSG00000240666 | -3465 |
| chr3 | 1.55E+08 | 1.55E+08 | 396 | Distal Intergenic  | ENSG00000242925 | -4621 |
| chr3 | 1.55E+08 | 1.55E+08 | 396 | Distal Intergenic  | ENSG00000242925 | -4396 |
| chr3 | 1.58E+08 | 1.58E+08 | 396 | Promoter (1-2kb)   | ENSG00000240207 | 1177  |
| chr3 | 1.6E+08  | 1.6E+08  | 360 | Intron (ENST000004 | ENSG00000244040 | -3731 |
| chr3 | 1.62E+08 | 1.62E+08 | 360 | Promoter (2-3kb)   | ENSG00000240354 | 2706  |
| chr3 | 1.68E+08 | 1.68E+08 | 360 | Distal Intergenic  | ENSG00000241882 | -3203 |
| chr3 | 1.69E+08 | 1.69E+08 | 360 | Promoter (<=1kb)   | ENSG00000242268 | -29   |
| chr3 | 1.69E+08 | 1.69E+08 | 396 | Promoter (<=1kb)   | ENSG00000242268 | 0     |
| chr3 | 1.69E+08 | 1.69E+08 | 360 | Promoter (1-2kb)   | ENSG00000270141 | 1765  |
| chr3 | 1.7E+08  | 1.7E+08  | 360 | Promoter (2-3kb)   | ENSG00000242578 | -2517 |
| chr3 | 1.72E+08 | 1.72E+08 | 396 | Promoter (2-3kb)   | ENSG00000223387 | 2427  |
| chr3 | 1.72E+08 | 1.72E+08 | 360 | Promoter (<=1kb)   | ENSG00000223387 | 135   |
| chr3 | 1.72E+08 | 1.72E+08 | 360 | Promoter (<=1kb)   | ENSG00000223387 | 0     |
| chr3 | 1.72E+08 | 1.72E+08 | 360 | Distal Intergenic  | ENSG00000223387 | -4426 |
| chr3 | 1.77E+08 | 1.77E+08 | 396 | Promoter (1-2kb)   | ENSG00000226782 | -1963 |
| chr3 | 1.77E+08 | 1.77E+08 | 360 | Promoter (2-3kb)   | ENSG00000228221 | 2477  |
| chr3 | 1.77E+08 | 1.77E+08 | 396 | Intron (ENST000004 | ENSG00000228221 | -4097 |
| chr3 | 1.77E+08 | 1.77E+08 | 396 | Promoter (1-2kb)   | ENSG00000236385 | 1927  |
| chr3 | 1.77E+08 | 1.77E+08 | 396 | Promoter (<=1kb)   | ENSG00000236385 | 187   |
| chr3 | 1.77E+08 | 1.77E+08 | 396 | Promoter (<=1kb)   | ENSG00000228221 | 714   |
| chr3 | 1.78E+08 | 1.78E+08 | 396 | Intron (ENST000004 | ENSG00000231574 | -3940 |
| chr3 | 1.78E+08 | 1.78E+08 | 396 | Promoter (1-2kb)   | ENSG00000225790 | 1399  |
| chr3 | 1.8E+08  | 1.8E+08  | 396 | Promoter (2-3kb)   | ENSG00000241696 | -2404 |
| chr3 | 1.81E+08 | 1.81E+08 | 360 | Promoter (<=1kb)   | ENSG00000242808 | 450   |
| chr3 | 1.82E+08 | 1.82E+08 | 396 | Promoter (1-2kb)   | ENSG00000242012 | -1648 |
| chr3 | 1.83E+08 | 1.83E+08 | 360 | Promoter (<=1kb)   | ENSG00000242522 | 0     |
| chr3 | 1.86E+08 | 1.86E+08 | 360 | Promoter (1-2kb)   | ENSG00000224406 | 1847  |
| chr3 | 1.86E+08 | 1.86E+08 | 396 | Promoter (<=1kb)   | ENSG00000224406 | 758   |
| chr3 | 1.86E+08 | 1.86E+08 | 360 | Promoter (<=1kb)   | ENSG00000197099 | 301   |
| chr3 | 1.87E+08 | 1.87E+08 | 360 | Distal Intergenic  | ENSG00000231724 | -4475 |

|      |          |          |     |                     |                 |       |
|------|----------|----------|-----|---------------------|-----------------|-------|
| chr3 | 1.87E+08 | 1.87E+08 | 360 | Promoter (2-3kb)    | ENSG00000231724 | -2415 |
| chr3 | 1.87E+08 | 1.87E+08 | 396 | Promoter (1-2kb)    | ENSG00000231724 | -1724 |
| chr3 | 1.87E+08 | 1.87E+08 | 360 | Promoter (<=1kb)    | ENSG00000231724 | 230   |
| chr3 | 1.87E+08 | 1.87E+08 | 396 | Promoter (2-3kb)    | ENSG00000226482 | 2875  |
| chr3 | 1.87E+08 | 1.87E+08 | 396 | Promoter (<=1kb)    | ENSG00000228952 | 345   |
| chr3 | 1.87E+08 | 1.87E+08 | 360 | Promoter (<=1kb)    | ENSG00000223401 | -441  |
| chr3 | 1.88E+08 | 1.88E+08 | 360 | Promoter (<=1kb)    | ENSG00000236412 | 823   |
| chr3 | 1.88E+08 | 1.88E+08 | 396 | Promoter (<=1kb)    | ENSG00000224563 | 0     |
| chr3 | 1.88E+08 | 1.88E+08 | 360 | Distal Intergenic   | ENSG00000224563 | -3885 |
| chr3 | 1.88E+08 | 1.88E+08 | 360 | Distal Intergenic   | ENSG00000224563 | -4106 |
| chr3 | 1.89E+08 | 1.89E+08 | 360 | Promoter (<=1kb)    | ENSG00000234076 | -763  |
| chr3 | 1.94E+08 | 1.94E+08 | 396 | Intron (ENST000003) | ENSG00000238043 | -4362 |
| chr3 | 1.94E+08 | 1.94E+08 | 360 | Promoter (<=1kb)    | ENSG00000230102 | -910  |
| chr3 | 1.94E+08 | 1.94E+08 | 396 | Promoter (1-2kb)    | ENSG00000230102 | -1250 |
| chr3 | 1.94E+08 | 1.94E+08 | 360 | Promoter (<=1kb)    | ENSG00000230102 | 685   |
| chr3 | 1.94E+08 | 1.94E+08 | 396 | Promoter (2-3kb)    | ENSG00000214145 | -2598 |
| chr3 | 1.94E+08 | 1.94E+08 | 396 | Promoter (<=1kb)    | ENSG00000214145 | 10    |
| chr3 | 1.94E+08 | 1.94E+08 | 396 | Promoter (<=1kb)    | ENSG00000214145 | -560  |
| chr3 | 1.94E+08 | 1.94E+08 | 396 | Distal Intergenic   | ENSG00000231770 | -3832 |
| chr3 | 1.94E+08 | 1.94E+08 | 396 | Promoter (2-3kb)    | ENSG00000230401 | 2239  |
| chr3 | 1.94E+08 | 1.94E+08 | 396 | Promoter (1-2kb)    | ENSG00000230401 | 1975  |
| chr3 | 1.94E+08 | 1.94E+08 | 396 | Intron (ENST000004) | ENSG00000237222 | -3937 |
| chr3 | 1.95E+08 | 1.95E+08 | 360 | Distal Intergenic   | ENSG00000233303 | -4894 |
| chr3 | 1.95E+08 | 1.95E+08 | 360 | Promoter (2-3kb)    | ENSG00000233303 | 2324  |
| chr3 | 1.95E+08 | 1.95E+08 | 396 | Promoter (<=1kb)    | ENSG00000223711 | -152  |
| chr3 | 1.95E+08 | 1.95E+08 | 360 | Promoter (<=1kb)    | ENSG00000223711 | -180  |
| chr3 | 1.95E+08 | 1.95E+08 | 360 | Promoter (<=1kb)    | ENSG00000223711 | 0     |
| chr3 | 1.95E+08 | 1.95E+08 | 396 | Promoter (<=1kb)    | ENSG00000223711 | 0     |
| chr3 | 1.95E+08 | 1.95E+08 | 360 | Promoter (<=1kb)    | ENSG00000223711 | 0     |
| chr3 | 1.95E+08 | 1.95E+08 | 396 | Promoter (<=1kb)    | ENSG00000223711 | 729   |
| chr3 | 1.95E+08 | 1.95E+08 | 360 | Promoter (<=1kb)    | ENSG00000223711 | 730   |
| chr3 | 1.95E+08 | 1.95E+08 | 396 | Promoter (<=1kb)    | ENSG00000223711 | 955   |
| chr3 | 1.96E+08 | 1.96E+08 | 396 | Promoter (2-3kb)    | ENSG00000225822 | 2176  |
| chr3 | 1.96E+08 | 1.96E+08 | 360 | Distal Intergenic   | ENSG00000273013 | -4984 |
| chr3 | 1.96E+08 | 1.96E+08 | 360 | Distal Intergenic   | ENSG00000273013 | -4740 |
| chr3 | 1.96E+08 | 1.96E+08 | 396 | Promoter (<=1kb)    | ENSG00000273013 | 604   |
| chr3 | 1.96E+08 | 1.96E+08 | 360 | Promoter (<=1kb)    | ENSG00000273013 | 857   |
| chr3 | 1.96E+08 | 1.96E+08 | 396 | Distal Intergenic   | ENSG00000232065 | -4445 |
| chr3 | 1.97E+08 | 1.97E+08 | 360 | Distal Intergenic   | ENSG00000225578 | -3107 |
| chr3 | 1.97E+08 | 1.97E+08 | 360 | Promoter (2-3kb)    | ENSG00000227375 | 2927  |
| chr3 | 1.97E+08 | 1.97E+08 | 396 | Promoter (1-2kb)    | ENSG00000273308 | -1274 |
| chr3 | 1.97E+08 | 1.97E+08 | 396 | Promoter (1-2kb)    | ENSG00000273308 | -1056 |
| chr3 | 1.97E+08 | 1.97E+08 | 360 | Promoter (1-2kb)    | ENSG00000273308 | -1081 |
| chr3 | 1.97E+08 | 1.97E+08 | 360 | Promoter (<=1kb)    | ENSG00000273308 | -876  |
| chr3 | 1.97E+08 | 1.97E+08 | 396 | Promoter (<=1kb)    | ENSG00000273308 | -759  |
| chr3 | 1.98E+08 | 1.98E+08 | 396 | Promoter (<=1kb)    | ENSG00000236438 | 549   |
| chr4 | 658848   | 659243   | 396 | Distal Intergenic   | ENSG00000272927 | -3114 |
| chr4 | 774803   | 775162   | 360 | Promoter (<=1kb)    | ENSG00000249592 | 456   |
| chr4 | 776047   | 776442   | 396 | Promoter (<=1kb)    | ENSG00000249592 | -410  |
| chr4 | 778048   | 778407   | 360 | Promoter (2-3kb)    | ENSG00000249592 | -2411 |
| chr4 | 778248   | 778607   | 360 | Promoter (2-3kb)    | ENSG00000249592 | -2611 |
| chr4 | 1345706  | 1346101  | 396 | Distal Intergenic   | ENSG00000254094 | -4268 |
| chr4 | 1346789  | 1347184  | 396 | Distal Intergenic   | ENSG00000254094 | -3185 |
| chr4 | 1347010  | 1347405  | 396 | Promoter (2-3kb)    | ENSG00000254094 | -2964 |
| chr4 | 1347279  | 1347674  | 396 | Promoter (2-3kb)    | ENSG00000254094 | -2695 |
| chr4 | 1348630  | 1348989  | 360 | Promoter (1-2kb)    | ENSG00000254094 | -1380 |
| chr4 | 1352836  | 1353195  | 360 | Promoter (<=1kb)    | ENSG00000253399 | 569   |
| chr4 | 1711403  | 1711762  | 360 | Promoter (2-3kb)    | ENSG00000270195 | -2786 |

|      |          |          |     |                   |                 |       |
|------|----------|----------|-----|-------------------|-----------------|-------|
| chr4 | 1711648  | 1712043  | 396 | Promoter (2-3kb)  | ENSG00000270195 | -2505 |
| chr4 | 1712479  | 1712874  | 396 | Promoter (1-2kb)  | ENSG00000270195 | -1674 |
| chr4 | 1712509  | 1712868  | 360 | Promoter (1-2kb)  | ENSG00000270195 | -1680 |
| chr4 | 2139934  | 2140329  | 396 | Promoter (1-2kb)  | ENSG00000250623 | -1071 |
| chr4 | 2462588  | 2462983  | 396 | Promoter (2-3kb)  | ENSG00000248399 | -2541 |
| chr4 | 2468352  | 2468747  | 396 | Promoter (2-3kb)  | ENSG00000248399 | 2828  |
| chr4 | 2468435  | 2468794  | 360 | Promoter (2-3kb)  | ENSG00000248399 | 2911  |
| chr4 | 2934912  | 2935307  | 396 | Promoter (1-2kb)  | ENSG00000249673 | -1319 |
| chr4 | 2937168  | 2937563  | 396 | Promoter (<=1kb)  | ENSG00000249673 | 0     |
| chr4 | 2937373  | 2937768  | 396 | Promoter (<=1kb)  | ENSG00000249673 | 100   |
| chr4 | 3634123  | 3634518  | 396 | Promoter (<=1kb)  | ENSG00000250681 | -238  |
| chr4 | 3764760  | 3765155  | 396 | Promoter (<=1kb)  | ENSG00000250986 | 0     |
| chr4 | 3765348  | 3765743  | 396 | Promoter (<=1kb)  | ENSG00000250986 | -231  |
| chr4 | 3768912  | 3769271  | 360 | Distal Intergenic | ENSG00000250986 | -3795 |
| chr4 | 3953859  | 3954254  | 396 | Promoter (2-3kb)  | ENSG00000253917 | 2892  |
| chr4 | 3954081  | 3954476  | 396 | Promoter (2-3kb)  | ENSG00000253917 | 2670  |
| chr4 | 4486688  | 4487083  | 396 | Distal Intergenic | ENSG00000248221 | -3261 |
| chr4 | 4487097  | 4487456  | 360 | Distal Intergenic | ENSG00000248221 | -3670 |
| chr4 | 4540359  | 4540718  | 360 | Distal Intergenic | ENSG00000247708 | -3140 |
| chr4 | 4541149  | 4541544  | 396 | Promoter (2-3kb)  | ENSG00000247708 | -2314 |
| chr4 | 4541938  | 4542333  | 396 | Promoter (1-2kb)  | ENSG00000247708 | -1525 |
| chr4 | 6673053  | 6673412  | 360 | Promoter (1-2kb)  | ENSG00000170846 | -1766 |
| chr4 | 6673335  | 6673694  | 360 | Promoter (1-2kb)  | ENSG00000170846 | -1484 |
| chr4 | 6673557  | 6673916  | 360 | Promoter (1-2kb)  | ENSG00000170846 | -1262 |
| chr4 | 6680024  | 6680383  | 360 | Distal Intergenic | ENSG00000251580 | -4467 |
| chr4 | 6690125  | 6690520  | 396 | Promoter (1-2kb)  | ENSG00000246526 | 1726  |
| chr4 | 6690393  | 6690752  | 360 | Promoter (1-2kb)  | ENSG00000246526 | 1494  |
| chr4 | 6690441  | 6690836  | 396 | Promoter (1-2kb)  | ENSG00000246526 | 1410  |
| chr4 | 6690613  | 6690972  | 360 | Promoter (1-2kb)  | ENSG00000246526 | 1274  |
| chr4 | 6693105  | 6693500  | 396 | Promoter (<=1kb)  | ENSG00000246526 | -859  |
| chr4 | 6693363  | 6693758  | 396 | Promoter (1-2kb)  | ENSG00000246526 | -1117 |
| chr4 | 6693366  | 6693725  | 360 | Promoter (1-2kb)  | ENSG00000246526 | -1120 |
| chr4 | 6694756  | 6695151  | 396 | Promoter (2-3kb)  | ENSG00000246526 | -2510 |
| chr4 | 6695669  | 6696064  | 396 | Distal Intergenic | ENSG00000246526 | -3423 |
| chr4 | 6695689  | 6696048  | 360 | Distal Intergenic | ENSG00000246526 | -3443 |
| chr4 | 6695886  | 6696281  | 396 | Distal Intergenic | ENSG00000246526 | -3640 |
| chr4 | 6696167  | 6696526  | 360 | Distal Intergenic | ENSG00000246526 | -3921 |
| chr4 | 6696383  | 6696742  | 360 | Distal Intergenic | ENSG00000246526 | -4137 |
| chr4 | 7102018  | 7102413  | 396 | Promoter (2-3kb)  | ENSG00000245468 | 2643  |
| chr4 | 7102256  | 7102615  | 360 | Promoter (2-3kb)  | ENSG00000245468 | 2441  |
| chr4 | 7102459  | 7102818  | 360 | Promoter (2-3kb)  | ENSG00000245468 | 2238  |
| chr4 | 7750754  | 7751149  | 396 | Distal Intergenic | ENSG00000272620 | -4668 |
| chr4 | 8021750  | 8022145  | 396 | Promoter (2-3kb)  | ENSG00000273267 | -2247 |
| chr4 | 8066646  | 8067005  | 360 | Promoter (1-2kb)  | ENSG00000251460 | -1250 |
| chr4 | 10006226 | 10006621 | 396 | Promoter (1-2kb)  | ENSG00000250413 | -1485 |
| chr4 | 10006447 | 10006842 | 396 | Promoter (1-2kb)  | ENSG00000250413 | -1264 |
| chr4 | 10008059 | 10008418 | 360 | Promoter (<=1kb)  | ENSG00000250413 | 0     |
| chr4 | 13654138 | 13654497 | 360 | Promoter (2-3kb)  | ENSG00000250634 | -2306 |
| chr4 | 13654440 | 13654835 | 396 | Promoter (1-2kb)  | ENSG00000250634 | -1968 |
| chr4 | 13824565 | 13824960 | 396 | Promoter (2-3kb)  | ENSG00000250634 | 2831  |
| chr4 | 15001184 | 15001579 | 396 | Promoter (2-3kb)  | ENSG00000247624 | 2090  |
| chr4 | 15001954 | 15002313 | 360 | Promoter (1-2kb)  | ENSG00000247624 | 1356  |
| chr4 | 15001978 | 15002373 | 396 | Promoter (1-2kb)  | ENSG00000247624 | 1296  |
| chr4 | 15005545 | 15005904 | 360 | Promoter (1-2kb)  | ENSG00000247624 | -1876 |
| chr4 | 16226935 | 16227330 | 396 | Promoter (<=1kb)  | ENSG00000263327 | -956  |
| chr4 | 17077259 | 17077618 | 360 | Promoter (1-2kb)  | ENSG00000249998 | -1733 |
| chr4 | 17614494 | 17614853 | 360 | Promoter (1-2kb)  | ENSG00000249502 | 1341  |
| chr4 | 17614687 | 17615082 | 396 | Promoter (1-2kb)  | ENSG00000249502 | 1112  |

|      |          |          |     |                                     |                 |       |
|------|----------|----------|-----|-------------------------------------|-----------------|-------|
| chr4 | 17615244 | 17615603 | 360 | Promoter (<=1kb)                    | ENSG00000249502 | 591   |
| chr4 | 17615244 | 17615639 | 396 | Promoter (<=1kb)                    | ENSG00000249502 | 555   |
| chr4 | 17615500 | 17615859 | 360 | Promoter (<=1kb)                    | ENSG00000249502 | 335   |
| chr4 | 17617105 | 17617464 | 360 | Promoter (<=1kb)                    | ENSG00000249502 | -911  |
| chr4 | 17617991 | 17618350 | 360 | Promoter (1-2kb)                    | ENSG00000249502 | -1797 |
| chr4 | 19455320 | 19455679 | 360 | Promoter (1-2kb)                    | ENSG00000248515 | -1380 |
| chr4 | 23775973 | 23776368 | 396 | Distal Intergenic                   | ENSG00000249453 | -4845 |
| chr4 | 24662943 | 24663338 | 396 | Promoter (1-2kb)                    | ENSG00000261121 | 1464  |
| chr4 | 25767966 | 25768361 | 396 | Distal Intergenic                   | ENSG00000250541 | -3527 |
| chr4 | 26861388 | 26861783 | 396 | Promoter (<=1kb)                    | ENSG00000240005 | 83    |
| chr4 | 26861865 | 26862260 | 396 | Promoter (<=1kb)                    | ENSG00000240005 | 0     |
| chr4 | 26862347 | 26862706 | 360 | Promoter (<=1kb)                    | ENSG00000240005 | -126  |
| chr4 | 26863506 | 26863901 | 396 | Promoter (1-2kb)                    | ENSG00000240005 | -1285 |
| chr4 | 37592655 | 37593050 | 396 | Promoter (2-3kb)                    | ENSG00000248936 | -2158 |
| chr4 | 38291242 | 38291637 | 396 | Promoter (2-3kb)                    | ENSG00000251642 | 2627  |
| chr4 | 38365425 | 38365820 | 396 | Promoter (2-3kb)                    | ENSG00000248227 | -2715 |
| chr4 | 38560835 | 38561230 | 396 | Distal Intergenic                   | ENSG00000251635 | -4394 |
| chr4 | 38561449 | 38561808 | 360 | Distal Intergenic                   | ENSG00000251635 | -3816 |
| chr4 | 38561968 | 38562327 | 360 | Distal Intergenic                   | ENSG00000251635 | -3297 |
| chr4 | 38621057 | 38621416 | 360 | Promoter (<=1kb)                    | ENSG00000271958 | 0     |
| chr4 | 38663195 | 38663590 | 396 | Promoter (2-3kb)                    | ENSG00000231160 | 2659  |
| chr4 | 38666900 | 38667259 | 360 | Promoter (<=1kb)                    | ENSG00000231160 | -396  |
| chr4 | 38667073 | 38667468 | 396 | Promoter (<=1kb)                    | ENSG00000231160 | -569  |
| chr4 | 38667131 | 38667490 | 360 | Promoter (<=1kb)                    | ENSG00000231160 | -627  |
| chr4 | 38668473 | 38668868 | 396 | Promoter (1-2kb)                    | ENSG00000231160 | -1969 |
| chr4 | 39524974 | 39525369 | 396 | Distal Intergenic                   | ENSG00000249348 | -4270 |
| chr4 | 39527173 | 39527532 | 360 | Promoter (2-3kb)                    | ENSG00000249348 | -2107 |
| chr4 | 39527189 | 39527584 | 396 | Promoter (2-3kb)                    | ENSG00000249348 | -2055 |
| chr4 | 39527394 | 39527789 | 396 | Promoter (1-2kb)                    | ENSG00000249348 | -1850 |
| chr4 | 39527738 | 39528133 | 396 | Promoter (1-2kb)                    | ENSG00000249348 | -1506 |
| chr4 | 39527782 | 39528141 | 360 | Promoter (1-2kb)                    | ENSG00000249348 | -1498 |
| chr4 | 39528063 | 39528422 | 360 | Promoter (1-2kb)                    | ENSG00000249348 | -1217 |
| chr4 | 39529155 | 39529514 | 360 | Promoter (<=1kb)                    | ENSG00000249348 | -125  |
| chr4 | 39638759 | 39639118 | 360 | Promoter (1-2kb)                    | ENSG00000255458 | -1642 |
| chr4 | 39638871 | 39639266 | 396 | Promoter (1-2kb)                    | ENSG00000255458 | -1494 |
| chr4 | 39638959 | 39639318 | 360 | Promoter (1-2kb)                    | ENSG00000255458 | -1442 |
| chr4 | 39641261 | 39641656 | 396 | Promoter (<=1kb)                    | ENSG00000255458 | 460   |
| chr4 | 39649835 | 39650194 | 360 | Intron (ENST000005:ENSG00000255458) | ENSG00000255458 | -4630 |
| chr4 | 40315468 | 40315827 | 360 | Promoter (2-3kb)                    | ENSG00000249241 | -2675 |
| chr4 | 41884094 | 41884453 | 360 | Promoter (<=1kb)                    | ENSG00000245870 | 134   |
| chr4 | 41989505 | 41989900 | 396 | Promoter (1-2kb)                    | ENSG00000272862 | 1354  |
| chr4 | 41990663 | 41991022 | 360 | Promoter (<=1kb)                    | ENSG00000272862 | 232   |
| chr4 | 41991113 | 41991472 | 360 | Promoter (<=1kb)                    | ENSG00000272862 | 0     |
| chr4 | 41991874 | 41992269 | 396 | Promoter (<=1kb)                    | ENSG00000272862 | -620  |
| chr4 | 41995829 | 41996224 | 396 | Distal Intergenic                   | ENSG00000272862 | -4575 |
| chr4 | 41996033 | 41996428 | 396 | Distal Intergenic                   | ENSG00000272862 | -4779 |
| chr4 | 42655053 | 42655448 | 396 | Distal Intergenic                   | ENSG00000260519 | -4065 |
| chr4 | 42655964 | 42656323 | 360 | Distal Intergenic                   | ENSG00000260519 | -3190 |
| chr4 | 42656169 | 42656528 | 360 | Promoter (2-3kb)                    | ENSG00000260519 | -2985 |
| chr4 | 42656703 | 42657098 | 396 | Promoter (2-3kb)                    | ENSG00000260519 | -2415 |
| chr4 | 42657419 | 42657814 | 396 | Promoter (1-2kb)                    | ENSG00000260519 | -1699 |
| chr4 | 42657475 | 42657834 | 360 | Promoter (1-2kb)                    | ENSG00000260519 | -1679 |
| chr4 | 44701737 | 44702132 | 396 | Distal Intergenic                   | ENSG00000272936 | -4290 |
| chr4 | 52908766 | 52909125 | 360 | Promoter (1-2kb)                    | ENSG00000251040 | -1846 |
| chr4 | 53576970 | 53577329 | 360 | Promoter (1-2kb)                    | ENSG00000226950 | -1268 |
| chr4 | 54457714 | 54458073 | 360 | Promoter (1-2kb)                    | ENSG00000248494 | -1050 |
| chr4 | 56244680 | 56245039 | 360 | Promoter (2-3kb)                    | ENSG00000249700 | 2020  |
| chr4 | 56246350 | 56246745 | 396 | Promoter (<=1kb)                    | ENSG00000249700 | 314   |

|      |          |          |     |                     |                 |       |
|------|----------|----------|-----|---------------------|-----------------|-------|
| chr4 | 56255734 | 56256093 | 360 | Promoter (1-2kb)    | ENSG00000273257 | 1618  |
| chr4 | 68290972 | 68291331 | 360 | Intron (ENST000005) | ENSG00000250075 | -3254 |
| chr4 | 74577011 | 74577406 | 396 | Promoter (<=1kb)    | ENSG00000228277 | 992   |
| chr4 | 75513744 | 75514139 | 396 | Promoter (<=1kb)    | ENSG00000249942 | 525   |
| chr4 | 75513753 | 75514112 | 360 | Promoter (<=1kb)    | ENSG00000249942 | 552   |
| chr4 | 75514051 | 75514410 | 360 | Promoter (<=1kb)    | ENSG00000249942 | 254   |
| chr4 | 75514287 | 75514682 | 396 | Promoter (<=1kb)    | ENSG00000249942 | 0     |
| chr4 | 76897280 | 76897675 | 396 | Distal Intergenic   | ENSG00000245928 | -4268 |
| chr4 | 76899044 | 76899439 | 396 | Promoter (2-3kb)    | ENSG00000245928 | -2504 |
| chr4 | 80111776 | 80112135 | 360 | Intron (ENST000005) | ENSG00000249307 | -4853 |
| chr4 | 80116143 | 80116502 | 360 | Promoter (<=1kb)    | ENSG00000249307 | -486  |
| chr4 | 80751462 | 80751857 | 396 | Promoter (2-3kb)    | ENSG00000251321 | 2773  |
| chr4 | 84651016 | 84651375 | 360 | Promoter (1-2kb)    | ENSG00000249171 | 1533  |
| chr4 | 86926886 | 86927245 | 360 | Distal Intergenic   | ENSG00000273389 | -4967 |
| chr4 | 86934111 | 86934470 | 360 | Promoter (<=1kb)    | ENSG00000261496 | 557   |
| chr4 | 86934343 | 86934702 | 360 | Promoter (<=1kb)    | ENSG00000261496 | 325   |
| chr4 | 86935084 | 86935479 | 396 | Promoter (<=1kb)    | ENSG00000261496 | -57   |
| chr4 | 86935174 | 86935533 | 360 | Promoter (<=1kb)    | ENSG00000261496 | -147  |
| chr4 | 86936374 | 86936733 | 360 | Promoter (1-2kb)    | ENSG00000261496 | -1347 |
| chr4 | 86936390 | 86936785 | 396 | Promoter (1-2kb)    | ENSG00000261496 | -1363 |
| chr4 | 86939448 | 86939843 | 396 | Distal Intergenic   | ENSG00000261496 | -4421 |
| chr4 | 86939979 | 86940374 | 396 | Distal Intergenic   | ENSG00000261496 | -4952 |
| chr4 | 88185999 | 88186394 | 396 | Promoter (1-2kb)    | ENSG00000250572 | 1580  |
| chr4 | 88591879 | 88592274 | 396 | Promoter (1-2kb)    | ENSG00000249001 | 1917  |
| chr4 | 88592150 | 88592545 | 396 | Promoter (1-2kb)    | ENSG00000249001 | 1646  |
| chr4 | 88597355 | 88597714 | 360 | Intron (ENST000005) | ENSG00000249001 | -3164 |
| chr4 | 88597401 | 88597796 | 396 | Intron (ENST000005) | ENSG00000249001 | -3210 |
| chr4 | 88653372 | 88653731 | 360 | Promoter (<=1kb)    | ENSG00000249001 | 0     |
| chr4 | 89641054 | 89641449 | 396 | Promoter (1-2kb)    | ENSG00000248019 | -1417 |
| chr4 | 1.01E+08 | 1.01E+08 | 360 | Promoter (1-2kb)    | ENSG00000249710 | -1774 |
| chr4 | 1.05E+08 | 1.05E+08 | 360 | Intron (ENST000005) | ENSG00000250670 | -4816 |
| chr4 | 1.05E+08 | 1.05E+08 | 396 | Intron (ENST000005) | ENSG00000250670 | -4753 |
| chr4 | 1.05E+08 | 1.05E+08 | 360 | Intron (ENST000005) | ENSG00000250670 | -3861 |
| chr4 | 1.05E+08 | 1.05E+08 | 396 | Intron (ENST000005) | ENSG00000250670 | -3802 |
| chr4 | 1.05E+08 | 1.05E+08 | 360 | Intron (ENST000005) | ENSG00000250670 | -3659 |
| chr4 | 1.05E+08 | 1.05E+08 | 396 | Intron (ENST000005) | ENSG00000250670 | -3587 |
| chr4 | 1.06E+08 | 1.06E+08 | 360 | Promoter (2-3kb)    | ENSG00000250522 | 2549  |
| chr4 | 1.1E+08  | 1.1E+08  | 360 | Promoter (<=1kb)    | ENSG00000247950 | 439   |
| chr4 | 1.1E+08  | 1.1E+08  | 360 | Promoter (<=1kb)    | ENSG00000247950 | 239   |
| chr4 | 1.13E+08 | 1.13E+08 | 396 | Promoter (<=1kb)    | ENSG00000248656 | -197  |
| chr4 | 1.13E+08 | 1.13E+08 | 396 | Promoter (<=1kb)    | ENSG00000250855 | -976  |
| chr4 | 1.13E+08 | 1.13E+08 | 396 | Promoter (1-2kb)    | ENSG00000260526 | 1434  |
| chr4 | 1.14E+08 | 1.14E+08 | 396 | Promoter (<=1kb)    | ENSG00000249532 | 0     |
| chr4 | 1.18E+08 | 1.18E+08 | 396 | Intron (ENST000004) | ENSG00000228358 | -3544 |
| chr4 | 1.18E+08 | 1.18E+08 | 396 | Promoter (2-3kb)    | ENSG00000228358 | -2614 |
| chr4 | 1.18E+08 | 1.18E+08 | 396 | Promoter (2-3kb)    | ENSG00000228358 | -2409 |
| chr4 | 1.18E+08 | 1.18E+08 | 360 | Promoter (1-2kb)    | ENSG00000228358 | -1401 |
| chr4 | 1.18E+08 | 1.18E+08 | 396 | Promoter (1-2kb)    | ENSG00000228358 | -1318 |
| chr4 | 1.18E+08 | 1.18E+08 | 396 | Promoter (1-2kb)    | ENSG00000228358 | -1004 |
| chr4 | 1.18E+08 | 1.18E+08 | 396 | Promoter (<=1kb)    | ENSG00000228358 | 123   |
| chr4 | 1.19E+08 | 1.19E+08 | 396 | Promoter (<=1kb)    | ENSG00000229565 | -558  |
| chr4 | 1.22E+08 | 1.22E+08 | 360 | Promoter (2-3kb)    | ENSG00000250344 | -2795 |
| chr4 | 1.24E+08 | 1.24E+08 | 396 | Promoter (2-3kb)    | ENSG00000227145 | -2123 |
| chr4 | 1.24E+08 | 1.24E+08 | 396 | Promoter (1-2kb)    | ENSG00000227145 | -1921 |
| chr4 | 1.29E+08 | 1.29E+08 | 360 | Promoter (2-3kb)    | ENSG00000251432 | -2929 |
| chr4 | 1.3E+08  | 1.3E+08  | 396 | Promoter (2-3kb)    | ENSG00000250193 | -2042 |
| chr4 | 1.32E+08 | 1.32E+08 | 396 | Distal Intergenic   | ENSG00000250503 | -3702 |
| chr4 | 1.34E+08 | 1.34E+08 | 396 | Promoter (1-2kb)    | ENSG00000249513 | -1721 |



|      |          |          |     |                     |                 |       |
|------|----------|----------|-----|---------------------|-----------------|-------|
| chr4 | 1.37E+08 | 1.37E+08 | 396 | Intron (ENST000005) | ENSG00000248330 | -3175 |
| chr4 | 1.37E+08 | 1.37E+08 | 360 | Promoter (1-2kb)    | ENSG00000248330 | -1886 |
| chr4 | 1.38E+08 | 1.38E+08 | 396 | Intron (ENST000005) | ENSG00000250341 | -3003 |
| chr4 | 1.39E+08 | 1.39E+08 | 396 | Promoter (1-2kb)    | ENSG00000250033 | 1175  |
| chr4 | 1.39E+08 | 1.39E+08 | 360 | Promoter (1-2kb)    | ENSG00000250033 | -1034 |
| chr4 | 1.39E+08 | 1.39E+08 | 360 | Intron (ENST000005) | ENSG00000248307 | -3309 |
| chr4 | 1.39E+08 | 1.39E+08 | 396 | Intron (ENST000005) | ENSG00000248307 | -3463 |
| chr4 | 1.39E+08 | 1.39E+08 | 360 | Intron (ENST000005) | ENSG00000248307 | -3517 |
| chr4 | 1.39E+08 | 1.39E+08 | 360 | Intron (ENST000005) | ENSG00000248307 | -4438 |
| chr4 | 1.39E+08 | 1.39E+08 | 396 | Intron (ENST000005) | ENSG00000250033 | -4881 |
| chr4 | 1.39E+08 | 1.39E+08 | 396 | Promoter (<=1kb)    | ENSG00000248307 | -921  |
| chr4 | 1.4E+08  | 1.4E+08  | 396 | Distal Intergenic   | ENSG00000250501 | -4963 |
| chr4 | 1.4E+08  | 1.4E+08  | 360 | Promoter (1-2kb)    | ENSG00000250501 | -1717 |
| chr4 | 1.4E+08  | 1.4E+08  | 360 | Promoter (<=1kb)    | ENSG00000250195 | -337  |
| chr4 | 1.4E+08  | 1.4E+08  | 360 | Promoter (1-2kb)    | ENSG00000250577 | 1222  |
| chr4 | 1.4E+08  | 1.4E+08  | 360 | Intron (ENST000005) | ENSG00000250577 | -3424 |
| chr4 | 1.4E+08  | 1.4E+08  | 360 | Intron (ENST000005) | ENSG00000250577 | -3653 |
| chr4 | 1.4E+08  | 1.4E+08  | 360 | Promoter (1-2kb)    | ENSG00000250195 | 1784  |
| chr4 | 1.4E+08  | 1.4E+08  | 396 | Promoter (<=1kb)    | ENSG00000250195 | 36    |
| chr4 | 1.4E+08  | 1.4E+08  | 360 | Promoter (1-2kb)    | ENSG00000273247 | 1601  |
| chr4 | 1.4E+08  | 1.4E+08  | 396 | Promoter (<=1kb)    | ENSG00000273247 | 998   |
| chr4 | 1.4E+08  | 1.4E+08  | 360 | Promoter (<=1kb)    | ENSG00000273247 | 921   |
| chr4 | 1.43E+08 | 1.43E+08 | 360 | Promoter (<=1kb)    | ENSG00000249806 | 489   |
| chr4 | 1.43E+08 | 1.43E+08 | 360 | Promoter (<=1kb)    | ENSG00000249806 | 742   |
| chr4 | 1.45E+08 | 1.45E+08 | 396 | Promoter (2-3kb)    | ENSG00000246448 | 2626  |
| chr4 | 1.45E+08 | 1.45E+08 | 396 | Promoter (1-2kb)    | ENSG00000251600 | -1921 |
| chr4 | 1.45E+08 | 1.45E+08 | 396 | Promoter (2-3kb)    | ENSG00000251600 | 2999  |
| chr4 | 1.47E+08 | 1.47E+08 | 360 | Promoter (1-2kb)    | ENSG00000248686 | 1280  |
| chr4 | 1.47E+08 | 1.47E+08 | 396 | Promoter (1-2kb)    | ENSG00000248686 | 1807  |
| chr4 | 1.47E+08 | 1.47E+08 | 396 | Promoter (2-3kb)    | ENSG00000248686 | 2162  |
| chr4 | 1.47E+08 | 1.47E+08 | 360 | Promoter (2-3kb)    | ENSG00000248686 | 2189  |
| chr4 | 1.47E+08 | 1.47E+08 | 396 | Promoter (2-3kb)    | ENSG00000248686 | 2366  |
| chr4 | 1.47E+08 | 1.47E+08 | 360 | Promoter (2-3kb)    | ENSG00000248686 | 2388  |
| chr4 | 1.47E+08 | 1.47E+08 | 360 | Promoter (2-3kb)    | ENSG00000248809 | 2805  |
| chr4 | 1.53E+08 | 1.53E+08 | 360 | Promoter (1-2kb)    | ENSG00000249818 | 1420  |
| chr4 | 1.53E+08 | 1.53E+08 | 360 | Promoter (<=1kb)    | ENSG00000245954 | 0     |
| chr4 | 1.53E+08 | 1.53E+08 | 360 | Promoter (1-2kb)    | ENSG00000270302 | -1210 |
| chr4 | 1.53E+08 | 1.53E+08 | 360 | Distal Intergenic   | ENSG00000270302 | -3082 |
| chr4 | 1.59E+08 | 1.59E+08 | 360 | Promoter (2-3kb)    | ENSG00000250604 | -2928 |
| chr4 | 1.61E+08 | 1.61E+08 | 396 | Distal Intergenic   | ENSG00000250488 | -4049 |
| chr4 | 1.7E+08  | 1.7E+08  | 360 | Distal Intergenic   | ENSG00000249609 | -3369 |
| chr4 | 1.7E+08  | 1.7E+08  | 360 | Distal Intergenic   | ENSG00000249609 | -3797 |
| chr4 | 1.71E+08 | 1.71E+08 | 396 | Distal Intergenic   | ENSG00000250266 | -4761 |
| chr4 | 1.74E+08 | 1.74E+08 | 360 | Promoter (<=1kb)    | ENSG00000272870 | -736  |
| chr4 | 1.83E+08 | 1.83E+08 | 396 | Promoter (2-3kb)    | ENSG00000177822 | 2855  |
| chr4 | 1.83E+08 | 1.83E+08 | 396 | Promoter (<=1kb)    | ENSG00000177822 | 0     |
| chr4 | 1.84E+08 | 1.84E+08 | 360 | Promoter (2-3kb)    | ENSG00000232648 | -2021 |
| chr4 | 1.85E+08 | 1.85E+08 | 360 | Promoter (2-3kb)    | ENSG00000248206 | 2703  |
| chr4 | 1.85E+08 | 1.85E+08 | 396 | Promoter (<=1kb)    | ENSG00000180712 | 897   |
| chr4 | 1.85E+08 | 1.85E+08 | 396 | Promoter (<=1kb)    | ENSG00000180712 | 360   |
| chr4 | 1.85E+08 | 1.85E+08 | 396 | Promoter (<=1kb)    | ENSG00000271646 | 199   |
| chr4 | 1.85E+08 | 1.85E+08 | 360 | Promoter (<=1kb)    | ENSG00000271646 | 214   |
| chr4 | 1.85E+08 | 1.85E+08 | 360 | Promoter (<=1kb)    | ENSG00000271646 | 754   |
| chr4 | 1.85E+08 | 1.85E+08 | 360 | Promoter (2-3kb)    | ENSG00000271646 | 2402  |
| chr4 | 1.85E+08 | 1.85E+08 | 360 | Promoter (<=1kb)    | ENSG00000271538 | -804  |
| chr4 | 1.86E+08 | 1.86E+08 | 396 | Promoter (2-3kb)    | ENSG00000251230 | 2370  |
| chr4 | 1.86E+08 | 1.86E+08 | 396 | Promoter (2-3kb)    | ENSG00000251230 | 2030  |
| chr4 | 1.86E+08 | 1.86E+08 | 360 | Promoter (2-3kb)    | ENSG00000251230 | 2017  |

|      |          |          |     |                   |                 |       |
|------|----------|----------|-----|-------------------|-----------------|-------|
| chr4 | 1.86E+08 | 1.86E+08 | 360 | Distal Intergenic | ENSG00000248517 | -4403 |
| chr4 | 1.86E+08 | 1.86E+08 | 396 | Distal Intergenic | ENSG00000248517 | -4271 |
| chr4 | 1.86E+08 | 1.86E+08 | 396 | Promoter (2-3kb)  | ENSG00000250754 | 2028  |
| chr4 | 1.87E+08 | 1.87E+08 | 360 | Promoter (1-2kb)  | ENSG00000235149 | 1441  |
| chr4 | 1.87E+08 | 1.87E+08 | 360 | Distal Intergenic | ENSG00000251165 | -3048 |
| chr4 | 1.88E+08 | 1.88E+08 | 360 | Promoter (<=1kb)  | ENSG00000251490 | -296  |
| chr4 | 1.89E+08 | 1.89E+08 | 396 | Promoter (<=1kb)  | ENSG00000249642 | 521   |
| chr4 | 1.9E+08  | 1.9E+08  | 396 | Distal Intergenic | ENSG00000251310 | -4174 |
| chr5 | 271235   | 271630   | 396 | Promoter (<=1kb)  | ENSG00000248925 | 1     |
| chr5 | 271439   | 271798   | 360 | Promoter (<=1kb)  | ENSG00000248925 | 0     |
| chr5 | 271484   | 271879   | 396 | Promoter (<=1kb)  | ENSG00000248925 | 0     |
| chr5 | 471074   | 471433   | 360 | Promoter (1-2kb)  | ENSG00000225138 | -1918 |
| chr5 | 472414   | 472773   | 360 | Promoter (<=1kb)  | ENSG00000225138 | -578  |
| chr5 | 472564   | 472959   | 396 | Promoter (<=1kb)  | ENSG00000225138 | -392  |
| chr5 | 613182   | 613577   | 396 | Promoter (<=1kb)  | ENSG00000249650 | -857  |
| chr5 | 613505   | 613900   | 396 | Promoter (1-2kb)  | ENSG00000249650 | -1180 |
| chr5 | 671392   | 671787   | 396 | Distal Intergenic | ENSG00000271781 | -4154 |
| chr5 | 1178850  | 1179245  | 396 | Promoter (<=1kb)  | ENSG00000249201 | -130  |
| chr5 | 1182546  | 1182941  | 396 | Distal Intergenic | ENSG00000249201 | -3826 |
| chr5 | 1183057  | 1183452  | 396 | Distal Intergenic | ENSG00000249201 | -4337 |
| chr5 | 1183131  | 1183490  | 360 | Distal Intergenic | ENSG00000249201 | -4411 |
| chr5 | 1380292  | 1380687  | 396 | Promoter (<=1kb)  | ENSG00000250584 | -110  |
| chr5 | 1551474  | 1551833  | 360 | Promoter (<=1kb)  | ENSG00000251532 | 0     |
| chr5 | 1552736  | 1553131  | 396 | Promoter (<=1kb)  | ENSG00000251532 | -911  |
| chr5 | 1553052  | 1553411  | 360 | Promoter (1-2kb)  | ENSG00000251532 | -1227 |
| chr5 | 1555321  | 1555716  | 396 | Distal Intergenic | ENSG00000251532 | -3496 |
| chr5 | 1935999  | 1936358  | 360 | Promoter (2-3kb)  | ENSG00000248994 | 2022  |
| chr5 | 5077746  | 5078105  | 360 | Promoter (<=1kb)  | ENSG00000250529 | 319   |
| chr5 | 6768798  | 6769157  | 360 | Promoter (2-3kb)  | ENSG00000251365 | 2794  |
| chr5 | 8457147  | 8457542  | 396 | Promoter (<=1kb)  | ENSG00000247516 | -64   |
| chr5 | 8457430  | 8457789  | 360 | Promoter (<=1kb)  | ENSG00000247516 | 0     |
| chr5 | 8457717  | 8458112  | 396 | Promoter (<=1kb)  | ENSG00000247516 | 0     |
| chr5 | 8457940  | 8458335  | 396 | Promoter (<=1kb)  | ENSG00000247516 | 136   |
| chr5 | 9545107  | 9545502  | 396 | Promoter (<=1kb)  | ENSG00000250786 | -810  |
| chr5 | 10250216 | 10250611 | 396 | Promoter (1-2kb)  | ENSG00000248968 | 1779  |
| chr5 | 10250350 | 10250709 | 360 | Promoter (1-2kb)  | ENSG00000248968 | 1913  |
| chr5 | 10250415 | 10250810 | 396 | Promoter (1-2kb)  | ENSG00000248968 | 1978  |
| chr5 | 10353187 | 10353582 | 396 | Promoter (<=1kb)  | ENSG00000259802 | 131   |
| chr5 | 10353903 | 10354298 | 396 | Promoter (<=1kb)  | ENSG00000259802 | -190  |
| chr5 | 10354142 | 10354501 | 360 | Promoter (<=1kb)  | ENSG00000259802 | -429  |
| chr5 | 10354355 | 10354714 | 360 | Promoter (<=1kb)  | ENSG00000259802 | -642  |
| chr5 | 10354956 | 10355351 | 396 | Promoter (1-2kb)  | ENSG00000259802 | -1243 |
| chr5 | 10441699 | 10442094 | 396 | Promoter (<=1kb)  | ENSG00000250600 | 0     |
| chr5 | 10441899 | 10442294 | 396 | Promoter (<=1kb)  | ENSG00000250600 | 0     |
| chr5 | 10627853 | 10628212 | 360 | Promoter (<=1kb)  | ENSG00000250106 | 125   |
| chr5 | 10759988 | 10760347 | 360 | Promoter (<=1kb)  | ENSG00000272324 | -830  |
| chr5 | 10760426 | 10760785 | 360 | Promoter (<=1kb)  | ENSG00000272324 | -392  |
| chr5 | 10760491 | 10760886 | 396 | Promoter (<=1kb)  | ENSG00000272324 | -291  |
| chr5 | 10762154 | 10762549 | 396 | Promoter (<=1kb)  | ENSG00000272324 | 977   |
| chr5 | 13175521 | 13175880 | 360 | Promoter (<=1kb)  | ENSG00000248145 | -78   |
| chr5 | 14664480 | 14664875 | 396 | Promoter (<=1kb)  | ENSG00000261360 | 0     |
| chr5 | 14872056 | 14872451 | 396 | Promoter (<=1kb)  | ENSG00000272057 | 0     |
| chr5 | 14872616 | 14872975 | 360 | Promoter (<=1kb)  | ENSG00000272057 | 175   |
| chr5 | 14872873 | 14873232 | 360 | Promoter (<=1kb)  | ENSG00000272057 | 432   |
| chr5 | 15604959 | 15605318 | 360 | Promoter (2-3kb)  | ENSG00000250250 | 2040  |
| chr5 | 16128860 | 16129219 | 360 | Promoter (<=1kb)  | ENSG00000250981 | -68   |
| chr5 | 27471105 | 27471464 | 360 | Promoter (<=1kb)  | ENSG00000250337 | -935  |
| chr5 | 27471947 | 27472364 | 418 | Promoter (<=1kb)  | ENSG00000250337 | -35   |

|      |          |          |     |                     |                 |       |
|------|----------|----------|-----|---------------------|-----------------|-------|
| chr5 | 27472003 | 27472341 | 339 | Promoter (<=1kb)    | ENSG00000250337 | -58   |
| chr5 | 27472878 | 27473273 | 396 | Promoter (<=1kb)    | ENSG00000250337 | 464   |
| chr5 | 27476077 | 27476472 | 396 | Promoter (<=1kb)    | ENSG00000250337 | 305   |
| chr5 | 32124352 | 32124747 | 396 | Promoter (2-3kb)    | ENSG00000250764 | -2305 |
| chr5 | 32171638 | 32171997 | 360 | Promoter (2-3kb)    | ENSG00000272086 | -2580 |
| chr5 | 32173290 | 32173685 | 396 | Promoter (<=1kb)    | ENSG00000272086 | -892  |
| chr5 | 32174242 | 32174637 | 396 | Promoter (<=1kb)    | ENSG00000272086 | 0     |
| chr5 | 32174249 | 32174608 | 360 | Promoter (<=1kb)    | ENSG00000272086 | 0     |
| chr5 | 33440387 | 33440746 | 360 | Promoter (<=1kb)    | ENSG00000249572 | 0     |
| chr5 | 33440481 | 33440876 | 396 | Promoter (<=1kb)    | ENSG00000249572 | 0     |
| chr5 | 33441029 | 33441424 | 396 | Promoter (<=1kb)    | ENSG00000249572 | -304  |
| chr5 | 33441102 | 33441461 | 360 | Promoter (<=1kb)    | ENSG00000249572 | -377  |
| chr5 | 34656246 | 34656641 | 396 | Promoter (<=1kb)    | ENSG00000250234 | 714   |
| chr5 | 34656249 | 34656608 | 360 | Promoter (<=1kb)    | ENSG00000250234 | 747   |
| chr5 | 34657538 | 34657933 | 396 | Promoter (<=1kb)    | ENSG00000250234 | -183  |
| chr5 | 34659272 | 34659631 | 360 | Promoter (1-2kb)    | ENSG00000250234 | -1917 |
| chr5 | 34839092 | 34839451 | 360 | Promoter (<=1kb)    | ENSG00000272323 | 0     |
| chr5 | 34839217 | 34839612 | 396 | Promoter (<=1kb)    | ENSG00000272323 | 0     |
| chr5 | 37840321 | 37840716 | 396 | Promoter (<=1kb)    | ENSG00000248587 | 0     |
| chr5 | 37950738 | 37951133 | 396 | Promoter (2-3kb)    | ENSG00000251518 | 2145  |
| chr5 | 38026186 | 38026545 | 360 | Promoter (<=1kb)    | ENSG00000250003 | 387   |
| chr5 | 38144797 | 38145156 | 360 | Intron (ENST000005) | ENSG00000248461 | -3426 |
| chr5 | 38148038 | 38148433 | 396 | Promoter (<=1kb)    | ENSG00000248461 | -149  |
| chr5 | 38148244 | 38148639 | 396 | Promoter (<=1kb)    | ENSG00000248461 | 0     |
| chr5 | 38427168 | 38427563 | 396 | Promoter (<=1kb)    | ENSG00000249491 | 0     |
| chr5 | 38427368 | 38427763 | 396 | Promoter (<=1kb)    | ENSG00000249491 | 0     |
| chr5 | 38467383 | 38467778 | 396 | Promoter (<=1kb)    | ENSG00000251257 | 631   |
| chr5 | 38557381 | 38557740 | 360 | Promoter (<=1kb)    | ENSG00000244968 | 493   |
| chr5 | 38559779 | 38560174 | 396 | Promoter (<=1kb)    | ENSG00000244968 | 735   |
| chr5 | 38784199 | 38784558 | 360 | Promoter (<=1kb)    | ENSG00000250629 | 517   |
| chr5 | 38843914 | 38844309 | 396 | Promoter (1-2kb)    | ENSG00000249740 | 1561  |
| chr5 | 38845240 | 38845599 | 360 | Promoter (<=1kb)    | ENSG00000249740 | 271   |
| chr5 | 38845628 | 38846023 | 396 | Promoter (<=1kb)    | ENSG00000249740 | 0     |
| chr5 | 38846213 | 38846572 | 360 | Promoter (<=1kb)    | ENSG00000249740 | -282  |
| chr5 | 38848172 | 38848567 | 396 | Promoter (2-3kb)    | ENSG00000249740 | -2241 |
| chr5 | 42808512 | 42808907 | 396 | Promoter (2-3kb)    | ENSG00000272234 | 2016  |
| chr5 | 43006731 | 43007090 | 360 | Promoter (<=1kb)    | ENSG00000271788 | 555   |
| chr5 | 43006973 | 43007332 | 360 | Promoter (<=1kb)    | ENSG00000271788 | 313   |
| chr5 | 43007340 | 43007735 | 396 | Promoter (<=1kb)    | ENSG00000271788 | 0     |
| chr5 | 43008550 | 43008945 | 396 | Promoter (<=1kb)    | ENSG00000271788 | -905  |
| chr5 | 43008649 | 43009008 | 360 | Promoter (1-2kb)    | ENSG00000271788 | -1004 |
| chr5 | 43009938 | 43010333 | 396 | Promoter (2-3kb)    | ENSG00000271788 | -2293 |
| chr5 | 43010015 | 43010374 | 360 | Promoter (2-3kb)    | ENSG00000271788 | -2370 |
| chr5 | 43010214 | 43010573 | 360 | Promoter (2-3kb)    | ENSG00000271788 | -2569 |
| chr5 | 43017821 | 43018216 | 396 | Promoter (<=1kb)    | ENSG00000251131 | -315  |
| chr5 | 43017896 | 43018255 | 360 | Promoter (<=1kb)    | ENSG00000251131 | -276  |
| chr5 | 43019460 | 43019855 | 396 | Promoter (<=1kb)    | ENSG00000177738 | -547  |
| chr5 | 43023444 | 43023839 | 396 | Intron (ENST000005) | ENSG00000177738 | -4531 |
| chr5 | 43040167 | 43040562 | 396 | Promoter (1-2kb)    | ENSG00000215068 | -1115 |
| chr5 | 43040276 | 43040635 | 360 | Promoter (1-2kb)    | ENSG00000215068 | -1042 |
| chr5 | 43041265 | 43041660 | 396 | Promoter (<=1kb)    | ENSG00000215068 | -17   |
| chr5 | 43041468 | 43041863 | 396 | Promoter (<=1kb)    | ENSG00000215068 | 0     |
| chr5 | 43042021 | 43042416 | 396 | Promoter (<=1kb)    | ENSG00000215068 | 0     |
| chr5 | 43042218 | 43042577 | 360 | Promoter (<=1kb)    | ENSG00000215068 | 0     |
| chr5 | 43058022 | 43058381 | 360 | Intron (ENST000005) | ENSG00000272144 | -3116 |
| chr5 | 43061452 | 43061811 | 360 | Promoter (<=1kb)    | ENSG00000272144 | 0     |
| chr5 | 43064786 | 43065181 | 396 | Promoter (2-3kb)    | ENSG00000177738 | 2340  |
| chr5 | 43066108 | 43066503 | 396 | Promoter (1-2kb)    | ENSG00000177738 | 1018  |

|      |          |          |     |                     |                 |       |
|------|----------|----------|-----|---------------------|-----------------|-------|
| chr5 | 43066386 | 43066745 | 360 | Promoter (<=1kb)    | ENSG00000177738 | 776   |
| chr5 | 43066584 | 43066979 | 396 | Promoter (<=1kb)    | ENSG00000177738 | 542   |
| chr5 | 43066620 | 43066979 | 360 | Promoter (<=1kb)    | ENSG00000177738 | 542   |
| chr5 | 43066783 | 43067178 | 396 | Promoter (<=1kb)    | ENSG00000177738 | 343   |
| chr5 | 43067024 | 43067383 | 360 | Promoter (<=1kb)    | ENSG00000177738 | 138   |
| chr5 | 43067240 | 43067599 | 360 | Promoter (<=1kb)    | ENSG00000177738 | 0     |
| chr5 | 43285523 | 43285918 | 396 | Promoter (1-2kb)    | ENSG00000261604 | -1785 |
| chr5 | 43286425 | 43286784 | 360 | Promoter (<=1kb)    | ENSG00000261604 | -919  |
| chr5 | 43287072 | 43287431 | 360 | Promoter (<=1kb)    | ENSG00000261604 | -272  |
| chr5 | 43287222 | 43287617 | 396 | Promoter (<=1kb)    | ENSG00000261604 | -86   |
| chr5 | 43288654 | 43289049 | 396 | Promoter (<=1kb)    | ENSG00000261604 | -448  |
| chr5 | 43483289 | 43483648 | 360 | Promoter (<=1kb)    | ENSG00000249492 | -413  |
| chr5 | 43483528 | 43483923 | 396 | Promoter (<=1kb)    | ENSG00000249492 | -138  |
| chr5 | 43484141 | 43484500 | 360 | Promoter (<=1kb)    | ENSG00000249492 | 0     |
| chr5 | 43514905 | 43515264 | 360 | Promoter (<=1kb)    | ENSG00000248240 | -112  |
| chr5 | 43515127 | 43515522 | 396 | Promoter (<=1kb)    | ENSG00000248240 | 0     |
| chr5 | 43515368 | 43515763 | 396 | Promoter (<=1kb)    | ENSG00000248240 | 0     |
| chr5 | 43601787 | 43602182 | 396 | Promoter (<=1kb)    | ENSG00000248092 | 857   |
| chr5 | 43602971 | 43603330 | 360 | Promoter (<=1kb)    | ENSG00000248092 | 0     |
| chr5 | 43603053 | 43603448 | 396 | Promoter (<=1kb)    | ENSG00000248092 | 0     |
| chr5 | 43607125 | 43607520 | 396 | Distal Intergenic   | ENSG00000248092 | -3793 |
| chr5 | 44750838 | 44751233 | 396 | Promoter (1-2kb)    | ENSG00000248779 | -1818 |
| chr5 | 44808875 | 44809270 | 396 | Promoter (<=1kb)    | ENSG00000251141 | 0     |
| chr5 | 44808876 | 44809235 | 360 | Promoter (<=1kb)    | ENSG00000251141 | 0     |
| chr5 | 50745718 | 50746077 | 360 | Promoter (<=1kb)    | ENSG00000251125 | -915  |
| chr5 | 54330525 | 54330920 | 396 | Promoter (<=1kb)    | ENSG00000240535 | -427  |
| chr5 | 54334183 | 54334578 | 396 | Intron (ENST000006) | ENSG00000240535 | -4085 |
| chr5 | 55232831 | 55233226 | 396 | Promoter (<=1kb)    | ENSG00000262211 | 860   |
| chr5 | 55233039 | 55233434 | 396 | Promoter (1-2kb)    | ENSG00000262211 | 1068  |
| chr5 | 56156290 | 56156685 | 396 | Promoter (1-2kb)    | ENSG00000237705 | 1306  |
| chr5 | 56211475 | 56211834 | 360 | Distal Intergenic   | ENSG00000225230 | -4934 |
| chr5 | 56211508 | 56211903 | 396 | Distal Intergenic   | ENSG00000225230 | -4967 |
| chr5 | 56908956 | 56909315 | 360 | Promoter (<=1kb)    | ENSG00000249436 | -901  |
| chr5 | 58116393 | 58116752 | 360 | Distal Intergenic   | ENSG00000248475 | -3467 |
| chr5 | 60163442 | 60163801 | 360 | Promoter (<=1kb)    | ENSG00000272308 | -680  |
| chr5 | 60214868 | 60215263 | 396 | Promoter (1-2kb)    | ENSG00000233847 | 1551  |
| chr5 | 60453249 | 60453644 | 396 | Distal Intergenic   | ENSG00000251279 | -4253 |
| chr5 | 60453476 | 60453871 | 396 | Distal Intergenic   | ENSG00000251279 | -4026 |
| chr5 | 60564034 | 60564393 | 360 | Distal Intergenic   | ENSG00000249279 | -3278 |
| chr5 | 60565281 | 60565676 | 396 | Distal Intergenic   | ENSG00000249279 | -4525 |
| chr5 | 60992981 | 60993340 | 360 | Promoter (<=1kb)    | ENSG00000248529 | 919   |
| chr5 | 60996394 | 60996789 | 396 | Promoter (2-3kb)    | ENSG00000248529 | -2135 |
| chr5 | 65956377 | 65956736 | 360 | Promoter (1-2kb)    | ENSG00000249057 | -1423 |
| chr5 | 66771918 | 66772313 | 396 | Promoter (<=1kb)    | ENSG00000250978 | -498  |
| chr5 | 67094799 | 67095194 | 396 | Promoter (1-2kb)    | ENSG00000249364 | 1626  |
| chr5 | 67094811 | 67095170 | 360 | Promoter (1-2kb)    | ENSG00000249364 | 1638  |
| chr5 | 67095015 | 67095410 | 396 | Promoter (1-2kb)    | ENSG00000249364 | 1842  |
| chr5 | 67095431 | 67095790 | 360 | Promoter (2-3kb)    | ENSG00000249364 | 2258  |
| chr5 | 67814426 | 67814821 | 396 | Distal Intergenic   | ENSG00000249588 | -4884 |
| chr5 | 68257321 | 68257716 | 396 | Promoter (<=1kb)    | ENSG00000249335 | 269   |
| chr5 | 68267407 | 68267766 | 360 | Promoter (<=1kb)    | ENSG00000249352 | -828  |
| chr5 | 68271215 | 68271610 | 396 | Intron (ENST000005) | ENSG00000249352 | -4636 |
| chr5 | 68271453 | 68271848 | 396 | Intron (ENST000005) | ENSG00000249352 | -4874 |
| chr5 | 68430710 | 68431105 | 396 | Promoter (1-2kb)    | ENSG00000248664 | 1116  |
| chr5 | 68433742 | 68434101 | 360 | Promoter (1-2kb)    | ENSG00000248664 | -1521 |
| chr5 | 71659174 | 71659533 | 360 | Promoter (2-3kb)    | ENSG00000272093 | 2657  |
| chr5 | 71953768 | 71954163 | 396 | Promoter (2-3kb)    | ENSG00000248371 | 2333  |
| chr5 | 72631887 | 72632282 | 396 | Promoter (1-2kb)    | ENSG00000251543 | -1451 |

|      |          |          |     |                   |                 |       |
|------|----------|----------|-----|-------------------|-----------------|-------|
| chr5 | 73400906 | 73401265 | 360 | Promoter (1-2kb)  | ENSG00000248474 | -1865 |
| chr5 | 73403419 | 73403814 | 396 | Distal Intergenic | ENSG00000248474 | -4378 |
| chr5 | 73602079 | 73602474 | 396 | Promoter (1-2kb)  | ENSG00000248942 | 1676  |
| chr5 | 73630205 | 73630600 | 396 | Promoter (<=1kb)  | ENSG00000250446 | 0     |
| chr5 | 74637315 | 74637674 | 360 | Distal Intergenic | ENSG00000247372 | -4576 |
| chr5 | 74637522 | 74637881 | 360 | Distal Intergenic | ENSG00000247372 | -4783 |
| chr5 | 74903186 | 74903581 | 396 | Promoter (1-2kb)  | ENSG00000272040 | -1061 |
| chr5 | 74903430 | 74903825 | 396 | Promoter (<=1kb)  | ENSG00000272040 | -817  |
| chr5 | 75605210 | 75605605 | 396 | Promoter (1-2kb)  | ENSG00000250348 | 1682  |
| chr5 | 75611687 | 75612046 | 360 | Distal Intergenic | ENSG00000250348 | -4400 |
| chr5 | 75907199 | 75907558 | 360 | Promoter (2-3kb)  | ENSG00000249713 | -2404 |
| chr5 | 76371811 | 76372206 | 396 | Promoter (2-3kb)  | ENSG00000250615 | 2105  |
| chr5 | 76372435 | 76372830 | 396 | Promoter (2-3kb)  | ENSG00000250615 | 2729  |
| chr5 | 76385712 | 76386107 | 396 | Promoter (1-2kb)  | ENSG00000250802 | 1510  |
| chr5 | 76414778 | 76415173 | 396 | Promoter (<=1kb)  | ENSG00000250802 | 631   |
| chr5 | 77241116 | 77241475 | 360 | Promoter (<=1kb)  | ENSG00000253572 | 787   |
| chr5 | 77241376 | 77241735 | 360 | Promoter (<=1kb)  | ENSG00000253572 | 527   |
| chr5 | 79234099 | 79234494 | 396 | Promoter (1-2kb)  | ENSG00000250888 | 1697  |
| chr5 | 79234372 | 79234767 | 396 | Promoter (1-2kb)  | ENSG00000250888 | 1970  |
| chr5 | 79234663 | 79235058 | 396 | Promoter (2-3kb)  | ENSG00000250888 | 2261  |
| chr5 | 79425995 | 79426354 | 360 | Promoter (1-2kb)  | ENSG00000251675 | 1811  |
| chr5 | 79928609 | 79928968 | 360 | Promoter (1-2kb)  | ENSG00000249655 | -1200 |
| chr5 | 80247737 | 80248132 | 396 | Promoter (<=1kb)  | ENSG00000251450 | 667   |
| chr5 | 80247947 | 80248342 | 396 | Promoter (<=1kb)  | ENSG00000251450 | 457   |
| chr5 | 80254726 | 80255121 | 396 | Promoter (1-2kb)  | ENSG00000251450 | 1605  |
| chr5 | 80255265 | 80255660 | 396 | Promoter (1-2kb)  | ENSG00000251450 | 1066  |
| chr5 | 80255532 | 80255927 | 396 | Promoter (<=1kb)  | ENSG00000251450 | 799   |
| chr5 | 80255658 | 80256017 | 360 | Promoter (<=1kb)  | ENSG00000251450 | 709   |
| chr5 | 80256137 | 80256532 | 396 | Promoter (<=1kb)  | ENSG00000251450 | 194   |
| chr5 | 80407952 | 80408311 | 360 | Promoter (2-3kb)  | ENSG00000249772 | 2360  |
| chr5 | 80408180 | 80408575 | 396 | Promoter (2-3kb)  | ENSG00000249772 | 2096  |
| chr5 | 80408201 | 80408560 | 360 | Promoter (2-3kb)  | ENSG00000249772 | 2111  |
| chr5 | 80408394 | 80408789 | 396 | Promoter (1-2kb)  | ENSG00000249772 | 1882  |
| chr5 | 81285750 | 81286109 | 360 | Promoter (1-2kb)  | ENSG00000236447 | -1705 |
| chr5 | 81371459 | 81371854 | 396 | Promoter (1-2kb)  | ENSG00000248192 | -1938 |
| chr5 | 82220809 | 82221168 | 360 | Distal Intergenic | ENSG00000248112 | -3871 |
| chr5 | 88235715 | 88236074 | 360 | Promoter (2-3kb)  | ENSG00000248309 | -2830 |
| chr5 | 91381261 | 91381620 | 360 | Promoter (2-3kb)  | ENSG00000250049 | 2847  |
| chr5 | 92906951 | 92907346 | 396 | Promoter (<=1kb)  | ENSG00000237187 | 0     |
| chr5 | 92907152 | 92907547 | 396 | Promoter (<=1kb)  | ENSG00000237187 | -103  |
| chr5 | 92909865 | 92910260 | 396 | Promoter (2-3kb)  | ENSG00000237187 | -2816 |
| chr5 | 92924160 | 92924555 | 396 | Promoter (2-3kb)  | ENSG00000237187 | -2806 |
| chr5 | 93078527 | 93078886 | 360 | Promoter (1-2kb)  | ENSG00000272406 | 1181  |
| chr5 | 93078544 | 93078939 | 396 | Promoter (1-2kb)  | ENSG00000272406 | 1198  |
| chr5 | 95922178 | 95922537 | 360 | Promoter (1-2kb)  | ENSG00000251314 | 1981  |
| chr5 | 95922880 | 95923275 | 396 | Promoter (2-3kb)  | ENSG00000251314 | 2683  |
| chr5 | 96076368 | 96076727 | 360 | Promoter (1-2kb)  | ENSG00000249180 | 1675  |
| chr5 | 96078537 | 96078932 | 396 | Promoter (<=1kb)  | ENSG00000249180 | -135  |
| chr5 | 96117859 | 96118254 | 396 | Promoter (2-3kb)  | ENSG00000248734 | -2227 |
| chr5 | 96118095 | 96118454 | 360 | Promoter (2-3kb)  | ENSG00000248734 | -2027 |
| chr5 | 96118145 | 96118540 | 396 | Promoter (1-2kb)  | ENSG00000248734 | -1941 |
| chr5 | 96123562 | 96123957 | 396 | Promoter (2-3kb)  | ENSG00000248734 | 2898  |
| chr5 | 96141097 | 96141492 | 396 | Promoter (<=1kb)  | ENSG00000272109 | 0     |
| chr5 | 1.02E+08 | 1.02E+08 | 396 | Distal Intergenic | ENSG00000249017 | -4883 |
| chr5 | 1.07E+08 | 1.07E+08 | 396 | Distal Intergenic | ENSG00000249959 | -3463 |
| chr5 | 1.09E+08 | 1.09E+08 | 396 | Promoter (2-3kb)  | ENSG00000249476 | 2292  |
| chr5 | 1.09E+08 | 1.09E+08 | 360 | Distal Intergenic | ENSG00000271849 | -3083 |
| chr5 | 1.1E+08  | 1.1E+08  | 360 | Promoter (2-3kb)  | ENSG00000248428 | -2183 |

|      |          |          |     |                    |                 |       |
|------|----------|----------|-----|--------------------|-----------------|-------|
| chr5 | 1.1E+08  | 1.1E+08  | 396 | Promoter (2-3kb)   | ENSG00000248428 | -2260 |
| chr5 | 1.11E+08 | 1.11E+08 | 165 | Promoter (1-2kb)   | ENSG00000224032 | -1361 |
| chr5 | 1.11E+08 | 1.11E+08 | 111 | Promoter (1-2kb)   | ENSG00000224032 | -1406 |
| chr5 | 1.12E+08 | 1.12E+08 | 396 | Promoter (1-2kb)   | ENSG00000251076 | -1713 |
| chr5 | 1.15E+08 | 1.15E+08 | 396 | Promoter (2-3kb)   | ENSG00000249791 | -2712 |
| chr5 | 1.15E+08 | 1.15E+08 | 396 | Distal Intergenic  | ENSG00000249021 | -4941 |
| chr5 | 1.16E+08 | 1.16E+08 | 396 | Distal Intergenic  | ENSG00000250949 | -3912 |
| chr5 | 1.25E+08 | 1.25E+08 | 360 | Distal Intergenic  | ENSG00000248631 | -4044 |
| chr5 | 1.27E+08 | 1.27E+08 | 360 | Promoter (1-2kb)   | ENSG00000230561 | -1949 |
| chr5 | 1.27E+08 | 1.27E+08 | 396 | Promoter (2-3kb)   | ENSG00000230561 | 2497  |
| chr5 | 1.27E+08 | 1.27E+08 | 396 | Intron (ENST000005 | ENSG00000250603 | -4262 |
| chr5 | 1.27E+08 | 1.27E+08 | 396 | Intron (ENST000005 | ENSG00000250603 | -4473 |
| chr5 | 1.32E+08 | 1.32E+08 | 360 | Promoter (1-2kb)   | ENSG00000224015 | 1168  |
| chr5 | 1.32E+08 | 1.32E+08 | 360 | Intron (ENST000004 | ENSG00000223442 | -3472 |
| chr5 | 1.32E+08 | 1.32E+08 | 360 | Promoter (<=1kb)   | ENSG00000223442 | 689   |
| chr5 | 1.32E+08 | 1.32E+08 | 396 | Promoter (1-2kb)   | ENSG00000223442 | -1846 |
| chr5 | 1.32E+08 | 1.32E+08 | 360 | Promoter (1-2kb)   | ENSG00000223442 | -1906 |
| chr5 | 1.32E+08 | 1.32E+08 | 360 | Distal Intergenic  | ENSG00000223442 | -3266 |
| chr5 | 1.32E+08 | 1.32E+08 | 360 | Distal Intergenic  | ENSG00000223442 | -3865 |
| chr5 | 1.32E+08 | 1.32E+08 | 396 | Promoter (2-3kb)   | ENSG00000272203 | -2528 |
| chr5 | 1.32E+08 | 1.32E+08 | 360 | Distal Intergenic  | ENSG00000272023 | -4820 |
| chr5 | 1.32E+08 | 1.32E+08 | 360 | Distal Intergenic  | ENSG00000272023 | -4619 |
| chr5 | 1.32E+08 | 1.32E+08 | 396 | Distal Intergenic  | ENSG00000248245 | -4552 |
| chr5 | 1.32E+08 | 1.32E+08 | 360 | Promoter (1-2kb)   | ENSG00000248245 | -1730 |
| chr5 | 1.32E+08 | 1.32E+08 | 396 | Promoter (<=1kb)   | ENSG00000248245 | 800   |
| chr5 | 1.33E+08 | 1.33E+08 | 360 | Promoter (1-2kb)   | ENSG00000248245 | 1803  |
| chr5 | 1.33E+08 | 1.33E+08 | 360 | Promoter (<=1kb)   | ENSG00000250244 | 435   |
| chr5 | 1.33E+08 | 1.33E+08 | 360 | Distal Intergenic  | ENSG00000249073 | -4957 |
| chr5 | 1.33E+08 | 1.33E+08 | 360 | Promoter (2-3kb)   | ENSG00000249073 | 2239  |
| chr5 | 1.34E+08 | 1.34E+08 | 396 | Promoter (<=1kb)   | ENSG00000248482 | 967   |
| chr5 | 1.34E+08 | 1.34E+08 | 396 | Promoter (<=1kb)   | ENSG00000248482 | 695   |
| chr5 | 1.34E+08 | 1.34E+08 | 360 | Promoter (<=1kb)   | ENSG00000248482 | 720   |
| chr5 | 1.34E+08 | 1.34E+08 | 396 | Promoter (<=1kb)   | ENSG00000248482 | 0     |
| chr5 | 1.35E+08 | 1.35E+08 | 396 | Promoter (<=1kb)   | ENSG00000251045 | 567   |
| chr5 | 1.35E+08 | 1.35E+08 | 360 | Promoter (<=1kb)   | ENSG00000250378 | -969  |
| chr5 | 1.35E+08 | 1.35E+08 | 396 | Promoter (1-2kb)   | ENSG00000253927 | -1621 |
| chr5 | 1.35E+08 | 1.35E+08 | 396 | Promoter (1-2kb)   | ENSG00000253927 | -1821 |
| chr5 | 1.37E+08 | 1.37E+08 | 360 | Promoter (1-2kb)   | ENSG00000270237 | -1449 |
| chr5 | 1.37E+08 | 1.37E+08 | 360 | Promoter (1-2kb)   | ENSG00000270237 | -1685 |
| chr5 | 1.38E+08 | 1.38E+08 | 396 | Promoter (2-3kb)   | ENSG00000249593 | 2257  |
| chr5 | 1.38E+08 | 1.38E+08 | 396 | Promoter (2-3kb)   | ENSG00000249593 | 2484  |
| chr5 | 1.4E+08  | 1.4E+08  | 360 | Promoter (<=1kb)   | ENSG00000254363 | 456   |
| chr5 | 1.4E+08  | 1.4E+08  | 360 | Promoter (1-2kb)   | ENSG00000254363 | 1873  |
| chr5 | 1.4E+08  | 1.4E+08  | 360 | Distal Intergenic  | ENSG00000250069 | -3294 |
| chr5 | 1.4E+08  | 1.4E+08  | 396 | Promoter (2-3kb)   | ENSG00000253965 | 2913  |
| chr5 | 1.4E+08  | 1.4E+08  | 396 | Promoter (2-3kb)   | ENSG00000253965 | 2320  |
| chr5 | 1.4E+08  | 1.4E+08  | 360 | Promoter (1-2kb)   | ENSG00000253965 | -1710 |
| chr5 | 1.4E+08  | 1.4E+08  | 396 | Promoter (1-2kb)   | ENSG00000253965 | -1768 |
| chr5 | 1.4E+08  | 1.4E+08  | 360 | Promoter (1-2kb)   | ENSG00000253965 | -1944 |
| chr5 | 1.41E+08 | 1.41E+08 | 360 | Distal Intergenic  | ENSG00000272070 | -5000 |
| chr5 | 1.41E+08 | 1.41E+08 | 360 | Distal Intergenic  | ENSG00000272070 | -3881 |
| chr5 | 1.41E+08 | 1.41E+08 | 360 | Distal Intergenic  | ENSG00000272070 | -3657 |
| chr5 | 1.41E+08 | 1.41E+08 | 396 | Promoter (1-2kb)   | ENSG00000272070 | 1599  |
| chr5 | 1.41E+08 | 1.41E+08 | 360 | Distal Intergenic  | ENSG00000271871 | -4987 |
| chr5 | 1.41E+08 | 1.41E+08 | 360 | Promoter (1-2kb)   | ENSG00000254099 | 1600  |
| chr5 | 1.42E+08 | 1.42E+08 | 396 | Promoter (1-2kb)   | ENSG00000231185 | 1756  |
| chr5 | 1.42E+08 | 1.42E+08 | 360 | Promoter (1-2kb)   | ENSG00000231185 | 1775  |
| chr5 | 1.42E+08 | 1.42E+08 | 396 | Promoter (2-3kb)   | ENSG00000261757 | -2707 |

|      |          |          |     |                      |                 |       |
|------|----------|----------|-----|----------------------|-----------------|-------|
| chr5 | 1.42E+08 | 1.42E+08 | 360 | Promoter (1-2kb)     | ENSG00000236714 | 1462  |
| chr5 | 1.43E+08 | 1.43E+08 | 360 | Distal Intergenic    | ENSG00000251205 | -3115 |
| chr5 | 1.43E+08 | 1.43E+08 | 396 | Promoter (2-3kb)     | ENSG00000249881 | -2098 |
| chr5 | 1.46E+08 | 1.46E+08 | 396 | Distal Intergenic    | ENSG00000250407 | -4451 |
| chr5 | 1.46E+08 | 1.46E+08 | 360 | Promoter (2-3kb)     | ENSG00000249553 | -2643 |
| chr5 | 1.48E+08 | 1.48E+08 | 360 | Promoter (<=1kb)     | ENSG00000250072 | 207   |
| chr5 | 1.5E+08  | 1.5E+08  | 360 | Distal Intergenic    | ENSG00000253852 | -4813 |
| chr5 | 1.51E+08 | 1.51E+08 | 396 | Distal Intergenic    | ENSG00000254298 | -4825 |
| chr5 | 1.51E+08 | 1.51E+08 | 360 | Distal Intergenic    | ENSG00000254298 | -4857 |
| chr5 | 1.51E+08 | 1.51E+08 | 360 | Promoter (<=1kb)     | ENSG00000249035 | 0     |
| chr5 | 1.51E+08 | 1.51E+08 | 360 | Promoter (<=1kb)     | ENSG00000249035 | 0     |
| chr5 | 1.51E+08 | 1.51E+08 | 396 | Promoter (1-2kb)     | ENSG00000272112 | 1732  |
| chr5 | 1.52E+08 | 1.52E+08 | 360 | Intron (ENST000005:) | ENSG00000254226 | -3366 |
| chr5 | 1.52E+08 | 1.52E+08 | 360 | Intron (ENST000005:) | ENSG00000254226 | -3159 |
| chr5 | 1.57E+08 | 1.57E+08 | 360 | Distal Intergenic    | ENSG00000253653 | -4737 |
| chr5 | 1.57E+08 | 1.57E+08 | 396 | Promoter (<=1kb)     | ENSG00000248544 | 0     |
| chr5 | 1.58E+08 | 1.58E+08 | 396 | Promoter (<=1kb)     | ENSG00000253449 | 947   |
| chr5 | 1.6E+08  | 1.6E+08  | 396 | Promoter (1-2kb)     | ENSG00000247699 | -1798 |
| chr5 | 1.6E+08  | 1.6E+08  | 360 | Promoter (1-2kb)     | ENSG00000254391 | 1899  |
| chr5 | 1.64E+08 | 1.64E+08 | 396 | Promoter (1-2kb)     | ENSG00000253331 | -1312 |
| chr5 | 1.64E+08 | 1.64E+08 | 396 | Promoter (2-3kb)     | ENSG00000241956 | 2927  |
| chr5 | 1.67E+08 | 1.67E+08 | 360 | Promoter (<=1kb)     | ENSG00000253947 | 265   |
| chr5 | 1.72E+08 | 1.72E+08 | 360 | Promoter (1-2kb)     | ENSG00000253445 | 1148  |
| chr5 | 1.72E+08 | 1.72E+08 | 396 | Promoter (1-2kb)     | ENSG00000253295 | -1971 |
| chr5 | 1.72E+08 | 1.72E+08 | 360 | Promoter (2-3kb)     | ENSG00000253295 | 2087  |
| chr5 | 1.72E+08 | 1.72E+08 | 396 | Promoter (1-2kb)     | ENSG00000253736 | -1921 |
| chr5 | 1.72E+08 | 1.72E+08 | 396 | Promoter (1-2kb)     | ENSG00000253736 | -1052 |
| chr5 | 1.72E+08 | 1.72E+08 | 360 | Promoter (<=1kb)     | ENSG00000253736 | -955  |
| chr5 | 1.72E+08 | 1.72E+08 | 396 | Promoter (1-2kb)     | ENSG00000253628 | -1693 |
| chr5 | 1.72E+08 | 1.72E+08 | 360 | Promoter (<=1kb)     | ENSG00000254295 | 439   |
| chr5 | 1.72E+08 | 1.72E+08 | 360 | Promoter (<=1kb)     | ENSG00000254295 | 638   |
| chr5 | 1.73E+08 | 1.73E+08 | 360 | Promoter (1-2kb)     | ENSG00000253968 | 1252  |
| chr5 | 1.73E+08 | 1.73E+08 | 396 | Distal Intergenic    | ENSG00000253141 | -4603 |
| chr5 | 1.73E+08 | 1.73E+08 | 396 | Distal Intergenic    | ENSG00000253141 | -3247 |
| chr5 | 1.73E+08 | 1.73E+08 | 396 | Promoter (2-3kb)     | ENSG00000253686 | 2835  |
| chr5 | 1.73E+08 | 1.73E+08 | 396 | Promoter (1-2kb)     | ENSG00000253686 | 1973  |
| chr5 | 1.73E+08 | 1.73E+08 | 396 | Intron (ENST000005:) | ENSG00000253686 | -3328 |
| chr5 | 1.74E+08 | 1.74E+08 | 396 | Promoter (2-3kb)     | ENSG00000249306 | 2930  |
| chr5 | 1.74E+08 | 1.74E+08 | 360 | Intron (ENST000005:) | ENSG00000249306 | -4618 |
| chr5 | 1.74E+08 | 1.74E+08 | 396 | Intron (ENST000005:) | ENSG00000249306 | -4572 |
| chr5 | 1.74E+08 | 1.74E+08 | 360 | Promoter (1-2kb)     | ENSG00000249306 | -1477 |
| chr5 | 1.74E+08 | 1.74E+08 | 396 | Promoter (<=1kb)     | ENSG00000249306 | 0     |
| chr5 | 1.74E+08 | 1.74E+08 | 396 | Promoter (<=1kb)     | ENSG00000249306 | 69    |
| chr5 | 1.74E+08 | 1.74E+08 | 396 | Promoter (1-2kb)     | ENSG00000249306 | 1994  |
| chr5 | 1.74E+08 | 1.74E+08 | 360 | Promoter (2-3kb)     | ENSG00000249306 | 2004  |
| chr5 | 1.74E+08 | 1.74E+08 | 396 | Promoter (2-3kb)     | ENSG00000249306 | 2799  |
| chr5 | 1.74E+08 | 1.74E+08 | 396 | Intron (ENST000005:) | ENSG00000249306 | -3067 |
| chr5 | 1.74E+08 | 1.74E+08 | 396 | Promoter (2-3kb)     | ENSG00000249306 | -2855 |
| chr5 | 1.74E+08 | 1.74E+08 | 360 | Promoter (2-3kb)     | ENSG00000249306 | -2229 |
| chr5 | 1.74E+08 | 1.74E+08 | 360 | Promoter (<=1kb)     | ENSG00000250256 | 290   |
| chr5 | 1.74E+08 | 1.74E+08 | 396 | Promoter (<=1kb)     | ENSG00000250256 | 323   |
| chr5 | 1.77E+08 | 1.77E+08 | 360 | Promoter (2-3kb)     | ENSG00000249849 | -2917 |
| chr5 | 1.77E+08 | 1.77E+08 | 396 | Promoter (2-3kb)     | ENSG00000249849 | -2857 |
| chr5 | 1.77E+08 | 1.77E+08 | 360 | Promoter (2-3kb)     | ENSG00000248943 | -2476 |
| chr5 | 1.77E+08 | 1.77E+08 | 396 | Distal Intergenic    | ENSG00000249186 | -3208 |
| chr5 | 1.77E+08 | 1.77E+08 | 396 | Promoter (<=1kb)     | ENSG00000250101 | 0     |
| chr5 | 1.77E+08 | 1.77E+08 | 396 | Promoter (<=1kb)     | ENSG00000250101 | 0     |
| chr5 | 1.77E+08 | 1.77E+08 | 396 | Promoter (<=1kb)     | ENSG00000249684 | 102   |

|      |          |          |     |                     |                 |       |
|------|----------|----------|-----|---------------------|-----------------|-------|
| chr5 | 1.77E+08 | 1.77E+08 | 396 | Promoter (<=1kb)    | ENSG00000249684 | 311   |
| chr5 | 1.8E+08  | 1.8E+08  | 360 | Promoter (1-2kb)    | ENSG00000248367 | -1996 |
| chr5 | 1.81E+08 | 1.81E+08 | 396 | Promoter (<=1kb)    | ENSG00000250900 | 629   |
| chr5 | 1.81E+08 | 1.81E+08 | 396 | Distal Intergenic   | ENSG00000233937 | -3269 |
| chr6 | 960433   | 960828   | 396 | Promoter (1-2kb)    | ENSG00000229796 | 1683  |
| chr6 | 1025170  | 1025565  | 396 | Promoter (1-2kb)    | ENSG00000270937 | 1895  |
| chr6 | 2241913  | 2242308  | 396 | Distal Intergenic   | ENSG00000250903 | -3674 |
| chr6 | 2245047  | 2245442  | 396 | Promoter (<=1kb)    | ENSG00000250903 | -540  |
| chr6 | 2245987  | 2246382  | 396 | Promoter (<=1kb)    | ENSG00000250903 | 0     |
| chr6 | 2246189  | 2246584  | 396 | Promoter (<=1kb)    | ENSG00000250903 | 100   |
| chr6 | 2303896  | 2304291  | 396 | Promoter (2-3kb)    | ENSG00000250903 | -2236 |
| chr6 | 2433739  | 2434098  | 360 | Intron (ENST000006) | ENSG00000272465 | -3685 |
| chr6 | 2634506  | 2634865  | 360 | Promoter (2-3kb)    | ENSG00000228718 | -2305 |
| chr6 | 2875391  | 2875786  | 396 | Promoter (<=1kb)    | ENSG00000230438 | 958   |
| chr6 | 2875672  | 2876067  | 396 | Promoter (<=1kb)    | ENSG00000230438 | 677   |
| chr6 | 2876538  | 2876933  | 396 | Promoter (<=1kb)    | ENSG00000230438 | 0     |
| chr6 | 2877119  | 2877514  | 396 | Promoter (<=1kb)    | ENSG00000230438 | -375  |
| chr6 | 2877460  | 2877855  | 396 | Promoter (<=1kb)    | ENSG00000230438 | -716  |
| chr6 | 2912153  | 2912512  | 360 | Distal Intergenic   | ENSG00000228365 | -4616 |
| chr6 | 2982879  | 2983274  | 396 | Distal Intergenic   | ENSG00000244041 | -4927 |
| chr6 | 2988491  | 2988886  | 396 | Promoter (<=1kb)    | ENSG00000244041 | 0     |
| chr6 | 2988508  | 2988867  | 360 | Promoter (<=1kb)    | ENSG00000244041 | -15   |
| chr6 | 2988715  | 2989110  | 396 | Promoter (<=1kb)    | ENSG00000244041 | 0     |
| chr6 | 2991054  | 2991449  | 396 | Promoter (2-3kb)    | ENSG00000244041 | 2121  |
| chr6 | 2999114  | 2999509  | 396 | Promoter (<=1kb)    | ENSG00000224846 | 0     |
| chr6 | 2999228  | 2999587  | 360 | Promoter (<=1kb)    | ENSG00000224846 | 0     |
| chr6 | 2999791  | 3000186  | 396 | Promoter (<=1kb)    | ENSG00000224846 | -423  |
| chr6 | 3001778  | 3002173  | 396 | Promoter (2-3kb)    | ENSG00000224846 | -2410 |
| chr6 | 3001983  | 3002378  | 396 | Promoter (2-3kb)    | ENSG00000224846 | -2615 |
| chr6 | 3025751  | 3026146  | 396 | Promoter (<=1kb)    | ENSG00000261015 | 726   |
| chr6 | 3026067  | 3026462  | 396 | Promoter (1-2kb)    | ENSG00000261015 | 1042  |
| chr6 | 3053655  | 3054014  | 360 | Promoter (2-3kb)    | ENSG00000229282 | -2110 |
| chr6 | 3053672  | 3054067  | 396 | Promoter (2-3kb)    | ENSG00000229282 | -2057 |
| chr6 | 3053856  | 3054215  | 360 | Promoter (1-2kb)    | ENSG00000229282 | -1909 |
| chr6 | 3067667  | 3068062  | 396 | Promoter (1-2kb)    | ENSG00000272277 | 1066  |
| chr6 | 3068517  | 3068876  | 360 | Promoter (<=1kb)    | ENSG00000272277 | 252   |
| chr6 | 3068610  | 3069005  | 396 | Promoter (<=1kb)    | ENSG00000272277 | 123   |
| chr6 | 3068774  | 3069133  | 360 | Promoter (<=1kb)    | ENSG00000272277 | 0     |
| chr6 | 3069557  | 3069916  | 360 | Promoter (<=1kb)    | ENSG00000272277 | -429  |
| chr6 | 3074112  | 3074471  | 360 | Distal Intergenic   | ENSG00000272277 | -4984 |
| chr6 | 3151959  | 3152354  | 396 | Promoter (<=1kb)    | ENSG00000228170 | 942   |
| chr6 | 3151991  | 3152350  | 360 | Promoter (<=1kb)    | ENSG00000228170 | 946   |
| chr6 | 3155415  | 3155810  | 396 | Promoter (2-3kb)    | ENSG00000228170 | -2119 |
| chr6 | 3157488  | 3157883  | 396 | Distal Intergenic   | ENSG00000228170 | -4192 |
| chr6 | 3157530  | 3157889  | 360 | Distal Intergenic   | ENSG00000228170 | -4234 |
| chr6 | 3157729  | 3158088  | 360 | Distal Intergenic   | ENSG00000228170 | -4433 |
| chr6 | 3195539  | 3195934  | 396 | Promoter (<=1kb)    | ENSG00000230269 | 47    |
| chr6 | 3310546  | 3310905  | 360 | Promoter (<=1kb)    | ENSG00000272320 | -991  |
| chr6 | 3748322  | 3748717  | 396 | Promoter (2-3kb)    | ENSG00000270504 | -2628 |
| chr6 | 3748771  | 3749166  | 396 | Promoter (2-3kb)    | ENSG00000270504 | -2179 |
| chr6 | 3749723  | 3750118  | 396 | Promoter (1-2kb)    | ENSG00000270504 | -1227 |
| chr6 | 3749938  | 3750333  | 396 | Promoter (1-2kb)    | ENSG00000270504 | -1012 |
| chr6 | 3828282  | 3828641  | 360 | Distal Intergenic   | ENSG00000238158 | -3526 |
| chr6 | 3829247  | 3829606  | 360 | Promoter (2-3kb)    | ENSG00000238158 | -2561 |
| chr6 | 3833671  | 3834066  | 396 | Promoter (1-2kb)    | ENSG00000238158 | 1504  |
| chr6 | 3891230  | 3891589  | 360 | Promoter (1-2kb)    | ENSG00000233068 | -1771 |
| chr6 | 3910144  | 3910539  | 396 | Promoter (1-2kb)    | ENSG00000260604 | 1674  |
| chr6 | 3911376  | 3911735  | 360 | Promoter (<=1kb)    | ENSG00000260604 | 478   |



|      |          |          |     |                   |                 |       |
|------|----------|----------|-----|-------------------|-----------------|-------|
| chr6 | 3912508  | 3912867  | 360 | Promoter (<=1kb)  | ENSG00000260604 | -295  |
| chr6 | 3913604  | 3913999  | 396 | Promoter (1-2kb)  | ENSG00000260604 | -1391 |
| chr6 | 4016453  | 4016848  | 396 | Promoter (2-3kb)  | ENSG00000272248 | -2099 |
| chr6 | 4017044  | 4017439  | 396 | Promoter (1-2kb)  | ENSG00000272248 | -1508 |
| chr6 | 4018297  | 4018656  | 360 | Promoter (<=1kb)  | ENSG00000272248 | -291  |
| chr6 | 4018477  | 4018872  | 396 | Promoter (<=1kb)  | ENSG00000272248 | -75   |
| chr6 | 4018498  | 4018857  | 360 | Promoter (<=1kb)  | ENSG00000272248 | -90   |
| chr6 | 4018714  | 4019109  | 396 | Promoter (<=1kb)  | ENSG00000272248 | 0     |
| chr6 | 4019498  | 4019893  | 396 | Promoter (<=1kb)  | ENSG00000272248 | 551   |
| chr6 | 4019750  | 4020145  | 396 | Promoter (<=1kb)  | ENSG00000272248 | 803   |
| chr6 | 4021208  | 4021603  | 396 | Promoter (<=1kb)  | ENSG00000230648 | 0     |
| chr6 | 4021233  | 4021592  | 360 | Promoter (<=1kb)  | ENSG00000230648 | 0     |
| chr6 | 4022202  | 4022561  | 360 | Promoter (<=1kb)  | ENSG00000230648 | -753  |
| chr6 | 4022755  | 4023150  | 396 | Promoter (1-2kb)  | ENSG00000230648 | -1306 |
| chr6 | 4130303  | 4130698  | 396 | Distal Intergenic | ENSG00000254821 | -4959 |
| chr6 | 4130599  | 4130994  | 396 | Distal Intergenic | ENSG00000254821 | -4663 |
| chr6 | 4131712  | 4132107  | 396 | Distal Intergenic | ENSG00000254821 | -3550 |
| chr6 | 4134163  | 4134522  | 360 | Promoter (1-2kb)  | ENSG00000254821 | -1135 |
| chr6 | 4134203  | 4134598  | 396 | Promoter (1-2kb)  | ENSG00000254821 | -1059 |
| chr6 | 4134853  | 4135212  | 360 | Promoter (<=1kb)  | ENSG00000254821 | -445  |
| chr6 | 4135100  | 4135495  | 396 | Promoter (<=1kb)  | ENSG00000254821 | -162  |
| chr6 | 4135106  | 4135465  | 360 | Promoter (<=1kb)  | ENSG00000254821 | -192  |
| chr6 | 4136029  | 4136424  | 396 | Promoter (<=1kb)  | ENSG00000234817 | 0     |
| chr6 | 4136254  | 4136613  | 360 | Promoter (<=1kb)  | ENSG00000234817 | 0     |
| chr6 | 4136299  | 4136694  | 396 | Promoter (<=1kb)  | ENSG00000234817 | 0     |
| chr6 | 4487218  | 4487613  | 396 | Distal Intergenic | ENSG00000260239 | -4428 |
| chr6 | 4490520  | 4490879  | 360 | Promoter (1-2kb)  | ENSG00000260239 | -1162 |
| chr6 | 4607466  | 4607861  | 396 | Distal Intergenic | ENSG00000205444 | -3029 |
| chr6 | 4610006  | 4610365  | 360 | Promoter (<=1kb)  | ENSG00000205444 | -525  |
| chr6 | 4775132  | 4775491  | 360 | Promoter (<=1kb)  | ENSG00000236336 | 151   |
| chr6 | 4775206  | 4775601  | 396 | Promoter (<=1kb)  | ENSG00000236336 | 41    |
| chr6 | 4777705  | 4778064  | 360 | Promoter (2-3kb)  | ENSG00000236336 | -2063 |
| chr6 | 4779238  | 4779633  | 396 | Distal Intergenic | ENSG00000236336 | -3596 |
| chr6 | 5026932  | 5027327  | 396 | Promoter (2-3kb)  | ENSG00000272142 | -2879 |
| chr6 | 5057320  | 5057679  | 360 | Promoter (2-3kb)  | ENSG00000271978 | -2663 |
| chr6 | 5058303  | 5058662  | 360 | Distal Intergenic | ENSG00000271978 | -3646 |
| chr6 | 6683926  | 6684321  | 396 | Promoter (<=1kb)  | ENSG00000261211 | -60   |
| chr6 | 6684042  | 6684401  | 360 | Promoter (<=1kb)  | ENSG00000261211 | -176  |
| chr6 | 6684262  | 6684621  | 360 | Promoter (<=1kb)  | ENSG00000261211 | -396  |
| chr6 | 6686178  | 6686573  | 396 | Promoter (2-3kb)  | ENSG00000261211 | -2312 |
| chr6 | 6686905  | 6687300  | 396 | Distal Intergenic | ENSG00000261211 | -3039 |
| chr6 | 6918191  | 6918550  | 360 | Promoter (<=1kb)  | ENSG00000223342 | 398   |
| chr6 | 7275571  | 7275930  | 360 | Promoter (<=1kb)  | ENSG00000238221 | -334  |
| chr6 | 7276070  | 7276465  | 396 | Promoter (<=1kb)  | ENSG00000238221 | 0     |
| chr6 | 7541148  | 7541507  | 360 | Promoter (<=1kb)  | ENSG00000261189 | 64    |
| chr6 | 7541544  | 7541939  | 396 | Promoter (<=1kb)  | ENSG00000261189 | 0     |
| chr6 | 7543042  | 7543401  | 360 | Promoter (1-2kb)  | ENSG00000261189 | -1471 |
| chr6 | 7543977  | 7544336  | 360 | Promoter (2-3kb)  | ENSG00000261189 | -2406 |
| chr6 | 8341303  | 8341662  | 360 | Promoter (1-2kb)  | ENSG00000234763 | 1592  |
| chr6 | 10425919 | 10426314 | 396 | Promoter (<=1kb)  | ENSG00000228478 | 95    |
| chr6 | 10433089 | 10433448 | 360 | Promoter (1-2kb)  | ENSG00000229401 | -1101 |
| chr6 | 10434834 | 10435193 | 360 | Promoter (<=1kb)  | ENSG00000183674 | 0     |
| chr6 | 10475914 | 10476309 | 396 | Promoter (2-3kb)  | ENSG00000231056 | 2426  |
| chr6 | 10747155 | 10747514 | 360 | Promoter (<=1kb)  | ENSG00000272097 | 288   |
| chr6 | 10747305 | 10747700 | 396 | Promoter (<=1kb)  | ENSG00000272097 | 102   |
| chr6 | 10747359 | 10747718 | 360 | Promoter (<=1kb)  | ENSG00000272097 | 84    |
| chr6 | 10747904 | 10748299 | 396 | Promoter (<=1kb)  | ENSG00000272097 | -8    |
| chr6 | 10749268 | 10749663 | 396 | Promoter (1-2kb)  | ENSG00000272097 | -1372 |

|      |          |          |     |                      |                 |       |
|------|----------|----------|-----|----------------------|-----------------|-------|
| chr6 | 11039294 | 11039689 | 396 | Distal Intergenic    | ENSG00000230314 | -4068 |
| chr6 | 11043697 | 11044092 | 396 | Promoter (<=1kb)     | ENSG00000230314 | 0     |
| chr6 | 11044004 | 11044399 | 396 | Promoter (<=1kb)     | ENSG00000230314 | 11    |
| chr6 | 11172442 | 11172837 | 396 | Promoter (<=1kb)     | ENSG00000247925 | -848  |
| chr6 | 11172617 | 11172976 | 360 | Promoter (<=1kb)     | ENSG00000247925 | -709  |
| chr6 | 11172695 | 11173090 | 396 | Promoter (<=1kb)     | ENSG00000247925 | -595  |
| chr6 | 11172914 | 11173273 | 360 | Promoter (<=1kb)     | ENSG00000247925 | -412  |
| chr6 | 11172932 | 11173327 | 396 | Promoter (<=1kb)     | ENSG00000247925 | -358  |
| chr6 | 11420242 | 11420637 | 396 | Promoter (2-3kb)     | ENSG00000233656 | 2659  |
| chr6 | 11420259 | 11420618 | 360 | Promoter (2-3kb)     | ENSG00000233656 | 2676  |
| chr6 | 11990168 | 11990563 | 396 | Promoter (1-2kb)     | ENSG00000225102 | 1682  |
| chr6 | 12006280 | 12006675 | 396 | Promoter (1-2kb)     | ENSG00000229896 | -1228 |
| chr6 | 12008458 | 12008853 | 396 | Promoter (<=1kb)     | ENSG00000229896 | 355   |
| chr6 | 12008493 | 12008852 | 360 | Promoter (<=1kb)     | ENSG00000229896 | 390   |
| chr6 | 12008892 | 12009251 | 360 | Promoter (<=1kb)     | ENSG00000229896 | 789   |
| chr6 | 12010199 | 12010594 | 396 | Promoter (2-3kb)     | ENSG00000229896 | 2096  |
| chr6 | 12010352 | 12010711 | 360 | Promoter (2-3kb)     | ENSG00000229896 | 2249  |
| chr6 | 12010629 | 12011024 | 396 | Promoter (2-3kb)     | ENSG00000229896 | 2526  |
| chr6 | 13283533 | 13283928 | 396 | Promoter (<=1kb)     | ENSG00000215022 | 0     |
| chr6 | 13285204 | 13285599 | 396 | Promoter (1-2kb)     | ENSG00000215022 | -1531 |
| chr6 | 13289401 | 13289760 | 360 | Promoter (<=1kb)     | ENSG00000272379 | 962   |
| chr6 | 13290198 | 13290593 | 396 | Promoter (<=1kb)     | ENSG00000272379 | 129   |
| chr6 | 13484178 | 13484537 | 360 | Promoter (1-2kb)     | ENSG00000237786 | -1989 |
| chr6 | 13484200 | 13484595 | 396 | Promoter (1-2kb)     | ENSG00000237786 | -1931 |
| chr6 | 13614604 | 13614963 | 360 | Promoter (<=1kb)     | ENSG00000261071 | 424   |
| chr6 | 13614853 | 13615248 | 396 | Promoter (<=1kb)     | ENSG00000261071 | 139   |
| chr6 | 13615065 | 13615460 | 396 | Promoter (<=1kb)     | ENSG00000261071 | 0     |
| chr6 | 13615196 | 13615555 | 360 | Promoter (<=1kb)     | ENSG00000261071 | 0     |
| chr6 | 13615332 | 13615727 | 396 | Promoter (<=1kb)     | ENSG00000261071 | 0     |
| chr6 | 13616029 | 13616388 | 360 | Promoter (<=1kb)     | ENSG00000261071 | -642  |
| chr6 | 13617142 | 13617537 | 396 | Promoter (1-2kb)     | ENSG00000261071 | -1755 |
| chr6 | 13617349 | 13617744 | 396 | Promoter (1-2kb)     | ENSG00000261071 | -1962 |
| chr6 | 13828512 | 13828871 | 360 | Promoter (2-3kb)     | ENSG00000272209 | 2849  |
| chr6 | 15243474 | 15243833 | 360 | Promoter (1-2kb)     | ENSG00000271888 | 1398  |
| chr6 | 15244262 | 15244657 | 396 | Promoter (<=1kb)     | ENSG00000271888 | 574   |
| chr6 | 15245643 | 15246038 | 396 | Promoter (<=1kb)     | ENSG00000271888 | -412  |
| chr6 | 15245779 | 15246138 | 360 | Promoter (<=1kb)     | ENSG00000271888 | -548  |
| chr6 | 15247273 | 15247668 | 396 | Promoter (1-2kb)     | ENSG00000235488 | 1197  |
| chr6 | 15247478 | 15247873 | 396 | Promoter (<=1kb)     | ENSG00000235488 | 992   |
| chr6 | 15249749 | 15250144 | 396 | Promoter (<=1kb)     | ENSG00000235488 | -884  |
| chr6 | 16757297 | 16757656 | 360 | Distal Intergenic    | ENSG00000229931 | -3713 |
| chr6 | 16759237 | 16759596 | 360 | Promoter (1-2kb)     | ENSG00000229931 | -1773 |
| chr6 | 16760316 | 16760711 | 396 | Promoter (<=1kb)     | ENSG00000229931 | -658  |
| chr6 | 16760506 | 16760865 | 360 | Promoter (<=1kb)     | ENSG00000229931 | -504  |
| chr6 | 16760544 | 16760939 | 396 | Promoter (<=1kb)     | ENSG00000229931 | -430  |
| chr6 | 16762324 | 16762719 | 396 | Promoter (<=1kb)     | ENSG00000229931 | 181   |
| chr6 | 16762392 | 16762751 | 360 | Promoter (<=1kb)     | ENSG00000229931 | 249   |
| chr6 | 16762535 | 16762930 | 396 | Promoter (<=1kb)     | ENSG00000229931 | 392   |
| chr6 | 16763005 | 16763400 | 396 | Promoter (<=1kb)     | ENSG00000229931 | 862   |
| chr6 | 17706610 | 17707005 | 396 | Promoter (<=1kb)     | ENSG00000272269 | 122   |
| chr6 | 17706763 | 17707122 | 360 | Promoter (<=1kb)     | ENSG00000272269 | 275   |
| chr6 | 17706831 | 17707226 | 396 | Promoter (<=1kb)     | ENSG00000272269 | 343   |
| chr6 | 17707836 | 17708231 | 396 | Promoter (1-2kb)     | ENSG00000272269 | 1348  |
| chr6 | 19736068 | 19736463 | 396 | Promoter (1-2kb)     | ENSG00000227116 | -1270 |
| chr6 | 19804562 | 19804957 | 396 | Promoter (<=1kb)     | ENSG00000228412 | 0     |
| chr6 | 19804587 | 19804946 | 360 | Promoter (<=1kb)     | ENSG00000228412 | 0     |
| chr6 | 19804762 | 19805157 | 396 | Promoter (<=1kb)     | ENSG00000228412 | 0     |
| chr6 | 19808381 | 19808740 | 360 | Intron (ENST000004:) | ENSG00000228412 | -3398 |

|      |          |          |     |                   |                 |       |
|------|----------|----------|-----|-------------------|-----------------|-------|
| chr6 | 19838196 | 19838591 | 396 | Promoter (<=1kb)  | ENSG00000226786 | 720   |
| chr6 | 19839051 | 19839446 | 396 | Promoter (<=1kb)  | ENSG00000226786 | 0     |
| chr6 | 19839254 | 19839649 | 396 | Promoter (<=1kb)  | ENSG00000226786 | 0     |
| chr6 | 21352454 | 21352849 | 396 | Promoter (2-3kb)  | ENSG00000227089 | 2678  |
| chr6 | 22148156 | 22148551 | 396 | Promoter (<=1kb)  | ENSG00000272168 | 719   |
| chr6 | 24703410 | 24703805 | 396 | Promoter (1-2kb)  | ENSG00000272345 | -1389 |
| chr6 | 24704062 | 24704457 | 396 | Promoter (2-3kb)  | ENSG00000272345 | -2041 |
| chr6 | 24708709 | 24709104 | 396 | Promoter (1-2kb)  | ENSG00000272402 | 1734  |
| chr6 | 24741252 | 24741647 | 396 | Promoter (<=1kb)  | ENSG00000224164 | -883  |
| chr6 | 24744585 | 24744980 | 396 | Promoter (2-3kb)  | ENSG00000224164 | 2055  |
| chr6 | 24750005 | 24750364 | 360 | Promoter (<=1kb)  | ENSG00000224164 | 710   |
| chr6 | 25991826 | 25992221 | 396 | Promoter (<=1kb)  | ENSG00000272462 | -669  |
| chr6 | 25992216 | 25992575 | 360 | Promoter (<=1kb)  | ENSG00000272462 | -315  |
| chr6 | 25992466 | 25992861 | 396 | Promoter (<=1kb)  | ENSG00000272462 | -29   |
| chr6 | 25992513 | 25992872 | 360 | Promoter (<=1kb)  | ENSG00000272462 | -18   |
| chr6 | 25993499 | 25993894 | 396 | Promoter (<=1kb)  | ENSG00000272462 | 609   |
| chr6 | 26518410 | 26518769 | 360 | Distal Intergenic | ENSG00000228223 | -3307 |
| chr6 | 26518475 | 26518870 | 396 | Distal Intergenic | ENSG00000228223 | -3206 |
| chr6 | 26519501 | 26519860 | 360 | Promoter (2-3kb)  | ENSG00000228223 | -2216 |
| chr6 | 26520485 | 26520844 | 360 | Promoter (1-2kb)  | ENSG00000228223 | -1232 |
| chr6 | 26521124 | 26521483 | 360 | Promoter (<=1kb)  | ENSG00000228223 | -593  |
| chr6 | 26521129 | 26521524 | 396 | Promoter (<=1kb)  | ENSG00000228223 | -552  |
| chr6 | 26523091 | 26523486 | 396 | Promoter (1-2kb)  | ENSG00000228223 | 1015  |
| chr6 | 26639033 | 26639392 | 360 | Promoter (2-3kb)  | ENSG00000233631 | -2025 |
| chr6 | 27091523 | 27091882 | 360 | Promoter (<=1kb)  | ENSG00000272468 | -523  |
| chr6 | 27372887 | 27373282 | 396 | Promoter (1-2kb)  | ENSG00000271755 | 1461  |
| chr6 | 28102377 | 28102736 | 360 | Promoter (1-2kb)  | ENSG00000261839 | -1891 |
| chr6 | 28104376 | 28104771 | 396 | Promoter (<=1kb)  | ENSG00000261839 | 0     |
| chr6 | 28104598 | 28104993 | 396 | Promoter (<=1kb)  | ENSG00000261839 | 0     |
| chr6 | 28105671 | 28106066 | 396 | Promoter (<=1kb)  | ENSG00000269293 | -600  |
| chr6 | 28105895 | 28106290 | 396 | Promoter (<=1kb)  | ENSG00000269293 | -824  |
| chr6 | 28553806 | 28554201 | 396 | Promoter (<=1kb)  | ENSG00000246350 | -954  |
| chr6 | 28555805 | 28556200 | 396 | Promoter (<=1kb)  | ENSG00000246350 | 650   |
| chr6 | 28807708 | 28808103 | 396 | Promoter (<=1kb)  | ENSG00000225173 | -925  |
| chr6 | 28807794 | 28808153 | 360 | Promoter (1-2kb)  | ENSG00000225173 | -1011 |
| chr6 | 28811763 | 28812122 | 360 | Distal Intergenic | ENSG00000225173 | -4980 |
| chr6 | 28836851 | 28837246 | 396 | Distal Intergenic | ENSG00000225595 | -4444 |
| chr6 | 28860831 | 28861190 | 360 | Distal Intergenic | ENSG00000224157 | -3117 |
| chr6 | 28861050 | 28861409 | 360 | Promoter (2-3kb)  | ENSG00000224157 | -2898 |
| chr6 | 28863576 | 28863935 | 360 | Promoter (<=1kb)  | ENSG00000224157 | -372  |
| chr6 | 28863676 | 28864071 | 396 | Promoter (<=1kb)  | ENSG00000224157 | -236  |
| chr6 | 28863784 | 28864143 | 360 | Promoter (<=1kb)  | ENSG00000224157 | -164  |
| chr6 | 28863880 | 28864275 | 396 | Promoter (<=1kb)  | ENSG00000224157 | -32   |
| chr6 | 28864022 | 28864381 | 360 | Promoter (<=1kb)  | ENSG00000224157 | 0     |
| chr6 | 28865484 | 28865879 | 396 | Promoter (1-2kb)  | ENSG00000224157 | 1177  |
| chr6 | 28865997 | 28866356 | 360 | Promoter (1-2kb)  | ENSG00000224157 | 1690  |
| chr6 | 28866507 | 28866866 | 360 | Promoter (2-3kb)  | ENSG00000224157 | 2200  |
| chr6 | 28948794 | 28949189 | 396 | Distal Intergenic | ENSG00000227214 | -4791 |
| chr6 | 28951842 | 28952201 | 360 | Promoter (1-2kb)  | ENSG00000227214 | -1779 |
| chr6 | 28953052 | 28953447 | 396 | Promoter (<=1kb)  | ENSG00000227214 | -533  |
| chr6 | 28953145 | 28953504 | 360 | Promoter (<=1kb)  | ENSG00000227214 | -476  |
| chr6 | 28954285 | 28954644 | 360 | Promoter (<=1kb)  | ENSG00000244349 | 0     |
| chr6 | 29465352 | 29465711 | 360 | Promoter (<=1kb)  | ENSG00000229274 | 66    |
| chr6 | 29704195 | 29704590 | 396 | Promoter (1-2kb)  | ENSG00000214922 | 1631  |
| chr6 | 29942404 | 29942763 | 360 | Promoter (<=1kb)  | ENSG00000204625 | -126  |
| chr6 | 29942636 | 29942995 | 360 | Promoter (<=1kb)  | ENSG00000204625 | 0     |
| chr6 | 29946359 | 29946754 | 396 | Promoter (1-2kb)  | ENSG00000204625 | 1115  |
| chr6 | 30003047 | 30003406 | 360 | Promoter (<=1kb)  | ENSG00000204623 | -255  |

|      |          |          |     |                                      |                 |       |
|------|----------|----------|-----|--------------------------------------|-----------------|-------|
| chr6 | 30005509 | 30005904 | 396 | Promoter (2-3kb)                     | ENSG00000204623 | -2717 |
| chr6 | 30006530 | 30006925 | 396 | Intron (ENST000004: ENSG00000204623) | ENSG00000204623 | -3738 |
| chr6 | 30075203 | 30075598 | 396 | Promoter (2-3kb)                     | ENSG00000231226 | 2186  |
| chr6 | 30075327 | 30075686 | 360 | Promoter (2-3kb)                     | ENSG00000231226 | 2310  |
| chr6 | 30200905 | 30201300 | 396 | Promoter (<=1kb)                     | ENSG00000270604 | 954   |
| chr6 | 30205556 | 30205951 | 396 | Intron (ENST000004: ENSG00000270604) | ENSG00000270604 | -3302 |
| chr6 | 30206254 | 30206649 | 396 | Intron (ENST000004: ENSG00000270604) | ENSG00000270604 | -4000 |
| chr6 | 30206751 | 30207146 | 396 | Intron (ENST000004: ENSG00000270604) | ENSG00000270604 | -4497 |
| chr6 | 30207205 | 30207600 | 396 | Intron (ENST000004: ENSG00000270604) | ENSG00000270604 | -4951 |
| chr6 | 30666299 | 30666694 | 396 | Distal Intergenic                    | ENSG00000224328 | -4150 |
| chr6 | 30667253 | 30667612 | 360 | Distal Intergenic                    | ENSG00000224328 | -3232 |
| chr6 | 30671090 | 30671449 | 360 | Promoter (<=1kb)                     | ENSG00000224328 | 246   |
| chr6 | 30671352 | 30671711 | 360 | Promoter (<=1kb)                     | ENSG00000224328 | 508   |
| chr6 | 30671570 | 30671929 | 360 | Promoter (<=1kb)                     | ENSG00000224328 | 726   |
| chr6 | 30672895 | 30673254 | 360 | Promoter (2-3kb)                     | ENSG00000224328 | 2051  |
| chr6 | 30673134 | 30673493 | 360 | Promoter (2-3kb)                     | ENSG00000224328 | 2290  |
| chr6 | 30673555 | 30673914 | 360 | Promoter (2-3kb)                     | ENSG00000224328 | 2711  |
| chr6 | 30690383 | 30690778 | 396 | Promoter (<=1kb)                     | ENSG00000272540 | 876   |
| chr6 | 30690386 | 30690745 | 360 | Promoter (<=1kb)                     | ENSG00000272540 | 909   |
| chr6 | 30690617 | 30690976 | 360 | Promoter (<=1kb)                     | ENSG00000272540 | 678   |
| chr6 | 30690656 | 30691051 | 396 | Promoter (<=1kb)                     | ENSG00000272540 | 603   |
| chr6 | 30690895 | 30691290 | 396 | Promoter (<=1kb)                     | ENSG00000272540 | 364   |
| chr6 | 30691065 | 30691424 | 360 | Promoter (<=1kb)                     | ENSG00000272540 | 230   |
| chr6 | 30695868 | 30696227 | 360 | Distal Intergenic                    | ENSG00000272540 | -4214 |
| chr6 | 30710214 | 30710573 | 360 | Promoter (<=1kb)                     | ENSG00000272273 | -133  |
| chr6 | 30729322 | 30729681 | 360 | Distal Intergenic                    | ENSG00000228022 | -4921 |
| chr6 | 30744572 | 30744931 | 360 | Intron (ENST000004: ENSG00000228022) | ENSG00000228022 | -4804 |
| chr6 | 30744821 | 30745180 | 360 | Intron (ENST000004: ENSG00000228022) | ENSG00000228022 | -4555 |
| chr6 | 30747132 | 30747527 | 396 | Promoter (2-3kb)                     | ENSG00000228022 | -2208 |
| chr6 | 30747354 | 30747749 | 396 | Promoter (1-2kb)                     | ENSG00000228022 | -1986 |
| chr6 | 30749111 | 30749470 | 360 | Promoter (<=1kb)                     | ENSG00000228022 | -265  |
| chr6 | 30749320 | 30749679 | 360 | Promoter (<=1kb)                     | ENSG00000228022 | -56   |
| chr6 | 30795194 | 30795589 | 396 | Promoter (2-3kb)                     | ENSG00000214894 | 2847  |
| chr6 | 30799293 | 30799652 | 360 | Promoter (<=1kb)                     | ENSG00000214894 | -857  |
| chr6 | 30799323 | 30799718 | 396 | Promoter (<=1kb)                     | ENSG00000214894 | -887  |
| chr6 | 30799544 | 30799903 | 360 | Promoter (1-2kb)                     | ENSG00000214894 | -1108 |
| chr6 | 30800717 | 30801076 | 360 | Promoter (2-3kb)                     | ENSG00000214894 | -2281 |
| chr6 | 30815139 | 30815534 | 396 | Promoter (<=1kb)                     | ENSG00000237923 | 402   |
| chr6 | 30815210 | 30815569 | 360 | Promoter (<=1kb)                     | ENSG00000237923 | 367   |
| chr6 | 30815445 | 30815804 | 360 | Promoter (<=1kb)                     | ENSG00000237923 | 132   |
| chr6 | 31144567 | 31144926 | 360 | Promoter (<=1kb)                     | ENSG00000204528 | 750   |
| chr6 | 31144846 | 31145205 | 360 | Promoter (<=1kb)                     | ENSG00000204528 | 471   |
| chr6 | 31366492 | 31366851 | 360 | Promoter (1-2kb)                     | ENSG00000206337 | -1628 |
| chr6 | 31620774 | 31621169 | 396 | Distal Intergenic                    | ENSG00000227198 | -4937 |
| chr6 | 31621493 | 31621888 | 396 | Distal Intergenic                    | ENSG00000227198 | -4218 |
| chr6 | 31621539 | 31621898 | 360 | Distal Intergenic                    | ENSG00000227198 | -4208 |
| chr6 | 31621753 | 31622112 | 360 | Distal Intergenic                    | ENSG00000227198 | -3994 |
| chr6 | 31731397 | 31731756 | 360 | Promoter (1-2kb)                     | ENSG00000235663 | 1609  |
| chr6 | 31732794 | 31733189 | 396 | Promoter (<=1kb)                     | ENSG00000235663 | 176   |
| chr6 | 31734731 | 31735090 | 360 | Promoter (1-2kb)                     | ENSG00000235663 | -1366 |
| chr6 | 31735467 | 31735862 | 396 | Promoter (2-3kb)                     | ENSG00000235663 | -2102 |
| chr6 | 31736354 | 31736713 | 360 | Promoter (2-3kb)                     | ENSG00000235663 | -2989 |
| chr6 | 31736591 | 31736986 | 396 | Distal Intergenic                    | ENSG00000235663 | -3226 |
| chr6 | 31736801 | 31737196 | 396 | Distal Intergenic                    | ENSG00000235663 | -3436 |
| chr6 | 31737361 | 31737756 | 396 | Distal Intergenic                    | ENSG00000235663 | -3996 |
| chr6 | 31737618 | 31738013 | 396 | Distal Intergenic                    | ENSG00000235663 | -4253 |
| chr6 | 31848491 | 31848886 | 396 | Promoter (2-3kb)                     | ENSG00000237080 | -2652 |
| chr6 | 31848701 | 31849096 | 396 | Promoter (2-3kb)                     | ENSG00000237080 | -2442 |

|      |          |          |     |                    |                 |       |
|------|----------|----------|-----|--------------------|-----------------|-------|
| chr6 | 31970910 | 31971305 | 396 | Promoter (<=1kb)   | ENSG00000233627 | 0     |
| chr6 | 31971151 | 31971546 | 396 | Promoter (<=1kb)   | ENSG00000233627 | 0     |
| chr6 | 31972117 | 31972476 | 360 | Promoter (<=1kb)   | ENSG00000233627 | -819  |
| chr6 | 31972233 | 31972628 | 396 | Promoter (<=1kb)   | ENSG00000233627 | -935  |
| chr6 | 31972319 | 31972678 | 360 | Promoter (1-2kb)   | ENSG00000233627 | -1021 |
| chr6 | 31972473 | 31972868 | 396 | Promoter (1-2kb)   | ENSG00000233627 | -1175 |
| chr6 | 32004846 | 32005241 | 396 | Promoter (<=1kb)   | ENSG00000229776 | -811  |
| chr6 | 32152887 | 32153282 | 396 | Promoter (<=1kb)   | ENSG00000273333 | 377   |
| chr6 | 32153676 | 32154071 | 396 | Promoter (<=1kb)   | ENSG00000273333 | -17   |
| chr6 | 32933451 | 32933810 | 360 | Distal Intergenic  | ENSG00000223837 | -4199 |
| chr6 | 32934238 | 32934597 | 360 | Distal Intergenic  | ENSG00000223837 | -3412 |
| chr6 | 34248939 | 34249334 | 396 | Promoter (<=1kb)   | ENSG00000225339 | 210   |
| chr6 | 34661660 | 34662055 | 396 | Promoter (2-3kb)   | ENSG00000272288 | -2039 |
| chr6 | 34662597 | 34662992 | 396 | Promoter (1-2kb)   | ENSG00000272288 | -1102 |
| chr6 | 34662897 | 34663256 | 360 | Promoter (<=1kb)   | ENSG00000272288 | -838  |
| chr6 | 34665549 | 34665944 | 396 | Promoter (<=1kb)   | ENSG00000272288 | 827   |
| chr6 | 34666394 | 34666753 | 360 | Promoter (1-2kb)   | ENSG00000272288 | 1672  |
| chr6 | 34667591 | 34667986 | 396 | Promoter (2-3kb)   | ENSG00000272288 | 2869  |
| chr6 | 34667634 | 34667993 | 360 | Promoter (2-3kb)   | ENSG00000272288 | 2912  |
| chr6 | 36162647 | 36163042 | 396 | Promoter (1-2kb)   | ENSG00000246982 | 1938  |
| chr6 | 36169256 | 36169651 | 396 | Distal Intergenic  | ENSG00000246982 | -4274 |
| chr6 | 37785039 | 37785434 | 396 | Promoter (1-2kb)   | ENSG00000225945 | 1560  |
| chr6 | 37787437 | 37787796 | 360 | Promoter (<=1kb)   | ENSG00000225945 | -443  |
| chr6 | 37791156 | 37791515 | 360 | Distal Intergenic  | ENSG00000225945 | -4162 |
| chr6 | 40467675 | 40468070 | 396 | Promoter (2-3kb)   | ENSG00000236075 | 2062  |
| chr6 | 41480919 | 41481314 | 396 | Intron (ENST000004 | ENSG00000226917 | -4797 |
| chr6 | 41485447 | 41485842 | 396 | Promoter (<=1kb)   | ENSG00000226917 | -269  |
| chr6 | 41487267 | 41487626 | 360 | Promoter (1-2kb)   | ENSG00000226917 | 1156  |
| chr6 | 41512044 | 41512439 | 396 | Promoter (1-2kb)   | ENSG00000234753 | 1373  |
| chr6 | 41512268 | 41512663 | 396 | Promoter (1-2kb)   | ENSG00000234753 | 1149  |
| chr6 | 41519756 | 41520115 | 360 | Distal Intergenic  | ENSG00000234753 | -3397 |
| chr6 | 41520379 | 41520738 | 360 | Distal Intergenic  | ENSG00000234753 | -4020 |
| chr6 | 41735527 | 41735922 | 396 | Distal Intergenic  | ENSG00000269387 | -3329 |
| chr6 | 41755821 | 41756180 | 360 | Promoter (2-3kb)   | ENSG00000268745 | -2968 |
| chr6 | 41755839 | 41756234 | 396 | Promoter (2-3kb)   | ENSG00000268745 | -2914 |
| chr6 | 41997399 | 41997758 | 360 | Promoter (<=1kb)   | ENSG00000223946 | -33   |
| chr6 | 42910850 | 42911245 | 396 | Promoter (<=1kb)   | ENSG00000231113 | -233  |
| chr6 | 42911417 | 42911776 | 360 | Promoter (<=1kb)   | ENSG00000231113 | 0     |
| chr6 | 42911632 | 42912027 | 396 | Promoter (<=1kb)   | ENSG00000231113 | 154   |
| chr6 | 43191672 | 43192031 | 360 | Promoter (<=1kb)   | ENSG00000245261 | -74   |
| chr6 | 43488194 | 43488553 | 360 | Promoter (<=1kb)   | ENSG00000271754 | -732  |
| chr6 | 43488394 | 43488753 | 360 | Promoter (<=1kb)   | ENSG00000271754 | -932  |
| chr6 | 43488439 | 43488834 | 396 | Promoter (<=1kb)   | ENSG00000271754 | -977  |
| chr6 | 43489103 | 43489498 | 396 | Promoter (1-2kb)   | ENSG00000271754 | -1641 |
| chr6 | 43490577 | 43490936 | 360 | Distal Intergenic  | ENSG00000271754 | -3115 |
| chr6 | 43490603 | 43490998 | 396 | Distal Intergenic  | ENSG00000271754 | -3141 |
| chr6 | 43490777 | 43491136 | 360 | Distal Intergenic  | ENSG00000271754 | -3315 |
| chr6 | 43491775 | 43492170 | 396 | Distal Intergenic  | ENSG00000271754 | -4313 |
| chr6 | 43528635 | 43529030 | 396 | Promoter (<=1kb)   | ENSG00000271970 | -579  |
| chr6 | 43528905 | 43529300 | 396 | Promoter (<=1kb)   | ENSG00000271970 | -309  |
| chr6 | 43529125 | 43529520 | 396 | Promoter (<=1kb)   | ENSG00000271970 | -89   |
| chr6 | 43558455 | 43558850 | 396 | Promoter (<=1kb)   | ENSG00000203362 | 249   |
| chr6 | 43704922 | 43705317 | 396 | Promoter (<=1kb)   | ENSG00000236961 | 254   |
| chr6 | 43737167 | 43737526 | 360 | Promoter (<=1kb)   | ENSG00000272114 | 827   |
| chr6 | 43737392 | 43737751 | 360 | Promoter (<=1kb)   | ENSG00000272114 | 602   |
| chr6 | 43819802 | 43820161 | 360 | Promoter (<=1kb)   | ENSG00000223469 | 0     |
| chr6 | 43823324 | 43823683 | 360 | Distal Intergenic  | ENSG00000223469 | -3254 |
| chr6 | 43824453 | 43824848 | 396 | Distal Intergenic  | ENSG00000223469 | -4383 |

|      |          |          |     |                   |                 |       |
|------|----------|----------|-----|-------------------|-----------------|-------|
| chr6 | 43970797 | 43971156 | 360 | Promoter (<=1kb)  | ENSG00000237686 | 230   |
| chr6 | 43973289 | 43973648 | 360 | Promoter (1-2kb)  | ENSG00000237686 | -1903 |
| chr6 | 44487781 | 44488140 | 360 | Distal Intergenic | ENSG00000237530 | -4856 |
| chr6 | 46652193 | 46652588 | 396 | Promoter (2-3kb)  | ENSG00000242973 | 2949  |
| chr6 | 46652210 | 46652569 | 360 | Promoter (2-3kb)  | ENSG00000242973 | 2968  |
| chr6 | 46652933 | 46653292 | 360 | Promoter (2-3kb)  | ENSG00000242973 | 2245  |
| chr6 | 52993924 | 52994283 | 360 | Promoter (2-3kb)  | ENSG00000261745 | -2980 |
| chr6 | 52994138 | 52994497 | 360 | Distal Intergenic | ENSG00000261745 | -3194 |
| chr6 | 52995439 | 52995834 | 396 | Distal Intergenic | ENSG00000261745 | -4495 |
| chr6 | 52995510 | 52995869 | 360 | Distal Intergenic | ENSG00000261745 | -4566 |
| chr6 | 52995728 | 52996123 | 396 | Distal Intergenic | ENSG00000261745 | -4784 |
| chr6 | 53362970 | 53363329 | 360 | Distal Intergenic | ENSG00000249379 | -4654 |
| chr6 | 53614119 | 53614514 | 396 | Promoter (2-3kb)  | ENSG00000227885 | -2299 |
| chr6 | 53615619 | 53616014 | 396 | Distal Intergenic | ENSG00000227885 | -3799 |
| chr6 | 53792907 | 53793266 | 360 | Promoter (1-2kb)  | ENSG00000236740 | -1554 |
| chr6 | 53793020 | 53793415 | 396 | Promoter (1-2kb)  | ENSG00000236740 | -1405 |
| chr6 | 53794061 | 53794456 | 396 | Promoter (<=1kb)  | ENSG00000236740 | -364  |
| chr6 | 53794310 | 53794669 | 360 | Promoter (<=1kb)  | ENSG00000236740 | -151  |
| chr6 | 53794321 | 53794716 | 396 | Promoter (<=1kb)  | ENSG00000236740 | -104  |
| chr6 | 53794594 | 53794953 | 360 | Promoter (<=1kb)  | ENSG00000236740 | 0     |
| chr6 | 53794668 | 53795063 | 396 | Promoter (<=1kb)  | ENSG00000236740 | 0     |
| chr6 | 53795031 | 53795390 | 360 | Promoter (<=1kb)  | ENSG00000236740 | 187   |
| chr6 | 53796016 | 53796375 | 360 | Promoter (1-2kb)  | ENSG00000236740 | 1172  |
| chr6 | 53859475 | 53859834 | 360 | Exon (ENST0000051 | ENSG00000236996 | -3854 |
| chr6 | 53912651 | 53913046 | 396 | Promoter (<=1kb)  | ENSG00000235050 | -259  |
| chr6 | 53913840 | 53914199 | 360 | Promoter (1-2kb)  | ENSG00000235050 | -1448 |
| chr6 | 53914620 | 53914979 | 360 | Promoter (2-3kb)  | ENSG00000235050 | -2228 |
| chr6 | 53943824 | 53944219 | 396 | Promoter (<=1kb)  | ENSG00000235050 | 305   |
| chr6 | 53944128 | 53944523 | 396 | Promoter (<=1kb)  | ENSG00000235050 | 1     |
| chr6 | 54235979 | 54236374 | 396 | Promoter (1-2kb)  | ENSG00000228231 | -1210 |
| chr6 | 57041796 | 57042155 | 360 | Promoter (2-3kb)  | ENSG00000226803 | -2762 |
| chr6 | 64511517 | 64511912 | 396 | Distal Intergenic | ENSG00000236345 | -4817 |
| chr6 | 81149407 | 81149766 | 360 | Distal Intergenic | ENSG00000233967 | -3295 |
| chr6 | 82246972 | 82247367 | 396 | Promoter (2-3kb)  | ENSG00000226089 | -2340 |
| chr6 | 82247498 | 82247857 | 360 | Promoter (2-3kb)  | ENSG00000226089 | -2866 |
| chr6 | 82248454 | 82248849 | 396 | Distal Intergenic | ENSG00000226089 | -3822 |
| chr6 | 82248685 | 82249080 | 396 | Distal Intergenic | ENSG00000226089 | -4053 |
| chr6 | 85400353 | 85400712 | 360 | Promoter (1-2kb)  | ENSG00000228290 | 1130  |
| chr6 | 85403689 | 85404048 | 360 | Promoter (<=1kb)  | ENSG00000228290 | -657  |
| chr6 | 85404234 | 85404593 | 360 | Promoter (<=1kb)  | ENSG00000228290 | -112  |
| chr6 | 85404973 | 85405368 | 396 | Promoter (<=1kb)  | ENSG00000228290 | 268   |
| chr6 | 85405186 | 85405581 | 396 | Promoter (<=1kb)  | ENSG00000228290 | 481   |
| chr6 | 87866945 | 87867340 | 396 | Promoter (1-2kb)  | ENSG00000272008 | -1942 |
| chr6 | 90542447 | 90542842 | 396 | Promoter (2-3kb)  | ENSG00000118412 | 2787  |
| chr6 | 96023582 | 96023977 | 396 | Promoter (1-2kb)  | ENSG00000261366 | 1349  |
| chr6 | 1.01E+08 | 1.01E+08 | 360 | Promoter (2-3kb)  | ENSG00000228082 | 2958  |
| chr6 | 1.05E+08 | 1.05E+08 | 360 | Promoter (1-2kb)  | ENSG00000227535 | 1785  |
| chr6 | 1.07E+08 | 1.07E+08 | 396 | Promoter (<=1kb)  | ENSG00000269919 | 0     |
| chr6 | 1.07E+08 | 1.07E+08 | 396 | Promoter (<=1kb)  | ENSG00000235142 | -907  |
| chr6 | 1.07E+08 | 1.07E+08 | 396 | Promoter (2-3kb)  | ENSG00000235142 | -2507 |
| chr6 | 1.07E+08 | 1.07E+08 | 360 | Promoter (<=1kb)  | ENSG00000235142 | -128  |
| chr6 | 1.07E+08 | 1.07E+08 | 396 | Promoter (<=1kb)  | ENSG00000235142 | -146  |
| chr6 | 1.07E+08 | 1.07E+08 | 360 | Promoter (<=1kb)  | ENSG00000235142 | 0     |
| chr6 | 1.08E+08 | 1.08E+08 | 396 | Promoter (<=1kb)  | ENSG00000272476 | 639   |
| chr6 | 1.11E+08 | 1.11E+08 | 360 | Promoter (2-3kb)  | ENSG00000260188 | -2663 |
| chr6 | 1.12E+08 | 1.12E+08 | 360 | Promoter (1-2kb)  | ENSG00000231046 | 1563  |
| chr6 | 1.12E+08 | 1.12E+08 | 360 | Distal Intergenic | ENSG00000271789 | -4186 |
| chr6 | 1.12E+08 | 1.12E+08 | 360 | Promoter (2-3kb)  | ENSG00000271789 | 2450  |

|      |          |          |     |                     |                 |       |
|------|----------|----------|-----|---------------------|-----------------|-------|
| chr6 | 1.12E+08 | 1.12E+08 | 396 | Promoter (<=1kb)    | ENSG00000231889 | 289   |
| chr6 | 1.12E+08 | 1.12E+08 | 396 | Promoter (2-3kb)    | ENSG00000231889 | 2400  |
| chr6 | 1.14E+08 | 1.14E+08 | 396 | Promoter (1-2kb)    | ENSG00000223811 | 1691  |
| chr6 | 1.14E+08 | 1.14E+08 | 360 | Promoter (<=1kb)    | ENSG00000223811 | -841  |
| chr6 | 1.14E+08 | 1.14E+08 | 360 | Promoter (2-3kb)    | ENSG00000230943 | 2467  |
| chr6 | 1.14E+08 | 1.14E+08 | 396 | Intron (ENST000004) | ENSG00000230943 | -4015 |
| chr6 | 1.14E+08 | 1.14E+08 | 360 | Promoter (<=1kb)    | ENSG00000230943 | 636   |
| chr6 | 1.14E+08 | 1.14E+08 | 396 | Promoter (<=1kb)    | ENSG00000230943 | -67   |
| chr6 | 1.14E+08 | 1.14E+08 | 396 | Promoter (2-3kb)    | ENSG00000228624 | -2792 |
| chr6 | 1.15E+08 | 1.15E+08 | 396 | Intron (ENST000005) | ENSG00000228624 | -4176 |
| chr6 | 1.17E+08 | 1.17E+08 | 396 | Distal Intergenic   | ENSG00000236326 | -4361 |
| chr6 | 1.17E+08 | 1.17E+08 | 396 | Distal Intergenic   | ENSG00000237021 | -4087 |
| chr6 | 1.17E+08 | 1.17E+08 | 360 | Distal Intergenic   | ENSG00000237021 | -4039 |
| chr6 | 1.17E+08 | 1.17E+08 | 396 | Distal Intergenic   | ENSG00000237021 | -3885 |
| chr6 | 1.17E+08 | 1.17E+08 | 360 | Distal Intergenic   | ENSG00000237021 | -3501 |
| chr6 | 1.17E+08 | 1.17E+08 | 360 | Distal Intergenic   | ENSG00000240050 | -4164 |
| chr6 | 1.17E+08 | 1.17E+08 | 396 | Promoter (1-2kb)    | ENSG00000240050 | -1850 |
| chr6 | 1.17E+08 | 1.17E+08 | 396 | Distal Intergenic   | ENSG00000272403 | -3473 |
| chr6 | 1.17E+08 | 1.17E+08 | 396 | Distal Intergenic   | ENSG00000272403 | -3247 |
| chr6 | 1.17E+08 | 1.17E+08 | 396 | Promoter (<=1kb)    | ENSG00000272403 | 0     |
| chr6 | 1.17E+08 | 1.17E+08 | 396 | Promoter (1-2kb)    | ENSG00000272403 | 1350  |
| chr6 | 1.17E+08 | 1.17E+08 | 396 | Promoter (1-2kb)    | ENSG00000272403 | 1585  |
| chr6 | 1.18E+08 | 1.18E+08 | 396 | Promoter (2-3kb)    | ENSG00000226181 | -2976 |
| chr6 | 1.19E+08 | 1.19E+08 | 396 | Promoter (2-3kb)    | ENSG00000253194 | -2799 |
| chr6 | 1.19E+08 | 1.19E+08 | 396 | Promoter (<=1kb)    | ENSG00000253194 | 525   |
| chr6 | 1.26E+08 | 1.26E+08 | 396 | Promoter (2-3kb)    | ENSG00000237742 | -2803 |
| chr6 | 1.26E+08 | 1.26E+08 | 396 | Promoter (2-3kb)    | ENSG00000232131 | -2494 |
| chr6 | 1.26E+08 | 1.26E+08 | 360 | Distal Intergenic   | ENSG00000232131 | -3938 |
| chr6 | 1.28E+08 | 1.28E+08 | 396 | Promoter (1-2kb)    | ENSG00000227945 | 1332  |
| chr6 | 1.28E+08 | 1.28E+08 | 396 | Promoter (2-3kb)    | ENSG00000227945 | 2595  |
| chr6 | 1.3E+08  | 1.3E+08  | 396 | Promoter (<=1kb)    | ENSG00000226149 | -559  |
| chr6 | 1.31E+08 | 1.31E+08 | 396 | Distal Intergenic   | ENSG00000229923 | -3497 |
| chr6 | 1.31E+08 | 1.31E+08 | 396 | Promoter (2-3kb)    | ENSG00000229923 | -2772 |
| chr6 | 1.31E+08 | 1.31E+08 | 396 | Promoter (<=1kb)    | ENSG00000229923 | 193   |
| chr6 | 1.32E+08 | 1.32E+08 | 396 | Promoter (1-2kb)    | ENSG00000236673 | -1793 |
| chr6 | 1.32E+08 | 1.32E+08 | 360 | Promoter (<=1kb)    | ENSG00000236673 | -244  |
| chr6 | 1.32E+08 | 1.32E+08 | 396 | Promoter (<=1kb)    | ENSG00000236673 | -33   |
| chr6 | 1.32E+08 | 1.32E+08 | 396 | Promoter (2-3kb)    | ENSG00000236166 | -2399 |
| chr6 | 1.32E+08 | 1.32E+08 | 360 | Promoter (2-3kb)    | ENSG00000228495 | 2787  |
| chr6 | 1.32E+08 | 1.32E+08 | 396 | Promoter (<=1kb)    | ENSG00000228495 | -142  |
| chr6 | 1.32E+08 | 1.32E+08 | 396 | Promoter (<=1kb)    | ENSG00000228495 | 0     |
| chr6 | 1.32E+08 | 1.32E+08 | 396 | Promoter (2-3kb)    | ENSG00000228495 | 2204  |
| chr6 | 1.33E+08 | 1.33E+08 | 396 | Distal Intergenic   | ENSG00000231023 | -4547 |
| chr6 | 1.34E+08 | 1.34E+08 | 360 | Promoter (<=1kb)    | ENSG00000272428 | 980   |
| chr6 | 1.34E+08 | 1.34E+08 | 360 | Intron (ENST000006) | ENSG00000227954 | -4718 |
| chr6 | 1.35E+08 | 1.35E+08 | 396 | Promoter (2-3kb)    | ENSG00000236700 | -2298 |
| chr6 | 1.35E+08 | 1.35E+08 | 360 | Promoter (1-2kb)    | ENSG00000232310 | 1952  |
| chr6 | 1.35E+08 | 1.35E+08 | 396 | Promoter (1-2kb)    | ENSG00000232310 | -1525 |
| chr6 | 1.35E+08 | 1.35E+08 | 396 | Promoter (1-2kb)    | ENSG00000227723 | 1872  |
| chr6 | 1.36E+08 | 1.36E+08 | 396 | Distal Intergenic   | ENSG00000224374 | -4784 |
| chr6 | 1.37E+08 | 1.37E+08 | 360 | Promoter (<=1kb)    | ENSG00000237596 | -981  |
| chr6 | 1.37E+08 | 1.37E+08 | 396 | Distal Intergenic   | ENSG00000237596 | -3668 |
| chr6 | 1.37E+08 | 1.37E+08 | 396 | Promoter (2-3kb)    | ENSG00000260418 | 2663  |
| chr6 | 1.37E+08 | 1.37E+08 | 396 | Promoter (2-3kb)    | ENSG00000260418 | 2442  |
| chr6 | 1.37E+08 | 1.37E+08 | 396 | Promoter (<=1kb)    | ENSG00000235399 | -95   |
| chr6 | 1.38E+08 | 1.38E+08 | 360 | Promoter (2-3kb)    | ENSG00000229922 | -2477 |
| chr6 | 1.38E+08 | 1.38E+08 | 360 | Promoter (<=1kb)    | ENSG00000226004 | -448  |
| chr6 | 1.38E+08 | 1.38E+08 | 360 | Promoter (1-2kb)    | ENSG00000226004 | -1141 |

|      |          |          |     |                    |                 |       |
|------|----------|----------|-----|--------------------|-----------------|-------|
| chr6 | 1.39E+08 | 1.39E+08 | 360 | Promoter (2-3kb)   | ENSG00000225177 | -2610 |
| chr6 | 1.39E+08 | 1.39E+08 | 396 | Promoter (<=1kb)   | ENSG00000225177 | -653  |
| chr6 | 1.4E+08  | 1.4E+08  | 396 | Promoter (<=1kb)   | ENSG00000272446 | -269  |
| chr6 | 1.4E+08  | 1.4E+08  | 360 | Distal Intergenic  | ENSG00000226571 | -4367 |
| chr6 | 1.4E+08  | 1.4E+08  | 360 | Distal Intergenic  | ENSG00000226571 | -4163 |
| chr6 | 1.4E+08  | 1.4E+08  | 396 | Distal Intergenic  | ENSG00000226571 | -3381 |
| chr6 | 1.4E+08  | 1.4E+08  | 396 | Promoter (2-3kb)   | ENSG00000226571 | -2844 |
| chr6 | 1.4E+08  | 1.4E+08  | 396 | Distal Intergenic  | ENSG00000236013 | -4656 |
| chr6 | 1.43E+08 | 1.43E+08 | 360 | Promoter (1-2kb)   | ENSG00000237851 | -1263 |
| chr6 | 1.43E+08 | 1.43E+08 | 360 | Promoter (1-2kb)   | ENSG00000237851 | -1049 |
| chr6 | 1.43E+08 | 1.43E+08 | 360 | Promoter (<=1kb)   | ENSG00000237851 | 493   |
| chr6 | 1.43E+08 | 1.43E+08 | 396 | Promoter (1-2kb)   | ENSG00000224460 | -1431 |
| chr6 | 1.43E+08 | 1.43E+08 | 360 | Distal Intergenic  | ENSG00000224460 | -3315 |
| chr6 | 1.43E+08 | 1.43E+08 | 396 | Promoter (1-2kb)   | ENSG00000227192 | 1006  |
| chr6 | 1.43E+08 | 1.43E+08 | 396 | Distal Intergenic  | ENSG00000227192 | -3128 |
| chr6 | 1.43E+08 | 1.43E+08 | 396 | Promoter (2-3kb)   | ENSG00000225752 | -2495 |
| chr6 | 1.45E+08 | 1.45E+08 | 360 | Promoter (<=1kb)   | ENSG00000225311 | 389   |
| chr6 | 1.45E+08 | 1.45E+08 | 360 | Promoter (<=1kb)   | ENSG00000225311 | 188   |
| chr6 | 1.45E+08 | 1.45E+08 | 396 | Promoter (<=1kb)   | ENSG00000225311 | 0     |
| chr6 | 1.45E+08 | 1.45E+08 | 360 | Distal Intergenic  | ENSG00000225311 | -3060 |
| chr6 | 1.47E+08 | 1.47E+08 | 360 | Promoter (<=1kb)   | ENSG00000272397 | 0     |
| chr6 | 1.47E+08 | 1.47E+08 | 360 | Intron (ENST000004 | ENSG00000272397 | -3418 |
| chr6 | 1.47E+08 | 1.47E+08 | 360 | Promoter (<=1kb)   | ENSG00000233452 | -874  |
| chr6 | 1.47E+08 | 1.47E+08 | 360 | Promoter (<=1kb)   | ENSG00000196634 | 0     |
| chr6 | 1.48E+08 | 1.48E+08 | 396 | Promoter (1-2kb)   | ENSG00000234675 | 1128  |
| chr6 | 1.48E+08 | 1.48E+08 | 396 | Promoter (<=1kb)   | ENSG00000234675 | 890   |
| chr6 | 1.48E+08 | 1.48E+08 | 396 | Promoter (<=1kb)   | ENSG00000234675 | 0     |
| chr6 | 1.48E+08 | 1.48E+08 | 396 | Promoter (<=1kb)   | ENSG00000234675 | 0     |
| chr6 | 1.48E+08 | 1.48E+08 | 360 | Promoter (1-2kb)   | ENSG00000234675 | -1750 |
| chr6 | 1.48E+08 | 1.48E+08 | 360 | Promoter (1-2kb)   | ENSG00000234675 | -1962 |
| chr6 | 1.5E+08  | 1.5E+08  | 360 | Promoter (<=1kb)   | ENSG00000225924 | 997   |
| chr6 | 1.5E+08  | 1.5E+08  | 360 | Promoter (1-2kb)   | ENSG00000225924 | -1133 |
| chr6 | 1.5E+08  | 1.5E+08  | 396 | Promoter (1-2kb)   | ENSG00000225924 | -1585 |
| chr6 | 1.5E+08  | 1.5E+08  | 360 | Promoter (<=1kb)   | ENSG00000237502 | 838   |
| chr6 | 1.5E+08  | 1.5E+08  | 396 | Distal Intergenic  | ENSG00000237502 | -3396 |
| chr6 | 1.5E+08  | 1.5E+08  | 360 | Promoter (<=1kb)   | ENSG00000231760 | 140   |
| chr6 | 1.51E+08 | 1.51E+08 | 396 | Promoter (2-3kb)   | ENSG00000232290 | 2793  |
| chr6 | 1.51E+08 | 1.51E+08 | 396 | Distal Intergenic  | ENSG00000232290 | -3256 |
| chr6 | 1.53E+08 | 1.53E+08 | 396 | Promoter (1-2kb)   | ENSG00000224893 | 1873  |
| chr6 | 1.56E+08 | 1.56E+08 | 396 | Promoter (2-3kb)   | ENSG00000232529 | 2506  |
| chr6 | 1.56E+08 | 1.56E+08 | 396 | Promoter (2-3kb)   | ENSG00000232529 | 2216  |
| chr6 | 1.56E+08 | 1.56E+08 | 360 | Distal Intergenic  | ENSG00000232529 | -3908 |
| chr6 | 1.57E+08 | 1.57E+08 | 360 | Distal Intergenic  | ENSG00000227360 | -3876 |
| chr6 | 1.57E+08 | 1.57E+08 | 396 | Distal Intergenic  | ENSG00000227360 | -3961 |
| chr6 | 1.57E+08 | 1.57E+08 | 360 | Promoter (<=1kb)   | ENSG00000271265 | -289  |
| chr6 | 1.57E+08 | 1.57E+08 | 360 | Promoter (<=1kb)   | ENSG00000271265 | -504  |
| chr6 | 1.57E+08 | 1.57E+08 | 396 | Promoter (<=1kb)   | ENSG00000271265 | -733  |
| chr6 | 1.58E+08 | 1.58E+08 | 396 | Promoter (1-2kb)   | ENSG00000271040 | 1207  |
| chr6 | 1.58E+08 | 1.58E+08 | 396 | Distal Intergenic  | ENSG00000234361 | -3136 |
| chr6 | 1.58E+08 | 1.58E+08 | 396 | Promoter (2-3kb)   | ENSG00000236324 | -2460 |
| chr6 | 1.58E+08 | 1.58E+08 | 396 | Distal Intergenic  | ENSG00000236324 | -3050 |
| chr6 | 1.58E+08 | 1.58E+08 | 360 | Promoter (1-2kb)   | ENSG00000233496 | -1485 |
| chr6 | 1.59E+08 | 1.59E+08 | 396 | Promoter (<=1kb)   | ENSG00000236537 | 895   |
| chr6 | 1.59E+08 | 1.59E+08 | 360 | Promoter (1-2kb)   | ENSG00000236537 | 1024  |
| chr6 | 1.59E+08 | 1.59E+08 | 360 | Promoter (1-2kb)   | ENSG00000236537 | 1223  |
| chr6 | 1.59E+08 | 1.59E+08 | 360 | Promoter (1-2kb)   | ENSG00000238019 | 1828  |
| chr6 | 1.59E+08 | 1.59E+08 | 360 | Promoter (1-2kb)   | ENSG00000238019 | 1251  |
| chr6 | 1.59E+08 | 1.59E+08 | 396 | Promoter (<=1kb)   | ENSG00000238019 | 0     |



|      |          |          |     |                   |                 |       |
|------|----------|----------|-----|-------------------|-----------------|-------|
| chr6 | 1.59E+08 | 1.59E+08 | 360 | Promoter (<=1kb)  | ENSG00000238019 | 0     |
| chr6 | 1.59E+08 | 1.59E+08 | 360 | Distal Intergenic | ENSG00000233893 | -4351 |
| chr6 | 1.59E+08 | 1.59E+08 | 360 | Distal Intergenic | ENSG00000233893 | -4088 |
| chr6 | 1.59E+08 | 1.59E+08 | 360 | Promoter (<=1kb)  | ENSG00000233893 | 50    |
| chr6 | 1.59E+08 | 1.59E+08 | 360 | Distal Intergenic | ENSG00000226032 | -3298 |
| chr6 | 1.6E+08  | 1.6E+08  | 360 | Promoter (<=1kb)  | ENSG00000234777 | 472   |
| chr6 | 1.6E+08  | 1.6E+08  | 396 | Promoter (2-3kb)  | ENSG00000234777 | 2280  |
| chr6 | 1.66E+08 | 1.66E+08 | 396 | Promoter (1-2kb)  | ENSG00000223414 | 1723  |
| chr6 | 1.66E+08 | 1.66E+08 | 360 | Promoter (1-2kb)  | ENSG00000223414 | 1701  |
| chr6 | 1.66E+08 | 1.66E+08 | 360 | Promoter (<=1kb)  | ENSG00000223414 | 296   |
| chr6 | 1.66E+08 | 1.66E+08 | 396 | Promoter (<=1kb)  | ENSG00000223414 | 236   |
| chr6 | 1.66E+08 | 1.66E+08 | 360 | Distal Intergenic | ENSG00000223414 | -4633 |
| chr6 | 1.67E+08 | 1.67E+08 | 396 | Distal Intergenic | ENSG00000231654 | -3769 |
| chr6 | 1.67E+08 | 1.67E+08 | 360 | Promoter (<=1kb)  | ENSG00000227598 | 0     |
| chr6 | 1.68E+08 | 1.68E+08 | 360 | Promoter (1-2kb)  | ENSG00000231720 | 1338  |
| chr6 | 1.68E+08 | 1.68E+08 | 360 | Promoter (<=1kb)  | ENSG00000198221 | -147  |
| chr6 | 1.68E+08 | 1.68E+08 | 396 | Distal Intergenic | ENSG00000229921 | -3049 |
| chr6 | 1.69E+08 | 1.69E+08 | 360 | Promoter (1-2kb)  | ENSG00000237987 | -1315 |
| chr6 | 1.69E+08 | 1.69E+08 | 360 | Promoter (1-2kb)  | ENSG00000235815 | -1821 |
| chr6 | 1.69E+08 | 1.69E+08 | 360 | Promoter (<=1kb)  | ENSG00000225879 | -517  |
| chr6 | 1.69E+08 | 1.69E+08 | 396 | Promoter (2-3kb)  | ENSG00000234519 | -2654 |
| chr6 | 1.7E+08  | 1.7E+08  | 396 | Promoter (1-2kb)  | ENSG00000223485 | 1575  |
| chr6 | 1.7E+08  | 1.7E+08  | 360 | Distal Intergenic | ENSG00000223485 | -3984 |
| chr6 | 1.7E+08  | 1.7E+08  | 360 | Promoter (<=1kb)  | ENSG00000226194 | -848  |
| chr6 | 1.7E+08  | 1.7E+08  | 360 | Promoter (1-2kb)  | ENSG00000226194 | -1073 |
| chr6 | 1.7E+08  | 1.7E+08  | 360 | Promoter (1-2kb)  | ENSG00000226194 | -1520 |
| chr6 | 1.7E+08  | 1.7E+08  | 396 | Promoter (1-2kb)  | ENSG00000226194 | -1749 |
| chr6 | 1.7E+08  | 1.7E+08  | 396 | Promoter (1-2kb)  | ENSG00000226194 | -1981 |
| chr6 | 1.7E+08  | 1.7E+08  | 396 | Promoter (2-3kb)  | ENSG00000272848 | 2598  |
| chr6 | 1.7E+08  | 1.7E+08  | 396 | Distal Intergenic | ENSG00000272848 | -4179 |
| chr6 | 1.7E+08  | 1.7E+08  | 396 | Distal Intergenic | ENSG00000272848 | -4426 |
| chr6 | 1.7E+08  | 1.7E+08  | 396 | Distal Intergenic | ENSG00000272848 | -4870 |
| chr6 | 1.7E+08  | 1.7E+08  | 360 | Promoter (<=1kb)  | ENSG00000227704 | -938  |
| chr6 | 1.7E+08  | 1.7E+08  | 360 | Distal Intergenic | ENSG00000266896 | -3324 |
| chr6 | 1.7E+08  | 1.7E+08  | 360 | Promoter (<=1kb)  | ENSG00000229214 | -716  |
| chr6 | 1.7E+08  | 1.7E+08  | 396 | Distal Intergenic | ENSG00000273100 | -3463 |
| chr6 | 1.71E+08 | 1.71E+08 | 360 | Promoter (<=1kb)  | ENSG00000227508 | -865  |
| chr6 | 1.71E+08 | 1.71E+08 | 396 | Promoter (<=1kb)  | ENSG00000227508 | 148   |
| chr6 | 1.71E+08 | 1.71E+08 | 360 | Promoter (<=1kb)  | ENSG00000227508 | 304   |
| chr6 | 1.71E+08 | 1.71E+08 | 360 | Promoter (<=1kb)  | ENSG00000271820 | 478   |
| chr6 | 1.71E+08 | 1.71E+08 | 360 | Promoter (2-3kb)  | ENSG00000227508 | 2400  |
| chr7 | 148816   | 149211   | 396 | Promoter (<=1kb)  | ENSG00000242474 | 151   |
| chr7 | 174058   | 174417   | 360 | Promoter (<=1kb)  | ENSG00000239715 | -503  |
| chr7 | 194234   | 194593   | 360 | Promoter (<=1kb)  | ENSG00000240093 | -54   |
| chr7 | 194378   | 194773   | 396 | Promoter (<=1kb)  | ENSG00000240093 | -198  |
| chr7 | 194703   | 195098   | 396 | Promoter (<=1kb)  | ENSG00000240093 | -523  |
| chr7 | 194971   | 195330   | 360 | Promoter (<=1kb)  | ENSG00000240093 | -791  |
| chr7 | 194976   | 195371   | 396 | Promoter (<=1kb)  | ENSG00000240093 | -796  |
| chr7 | 326841   | 327236   | 396 | Distal Intergenic | ENSG00000248767 | -4074 |
| chr7 | 332515   | 332910   | 396 | Promoter (1-2kb)  | ENSG00000248767 | 1205  |
| chr7 | 532762   | 533157   | 396 | Promoter (2-3kb)  | ENSG00000234471 | 2598  |
| chr7 | 538277   | 538672   | 396 | Promoter (2-3kb)  | ENSG00000234471 | -2522 |
| chr7 | 539316   | 539675   | 360 | Distal Intergenic | ENSG00000234471 | -3561 |
| chr7 | 539866   | 540261   | 396 | Distal Intergenic | ENSG00000234471 | -4111 |
| chr7 | 1065833  | 1066228  | 396 | Promoter (2-3kb)  | ENSG00000225146 | -2433 |
| chr7 | 1101951  | 1102346  | 396 | Distal Intergenic | ENSG00000257607 | -3054 |
| chr7 | 1101994  | 1102353  | 360 | Distal Intergenic | ENSG00000257607 | -3097 |
| chr7 | 1123479  | 1123838  | 360 | Promoter (2-3kb)  | ENSG00000226291 | 2980  |

|      |          |          |     |                     |                 |       |
|------|----------|----------|-----|---------------------|-----------------|-------|
| chr7 | 1498172  | 1498531  | 360 | Promoter (1-2kb)    | ENSG00000225981 | -1042 |
| chr7 | 1504162  | 1504557  | 396 | Promoter (2-3kb)    | ENSG00000273230 | 2601  |
| chr7 | 1507054  | 1507413  | 360 | Promoter (<=1kb)    | ENSG00000273230 | 0     |
| chr7 | 1507328  | 1507687  | 360 | Promoter (<=1kb)    | ENSG00000273230 | -170  |
| chr7 | 2421798  | 2422193  | 396 | Promoter (1-2kb)    | ENSG00000230914 | -1563 |
| chr7 | 2474903  | 2475298  | 396 | Promoter (2-3kb)    | ENSG00000175873 | -2100 |
| chr7 | 2475123  | 2475482  | 360 | Promoter (1-2kb)    | ENSG00000175873 | -1916 |
| chr7 | 2518975  | 2519370  | 396 | Promoter (2-3kb)    | ENSG00000236734 | -2447 |
| chr7 | 5513499  | 5513858  | 360 | Promoter (1-2kb)    | ENSG00000230733 | -1577 |
| chr7 | 5514063  | 5514422  | 360 | Promoter (1-2kb)    | ENSG00000230733 | -1013 |
| chr7 | 5514590  | 5514949  | 360 | Promoter (<=1kb)    | ENSG00000230733 | -486  |
| chr7 | 5514663  | 5515058  | 396 | Promoter (<=1kb)    | ENSG00000230733 | -377  |
| chr7 | 5514808  | 5515167  | 360 | Promoter (<=1kb)    | ENSG00000230733 | -268  |
| chr7 | 5514869  | 5515264  | 396 | Promoter (<=1kb)    | ENSG00000230733 | -171  |
| chr7 | 5592686  | 5593081  | 396 | Distal Intergenic   | ENSG00000272719 | -3281 |
| chr7 | 5593218  | 5593577  | 360 | Promoter (2-3kb)    | ENSG00000272719 | -2785 |
| chr7 | 5593425  | 5593784  | 360 | Promoter (2-3kb)    | ENSG00000272719 | -2578 |
| chr7 | 5594709  | 5595104  | 396 | Promoter (1-2kb)    | ENSG00000272719 | -1258 |
| chr7 | 5721321  | 5721680  | 360 | Promoter (1-2kb)    | ENSG00000237738 | -1229 |
| chr7 | 6116990  | 6117349  | 360 | Distal Intergenic   | ENSG00000231704 | -3385 |
| chr7 | 6118615  | 6118974  | 360 | Promoter (1-2kb)    | ENSG00000231704 | -1760 |
| chr7 | 6119170  | 6119529  | 360 | Promoter (1-2kb)    | ENSG00000231704 | -1205 |
| chr7 | 6628112  | 6628471  | 360 | Promoter (<=1kb)    | ENSG00000232581 | 134   |
| chr7 | 6631295  | 6631654  | 360 | Promoter (2-3kb)    | ENSG00000232581 | -2690 |
| chr7 | 6690979  | 6691338  | 360 | Distal Intergenic   | ENSG00000260054 | -3157 |
| chr7 | 6701136  | 6701531  | 396 | Promoter (2-3kb)    | ENSG00000228010 | -2074 |
| chr7 | 6701338  | 6701733  | 396 | Promoter (1-2kb)    | ENSG00000228010 | -1872 |
| chr7 | 7990817  | 7991212  | 396 | Promoter (<=1kb)    | ENSG00000234141 | -477  |
| chr7 | 7994821  | 7995180  | 360 | Downstream (2-3kb)  | ENSG00000234141 | -4481 |
| chr7 | 16309252 | 16309647 | 396 | Promoter (<=1kb)    | ENSG00000229688 | 378   |
| chr7 | 17339755 | 17340114 | 360 | Promoter (<=1kb)    | ENSG00000237773 | -774  |
| chr7 | 25992614 | 25992973 | 360 | Distal Intergenic   | ENSG00000270933 | -3591 |
| chr7 | 26436711 | 26437070 | 360 | Promoter (1-2kb)    | ENSG00000214870 | -1143 |
| chr7 | 27135899 | 27136294 | 396 | Promoter (<=1kb)    | ENSG00000233429 | 47    |
| chr7 | 27136752 | 27137147 | 396 | Promoter (<=1kb)    | ENSG00000233429 | 900   |
| chr7 | 27143603 | 27143998 | 396 | Distal Intergenic   | ENSG00000253552 | -3398 |
| chr7 | 27149770 | 27150165 | 396 | Promoter (2-3kb)    | ENSG00000253552 | 2374  |
| chr7 | 27150315 | 27150710 | 396 | Promoter (2-3kb)    | ENSG00000253552 | -2845 |
| chr7 | 27150888 | 27151283 | 396 | Promoter (2-3kb)    | ENSG00000253552 | -2272 |
| chr7 | 27155495 | 27155854 | 360 | Promoter (<=1kb)    | ENSG00000253552 | 0     |
| chr7 | 27160491 | 27160886 | 396 | Promoter (<=1kb)    | ENSG00000253552 | 0     |
| chr7 | 27166119 | 27166514 | 396 | Intron (ENST000005: | ENSG00000254369 | -3082 |
| chr7 | 27179491 | 27179850 | 360 | Promoter (<=1kb)    | ENSG00000254369 | -133  |
| chr7 | 27195405 | 27195764 | 360 | Promoter (2-3kb)    | ENSG00000270182 | -2199 |
| chr7 | 29249061 | 29249456 | 396 | Promoter (<=1kb)    | ENSG00000235669 | -475  |
| chr7 | 29249120 | 29249479 | 360 | Promoter (<=1kb)    | ENSG00000235669 | -534  |
| chr7 | 30026669 | 30027064 | 396 | Promoter (1-2kb)    | ENSG00000227014 | -1152 |
| chr7 | 30026880 | 30027275 | 396 | Promoter (<=1kb)    | ENSG00000227014 | -941  |
| chr7 | 30029053 | 30029448 | 396 | Promoter (<=1kb)    | ENSG00000227014 | 837   |
| chr7 | 30029153 | 30029512 | 360 | Promoter (<=1kb)    | ENSG00000227014 | 937   |
| chr7 | 30178905 | 30179300 | 396 | Promoter (1-2kb)    | ENSG00000230751 | -1186 |
| chr7 | 30459591 | 30459986 | 396 | Distal Intergenic   | ENSG00000272638 | -4302 |
| chr7 | 30459633 | 30459992 | 360 | Distal Intergenic   | ENSG00000272638 | -4296 |
| chr7 | 30564248 | 30564643 | 396 | Promoter (<=1kb)    | ENSG00000264520 | -704  |
| chr7 | 30585755 | 30586114 | 360 | Intron (ENST000004: | ENSG00000263683 | -3719 |
| chr7 | 30594604 | 30594963 | 360 | Promoter (2-3kb)    | ENSG00000196295 | -2768 |
| chr7 | 30594605 | 30595000 | 396 | Promoter (2-3kb)    | ENSG00000196295 | -2769 |
| chr7 | 30594812 | 30595171 | 360 | Promoter (2-3kb)    | ENSG00000196295 | -2976 |

|      |          |          |     |                      |                 |       |
|------|----------|----------|-----|----------------------|-----------------|-------|
| chr7 | 30596040 | 30596435 | 396 | Exon (ENST0000035:)  | ENSG00000196295 | -4204 |
| chr7 | 32881801 | 32882196 | 396 | Promoter (2-3kb)     | ENSG00000272905 | -2810 |
| chr7 | 32882022 | 32882417 | 396 | Promoter (2-3kb)     | ENSG00000272905 | -2589 |
| chr7 | 33917652 | 33918011 | 360 | Distal Intergenic    | ENSG00000233219 | -3809 |
| chr7 | 35733917 | 35734276 | 360 | Promoter (<=1kb)     | ENSG00000271122 | -548  |
| chr7 | 35734117 | 35734476 | 360 | Promoter (<=1kb)     | ENSG00000271122 | -348  |
| chr7 | 36137458 | 36137817 | 360 | Promoter (2-3kb)     | ENSG00000261184 | 2560  |
| chr7 | 36272993 | 36273352 | 360 | Promoter (2-3kb)     | ENSG00000229679 | -2277 |
| chr7 | 36773934 | 36774293 | 360 | Promoter (<=1kb)     | ENSG00000272984 | 0     |
| chr7 | 36879904 | 36880263 | 360 | Promoter (1-2kb)     | ENSG00000230831 | 1327  |
| chr7 | 37032043 | 37032438 | 396 | Distal Intergenic    | ENSG00000224101 | -4963 |
| chr7 | 42888411 | 42888770 | 360 | Distal Intergenic    | ENSG00000231539 | -4374 |
| chr7 | 43560928 | 43561287 | 360 | Promoter (<=1kb)     | ENSG00000231638 | 854   |
| chr7 | 43561038 | 43561433 | 396 | Promoter (<=1kb)     | ENSG00000231638 | 708   |
| chr7 | 44044344 | 44044739 | 396 | Promoter (2-3kb)     | ENSG00000228434 | 2726  |
| chr7 | 44044530 | 44044889 | 360 | Promoter (2-3kb)     | ENSG00000228434 | 2576  |
| chr7 | 44884830 | 44885225 | 396 | Promoter (2-3kb)     | ENSG00000234183 | -2790 |
| chr7 | 44885479 | 44885874 | 396 | Promoter (2-3kb)     | ENSG00000234183 | -2141 |
| chr7 | 44885554 | 44885913 | 360 | Promoter (2-3kb)     | ENSG00000234183 | -2102 |
| chr7 | 44998795 | 44999190 | 396 | Promoter (1-2kb)     | ENSG00000260997 | 1318  |
| chr7 | 44999574 | 44999969 | 396 | Promoter (<=1kb)     | ENSG00000260997 | 539   |
| chr7 | 45023295 | 45023654 | 360 | Promoter (1-2kb)     | ENSG00000232956 | 1455  |
| chr7 | 45854262 | 45854621 | 360 | Promoter (<=1kb)     | ENSG00000272556 | 61    |
| chr7 | 46523164 | 46523523 | 360 | Promoter (1-2kb)     | ENSG00000230680 | -1988 |
| chr7 | 50595031 | 50595390 | 360 | Distal Intergenic    | ENSG00000226122 | -4067 |
| chr7 | 50597326 | 50597721 | 396 | Promoter (1-2kb)     | ENSG00000226122 | -1736 |
| chr7 | 50599446 | 50599805 | 360 | Promoter (<=1kb)     | ENSG00000226122 | 0     |
| chr7 | 55255477 | 55255836 | 360 | Promoter (<=1kb)     | ENSG00000224057 | 791   |
| chr7 | 55255676 | 55256035 | 360 | Promoter (<=1kb)     | ENSG00000224057 | 592   |
| chr7 | 66005470 | 66005829 | 360 | Promoter (1-2kb)     | ENSG00000229180 | 1707  |
| chr7 | 66114487 | 66114882 | 396 | Distal Intergenic    | ENSG00000226824 | -4643 |
| chr7 | 66114722 | 66115117 | 396 | Distal Intergenic    | ENSG00000226824 | -4408 |
| chr7 | 66114775 | 66115134 | 360 | Distal Intergenic    | ENSG00000226824 | -4391 |
| chr7 | 66119245 | 66119604 | 360 | Promoter (<=1kb)     | ENSG00000226824 | 0     |
| chr7 | 66119449 | 66119808 | 360 | Promoter (<=1kb)     | ENSG00000226824 | 0     |
| chr7 | 66205043 | 66205438 | 396 | Promoter (<=1kb)     | ENSG00000272831 | 0     |
| chr7 | 66205242 | 66205637 | 396 | Promoter (<=1kb)     | ENSG00000272831 | 0     |
| chr7 | 66800757 | 66801116 | 360 | Promoter (<=1kb)     | ENSG00000235475 | 0     |
| chr7 | 66803363 | 66803722 | 360 | Promoter (2-3kb)     | ENSG00000235475 | 2400  |
| chr7 | 66803597 | 66803956 | 360 | Promoter (2-3kb)     | ENSG00000235475 | 2634  |
| chr7 | 67553621 | 67554016 | 396 | Promoter (2-3kb)     | ENSG00000236531 | -2194 |
| chr7 | 76107047 | 76107442 | 396 | Promoter (<=1kb)     | ENSG00000250614 | 731   |
| chr7 | 76107935 | 76108330 | 396 | Promoter (<=1kb)     | ENSG00000250614 | 0     |
| chr7 | 76108990 | 76109385 | 396 | Promoter (<=1kb)     | ENSG00000250614 | -817  |
| chr7 | 76110978 | 76111337 | 360 | Promoter (2-3kb)     | ENSG00000250614 | -2805 |
| chr7 | 84177946 | 84178305 | 360 | Promoter (<=1kb)     | ENSG00000235139 | -217  |
| chr7 | 87842942 | 87843301 | 360 | Promoter (2-3kb)     | ENSG00000254003 | -2674 |
| chr7 | 87873328 | 87873687 | 360 | Promoter (<=1kb)     | ENSG00000228113 | 228   |
| chr7 | 87875840 | 87876235 | 396 | Promoter (2-3kb)     | ENSG00000228113 | 2740  |
| chr7 | 87875924 | 87876283 | 360 | Promoter (2-3kb)     | ENSG00000228113 | 2824  |
| chr7 | 87876059 | 87876454 | 396 | Promoter (2-3kb)     | ENSG00000228113 | 2959  |
| chr7 | 87908745 | 87909104 | 360 | Promoter (2-3kb)     | ENSG00000228113 | 2429  |
| chr7 | 91765531 | 91765890 | 360 | Promoter (1-2kb)     | ENSG00000188693 | 1613  |
| chr7 | 92114303 | 92114698 | 396 | Intron (ENST000004:) | ENSG00000244055 | -4701 |
| chr7 | 92114594 | 92114989 | 396 | Intron (ENST000004:) | ENSG00000244055 | -4410 |
| chr7 | 92463473 | 92463832 | 360 | Promoter (1-2kb)     | ENSG00000237819 | -1965 |
| chr7 | 95045280 | 95045675 | 396 | Promoter (<=1kb)     | ENSG00000273138 | 0     |
| chr7 | 99190578 | 99190937 | 360 | Distal Intergenic    | ENSG00000244219 | -4752 |

|      |          |          |     |                     |                 |       |
|------|----------|----------|-----|---------------------|-----------------|-------|
| chr7 | 99190672 | 99191067 | 396 | Distal Intergenic   | ENSG00000244219 | -4622 |
| chr7 | 99200433 | 99200792 | 360 | Promoter (1-2kb)    | ENSG00000244219 | -1211 |
| chr7 | 99365408 | 99365767 | 360 | Promoter (1-2kb)    | ENSG00000273407 | 1242  |
| chr7 | 99365461 | 99365856 | 396 | Promoter (1-2kb)    | ENSG00000273407 | 1295  |
| chr7 | 99729981 | 99730340 | 360 | Promoter (1-2kb)    | ENSG00000235077 | 1394  |
| chr7 | 1E+08    | 1E+08    | 360 | Promoter (2-3kb)    | ENSG00000240211 | 2016  |
| chr7 | 1E+08    | 1E+08    | 396 | Distal Intergenic   | ENSG00000225807 | -4991 |
| chr7 | 1E+08    | 1E+08    | 360 | Promoter (<=1kb)    | ENSG00000224729 | -156  |
| chr7 | 1E+08    | 1E+08    | 360 | Promoter (<=1kb)    | ENSG00000236305 | -57   |
| chr7 | 1E+08    | 1E+08    | 396 | Promoter (<=1kb)    | ENSG00000236305 | -340  |
| chr7 | 1.01E+08 | 1.01E+08 | 360 | Promoter (<=1kb)    | ENSG00000225946 | 536   |
| chr7 | 1.01E+08 | 1.01E+08 | 396 | Promoter (<=1kb)    | ENSG00000225946 | 349   |
| chr7 | 1.01E+08 | 1.01E+08 | 360 | Promoter (<=1kb)    | ENSG00000225946 | 324   |
| chr7 | 1.01E+08 | 1.01E+08 | 360 | Promoter (<=1kb)    | ENSG00000225946 | -31   |
| chr7 | 1.01E+08 | 1.01E+08 | 396 | Promoter (1-2kb)    | ENSG00000225946 | -1238 |
| chr7 | 1.01E+08 | 1.01E+08 | 360 | Distal Intergenic   | ENSG00000260336 | -4614 |
| chr7 | 1.01E+08 | 1.01E+08 | 360 | Promoter (2-3kb)    | ENSG00000260336 | 2140  |
| chr7 | 1.01E+08 | 1.01E+08 | 360 | Promoter (<=1kb)    | ENSG00000232445 | 372   |
| chr7 | 1.01E+08 | 1.01E+08 | 396 | Distal Intergenic   | ENSG00000233123 | -4505 |
| chr7 | 1.02E+08 | 1.02E+08 | 396 | Distal Intergenic   | ENSG00000272219 | -3956 |
| chr7 | 1.04E+08 | 1.04E+08 | 360 | Promoter (1-2kb)    | ENSG00000226869 | -1115 |
| chr7 | 1.05E+08 | 1.05E+08 | 360 | Promoter (<=1kb)    | ENSG00000242154 | 0     |
| chr7 | 1.05E+08 | 1.05E+08 | 396 | Promoter (<=1kb)    | ENSG00000242154 | 0     |
| chr7 | 1.05E+08 | 1.05E+08 | 396 | Promoter (<=1kb)    | ENSG00000242154 | 200   |
| chr7 | 1.05E+08 | 1.05E+08 | 360 | Promoter (<=1kb)    | ENSG00000242154 | 521   |
| chr7 | 1.06E+08 | 1.06E+08 | 396 | Promoter (<=1kb)    | ENSG00000273320 | 776   |
| chr7 | 1.06E+08 | 1.06E+08 | 396 | Promoter (<=1kb)    | ENSG00000243797 | 0     |
| chr7 | 1.06E+08 | 1.06E+08 | 396 | Intron (ENST000005) | ENSG00000243797 | -4574 |
| chr7 | 1.06E+08 | 1.06E+08 | 360 | Intron (ENST000005) | ENSG00000243797 | -4586 |
| chr7 | 1.06E+08 | 1.06E+08 | 396 | Intron (ENST000005) | ENSG00000243797 | -4804 |
| chr7 | 1.06E+08 | 1.06E+08 | 360 | Intron (ENST000005) | ENSG00000243797 | -4901 |
| chr7 | 1.07E+08 | 1.07E+08 | 360 | Promoter (2-3kb)    | ENSG00000272072 | 2905  |
| chr7 | 1.08E+08 | 1.08E+08 | 360 | Promoter (2-3kb)    | ENSG00000273055 | -2536 |
| chr7 | 1.08E+08 | 1.08E+08 | 396 | Promoter (2-3kb)    | ENSG00000273055 | -2406 |
| chr7 | 1.08E+08 | 1.08E+08 | 360 | Promoter (2-3kb)    | ENSG00000273055 | -2335 |
| chr7 | 1.08E+08 | 1.08E+08 | 396 | Distal Intergenic   | ENSG00000225647 | -4457 |
| chr7 | 1.08E+08 | 1.08E+08 | 396 | Distal Intergenic   | ENSG00000225647 | -4249 |
| chr7 | 1.12E+08 | 1.12E+08 | 360 | Promoter (2-3kb)    | ENSG00000226851 | 2950  |
| chr7 | 1.13E+08 | 1.13E+08 | 396 | Promoter (2-3kb)    | ENSG00000234520 | -2384 |
| chr7 | 1.16E+08 | 1.16E+08 | 360 | Promoter (<=1kb)    | ENSG00000243243 | 477   |
| chr7 | 1.16E+08 | 1.16E+08 | 396 | Promoter (<=1kb)    | ENSG00000243220 | 0     |
| chr7 | 1.16E+08 | 1.16E+08 | 360 | Promoter (<=1kb)    | ENSG00000243220 | -94   |
| chr7 | 1.17E+08 | 1.17E+08 | 360 | Distal Intergenic   | ENSG00000227199 | -3740 |
| chr7 | 1.17E+08 | 1.17E+08 | 360 | Promoter (2-3kb)    | ENSG00000226367 | -2210 |
| chr7 | 1.17E+08 | 1.17E+08 | 360 | Promoter (2-3kb)    | ENSG00000226367 | 2889  |
| chr7 | 1.17E+08 | 1.17E+08 | 360 | Promoter (2-3kb)    | ENSG00000226367 | 2656  |
| chr7 | 1.17E+08 | 1.17E+08 | 396 | Promoter (<=1kb)    | ENSG00000226367 | 662   |
| chr7 | 1.17E+08 | 1.17E+08 | 360 | Promoter (<=1kb)    | ENSG00000226367 | -749  |
| chr7 | 1.17E+08 | 1.17E+08 | 360 | Promoter (<=1kb)    | ENSG00000083622 | 0     |
| chr7 | 1.23E+08 | 1.23E+08 | 396 | Promoter (<=1kb)    | ENSG00000226680 | -333  |
| chr7 | 1.24E+08 | 1.24E+08 | 360 | Promoter (1-2kb)    | ENSG00000242593 | 1576  |
| chr7 | 1.27E+08 | 1.27E+08 | 396 | Promoter (1-2kb)    | ENSG00000224138 | 1973  |
| chr7 | 1.28E+08 | 1.28E+08 | 360 | Distal Intergenic   | ENSG00000272915 | -3833 |
| chr7 | 1.28E+08 | 1.28E+08 | 360 | Promoter (2-3kb)    | ENSG00000273270 | 2411  |
| chr7 | 1.28E+08 | 1.28E+08 | 360 | Promoter (2-3kb)    | ENSG00000273270 | 2138  |
| chr7 | 1.28E+08 | 1.28E+08 | 360 | Promoter (1-2kb)    | ENSG00000271553 | 1814  |
| chr7 | 1.28E+08 | 1.28E+08 | 360 | Distal Intergenic   | ENSG00000270810 | -4994 |
| chr7 | 1.29E+08 | 1.29E+08 | 396 | Promoter (2-3kb)    | ENSG00000135253 | -2719 |

|      |          |          |     |                     |                 |       |
|------|----------|----------|-----|---------------------|-----------------|-------|
| chr7 | 1.29E+08 | 1.29E+08 | 360 | Promoter (<=1kb)    | ENSG00000135253 | 0     |
| chr7 | 1.3E+08  | 1.3E+08  | 396 | Promoter (1-2kb)    | ENSG00000244036 | 1394  |
| chr7 | 1.3E+08  | 1.3E+08  | 360 | Promoter (2-3kb)    | ENSG00000244036 | -2545 |
| chr7 | 1.3E+08  | 1.3E+08  | 360 | Promoter (2-3kb)    | ENSG00000229196 | -2138 |
| chr7 | 1.3E+08  | 1.3E+08  | 396 | Promoter (1-2kb)    | ENSG00000229196 | -1517 |
| chr7 | 1.3E+08  | 1.3E+08  | 396 | Promoter (<=1kb)    | ENSG00000229196 | 0     |
| chr7 | 1.3E+08  | 1.3E+08  | 360 | Promoter (<=1kb)    | ENSG00000259920 | 540   |
| chr7 | 1.3E+08  | 1.3E+08  | 360 | Distal Intergenic   | ENSG00000271522 | -3800 |
| chr7 | 1.3E+08  | 1.3E+08  | 396 | Promoter (<=1kb)    | ENSG00000271522 | -317  |
| chr7 | 1.31E+08 | 1.31E+08 | 396 | Promoter (<=1kb)    | ENSG00000231721 | 454   |
| chr7 | 1.31E+08 | 1.31E+08 | 360 | Promoter (<=1kb)    | ENSG00000231721 | 0     |
| chr7 | 1.31E+08 | 1.31E+08 | 360 | Promoter (<=1kb)    | ENSG00000231721 | 429   |
| chr7 | 1.31E+08 | 1.31E+08 | 396 | Distal Intergenic   | ENSG00000236753 | -3305 |
| chr7 | 1.31E+08 | 1.31E+08 | 396 | Distal Intergenic   | ENSG00000236753 | -4321 |
| chr7 | 1.32E+08 | 1.32E+08 | 360 | Promoter (1-2kb)    | ENSG00000223436 | 1019  |
| chr7 | 1.34E+08 | 1.34E+08 | 360 | Promoter (2-3kb)    | ENSG00000224375 | -2052 |
| chr7 | 1.34E+08 | 1.34E+08 | 396 | Promoter (<=1kb)    | ENSG00000224375 | 379   |
| chr7 | 1.34E+08 | 1.34E+08 | 396 | Promoter (<=1kb)    | ENSG00000224375 | 582   |
| chr7 | 1.36E+08 | 1.36E+08 | 360 | Promoter (1-2kb)    | ENSG00000230649 | 1073  |
| chr7 | 1.38E+08 | 1.38E+08 | 360 | Promoter (<=1kb)    | ENSG00000225559 | -803  |
| chr7 | 1.4E+08  | 1.4E+08  | 396 | Promoter (1-2kb)    | ENSG00000240889 | 1168  |
| chr7 | 1.4E+08  | 1.4E+08  | 396 | Promoter (<=1kb)    | ENSG00000240889 | 915   |
| chr7 | 1.44E+08 | 1.44E+08 | 396 | Promoter (<=1kb)    | ENSG00000244198 | 0     |
| chr7 | 1.44E+08 | 1.44E+08 | 396 | Promoter (<=1kb)    | ENSG00000244198 | 0     |
| chr7 | 1.44E+08 | 1.44E+08 | 360 | Promoter (2-3kb)    | ENSG00000244198 | -2653 |
| chr7 | 1.44E+08 | 1.44E+08 | 396 | Promoter (2-3kb)    | ENSG00000244198 | -2604 |
| chr7 | 1.44E+08 | 1.44E+08 | 360 | Promoter (2-3kb)    | ENSG00000244198 | -2442 |
| chr7 | 1.44E+08 | 1.44E+08 | 396 | Promoter (<=1kb)    | ENSG00000244198 | 814   |
| chr7 | 1.44E+08 | 1.44E+08 | 360 | Promoter (2-3kb)    | ENSG00000244198 | 2123  |
| chr7 | 1.44E+08 | 1.44E+08 | 396 | Promoter (2-3kb)    | ENSG00000244198 | 2133  |
| chr7 | 1.44E+08 | 1.44E+08 | 360 | Promoter (2-3kb)    | ENSG00000244198 | 2336  |
| chr7 | 1.44E+08 | 1.44E+08 | 396 | Promoter (1-2kb)    | ENSG00000244479 | -1195 |
| chr7 | 1.49E+08 | 1.49E+08 | 396 | Distal Intergenic   | ENSG00000228151 | -4361 |
| chr7 | 1.49E+08 | 1.49E+08 | 396 | Distal Intergenic   | ENSG00000228151 | -4160 |
| chr7 | 1.49E+08 | 1.49E+08 | 396 | Distal Intergenic   | ENSG00000228151 | -3609 |
| chr7 | 1.49E+08 | 1.49E+08 | 396 | Distal Intergenic   | ENSG00000228151 | -3391 |
| chr7 | 1.49E+08 | 1.49E+08 | 360 | Promoter (<=1kb)    | ENSG00000228151 | 117   |
| chr7 | 1.49E+08 | 1.49E+08 | 360 | Promoter (<=1kb)    | ENSG00000228151 | 325   |
| chr7 | 1.5E+08  | 1.5E+08  | 396 | Promoter (1-2kb)    | ENSG00000197558 | 1503  |
| chr7 | 1.5E+08  | 1.5E+08  | 396 | Distal Intergenic   | ENSG00000242258 | -4412 |
| chr7 | 1.5E+08  | 1.5E+08  | 360 | Distal Intergenic   | ENSG00000242258 | -4388 |
| chr7 | 1.5E+08  | 1.5E+08  | 396 | Distal Intergenic   | ENSG00000242258 | -4170 |
| chr7 | 1.52E+08 | 1.52E+08 | 396 | Promoter (<=1kb)    | ENSG00000242048 | 0     |
| chr7 | 1.52E+08 | 1.52E+08 | 360 | Promoter (<=1kb)    | ENSG00000242048 | 30    |
| chr7 | 1.55E+08 | 1.55E+08 | 396 | Promoter (<=1kb)    | ENSG00000272760 | 403   |
| chr7 | 1.56E+08 | 1.56E+08 | 396 | Promoter (<=1kb)    | ENSG00000233878 | 812   |
| chr7 | 1.56E+08 | 1.56E+08 | 396 | Intron (ENST000004) | ENSG00000182648 | -3265 |
| chr7 | 1.56E+08 | 1.56E+08 | 360 | Promoter (<=1kb)    | ENSG00000182648 | 285   |
| chr7 | 1.57E+08 | 1.57E+08 | 396 | Promoter (2-3kb)    | ENSG00000235029 | -2580 |
| chr7 | 1.57E+08 | 1.57E+08 | 396 | Promoter (2-3kb)    | ENSG00000243479 | 2269  |
| chr7 | 1.57E+08 | 1.57E+08 | 396 | Promoter (2-3kb)    | ENSG00000243479 | 2480  |
| chr7 | 1.57E+08 | 1.57E+08 | 396 | Promoter (2-3kb)    | ENSG00000234210 | -2680 |
| chr7 | 1.57E+08 | 1.57E+08 | 396 | Promoter (<=1kb)    | ENSG00000233191 | -868  |
| chr7 | 1.58E+08 | 1.58E+08 | 360 | Promoter (1-2kb)    | ENSG00000225365 | -1485 |
| chr8 | 400565   | 400924   | 360 | Promoter (<=1kb)    | ENSG00000272293 | 419   |
| chr8 | 1708468  | 1708827  | 360 | Promoter (2-3kb)    | ENSG00000253982 | 2636  |
| chr8 | 6471801  | 6472196  | 396 | Promoter (2-3kb)    | ENSG00000271743 | 2523  |
| chr8 | 8283355  | 8283750  | 396 | Promoter (1-2kb)    | ENSG00000253505 | -1213 |

|      |          |          |     |                                     |                 |       |
|------|----------|----------|-----|-------------------------------------|-----------------|-------|
| chr8 | 8283584  | 8283979  | 396 | Promoter (1-2kb)                    | ENSG00000253505 | -1442 |
| chr8 | 8283704  | 8284063  | 360 | Promoter (1-2kb)                    | ENSG00000253505 | -1562 |
| chr8 | 9037189  | 9037584  | 396 | Promoter (2-3kb)                    | ENSG00000253252 | 2445  |
| chr8 | 9038499  | 9038858  | 360 | Promoter (1-2kb)                    | ENSG00000253252 | 1171  |
| chr8 | 9102629  | 9103024  | 396 | Distal Intergenic                   | ENSG00000254235 | -3903 |
| chr8 | 9102636  | 9102995  | 360 | Distal Intergenic                   | ENSG00000254235 | -3932 |
| chr8 | 9103937  | 9104296  | 360 | Promoter (2-3kb)                    | ENSG00000254235 | -2631 |
| chr8 | 10928451 | 10928846 | 396 | Distal Intergenic                   | ENSG00000254839 | -3852 |
| chr8 | 11702931 | 11703326 | 396 | Promoter (<=1kb)                    | ENSG00000269899 | 574   |
| chr8 | 11702972 | 11703331 | 360 | Promoter (<=1kb)                    | ENSG00000269899 | 569   |
| chr8 | 11703565 | 11703960 | 396 | Promoter (<=1kb)                    | ENSG00000269899 | 0     |
| chr8 | 11703843 | 11704238 | 396 | Promoter (<=1kb)                    | ENSG00000269899 | 0     |
| chr8 | 11704130 | 11704489 | 360 | Promoter (<=1kb)                    | ENSG00000269899 | -230  |
| chr8 | 11705500 | 11705859 | 360 | Promoter (1-2kb)                    | ENSG00000269899 | -1600 |
| chr8 | 16458144 | 16458539 | 396 | Distal Intergenic                   | ENSG00000253184 | -3225 |
| chr8 | 16988624 | 16989019 | 396 | Promoter (<=1kb)                    | ENSG00000249258 | 0     |
| chr8 | 16988863 | 16989258 | 396 | Promoter (<=1kb)                    | ENSG00000249258 | 173   |
| chr8 | 17556653 | 17557048 | 396 | Distal Intergenic                   | ENSG00000253168 | -4449 |
| chr8 | 17563804 | 17564163 | 360 | Promoter (2-3kb)                    | ENSG00000253168 | 2307  |
| chr8 | 17661585 | 17661980 | 396 | Promoter (2-3kb)                    | ENSG00000253944 | 2731  |
| chr8 | 17735437 | 17735832 | 396 | Distal Intergenic                   | ENSG00000253215 | -3720 |
| chr8 | 17735638 | 17736033 | 396 | Distal Intergenic                   | ENSG00000253215 | -3519 |
| chr8 | 17762423 | 17762818 | 396 | Promoter (<=1kb)                    | ENSG00000254054 | -447  |
| chr8 | 17763449 | 17763808 | 360 | Promoter (<=1kb)                    | ENSG00000254054 | 184   |
| chr8 | 17766135 | 17766530 | 396 | Promoter (2-3kb)                    | ENSG00000254054 | 2870  |
| chr8 | 17766157 | 17766516 | 360 | Promoter (2-3kb)                    | ENSG00000254054 | 2892  |
| chr8 | 17939891 | 17940286 | 396 | Promoter (2-3kb)                    | ENSG00000245281 | -2091 |
| chr8 | 18845292 | 18845651 | 360 | Promoter (1-2kb)                    | ENSG00000253335 | -1138 |
| chr8 | 19531006 | 19531365 | 360 | Distal Intergenic                   | ENSG00000253270 | -4718 |
| chr8 | 22129762 | 22130157 | 396 | Promoter (2-3kb)                    | ENSG00000254064 | 2518  |
| chr8 | 22129979 | 22130374 | 396 | Promoter (2-3kb)                    | ENSG00000254064 | 2301  |
| chr8 | 22403108 | 22403467 | 360 | Promoter (<=1kb)                    | ENSG00000251034 | -190  |
| chr8 | 22405112 | 22405507 | 396 | Promoter (2-3kb)                    | ENSG00000251034 | -2194 |
| chr8 | 22422629 | 22423024 | 396 | Promoter (1-2kb)                    | ENSG00000254230 | 1660  |
| chr8 | 22422843 | 22423238 | 396 | Promoter (1-2kb)                    | ENSG00000254230 | 1446  |
| chr8 | 22422852 | 22423211 | 360 | Promoter (1-2kb)                    | ENSG00000254230 | 1473  |
| chr8 | 22546539 | 22546934 | 396 | Promoter (<=1kb)                    | ENSG00000253125 | -729  |
| chr8 | 22548005 | 22548364 | 360 | Promoter (<=1kb)                    | ENSG00000253125 | 342   |
| chr8 | 22548891 | 22549250 | 360 | Promoter (1-2kb)                    | ENSG00000253125 | 1228  |
| chr8 | 22549102 | 22549461 | 360 | Promoter (1-2kb)                    | ENSG00000253125 | 1439  |
| chr8 | 22598314 | 22598673 | 360 | Intron (ENST000005:ENSG00000253125) | ENSG00000253125 | -3458 |
| chr8 | 22598518 | 22598913 | 396 | Intron (ENST000005:ENSG00000253125) | ENSG00000253125 | -3218 |
| chr8 | 22604367 | 22604726 | 360 | Promoter (<=1kb)                    | ENSG00000253125 | -290  |
| chr8 | 22604589 | 22604984 | 396 | Promoter (<=1kb)                    | ENSG00000253125 | -32   |
| chr8 | 22756088 | 22756483 | 396 | Promoter (<=1kb)                    | ENSG00000253142 | -762  |
| chr8 | 22757653 | 22758012 | 360 | Promoter (2-3kb)                    | ENSG00000253142 | -2327 |
| chr8 | 22879007 | 22879366 | 360 | Promoter (2-3kb)                    | ENSG00000245025 | -2159 |
| chr8 | 23084226 | 23084585 | 360 | Promoter (1-2kb)                    | ENSG00000246582 | 1079  |
| chr8 | 23084343 | 23084738 | 396 | Promoter (1-2kb)                    | ENSG00000246582 | 1196  |
| chr8 | 23188498 | 23188893 | 396 | Distal Intergenic                   | ENSG00000253837 | -4791 |
| chr8 | 23195640 | 23195999 | 360 | Promoter (1-2kb)                    | ENSG00000253837 | 1919  |
| chr8 | 23561831 | 23562226 | 396 | Promoter (2-3kb)                    | ENSG00000253471 | -2428 |
| chr8 | 23561924 | 23562283 | 360 | Promoter (2-3kb)                    | ENSG00000253471 | -2371 |
| chr8 | 25283711 | 25284070 | 360 | Promoter (<=1kb)                    | ENSG00000253476 | 26    |
| chr8 | 26279075 | 26279434 | 360 | Promoter (<=1kb)                    | ENSG00000253430 | -675  |
| chr8 | 28657173 | 28657568 | 396 | Promoter (1-2kb)                    | ENSG00000254034 | 1514  |
| chr8 | 29400754 | 29401149 | 396 | Distal Intergenic                   | ENSG00000253182 | -4539 |
| chr8 | 29722913 | 29723272 | 360 | Promoter (<=1kb)                    | ENSG00000254086 | 753   |

|      |          |          |     |                   |                 |       |
|------|----------|----------|-----|-------------------|-----------------|-------|
| chr8 | 30016016 | 30016411 | 396 | Promoter (2-3kb)  | ENSG00000271869 | -2268 |
| chr8 | 30451865 | 30452224 | 360 | Promoter (2-3kb)  | ENSG00000253112 | -2207 |
| chr8 | 30452098 | 30452457 | 360 | Promoter (1-2kb)  | ENSG00000253112 | -1974 |
| chr8 | 30456969 | 30457328 | 360 | Promoter (2-3kb)  | ENSG00000253112 | 2538  |
| chr8 | 30600782 | 30601177 | 396 | Promoter (<=1kb)  | ENSG00000104691 | -505  |
| chr8 | 30600792 | 30601151 | 360 | Promoter (<=1kb)  | ENSG00000104691 | -531  |
| chr8 | 30601007 | 30601366 | 360 | Promoter (<=1kb)  | ENSG00000104691 | -316  |
| chr8 | 30601044 | 30601439 | 396 | Promoter (<=1kb)  | ENSG00000104691 | -243  |
| chr8 | 37455401 | 37455796 | 396 | Promoter (<=1kb)  | ENSG00000254290 | 500   |
| chr8 | 37916167 | 37916562 | 396 | Distal Intergenic | ENSG00000260949 | -3837 |
| chr8 | 38134676 | 38135035 | 360 | Promoter (1-2kb)  | ENSG00000255487 | 1270  |
| chr8 | 38268403 | 38268762 | 360 | Promoter (2-3kb)  | ENSG00000272159 | -2143 |
| chr8 | 38268431 | 38268826 | 396 | Promoter (2-3kb)  | ENSG00000272159 | -2171 |
| chr8 | 38268711 | 38269070 | 360 | Promoter (2-3kb)  | ENSG00000272159 | -2451 |
| chr8 | 38269372 | 38269731 | 360 | Distal Intergenic | ENSG00000272159 | -3112 |
| chr8 | 38280228 | 38280587 | 360 | Promoter (<=1kb)  | ENSG00000255201 | 821   |
| chr8 | 38409533 | 38409892 | 360 | Promoter (<=1kb)  | ENSG00000253361 | 306   |
| chr8 | 38566966 | 38567325 | 360 | Distal Intergenic | ENSG00000254321 | -4593 |
| chr8 | 38659764 | 38660123 | 360 | Promoter (2-3kb)  | ENSG00000253586 | 2603  |
| chr8 | 38701793 | 38702188 | 396 | Promoter (1-2kb)  | ENSG00000253829 | 1769  |
| chr8 | 38701993 | 38702388 | 396 | Promoter (1-2kb)  | ENSG00000253829 | 1569  |
| chr8 | 38703494 | 38703853 | 360 | Promoter (<=1kb)  | ENSG00000253829 | 104   |
| chr8 | 40167379 | 40167774 | 396 | Promoter (1-2kb)  | ENSG00000253802 | 1006  |
| chr8 | 40167671 | 40168066 | 396 | Promoter (<=1kb)  | ENSG00000253802 | 714   |
| chr8 | 40171566 | 40171961 | 396 | Promoter (2-3kb)  | ENSG00000253802 | -2786 |
| chr8 | 41995118 | 41995477 | 360 | Promoter (1-2kb)  | ENSG00000271938 | 1793  |
| chr8 | 41995292 | 41995687 | 396 | Promoter (1-2kb)  | ENSG00000271938 | 1583  |
| chr8 | 41995319 | 41995678 | 360 | Promoter (1-2kb)  | ENSG00000271938 | 1592  |
| chr8 | 42009465 | 42009824 | 360 | Promoter (<=1kb)  | ENSG00000261449 | 457   |
| chr8 | 42013346 | 42013705 | 360 | Distal Intergenic | ENSG00000261449 | -3065 |
| chr8 | 42013545 | 42013904 | 360 | Distal Intergenic | ENSG00000261449 | -3264 |
| chr8 | 42391431 | 42391790 | 360 | Promoter (1-2kb)  | ENSG00000254165 | 1657  |
| chr8 | 42408063 | 42408422 | 360 | Promoter (1-2kb)  | ENSG00000272233 | -1511 |
| chr8 | 42412893 | 42413252 | 360 | Promoter (2-3kb)  | ENSG00000272233 | 2960  |
| chr8 | 42573845 | 42574240 | 396 | Promoter (2-3kb)  | ENSG00000255101 | 2849  |
| chr8 | 47733554 | 47733913 | 360 | Promoter (<=1kb)  | ENSG00000253314 | 0     |
| chr8 | 47736443 | 47736802 | 360 | Promoter (2-3kb)  | ENSG00000253314 | 2584  |
| chr8 | 47751345 | 47751704 | 360 | Promoter (<=1kb)  | ENSG00000253314 | -734  |
| chr8 | 47751568 | 47751927 | 360 | Promoter (<=1kb)  | ENSG00000253314 | -511  |
| chr8 | 52164923 | 52165318 | 396 | Distal Intergenic | ENSG00000253664 | -4930 |
| chr8 | 54438021 | 54438416 | 396 | Promoter (1-2kb)  | ENSG00000237807 | -1530 |
| chr8 | 57572498 | 57572857 | 360 | Distal Intergenic | ENSG00000254055 | -3474 |
| chr8 | 58172429 | 58172824 | 396 | Promoter (<=1kb)  | ENSG00000253614 | -961  |
| chr8 | 58172558 | 58172917 | 360 | Promoter (<=1kb)  | ENSG00000253614 | -868  |
| chr8 | 58658544 | 58658939 | 396 | Promoter (<=1kb)  | ENSG00000254139 | 0     |
| chr8 | 58658731 | 58659090 | 360 | Promoter (<=1kb)  | ENSG00000254139 | 23    |
| chr8 | 58659236 | 58659631 | 396 | Promoter (<=1kb)  | ENSG00000254139 | 528   |
| chr8 | 58716132 | 58716491 | 360 | Promoter (1-2kb)  | ENSG00000253322 | 1097  |
| chr8 | 60516877 | 60517272 | 396 | Promoter (2-3kb)  | ENSG00000253879 | 2914  |
| chr8 | 60961232 | 60961591 | 360 | Promoter (<=1kb)  | ENSG00000254775 | -555  |
| chr8 | 60963698 | 60964093 | 396 | Promoter (1-2kb)  | ENSG00000254775 | 1552  |
| chr8 | 61464705 | 61465064 | 360 | Promoter (<=1kb)  | ENSG00000255321 | 531   |
| chr8 | 61545037 | 61545396 | 360 | Promoter (<=1kb)  | ENSG00000228862 | 0     |
| chr8 | 65644666 | 65645061 | 396 | Promoter (1-2kb)  | ENSG00000254330 | 1955  |
| chr8 | 67027917 | 67028276 | 360 | Promoter (2-3kb)  | ENSG00000253190 | 2395  |
| chr8 | 67028116 | 67028475 | 360 | Promoter (2-3kb)  | ENSG00000253190 | 2594  |
| chr8 | 70745376 | 70745735 | 360 | Promoter (<=1kb)  | ENSG00000246528 | -611  |
| chr8 | 70745586 | 70745945 | 360 | Promoter (<=1kb)  | ENSG00000246528 | -401  |

|      |          |          |     |                     |                 |       |
|------|----------|----------|-----|---------------------|-----------------|-------|
| chr8 | 73371951 | 73372310 | 360 | Promoter (2-3kb)    | ENSG00000254347 | -2236 |
| chr8 | 73959059 | 73959418 | 360 | Distal Intergenic   | ENSG00000272254 | -3478 |
| chr8 | 73962819 | 73963178 | 360 | Promoter (1-2kb)    | ENSG00000253636 | -1235 |
| chr8 | 74329082 | 74329441 | 360 | Promoter (2-3kb)    | ENSG00000253302 | -2798 |
| chr8 | 75018547 | 75018906 | 360 | Promoter (2-3kb)    | ENSG00000253115 | 2796  |
| chr8 | 75546754 | 75547113 | 360 | Promoter (1-2kb)    | ENSG00000254080 | -1199 |
| chr8 | 75809585 | 75809944 | 360 | Promoter (1-2kb)    | ENSG00000254043 | -1048 |
| chr8 | 79515492 | 79515851 | 360 | Promoter (2-3kb)    | ENSG00000260398 | -2336 |
| chr8 | 80683154 | 80683513 | 360 | Promoter (2-3kb)    | ENSG00000272138 | 2777  |
| chr8 | 80868355 | 80868750 | 396 | Promoter (<=1kb)    | ENSG00000272518 | 866   |
| chr8 | 80874519 | 80874878 | 360 | Distal Intergenic   | ENSG00000272518 | -4903 |
| chr8 | 81029765 | 81030160 | 396 | Distal Intergenic   | ENSG00000254205 | -4927 |
| chr8 | 81036517 | 81036876 | 360 | Promoter (1-2kb)    | ENSG00000254205 | 1430  |
| chr8 | 90638545 | 90638940 | 396 | Intron (ENST000005) | ENSG00000251136 | -3112 |
| chr8 | 92918169 | 92918564 | 396 | Promoter (1-2kb)    | ENSG00000253901 | 1117  |
| chr8 | 92990344 | 92990703 | 360 | Promoter (2-3kb)    | ENSG00000253576 | 2208  |
| chr8 | 93519499 | 93519894 | 396 | Promoter (2-3kb)    | ENSG00000253371 | 2150  |
| chr8 | 93735087 | 93735482 | 396 | Promoter (1-2kb)    | ENSG00000254020 | 1857  |
| chr8 | 93739806 | 93740165 | 360 | Promoter (2-3kb)    | ENSG00000254020 | -2467 |
| chr8 | 93740528 | 93740923 | 396 | Intron (ENST000005) | ENSG00000254020 | -3189 |
| chr8 | 93741045 | 93741440 | 396 | Intron (ENST000005) | ENSG00000254020 | -3706 |
| chr8 | 94262218 | 94262613 | 396 | Promoter (<=1kb)    | ENSG00000246662 | 338   |
| chr8 | 94262238 | 94262597 | 360 | Promoter (<=1kb)    | ENSG00000246662 | 354   |
| chr8 | 94262417 | 94262812 | 396 | Promoter (<=1kb)    | ENSG00000246662 | 139   |
| chr8 | 94262473 | 94262832 | 360 | Promoter (<=1kb)    | ENSG00000246662 | 119   |
| chr8 | 94435042 | 94435437 | 396 | Promoter (1-2kb)    | ENSG00000246662 | -1934 |
| chr8 | 94859256 | 94859651 | 396 | Promoter (<=1kb)    | ENSG00000254057 | -285  |
| chr8 | 96443819 | 96444178 | 360 | Promoter (<=1kb)    | ENSG00000253773 | -687  |
| chr8 | 96443964 | 96444359 | 396 | Promoter (<=1kb)    | ENSG00000253773 | -506  |
| chr8 | 96444212 | 96444607 | 396 | Promoter (<=1kb)    | ENSG00000253773 | -258  |
| chr8 | 96444599 | 96444958 | 360 | Promoter (<=1kb)    | ENSG00000253773 | 0     |
| chr8 | 96445804 | 96446163 | 360 | Promoter (<=1kb)    | ENSG00000253773 | 939   |
| chr8 | 97150061 | 97150456 | 396 | Promoter (2-3kb)    | ENSG00000270131 | 2716  |
| chr8 | 97249003 | 97249398 | 396 | Promoter (1-2kb)    | ENSG00000254224 | 1348  |
| chr8 | 97250601 | 97250960 | 360 | Promoter (2-3kb)    | ENSG00000254224 | 2946  |
| chr8 | 98154099 | 98154458 | 360 | Promoter (1-2kb)    | ENSG00000270077 | -1940 |
| chr8 | 1E+08    | 1E+08    | 396 | Promoter (1-2kb)    | ENSG00000253948 | -1113 |
| chr8 | 1.02E+08 | 1.02E+08 | 360 | Promoter (<=1kb)    | ENSG00000271882 | 12    |
| chr8 | 1.03E+08 | 1.03E+08 | 360 | Promoter (<=1kb)    | ENSG00000246263 | 972   |
| chr8 | 1.06E+08 | 1.06E+08 | 396 | Promoter (2-3kb)    | ENSG00000254041 | -2456 |
| chr8 | 1.1E+08  | 1.1E+08  | 360 | Promoter (<=1kb)    | ENSG00000253949 | -484  |
| chr8 | 1.1E+08  | 1.1E+08  | 396 | Promoter (<=1kb)    | ENSG00000253949 | 72    |
| chr8 | 1.1E+08  | 1.1E+08  | 360 | Promoter (<=1kb)    | ENSG00000253949 | 187   |
| chr8 | 1.1E+08  | 1.1E+08  | 396 | Promoter (<=1kb)    | ENSG00000253949 | 271   |
| chr8 | 1.18E+08 | 1.18E+08 | 360 | Promoter (<=1kb)    | ENSG00000253327 | -766  |
| chr8 | 1.18E+08 | 1.18E+08 | 396 | Promoter (<=1kb)    | ENSG00000253327 | -578  |
| chr8 | 1.18E+08 | 1.18E+08 | 360 | Promoter (1-2kb)    | ENSG00000253327 | 1855  |
| chr8 | 1.2E+08  | 1.2E+08  | 396 | Promoter (1-2kb)    | ENSG00000253398 | 1977  |
| chr8 | 1.21E+08 | 1.21E+08 | 396 | Promoter (1-2kb)    | ENSG00000254343 | 1442  |
| chr8 | 1.23E+08 | 1.23E+08 | 396 | Promoter (<=1kb)    | ENSG00000254209 | 362   |
| chr8 | 1.23E+08 | 1.23E+08 | 360 | Promoter (<=1kb)    | ENSG00000254018 | 768   |
| chr8 | 1.24E+08 | 1.24E+08 | 360 | Distal Intergenic   | ENSG00000255325 | -4145 |
| chr8 | 1.24E+08 | 1.24E+08 | 396 | Promoter (2-3kb)    | ENSG00000263443 | 2251  |
| chr8 | 1.24E+08 | 1.24E+08 | 360 | Promoter (1-2kb)    | ENSG00000263443 | -1240 |
| chr8 | 1.24E+08 | 1.24E+08 | 396 | Distal Intergenic   | ENSG00000263443 | -4434 |
| chr8 | 1.24E+08 | 1.24E+08 | 396 | Promoter (1-2kb)    | ENSG00000272043 | -1533 |
| chr8 | 1.25E+08 | 1.25E+08 | 360 | Promoter (<=1kb)    | ENSG00000254113 | 345   |
| chr8 | 1.25E+08 | 1.25E+08 | 360 | Promoter (1-2kb)    | ENSG00000253286 | -1971 |



|      |          |          |     |                      |                 |       |
|------|----------|----------|-----|----------------------|-----------------|-------|
| chr8 | 1.25E+08 | 1.25E+08 | 360 | Promoter (<=1kb)     | ENSG00000254000 | 121   |
| chr8 | 1.25E+08 | 1.25E+08 | 360 | Promoter (2-3kb)     | ENSG00000254249 | 2949  |
| chr8 | 1.25E+08 | 1.25E+08 | 396 | Distal Intergenic    | ENSG00000271975 | -4715 |
| chr8 | 1.26E+08 | 1.26E+08 | 360 | Intron (ENST000005:) | ENSG00000255080 | -4958 |
| chr8 | 1.26E+08 | 1.26E+08 | 396 | Promoter (1-2kb)     | ENSG00000253513 | -1154 |
| chr8 | 1.27E+08 | 1.27E+08 | 396 | Intron (ENST000005:) | ENSG00000253111 | -3176 |
| chr8 | 1.27E+08 | 1.27E+08 | 396 | Promoter (2-3kb)     | ENSG00000253111 | -2967 |
| chr8 | 1.28E+08 | 1.28E+08 | 396 | Promoter (<=1kb)     | ENSG00000253573 | 938   |
| chr8 | 1.28E+08 | 1.28E+08 | 360 | Promoter (2-3kb)     | ENSG00000253438 | 2053  |
| chr8 | 1.28E+08 | 1.28E+08 | 360 | Promoter (<=1kb)     | ENSG00000246228 | 998   |
| chr8 | 1.28E+08 | 1.28E+08 | 396 | Promoter (1-2kb)     | ENSG00000246228 | 1683  |
| chr8 | 1.28E+08 | 1.28E+08 | 396 | Promoter (1-2kb)     | ENSG00000246228 | 1366  |
| chr8 | 1.3E+08  | 1.3E+08  | 360 | Promoter (2-3kb)     | ENSG00000253926 | 2185  |
| chr8 | 1.32E+08 | 1.32E+08 | 360 | Promoter (1-2kb)     | ENSG00000253259 | 1332  |
| chr8 | 1.34E+08 | 1.34E+08 | 360 | Promoter (2-3kb)     | ENSG00000253521 | 2345  |
| chr8 | 1.34E+08 | 1.34E+08 | 396 | Promoter (1-2kb)     | ENSG00000253521 | 1256  |
| chr8 | 1.34E+08 | 1.34E+08 | 360 | Promoter (1-2kb)     | ENSG00000253521 | 1239  |
| chr8 | 1.34E+08 | 1.34E+08 | 396 | Promoter (1-2kb)     | ENSG00000253521 | 1022  |
| chr8 | 1.35E+08 | 1.35E+08 | 396 | Intron (ENST000005:) | ENSG00000253165 | -4565 |
| chr8 | 1.4E+08  | 1.4E+08  | 396 | Distal Intergenic    | ENSG00000253432 | -4858 |
| chr8 | 1.4E+08  | 1.4E+08  | 396 | Promoter (2-3kb)     | ENSG00000254258 | 2964  |
| chr8 | 1.4E+08  | 1.4E+08  | 360 | Distal Intergenic    | ENSG00000254258 | -4704 |
| chr8 | 1.41E+08 | 1.41E+08 | 396 | Promoter (2-3kb)     | ENSG00000253574 | -2300 |
| chr8 | 1.41E+08 | 1.41E+08 | 360 | Promoter (2-3kb)     | ENSG00000253574 | -2189 |
| chr8 | 1.41E+08 | 1.41E+08 | 396 | Promoter (1-2kb)     | ENSG00000253574 | -1175 |
| chr8 | 1.42E+08 | 1.42E+08 | 396 | Promoter (1-2kb)     | ENSG00000259891 | 1714  |
| chr8 | 1.42E+08 | 1.42E+08 | 360 | Promoter (2-3kb)     | ENSG00000244998 | 2953  |
| chr8 | 1.42E+08 | 1.42E+08 | 396 | Promoter (<=1kb)     | ENSG00000244998 | 0     |
| chr8 | 1.42E+08 | 1.42E+08 | 396 | Promoter (<=1kb)     | ENSG00000244998 | 0     |
| chr8 | 1.42E+08 | 1.42E+08 | 360 | Promoter (1-2kb)     | ENSG00000244998 | -1180 |
| chr8 | 1.43E+08 | 1.43E+08 | 396 | Promoter (2-3kb)     | ENSG00000254008 | -2869 |
| chr8 | 1.43E+08 | 1.43E+08 | 360 | Promoter (2-3kb)     | ENSG00000254008 | -2813 |
| chr8 | 1.43E+08 | 1.43E+08 | 360 | Promoter (<=1kb)     | ENSG00000254008 | -534  |
| chr8 | 1.43E+08 | 1.43E+08 | 396 | Promoter (<=1kb)     | ENSG00000254008 | -495  |
| chr8 | 1.43E+08 | 1.43E+08 | 360 | Promoter (1-2kb)     | ENSG00000254008 | 1907  |
| chr8 | 1.44E+08 | 1.44E+08 | 396 | Promoter (1-2kb)     | ENSG00000261044 | -1462 |
| chr8 | 1.44E+08 | 1.44E+08 | 360 | Distal Intergenic    | ENSG00000253806 | -3794 |
| chr8 | 1.44E+08 | 1.44E+08 | 396 | Promoter (<=1kb)     | ENSG00000253196 | -250  |
| chr8 | 1.44E+08 | 1.44E+08 | 360 | Promoter (<=1kb)     | ENSG00000253196 | -98   |
| chr8 | 1.44E+08 | 1.44E+08 | 396 | Promoter (1-2kb)     | ENSG00000253196 | 1640  |
| chr8 | 1.44E+08 | 1.44E+08 | 396 | Promoter (2-3kb)     | ENSG00000253196 | 2203  |
| chr8 | 1.44E+08 | 1.44E+08 | 360 | Promoter (<=1kb)     | ENSG00000247317 | -658  |
| chr8 | 1.44E+08 | 1.44E+08 | 396 | Distal Intergenic    | ENSG00000247317 | -3122 |
| chr8 | 1.44E+08 | 1.44E+08 | 360 | Distal Intergenic    | ENSG00000247317 | -3568 |
| chr8 | 1.44E+08 | 1.44E+08 | 360 | Distal Intergenic    | ENSG00000247317 | -3770 |
| chr8 | 1.44E+08 | 1.44E+08 | 360 | Distal Intergenic    | ENSG00000247317 | -4031 |
| chr8 | 1.44E+08 | 1.44E+08 | 396 | Distal Intergenic    | ENSG00000247317 | -4054 |
| chr8 | 1.44E+08 | 1.44E+08 | 396 | Distal Intergenic    | ENSG00000247317 | -4552 |
| chr8 | 1.44E+08 | 1.44E+08 | 360 | Distal Intergenic    | ENSG00000247317 | -4840 |
| chr8 | 1.44E+08 | 1.44E+08 | 360 | Promoter (<=1kb)     | ENSG00000253716 | 698   |
| chr8 | 1.44E+08 | 1.44E+08 | 360 | Promoter (<=1kb)     | ENSG00000272172 | -659  |
| chr8 | 1.44E+08 | 1.44E+08 | 396 | Promoter (<=1kb)     | ENSG00000272172 | -895  |
| chr8 | 1.44E+08 | 1.44E+08 | 396 | Promoter (2-3kb)     | ENSG00000254389 | -2998 |
| chr8 | 1.44E+08 | 1.44E+08 | 396 | Distal Intergenic    | ENSG00000254389 | -4325 |
| chr8 | 1.44E+08 | 1.44E+08 | 360 | Distal Intergenic    | ENSG00000254389 | -4456 |
| chr8 | 1.44E+08 | 1.44E+08 | 360 | Distal Intergenic    | ENSG00000254389 | -4655 |
| chr8 | 1.45E+08 | 1.45E+08 | 360 | Promoter (<=1kb)     | ENSG00000271912 | 623   |
| chr8 | 1.45E+08 | 1.45E+08 | 360 | Promoter (2-3kb)     | ENSG00000271912 | 2831  |

|      |          |          |     |                   |                 |       |
|------|----------|----------|-----|-------------------|-----------------|-------|
| chr8 | 1.45E+08 | 1.45E+08 | 396 | Promoter (2-3kb)  | ENSG00000254574 | 2874  |
| chr8 | 1.45E+08 | 1.45E+08 | 360 | Promoter (2-3kb)  | ENSG00000254574 | 2829  |
| chr8 | 1.45E+08 | 1.45E+08 | 360 | Promoter (2-3kb)  | ENSG00000254574 | -2447 |
| chr8 | 1.45E+08 | 1.45E+08 | 360 | Promoter (1-2kb)  | ENSG00000254548 | 1724  |
| chr8 | 1.45E+08 | 1.45E+08 | 360 | Promoter (1-2kb)  | ENSG00000254548 | 1521  |
| chr8 | 1.45E+08 | 1.45E+08 | 396 | Promoter (1-2kb)  | ENSG00000254548 | 1417  |
| chr8 | 1.45E+08 | 1.45E+08 | 360 | Promoter (<=1kb)  | ENSG00000254548 | -674  |
| chr8 | 1.45E+08 | 1.45E+08 | 360 | Distal Intergenic | ENSG00000254548 | -3678 |
| chr8 | 1.45E+08 | 1.45E+08 | 360 | Distal Intergenic | ENSG00000254548 | -3896 |
| chr8 | 1.45E+08 | 1.45E+08 | 360 | Promoter (<=1kb)  | ENSG00000203499 | -747  |
| chr8 | 1.45E+08 | 1.45E+08 | 360 | Promoter (2-3kb)  | ENSG00000203499 | 2375  |
| chr8 | 1.45E+08 | 1.45E+08 | 396 | Promoter (2-3kb)  | ENSG00000203499 | 2441  |
| chr8 | 1.45E+08 | 1.45E+08 | 360 | Promoter (<=1kb)  | ENSG00000254973 | 966   |
| chr8 | 1.45E+08 | 1.45E+08 | 360 | Promoter (<=1kb)  | ENSG00000254973 | 99    |
| chr8 | 1.45E+08 | 1.45E+08 | 360 | Distal Intergenic | ENSG00000254973 | -4862 |
| chr9 | 464433   | 464792   | 360 | Promoter (1-2kb)  | ENSG00000227155 | 1273  |
| chr9 | 469519   | 469878   | 360 | Promoter (<=1kb)  | ENSG00000227155 | 0     |
| chr9 | 490158   | 490553   | 396 | Promoter (1-2kb)  | ENSG00000227155 | 1559  |
| chr9 | 674830   | 675225   | 396 | Promoter (2-3kb)  | ENSG00000227914 | 2403  |
| chr9 | 676406   | 676801   | 396 | Promoter (<=1kb)  | ENSG00000227914 | 827   |
| chr9 | 677078   | 677473   | 396 | Promoter (<=1kb)  | ENSG00000227914 | 155   |
| chr9 | 677867   | 678226   | 360 | Promoter (<=1kb)  | ENSG00000227914 | -239  |
| chr9 | 678093   | 678452   | 360 | Promoter (<=1kb)  | ENSG00000227914 | -465  |
| chr9 | 682709   | 683104   | 396 | Promoter (2-3kb)  | ENSG00000227914 | 2451  |
| chr9 | 682737   | 683096   | 360 | Promoter (2-3kb)  | ENSG00000227914 | 2459  |
| chr9 | 683665   | 684024   | 360 | Promoter (1-2kb)  | ENSG00000227914 | 1531  |
| chr9 | 686713   | 687072   | 360 | Promoter (1-2kb)  | ENSG00000227914 | -1158 |
| chr9 | 686925   | 687284   | 360 | Promoter (1-2kb)  | ENSG00000227914 | -1370 |
| chr9 | 2621106  | 2621501  | 396 | Promoter (<=1kb)  | ENSG00000236404 | 0     |
| chr9 | 3177086  | 3177481  | 396 | Distal Intergenic | ENSG00000236511 | -4108 |
| chr9 | 3177366  | 3177761  | 396 | Distal Intergenic | ENSG00000236511 | -3828 |
| chr9 | 3181531  | 3181890  | 360 | Promoter (<=1kb)  | ENSG00000236511 | 0     |
| chr9 | 3181736  | 3182095  | 360 | Promoter (<=1kb)  | ENSG00000236511 | 147   |
| chr9 | 3182050  | 3182409  | 360 | Promoter (<=1kb)  | ENSG00000236511 | 461   |
| chr9 | 3526489  | 3526884  | 396 | Promoter (<=1kb)  | ENSG00000232104 | 0     |
| chr9 | 3526533  | 3526892  | 360 | Promoter (<=1kb)  | ENSG00000232104 | 0     |
| chr9 | 3527251  | 3527610  | 360 | Promoter (<=1kb)  | ENSG00000232104 | 528   |
| chr9 | 3646437  | 3646796  | 360 | Promoter (<=1kb)  | ENSG00000237359 | -539  |
| chr9 | 4297869  | 4298264  | 396 | Promoter (1-2kb)  | ENSG00000228322 | -1126 |
| chr9 | 4298345  | 4298704  | 360 | Promoter (<=1kb)  | ENSG00000228322 | -686  |
| chr9 | 4678249  | 4678644  | 396 | Promoter (<=1kb)  | ENSG00000273061 | 827   |
| chr9 | 4679273  | 4679668  | 396 | Promoter (<=1kb)  | ENSG00000273061 | 0     |
| chr9 | 4679423  | 4679782  | 360 | Promoter (<=1kb)  | ENSG00000273061 | 0     |
| chr9 | 4679550  | 4679945  | 396 | Promoter (<=1kb)  | ENSG00000273061 | -48   |
| chr9 | 4679625  | 4679984  | 360 | Promoter (<=1kb)  | ENSG00000273061 | -123  |
| chr9 | 4680646  | 4681005  | 360 | Promoter (1-2kb)  | ENSG00000273061 | -1144 |
| chr9 | 4849040  | 4849399  | 360 | Promoter (<=1kb)  | ENSG00000228165 | 974   |
| chr9 | 5721393  | 5721752  | 360 | Promoter (1-2kb)  | ENSG00000225408 | -1149 |
| chr9 | 5724350  | 5724745  | 396 | Distal Intergenic | ENSG00000225408 | -4106 |
| chr9 | 6643008  | 6643403  | 396 | Promoter (2-3kb)  | ENSG00000236924 | -2553 |
| chr9 | 6644756  | 6645151  | 396 | Promoter (<=1kb)  | ENSG00000236924 | -805  |
| chr9 | 6645682  | 6646077  | 396 | Promoter (<=1kb)  | ENSG00000236924 | 0     |
| chr9 | 6703995  | 6704390  | 396 | Promoter (<=1kb)  | ENSG00000229611 | -81   |
| chr9 | 6704096  | 6704455  | 360 | Promoter (<=1kb)  | ENSG00000229611 | -16   |
| chr9 | 6704315  | 6704674  | 360 | Promoter (<=1kb)  | ENSG00000229611 | 0     |
| chr9 | 6715515  | 6715910  | 396 | Promoter (<=1kb)  | ENSG00000225489 | -638  |
| chr9 | 6715901  | 6716260  | 360 | Promoter (<=1kb)  | ENSG00000225489 | -288  |
| chr9 | 6897803  | 6898198  | 396 | Distal Intergenic | ENSG00000224972 | -4472 |

|      |          |          |     |                   |                 |       |
|------|----------|----------|-----|-------------------|-----------------|-------|
| chr9 | 6899528  | 6899923  | 396 | Promoter (2-3kb)  | ENSG00000224972 | -2747 |
| chr9 | 6900328  | 6900687  | 360 | Promoter (1-2kb)  | ENSG00000224972 | -1983 |
| chr9 | 6900548  | 6900907  | 360 | Promoter (1-2kb)  | ENSG00000224972 | -1763 |
| chr9 | 6901084  | 6901479  | 396 | Promoter (1-2kb)  | ENSG00000224972 | -1191 |
| chr9 | 6901292  | 6901687  | 396 | Promoter (<=1kb)  | ENSG00000224972 | -983  |
| chr9 | 7785660  | 7786055  | 396 | Promoter (<=1kb)  | ENSG00000273056 | 633   |
| chr9 | 11275253 | 11275648 | 396 | Promoter (<=1kb)  | ENSG00000230365 | 666   |
| chr9 | 13278142 | 13278537 | 396 | Promoter (<=1kb)  | ENSG00000234740 | 649   |
| chr9 | 14313868 | 14314263 | 396 | Promoter (2-3kb)  | ENSG00000225472 | -2821 |
| chr9 | 14316267 | 14316626 | 360 | Promoter (<=1kb)  | ENSG00000225472 | -458  |
| chr9 | 14318570 | 14318965 | 396 | Promoter (1-2kb)  | ENSG00000225472 | 1486  |
| chr9 | 20684099 | 20684494 | 396 | Promoter (<=1kb)  | ENSG00000227071 | -162  |
| chr9 | 20684255 | 20684614 | 360 | Promoter (<=1kb)  | ENSG00000227071 | 73    |
| chr9 | 20684426 | 20684821 | 396 | Promoter (<=1kb)  | ENSG00000227071 | 0     |
| chr9 | 20684482 | 20684841 | 360 | Promoter (<=1kb)  | ENSG00000227071 | 0     |
| chr9 | 21860258 | 21860617 | 360 | Promoter (1-2kb)  | ENSG00000265194 | 1308  |
| chr9 | 21863298 | 21863693 | 396 | Promoter (1-2kb)  | ENSG00000265194 | -1373 |
| chr9 | 24542405 | 24542800 | 396 | Distal Intergenic | ENSG00000269957 | -3150 |
| chr9 | 26748450 | 26748845 | 396 | Promoter (1-2kb)  | ENSG00000254261 | 1499  |
| chr9 | 26748591 | 26748950 | 360 | Promoter (1-2kb)  | ENSG00000254261 | 1640  |
| chr9 | 26799270 | 26799629 | 360 | Promoter (2-3kb)  | ENSG00000253400 | -2102 |
| chr9 | 26958012 | 26958371 | 360 | Promoter (1-2kb)  | ENSG00000234676 | -1719 |
| chr9 | 32550814 | 32551209 | 396 | Promoter (<=1kb)  | ENSG00000235453 | 0     |
| chr9 | 32551037 | 32551396 | 360 | Promoter (<=1kb)  | ENSG00000235453 | 0     |
| chr9 | 32551546 | 32551941 | 396 | Promoter (<=1kb)  | ENSG00000235453 | 0     |
| chr9 | 32551606 | 32551965 | 360 | Promoter (<=1kb)  | ENSG00000235453 | 0     |
| chr9 | 32552312 | 32552707 | 396 | Promoter (<=1kb)  | ENSG00000235453 | 0     |
| chr9 | 32552570 | 32552965 | 396 | Promoter (<=1kb)  | ENSG00000235453 | 224   |
| chr9 | 32552686 | 32553045 | 360 | Promoter (<=1kb)  | ENSG00000235453 | 340   |
| chr9 | 32629409 | 32629804 | 396 | Distal Intergenic | ENSG00000223440 | -3648 |
| chr9 | 33163335 | 33163730 | 396 | Distal Intergenic | ENSG00000233554 | -3243 |
| chr9 | 33166942 | 33167301 | 360 | Promoter (<=1kb)  | ENSG00000233554 | 0     |
| chr9 | 33167379 | 33167774 | 396 | Promoter (<=1kb)  | ENSG00000233554 | 406   |
| chr9 | 33167580 | 33167939 | 360 | Promoter (<=1kb)  | ENSG00000233554 | 607   |
| chr9 | 33167588 | 33167983 | 396 | Promoter (<=1kb)  | ENSG00000233554 | 615   |
| chr9 | 33167845 | 33168240 | 396 | Promoter (<=1kb)  | ENSG00000233554 | 872   |
| chr9 | 33167874 | 33168233 | 360 | Promoter (<=1kb)  | ENSG00000233554 | 901   |
| chr9 | 33720079 | 33720438 | 360 | Promoter (<=1kb)  | ENSG00000227301 | 391   |
| chr9 | 33721353 | 33721712 | 360 | Promoter (1-2kb)  | ENSG00000227301 | 1665  |
| chr9 | 33722056 | 33722415 | 360 | Promoter (2-3kb)  | ENSG00000227301 | 2368  |
| chr9 | 33722063 | 33722458 | 396 | Promoter (2-3kb)  | ENSG00000227301 | 2375  |
| chr9 | 33816401 | 33816760 | 360 | Promoter (2-3kb)  | ENSG00000235481 | 2033  |
| chr9 | 33816535 | 33816930 | 396 | Promoter (1-2kb)  | ENSG00000235481 | 1863  |
| chr9 | 33816604 | 33816963 | 360 | Promoter (1-2kb)  | ENSG00000235481 | 1830  |
| chr9 | 33818120 | 33818479 | 360 | Promoter (<=1kb)  | ENSG00000235481 | 314   |
| chr9 | 33818319 | 33818678 | 360 | Promoter (<=1kb)  | ENSG00000235481 | 115   |
| chr9 | 33912447 | 33912842 | 396 | Promoter (1-2kb)  | ENSG00000230925 | -1327 |
| chr9 | 34522298 | 34522657 | 360 | Promoter (<=1kb)  | ENSG00000230729 | 773   |
| chr9 | 34522499 | 34522858 | 360 | Promoter (<=1kb)  | ENSG00000230729 | 974   |
| chr9 | 34663888 | 34664283 | 396 | Promoter (1-2kb)  | ENSG00000230074 | -1379 |
| chr9 | 34666177 | 34666536 | 360 | Promoter (<=1kb)  | ENSG00000261215 | -151  |
| chr9 | 34666463 | 34666822 | 360 | Promoter (<=1kb)  | ENSG00000261215 | -437  |
| chr9 | 35095870 | 35096265 | 396 | Promoter (<=1kb)  | ENSG00000234181 | -110  |
| chr9 | 35096191 | 35096550 | 360 | Promoter (<=1kb)  | ENSG00000234181 | 0     |
| chr9 | 35096391 | 35096750 | 360 | Promoter (<=1kb)  | ENSG00000234181 | 16    |
| chr9 | 35096405 | 35096800 | 396 | Promoter (<=1kb)  | ENSG00000234181 | 30    |
| chr9 | 35646562 | 35646957 | 396 | Promoter (<=1kb)  | ENSG00000227933 | 295   |
| chr9 | 35646683 | 35647042 | 360 | Promoter (<=1kb)  | ENSG00000227933 | 416   |

|      |          |          |     |                     |                 |       |
|------|----------|----------|-----|---------------------|-----------------|-------|
| chr9 | 35646998 | 35647357 | 360 | Promoter (<=1kb)    | ENSG00000227933 | 731   |
| chr9 | 35656427 | 35656822 | 396 | Promoter (1-2kb)    | ENSG00000269900 | 1192  |
| chr9 | 35656433 | 35656792 | 360 | Promoter (1-2kb)    | ENSG00000269900 | 1222  |
| chr9 | 35657694 | 35658089 | 396 | Promoter (<=1kb)    | ENSG00000269900 | 0     |
| chr9 | 35657742 | 35658101 | 360 | Promoter (<=1kb)    | ENSG00000269900 | 0     |
| chr9 | 35658474 | 35658833 | 360 | Promoter (<=1kb)    | ENSG00000269900 | -459  |
| chr9 | 35658941 | 35659336 | 396 | Promoter (<=1kb)    | ENSG00000269900 | -926  |
| chr9 | 35756829 | 35757224 | 396 | Promoter (<=1kb)    | ENSG00000228843 | 713   |
| chr9 | 35907158 | 35907517 | 360 | Promoter (1-2kb)    | ENSG00000235387 | -1963 |
| chr9 | 37076994 | 37077389 | 396 | Promoter (1-2kb)    | ENSG00000232920 | -1205 |
| chr9 | 37079313 | 37079672 | 360 | Promoter (<=1kb)    | ENSG00000260100 | 101   |
| chr9 | 37079337 | 37079732 | 396 | Promoter (<=1kb)    | ENSG00000260100 | 41    |
| chr9 | 37079930 | 37080325 | 396 | Promoter (<=1kb)    | ENSG00000233137 | 0     |
| chr9 | 37119898 | 37120293 | 396 | Distal Intergenic   | ENSG00000233242 | -4411 |
| chr9 | 37120091 | 37120450 | 360 | Distal Intergenic   | ENSG00000233242 | -4604 |
| chr9 | 37384545 | 37384904 | 360 | Promoter (<=1kb)    | ENSG00000224648 | -114  |
| chr9 | 42470811 | 42471170 | 360 | Promoter (<=1kb)    | ENSG00000223839 | 311   |
| chr9 | 69178160 | 69178555 | 396 | Promoter (<=1kb)    | ENSG00000240907 | 903   |
| chr9 | 69178243 | 69178602 | 360 | Promoter (<=1kb)    | ENSG00000240907 | 856   |
| chr9 | 72043621 | 72044016 | 396 | Promoter (<=1kb)    | ENSG00000243888 | 0     |
| chr9 | 72043882 | 72044277 | 396 | Promoter (<=1kb)    | ENSG00000243888 | -245  |
| chr9 | 72046572 | 72046931 | 360 | Promoter (2-3kb)    | ENSG00000243888 | -2935 |
| chr9 | 72777077 | 72777436 | 360 | Intron (ENST000005) | ENSG00000204706 | -4621 |
| chr9 | 72788379 | 72788774 | 396 | Promoter (<=1kb)    | ENSG00000204706 | -575  |
| chr9 | 72789340 | 72789699 | 360 | Promoter (1-2kb)    | ENSG00000204706 | 1049  |
| chr9 | 77563828 | 77564223 | 396 | Distal Intergenic   | ENSG00000203321 | -3661 |
| chr9 | 86318541 | 86318900 | 360 | Distal Intergenic   | ENSG00000254473 | -3609 |
| chr9 | 86318568 | 86318963 | 396 | Distal Intergenic   | ENSG00000254473 | -3546 |
| chr9 | 89559921 | 89560316 | 396 | Distal Intergenic   | ENSG00000226237 | -3298 |
| chr9 | 89561499 | 89561894 | 396 | Promoter (1-2kb)    | ENSG00000226237 | -1720 |
| chr9 | 92808672 | 92809067 | 396 | Distal Intergenic   | ENSG00000227555 | -4891 |
| chr9 | 93233254 | 93233649 | 396 | Intron (ENST000004) | ENSG00000229613 | -4027 |
| chr9 | 94899891 | 94900250 | 360 | Distal Intergenic   | ENSG00000225511 | -3330 |
| chr9 | 94899902 | 94900297 | 396 | Distal Intergenic   | ENSG00000225511 | -3283 |
| chr9 | 94900137 | 94900532 | 396 | Distal Intergenic   | ENSG00000225511 | -3048 |
| chr9 | 94900144 | 94900503 | 360 | Distal Intergenic   | ENSG00000225511 | -3077 |
| chr9 | 94911794 | 94912153 | 360 | Promoter (1-2kb)    | ENSG00000225511 | 1800  |
| chr9 | 94911997 | 94912356 | 360 | Promoter (2-3kb)    | ENSG00000225511 | 2003  |
| chr9 | 94922603 | 94922962 | 360 | Promoter (2-3kb)    | ENSG00000236717 | -2876 |
| chr9 | 96618423 | 96618818 | 396 | Promoter (<=1kb)    | ENSG00000231990 | -547  |
| chr9 | 96618640 | 96619035 | 396 | Promoter (<=1kb)    | ENSG00000231990 | -330  |
| chr9 | 97696389 | 97696748 | 360 | Promoter (<=1kb)    | ENSG00000224764 | 480   |
| chr9 | 97696761 | 97697156 | 396 | Promoter (<=1kb)    | ENSG00000224764 | 72    |
| chr9 | 97697005 | 97697400 | 396 | Promoter (<=1kb)    | ENSG00000224764 | 0     |
| chr9 | 98174832 | 98175191 | 360 | Downstream (1-2kb)  | ENSG00000271384 | -4888 |
| chr9 | 98192145 | 98192540 | 396 | Distal Intergenic   | ENSG00000237857 | -3067 |
| chr9 | 98192963 | 98193358 | 396 | Distal Intergenic   | ENSG00000237857 | -3885 |
| chr9 | 98255798 | 98256193 | 396 | Promoter (1-2kb)    | ENSG00000271314 | -1013 |
| chr9 | 98256032 | 98256427 | 396 | Promoter (<=1kb)    | ENSG00000271314 | -779  |
| chr9 | 98256329 | 98256724 | 396 | Promoter (<=1kb)    | ENSG00000271314 | -482  |
| chr9 | 98263765 | 98264160 | 396 | Distal Intergenic   | ENSG00000271155 | -4357 |
| chr9 | 98368578 | 98368937 | 360 | Promoter (<=1kb)    | ENSG00000229345 | -10   |
| chr9 | 98414134 | 98414529 | 396 | Promoter (1-2kb)    | ENSG00000228142 | 1690  |
| chr9 | 1E+08    | 1E+08    | 360 | Promoter (2-3kb)    | ENSG00000231521 | 2947  |
| chr9 | 1.01E+08 | 1.01E+08 | 396 | Distal Intergenic   | ENSG00000260677 | -4677 |
| chr9 | 1.09E+08 | 1.09E+08 | 396 | Distal Intergenic   | ENSG00000234323 | -4441 |
| chr9 | 1.1E+08  | 1.1E+08  | 360 | Promoter (2-3kb)    | ENSG00000230782 | -2622 |
| chr9 | 1.1E+08  | 1.1E+08  | 396 | Promoter (<=1kb)    | ENSG00000226047 | 313   |

|      |          |          |     |                     |                 |       |
|------|----------|----------|-----|---------------------|-----------------|-------|
| chr9 | 1.1E+08  | 1.1E+08  | 396 | Promoter (<=1kb)    | ENSG00000226825 | 762   |
| chr9 | 1.1E+08  | 1.1E+08  | 396 | Promoter (<=1kb)    | ENSG00000226825 | 525   |
| chr9 | 1.1E+08  | 1.1E+08  | 396 | Promoter (1-2kb)    | ENSG00000226825 | -1194 |
| chr9 | 1.1E+08  | 1.1E+08  | 360 | Promoter (1-2kb)    | ENSG00000226825 | -1279 |
| chr9 | 1.1E+08  | 1.1E+08  | 360 | Promoter (1-2kb)    | ENSG00000226825 | -1597 |
| chr9 | 1.1E+08  | 1.1E+08  | 360 | Promoter (2-3kb)    | ENSG00000226825 | -2894 |
| chr9 | 1.14E+08 | 1.14E+08 | 360 | Promoter (2-3kb)    | ENSG00000224644 | 2705  |
| chr9 | 1.16E+08 | 1.16E+08 | 360 | Promoter (2-3kb)    | ENSG00000237073 | -2933 |
| chr9 | 1.21E+08 | 1.21E+08 | 396 | Promoter (1-2kb)    | ENSG00000228512 | 1002  |
| chr9 | 1.21E+08 | 1.21E+08 | 360 | Promoter (<=1kb)    | ENSG00000231901 | -795  |
| chr9 | 1.21E+08 | 1.21E+08 | 396 | Promoter (2-3kb)    | ENSG00000235201 | -2928 |
| chr9 | 1.22E+08 | 1.22E+08 | 360 | Promoter (2-3kb)    | ENSG00000235201 | -2472 |
| chr9 | 1.25E+08 | 1.25E+08 | 360 | Promoter (1-2kb)    | ENSG00000234156 | 1196  |
| chr9 | 1.25E+08 | 1.25E+08 | 396 | Promoter (2-3kb)    | ENSG00000234156 | 2517  |
| chr9 | 1.25E+08 | 1.25E+08 | 360 | Promoter (2-3kb)    | ENSG00000234156 | 2531  |
| chr9 | 1.25E+08 | 1.25E+08 | 396 | Promoter (<=1kb)    | ENSG00000234156 | 428   |
| chr9 | 1.26E+08 | 1.26E+08 | 360 | Promoter (<=1kb)    | ENSG00000261094 | -486  |
| chr9 | 1.27E+08 | 1.27E+08 | 360 | Distal Intergenic   | ENSG00000224020 | -4363 |
| chr9 | 1.27E+08 | 1.27E+08 | 396 | Promoter (2-3kb)    | ENSG00000224020 | 2500  |
| chr9 | 1.28E+08 | 1.28E+08 | 396 | Promoter (1-2kb)    | ENSG00000236643 | -1432 |
| chr9 | 1.28E+08 | 1.28E+08 | 360 | Promoter (1-2kb)    | ENSG00000239705 | 1777  |
| chr9 | 1.29E+08 | 1.29E+08 | 396 | Promoter (1-2kb)    | ENSG00000232413 | -1369 |
| chr9 | 1.29E+08 | 1.29E+08 | 360 | Promoter (1-2kb)    | ENSG00000232413 | -1374 |
| chr9 | 1.29E+08 | 1.29E+08 | 396 | Promoter (1-2kb)    | ENSG00000232413 | -1146 |
| chr9 | 1.29E+08 | 1.29E+08 | 360 | Promoter (1-2kb)    | ENSG00000232413 | -1174 |
| chr9 | 1.29E+08 | 1.29E+08 | 396 | Promoter (<=1kb)    | ENSG00000232413 | -427  |
| chr9 | 1.29E+08 | 1.29E+08 | 396 | Promoter (1-2kb)    | ENSG00000228392 | 1486  |
| chr9 | 1.29E+08 | 1.29E+08 | 360 | Promoter (1-2kb)    | ENSG00000228392 | 1268  |
| chr9 | 1.29E+08 | 1.29E+08 | 396 | Promoter (<=1kb)    | ENSG00000228392 | 796   |
| chr9 | 1.29E+08 | 1.29E+08 | 360 | Promoter (2-3kb)    | ENSG00000269909 | -2759 |
| chr9 | 1.31E+08 | 1.31E+08 | 396 | Promoter (<=1kb)    | ENSG00000225032 | 0     |
| chr9 | 1.31E+08 | 1.31E+08 | 396 | Promoter (<=1kb)    | ENSG00000225032 | 0     |
| chr9 | 1.31E+08 | 1.31E+08 | 360 | Promoter (<=1kb)    | ENSG00000257524 | 199   |
| chr9 | 1.31E+08 | 1.31E+08 | 360 | Promoter (2-3kb)    | ENSG00000227218 | -2651 |
| chr9 | 1.31E+08 | 1.31E+08 | 396 | Distal Intergenic   | ENSG00000230848 | -3302 |
| chr9 | 1.31E+08 | 1.31E+08 | 360 | Promoter (1-2kb)    | ENSG00000269988 | -1373 |
| chr9 | 1.31E+08 | 1.31E+08 | 396 | Promoter (1-2kb)    | ENSG00000269988 | -1469 |
| chr9 | 1.31E+08 | 1.31E+08 | 360 | Promoter (1-2kb)    | ENSG00000269988 | -1617 |
| chr9 | 1.31E+08 | 1.31E+08 | 396 | Promoter (1-2kb)    | ENSG00000269988 | -1672 |
| chr9 | 1.31E+08 | 1.31E+08 | 396 | Promoter (2-3kb)    | ENSG00000272696 | -2434 |
| chr9 | 1.31E+08 | 1.31E+08 | 396 | Promoter (<=1kb)    | ENSG00000272696 | -82   |
| chr9 | 1.31E+08 | 1.31E+08 | 360 | Promoter (<=1kb)    | ENSG00000272696 | 463   |
| chr9 | 1.31E+08 | 1.31E+08 | 360 | Promoter (<=1kb)    | ENSG00000273186 | 0     |
| chr9 | 1.32E+08 | 1.32E+08 | 396 | Distal Intergenic   | ENSG00000234055 | -3493 |
| chr9 | 1.32E+08 | 1.32E+08 | 396 | Distal Intergenic   | ENSG00000268707 | -4294 |
| chr9 | 1.32E+08 | 1.32E+08 | 396 | Promoter (<=1kb)    | ENSG00000241084 | -42   |
| chr9 | 1.32E+08 | 1.32E+08 | 396 | Distal Intergenic   | ENSG00000179082 | -3220 |
| chr9 | 1.32E+08 | 1.32E+08 | 360 | Distal Intergenic   | ENSG00000179082 | -3235 |
| chr9 | 1.32E+08 | 1.32E+08 | 360 | Promoter (<=1kb)    | ENSG00000204054 | 0     |
| chr9 | 1.34E+08 | 1.34E+08 | 396 | Promoter (2-3kb)    | ENSG00000246851 | 2514  |
| chr9 | 1.34E+08 | 1.34E+08 | 396 | Promoter (<=1kb)    | ENSG00000246851 | 728   |
| chr9 | 1.34E+08 | 1.34E+08 | 360 | Distal Intergenic   | ENSG00000230289 | -3065 |
| chr9 | 1.36E+08 | 1.36E+08 | 360 | Intron (ENST000005) | ENSG00000271875 | -4420 |
| chr9 | 1.37E+08 | 1.37E+08 | 360 | Promoter (2-3kb)    | ENSG00000225756 | 2067  |
| chr9 | 1.37E+08 | 1.37E+08 | 396 | Distal Intergenic   | ENSG00000235106 | -4209 |
| chr9 | 1.37E+08 | 1.37E+08 | 396 | Distal Intergenic   | ENSG00000235106 | -4003 |
| chr9 | 1.37E+08 | 1.37E+08 | 360 | Distal Intergenic   | ENSG00000235106 | -3239 |
| chr9 | 1.37E+08 | 1.37E+08 | 396 | Distal Intergenic   | ENSG00000273473 | -4833 |

|       |          |          |     |                   |                 |       |
|-------|----------|----------|-----|-------------------|-----------------|-------|
| chr9  | 1.37E+08 | 1.37E+08 | 360 | Distal Intergenic | ENSG00000273473 | -4071 |
| chr9  | 1.37E+08 | 1.37E+08 | 360 | Promoter (1-2kb)  | ENSG00000273473 | 1487  |
| chr9  | 1.37E+08 | 1.37E+08 | 360 | Promoter (<=1kb)  | ENSG00000223729 | -612  |
| chr9  | 1.37E+08 | 1.37E+08 | 360 | Promoter (1-2kb)  | ENSG00000223729 | -1112 |
| chr9  | 1.37E+08 | 1.37E+08 | 396 | Promoter (1-2kb)  | ENSG00000223729 | -1177 |
| chr9  | 1.37E+08 | 1.37E+08 | 396 | Promoter (1-2kb)  | ENSG00000223729 | -1784 |
| chr9  | 1.37E+08 | 1.37E+08 | 360 | Promoter (<=1kb)  | ENSG00000223795 | -80   |
| chr9  | 1.37E+08 | 1.37E+08 | 396 | Promoter (1-2kb)  | ENSG00000228877 | -1157 |
| chr9  | 1.37E+08 | 1.37E+08 | 396 | Promoter (2-3kb)  | ENSG00000227150 | -2345 |
| chr9  | 1.37E+08 | 1.37E+08 | 360 | Promoter (<=1kb)  | ENSG00000227150 | 556   |
| chr9  | 1.38E+08 | 1.38E+08 | 360 | Promoter (<=1kb)  | ENSG00000204011 | 0     |
| chr10 | 712599   | 712958   | 360 | Promoter (1-2kb)  | ENSG00000272992 | -1442 |
| chr10 | 785648   | 786043   | 396 | Distal Intergenic | ENSG00000231601 | -3889 |
| chr10 | 788879   | 789238   | 360 | Promoter (<=1kb)  | ENSG00000231601 | -694  |
| chr10 | 789154   | 789513   | 360 | Promoter (<=1kb)  | ENSG00000231601 | -419  |
| chr10 | 3303727  | 3304086  | 360 | Distal Intergenic | ENSG00000227338 | -4109 |
| chr10 | 3303941  | 3304300  | 360 | Distal Intergenic | ENSG00000227338 | -3895 |
| chr10 | 3809979  | 3810374  | 396 | Promoter (<=1kb)  | ENSG00000228353 | 0     |
| chr10 | 3810143  | 3810502  | 360 | Promoter (<=1kb)  | ENSG00000228353 | 36    |
| chr10 | 3810930  | 3811325  | 396 | Promoter (<=1kb)  | ENSG00000228353 | 823   |
| chr10 | 3811160  | 3811555  | 396 | Promoter (1-2kb)  | ENSG00000228353 | 1053  |
| chr10 | 5040333  | 5040728  | 396 | Promoter (2-3kb)  | ENSG00000224251 | 2259  |
| chr10 | 5564389  | 5564784  | 396 | Promoter (<=1kb)  | ENSG00000205488 | 356   |
| chr10 | 5564729  | 5565124  | 396 | Promoter (<=1kb)  | ENSG00000205488 | 16    |
| chr10 | 5571477  | 5571872  | 396 | Distal Intergenic | ENSG00000205488 | -3268 |
| chr10 | 5571766  | 5572161  | 396 | Distal Intergenic | ENSG00000205488 | -3557 |
| chr10 | 5659924  | 5660283  | 360 | Promoter (<=1kb)  | ENSG00000228951 | 0     |
| chr10 | 5660531  | 5660890  | 360 | Promoter (<=1kb)  | ENSG00000228951 | -407  |
| chr10 | 5660656  | 5661051  | 396 | Promoter (<=1kb)  | ENSG00000228951 | -532  |
| chr10 | 5660791  | 5661150  | 360 | Promoter (<=1kb)  | ENSG00000228951 | -667  |
| chr10 | 5664712  | 5665107  | 396 | Distal Intergenic | ENSG00000228951 | -4588 |
| chr10 | 5853622  | 5854017  | 396 | Promoter (1-2kb)  | ENSG00000272764 | -1931 |
| chr10 | 5858067  | 5858462  | 396 | Promoter (2-3kb)  | ENSG00000272764 | 2119  |
| chr10 | 5858331  | 5858726  | 396 | Promoter (2-3kb)  | ENSG00000272764 | 2383  |
| chr10 | 6066033  | 6066428  | 396 | Promoter (1-2kb)  | ENSG00000229664 | -1513 |
| chr10 | 6960207  | 6960566  | 360 | Promoter (1-2kb)  | ENSG00000234248 | 1868  |
| chr10 | 6965980  | 6966339  | 360 | Distal Intergenic | ENSG00000234248 | -3546 |
| chr10 | 8437787  | 8438182  | 396 | Distal Intergenic | ENSG00000226990 | -4641 |
| chr10 | 11650455 | 11650814 | 360 | Promoter (2-3kb)  | ENSG00000271360 | -2490 |
| chr10 | 20381273 | 20381632 | 360 | Promoter (<=1kb)  | ENSG00000238246 | -560  |
| chr10 | 21660943 | 21661338 | 396 | Promoter (<=1kb)  | ENSG00000230109 | 541   |
| chr10 | 21661223 | 21661618 | 396 | Promoter (<=1kb)  | ENSG00000230109 | 261   |
| chr10 | 21663056 | 21663415 | 360 | Promoter (1-2kb)  | ENSG00000230109 | -1177 |
| chr10 | 22545877 | 22546272 | 396 | Promoter (<=1kb)  | ENSG00000261671 | -443  |
| chr10 | 22548542 | 22548901 | 360 | Promoter (1-2kb)  | ENSG00000261671 | 1827  |
| chr10 | 22618401 | 22618796 | 396 | Promoter (2-3kb)  | ENSG00000272516 | -2537 |
| chr10 | 22650842 | 22651201 | 360 | Promoter (<=1kb)  | ENSG00000233451 | 741   |
| chr10 | 25240314 | 25240673 | 360 | Promoter (1-2kb)  | ENSG00000273107 | -1497 |
| chr10 | 27531916 | 27532275 | 360 | Promoter (<=1kb)  | ENSG00000262412 | 0     |
| chr10 | 28290462 | 28290857 | 396 | Promoter (1-2kb)  | ENSG00000233472 | 1745  |
| chr10 | 29081224 | 29081619 | 396 | Promoter (<=1kb)  | ENSG00000232624 | -113  |
| chr10 | 31011549 | 31011908 | 360 | Promoter (<=1kb)  | ENSG00000230720 | -272  |
| chr10 | 33180120 | 33180479 | 360 | Promoter (1-2kb)  | ENSG00000273038 | -1881 |
| chr10 | 33180321 | 33180680 | 360 | Promoter (2-3kb)  | ENSG00000273038 | -2082 |
| chr10 | 33180787 | 33181182 | 396 | Promoter (2-3kb)  | ENSG00000273038 | -2548 |
| chr10 | 33273350 | 33273745 | 396 | Promoter (1-2kb)  | ENSG00000229656 | 1881  |
| chr10 | 33273637 | 33274032 | 396 | Promoter (2-3kb)  | ENSG00000229656 | 2168  |
| chr10 | 34198938 | 34199333 | 396 | Promoter (<=1kb)  | ENSG00000223470 | 772   |

|       |          |          |     |                     |                 |       |
|-------|----------|----------|-----|---------------------|-----------------|-------|
| chr10 | 35495232 | 35495627 | 396 | Distal Intergenic   | ENSG00000269952 | -3717 |
| chr10 | 35497359 | 35497718 | 360 | Promoter (1-2kb)    | ENSG00000269952 | -1626 |
| chr10 | 35626862 | 35627221 | 360 | Promoter (1-2kb)    | ENSG00000271335 | -1533 |
| chr10 | 38147082 | 38147441 | 360 | Promoter (<=1kb)    | ENSG00000236514 | 414   |
| chr10 | 43094639 | 43095034 | 396 | Intron (ENST000004) | ENSG00000272373 | -4524 |
| chr10 | 43137882 | 43138241 | 360 | Distal Intergenic   | ENSG00000272373 | -3866 |
| chr10 | 43137891 | 43138286 | 396 | Distal Intergenic   | ENSG00000272373 | -3875 |
| chr10 | 43138706 | 43139101 | 396 | Distal Intergenic   | ENSG00000272373 | -4690 |
| chr10 | 44130370 | 44130729 | 360 | Intron (ENST000004) | ENSG00000237389 | -3358 |
| chr10 | 44158374 | 44158733 | 360 | Promoter (2-3kb)    | ENSG00000228426 | -2383 |
| chr10 | 44341705 | 44342100 | 396 | Promoter (<=1kb)    | ENSG00000204187 | 951   |
| chr10 | 44792287 | 44792646 | 360 | Distal Intergenic   | ENSG00000229116 | -3130 |
| chr10 | 47654127 | 47654522 | 396 | Promoter (1-2kb)    | ENSG00000259942 | -1562 |
| chr10 | 48247209 | 48247568 | 360 | Promoter (1-2kb)    | ENSG00000270119 | -1766 |
| chr10 | 48251543 | 48251938 | 396 | Promoter (2-3kb)    | ENSG00000270119 | 2209  |
| chr10 | 48251563 | 48251922 | 360 | Promoter (2-3kb)    | ENSG00000270119 | 2229  |
| chr10 | 49362681 | 49363076 | 396 | Promoter (1-2kb)    | ENSG00000232462 | 1101  |
| chr10 | 50622288 | 50622647 | 360 | Distal Intergenic   | ENSG00000235939 | -4676 |
| chr10 | 50622874 | 50623269 | 396 | Distal Intergenic   | ENSG00000235939 | -4054 |
| chr10 | 50623480 | 50623839 | 360 | Distal Intergenic   | ENSG00000235939 | -3484 |
| chr10 | 50624244 | 50624603 | 360 | Promoter (2-3kb)    | ENSG00000235939 | -2720 |
| chr10 | 50624269 | 50624664 | 396 | Promoter (2-3kb)    | ENSG00000235939 | -2659 |
| chr10 | 50624952 | 50625347 | 396 | Promoter (1-2kb)    | ENSG00000235939 | -1976 |
| chr10 | 50625119 | 50625478 | 360 | Promoter (1-2kb)    | ENSG00000235939 | -1845 |
| chr10 | 52231040 | 52231435 | 396 | Promoter (1-2kb)    | ENSG00000225303 | -1139 |
| chr10 | 52383293 | 52383688 | 396 | Promoter (1-2kb)    | ENSG00000226200 | -1023 |
| chr10 | 52720374 | 52720769 | 396 | Distal Intergenic   | ENSG00000261368 | -3261 |
| chr10 | 56248006 | 56248401 | 396 | Promoter (2-3kb)    | ENSG00000234173 | 2016  |
| chr10 | 61042959 | 61043354 | 396 | Promoter (1-2kb)    | ENSG00000236556 | 1052  |
| chr10 | 63445770 | 63446165 | 396 | Promoter (<=1kb)    | ENSG00000272592 | -624  |
| chr10 | 64043890 | 64044285 | 396 | Distal Intergenic   | ENSG00000234756 | -4995 |
| chr10 | 64044090 | 64044485 | 396 | Distal Intergenic   | ENSG00000234756 | -4795 |
| chr10 | 64044636 | 64045031 | 396 | Distal Intergenic   | ENSG00000234756 | -4249 |
| chr10 | 65796306 | 65796665 | 360 | Promoter (<=1kb)    | ENSG00000226426 | 375   |
| chr10 | 68808103 | 68808462 | 360 | Distal Intergenic   | ENSG00000225299 | -3905 |
| chr10 | 69994557 | 69994952 | 396 | Promoter (<=1kb)    | ENSG00000233590 | 238   |
| chr10 | 71031412 | 71031771 | 360 | Distal Intergenic   | ENSG00000231748 | -3508 |
| chr10 | 71333141 | 71333500 | 360 | Promoter (2-3kb)    | ENSG00000236154 | -2063 |
| chr10 | 71334173 | 71334568 | 396 | Promoter (<=1kb)    | ENSG00000236154 | -995  |
| chr10 | 72625864 | 72626259 | 396 | Promoter (<=1kb)    | ENSG00000237998 | 0     |
| chr10 | 72626703 | 72627098 | 396 | Promoter (<=1kb)    | ENSG00000237998 | -575  |
| chr10 | 72686312 | 72686707 | 396 | Promoter (2-3kb)    | ENSG00000271409 | -2975 |
| chr10 | 72694641 | 72695036 | 396 | Distal Intergenic   | ENSG00000259267 | -3774 |
| chr10 | 72694851 | 72695246 | 396 | Distal Intergenic   | ENSG00000259267 | -3564 |
| chr10 | 72697099 | 72697494 | 396 | Promoter (1-2kb)    | ENSG00000259267 | -1316 |
| chr10 | 72700533 | 72700892 | 360 | Promoter (1-2kb)    | ENSG00000259267 | 1643  |
| chr10 | 73810660 | 73811019 | 360 | Promoter (2-3kb)    | ENSG00000272988 | 2776  |
| chr10 | 74882459 | 74882854 | 396 | Promoter (2-3kb)    | ENSG00000272599 | 2309  |
| chr10 | 74883780 | 74884175 | 396 | Promoter (<=1kb)    | ENSG00000272599 | 988   |
| chr10 | 74887776 | 74888135 | 360 | Promoter (2-3kb)    | ENSG00000272599 | -2613 |
| chr10 | 74890121 | 74890480 | 360 | Distal Intergenic   | ENSG00000272599 | -4958 |
| chr10 | 75007929 | 75008324 | 396 | Promoter (<=1kb)    | ENSG00000236756 | 0     |
| chr10 | 75381086 | 75381481 | 396 | Distal Intergenic   | ENSG00000268584 | -4273 |
| chr10 | 75409360 | 75409719 | 360 | Distal Intergenic   | ENSG00000271848 | -4078 |
| chr10 | 75409374 | 75409769 | 396 | Distal Intergenic   | ENSG00000271848 | -4028 |
| chr10 | 75409578 | 75409973 | 396 | Distal Intergenic   | ENSG00000271848 | -3824 |
| chr10 | 75409848 | 75410207 | 360 | Distal Intergenic   | ENSG00000271848 | -3590 |
| chr10 | 75472159 | 75472518 | 360 | Promoter (<=1kb)    | ENSG00000272140 | 749   |

|       |          |          |     |                     |                 |       |
|-------|----------|----------|-----|---------------------|-----------------|-------|
| chr10 | 75472409 | 75472768 | 360 | Promoter (<=1kb)    | ENSG00000272140 | 499   |
| chr10 | 75764624 | 75764983 | 360 | Promoter (<=1kb)    | ENSG00000225761 | 0     |
| chr10 | 75767681 | 75768040 | 360 | Promoter (2-3kb)    | ENSG00000225761 | 2786  |
| chr10 | 75878207 | 75878566 | 360 | Promoter (2-3kb)    | ENSG00000267957 | 2055  |
| chr10 | 75880700 | 75881095 | 396 | Promoter (<=1kb)    | ENSG00000269772 | 0     |
| chr10 | 76289641 | 76290036 | 396 | Promoter (<=1kb)    | ENSG00000232342 | 275   |
| chr10 | 77026968 | 77027327 | 360 | Promoter (2-3kb)    | ENSG00000226051 | -2250 |
| chr10 | 77188436 | 77188831 | 396 | Promoter (2-3kb)    | ENSG00000236842 | 2515  |
| chr10 | 78319255 | 78319614 | 360 | Promoter (1-2kb)    | ENSG00000269256 | 1138  |
| chr10 | 78319356 | 78319751 | 396 | Promoter (1-2kb)    | ENSG00000269256 | 1001  |
| chr10 | 78644451 | 78644846 | 396 | Promoter (2-3kb)    | ENSG00000236467 | -2956 |
| chr10 | 78644727 | 78645122 | 396 | Promoter (2-3kb)    | ENSG00000236467 | -2680 |
| chr10 | 78656923 | 78657318 | 396 | Intron (ENST000004) | ENSG00000236467 | -4258 |
| chr10 | 78684807 | 78685166 | 360 | Intron (ENST000004) | ENSG00000236467 | -4728 |
| chr10 | 78701642 | 78702001 | 360 | Promoter (2-3kb)    | ENSG00000236467 | 2776  |
| chr10 | 79070923 | 79071318 | 396 | Promoter (2-3kb)    | ENSG00000224500 | -2381 |
| chr10 | 79111232 | 79111591 | 360 | Promoter (2-3kb)    | ENSG00000225652 | -2571 |
| chr10 | 79113282 | 79113641 | 360 | Promoter (<=1kb)    | ENSG00000225652 | -521  |
| chr10 | 79114737 | 79115096 | 360 | Promoter (<=1kb)    | ENSG00000225652 | 575   |
| chr10 | 80110587 | 80110982 | 396 | Promoter (1-2kb)    | ENSG00000230229 | -1372 |
| chr10 | 80111962 | 80112321 | 360 | Promoter (<=1kb)    | ENSG00000230229 | -33   |
| chr10 | 80289156 | 80289551 | 396 | Promoter (<=1kb)    | ENSG00000230417 | 648   |
| chr10 | 80289890 | 80290249 | 360 | Promoter (1-2kb)    | ENSG00000230417 | 1382  |
| chr10 | 86960514 | 86960873 | 360 | Promoter (2-3kb)    | ENSG00000237267 | -2800 |
| chr10 | 86960524 | 86960919 | 396 | Promoter (2-3kb)    | ENSG00000237267 | -2810 |
| chr10 | 86960750 | 86961145 | 396 | Distal Intergenic   | ENSG00000237267 | -3036 |
| chr10 | 89369417 | 89369776 | 360 | Promoter (1-2kb)    | ENSG00000225913 | 1675  |
| chr10 | 89416473 | 89416832 | 360 | Promoter (2-3kb)    | ENSG00000196566 | 2928  |
| chr10 | 89640068 | 89640427 | 360 | Promoter (1-2kb)    | ENSG00000224745 | 1619  |
| chr10 | 91046486 | 91046845 | 360 | Promoter (2-3kb)    | ENSG00000232110 | 2923  |
| chr10 | 91215846 | 91216205 | 360 | Promoter (<=1kb)    | ENSG00000234452 | 25    |
| chr10 | 91220682 | 91221041 | 360 | Promoter (1-2kb)    | ENSG00000234452 | -1331 |
| chr10 | 91406341 | 91406736 | 396 | Promoter (1-2kb)    | ENSG00000232936 | 1142  |
| chr10 | 91409538 | 91409933 | 396 | Promoter (<=1kb)    | ENSG00000225836 | 646   |
| chr10 | 91409727 | 91410086 | 360 | Promoter (<=1kb)    | ENSG00000225836 | 493   |
| chr10 | 91410650 | 91411045 | 396 | Promoter (<=1kb)    | ENSG00000225836 | -71   |
| chr10 | 91414639 | 91414998 | 360 | Distal Intergenic   | ENSG00000225836 | -4060 |
| chr10 | 92299618 | 92300013 | 396 | Promoter (<=1kb)    | ENSG00000236373 | 549   |
| chr10 | 92303715 | 92304074 | 360 | Distal Intergenic   | ENSG00000236373 | -3153 |
| chr10 | 92303929 | 92304288 | 360 | Distal Intergenic   | ENSG00000236373 | -3367 |
| chr10 | 92761492 | 92761887 | 396 | Intron (ENST000004) | ENSG00000273124 | -4022 |
| chr10 | 96334517 | 96334912 | 396 | Promoter (2-3kb)    | ENSG00000244332 | -2284 |
| chr10 | 96334728 | 96335123 | 396 | Promoter (2-3kb)    | ENSG00000244332 | -2073 |
| chr10 | 96334860 | 96335219 | 360 | Promoter (1-2kb)    | ENSG00000244332 | -1977 |
| chr10 | 97664186 | 97664581 | 396 | Promoter (2-3kb)    | ENSG00000226688 | 2951  |
| chr10 | 1E+08    | 1E+08    | 396 | Promoter (1-2kb)    | ENSG00000230928 | -1642 |
| chr10 | 1E+08    | 1E+08    | 360 | Promoter (1-2kb)    | ENSG00000230928 | -1382 |
| chr10 | 1E+08    | 1E+08    | 396 | Promoter (1-2kb)    | ENSG00000230928 | -1346 |
| chr10 | 1.02E+08 | 1.02E+08 | 396 | Promoter (<=1kb)    | ENSG00000227695 | 0     |
| chr10 | 1.02E+08 | 1.02E+08 | 360 | Promoter (<=1kb)    | ENSG00000227695 | 354   |
| chr10 | 1.02E+08 | 1.02E+08 | 396 | Promoter (<=1kb)    | ENSG00000227492 | 432   |
| chr10 | 1.02E+08 | 1.02E+08 | 396 | Promoter (<=1kb)    | ENSG00000235823 | -837  |
| chr10 | 1.02E+08 | 1.02E+08 | 396 | Promoter (<=1kb)    | ENSG00000235823 | -532  |
| chr10 | 1.02E+08 | 1.02E+08 | 396 | Promoter (<=1kb)    | ENSG00000235823 | -292  |
| chr10 | 1.02E+08 | 1.02E+08 | 396 | Promoter (<=1kb)    | ENSG00000235823 | -43   |
| chr10 | 1.02E+08 | 1.02E+08 | 360 | Promoter (<=1kb)    | ENSG00000235823 | 0     |
| chr10 | 1.02E+08 | 1.02E+08 | 360 | Promoter (2-3kb)    | ENSG00000273030 | -2804 |
| chr10 | 1.03E+08 | 1.03E+08 | 360 | Promoter (2-3kb)    | ENSG00000272572 | 2441  |



|       |          |          |     |                                     |                 |       |
|-------|----------|----------|-----|-------------------------------------|-----------------|-------|
| chr10 | 1.03E+08 | 1.03E+08 | 360 | Promoter (1-2kb)                    | ENSG00000272572 | -1123 |
| chr10 | 1.03E+08 | 1.03E+08 | 396 | Promoter (1-2kb)                    | ENSG00000236662 | 1641  |
| chr10 | 1.03E+08 | 1.03E+08 | 360 | Promoter (1-2kb)                    | ENSG00000236662 | 1604  |
| chr10 | 1.03E+08 | 1.03E+08 | 360 | Promoter (<=1kb)                    | ENSG00000227128 | 357   |
| chr10 | 1.03E+08 | 1.03E+08 | 396 | Promoter (2-3kb)                    | ENSG00000229649 | -2631 |
| chr10 | 1.03E+08 | 1.03E+08 | 396 | Promoter (2-3kb)                    | ENSG00000229649 | -2864 |
| chr10 | 1.03E+08 | 1.03E+08 | 396 | Promoter (1-2kb)                    | ENSG00000225208 | 1004  |
| chr10 | 1.04E+08 | 1.04E+08 | 396 | Promoter (<=1kb)                    | ENSG00000226009 | 47    |
| chr10 | 1.04E+08 | 1.04E+08 | 360 | Promoter (2-3kb)                    | ENSG00000272933 | -2901 |
| chr10 | 1.12E+08 | 1.12E+08 | 396 | Distal Intergenic                   | ENSG00000273143 | -3524 |
| chr10 | 1.12E+08 | 1.12E+08 | 396 | Distal Intergenic                   | ENSG00000273143 | -3746 |
| chr10 | 1.12E+08 | 1.12E+08 | 396 | Distal Intergenic                   | ENSG00000273143 | -4607 |
| chr10 | 1.13E+08 | 1.13E+08 | 396 | Promoter (<=1kb)                    | ENSG00000203497 | 0     |
| chr10 | 1.14E+08 | 1.14E+08 | 360 | Promoter (1-2kb)                    | ENSG00000232934 | 1219  |
| chr10 | 1.14E+08 | 1.14E+08 | 396 | Intron (ENST000004:ENSG00000232934) | ENSG00000232934 | -4702 |
| chr10 | 1.15E+08 | 1.15E+08 | 396 | Promoter (1-2kb)                    | ENSG00000225292 | 1148  |
| chr10 | 1.15E+08 | 1.15E+08 | 396 | Promoter (2-3kb)                    | ENSG00000225292 | 2025  |
| chr10 | 1.15E+08 | 1.15E+08 | 396 | Promoter (2-3kb)                    | ENSG00000225292 | 2243  |
| chr10 | 1.19E+08 | 1.19E+08 | 396 | Promoter (1-2kb)                    | ENSG00000225936 | 1010  |
| chr10 | 1.19E+08 | 1.19E+08 | 360 | Distal Intergenic                   | ENSG00000258114 | -4640 |
| chr10 | 1.19E+08 | 1.19E+08 | 360 | Promoter (1-2kb)                    | ENSG00000229847 | 1432  |
| chr10 | 1.19E+08 | 1.19E+08 | 360 | Promoter (<=1kb)                    | ENSG00000229847 | 528   |
| chr10 | 1.19E+08 | 1.19E+08 | 396 | Promoter (<=1kb)                    | ENSG00000229847 | 477   |
| chr10 | 1.19E+08 | 1.19E+08 | 360 | Promoter (<=1kb)                    | ENSG00000229847 | 329   |
| chr10 | 1.19E+08 | 1.19E+08 | 360 | Distal Intergenic                   | ENSG00000234952 | -4612 |
| chr10 | 1.2E+08  | 1.2E+08  | 360 | Promoter (1-2kb)                    | ENSG00000263041 | -1536 |
| chr10 | 1.2E+08  | 1.2E+08  | 396 | Promoter (2-3kb)                    | ENSG00000231104 | -2433 |
| chr10 | 1.23E+08 | 1.23E+08 | 396 | Promoter (<=1kb)                    | ENSG00000227165 | -289  |
| chr10 | 1.23E+08 | 1.23E+08 | 396 | Promoter (2-3kb)                    | ENSG00000223432 | -2356 |
| chr10 | 1.23E+08 | 1.23E+08 | 396 | Promoter (2-3kb)                    | ENSG00000223432 | -2980 |
| chr10 | 1.27E+08 | 1.27E+08 | 396 | Promoter (2-3kb)                    | ENSG00000224023 | 2755  |
| chr10 | 1.27E+08 | 1.27E+08 | 396 | Promoter (1-2kb)                    | ENSG00000224023 | -1373 |
| chr10 | 1.28E+08 | 1.28E+08 | 360 | Promoter (2-3kb)                    | ENSG00000235180 | -2336 |
| chr10 | 1.32E+08 | 1.32E+08 | 360 | Promoter (1-2kb)                    | ENSG00000237489 | -1033 |
| chr10 | 1.32E+08 | 1.32E+08 | 396 | Promoter (1-2kb)                    | ENSG00000237489 | -1069 |
| chr11 | 202354   | 202749   | 396 | Promoter (<=1kb)                    | ENSG00000254559 | -874  |
| chr11 | 205933   | 206328   | 396 | Promoter (2-3kb)                    | ENSG00000254559 | 2310  |
| chr11 | 326526   | 326885   | 360 | Promoter (<=1kb)                    | ENSG00000270030 | -232  |
| chr11 | 560406   | 560801   | 396 | Promoter (<=1kb)                    | ENSG00000254815 | 930   |
| chr11 | 560460   | 560819   | 360 | Promoter (<=1kb)                    | ENSG00000254815 | 984   |
| chr11 | 561307   | 561666   | 360 | Promoter (1-2kb)                    | ENSG00000254815 | 1831  |
| chr11 | 565436   | 565831   | 396 | Promoter (2-3kb)                    | ENSG00000247095 | 2538  |
| chr11 | 566735   | 567130   | 396 | Promoter (1-2kb)                    | ENSG00000247095 | 1239  |
| chr11 | 568329   | 568724   | 396 | Promoter (<=1kb)                    | ENSG00000247095 | 0     |
| chr11 | 569886   | 570245   | 360 | Promoter (1-2kb)                    | ENSG00000247095 | -1429 |
| chr11 | 728103   | 728462   | 360 | Promoter (1-2kb)                    | ENSG00000269915 | -1056 |
| chr11 | 728257   | 728652   | 396 | Promoter (1-2kb)                    | ENSG00000269915 | -1210 |
| chr11 | 728420   | 728779   | 360 | Promoter (1-2kb)                    | ENSG00000269915 | -1373 |
| chr11 | 729660   | 730019   | 360 | Promoter (2-3kb)                    | ENSG00000269915 | -2613 |
| chr11 | 730580   | 730939   | 360 | Distal Intergenic                   | ENSG00000269915 | -3533 |
| chr11 | 777467   | 777862   | 396 | Distal Intergenic                   | ENSG00000255142 | -3783 |
| chr11 | 778375   | 778770   | 396 | Promoter (2-3kb)                    | ENSG00000255142 | -2875 |
| chr11 | 778645   | 779004   | 360 | Promoter (2-3kb)                    | ENSG00000255142 | -2641 |
| chr11 | 826188   | 826583   | 396 | Promoter (1-2kb)                    | ENSG00000255108 | -1543 |
| chr11 | 826858   | 827217   | 360 | Promoter (2-3kb)                    | ENSG00000255108 | -2213 |
| chr11 | 827384   | 827743   | 360 | Promoter (2-3kb)                    | ENSG00000255108 | -2739 |
| chr11 | 830466   | 830861   | 396 | Promoter (2-3kb)                    | ENSG00000255108 | 2022  |
| chr11 | 830761   | 831156   | 396 | Promoter (1-2kb)                    | ENSG00000255108 | 1727  |

|       |          |          |     |                                     |                 |       |
|-------|----------|----------|-----|-------------------------------------|-----------------|-------|
| chr11 | 830807   | 831166   | 360 | Promoter (1-2kb)                    | ENSG00000255108 | 1717  |
| chr11 | 831071   | 831430   | 360 | Promoter (1-2kb)                    | ENSG00000255108 | 1453  |
| chr11 | 861385   | 861780   | 396 | Promoter (1-2kb)                    | ENSG00000250397 | -1590 |
| chr11 | 1270360  | 1270719  | 360 | Promoter (<=1kb)                    | ENSG00000255177 | 187   |
| chr11 | 1595500  | 1595895  | 396 | Promoter (<=1kb)                    | ENSG00000233930 | 621   |
| chr11 | 1682587  | 1682982  | 396 | Promoter (1-2kb)                    | ENSG00000231487 | 1591  |
| chr11 | 1682630  | 1682989  | 360 | Promoter (1-2kb)                    | ENSG00000231487 | 1584  |
| chr11 | 1689322  | 1689681  | 360 | Promoter (2-3kb)                    | ENSG00000205866 | 2495  |
| chr11 | 1689335  | 1689730  | 396 | Promoter (2-3kb)                    | ENSG00000205866 | 2508  |
| chr11 | 1689817  | 1690212  | 396 | Promoter (2-3kb)                    | ENSG00000205866 | 2990  |
| chr11 | 2148152  | 2148511  | 360 | Promoter (2-3kb)                    | ENSG00000240801 | 2683  |
| chr11 | 2156455  | 2156850  | 396 | Distal Intergenic                   | ENSG00000099869 | -4881 |
| chr11 | 2399909  | 2400304  | 396 | Promoter (<=1kb)                    | ENSG00000238184 | -687  |
| chr11 | 2400138  | 2400497  | 360 | Promoter (<=1kb)                    | ENSG00000238184 | -916  |
| chr11 | 2400565  | 2400960  | 396 | Promoter (1-2kb)                    | ENSG00000238184 | -1343 |
| chr11 | 2400795  | 2401190  | 396 | Promoter (1-2kb)                    | ENSG00000238184 | -1573 |
| chr11 | 2401171  | 2401530  | 360 | Promoter (1-2kb)                    | ENSG00000238184 | -1949 |
| chr11 | 2420535  | 2420930  | 396 | Distal Intergenic                   | ENSG00000230483 | -4815 |
| chr11 | 2420683  | 2421042  | 360 | Distal Intergenic                   | ENSG00000230483 | -4703 |
| chr11 | 2721048  | 2721407  | 360 | Promoter (<=1kb)                    | ENSG00000269821 | 0     |
| chr11 | 2892900  | 2893259  | 360 | Promoter (1-2kb)                    | ENSG00000237941 | 1637  |
| chr11 | 3879683  | 3880042  | 360 | Promoter (2-3kb)                    | ENSG00000228661 | -2944 |
| chr11 | 3880147  | 3880542  | 396 | Distal Intergenic                   | ENSG00000228661 | -3408 |
| chr11 | 6379158  | 6379553  | 396 | Distal Intergenic                   | ENSG00000254443 | -4476 |
| chr11 | 6379192  | 6379551  | 360 | Distal Intergenic                   | ENSG00000254443 | -4478 |
| chr11 | 6638268  | 6638663  | 396 | Promoter (1-2kb)                    | ENSG00000255680 | -1358 |
| chr11 | 6638509  | 6638904  | 396 | Promoter (1-2kb)                    | ENSG00000255680 | -1117 |
| chr11 | 7593406  | 7593801  | 396 | Promoter (<=1kb)                    | ENSG00000254864 | -129  |
| chr11 | 8697834  | 8698193  | 360 | Promoter (2-3kb)                    | ENSG00000254900 | -2443 |
| chr11 | 8699905  | 8700300  | 396 | Promoter (<=1kb)                    | ENSG00000254900 | -336  |
| chr11 | 9078129  | 9078488  | 360 | Promoter (<=1kb)                    | ENSG00000253973 | -310  |
| chr11 | 9264567  | 9264926  | 360 | Promoter (2-3kb)                    | ENSG00000255097 | 2130  |
| chr11 | 9459367  | 9459726  | 360 | Distal Intergenic                   | ENSG00000254397 | -4334 |
| chr11 | 9777336  | 9777731  | 396 | Promoter (1-2kb)                    | ENSG00000245522 | 1980  |
| chr11 | 9862117  | 9862512  | 396 | Promoter (1-2kb)                    | ENSG00000255476 | 1427  |
| chr11 | 10326064 | 10326459 | 396 | Promoter (<=1kb)                    | ENSG00000254554 | -813  |
| chr11 | 10326348 | 10326743 | 396 | Promoter (1-2kb)                    | ENSG00000254554 | -1097 |
| chr11 | 10326453 | 10326812 | 360 | Promoter (1-2kb)                    | ENSG00000254554 | -1202 |
| chr11 | 10326568 | 10326963 | 396 | Promoter (1-2kb)                    | ENSG00000254554 | -1317 |
| chr11 | 10326677 | 10327036 | 360 | Promoter (1-2kb)                    | ENSG00000254554 | -1426 |
| chr11 | 10610196 | 10610555 | 360 | Intron (ENST000005:ENSG00000177112) | ENSG00000177112 | -4189 |
| chr11 | 10800445 | 10800840 | 396 | Distal Intergenic                   | ENSG00000255125 | -4020 |
| chr11 | 10802696 | 10803055 | 360 | Promoter (1-2kb)                    | ENSG00000255125 | -1805 |
| chr11 | 10874890 | 10875249 | 360 | Distal Intergenic                   | ENSG00000247271 | -4557 |
| chr11 | 10876934 | 10877293 | 360 | Promoter (2-3kb)                    | ENSG00000247271 | -2513 |
| chr11 | 12052132 | 12052491 | 360 | Promoter (<=1kb)                    | ENSG00000254486 | 0     |
| chr11 | 12845813 | 12846172 | 360 | Promoter (<=1kb)                    | ENSG00000254688 | -599  |
| chr11 | 12845910 | 12846305 | 396 | Promoter (<=1kb)                    | ENSG00000254688 | -696  |
| chr11 | 12942261 | 12942620 | 360 | Promoter (1-2kb)                    | ENSG00000203258 | 1852  |
| chr11 | 13007751 | 13008146 | 396 | Promoter (1-2kb)                    | ENSG00000251381 | -1912 |
| chr11 | 13007959 | 13008354 | 396 | Promoter (2-3kb)                    | ENSG00000251381 | -2120 |
| chr11 | 13012147 | 13012542 | 396 | Promoter (1-2kb)                    | ENSG00000251381 | -1052 |
| chr11 | 13012386 | 13012781 | 396 | Promoter (1-2kb)                    | ENSG00000251381 | -1291 |
| chr11 | 13979674 | 13980069 | 396 | Distal Intergenic                   | ENSG00000152268 | -3845 |
| chr11 | 15661139 | 15661534 | 396 | Distal Intergenic                   | ENSG00000254695 | -3897 |
| chr11 | 18533965 | 18534324 | 360 | Distal Intergenic                   | ENSG00000256588 | -3598 |
| chr11 | 20002184 | 20002543 | 360 | Promoter (<=1kb)                    | ENSG00000254542 | 340   |
| chr11 | 20003271 | 20003630 | 360 | Promoter (<=1kb)                    | ENSG00000254542 | -388  |

|       |          |          |     |                   |                 |       |
|-------|----------|----------|-----|-------------------|-----------------|-------|
| chr11 | 20003475 | 20003834 | 360 | Promoter (<=1kb)  | ENSG00000254542 | -592  |
| chr11 | 28043929 | 28044324 | 396 | Promoter (2-3kb)  | ENSG00000255094 | -2807 |
| chr11 | 28697895 | 28698290 | 396 | Promoter (2-3kb)  | ENSG00000248990 | -2440 |
| chr11 | 31810481 | 31810876 | 396 | Promoter (1-2kb)  | ENSG00000272286 | -1962 |
| chr11 | 31811027 | 31811422 | 396 | Promoter (2-3kb)  | ENSG00000272286 | -2508 |
| chr11 | 31813039 | 31813434 | 396 | Distal Intergenic | ENSG00000272286 | -4520 |
| chr11 | 32071449 | 32071844 | 396 | Promoter (2-3kb)  | ENSG00000254836 | 2962  |
| chr11 | 32071653 | 32072048 | 396 | Promoter (2-3kb)  | ENSG00000254836 | 2758  |
| chr11 | 34587214 | 34587573 | 360 | Distal Intergenic | ENSG00000255427 | -4850 |
| chr11 | 35305281 | 35305640 | 360 | Promoter (1-2kb)  | ENSG00000255004 | 1921  |
| chr11 | 43897217 | 43897612 | 396 | Promoter (2-3kb)  | ENSG00000246250 | 2011  |
| chr11 | 43969481 | 43969840 | 360 | Promoter (<=1kb)  | ENSG00000244953 | -725  |
| chr11 | 43969700 | 43970059 | 360 | Promoter (<=1kb)  | ENSG00000244953 | -944  |
| chr11 | 44760177 | 44760536 | 360 | Promoter (1-2kb)  | ENSG00000255032 | -1935 |
| chr11 | 45255954 | 45256349 | 396 | Promoter (<=1kb)  | ENSG00000254664 | 494   |
| chr11 | 45374460 | 45374819 | 360 | Promoter (2-3kb)  | ENSG00000254427 | -2103 |
| chr11 | 45755165 | 45755524 | 360 | Promoter (1-2kb)  | ENSG00000255426 | 1793  |
| chr11 | 45757537 | 45757896 | 360 | Promoter (<=1kb)  | ENSG00000255426 | -220  |
| chr11 | 45771898 | 45772257 | 360 | Promoter (<=1kb)  | ENSG00000255226 | 867   |
| chr11 | 46133207 | 46133602 | 396 | Distal Intergenic | ENSG00000254653 | -4527 |
| chr11 | 46241127 | 46241522 | 396 | Distal Intergenic | ENSG00000255269 | -3718 |
| chr11 | 46299101 | 46299460 | 360 | Distal Intergenic | ENSG00000255007 | -3003 |
| chr11 | 47149486 | 47149845 | 360 | Promoter (2-3kb)  | ENSG00000255520 | 2507  |
| chr11 | 47189416 | 47189811 | 396 | Promoter (1-2kb)  | ENSG00000270060 | 1303  |
| chr11 | 47193901 | 47194260 | 360 | Promoter (2-3kb)  | ENSG00000270060 | -2787 |
| chr11 | 47193906 | 47194301 | 396 | Promoter (2-3kb)  | ENSG00000270060 | -2792 |
| chr11 | 47247766 | 47248125 | 360 | Distal Intergenic | ENSG00000256897 | -4464 |
| chr11 | 47430966 | 47431325 | 360 | Promoter (<=1kb)  | ENSG00000255197 | -225  |
| chr11 | 48035570 | 48035965 | 396 | Promoter (1-2kb)  | ENSG00000254879 | 1442  |
| chr11 | 57826324 | 57826719 | 396 | Promoter (<=1kb)  | ENSG00000255146 | 891   |
| chr11 | 57826422 | 57826781 | 360 | Promoter (<=1kb)  | ENSG00000255146 | 829   |
| chr11 | 57829853 | 57830248 | 396 | Promoter (2-3kb)  | ENSG00000255146 | -2243 |
| chr11 | 60696333 | 60696728 | 396 | Distal Intergenic | ENSG00000256196 | -3464 |
| chr11 | 61260339 | 61260734 | 396 | Distal Intergenic | ENSG00000255931 | -3178 |
| chr11 | 61310882 | 61311241 | 360 | Promoter (1-2kb)  | ENSG00000256443 | -1151 |
| chr11 | 62025390 | 62025785 | 396 | Promoter (2-3kb)  | ENSG00000254404 | 2236  |
| chr11 | 62025467 | 62025826 | 360 | Promoter (2-3kb)  | ENSG00000254404 | 2195  |
| chr11 | 62025590 | 62025985 | 396 | Promoter (2-3kb)  | ENSG00000254404 | 2036  |
| chr11 | 62108101 | 62108460 | 360 | Promoter (2-3kb)  | ENSG00000255118 | -2539 |
| chr11 | 62108304 | 62108663 | 360 | Promoter (2-3kb)  | ENSG00000255118 | -2742 |
| chr11 | 62109252 | 62109611 | 360 | Distal Intergenic | ENSG00000255118 | -3690 |
| chr11 | 62196716 | 62197075 | 360 | Promoter (2-3kb)  | ENSG00000255446 | -2520 |
| chr11 | 62311079 | 62311474 | 396 | Promoter (1-2kb)  | ENSG00000257058 | -1997 |
| chr11 | 62538272 | 62538631 | 360 | Promoter (<=1kb)  | ENSG00000267811 | 447   |
| chr11 | 62543939 | 62544298 | 360 | Distal Intergenic | ENSG00000267811 | -4861 |
| chr11 | 62551430 | 62551789 | 360 | Promoter (2-3kb)  | ENSG00000269176 | 2468  |
| chr11 | 62572789 | 62573148 | 360 | Promoter (2-3kb)  | ENSG00000269463 | 2387  |
| chr11 | 62572988 | 62573347 | 360 | Promoter (2-3kb)  | ENSG00000269463 | 2188  |
| chr11 | 62573267 | 62573662 | 396 | Promoter (1-2kb)  | ENSG00000269463 | 1873  |
| chr11 | 62573473 | 62573832 | 360 | Promoter (1-2kb)  | ENSG00000269463 | 1703  |
| chr11 | 62574050 | 62574445 | 396 | Promoter (1-2kb)  | ENSG00000269463 | 1090  |
| chr11 | 62576181 | 62576540 | 360 | Promoter (<=1kb)  | ENSG00000269463 | -646  |
| chr11 | 62599043 | 62599438 | 396 | Promoter (<=1kb)  | ENSG00000256690 | -268  |
| chr11 | 62599072 | 62599431 | 360 | Promoter (<=1kb)  | ENSG00000256690 | -275  |
| chr11 | 62599279 | 62599638 | 360 | Promoter (<=1kb)  | ENSG00000256690 | -68   |
| chr11 | 62601166 | 62601561 | 396 | Promoter (<=1kb)  | ENSG00000256690 | 759   |
| chr11 | 62601182 | 62601541 | 360 | Promoter (<=1kb)  | ENSG00000256690 | 775   |
| chr11 | 62621940 | 62622335 | 396 | Promoter (<=1kb)  | ENSG00000255717 | 0     |

|       |          |          |     |                                     |                 |       |
|-------|----------|----------|-----|-------------------------------------|-----------------|-------|
| chr11 | 62622117 | 62622476 | 360 | Promoter (<=1kb)                    | ENSG00000255717 | 0     |
| chr11 | 62672124 | 62672519 | 396 | Distal Intergenic                   | ENSG00000257002 | -4499 |
| chr11 | 62678245 | 62678640 | 396 | Promoter (1-2kb)                    | ENSG00000257002 | 1227  |
| chr11 | 62678541 | 62678936 | 396 | Promoter (1-2kb)                    | ENSG00000257002 | 1523  |
| chr11 | 62678779 | 62679174 | 396 | Promoter (1-2kb)                    | ENSG00000257002 | 1761  |
| chr11 | 62679014 | 62679409 | 396 | Promoter (1-2kb)                    | ENSG00000257002 | 1996  |
| chr11 | 63402438 | 63402797 | 360 | Promoter (2-3kb)                    | ENSG00000256789 | -2352 |
| chr11 | 63536108 | 63536503 | 396 | Promoter (<=1kb)                    | ENSG00000188070 | 0     |
| chr11 | 63536770 | 63537165 | 396 | Promoter (<=1kb)                    | ENSG00000255651 | -657  |
| chr11 | 63822537 | 63822932 | 396 | Intron (ENST000005:ENSG00000256824) | ENSG00000256824 | -4964 |
| chr11 | 63843883 | 63844278 | 396 | Intron (ENST000005:ENSG00000256481) | ENSG00000256481 | -4884 |
| chr11 | 63883456 | 63883851 | 396 | Promoter (2-3kb)                    | ENSG00000256341 | 2831  |
| chr11 | 63888739 | 63889098 | 360 | Promoter (2-3kb)                    | ENSG00000256341 | -2057 |
| chr11 | 64006758 | 64007153 | 396 | Distal Intergenic                   | ENSG00000256116 | -4934 |
| chr11 | 64011885 | 64012280 | 396 | Promoter (1-2kb)                    | ENSG00000256940 | -1156 |
| chr11 | 64098290 | 64098685 | 396 | Promoter (1-2kb)                    | ENSG00000236935 | -1314 |
| chr11 | 64098497 | 64098892 | 396 | Promoter (1-2kb)                    | ENSG00000236935 | -1521 |
| chr11 | 64166002 | 64166397 | 396 | Promoter (2-3kb)                    | ENSG00000231680 | -2699 |
| chr11 | 64166049 | 64166408 | 360 | Promoter (2-3kb)                    | ENSG00000231680 | -2746 |
| chr11 | 64167826 | 64168185 | 360 | Distal Intergenic                   | ENSG00000231680 | -4523 |
| chr11 | 64184251 | 64184646 | 396 | Distal Intergenic                   | ENSG00000231492 | -3217 |
| chr11 | 64185396 | 64185791 | 396 | Promoter (2-3kb)                    | ENSG00000231492 | -2072 |
| chr11 | 64185933 | 64186292 | 360 | Promoter (1-2kb)                    | ENSG00000231492 | -1571 |
| chr11 | 64185988 | 64186383 | 396 | Promoter (1-2kb)                    | ENSG00000231492 | -1480 |
| chr11 | 64190538 | 64190897 | 360 | Promoter (2-3kb)                    | ENSG00000231492 | 2531  |
| chr11 | 64269669 | 64270064 | 396 | Promoter (1-2kb)                    | ENSG00000232500 | 1344  |
| chr11 | 64270332 | 64270691 | 360 | Promoter (2-3kb)                    | ENSG00000232500 | 2007  |
| chr11 | 64270622 | 64271017 | 396 | Promoter (2-3kb)                    | ENSG00000232500 | 2297  |
| chr11 | 64555328 | 64555723 | 396 | Promoter (2-3kb)                    | ENSG00000269290 | -2236 |
| chr11 | 64555574 | 64555969 | 396 | Promoter (2-3kb)                    | ENSG00000269290 | -2482 |
| chr11 | 64876815 | 64877174 | 360 | Promoter (1-2kb)                    | ENSG00000254501 | 1993  |
| chr11 | 64877057 | 64877416 | 360 | Promoter (1-2kb)                    | ENSG00000254501 | 1751  |
| chr11 | 64877133 | 64877528 | 396 | Promoter (1-2kb)                    | ENSG00000254501 | 1639  |
| chr11 | 64878334 | 64878693 | 360 | Promoter (<=1kb)                    | ENSG00000254501 | 474   |
| chr11 | 64879059 | 64879454 | 396 | Promoter (<=1kb)                    | ENSG00000254501 | 0     |
| chr11 | 65129622 | 65129981 | 360 | Distal Intergenic                   | ENSG00000255478 | -4928 |
| chr11 | 65133492 | 65133851 | 360 | Promoter (1-2kb)                    | ENSG00000255478 | -1058 |
| chr11 | 65134278 | 65134673 | 396 | Promoter (<=1kb)                    | ENSG00000255478 | -236  |
| chr11 | 65134318 | 65134677 | 360 | Promoter (<=1kb)                    | ENSG00000255478 | -232  |
| chr11 | 65135581 | 65135976 | 396 | Promoter (<=1kb)                    | ENSG00000255478 | 672   |
| chr11 | 65260801 | 65261196 | 396 | Distal Intergenic                   | ENSG00000251562 | -4037 |
| chr11 | 65261536 | 65261931 | 396 | Distal Intergenic                   | ENSG00000251562 | -3302 |
| chr11 | 65261816 | 65262211 | 396 | Distal Intergenic                   | ENSG00000251562 | -3022 |
| chr11 | 65507847 | 65508242 | 396 | Distal Intergenic                   | ENSG00000255557 | -4958 |
| chr11 | 65514315 | 65514710 | 396 | Promoter (1-2kb)                    | ENSG00000255557 | 1115  |
| chr11 | 65556386 | 65556781 | 396 | Promoter (<=1kb)                    | ENSG00000255120 | 565   |
| chr11 | 65556931 | 65557290 | 360 | Promoter (<=1kb)                    | ENSG00000255120 | 56    |
| chr11 | 65557154 | 65557549 | 396 | Promoter (<=1kb)                    | ENSG00000255120 | 0     |
| chr11 | 65558566 | 65558925 | 360 | Promoter (<=1kb)                    | ENSG00000255120 | -227  |
| chr11 | 65560804 | 65561163 | 360 | Promoter (2-3kb)                    | ENSG00000255120 | -2465 |
| chr11 | 65567631 | 65568026 | 396 | Promoter (2-3kb)                    | ENSG00000255404 | -2941 |
| chr11 | 65569601 | 65569960 | 360 | Distal Intergenic                   | ENSG00000255404 | -4911 |
| chr11 | 66015569 | 66015964 | 396 | Promoter (1-2kb)                    | ENSG00000255320 | -1859 |
| chr11 | 66018381 | 66018776 | 396 | Distal Intergenic                   | ENSG00000255320 | -4671 |
| chr11 | 66031288 | 66031647 | 360 | Promoter (1-2kb)                    | ENSG00000254855 | 1490  |
| chr11 | 66045295 | 66045654 | 360 | Promoter (<=1kb)                    | ENSG00000254452 | -332  |
| chr11 | 66250196 | 66250555 | 360 | Promoter (2-3kb)                    | ENSG00000255517 | -2492 |
| chr11 | 66309913 | 66310308 | 396 | Distal Intergenic                   | ENSG00000269990 | -4506 |

|       |          |          |     |                                     |                 |       |
|-------|----------|----------|-----|-------------------------------------|-----------------|-------|
| chr11 | 66328336 | 66328695 | 360 | Promoter (<=1kb)                    | ENSG00000250105 | -481  |
| chr11 | 66328395 | 66328790 | 396 | Promoter (<=1kb)                    | ENSG00000250105 | -540  |
| chr11 | 66328750 | 66329145 | 396 | Promoter (<=1kb)                    | ENSG00000250105 | -895  |
| chr11 | 66429726 | 66430085 | 360 | Distal Intergenic                   | ENSG00000258297 | -3422 |
| chr11 | 66429957 | 66430316 | 360 | Distal Intergenic                   | ENSG00000258297 | -3191 |
| chr11 | 67139672 | 67140031 | 360 | Promoter (1-2kb)                    | ENSG00000256514 | 1024  |
| chr11 | 67650555 | 67650950 | 396 | Promoter (2-3kb)                    | ENSG00000251637 | -2998 |
| chr11 | 68380503 | 68380898 | 396 | Promoter (2-3kb)                    | ENSG00000260808 | 2800  |
| chr11 | 68383996 | 68384355 | 360 | Promoter (<=1kb)                    | ENSG00000260808 | 0     |
| chr11 | 68632815 | 68633174 | 360 | Distal Intergenic                   | ENSG00000250508 | -4958 |
| chr11 | 68714069 | 68714428 | 360 | Distal Intergenic                   | ENSG00000255741 | -3749 |
| chr11 | 68870336 | 68870695 | 360 | Promoter (<=1kb)                    | ENSG00000260895 | -266  |
| chr11 | 68938692 | 68939051 | 360 | Promoter (<=1kb)                    | ENSG00000261070 | 0     |
| chr11 | 69238448 | 69238807 | 360 | Promoter (1-2kb)                    | ENSG00000255980 | -1651 |
| chr11 | 69278565 | 69278960 | 396 | Distal Intergenic                   | ENSG00000261347 | -3406 |
| chr11 | 69298445 | 69298840 | 396 | Distal Intergenic                   | ENSG00000255774 | -3737 |
| chr11 | 69834188 | 69834547 | 360 | Promoter (2-3kb)                    | ENSG00000255191 | 2206  |
| chr11 | 69918676 | 69919071 | 396 | Promoter (2-3kb)                    | ENSG00000254417 | 2383  |
| chr11 | 69970340 | 69970735 | 396 | Distal Intergenic                   | ENSG00000255143 | -4668 |
| chr11 | 69970357 | 69970716 | 360 | Distal Intergenic                   | ENSG00000255143 | -4687 |
| chr11 | 70203169 | 70203528 | 360 | Promoter (1-2kb)                    | ENSG00000254495 | 1255  |
| chr11 | 70203180 | 70203575 | 396 | Promoter (1-2kb)                    | ENSG00000254495 | 1208  |
| chr11 | 70203401 | 70203796 | 396 | Promoter (<=1kb)                    | ENSG00000254495 | 987   |
| chr11 | 70213412 | 70213771 | 360 | Distal Intergenic                   | ENSG00000254604 | -3938 |
| chr11 | 70706002 | 70706361 | 360 | Promoter (2-3kb)                    | ENSG00000171671 | -2534 |
| chr11 | 71421243 | 71421638 | 396 | Distal Intergenic                   | ENSG00000254972 | -4793 |
| chr11 | 72117670 | 72118029 | 360 | Distal Intergenic                   | ENSG00000256403 | -3731 |
| chr11 | 72397916 | 72398275 | 360 | Promoter (1-2kb)                    | ENSG00000256007 | 1796  |
| chr11 | 72398050 | 72398445 | 396 | Promoter (1-2kb)                    | ENSG00000256007 | 1930  |
| chr11 | 72411723 | 72412082 | 360 | Promoter (<=1kb)                    | ENSG00000245148 | 204   |
| chr11 | 72414248 | 72414607 | 360 | Promoter (2-3kb)                    | ENSG00000245148 | 2729  |
| chr11 | 72414276 | 72414671 | 396 | Promoter (2-3kb)                    | ENSG00000245148 | 2757  |
| chr11 | 73020149 | 73020544 | 396 | Promoter (<=1kb)                    | ENSG00000257038 | 0     |
| chr11 | 73022163 | 73022558 | 396 | Promoter (1-2kb)                    | ENSG00000257038 | -1757 |
| chr11 | 73679130 | 73679525 | 396 | Promoter (1-2kb)                    | ENSG00000255847 | 1807  |
| chr11 | 74018436 | 74018795 | 360 | Distal Intergenic                   | ENSG00000246211 | -3612 |
| chr11 | 74162411 | 74162806 | 396 | Intron (ENST000005:ENSG00000254928) | ENSG00000254928 | -3587 |
| chr11 | 74849790 | 74850149 | 360 | Promoter (1-2kb)                    | ENSG00000255395 | 1044  |
| chr11 | 74853332 | 74853727 | 396 | Promoter (2-3kb)                    | ENSG00000255395 | -2139 |
| chr11 | 74853610 | 74854005 | 396 | Promoter (2-3kb)                    | ENSG00000255395 | -2417 |
| chr11 | 74949063 | 74949422 | 360 | Promoter (2-3kb)                    | ENSG00000255136 | 2670  |
| chr11 | 74949153 | 74949548 | 396 | Promoter (2-3kb)                    | ENSG00000255136 | 2544  |
| chr11 | 75305159 | 75305518 | 360 | Promoter (2-3kb)                    | ENSG00000255434 | 2797  |
| chr11 | 75311012 | 75311371 | 360 | Promoter (2-3kb)                    | ENSG00000255434 | -2697 |
| chr11 | 75349575 | 75349934 | 360 | Promoter (<=1kb)                    | ENSG00000254630 | 0     |
| chr11 | 75349738 | 75350133 | 396 | Promoter (<=1kb)                    | ENSG00000254630 | -106  |
| chr11 | 75350627 | 75350986 | 360 | Promoter (<=1kb)                    | ENSG00000254630 | -995  |
| chr11 | 75351099 | 75351494 | 396 | Promoter (1-2kb)                    | ENSG00000254630 | -1467 |
| chr11 | 75351199 | 75351558 | 360 | Promoter (1-2kb)                    | ENSG00000254630 | -1567 |
| chr11 | 75351372 | 75351767 | 396 | Promoter (1-2kb)                    | ENSG00000254630 | -1740 |
| chr11 | 75352210 | 75352605 | 396 | Promoter (2-3kb)                    | ENSG00000254630 | -2578 |
| chr11 | 75352259 | 75352618 | 360 | Promoter (2-3kb)                    | ENSG00000254630 | -2627 |
| chr11 | 75352728 | 75353087 | 360 | Distal Intergenic                   | ENSG00000254630 | -3096 |
| chr11 | 75517203 | 75517562 | 360 | Promoter (2-3kb)                    | ENSG00000254814 | -2743 |
| chr11 | 75517912 | 75518307 | 396 | Intron (ENST000005:ENSG00000254814) | ENSG00000254814 | -3452 |
| chr11 | 75519461 | 75519856 | 396 | Promoter (2-3kb)                    | ENSG00000255507 | 2757  |
| chr11 | 75519499 | 75519858 | 360 | Promoter (2-3kb)                    | ENSG00000255507 | 2755  |
| chr11 | 75524977 | 75525372 | 396 | Promoter (<=1kb)                    | ENSG00000255507 | 228   |

|       |          |          |     |                   |                 |       |
|-------|----------|----------|-----|-------------------|-----------------|-------|
| chr11 | 75526475 | 75526834 | 360 | Promoter (<=1kb)  | ENSG00000255507 | -24   |
| chr11 | 75901668 | 75902063 | 396 | Promoter (<=1kb)  | ENSG00000254933 | 0     |
| chr11 | 76380955 | 76381350 | 396 | Distal Intergenic | ENSG00000254975 | -4773 |
| chr11 | 76381171 | 76381566 | 396 | Distal Intergenic | ENSG00000254975 | -4557 |
| chr11 | 76381360 | 76381719 | 360 | Distal Intergenic | ENSG00000254975 | -4404 |
| chr11 | 76432588 | 76432947 | 360 | Promoter (1-2kb)  | ENSG00000254761 | -1936 |
| chr11 | 76491329 | 76491688 | 360 | Promoter (2-3kb)  | ENSG00000255100 | 2415  |
| chr11 | 76508460 | 76508855 | 396 | Promoter (2-3kb)  | ENSG00000261578 | -2553 |
| chr11 | 78035209 | 78035568 | 360 | Promoter (<=1kb)  | ENSG00000254420 | -236  |
| chr11 | 78037281 | 78037676 | 396 | Promoter (1-2kb)  | ENSG00000254420 | 1477  |
| chr11 | 78101061 | 78101456 | 396 | Promoter (1-2kb)  | ENSG00000254649 | 1954  |
| chr11 | 78138562 | 78138921 | 360 | Promoter (1-2kb)  | ENSG00000251323 | 1961  |
| chr11 | 78139084 | 78139443 | 360 | Promoter (1-2kb)  | ENSG00000251323 | 1439  |
| chr11 | 78139105 | 78139500 | 396 | Promoter (1-2kb)  | ENSG00000251323 | 1382  |
| chr11 | 78139335 | 78139694 | 360 | Promoter (1-2kb)  | ENSG00000251323 | 1188  |
| chr11 | 78139369 | 78139764 | 396 | Promoter (1-2kb)  | ENSG00000251323 | 1118  |
| chr11 | 78141133 | 78141492 | 360 | Promoter (<=1kb)  | ENSG00000251323 | -251  |
| chr11 | 78143591 | 78143950 | 360 | Promoter (2-3kb)  | ENSG00000251323 | -2709 |
| chr11 | 82805133 | 82805492 | 360 | Promoter (2-3kb)  | ENSG00000255503 | 2746  |
| chr11 | 82810303 | 82810698 | 396 | Promoter (2-3kb)  | ENSG00000255503 | -2065 |
| chr11 | 82811140 | 82811499 | 360 | Promoter (2-3kb)  | ENSG00000255503 | -2902 |
| chr11 | 82901446 | 82901841 | 396 | Promoter (<=1kb)  | ENSG00000247137 | 298   |
| chr11 | 82906205 | 82906600 | 396 | Promoter (1-2kb)  | ENSG00000247137 | -1369 |
| chr11 | 86141333 | 86141692 | 360 | Promoter (<=1kb)  | ENSG00000254733 | -940  |
| chr11 | 94881789 | 94882148 | 360 | Promoter (1-2kb)  | ENSG00000245552 | -1555 |
| chr11 | 96237855 | 96238250 | 396 | Promoter (1-2kb)  | ENSG00000255679 | 1740  |
| chr11 | 96239139 | 96239498 | 360 | Promoter (<=1kb)  | ENSG00000255679 | 492   |
| chr11 | 96241549 | 96241908 | 360 | Promoter (<=1kb)  | ENSG00000256684 | 0     |
| chr11 | 96243298 | 96243693 | 396 | Promoter (1-2kb)  | ENSG00000256684 | 1709  |
| chr11 | 1.02E+08 | 1.02E+08 | 396 | Promoter (1-2kb)  | ENSG00000260008 | -1971 |
| chr11 | 1.02E+08 | 1.02E+08 | 396 | Distal Intergenic | ENSG00000255337 | -4737 |
| chr11 | 1.02E+08 | 1.02E+08 | 360 | Promoter (<=1kb)  | ENSG00000256916 | -386  |
| chr11 | 1.02E+08 | 1.02E+08 | 396 | Promoter (<=1kb)  | ENSG00000256916 | -318  |
| chr11 | 1.02E+08 | 1.02E+08 | 360 | Promoter (<=1kb)  | ENSG00000256916 | -186  |
| chr11 | 1.07E+08 | 1.07E+08 | 360 | Promoter (<=1kb)  | ENSG00000261098 | -905  |
| chr11 | 1.08E+08 | 1.08E+08 | 360 | Promoter (<=1kb)  | ENSG00000255467 | -851  |
| chr11 | 1.1E+08  | 1.1E+08  | 396 | Distal Intergenic | ENSG00000254416 | -4981 |
| chr11 | 1.11E+08 | 1.11E+08 | 396 | Promoter (1-2kb)  | ENSG00000255428 | 1792  |
| chr11 | 1.11E+08 | 1.11E+08 | 396 | Promoter (1-2kb)  | ENSG00000255428 | 1019  |
| chr11 | 1.11E+08 | 1.11E+08 | 396 | Promoter (<=1kb)  | ENSG00000255208 | 614   |
| chr11 | 1.11E+08 | 1.11E+08 | 360 | Promoter (2-3kb)  | ENSG00000254980 | 2020  |
| chr11 | 1.11E+08 | 1.11E+08 | 396 | Promoter (1-2kb)  | ENSG00000254980 | 1903  |
| chr11 | 1.11E+08 | 1.11E+08 | 396 | Promoter (<=1kb)  | ENSG00000254980 | 224   |
| chr11 | 1.11E+08 | 1.11E+08 | 396 | Promoter (1-2kb)  | ENSG00000254980 | -1522 |
| chr11 | 1.11E+08 | 1.11E+08 | 396 | Promoter (1-2kb)  | ENSG00000254980 | -1751 |
| chr11 | 1.12E+08 | 1.12E+08 | 360 | Distal Intergenic | ENSG00000250303 | -3492 |
| chr11 | 1.12E+08 | 1.12E+08 | 396 | Promoter (2-3kb)  | ENSG00000250303 | 2572  |
| chr11 | 1.12E+08 | 1.12E+08 | 396 | Promoter (2-3kb)  | ENSG00000250303 | 2777  |
| chr11 | 1.16E+08 | 1.16E+08 | 396 | Promoter (1-2kb)  | ENSG00000255599 | 1842  |
| chr11 | 1.16E+08 | 1.16E+08 | 360 | Distal Intergenic | ENSG00000260254 | -3335 |
| chr11 | 1.16E+08 | 1.16E+08 | 396 | Promoter (2-3kb)  | ENSG00000260254 | -2743 |
| chr11 | 1.16E+08 | 1.16E+08 | 396 | Promoter (<=1kb)  | ENSG00000260254 | 0     |
| chr11 | 1.17E+08 | 1.17E+08 | 396 | Promoter (2-3kb)  | ENSG00000226645 | -2537 |
| chr11 | 1.17E+08 | 1.17E+08 | 396 | Promoter (2-3kb)  | ENSG00000226645 | -2203 |
| chr11 | 1.17E+08 | 1.17E+08 | 360 | Promoter (<=1kb)  | ENSG00000250699 | 237   |
| chr11 | 1.18E+08 | 1.18E+08 | 360 | Promoter (1-2kb)  | ENSG00000254528 | 1828  |
| chr11 | 1.19E+08 | 1.19E+08 | 396 | Distal Intergenic | ENSG00000255422 | -4132 |
| chr11 | 1.19E+08 | 1.19E+08 | 360 | Distal Intergenic | ENSG00000255422 | -3021 |

|       |          |          |     |                   |                 |       |
|-------|----------|----------|-----|-------------------|-----------------|-------|
| chr11 | 1.19E+08 | 1.19E+08 | 396 | Promoter (2-3kb)  | ENSG00000255422 | -2535 |
| chr11 | 1.19E+08 | 1.19E+08 | 396 | Promoter (2-3kb)  | ENSG00000255422 | -2224 |
| chr11 | 1.19E+08 | 1.19E+08 | 396 | Promoter (<=1kb)  | ENSG00000255422 | -634  |
| chr11 | 1.19E+08 | 1.19E+08 | 360 | Promoter (<=1kb)  | ENSG00000255422 | -226  |
| chr11 | 1.19E+08 | 1.19E+08 | 360 | Promoter (1-2kb)  | ENSG00000255121 | -1372 |
| chr11 | 1.19E+08 | 1.19E+08 | 360 | Promoter (1-2kb)  | ENSG00000255121 | -1572 |
| chr11 | 1.19E+08 | 1.19E+08 | 360 | Distal Intergenic | ENSG00000255114 | -4339 |
| chr11 | 1.19E+08 | 1.19E+08 | 360 | Distal Intergenic | ENSG00000245385 | -4258 |
| chr11 | 1.19E+08 | 1.19E+08 | 360 | Promoter (1-2kb)  | ENSG00000245248 | 1388  |
| chr11 | 1.19E+08 | 1.19E+08 | 396 | Promoter (<=1kb)  | ENSG00000254561 | 932   |
| chr11 | 1.19E+08 | 1.19E+08 | 396 | Promoter (2-3kb)  | ENSG00000254561 | 2225  |
| chr11 | 1.19E+08 | 1.19E+08 | 360 | Promoter (2-3kb)  | ENSG00000254561 | 2299  |
| chr11 | 1.2E+08  | 1.2E+08  | 360 | Distal Intergenic | ENSG00000259541 | -4925 |
| chr11 | 1.21E+08 | 1.21E+08 | 360 | Promoter (1-2kb)  | ENSG00000246790 | 1525  |
| chr11 | 1.22E+08 | 1.22E+08 | 396 | Promoter (2-3kb)  | ENSG00000255248 | 2162  |
| chr11 | 1.23E+08 | 1.23E+08 | 396 | Promoter (2-3kb)  | ENSG00000254710 | 2390  |
| chr11 | 1.23E+08 | 1.23E+08 | 360 | Promoter (2-3kb)  | ENSG00000254710 | 2477  |
| chr11 | 1.23E+08 | 1.23E+08 | 396 | Promoter (2-3kb)  | ENSG00000254710 | 2591  |
| chr11 | 1.25E+08 | 1.25E+08 | 396 | Promoter (1-2kb)  | ENSG00000254932 | 1605  |
| chr11 | 1.26E+08 | 1.26E+08 | 360 | Promoter (1-2kb)  | ENSG00000255027 | -1517 |
| chr11 | 1.26E+08 | 1.26E+08 | 396 | Distal Intergenic | ENSG00000254833 | -3099 |
| chr11 | 1.26E+08 | 1.26E+08 | 360 | Promoter (2-3kb)  | ENSG00000254833 | -2824 |
| chr11 | 1.26E+08 | 1.26E+08 | 360 | Promoter (<=1kb)  | ENSG00000254694 | -751  |
| chr11 | 1.26E+08 | 1.26E+08 | 396 | Promoter (<=1kb)  | ENSG00000254694 | -827  |
| chr11 | 1.26E+08 | 1.26E+08 | 396 | Promoter (1-2kb)  | ENSG00000254694 | -1027 |
| chr11 | 1.26E+08 | 1.26E+08 | 396 | Promoter (<=1kb)  | ENSG00000254905 | 285   |
| chr11 | 1.26E+08 | 1.26E+08 | 396 | Promoter (<=1kb)  | ENSG00000254905 | -368  |
| chr11 | 1.27E+08 | 1.27E+08 | 360 | Promoter (1-2kb)  | ENSG00000272981 | 1213  |
| chr11 | 1.27E+08 | 1.27E+08 | 396 | Distal Intergenic | ENSG00000272642 | -3900 |
| chr11 | 1.3E+08  | 1.3E+08  | 396 | Promoter (2-3kb)  | ENSG00000175773 | -2672 |
| chr11 | 1.3E+08  | 1.3E+08  | 360 | Promoter (2-3kb)  | ENSG00000175773 | -2658 |
| chr11 | 1.3E+08  | 1.3E+08  | 396 | Promoter (1-2kb)  | ENSG00000175773 | -1771 |
| chr11 | 1.31E+08 | 1.31E+08 | 396 | Promoter (1-2kb)  | ENSG00000236129 | 1802  |
| chr12 | 66860    | 67255    | 396 | Promoter (<=1kb)  | ENSG00000249054 | -352  |
| chr12 | 66892    | 67251    | 360 | Promoter (<=1kb)  | ENSG00000249054 | -356  |
| chr12 | 67061    | 67456    | 396 | Promoter (<=1kb)  | ENSG00000249054 | -151  |
| chr12 | 219714   | 220073   | 360 | Promoter (<=1kb)  | ENSG00000256948 | 943   |
| chr12 | 365355   | 365750   | 396 | Promoter (<=1kb)  | ENSG00000255746 | 715   |
| chr12 | 388672   | 389031   | 360 | Promoter (2-3kb)  | ENSG00000261799 | -2383 |
| chr12 | 389571   | 389930   | 360 | Distal Intergenic | ENSG00000261799 | -3282 |
| chr12 | 740830   | 741225   | 396 | Promoter (<=1kb)  | ENSG00000177406 | 773   |
| chr12 | 751130   | 751525   | 396 | Promoter (<=1kb)  | ENSG00000177406 | -315  |
| chr12 | 751136   | 751495   | 360 | Promoter (<=1kb)  | ENSG00000177406 | -345  |
| chr12 | 751385   | 751780   | 396 | Promoter (<=1kb)  | ENSG00000177406 | -60   |
| chr12 | 754464   | 754823   | 360 | Promoter (2-3kb)  | ENSG00000177406 | 2317  |
| chr12 | 2797701  | 2798060  | 360 | Promoter (2-3kb)  | ENSG00000246627 | 2224  |
| chr12 | 2798634  | 2798993  | 360 | Promoter (1-2kb)  | ENSG00000246627 | 1291  |
| chr12 | 2798845  | 2799204  | 360 | Promoter (1-2kb)  | ENSG00000246627 | 1080  |
| chr12 | 2877224  | 2877583  | 360 | Promoter (2-3kb)  | ENSG00000255669 | 2038  |
| chr12 | 2877714  | 2878073  | 360 | Promoter (1-2kb)  | ENSG00000255669 | 1548  |
| chr12 | 2877806  | 2878201  | 396 | Promoter (1-2kb)  | ENSG00000255669 | 1420  |
| chr12 | 2878162  | 2878521  | 360 | Promoter (1-2kb)  | ENSG00000255669 | 1100  |
| chr12 | 3423244  | 3423639  | 396 | Distal Intergenic | ENSG00000236908 | -4245 |
| chr12 | 4010028  | 4010387  | 360 | Promoter (1-2kb)  | ENSG00000256862 | 1809  |
| chr12 | 4010277  | 4010636  | 360 | Promoter (2-3kb)  | ENSG00000256862 | 2058  |
| chr12 | 4015242  | 4015601  | 360 | Promoter (<=1kb)  | ENSG00000256862 | 856   |
| chr12 | 4015316  | 4015711  | 396 | Promoter (<=1kb)  | ENSG00000256862 | 930   |
| chr12 | 4016254  | 4016649  | 396 | Promoter (1-2kb)  | ENSG00000256862 | 1868  |

|       |          |          |     |                    |                 |       |
|-------|----------|----------|-----|--------------------|-----------------|-------|
| chr12 | 4016521  | 4016916  | 396 | Promoter (2-3kb)   | ENSG00000256862 | 2135  |
| chr12 | 6274753  | 6275112  | 360 | Distal Intergenic  | ENSG00000255775 | -4868 |
| chr12 | 6501684  | 6502043  | 360 | Promoter (1-2kb)   | ENSG00000256433 | -1028 |
| chr12 | 6554056  | 6554415  | 360 | Promoter (2-3kb)   | ENSG00000215039 | 2524  |
| chr12 | 6554554  | 6554913  | 360 | Promoter (2-3kb)   | ENSG00000215039 | 2026  |
| chr12 | 6554754  | 6555113  | 360 | Promoter (1-2kb)   | ENSG00000215039 | 1826  |
| chr12 | 6556118  | 6556513  | 396 | Promoter (<=1kb)   | ENSG00000215039 | 426   |
| chr12 | 6614280  | 6614675  | 396 | Distal Intergenic  | ENSG00000239002 | -4713 |
| chr12 | 6644297  | 6644692  | 396 | Promoter (1-2kb)   | ENSG00000255966 | -1633 |
| chr12 | 6644510  | 6644905  | 396 | Promoter (1-2kb)   | ENSG00000255966 | -1846 |
| chr12 | 6688928  | 6689287  | 360 | Promoter (1-2kb)   | ENSG00000247853 | 1140  |
| chr12 | 6689249  | 6689644  | 396 | Promoter (1-2kb)   | ENSG00000247853 | 1461  |
| chr12 | 6775804  | 6776199  | 396 | Promoter (<=1kb)   | ENSG00000219410 | -995  |
| chr12 | 6776023  | 6776418  | 396 | Promoter (<=1kb)   | ENSG00000219410 | -776  |
| chr12 | 6778986  | 6779381  | 396 | Promoter (1-2kb)   | ENSG00000219410 | 1792  |
| chr12 | 6827353  | 6827712  | 360 | Distal Intergenic  | ENSG00000270068 | -4687 |
| chr12 | 6829444  | 6829839  | 396 | Promoter (2-3kb)   | ENSG00000270068 | -2560 |
| chr12 | 6829475  | 6829834  | 360 | Promoter (2-3kb)   | ENSG00000270068 | -2565 |
| chr12 | 6851710  | 6852105  | 396 | Promoter (<=1kb)   | ENSG00000269892 | -46   |
| chr12 | 6852273  | 6852668  | 396 | Promoter (<=1kb)   | ENSG00000269892 | 122   |
| chr12 | 6853582  | 6853977  | 396 | Promoter (1-2kb)   | ENSG00000269892 | 1431  |
| chr12 | 7052790  | 7053185  | 396 | Promoter (<=1kb)   | ENSG00000272173 | 582   |
| chr12 | 7072792  | 7073151  | 360 | Promoter (<=1kb)   | ENSG00000257084 | 383   |
| chr12 | 8335749  | 8336144  | 396 | Promoter (2-3kb)   | ENSG00000226711 | 2884  |
| chr12 | 10365875 | 10366270 | 396 | Promoter (1-2kb)   | ENSG00000255958 | 1090  |
| chr12 | 10366074 | 10366469 | 396 | Promoter (<=1kb)   | ENSG00000255958 | 891   |
| chr12 | 11711078 | 11711437 | 360 | Promoter (1-2kb)   | ENSG00000247157 | 1178  |
| chr12 | 12633863 | 12634222 | 360 | Distal Intergenic  | ENSG00000255670 | -4065 |
| chr12 | 12635147 | 12635506 | 360 | Promoter (2-3kb)   | ENSG00000255670 | -2781 |
| chr12 | 12819500 | 12819895 | 396 | Promoter (2-3kb)   | ENSG00000257004 | -2021 |
| chr12 | 12819705 | 12820100 | 396 | Promoter (1-2kb)   | ENSG00000257004 | -1816 |
| chr12 | 13101363 | 13101758 | 396 | Promoter (1-2kb)   | ENSG00000247498 | 1264  |
| chr12 | 14366026 | 14366421 | 396 | Distal Intergenic  | ENSG00000256084 | -3103 |
| chr12 | 24857761 | 24858120 | 360 | Promoter (<=1kb)   | ENSG00000255745 | 262   |
| chr12 | 26109237 | 26109596 | 360 | Promoter (<=1kb)   | ENSG00000246695 | 922   |
| chr12 | 26114366 | 26114761 | 396 | Promoter (1-2kb)   | ENSG00000246695 | -1668 |
| chr12 | 26114463 | 26114822 | 360 | Promoter (1-2kb)   | ENSG00000246695 | -1765 |
| chr12 | 26276055 | 26276450 | 396 | Promoter (2-3kb)   | ENSG00000256894 | 2567  |
| chr12 | 26468868 | 26469263 | 396 | Promoter (<=1kb)   | ENSG00000255858 | 220   |
| chr12 | 27709775 | 27710134 | 360 | Distal Intergenic  | ENSG00000248100 | -4069 |
| chr12 | 27710699 | 27711094 | 396 | Distal Intergenic  | ENSG00000248100 | -4993 |
| chr12 | 30469079 | 30469474 | 396 | Distal Intergenic  | ENSG00000257932 | -4293 |
| chr12 | 30469297 | 30469692 | 396 | Distal Intergenic  | ENSG00000257932 | -4075 |
| chr12 | 31229407 | 31229766 | 360 | Promoter (2-3kb)   | ENSG00000245614 | -2626 |
| chr12 | 32261969 | 32262328 | 360 | Promoter (1-2kb)   | ENSG00000257530 | -1507 |
| chr12 | 42323975 | 42324334 | 360 | Promoter (2-3kb)   | ENSG00000257239 | 2060  |
| chr12 | 42325707 | 42326066 | 360 | Promoter (<=1kb)   | ENSG00000257239 | 328   |
| chr12 | 42325921 | 42326280 | 360 | Promoter (<=1kb)   | ENSG00000257239 | 114   |
| chr12 | 42326881 | 42327276 | 396 | Promoter (<=1kb)   | ENSG00000257239 | -487  |
| chr12 | 46124787 | 46125182 | 396 | Distal Intergenic  | ENSG00000273015 | -3229 |
| chr12 | 46125068 | 46125463 | 396 | Distal Intergenic  | ENSG00000273015 | -3510 |
| chr12 | 46783265 | 46783660 | 396 | Promoter (2-3kb)   | ENSG00000257496 | -2491 |
| chr12 | 46930153 | 46930548 | 396 | Promoter (<=1kb)   | ENSG00000272369 | -737  |
| chr12 | 46930769 | 46931164 | 396 | Promoter (<=1kb)   | ENSG00000272369 | -121  |
| chr12 | 47636848 | 47637207 | 360 | Intron (ENST000005 | ENSG00000258181 | -4700 |
| chr12 | 47742584 | 47742943 | 360 | Distal Intergenic  | ENSG00000257924 | -4594 |
| chr12 | 47807912 | 47808271 | 360 | Promoter (<=1kb)   | ENSG00000257906 | -520  |
| chr12 | 48106188 | 48106547 | 360 | Intron (ENST000005 | ENSG00000257433 | -4827 |



|       |          |          |     |                      |                 |       |
|-------|----------|----------|-----|----------------------|-----------------|-------|
| chr12 | 48678650 | 48679045 | 396 | Promoter (<=1kb)     | ENSG00000258234 | -657  |
| chr12 | 48680384 | 48680743 | 360 | Promoter (2-3kb)     | ENSG00000258234 | -2391 |
| chr12 | 48681634 | 48681993 | 360 | Distal Intergenic    | ENSG00000258234 | -3641 |
| chr12 | 48681861 | 48682220 | 360 | Distal Intergenic    | ENSG00000258234 | -3868 |
| chr12 | 48681940 | 48682335 | 396 | Distal Intergenic    | ENSG00000258234 | -3947 |
| chr12 | 48682282 | 48682677 | 396 | Distal Intergenic    | ENSG00000258234 | -4289 |
| chr12 | 48682440 | 48682799 | 360 | Distal Intergenic    | ENSG00000258234 | -4447 |
| chr12 | 49665490 | 49665885 | 396 | Promoter (1-2kb)     | ENSG00000258232 | 1204  |
| chr12 | 49974258 | 49974617 | 360 | Promoter (2-3kb)     | ENSG00000257964 | -2970 |
| chr12 | 50325811 | 50326170 | 360 | Promoter (2-3kb)     | ENSG00000257771 | 2630  |
| chr12 | 50504865 | 50505260 | 396 | Promoter (<=1kb)     | ENSG00000272368 | -720  |
| chr12 | 50505754 | 50506149 | 396 | Promoter (<=1kb)     | ENSG00000272368 | 0     |
| chr12 | 50505796 | 50506155 | 360 | Promoter (<=1kb)     | ENSG00000272368 | 0     |
| chr12 | 50508305 | 50508700 | 396 | Promoter (2-3kb)     | ENSG00000272368 | 2268  |
| chr12 | 52213324 | 52213719 | 396 | Promoter (1-2kb)     | ENSG00000261586 | 1641  |
| chr12 | 52213551 | 52213946 | 396 | Promoter (1-2kb)     | ENSG00000261586 | 1868  |
| chr12 | 52990676 | 52991071 | 396 | Distal Intergenic    | ENSG00000257495 | -4180 |
| chr12 | 53441180 | 53441575 | 396 | Promoter (<=1kb)     | ENSG00000257337 | -346  |
| chr12 | 53441394 | 53441753 | 360 | Promoter (<=1kb)     | ENSG00000257337 | -560  |
| chr12 | 53441711 | 53442106 | 396 | Promoter (<=1kb)     | ENSG00000257337 | -877  |
| chr12 | 53451763 | 53452122 | 360 | Distal Intergenic    | ENSG00000257337 | -3541 |
| chr12 | 53451801 | 53452196 | 396 | Distal Intergenic    | ENSG00000257337 | -3579 |
| chr12 | 53452011 | 53452406 | 396 | Distal Intergenic    | ENSG00000257337 | -3789 |
| chr12 | 53452336 | 53452731 | 396 | Distal Intergenic    | ENSG00000257337 | -4114 |
| chr12 | 53452348 | 53452707 | 360 | Distal Intergenic    | ENSG00000257337 | -4126 |
| chr12 | 54337319 | 54337714 | 396 | Distal Intergenic    | ENSG00000249641 | -3892 |
| chr12 | 54351692 | 54352051 | 360 | Promoter (1-2kb)     | ENSG00000271090 | 1374  |
| chr12 | 54359497 | 54359856 | 360 | Promoter (<=1kb)     | ENSG00000228630 | 558   |
| chr12 | 54368528 | 54368887 | 360 | Promoter (<=1kb)     | ENSG00000228630 | 0     |
| chr12 | 54475433 | 54475792 | 360 | Promoter (<=1kb)     | ENSG00000249388 | -110  |
| chr12 | 55876358 | 55876753 | 396 | Intron (ENST0000051) | ENSG00000258763 | -3102 |
| chr12 | 55883991 | 55884350 | 360 | Promoter (2-3kb)     | ENSG00000258763 | 2613  |
| chr12 | 56117605 | 56118000 | 396 | Distal Intergenic    | ENSG00000258056 | -4888 |
| chr12 | 56117874 | 56118269 | 396 | Distal Intergenic    | ENSG00000258056 | -4619 |
| chr12 | 56119024 | 56119383 | 360 | Distal Intergenic    | ENSG00000258056 | -3505 |
| chr12 | 56124459 | 56124854 | 396 | Promoter (1-2kb)     | ENSG00000258056 | 1571  |
| chr12 | 56124674 | 56125069 | 396 | Promoter (1-2kb)     | ENSG00000258056 | 1786  |
| chr12 | 56125197 | 56125556 | 360 | Promoter (2-3kb)     | ENSG00000258056 | 2309  |
| chr12 | 56158124 | 56158519 | 396 | Promoter (1-2kb)     | ENSG00000257509 | -1712 |
| chr12 | 56158288 | 56158647 | 360 | Promoter (1-2kb)     | ENSG00000257509 | -1876 |
| chr12 | 56158557 | 56158952 | 396 | Promoter (2-3kb)     | ENSG00000257509 | -2145 |
| chr12 | 56159484 | 56159843 | 360 | Distal Intergenic    | ENSG00000257509 | -3072 |
| chr12 | 56359186 | 56359581 | 396 | Promoter (1-2kb)     | ENSG00000258554 | 1677  |
| chr12 | 56360017 | 56360376 | 360 | Promoter (<=1kb)     | ENSG00000258554 | 882   |
| chr12 | 56362023 | 56362418 | 396 | Promoter (<=1kb)     | ENSG00000258554 | -765  |
| chr12 | 56362560 | 56362955 | 396 | Promoter (1-2kb)     | ENSG00000258554 | -1302 |
| chr12 | 56522216 | 56522611 | 396 | Promoter (<=1kb)     | ENSG00000258317 | 27    |
| chr12 | 59804228 | 59804587 | 360 | Promoter (<=1kb)     | ENSG00000258214 | 365   |
| chr12 | 60482031 | 60482426 | 396 | Distal Intergenic    | ENSG00000257294 | -4219 |
| chr12 | 64193732 | 64194091 | 360 | Distal Intergenic    | ENSG00000249753 | -4234 |
| chr12 | 65018627 | 65019022 | 396 | Distal Intergenic    | ENSG00000225195 | -3102 |
| chr12 | 65278994 | 65279353 | 360 | Promoter (1-2kb)     | ENSG00000255693 | 1440  |
| chr12 | 65929907 | 65930302 | 396 | Promoter (2-3kb)     | ENSG00000250748 | 2177  |
| chr12 | 65929997 | 65930356 | 360 | Promoter (2-3kb)     | ENSG00000250748 | 2123  |
| chr12 | 65955376 | 65955735 | 360 | Promoter (2-3kb)     | ENSG00000255866 | 2005  |
| chr12 | 65955564 | 65955959 | 396 | Promoter (2-3kb)     | ENSG00000255866 | 2193  |
| chr12 | 66650838 | 66651233 | 396 | Promoter (<=1kb)     | ENSG00000256072 | 0     |
| chr12 | 66653101 | 66653496 | 396 | Promoter (1-2kb)     | ENSG00000256072 | -1887 |

|       |          |          |     |                    |                 |       |
|-------|----------|----------|-----|--------------------|-----------------|-------|
| chr12 | 68827488 | 68827883 | 396 | Promoter (1-2kb)   | ENSG00000251301 | -1054 |
| chr12 | 68828988 | 68829347 | 360 | Promoter (2-3kb)   | ENSG00000251301 | -2554 |
| chr12 | 68830212 | 68830607 | 396 | Intron (ENST000005 | ENSG00000251301 | -3778 |
| chr12 | 68846321 | 68846680 | 360 | Promoter (<=1kb)   | ENSG00000251301 | -878  |
| chr12 | 68847652 | 68848047 | 396 | Promoter (2-3kb)   | ENSG00000251301 | -2209 |
| chr12 | 69238202 | 69238561 | 360 | Promoter (1-2kb)   | ENSG00000257181 | -1185 |
| chr12 | 69746654 | 69747049 | 396 | Promoter (<=1kb)   | ENSG00000257764 | 956   |
| chr12 | 72654316 | 72654711 | 396 | Promoter (2-3kb)   | ENSG00000236333 | -2296 |
| chr12 | 74930923 | 74931282 | 360 | Promoter (1-2kb)   | ENSG00000257386 | 1131  |
| chr12 | 75623793 | 75624188 | 396 | Distal Intergenic  | ENSG00000254451 | -4332 |
| chr12 | 75625002 | 75625397 | 396 | Distal Intergenic  | ENSG00000254451 | -3123 |
| chr12 | 75625204 | 75625599 | 396 | Promoter (2-3kb)   | ENSG00000254451 | -2921 |
| chr12 | 76084232 | 76084627 | 396 | Promoter (1-2kb)   | ENSG00000258077 | 1511  |
| chr12 | 76084439 | 76084798 | 360 | Promoter (1-2kb)   | ENSG00000258077 | 1340  |
| chr12 | 76084915 | 76085274 | 360 | Promoter (<=1kb)   | ENSG00000258077 | 864   |
| chr12 | 78834354 | 78834749 | 396 | Promoter (1-2kb)   | ENSG00000257879 | 1983  |
| chr12 | 79934616 | 79934975 | 360 | Promoter (<=1kb)   | ENSG00000257474 | 633   |
| chr12 | 79934622 | 79935017 | 396 | Promoter (<=1kb)   | ENSG00000257474 | 639   |
| chr12 | 79935150 | 79935545 | 396 | Promoter (<=1kb)   | ENSG00000257474 | -441  |
| chr12 | 81768863 | 81769258 | 396 | Promoter (2-3kb)   | ENSG00000258162 | -2563 |
| chr12 | 81810501 | 81810896 | 396 | Promoter (<=1kb)   | ENSG00000258162 | -144  |
| chr12 | 85660004 | 85660363 | 360 | Promoter (2-3kb)   | ENSG00000269916 | 2682  |
| chr12 | 89708187 | 89708582 | 396 | Distal Intergenic  | ENSG00000257156 | -4857 |
| chr12 | 89708329 | 89708688 | 360 | Distal Intergenic  | ENSG00000257156 | -4999 |
| chr12 | 90499918 | 90500313 | 396 | Promoter (1-2kb)   | ENSG00000257194 | -1203 |
| chr12 | 92069625 | 92069984 | 360 | Distal Intergenic  | ENSG00000258125 | -3924 |
| chr12 | 92069848 | 92070207 | 360 | Distal Intergenic  | ENSG00000258125 | -3701 |
| chr12 | 92071030 | 92071425 | 396 | Promoter (2-3kb)   | ENSG00000258125 | -2483 |
| chr12 | 92071126 | 92071485 | 360 | Promoter (2-3kb)   | ENSG00000258125 | -2423 |
| chr12 | 92071247 | 92071642 | 396 | Promoter (2-3kb)   | ENSG00000258125 | -2266 |
| chr12 | 92072389 | 92072748 | 360 | Promoter (1-2kb)   | ENSG00000258125 | -1160 |
| chr12 | 92539055 | 92539414 | 360 | Promoter (<=1kb)   | ENSG00000245904 | 0     |
| chr12 | 93393819 | 93394178 | 360 | Promoter (<=1kb)   | ENSG00000257345 | 825   |
| chr12 | 93563765 | 93564124 | 360 | Intron (ENST000005 | ENSG00000258171 | -4018 |
| chr12 | 93563789 | 93564184 | 396 | Intron (ENST000005 | ENSG00000258171 | -3958 |
| chr12 | 93570736 | 93571095 | 360 | Promoter (2-3kb)   | ENSG00000258171 | 2594  |
| chr12 | 93570942 | 93571301 | 360 | Promoter (2-3kb)   | ENSG00000258171 | 2800  |
| chr12 | 94573518 | 94573913 | 396 | Intron (ENST000005 | ENSG00000258035 | -3338 |
| chr12 | 95796470 | 95796865 | 396 | Promoter (2-3kb)   | ENSG00000257583 | 2415  |
| chr12 | 95796647 | 95797006 | 360 | Promoter (2-3kb)   | ENSG00000257583 | 2274  |
| chr12 | 95800438 | 95800797 | 360 | Promoter (1-2kb)   | ENSG00000257583 | -1158 |
| chr12 | 95802339 | 95802734 | 396 | Intron (ENST000005 | ENSG00000257583 | -3059 |
| chr12 | 95802840 | 95803235 | 396 | Intron (ENST000005 | ENSG00000257583 | -3560 |
| chr12 | 96253327 | 96253686 | 360 | Promoter (<=1kb)   | ENSG00000258343 | -710  |
| chr12 | 96421099 | 96421494 | 396 | Promoter (1-2kb)   | ENSG00000257715 | 1998  |
| chr12 | 1.01E+08 | 1.01E+08 | 396 | Promoter (2-3kb)   | ENSG00000257696 | 2969  |
| chr12 | 1.01E+08 | 1.01E+08 | 396 | Promoter (2-3kb)   | ENSG00000257325 | -2046 |
| chr12 | 1.04E+08 | 1.04E+08 | 396 | Promoter (1-2kb)   | ENSG00000257766 | -1893 |
| chr12 | 1.04E+08 | 1.04E+08 | 396 | Promoter (2-3kb)   | ENSG00000257766 | -2092 |
| chr12 | 1.05E+08 | 1.05E+08 | 360 | Promoter (2-3kb)   | ENSG00000257886 | -2566 |
| chr12 | 1.07E+08 | 1.07E+08 | 360 | Promoter (2-3kb)   | ENSG00000257711 | -2875 |
| chr12 | 1.07E+08 | 1.07E+08 | 396 | Promoter (<=1kb)   | ENSG00000260329 | 0     |
| chr12 | 1.07E+08 | 1.07E+08 | 360 | Promoter (<=1kb)   | ENSG00000260329 | 0     |
| chr12 | 1.07E+08 | 1.07E+08 | 396 | Promoter (<=1kb)   | ENSG00000260329 | -109  |
| chr12 | 1.07E+08 | 1.07E+08 | 360 | Promoter (<=1kb)   | ENSG00000260329 | -172  |
| chr12 | 1.07E+08 | 1.07E+08 | 396 | Promoter (2-3kb)   | ENSG00000260329 | -2972 |
| chr12 | 1.07E+08 | 1.07E+08 | 396 | Distal Intergenic  | ENSG00000260329 | -3189 |
| chr12 | 1.09E+08 | 1.09E+08 | 396 | Promoter (1-2kb)   | ENSG00000247213 | 1555  |

|       |          |          |     |                   |                 |       |
|-------|----------|----------|-----|-------------------|-----------------|-------|
| chr12 | 1.09E+08 | 1.09E+08 | 396 | Promoter (1-2kb)  | ENSG00000247213 | 1350  |
| chr12 | 1.09E+08 | 1.09E+08 | 396 | Promoter (1-2kb)  | ENSG00000257221 | -1963 |
| chr12 | 1.09E+08 | 1.09E+08 | 360 | Promoter (1-2kb)  | ENSG00000257221 | -1365 |
| chr12 | 1.09E+08 | 1.09E+08 | 396 | Promoter (1-2kb)  | ENSG00000257221 | -1315 |
| chr12 | 1.09E+08 | 1.09E+08 | 360 | Promoter (1-2kb)  | ENSG00000260987 | 1308  |
| chr12 | 1.09E+08 | 1.09E+08 | 396 | Promoter (2-3kb)  | ENSG00000256262 | -2328 |
| chr12 | 1.1E+08  | 1.1E+08  | 360 | Distal Intergenic | ENSG00000256560 | -4977 |
| chr12 | 1.1E+08  | 1.1E+08  | 360 | Promoter (1-2kb)  | ENSG00000255650 | 1702  |
| chr12 | 1.1E+08  | 1.1E+08  | 360 | Distal Intergenic | ENSG00000249094 | -3915 |
| chr12 | 1.1E+08  | 1.1E+08  | 396 | Promoter (2-3kb)  | ENSG00000249094 | 2234  |
| chr12 | 1.11E+08 | 1.11E+08 | 396 | Distal Intergenic | ENSG00000258210 | -4040 |
| chr12 | 1.11E+08 | 1.11E+08 | 396 | Distal Intergenic | ENSG00000258210 | -4320 |
| chr12 | 1.11E+08 | 1.11E+08 | 360 | Distal Intergenic | ENSG00000258210 | -4387 |
| chr12 | 1.11E+08 | 1.11E+08 | 360 | Promoter (2-3kb)  | ENSG00000258240 | -2701 |
| chr12 | 1.15E+08 | 1.15E+08 | 360 | Promoter (2-3kb)  | ENSG00000257476 | 2460  |
| chr12 | 1.15E+08 | 1.15E+08 | 360 | Promoter (<=1kb)  | ENSG00000257476 | 957   |
| chr12 | 1.15E+08 | 1.15E+08 | 360 | Promoter (<=1kb)  | ENSG00000257476 | 754   |
| chr12 | 1.15E+08 | 1.15E+08 | 360 | Distal Intergenic | ENSG00000257476 | -4569 |
| chr12 | 1.15E+08 | 1.15E+08 | 396 | Distal Intergenic | ENSG00000257476 | -4753 |
| chr12 | 1.16E+08 | 1.16E+08 | 396 | Promoter (<=1kb)  | ENSG00000257519 | -427  |
| chr12 | 1.16E+08 | 1.16E+08 | 396 | Promoter (<=1kb)  | ENSG00000257519 | 441   |
| chr12 | 1.16E+08 | 1.16E+08 | 396 | Promoter (<=1kb)  | ENSG00000257407 | -950  |
| chr12 | 1.16E+08 | 1.16E+08 | 396 | Promoter (1-2kb)  | ENSG00000257407 | -1160 |
| chr12 | 1.16E+08 | 1.16E+08 | 360 | Promoter (2-3kb)  | ENSG00000257781 | 2017  |
| chr12 | 1.17E+08 | 1.17E+08 | 360 | Promoter (2-3kb)  | ENSG00000257883 | -2154 |
| chr12 | 1.17E+08 | 1.17E+08 | 360 | Promoter (1-2kb)  | ENSG00000257883 | -1879 |
| chr12 | 1.17E+08 | 1.17E+08 | 396 | Promoter (<=1kb)  | ENSG00000257883 | -784  |
| chr12 | 1.17E+08 | 1.17E+08 | 396 | Promoter (<=1kb)  | ENSG00000257883 | -474  |
| chr12 | 1.17E+08 | 1.17E+08 | 360 | Promoter (<=1kb)  | ENSG00000257883 | -270  |
| chr12 | 1.17E+08 | 1.17E+08 | 360 | Promoter (<=1kb)  | ENSG00000257883 | 249   |
| chr12 | 1.17E+08 | 1.17E+08 | 396 | Promoter (<=1kb)  | ENSG00000257883 | 268   |
| chr12 | 1.17E+08 | 1.17E+08 | 396 | Promoter (<=1kb)  | ENSG00000257883 | 484   |
| chr12 | 1.17E+08 | 1.17E+08 | 360 | Promoter (<=1kb)  | ENSG00000257883 | 503   |
| chr12 | 1.17E+08 | 1.17E+08 | 360 | Distal Intergenic | ENSG00000257279 | -4330 |
| chr12 | 1.2E+08  | 1.2E+08  | 360 | Promoter (1-2kb)  | ENSG00000256311 | 1178  |
| chr12 | 1.2E+08  | 1.2E+08  | 396 | Promoter (1-2kb)  | ENSG00000248636 | 1782  |
| chr12 | 1.21E+08 | 1.21E+08 | 396 | Promoter (2-3kb)  | ENSG00000256695 | 2238  |
| chr12 | 1.21E+08 | 1.21E+08 | 396 | Promoter (2-3kb)  | ENSG00000256695 | 2537  |
| chr12 | 1.21E+08 | 1.21E+08 | 360 | Distal Intergenic | ENSG00000255946 | -4242 |
| chr12 | 1.21E+08 | 1.21E+08 | 396 | Distal Intergenic | ENSG00000271769 | -4114 |
| chr12 | 1.22E+08 | 1.22E+08 | 396 | Promoter (1-2kb)  | ENSG00000261827 | 1617  |
| chr12 | 1.22E+08 | 1.22E+08 | 360 | Promoter (1-2kb)  | ENSG00000261827 | 1686  |
| chr12 | 1.22E+08 | 1.22E+08 | 396 | Promoter (2-3kb)  | ENSG00000261827 | 2597  |
| chr12 | 1.22E+08 | 1.22E+08 | 396 | Promoter (2-3kb)  | ENSG00000261827 | 2798  |
| chr12 | 1.23E+08 | 1.23E+08 | 360 | Promoter (<=1kb)  | ENSG00000256546 | -850  |
| chr12 | 1.23E+08 | 1.23E+08 | 396 | Promoter (<=1kb)  | ENSG00000256546 | -20   |
| chr12 | 1.23E+08 | 1.23E+08 | 396 | Promoter (<=1kb)  | ENSG00000256546 | 0     |
| chr12 | 1.23E+08 | 1.23E+08 | 396 | Promoter (1-2kb)  | ENSG00000256546 | 1322  |
| chr12 | 1.23E+08 | 1.23E+08 | 396 | Promoter (<=1kb)  | ENSG00000257097 | 293   |
| chr12 | 1.23E+08 | 1.23E+08 | 396 | Promoter (<=1kb)  | ENSG00000257097 | 771   |
| chr12 | 1.23E+08 | 1.23E+08 | 360 | Promoter (<=1kb)  | ENSG00000257097 | 831   |
| chr12 | 1.23E+08 | 1.23E+08 | 396 | Promoter (1-2kb)  | ENSG00000256028 | -1350 |
| chr12 | 1.23E+08 | 1.23E+08 | 360 | Promoter (1-2kb)  | ENSG00000256028 | -1367 |
| chr12 | 1.24E+08 | 1.24E+08 | 360 | Promoter (<=1kb)  | ENSG00000251497 | 147   |
| chr12 | 1.24E+08 | 1.24E+08 | 360 | Promoter (<=1kb)  | ENSG00000235423 | 618   |
| chr12 | 1.24E+08 | 1.24E+08 | 396 | Promoter (2-3kb)  | ENSG00000270095 | -2228 |
| chr12 | 1.24E+08 | 1.24E+08 | 396 | Promoter (2-3kb)  | ENSG00000270095 | -2429 |
| chr12 | 1.25E+08 | 1.25E+08 | 360 | Promoter (<=1kb)  | ENSG00000269923 | -633  |

|       |          |          |     |                    |                 |       |
|-------|----------|----------|-----|--------------------|-----------------|-------|
| chr12 | 1.25E+08 | 1.25E+08 | 360 | Promoter (<=1kb)   | ENSG00000269923 | -422  |
| chr12 | 1.25E+08 | 1.25E+08 | 396 | Distal Intergenic  | ENSG00000214650 | -4143 |
| chr12 | 1.25E+08 | 1.25E+08 | 360 | Promoter (2-3kb)   | ENSG00000214650 | -2792 |
| chr12 | 1.25E+08 | 1.25E+08 | 396 | Promoter (1-2kb)   | ENSG00000214650 | 1232  |
| chr12 | 1.25E+08 | 1.25E+08 | 360 | Promoter (1-2kb)   | ENSG00000214650 | 1294  |
| chr12 | 1.28E+08 | 1.28E+08 | 360 | Distal Intergenic  | ENSG00000249345 | -4990 |
| chr12 | 1.3E+08  | 1.3E+08  | 396 | Promoter (2-3kb)   | ENSG00000256137 | -2654 |
| chr12 | 1.31E+08 | 1.31E+08 | 360 | Intron (ENST000005 | ENSG00000256343 | -3154 |
| chr12 | 1.31E+08 | 1.31E+08 | 396 | Intron (ENST000005 | ENSG00000256343 | -3031 |
| chr12 | 1.31E+08 | 1.31E+08 | 360 | Promoter (1-2kb)   | ENSG00000256204 | 1086  |
| chr12 | 1.32E+08 | 1.32E+08 | 396 | Distal Intergenic  | ENSG00000256424 | -4466 |
| chr12 | 1.32E+08 | 1.32E+08 | 396 | Promoter (2-3kb)   | ENSG00000249926 | -2528 |
| chr12 | 1.32E+08 | 1.32E+08 | 360 | Promoter (2-3kb)   | ENSG00000249926 | -2541 |
| chr12 | 1.32E+08 | 1.32E+08 | 396 | Promoter (1-2kb)   | ENSG00000256955 | 1417  |
| chr12 | 1.32E+08 | 1.32E+08 | 396 | Promoter (<=1kb)   | ENSG00000255992 | -482  |
| chr12 | 1.32E+08 | 1.32E+08 | 396 | Promoter (<=1kb)   | ENSG00000255992 | -945  |
| chr12 | 1.32E+08 | 1.32E+08 | 360 | Promoter (2-3kb)   | ENSG00000255992 | -2010 |
| chr12 | 1.33E+08 | 1.33E+08 | 360 | Promoter (<=1kb)   | ENSG00000256576 | 375   |
| chr12 | 1.33E+08 | 1.33E+08 | 396 | Promoter (1-2kb)   | ENSG00000256875 | -1511 |
| chr12 | 1.33E+08 | 1.33E+08 | 396 | Promoter (<=1kb)   | ENSG00000256875 | -680  |
| chr12 | 1.33E+08 | 1.33E+08 | 360 | Promoter (1-2kb)   | ENSG00000256875 | 1354  |
| chr12 | 1.33E+08 | 1.33E+08 | 360 | Promoter (<=1kb)   | ENSG00000204583 | 0     |
| chr12 | 1.33E+08 | 1.33E+08 | 360 | Promoter (<=1kb)   | ENSG00000204583 | 0     |
| chr12 | 1.33E+08 | 1.33E+08 | 396 | Promoter (<=1kb)   | ENSG00000204583 | -238  |
| chr12 | 1.33E+08 | 1.33E+08 | 396 | Promoter (<=1kb)   | ENSG00000204583 | -452  |
| chr13 | 19475278 | 19475673 | 396 | Distal Intergenic  | ENSG00000226250 | -3906 |
| chr13 | 19596938 | 19597333 | 396 | Distal Intergenic  | ENSG00000226619 | -4644 |
| chr13 | 19597196 | 19597591 | 396 | Distal Intergenic  | ENSG00000226619 | -4386 |
| chr13 | 19602153 | 19602548 | 396 | Promoter (<=1kb)   | ENSG00000226619 | 176   |
| chr13 | 20160347 | 20160706 | 360 | Promoter (<=1kb)   | ENSG00000225316 | -552  |
| chr13 | 23424557 | 23424952 | 396 | Promoter (<=1kb)   | ENSG00000229556 | -960  |
| chr13 | 23989381 | 23989740 | 360 | Distal Intergenic  | ENSG00000229558 | -3370 |
| chr13 | 24038718 | 24039113 | 396 | Promoter (1-2kb)   | ENSG00000232977 | -1597 |
| chr13 | 24074167 | 24074562 | 396 | Promoter (1-2kb)   | ENSG00000227893 | 1232  |
| chr13 | 30464040 | 30464399 | 360 | Promoter (1-2kb)   | ENSG00000224329 | -1498 |
| chr13 | 32610059 | 32610454 | 396 | Distal Intergenic  | ENSG00000237637 | -4283 |
| chr13 | 33743305 | 33743664 | 360 | Distal Intergenic  | ENSG00000230300 | -4759 |
| chr13 | 40921494 | 40921853 | 360 | Promoter (2-3kb)   | ENSG00000230058 | 2587  |
| chr13 | 40921961 | 40922356 | 396 | Promoter (2-3kb)   | ENSG00000230058 | 2084  |
| chr13 | 40924357 | 40924716 | 360 | Promoter (<=1kb)   | ENSG00000230058 | 0     |
| chr13 | 41052766 | 41053161 | 396 | Promoter (1-2kb)   | ENSG00000215483 | 1982  |
| chr13 | 44591947 | 44592306 | 360 | Intron (ENST000004 | ENSG00000233725 | -3889 |
| chr13 | 44712401 | 44712796 | 396 | Promoter (1-2kb)   | ENSG00000226519 | -1029 |
| chr13 | 44732333 | 44732692 | 360 | Promoter (<=1kb)   | ENSG00000235285 | 0     |
| chr13 | 48409744 | 48410103 | 360 | Promoter (<=1kb)   | ENSG00000228573 | 0     |
| chr13 | 48412914 | 48413273 | 360 | Promoter (2-3kb)   | ENSG00000228573 | -2823 |
| chr13 | 48647169 | 48647528 | 360 | Distal Intergenic  | ENSG00000229111 | -3745 |
| chr13 | 48647377 | 48647736 | 360 | Distal Intergenic  | ENSG00000229111 | -3537 |
| chr13 | 48653182 | 48653541 | 360 | Promoter (1-2kb)   | ENSG00000229111 | 1909  |
| chr13 | 50623770 | 50624165 | 396 | Promoter (<=1kb)   | ENSG00000231607 | -433  |
| chr13 | 51489156 | 51489515 | 360 | Distal Intergenic  | ENSG00000233672 | -4308 |
| chr13 | 51682205 | 51682600 | 396 | Promoter (2-3kb)   | ENSG00000226792 | 2478  |
| chr13 | 51688280 | 51688675 | 396 | Intron (ENST000005 | ENSG00000226792 | -3202 |
| chr13 | 51688503 | 51688898 | 396 | Intron (ENST000005 | ENSG00000226792 | -3425 |
| chr13 | 52024756 | 52025151 | 396 | Promoter (1-2kb)   | ENSG00000236778 | -1352 |
| chr13 | 52025372 | 52025731 | 360 | Promoter (<=1kb)   | ENSG00000236778 | -772  |
| chr13 | 52025412 | 52025807 | 396 | Promoter (<=1kb)   | ENSG00000236778 | -696  |
| chr13 | 52026269 | 52026664 | 396 | Promoter (<=1kb)   | ENSG00000236778 | 0     |

|       |          |          |     |                     |                 |       |
|-------|----------|----------|-----|---------------------|-----------------|-------|
| chr13 | 52028719 | 52029078 | 360 | Promoter (<=1kb)    | ENSG00000236778 | 415   |
| chr13 | 52903847 | 52904206 | 360 | Distal Intergenic   | ENSG00000271564 | -4224 |
| chr13 | 60719647 | 60720006 | 360 | Promoter (<=1kb)    | ENSG00000223815 | 815   |
| chr13 | 64322731 | 64323090 | 360 | Promoter (<=1kb)    | ENSG00000237378 | 599   |
| chr13 | 75820289 | 75820684 | 396 | Distal Intergenic   | ENSG00000223880 | -3932 |
| chr13 | 76119930 | 76120289 | 360 | Distal Intergenic   | ENSG00000261553 | -3620 |
| chr13 | 76452039 | 76452434 | 396 | Promoter (<=1kb)    | ENSG00000223458 | -415  |
| chr13 | 78603643 | 78604002 | 360 | Promoter (1-2kb)    | ENSG00000229249 | -1069 |
| chr13 | 98326823 | 98327218 | 396 | Promoter (2-3kb)    | ENSG00000226134 | 2999  |
| chr13 | 99087837 | 99088232 | 396 | Promoter (<=1kb)    | ENSG00000231194 | 0     |
| chr13 | 99739999 | 99740358 | 360 | Promoter (<=1kb)    | ENSG00000260992 | 0     |
| chr13 | 1.11E+08 | 1.11E+08 | 360 | Promoter (<=1kb)    | ENSG00000231428 | -146  |
| chr13 | 1.11E+08 | 1.11E+08 | 360 | Promoter (<=1kb)    | ENSG00000231428 | 70    |
| chr13 | 1.11E+08 | 1.11E+08 | 396 | Promoter (<=1kb)    | ENSG00000231428 | 272   |
| chr13 | 1.11E+08 | 1.11E+08 | 360 | Promoter (<=1kb)    | ENSG00000231428 | 324   |
| chr13 | 1.11E+08 | 1.11E+08 | 360 | Promoter (<=1kb)    | ENSG00000232814 | 0     |
| chr13 | 1.13E+08 | 1.13E+08 | 360 | Promoter (1-2kb)    | ENSG00000260385 | 1768  |
| chr13 | 1.13E+08 | 1.13E+08 | 360 | Promoter (2-3kb)    | ENSG00000224243 | 2203  |
| chr13 | 1.13E+08 | 1.13E+08 | 360 | Promoter (<=1kb)    | ENSG00000223626 | 432   |
| chr13 | 1.13E+08 | 1.13E+08 | 360 | Promoter (2-3kb)    | ENSG00000232684 | 2333  |
| chr13 | 1.14E+08 | 1.14E+08 | 396 | Distal Intergenic   | ENSG00000233613 | -4252 |
| chr14 | 20943385 | 20943780 | 396 | Promoter (1-2kb)    | ENSG00000258908 | 1468  |
| chr14 | 21053177 | 21053572 | 396 | Promoter (2-3kb)    | ENSG00000258573 | -2231 |
| chr14 | 21053955 | 21054314 | 360 | Promoter (1-2kb)    | ENSG00000258573 | -1489 |
| chr14 | 21054507 | 21054902 | 396 | Promoter (<=1kb)    | ENSG00000258573 | -901  |
| chr14 | 21055390 | 21055749 | 360 | Promoter (<=1kb)    | ENSG00000258573 | -54   |
| chr14 | 21055496 | 21055891 | 396 | Promoter (<=1kb)    | ENSG00000258573 | 0     |
| chr14 | 21178305 | 21178664 | 360 | Distal Intergenic   | ENSG00000258451 | -3026 |
| chr14 | 21247735 | 21248130 | 396 | Distal Intergenic   | ENSG00000258810 | -3917 |
| chr14 | 21341677 | 21342036 | 360 | Promoter (<=1kb)    | ENSG00000259130 | 0     |
| chr14 | 21383696 | 21384055 | 360 | Intron (ENST000005) | ENSG00000136315 | -3445 |
| chr14 | 21383746 | 21384141 | 396 | Intron (ENST000005) | ENSG00000136315 | -3359 |
| chr14 | 21384511 | 21384906 | 396 | Promoter (2-3kb)    | ENSG00000136315 | -2594 |
| chr14 | 21384729 | 21385124 | 396 | Promoter (2-3kb)    | ENSG00000136315 | -2376 |
| chr14 | 21388700 | 21389059 | 360 | Promoter (1-2kb)    | ENSG00000136315 | 1180  |
| chr14 | 21408293 | 21408688 | 396 | Distal Intergenic   | ENSG00000258918 | -3879 |
| chr14 | 21408508 | 21408903 | 396 | Distal Intergenic   | ENSG00000258918 | -4094 |
| chr14 | 21487076 | 21487435 | 360 | Distal Intergenic   | ENSG00000258604 | -4896 |
| chr14 | 21558685 | 21559044 | 360 | Promoter (<=1kb)    | ENSG00000258714 | 139   |
| chr14 | 21573279 | 21573638 | 360 | Promoter (2-3kb)    | ENSG00000178107 | -2564 |
| chr14 | 21987886 | 21988281 | 396 | Promoter (<=1kb)    | ENSG00000257096 | -953  |
| chr14 | 22854977 | 22855336 | 360 | Intron (ENST000005) | ENSG00000251002 | -3405 |
| chr14 | 22881667 | 22882026 | 360 | Intron (ENST000005) | ENSG00000259042 | -4800 |
| chr14 | 22883849 | 22884208 | 360 | Promoter (2-3kb)    | ENSG00000259042 | -2618 |
| chr14 | 22884109 | 22884468 | 360 | Promoter (2-3kb)    | ENSG00000259042 | -2358 |
| chr14 | 22888810 | 22889169 | 360 | Promoter (1-2kb)    | ENSG00000259042 | 1984  |
| chr14 | 22899769 | 22900128 | 360 | Promoter (1-2kb)    | ENSG00000251002 | 1591  |
| chr14 | 22899787 | 22900182 | 396 | Promoter (1-2kb)    | ENSG00000251002 | 1537  |
| chr14 | 22902646 | 22903005 | 360 | Promoter (<=1kb)    | ENSG00000251002 | -915  |
| chr14 | 22903121 | 22903480 | 360 | Promoter (1-2kb)    | ENSG00000251002 | -1390 |
| chr14 | 22904502 | 22904897 | 396 | Promoter (2-3kb)    | ENSG00000251002 | -2771 |
| chr14 | 22949604 | 22949963 | 360 | Promoter (<=1kb)    | ENSG00000251002 | 315   |
| chr14 | 22952235 | 22952594 | 360 | Promoter (<=1kb)    | ENSG00000251002 | -287  |
| chr14 | 22952478 | 22952837 | 360 | Promoter (<=1kb)    | ENSG00000251002 | -530  |
| chr14 | 22956043 | 22956402 | 360 | Distal Intergenic   | ENSG00000251002 | -4095 |
| chr14 | 22956875 | 22957270 | 396 | Distal Intergenic   | ENSG00000251002 | -4927 |
| chr14 | 22956878 | 22957237 | 360 | Distal Intergenic   | ENSG00000251002 | -4930 |
| chr14 | 23025385 | 23025780 | 396 | Promoter (<=1kb)    | ENSG00000259054 | 176   |

|       |          |          |     |                         |                 |       |
|-------|----------|----------|-----|-------------------------|-----------------|-------|
| chr14 | 23026802 | 23027161 | 360 | Promoter (<=1kb)        | ENSG00000259054 | -846  |
| chr14 | 23030449 | 23030808 | 360 | Distal Intergenic       | ENSG00000259054 | -4493 |
| chr14 | 23065530 | 23065889 | 360 | Promoter (1-2kb)        | ENSG00000228313 | 1966  |
| chr14 | 23065733 | 23066092 | 360 | Promoter (1-2kb)        | ENSG00000228313 | 1763  |
| chr14 | 23233651 | 23234010 | 360 | Promoter (1-2kb)        | ENSG00000258458 | 1729  |
| chr14 | 23238253 | 23238612 | 360 | Promoter (2-3kb)        | ENSG00000258458 | -2482 |
| chr14 | 23238469 | 23238828 | 360 | Promoter (2-3kb)        | ENSG00000258458 | -2698 |
| chr14 | 23392052 | 23392411 | 360 | Promoter (1-2kb)        | ENSG00000237054 | 1802  |
| chr14 | 23448112 | 23448471 | 360 | Distal Intergenic       | ENSG00000258457 | -3436 |
| chr14 | 23448357 | 23448716 | 360 | Distal Intergenic       | ENSG00000258457 | -3191 |
| chr14 | 23879361 | 23879720 | 360 | Distal Intergenic       | ENSG00000258444 | -4828 |
| chr14 | 23883931 | 23884290 | 360 | Promoter (<=1kb)        | ENSG00000258444 | -258  |
| chr14 | 23980769 | 23981128 | 360 | Promoter (<=1kb)        | ENSG00000157306 | 0     |
| chr14 | 23982076 | 23982435 | 360 | Promoter (<=1kb)        | ENSG00000157306 | 0     |
| chr14 | 24025803 | 24026162 | 360 | Promoter (<=1kb)        | ENSG00000157306 | 606   |
| chr14 | 24031575 | 24031970 | 396 | Promoter (1-2kb)        | ENSG00000258727 | 1269  |
| chr14 | 24195570 | 24195965 | 396 | Promoter (2-3kb)        | ENSG00000258464 | 2941  |
| chr14 | 24195764 | 24196123 | 360 | Promoter (2-3kb)        | ENSG00000258464 | 2783  |
| chr14 | 24196006 | 24196365 | 360 | Promoter (2-3kb)        | ENSG00000258464 | 2541  |
| chr14 | 24196238 | 24196633 | 396 | Promoter (2-3kb)        | ENSG00000258464 | 2273  |
| chr14 | 24197646 | 24198005 | 360 | Promoter (<=1kb)        | ENSG00000258464 | 901   |
| chr14 | 24201211 | 24201606 | 396 | Promoter (2-3kb)        | ENSG00000258464 | -2261 |
| chr14 | 24201444 | 24201839 | 396 | Promoter (2-3kb)        | ENSG00000258464 | -2494 |
| chr14 | 24408290 | 24408649 | 360 | Exon (ENST0000055128)   | ENSG00000259334 | -4513 |
| chr14 | 24425014 | 24425409 | 396 | Promoter (1-2kb)        | ENSG00000215256 | -1608 |
| chr14 | 24426371 | 24426766 | 396 | Promoter (2-3kb)        | ENSG00000215256 | -2965 |
| chr14 | 24426396 | 24426755 | 360 | Promoter (2-3kb)        | ENSG00000215256 | -2990 |
| chr14 | 24454759 | 24455118 | 360 | Promoter (2-3kb)        | ENSG00000215256 | 2930  |
| chr14 | 24461849 | 24462208 | 360 | Distal Intergenic       | ENSG00000215256 | -3801 |
| chr14 | 25599397 | 25599756 | 360 | Distal Intergenic       | ENSG00000258098 | -3193 |
| chr14 | 27302485 | 27302880 | 396 | Intron (ENST0000055128) | ENSG00000258081 | -3054 |
| chr14 | 28789652 | 28790047 | 396 | Promoter (2-3kb)        | ENSG00000257869 | 2305  |
| chr14 | 28789763 | 28790122 | 360 | Promoter (2-3kb)        | ENSG00000257869 | 2416  |
| chr14 | 28789902 | 28790297 | 396 | Promoter (2-3kb)        | ENSG00000257869 | 2555  |
| chr14 | 29082048 | 29082407 | 360 | Promoter (<=1kb)        | ENSG00000258175 | 422   |
| chr14 | 29446034 | 29446393 | 360 | Promoter (1-2kb)        | ENSG00000257523 | 1737  |
| chr14 | 29822069 | 29822464 | 396 | Promoter (<=1kb)        | ENSG00000257522 | 544   |
| chr14 | 29855440 | 29855799 | 360 | Distal Intergenic       | ENSG00000258107 | -3753 |
| chr14 | 30405124 | 30405483 | 360 | Distal Intergenic       | ENSG00000257904 | -4468 |
| chr14 | 30409496 | 30409891 | 396 | Promoter (<=1kb)        | ENSG00000257904 | -60   |
| chr14 | 30451465 | 30451860 | 396 | Promoter (2-3kb)        | ENSG00000248975 | -2005 |
| chr14 | 30763113 | 30763472 | 360 | Promoter (2-3kb)        | ENSG00000248975 | 2751  |
| chr14 | 30942614 | 30942973 | 360 | Promoter (<=1kb)        | ENSG00000257636 | 303   |
| chr14 | 30945172 | 30945531 | 360 | Promoter (1-2kb)        | ENSG00000257636 | -1739 |
| chr14 | 30970076 | 30970435 | 360 | Promoter (2-3kb)        | ENSG00000257636 | 2042  |
| chr14 | 30976750 | 30977109 | 360 | Intron (ENST0000055128) | ENSG00000257636 | -4273 |
| chr14 | 31040846 | 31041205 | 360 | Promoter (1-2kb)        | ENSG00000257636 | 1630  |
| chr14 | 31289968 | 31290363 | 396 | Promoter (1-2kb)        | ENSG00000258558 | 1545  |
| chr14 | 31291011 | 31291406 | 396 | Promoter (<=1kb)        | ENSG00000258558 | 502   |
| chr14 | 31351493 | 31351852 | 360 | Promoter (2-3kb)        | ENSG00000258525 | 2542  |
| chr14 | 31355373 | 31355732 | 360 | Promoter (<=1kb)        | ENSG00000258525 | -979  |
| chr14 | 31355596 | 31355955 | 360 | Promoter (1-2kb)        | ENSG00000258525 | -1202 |
| chr14 | 31356090 | 31356449 | 360 | Promoter (1-2kb)        | ENSG00000258525 | -1696 |
| chr14 | 31716742 | 31717101 | 360 | Promoter (<=1kb)        | ENSG00000257831 | -733  |
| chr14 | 31717560 | 31717955 | 396 | Promoter (<=1kb)        | ENSG00000257831 | 0     |
| chr14 | 32027376 | 32027735 | 360 | Promoter (<=1kb)        | ENSG00000258196 | 0     |
| chr14 | 32890617 | 32891012 | 396 | Distal Intergenic       | ENSG00000258580 | -3437 |
| chr14 | 34505084 | 34505479 | 396 | Distal Intergenic       | ENSG00000258897 | -3824 |

|       |          |          |     |                     |                 |       |
|-------|----------|----------|-----|---------------------|-----------------|-------|
| chr14 | 35009039 | 35009398 | 360 | Promoter (2-3kb)    | ENSG00000259002 | 2252  |
| chr14 | 35010226 | 35010585 | 360 | Promoter (1-2kb)    | ENSG00000259002 | 1065  |
| chr14 | 35014115 | 35014474 | 360 | Promoter (<=1kb)    | ENSG00000258612 | 709   |
| chr14 | 35017295 | 35017654 | 360 | Promoter (2-3kb)    | ENSG00000258612 | -2112 |
| chr14 | 35017300 | 35017695 | 396 | Promoter (2-3kb)    | ENSG00000258612 | -2117 |
| chr14 | 35027000 | 35027359 | 360 | Promoter (1-2kb)    | ENSG00000259135 | 1020  |
| chr14 | 35027160 | 35027555 | 396 | Promoter (1-2kb)    | ENSG00000259135 | 1180  |
| chr14 | 35027206 | 35027565 | 360 | Promoter (1-2kb)    | ENSG00000259135 | 1226  |
| chr14 | 35341275 | 35341670 | 396 | Promoter (1-2kb)    | ENSG00000258738 | -1879 |
| chr14 | 35341499 | 35341894 | 396 | Promoter (1-2kb)    | ENSG00000258738 | -1655 |
| chr14 | 35341506 | 35341865 | 360 | Promoter (1-2kb)    | ENSG00000258738 | -1684 |
| chr14 | 35341713 | 35342108 | 396 | Promoter (1-2kb)    | ENSG00000258738 | -1441 |
| chr14 | 35341758 | 35342117 | 360 | Promoter (1-2kb)    | ENSG00000258738 | -1432 |
| chr14 | 35452471 | 35452830 | 360 | Promoter (<=1kb)    | ENSG00000258704 | -733  |
| chr14 | 35831029 | 35831388 | 360 | Promoter (1-2kb)    | ENSG00000258860 | 1446  |
| chr14 | 35831251 | 35831610 | 360 | Promoter (1-2kb)    | ENSG00000258860 | 1224  |
| chr14 | 35834129 | 35834524 | 396 | Promoter (1-2kb)    | ENSG00000258860 | -1295 |
| chr14 | 35917409 | 35917768 | 360 | Promoter (<=1kb)    | ENSG00000259017 | -578  |
| chr14 | 35917647 | 35918006 | 360 | Promoter (<=1kb)    | ENSG00000259017 | -816  |
| chr14 | 36298823 | 36299218 | 396 | Promoter (2-3kb)    | ENSG00000258938 | -2852 |
| chr14 | 36341934 | 36342293 | 360 | Promoter (<=1kb)    | ENSG00000257272 | -770  |
| chr14 | 36343148 | 36343507 | 360 | Promoter (<=1kb)    | ENSG00000257272 | 85    |
| chr14 | 36362235 | 36362630 | 396 | Distal Intergenic   | ENSG00000258342 | -4558 |
| chr14 | 36422061 | 36422420 | 360 | Promoter (2-3kb)    | ENSG00000257614 | -2811 |
| chr14 | 36986482 | 36986877 | 396 | Promoter (1-2kb)    | ENSG00000253563 | -1606 |
| chr14 | 36990679 | 36991038 | 360 | Promoter (1-2kb)    | ENSG00000257520 | -1953 |
| chr14 | 37257324 | 37257719 | 396 | Promoter (<=1kb)    | ENSG00000258690 | -130  |
| chr14 | 37273869 | 37274228 | 360 | Intron (ENST000005) | ENSG00000258601 | -3848 |
| chr14 | 37565318 | 37565677 | 360 | Promoter (2-3kb)    | ENSG00000258827 | 2091  |
| chr14 | 37566411 | 37566806 | 396 | Promoter (<=1kb)    | ENSG00000258827 | 962   |
| chr14 | 37566934 | 37567293 | 360 | Promoter (<=1kb)    | ENSG00000258827 | 475   |
| chr14 | 37568230 | 37568625 | 396 | Promoter (<=1kb)    | ENSG00000258827 | -462  |
| chr14 | 38662749 | 38663108 | 360 | Promoter (<=1kb)    | ENSG00000259048 | 378   |
| chr14 | 39305219 | 39305578 | 360 | Promoter (2-3kb)    | ENSG00000259070 | 2084  |
| chr14 | 39305429 | 39305788 | 360 | Promoter (1-2kb)    | ENSG00000259070 | 1874  |
| chr14 | 39305526 | 39305921 | 396 | Promoter (1-2kb)    | ENSG00000259070 | 1741  |
| chr14 | 39310836 | 39311231 | 396 | Intron (ENST000005) | ENSG00000259070 | -3174 |
| chr14 | 39569036 | 39569395 | 360 | Promoter (2-3kb)    | ENSG00000258651 | -2949 |
| chr14 | 39569649 | 39570008 | 360 | Promoter (2-3kb)    | ENSG00000258651 | -2336 |
| chr14 | 39734750 | 39735109 | 360 | Promoter (1-2kb)    | ENSG00000258940 | 1156  |
| chr14 | 39953004 | 39953399 | 396 | Promoter (<=1kb)    | ENSG00000258526 | -821  |
| chr14 | 42074532 | 42074927 | 396 | Promoter (<=1kb)    | ENSG00000258636 | -473  |
| chr14 | 42074734 | 42075129 | 396 | Promoter (<=1kb)    | ENSG00000258636 | -675  |
| chr14 | 42079009 | 42079368 | 360 | Distal Intergenic   | ENSG00000258636 | -4950 |
| chr14 | 42830197 | 42830556 | 360 | Promoter (1-2kb)    | ENSG00000258394 | -1630 |
| chr14 | 42884186 | 42884545 | 360 | Promoter (2-3kb)    | ENSG00000258850 | 2410  |
| chr14 | 44951906 | 44952301 | 396 | Promoter (2-3kb)    | ENSG00000258487 | -2085 |
| chr14 | 45252725 | 45253120 | 396 | Promoter (<=1kb)    | ENSG00000258998 | -693  |
| chr14 | 45253206 | 45253565 | 360 | Promoter (1-2kb)    | ENSG00000258998 | -1174 |
| chr14 | 45253243 | 45253638 | 396 | Promoter (1-2kb)    | ENSG00000258998 | -1211 |
| chr14 | 45253549 | 45253944 | 396 | Promoter (1-2kb)    | ENSG00000258998 | -1517 |
| chr14 | 45849438 | 45849833 | 396 | Promoter (2-3kb)    | ENSG00000257900 | 2967  |
| chr14 | 50087949 | 50088308 | 360 | Promoter (1-2kb)    | ENSG00000258377 | 1890  |
| chr14 | 50427528 | 50427923 | 396 | Promoter (<=1kb)    | ENSG00000258946 | -148  |
| chr14 | 50915669 | 50916028 | 360 | Promoter (<=1kb)    | ENSG00000259113 | 144   |
| chr14 | 51287677 | 51288036 | 360 | Promoter (<=1kb)    | ENSG00000258843 | -562  |
| chr14 | 52457879 | 52458238 | 360 | Distal Intergenic   | ENSG00000258854 | -3942 |
| chr14 | 53503494 | 53503853 | 360 | Promoter (<=1kb)    | ENSG00000258985 | 21    |

|       |          |          |     |                     |                 |       |
|-------|----------|----------|-----|---------------------|-----------------|-------|
| chr14 | 53687304 | 53687663 | 360 | Promoter (2-3kb)    | ENSG00000237356 | 2695  |
| chr14 | 54083141 | 54083536 | 396 | Promoter (2-3kb)    | ENSG00000225680 | -2397 |
| chr14 | 54083407 | 54083802 | 396 | Promoter (2-3kb)    | ENSG00000225680 | -2663 |
| chr14 | 55666551 | 55666910 | 360 | Promoter (<=1kb)    | ENSG00000258050 | -820  |
| chr14 | 56976355 | 56976750 | 396 | Distal Intergenic   | ENSG00000258803 | -4299 |
| chr14 | 56976618 | 56977013 | 396 | Distal Intergenic   | ENSG00000258803 | -4036 |
| chr14 | 57268816 | 57269175 | 360 | Promoter (1-2kb)    | ENSG00000270163 | -1510 |
| chr14 | 57268844 | 57269239 | 396 | Promoter (1-2kb)    | ENSG00000270163 | -1538 |
| chr14 | 57271122 | 57271481 | 360 | Distal Intergenic   | ENSG00000270163 | -3816 |
| chr14 | 57581282 | 57581641 | 360 | Promoter (1-2kb)    | ENSG00000258592 | -1904 |
| chr14 | 58758454 | 58758849 | 396 | Intron (ENST000005) | ENSG00000257621 | -4713 |
| chr14 | 59295589 | 59295948 | 360 | Promoter (<=1kb)    | ENSG00000258583 | 583   |
| chr14 | 59296106 | 59296501 | 396 | Promoter (1-2kb)    | ENSG00000258583 | 1100  |
| chr14 | 59296407 | 59296802 | 396 | Promoter (1-2kb)    | ENSG00000258583 | 1401  |
| chr14 | 59296654 | 59297049 | 396 | Promoter (1-2kb)    | ENSG00000258583 | 1648  |
| chr14 | 59359587 | 59359946 | 360 | Promoter (<=1kb)    | ENSG00000258583 | -938  |
| chr14 | 60718371 | 60718766 | 396 | Promoter (2-3kb)    | ENSG00000254718 | -2888 |
| chr14 | 60786868 | 60787227 | 360 | Promoter (2-3kb)    | ENSG00000258556 | -2727 |
| chr14 | 60787418 | 60787777 | 360 | Promoter (2-3kb)    | ENSG00000258556 | -2177 |
| chr14 | 60980240 | 60980635 | 396 | Promoter (1-2kb)    | ENSG00000258670 | -1202 |
| chr14 | 60980271 | 60980630 | 360 | Promoter (1-2kb)    | ENSG00000258670 | -1207 |
| chr14 | 60981056 | 60981451 | 396 | Promoter (<=1kb)    | ENSG00000258670 | -386  |
| chr14 | 61102925 | 61103320 | 396 | Distal Intergenic   | ENSG00000258952 | -4128 |
| chr14 | 61102947 | 61103306 | 360 | Distal Intergenic   | ENSG00000258952 | -4142 |
| chr14 | 61103198 | 61103557 | 360 | Distal Intergenic   | ENSG00000258952 | -3891 |
| chr14 | 62280042 | 62280437 | 396 | Promoter (1-2kb)    | ENSG00000258882 | 1350  |
| chr14 | 63764747 | 63765106 | 360 | Promoter (1-2kb)    | ENSG00000258943 | 1159  |
| chr14 | 63765510 | 63765905 | 396 | Promoter (<=1kb)    | ENSG00000258943 | 360   |
| chr14 | 64804924 | 64805283 | 360 | Promoter (<=1kb)    | ENSG00000214770 | 34    |
| chr14 | 64914216 | 64914575 | 360 | Promoter (<=1kb)    | ENSG00000258824 | 700   |
| chr14 | 64914360 | 64914755 | 396 | Promoter (<=1kb)    | ENSG00000258824 | 520   |
| chr14 | 64914426 | 64914785 | 360 | Promoter (<=1kb)    | ENSG00000258824 | 490   |
| chr14 | 64915707 | 64916066 | 360 | Promoter (<=1kb)    | ENSG00000258824 | -432  |
| chr14 | 65467282 | 65467641 | 360 | Promoter (2-3kb)    | ENSG00000272158 | 2844  |
| chr14 | 65472304 | 65472663 | 360 | Promoter (1-2kb)    | ENSG00000272158 | -1819 |
| chr14 | 65788520 | 65788879 | 360 | Distal Intergenic   | ENSG00000258760 | -3012 |
| chr14 | 65788694 | 65789089 | 396 | Distal Intergenic   | ENSG00000258760 | -3186 |
| chr14 | 68598910 | 68599269 | 360 | Promoter (1-2kb)    | ENSG00000258837 | -1997 |
| chr14 | 68599110 | 68599469 | 360 | Promoter (2-3kb)    | ENSG00000258837 | -2197 |
| chr14 | 68600304 | 68600663 | 360 | Distal Intergenic   | ENSG00000258837 | -3391 |
| chr14 | 69093996 | 69094355 | 360 | Promoter (<=1kb)    | ENSG00000259038 | 807   |
| chr14 | 69151199 | 69151594 | 396 | Promoter (<=1kb)    | ENSG00000258623 | 688   |
| chr14 | 69151685 | 69152080 | 396 | Promoter (<=1kb)    | ENSG00000258623 | 202   |
| chr14 | 69153865 | 69154260 | 396 | Promoter (1-2kb)    | ENSG00000258623 | -1583 |
| chr14 | 69658642 | 69659037 | 396 | Promoter (<=1kb)    | ENSG00000258957 | 0     |
| chr14 | 69658922 | 69659317 | 396 | Promoter (<=1kb)    | ENSG00000258957 | -113  |
| chr14 | 69682623 | 69683018 | 396 | Promoter (1-2kb)    | ENSG00000258957 | -1814 |
| chr14 | 69682845 | 69683240 | 396 | Promoter (2-3kb)    | ENSG00000258957 | -2036 |
| chr14 | 71648307 | 71648666 | 360 | Promoter (<=1kb)    | ENSG00000259907 | 134   |
| chr14 | 71680064 | 71680459 | 396 | Promoter (<=1kb)    | ENSG00000258517 | 714   |
| chr14 | 73059014 | 73059409 | 396 | Promoter (2-3kb)    | ENSG00000258871 | 2424  |
| chr14 | 73713608 | 73713967 | 360 | Promoter (<=1kb)    | ENSG00000258376 | -921  |
| chr14 | 73713876 | 73714271 | 396 | Promoter (1-2kb)    | ENSG00000258376 | -1189 |
| chr14 | 73714173 | 73714568 | 396 | Promoter (1-2kb)    | ENSG00000258376 | -1486 |
| chr14 | 73741564 | 73741923 | 360 | Promoter (<=1kb)    | ENSG00000258944 | -775  |
| chr14 | 74249875 | 74250234 | 360 | Distal Intergenic   | ENSG00000259065 | -3829 |
| chr14 | 74251513 | 74251908 | 396 | Promoter (2-3kb)    | ENSG00000259065 | -2155 |
| chr14 | 74257016 | 74257411 | 396 | Promoter (1-2kb)    | ENSG00000259065 | 1348  |



|       |          |          |     |                                    |                 |       |
|-------|----------|----------|-----|------------------------------------|-----------------|-------|
| chr14 | 74295649 | 74296044 | 396 | Promoter (<=1kb)                   | ENSG00000258586 | 794   |
| chr14 | 74295890 | 74296285 | 396 | Promoter (<=1kb)                   | ENSG00000258586 | 553   |
| chr14 | 74301792 | 74302187 | 396 | Distal Intergenic                  | ENSG00000258586 | -4954 |
| chr14 | 74401741 | 74402100 | 360 | Promoter (2-3kb)                   | ENSG00000258891 | 2717  |
| chr14 | 74407526 | 74407921 | 396 | Promoter (2-3kb)                   | ENSG00000258891 | -2709 |
| chr14 | 74763186 | 74763581 | 396 | Promoter (2-3kb)                   | ENSG00000258559 | -2058 |
| chr14 | 74763275 | 74763634 | 360 | Promoter (2-3kb)                   | ENSG00000258559 | -2147 |
| chr14 | 74763455 | 74763850 | 396 | Promoter (2-3kb)                   | ENSG00000258559 | -2327 |
| chr14 | 74945429 | 74945788 | 360 | Distal Intergenic                  | ENSG00000259005 | -3862 |
| chr14 | 74946211 | 74946606 | 396 | Distal Intergenic                  | ENSG00000259005 | -4644 |
| chr14 | 74946299 | 74946658 | 360 | Distal Intergenic                  | ENSG00000259005 | -4732 |
| chr14 | 74946412 | 74946807 | 396 | Distal Intergenic                  | ENSG00000259005 | -4845 |
| chr14 | 75016803 | 75017162 | 360 | Promoter (1-2kb)                   | ENSG00000258425 | -1722 |
| chr14 | 75472823 | 75473182 | 360 | Promoter (2-3kb)                   | ENSG00000258646 | 2002  |
| chr14 | 75722857 | 75723252 | 396 | Promoter (2-3kb)                   | ENSG00000258820 | -2862 |
| chr14 | 77502067 | 77502462 | 396 | Distal Intergenic                  | ENSG00000246548 | -4945 |
| chr14 | 77502314 | 77502709 | 396 | Distal Intergenic                  | ENSG00000246548 | -4698 |
| chr14 | 77502594 | 77502953 | 360 | Distal Intergenic                  | ENSG00000246548 | -4454 |
| chr14 | 88033298 | 88033657 | 360 | Promoter (<=1kb)                   | ENSG00000259028 | -868  |
| chr14 | 88035718 | 88036113 | 396 | Promoter (1-2kb)                   | ENSG00000259028 | 1193  |
| chr14 | 88035796 | 88036155 | 360 | Promoter (1-2kb)                   | ENSG00000259028 | 1271  |
| chr14 | 88035937 | 88036332 | 396 | Promoter (1-2kb)                   | ENSG00000259028 | 1412  |
| chr14 | 88041856 | 88042251 | 396 | Promoter (2-3kb)                   | ENSG00000258859 | -2490 |
| chr14 | 88043854 | 88044213 | 360 | Distal Intergenic                  | ENSG00000258859 | -4488 |
| chr14 | 88044104 | 88044499 | 396 | Distal Intergenic                  | ENSG00000258859 | -4738 |
| chr14 | 88044153 | 88044512 | 360 | Distal Intergenic                  | ENSG00000258859 | -4787 |
| chr14 | 88491087 | 88491482 | 396 | Promoter (<=1kb)                   | ENSG00000258867 | 125   |
| chr14 | 89013432 | 89013791 | 360 | Distal Intergenic                  | ENSG00000258789 | -4150 |
| chr14 | 89016695 | 89017054 | 360 | Promoter (<=1kb)                   | ENSG00000258789 | -887  |
| chr14 | 92514204 | 92514599 | 396 | Promoter (2-3kb)                   | ENSG00000261372 | 2140  |
| chr14 | 92514337 | 92514696 | 360 | Promoter (2-3kb)                   | ENSG00000261372 | 2043  |
| chr14 | 94390349 | 94390708 | 360 | Promoter (1-2kb)                   | ENSG00000258584 | 1978  |
| chr14 | 94394837 | 94395232 | 396 | Promoter (1-2kb)                   | ENSG00000258584 | -1425 |
| chr14 | 94396958 | 94397317 | 360 | Distal Intergenic                  | ENSG00000258584 | -3546 |
| chr14 | 94463172 | 94463531 | 360 | Promoter (<=1kb)                   | ENSG00000175699 | -85   |
| chr14 | 94465744 | 94466103 | 360 | Promoter (2-3kb)                   | ENSG00000175699 | 2058  |
| chr14 | 94897904 | 94898263 | 360 | Promoter (<=1kb)                   | ENSG00000256357 | 934   |
| chr14 | 94899698 | 94900057 | 360 | Promoter (2-3kb)                   | ENSG00000256357 | 2728  |
| chr14 | 95512613 | 95512972 | 360 | Promoter (1-2kb)                   | ENSG00000258866 | -1585 |
| chr14 | 96038935 | 96039330 | 396 | Promoter (<=1kb)                   | ENSG00000258390 | -569  |
| chr14 | 1.01E+08 | 1.01E+08 | 360 | Promoter (<=1kb)                   | ENSG00000258904 | 881   |
| chr14 | 1.01E+08 | 1.01E+08 | 360 | Promoter (<=1kb)                   | ENSG00000259052 | 0     |
| chr14 | 1.01E+08 | 1.01E+08 | 360 | Promoter (<=1kb)                   | ENSG00000259052 | -130  |
| chr14 | 1.01E+08 | 1.01E+08 | 396 | Distal Intergenic                  | ENSG00000259052 | -4264 |
| chr14 | 1.01E+08 | 1.01E+08 | 360 | Distal Intergenic                  | ENSG00000258666 | -3493 |
| chr14 | 1.01E+08 | 1.01E+08 | 360 | Intron (ENST000005:ENSG00000214548 | ENSG00000214548 | -4156 |
| chr14 | 1.01E+08 | 1.01E+08 | 360 | Intron (ENST000005:ENSG00000214548 | ENSG00000214548 | -3911 |
| chr14 | 1.01E+08 | 1.01E+08 | 396 | Intron (ENST000005:ENSG00000214548 | ENSG00000214548 | -3850 |
| chr14 | 1.01E+08 | 1.01E+08 | 396 | Intron (ENST000005:ENSG00000214548 | ENSG00000214548 | -3622 |
| chr14 | 1.01E+08 | 1.01E+08 | 396 | Promoter (2-3kb)                   | ENSG00000214548 | -2882 |
| chr14 | 1.01E+08 | 1.01E+08 | 360 | Promoter (2-3kb)                   | ENSG00000214548 | -2815 |
| chr14 | 1.01E+08 | 1.01E+08 | 360 | Promoter (<=1kb)                   | ENSG00000214548 | 0     |
| chr14 | 1.01E+08 | 1.01E+08 | 396 | Promoter (1-2kb)                   | ENSG00000214548 | -1456 |
| chr14 | 1.01E+08 | 1.01E+08 | 396 | Promoter (1-2kb)                   | ENSG00000214548 | -1244 |
| chr14 | 1.01E+08 | 1.01E+08 | 396 | Intron (ENST000005:ENSG00000214548 | ENSG00000214548 | -3138 |
| chr14 | 1.01E+08 | 1.01E+08 | 396 | Promoter (1-2kb)                   | ENSG00000258663 | -1128 |
| chr14 | 1.01E+08 | 1.01E+08 | 396 | Promoter (2-3kb)                   | ENSG00000258663 | -2148 |
| chr14 | 1.01E+08 | 1.01E+08 | 396 | Distal Intergenic                  | ENSG00000258663 | -3010 |

|       |          |          |     |                    |                 |       |
|-------|----------|----------|-----|--------------------|-----------------|-------|
| chr14 | 1.01E+08 | 1.01E+08 | 360 | Distal Intergenic  | ENSG00000258663 | -3149 |
| chr14 | 1.01E+08 | 1.01E+08 | 360 | Promoter (<=1kb)   | ENSG00000258399 | 46    |
| chr14 | 1.01E+08 | 1.01E+08 | 360 | Promoter (<=1kb)   | ENSG00000225746 | -375  |
| chr14 | 1.02E+08 | 1.02E+08 | 396 | Promoter (<=1kb)   | ENSG00000258460 | -925  |
| chr14 | 1.02E+08 | 1.02E+08 | 360 | Distal Intergenic  | ENSG00000259082 | -4801 |
| chr14 | 1.02E+08 | 1.02E+08 | 396 | Promoter (<=1kb)   | ENSG00000259166 | 507   |
| chr14 | 1.02E+08 | 1.02E+08 | 396 | Promoter (<=1kb)   | ENSG00000256705 | 106   |
| chr14 | 1.02E+08 | 1.02E+08 | 360 | Promoter (1-2kb)   | ENSG00000271780 | -1450 |
| chr14 | 1.03E+08 | 1.03E+08 | 360 | Promoter (<=1kb)   | ENSG00000258959 | -123  |
| chr14 | 1.03E+08 | 1.03E+08 | 396 | Promoter (2-3kb)   | ENSG00000258959 | 2282  |
| chr14 | 1.03E+08 | 1.03E+08 | 396 | Promoter (1-2kb)   | ENSG00000258959 | 1833  |
| chr14 | 1.03E+08 | 1.03E+08 | 360 | Promoter (1-2kb)   | ENSG00000258959 | 1727  |
| chr14 | 1.03E+08 | 1.03E+08 | 396 | Distal Intergenic  | ENSG00000258959 | -3093 |
| chr14 | 1.03E+08 | 1.03E+08 | 299 | Promoter (2-3kb)   | ENSG00000259508 | -2949 |
| chr14 | 1.03E+08 | 1.03E+08 | 211 | Distal Intergenic  | ENSG00000259508 | -3006 |
| chr14 | 1.04E+08 | 1.04E+08 | 396 | Promoter (1-2kb)   | ENSG00000259444 | 1410  |
| chr14 | 1.04E+08 | 1.04E+08 | 360 | Promoter (1-2kb)   | ENSG00000259444 | 1777  |
| chr14 | 1.04E+08 | 1.04E+08 | 396 | Promoter (2-3kb)   | ENSG00000269940 | -2222 |
| chr14 | 1.05E+08 | 1.05E+08 | 396 | Promoter (<=1kb)   | ENSG00000258748 | -654  |
| chr14 | 1.05E+08 | 1.05E+08 | 360 | Promoter (<=1kb)   | ENSG00000258913 | -435  |
| chr14 | 1.05E+08 | 1.05E+08 | 396 | Promoter (<=1kb)   | ENSG00000258913 | 0     |
| chr15 | 22785028 | 22785387 | 360 | Promoter (2-3kb)   | ENSG00000259596 | -2692 |
| chr15 | 22787042 | 22787437 | 396 | Distal Intergenic  | ENSG00000259596 | -4706 |
| chr15 | 25421863 | 25422222 | 360 | Intron (ENST000004 | ENSG00000224078 | -3239 |
| chr15 | 25437757 | 25438152 | 396 | Promoter (<=1kb)   | ENSG00000224078 | -308  |
| chr15 | 25437978 | 25438373 | 396 | Promoter (<=1kb)   | ENSG00000224078 | -87   |
| chr15 | 25438487 | 25438882 | 396 | Promoter (<=1kb)   | ENSG00000224078 | 19    |
| chr15 | 25438716 | 25439111 | 396 | Promoter (<=1kb)   | ENSG00000224078 | 248   |
| chr15 | 29269613 | 29270008 | 396 | Promoter (<=1kb)   | ENSG00000259277 | 0     |
| chr15 | 29269622 | 29269981 | 360 | Promoter (<=1kb)   | ENSG00000259277 | 0     |
| chr15 | 29269813 | 29270208 | 396 | Promoter (<=1kb)   | ENSG00000259277 | -146  |
| chr15 | 30650289 | 30650684 | 396 | Promoter (<=1kb)   | ENSG00000270173 | 292   |
| chr15 | 30903710 | 30904069 | 360 | Distal Intergenic  | ENSG00000270016 | -3314 |
| chr15 | 30919983 | 30920342 | 360 | Promoter (2-3kb)   | ENSG00000247728 | -2007 |
| chr15 | 31215210 | 31215605 | 396 | Distal Intergenic  | ENSG00000270015 | -3112 |
| chr15 | 31215432 | 31215791 | 360 | Promoter (2-3kb)   | ENSG00000270015 | -2926 |
| chr15 | 31216264 | 31216623 | 360 | Promoter (2-3kb)   | ENSG00000270015 | -2094 |
| chr15 | 31216491 | 31216850 | 360 | Promoter (1-2kb)   | ENSG00000270015 | -1867 |
| chr15 | 31294223 | 31294618 | 396 | Promoter (<=1kb)   | ENSG00000259720 | 7     |
| chr15 | 31296539 | 31296934 | 396 | Promoter (2-3kb)   | ENSG00000259720 | 2323  |
| chr15 | 31296770 | 31297129 | 360 | Promoter (2-3kb)   | ENSG00000259720 | 2554  |
| chr15 | 31313836 | 31314195 | 360 | Intron (ENST000005 | ENSG00000259720 | -4214 |
| chr15 | 36150019 | 36150414 | 396 | Promoter (1-2kb)   | ENSG00000248079 | 1341  |
| chr15 | 38962508 | 38962903 | 396 | Promoter (1-2kb)   | ENSG00000259747 | -1145 |
| chr15 | 39887300 | 39887695 | 396 | Promoter (<=1kb)   | ENSG00000259279 | -868  |
| chr15 | 40075759 | 40076154 | 396 | Promoter (<=1kb)   | ENSG00000261136 | 987   |
| chr15 | 40091885 | 40092280 | 396 | Promoter (1-2kb)   | ENSG00000259580 | 1254  |
| chr15 | 40092910 | 40093269 | 360 | Promoter (<=1kb)   | ENSG00000259580 | 265   |
| chr15 | 40092912 | 40093307 | 396 | Promoter (<=1kb)   | ENSG00000259580 | 227   |
| chr15 | 40093136 | 40093495 | 360 | Promoter (<=1kb)   | ENSG00000259580 | 39    |
| chr15 | 40093168 | 40093563 | 396 | Promoter (<=1kb)   | ENSG00000259580 | 0     |
| chr15 | 40106601 | 40106996 | 396 | Promoter (<=1kb)   | ENSG00000259432 | 634   |
| chr15 | 40106799 | 40107158 | 360 | Promoter (<=1kb)   | ENSG00000259432 | 472   |
| chr15 | 40106882 | 40107277 | 396 | Promoter (<=1kb)   | ENSG00000259432 | 353   |
| chr15 | 40108889 | 40109284 | 396 | Promoter (1-2kb)   | ENSG00000259432 | -1259 |
| chr15 | 40108928 | 40109287 | 360 | Promoter (1-2kb)   | ENSG00000259432 | -1298 |
| chr15 | 40352262 | 40352621 | 360 | Intron (ENST000005 | ENSG00000248508 | -3967 |
| chr15 | 40357869 | 40358228 | 360 | Promoter (1-2kb)   | ENSG00000248508 | 1281  |

|       |          |          |     |                   |                 |       |
|-------|----------|----------|-----|-------------------|-----------------|-------|
| chr15 | 40357877 | 40358272 | 396 | Promoter (1-2kb)  | ENSG00000248508 | 1289  |
| chr15 | 40358134 | 40358529 | 396 | Promoter (1-2kb)  | ENSG00000248508 | 1546  |
| chr15 | 40368166 | 40368561 | 396 | Promoter (2-3kb)  | ENSG00000259584 | 2344  |
| chr15 | 40368196 | 40368555 | 360 | Promoter (2-3kb)  | ENSG00000259584 | 2350  |
| chr15 | 40369151 | 40369510 | 360 | Promoter (1-2kb)  | ENSG00000259584 | 1395  |
| chr15 | 40369969 | 40370328 | 360 | Promoter (<=1kb)  | ENSG00000259584 | 577   |
| chr15 | 40382794 | 40383189 | 396 | Promoter (1-2kb)  | ENSG00000259409 | 1761  |
| chr15 | 40383000 | 40383395 | 396 | Promoter (1-2kb)  | ENSG00000259409 | 1967  |
| chr15 | 40383907 | 40384302 | 396 | Promoter (2-3kb)  | ENSG00000259409 | 2874  |
| chr15 | 40593029 | 40593388 | 360 | Promoter (<=1kb)  | ENSG00000259307 | 158   |
| chr15 | 40593695 | 40594090 | 396 | Promoter (<=1kb)  | ENSG00000259307 | 824   |
| chr15 | 40594383 | 40594742 | 360 | Promoter (1-2kb)  | ENSG00000259307 | 1512  |
| chr15 | 40605452 | 40605811 | 360 | Promoter (<=1kb)  | ENSG00000259198 | 636   |
| chr15 | 40763194 | 40763589 | 396 | Distal Intergenic | ENSG00000259211 | -4269 |
| chr15 | 40800864 | 40801223 | 360 | Promoter (<=1kb)  | ENSG00000259536 | 641   |
| chr15 | 40929952 | 40930311 | 360 | Distal Intergenic | ENSG00000259254 | -4820 |
| chr15 | 41135250 | 41135645 | 396 | Promoter (<=1kb)  | ENSG00000261183 | 837   |
| chr15 | 41293553 | 41293948 | 396 | Promoter (2-3kb)  | ENSG00000259617 | 2081  |
| chr15 | 42066513 | 42066908 | 396 | Promoter (1-2kb)  | ENSG00000260814 | -1583 |
| chr15 | 42069308 | 42069667 | 360 | Distal Intergenic | ENSG00000260814 | -4378 |
| chr15 | 42187542 | 42187901 | 360 | Promoter (<=1kb)  | ENSG00000174171 | 159   |
| chr15 | 42187787 | 42188146 | 360 | Promoter (<=1kb)  | ENSG00000174171 | 404   |
| chr15 | 42496460 | 42496819 | 360 | Distal Intergenic | ENSG00000261002 | -3792 |
| chr15 | 42496660 | 42497019 | 360 | Distal Intergenic | ENSG00000261002 | -3592 |
| chr15 | 42863579 | 42863974 | 396 | Promoter (1-2kb)  | ENSG00000261822 | -1387 |
| chr15 | 43029298 | 43029657 | 360 | Promoter (1-2kb)  | ENSG00000246283 | -1659 |
| chr15 | 44720200 | 44720595 | 396 | Promoter (<=1kb)  | ENSG00000259595 | -858  |
| chr15 | 44811926 | 44812321 | 396 | Promoter (2-3kb)  | ENSG00000259563 | -2245 |
| chr15 | 44811931 | 44812290 | 360 | Promoter (2-3kb)  | ENSG00000259563 | -2250 |
| chr15 | 44812126 | 44812521 | 396 | Promoter (2-3kb)  | ENSG00000259563 | -2445 |
| chr15 | 44830673 | 44831032 | 360 | Promoter (1-2kb)  | ENSG00000179523 | -1552 |
| chr15 | 44831762 | 44832157 | 396 | Promoter (2-3kb)  | ENSG00000179523 | -2641 |
| chr15 | 44833275 | 44833670 | 396 | Distal Intergenic | ENSG00000179523 | -4154 |
| chr15 | 44848994 | 44849389 | 396 | Promoter (<=1kb)  | ENSG00000259659 | -638  |
| chr15 | 44849321 | 44849680 | 360 | Promoter (<=1kb)  | ENSG00000259659 | -347  |
| chr15 | 45347948 | 45348343 | 396 | Promoter (2-3kb)  | ENSG00000259418 | 2562  |
| chr15 | 45750544 | 45750903 | 360 | Promoter (<=1kb)  | ENSG00000259354 | -305  |
| chr15 | 49232440 | 49232835 | 396 | Promoter (2-3kb)  | ENSG00000259602 | 2007  |
| chr15 | 51326599 | 51326994 | 396 | Promoter (2-3kb)  | ENSG00000259240 | -2691 |
| chr15 | 51326873 | 51327268 | 396 | Promoter (2-3kb)  | ENSG00000259240 | -2417 |
| chr15 | 52006752 | 52007147 | 396 | Promoter (<=1kb)  | ENSG00000259296 | 270   |
| chr15 | 52006913 | 52007272 | 360 | Promoter (<=1kb)  | ENSG00000259296 | 145   |
| chr15 | 52008654 | 52009049 | 396 | Promoter (1-2kb)  | ENSG00000259296 | -1237 |
| chr15 | 52008968 | 52009363 | 396 | Promoter (1-2kb)  | ENSG00000259296 | -1551 |
| chr15 | 52009029 | 52009388 | 360 | Promoter (1-2kb)  | ENSG00000259296 | -1612 |
| chr15 | 52011974 | 52012333 | 360 | Distal Intergenic | ENSG00000259296 | -4557 |
| chr15 | 52041377 | 52041736 | 360 | Promoter (2-3kb)  | ENSG00000259377 | -2946 |
| chr15 | 53407219 | 53407614 | 396 | Promoter (<=1kb)  | ENSG00000259237 | -948  |
| chr15 | 53410388 | 53410783 | 396 | Promoter (1-2kb)  | ENSG00000259237 | 1826  |
| chr15 | 54268511 | 54268870 | 360 | Promoter (<=1kb)  | ENSG00000259669 | 235   |
| chr15 | 55347860 | 55348255 | 396 | Promoter (<=1kb)  | ENSG00000260937 | -690  |
| chr15 | 55787733 | 55788092 | 360 | Promoter (2-3kb)  | ENSG00000261771 | 2447  |
| chr15 | 55789039 | 55789434 | 396 | Promoter (1-2kb)  | ENSG00000261771 | 1105  |
| chr15 | 55789346 | 55789741 | 396 | Promoter (<=1kb)  | ENSG00000261771 | 798   |
| chr15 | 56705974 | 56706333 | 360 | Distal Intergenic | ENSG00000261823 | -3590 |
| chr15 | 56918418 | 56918813 | 396 | Promoter (2-3kb)  | ENSG00000260392 | 2950  |
| chr15 | 56919949 | 56920344 | 396 | Promoter (1-2kb)  | ENSG00000260392 | 1419  |
| chr15 | 57594836 | 57595231 | 396 | Promoter (1-2kb)  | ENSG00000247982 | -1692 |

|       |          |          |     |                   |                 |       |
|-------|----------|----------|-----|-------------------|-----------------|-------|
| chr15 | 59104927 | 59105322 | 396 | Promoter (2-3kb)  | ENSG00000259402 | -2149 |
| chr15 | 59105156 | 59105515 | 360 | Promoter (1-2kb)  | ENSG00000259402 | -1956 |
| chr15 | 59182124 | 59182483 | 360 | Promoter (<=1kb)  | ENSG00000225798 | 0     |
| chr15 | 59656671 | 59657066 | 396 | Distal Intergenic | ENSG00000259735 | -4583 |
| chr15 | 59657034 | 59657393 | 360 | Distal Intergenic | ENSG00000259735 | -4946 |
| chr15 | 62350141 | 62350500 | 360 | Promoter (2-3kb)  | ENSG00000259251 | -2202 |
| chr15 | 63182833 | 63183192 | 360 | Distal Intergenic | ENSG00000259727 | -4819 |
| chr15 | 63186295 | 63186654 | 360 | Promoter (1-2kb)  | ENSG00000259727 | -1357 |
| chr15 | 63678491 | 63678886 | 396 | Distal Intergenic | ENSG00000259459 | -3449 |
| chr15 | 64216501 | 64216860 | 360 | Distal Intergenic | ENSG00000259351 | -3613 |
| chr15 | 64216710 | 64217069 | 360 | Distal Intergenic | ENSG00000259351 | -3404 |
| chr15 | 64982429 | 64982788 | 360 | Distal Intergenic | ENSG00000265967 | -4452 |
| chr15 | 67210585 | 67210944 | 360 | Promoter (1-2kb)  | ENSG00000259437 | -1205 |
| chr15 | 67833941 | 67834300 | 360 | Promoter (<=1kb)  | ENSG00000270964 | 642   |
| chr15 | 67837244 | 67837603 | 360 | Promoter (2-3kb)  | ENSG00000270964 | -2302 |
| chr15 | 67839253 | 67839648 | 396 | Distal Intergenic | ENSG00000270964 | -4311 |
| chr15 | 68120753 | 68121112 | 360 | Distal Intergenic | ENSG00000259410 | -3951 |
| chr15 | 69225184 | 69225579 | 396 | Promoter (2-3kb)  | ENSG00000137808 | 2341  |
| chr15 | 69225420 | 69225815 | 396 | Promoter (2-3kb)  | ENSG00000137808 | 2577  |
| chr15 | 69336949 | 69337308 | 360 | Promoter (1-2kb)  | ENSG00000259265 | -1044 |
| chr15 | 69568227 | 69568586 | 360 | Promoter (2-3kb)  | ENSG00000259504 | -2428 |
| chr15 | 69574842 | 69575237 | 396 | Promoter (1-2kb)  | ENSG00000259504 | -1264 |
| chr15 | 69591582 | 69591977 | 396 | Promoter (<=1kb)  | ENSG00000261634 | -485  |
| chr15 | 69591786 | 69592181 | 396 | Promoter (<=1kb)  | ENSG00000261634 | -689  |
| chr15 | 69592151 | 69592510 | 360 | Promoter (1-2kb)  | ENSG00000261634 | -1054 |
| chr15 | 69592354 | 69592713 | 360 | Promoter (1-2kb)  | ENSG00000261634 | -1257 |
| chr15 | 69594456 | 69594851 | 396 | Distal Intergenic | ENSG00000261634 | -3359 |
| chr15 | 69594641 | 69595000 | 360 | Distal Intergenic | ENSG00000261634 | -3544 |
| chr15 | 69679588 | 69679947 | 360 | Distal Intergenic | ENSG00000259645 | -3584 |
| chr15 | 69762203 | 69762562 | 360 | Promoter (1-2kb)  | ENSG00000245750 | 1828  |
| chr15 | 69762603 | 69762962 | 360 | Promoter (2-3kb)  | ENSG00000245750 | 2228  |
| chr15 | 70117013 | 70117372 | 360 | Promoter (1-2kb)  | ENSG00000259309 | -1818 |
| chr15 | 70117212 | 70117571 | 360 | Promoter (2-3kb)  | ENSG00000259309 | -2017 |
| chr15 | 70615849 | 70616208 | 360 | Promoter (1-2kb)  | ENSG00000259503 | 1934  |
| chr15 | 70616667 | 70617062 | 396 | Promoter (2-3kb)  | ENSG00000259503 | 2752  |
| chr15 | 71122480 | 71122839 | 360 | Promoter (<=1kb)  | ENSG00000267539 | 906   |
| chr15 | 72757735 | 72758094 | 360 | Promoter (<=1kb)  | ENSG00000261187 | 509   |
| chr15 | 73078404 | 73078799 | 396 | Promoter (1-2kb)  | ENSG00000260898 | 1051  |
| chr15 | 73626771 | 73627166 | 396 | Promoter (<=1kb)  | ENSG00000259650 | -435  |
| chr15 | 74162850 | 74163209 | 360 | Promoter (1-2kb)  | ENSG00000260624 | 1139  |
| chr15 | 74492975 | 74493334 | 360 | Promoter (1-2kb)  | ENSG00000259264 | -1712 |
| chr15 | 74597890 | 74598249 | 360 | Promoter (2-3kb)  | ENSG00000261384 | 2544  |
| chr15 | 74598171 | 74598566 | 396 | Promoter (2-3kb)  | ENSG00000261384 | 2825  |
| chr15 | 74654761 | 74655156 | 396 | Promoter (2-3kb)  | ENSG00000261821 | -2620 |
| chr15 | 74777242 | 74777601 | 360 | Distal Intergenic | ENSG00000261775 | -4342 |
| chr15 | 74777272 | 74777667 | 396 | Distal Intergenic | ENSG00000261775 | -4276 |
| chr15 | 74779795 | 74780190 | 396 | Promoter (1-2kb)  | ENSG00000261775 | -1753 |
| chr15 | 74779959 | 74780318 | 360 | Promoter (1-2kb)  | ENSG00000261775 | -1625 |
| chr15 | 74783413 | 74783772 | 360 | Promoter (1-2kb)  | ENSG00000261775 | 1470  |
| chr15 | 74906345 | 74906704 | 360 | Promoter (1-2kb)  | ENSG00000260919 | 1233  |
| chr15 | 74906780 | 74907175 | 396 | Promoter (<=1kb)  | ENSG00000260919 | 762   |
| chr15 | 74906803 | 74907162 | 360 | Promoter (<=1kb)  | ENSG00000260919 | 775   |
| chr15 | 74910488 | 74910883 | 396 | Promoter (2-3kb)  | ENSG00000260919 | -2551 |
| chr15 | 74910758 | 74911153 | 396 | Promoter (2-3kb)  | ENSG00000260919 | -2821 |
| chr15 | 75193257 | 75193616 | 360 | Promoter (<=1kb)  | ENSG00000260824 | 924   |
| chr15 | 75509390 | 75509785 | 396 | Distal Intergenic | ENSG00000261779 | -4882 |
| chr15 | 75531013 | 75531408 | 396 | Distal Intergenic | ENSG00000260660 | -4721 |
| chr15 | 75647350 | 75647709 | 360 | Promoter (<=1kb)  | ENSG00000260591 | 378   |

|       |          |          |     |                     |                 |       |
|-------|----------|----------|-----|---------------------|-----------------|-------|
| chr15 | 75647602 | 75647997 | 396 | Promoter (<=1kb)    | ENSG00000260591 | 90    |
| chr15 | 75648322 | 75648681 | 360 | Promoter (<=1kb)    | ENSG00000260591 | -235  |
| chr15 | 75651018 | 75651377 | 360 | Promoter (2-3kb)    | ENSG00000260591 | -2931 |
| chr15 | 75651202 | 75651597 | 396 | Distal Intergenic   | ENSG00000260591 | -3115 |
| chr15 | 75651437 | 75651832 | 396 | Distal Intergenic   | ENSG00000260591 | -3350 |
| chr15 | 75651745 | 75652104 | 360 | Distal Intergenic   | ENSG00000260591 | -3658 |
| chr15 | 77936225 | 77936584 | 360 | Promoter (2-3kb)    | ENSG00000259666 | -2100 |
| chr15 | 78079289 | 78079648 | 360 | Promoter (<=1kb)    | ENSG00000259213 | 0     |
| chr15 | 78079492 | 78079851 | 360 | Promoter (<=1kb)    | ENSG00000259213 | 0     |
| chr15 | 78082582 | 78082977 | 396 | Promoter (2-3kb)    | ENSG00000259213 | 2168  |
| chr15 | 78284481 | 78284876 | 396 | Promoter (<=1kb)    | ENSG00000259792 | -871  |
| chr15 | 78284836 | 78285195 | 360 | Promoter (<=1kb)    | ENSG00000259792 | -552  |
| chr15 | 78561306 | 78561701 | 396 | Distal Intergenic   | ENSG00000259708 | -4808 |
| chr15 | 78575405 | 78575764 | 360 | Promoter (<=1kb)    | ENSG00000272418 | -873  |
| chr15 | 78913829 | 78914224 | 396 | Distal Intergenic   | ENSG00000259555 | -4013 |
| chr15 | 79267854 | 79268213 | 360 | Distal Intergenic   | ENSG00000177699 | -3018 |
| chr15 | 80455571 | 80455966 | 396 | Promoter (2-3kb)    | ENSG00000259967 | -2299 |
| chr15 | 80738542 | 80738901 | 360 | Promoter (1-2kb)    | ENSG00000258010 | -1049 |
| chr15 | 80856687 | 80857046 | 360 | Promoter (1-2kb)    | ENSG00000259175 | -1402 |
| chr15 | 80856958 | 80857353 | 396 | Promoter (1-2kb)    | ENSG00000259175 | -1673 |
| chr15 | 80856974 | 80857333 | 360 | Promoter (1-2kb)    | ENSG00000259175 | -1689 |
| chr15 | 82709427 | 82709822 | 396 | Promoter (1-2kb)    | ENSG00000259206 | -1034 |
| chr15 | 84980214 | 84980609 | 396 | Promoter (2-3kb)    | ENSG00000259774 | 2898  |
| chr15 | 85044264 | 85044659 | 396 | Promoter (<=1kb)    | ENSG00000259551 | 655   |
| chr15 | 85160416 | 85160775 | 360 | Promoter (2-3kb)    | ENSG00000256278 | -2216 |
| chr15 | 85179201 | 85179560 | 360 | Promoter (1-2kb)    | ENSG00000254414 | -1983 |
| chr15 | 86847574 | 86847933 | 360 | Promoter (<=1kb)    | ENSG00000260125 | 279   |
| chr15 | 88246618 | 88247013 | 396 | Promoter (<=1kb)    | ENSG00000259560 | 70    |
| chr15 | 88246823 | 88247218 | 396 | Promoter (<=1kb)    | ENSG00000259560 | 0     |
| chr15 | 89148569 | 89148964 | 396 | Promoter (<=1kb)    | ENSG00000249487 | -228  |
| chr15 | 89149996 | 89150391 | 396 | Promoter (1-2kb)    | ENSG00000249487 | -1655 |
| chr15 | 89912231 | 89912626 | 396 | Promoter (<=1kb)    | ENSG00000255571 | 0     |
| chr15 | 89912504 | 89912899 | 396 | Promoter (<=1kb)    | ENSG00000255571 | 118   |
| chr15 | 89912768 | 89913163 | 396 | Promoter (<=1kb)    | ENSG00000255571 | 382   |
| chr15 | 90053213 | 90053608 | 396 | Promoter (1-2kb)    | ENSG00000261478 | 1021  |
| chr15 | 90054676 | 90055035 | 360 | Promoter (2-3kb)    | ENSG00000261478 | 2484  |
| chr15 | 90071922 | 90072281 | 360 | Intron (ENST000005) | ENSG00000259218 | -4657 |
| chr15 | 90249154 | 90249513 | 360 | Promoter (1-2kb)    | ENSG00000259561 | 1258  |
| chr15 | 91954872 | 91955267 | 396 | Promoter (2-3kb)    | ENSG00000258551 | 2934  |
| chr15 | 92714668 | 92715063 | 396 | Promoter (<=1kb)    | ENSG00000258761 | 603   |
| chr15 | 92714674 | 92715033 | 360 | Promoter (<=1kb)    | ENSG00000258761 | 633   |
| chr15 | 92878659 | 92879018 | 360 | Distal Intergenic   | ENSG00000260661 | -4392 |
| chr15 | 93019339 | 93019734 | 396 | Distal Intergenic   | ENSG00000259170 | -4563 |
| chr15 | 93321574 | 93321969 | 396 | Promoter (2-3kb)    | ENSG00000260361 | 2753  |
| chr15 | 93321864 | 93322259 | 396 | Promoter (2-3kb)    | ENSG00000260361 | 2463  |
| chr15 | 93321885 | 93322244 | 360 | Promoter (2-3kb)    | ENSG00000260361 | 2478  |
| chr15 | 93322542 | 93322937 | 396 | Promoter (1-2kb)    | ENSG00000260361 | 1785  |
| chr15 | 93322675 | 93323034 | 360 | Promoter (1-2kb)    | ENSG00000260361 | 1688  |
| chr15 | 96711498 | 96711857 | 360 | Promoter (2-3kb)    | ENSG00000259359 | -2953 |
| chr15 | 96870769 | 96871128 | 360 | Promoter (<=1kb)    | ENSG00000247809 | -179  |
| chr15 | 97971744 | 97972103 | 360 | Promoter (<=1kb)    | ENSG00000259664 | -562  |
| chr15 | 98421630 | 98422025 | 396 | Promoter (2-3kb)    | ENSG00000259870 | 2111  |
| chr15 | 98647168 | 98647527 | 360 | Promoter (<=1kb)    | ENSG00000259611 | -227  |
| chr15 | 98647643 | 98648038 | 396 | Promoter (<=1kb)    | ENSG00000259611 | -702  |
| chr15 | 98649533 | 98649928 | 396 | Promoter (2-3kb)    | ENSG00000259611 | -2592 |
| chr15 | 98649745 | 98650140 | 396 | Promoter (2-3kb)    | ENSG00000259611 | -2804 |
| chr15 | 98650403 | 98650798 | 396 | Intron (ENST000005) | ENSG00000259611 | -3462 |
| chr15 | 98651257 | 98651616 | 360 | Intron (ENST000005) | ENSG00000259611 | -4316 |

|       |          |          |     |                   |                 |       |
|-------|----------|----------|-----|-------------------|-----------------|-------|
| chr15 | 98671833 | 98672228 | 396 | Promoter (2-3kb)  | ENSG00000259320 | 2608  |
| chr15 | 98673610 | 98673969 | 360 | Promoter (<=1kb)  | ENSG00000259320 | 867   |
| chr15 | 98677616 | 98677975 | 360 | Promoter (2-3kb)  | ENSG00000259320 | -2780 |
| chr15 | 99195281 | 99195676 | 396 | Distal Intergenic | ENSG00000259424 | -4681 |
| chr15 | 99669309 | 99669668 | 360 | Promoter (2-3kb)  | ENSG00000261054 | 2343  |
| chr15 | 1.01E+08 | 1.01E+08 | 360 | Promoter (2-3kb)  | ENSG00000259430 | 2950  |
| chr15 | 1.01E+08 | 1.01E+08 | 360 | Promoter (2-3kb)  | ENSG00000270127 | 2026  |
| chr15 | 1.01E+08 | 1.01E+08 | 396 | Promoter (1-2kb)  | ENSG00000270127 | 1318  |
| chr15 | 1.01E+08 | 1.01E+08 | 360 | Promoter (1-2kb)  | ENSG00000270127 | 1227  |
| chr15 | 1.01E+08 | 1.01E+08 | 396 | Distal Intergenic | ENSG00000270127 | -3005 |
| chr15 | 1.02E+08 | 1.02E+08 | 396 | Distal Intergenic | ENSG00000259365 | -4282 |
| chr15 | 1.02E+08 | 1.02E+08 | 360 | Distal Intergenic | ENSG00000259365 | -4197 |
| chr15 | 1.02E+08 | 1.02E+08 | 360 | Promoter (1-2kb)  | ENSG00000259182 | 1488  |
| chr15 | 1.02E+08 | 1.02E+08 | 360 | Promoter (1-2kb)  | ENSG00000259182 | 1763  |
| chr16 | 75565    | 75924    | 360 | Promoter (2-3kb)  | ENSG00000231439 | 2655  |
| chr16 | 137857   | 138252   | 396 | Promoter (2-3kb)  | ENSG00000269482 | -2377 |
| chr16 | 138915   | 139310   | 396 | Promoter (1-2kb)  | ENSG00000269482 | -1319 |
| chr16 | 139194   | 139589   | 396 | Promoter (1-2kb)  | ENSG00000269482 | -1040 |
| chr16 | 234258   | 234617   | 360 | Promoter (1-2kb)  | ENSG00000268836 | 1676  |
| chr16 | 234258   | 234653   | 396 | Promoter (1-2kb)  | ENSG00000268836 | 1640  |
| chr16 | 234458   | 234853   | 396 | Promoter (1-2kb)  | ENSG00000268836 | 1440  |
| chr16 | 234895   | 235254   | 360 | Promoter (1-2kb)  | ENSG00000268836 | 1039  |
| chr16 | 235393   | 235752   | 360 | Promoter (<=1kb)  | ENSG00000268836 | 541   |
| chr16 | 700622   | 701017   | 396 | Promoter (1-2kb)  | ENSG00000228201 | -1422 |
| chr16 | 727223   | 727618   | 396 | Promoter (2-3kb)  | ENSG00000260394 | 2119  |
| chr16 | 727478   | 727837   | 360 | Promoter (1-2kb)  | ENSG00000260394 | 1900  |
| chr16 | 727724   | 728083   | 360 | Promoter (1-2kb)  | ENSG00000260394 | 1654  |
| chr16 | 740048   | 740407   | 360 | Promoter (<=1kb)  | ENSG00000261659 | 554   |
| chr16 | 740815   | 741174   | 360 | Promoter (1-2kb)  | ENSG00000261659 | 1321  |
| chr16 | 760906   | 761301   | 396 | Promoter (<=1kb)  | ENSG00000259840 | 0     |
| chr16 | 761236   | 761631   | 396 | Promoter (<=1kb)  | ENSG00000259840 | 0     |
| chr16 | 970752   | 971111   | 360 | Promoter (<=1kb)  | ENSG00000260439 | 0     |
| chr16 | 970953   | 971312   | 360 | Promoter (<=1kb)  | ENSG00000260439 | 0     |
| chr16 | 971052   | 971447   | 396 | Promoter (<=1kb)  | ENSG00000260439 | 0     |
| chr16 | 1048639  | 1049034  | 396 | Promoter (<=1kb)  | ENSG00000260496 | -732  |
| chr16 | 1160341  | 1160700  | 360 | Promoter (<=1kb)  | ENSG00000260532 | -927  |
| chr16 | 1160546  | 1160905  | 360 | Promoter (<=1kb)  | ENSG00000260532 | -722  |
| chr16 | 1309007  | 1309366  | 360 | Promoter (1-2kb)  | ENSG00000260182 | 1667  |
| chr16 | 1309092  | 1309487  | 396 | Promoter (1-2kb)  | ENSG00000260182 | 1752  |
| chr16 | 1310539  | 1310898  | 360 | Promoter (2-3kb)  | ENSG00000196364 | 2062  |
| chr16 | 1369899  | 1370258  | 360 | Promoter (2-3kb)  | ENSG00000261505 | 2570  |
| chr16 | 1413978  | 1414337  | 360 | Promoter (2-3kb)  | ENSG00000260425 | -2572 |
| chr16 | 1414886  | 1415245  | 360 | Distal Intergenic | ENSG00000260425 | -3480 |
| chr16 | 1415099  | 1415494  | 396 | Distal Intergenic | ENSG00000260425 | -3693 |
| chr16 | 1493220  | 1493615  | 396 | Promoter (1-2kb)  | ENSG00000261641 | -1729 |
| chr16 | 1493266  | 1493625  | 360 | Promoter (1-2kb)  | ENSG00000261641 | -1719 |
| chr16 | 1631067  | 1631426  | 360 | Promoter (<=1kb)  | ENSG00000260989 | 539   |
| chr16 | 1677751  | 1678146  | 396 | Promoter (1-2kb)  | ENSG00000226890 | -1590 |
| chr16 | 1678037  | 1678432  | 396 | Promoter (1-2kb)  | ENSG00000226890 | -1876 |
| chr16 | 1678367  | 1678762  | 396 | Promoter (2-3kb)  | ENSG00000226890 | -2206 |
| chr16 | 1897499  | 1897858  | 360 | Distal Intergenic | ENSG00000260541 | -3951 |
| chr16 | 1935406  | 1935765  | 360 | Distal Intergenic | ENSG00000259947 | -3350 |
| chr16 | 1935474  | 1935869  | 396 | Distal Intergenic | ENSG00000259947 | -3246 |
| chr16 | 1936032  | 1936427  | 396 | Promoter (2-3kb)  | ENSG00000259947 | -2688 |
| chr16 | 1939487  | 1939882  | 396 | Promoter (<=1kb)  | ENSG00000259947 | 372   |
| chr16 | 1939720  | 1940079  | 360 | Promoter (<=1kb)  | ENSG00000259947 | 605   |
| chr16 | 1940561  | 1940920  | 360 | Promoter (1-2kb)  | ENSG00000259947 | 1446  |
| chr16 | 1940600  | 1940995  | 396 | Promoter (1-2kb)  | ENSG00000259947 | 1485  |

|       |         |         |     |                    |                 |       |
|-------|---------|---------|-----|--------------------|-----------------|-------|
| chr16 | 1940768 | 1941127 | 360 | Promoter (1-2kb)   | ENSG00000259947 | 1653  |
| chr16 | 2009778 | 2010173 | 396 | Distal Intergenic  | ENSG00000255198 | -4787 |
| chr16 | 2010609 | 2011004 | 396 | Distal Intergenic  | ENSG00000255198 | -3956 |
| chr16 | 2012024 | 2012383 | 360 | Promoter (2-3kb)   | ENSG00000255198 | -2577 |
| chr16 | 2015294 | 2015653 | 360 | Promoter (<=1kb)   | ENSG00000255198 | 109   |
| chr16 | 2033729 | 2034124 | 396 | Promoter (2-3kb)   | ENSG00000261790 | 2730  |
| chr16 | 2034864 | 2035223 | 360 | Promoter (1-2kb)   | ENSG00000261790 | 1631  |
| chr16 | 2034901 | 2035296 | 396 | Promoter (1-2kb)   | ENSG00000261790 | 1558  |
| chr16 | 2035659 | 2036054 | 396 | Promoter (<=1kb)   | ENSG00000261790 | 800   |
| chr16 | 2035677 | 2036036 | 360 | Promoter (<=1kb)   | ENSG00000261790 | 818   |
| chr16 | 2039999 | 2040394 | 396 | Promoter (<=1kb)   | ENSG00000261790 | 0     |
| chr16 | 2047294 | 2047653 | 360 | Promoter (<=1kb)   | ENSG00000260107 | -2    |
| chr16 | 2047792 | 2048187 | 396 | Promoter (<=1kb)   | ENSG00000260107 | 137   |
| chr16 | 2157376 | 2157735 | 360 | Distal Intergenic  | ENSG00000261240 | -4601 |
| chr16 | 2157846 | 2158241 | 396 | Distal Intergenic  | ENSG00000261240 | -4095 |
| chr16 | 2157864 | 2158223 | 360 | Distal Intergenic  | ENSG00000261240 | -4113 |
| chr16 | 2162639 | 2163034 | 396 | Promoter (<=1kb)   | ENSG00000261240 | 303   |
| chr16 | 2162658 | 2163017 | 360 | Promoter (<=1kb)   | ENSG00000261240 | 322   |
| chr16 | 2163388 | 2163783 | 396 | Promoter (1-2kb)   | ENSG00000261240 | 1052  |
| chr16 | 2205309 | 2205704 | 396 | Promoter (<=1kb)   | ENSG00000260260 | 0     |
| chr16 | 2512252 | 2512611 | 360 | Promoter (2-3kb)   | ENSG00000260874 | -2272 |
| chr16 | 2513423 | 2513818 | 396 | Downstream (1-2kb) | ENSG00000260874 | -3443 |
| chr16 | 2513589 | 2513948 | 360 | Downstream (1-2kb) | ENSG00000260874 | -3609 |
| chr16 | 2520278 | 2520673 | 396 | Promoter (2-3kb)   | ENSG00000259895 | -2064 |
| chr16 | 2520562 | 2520921 | 360 | Promoter (2-3kb)   | ENSG00000259895 | -2348 |
| chr16 | 2520736 | 2521131 | 396 | Promoter (2-3kb)   | ENSG00000259895 | -2522 |
| chr16 | 2524389 | 2524784 | 396 | Promoter (1-2kb)   | ENSG00000260293 | -1775 |
| chr16 | 2524974 | 2525333 | 360 | Promoter (1-2kb)   | ENSG00000260293 | -1226 |
| chr16 | 2525179 | 2525538 | 360 | Promoter (1-2kb)   | ENSG00000260293 | -1021 |
| chr16 | 2525908 | 2526303 | 396 | Promoter (<=1kb)   | ENSG00000260293 | -256  |
| chr16 | 2602400 | 2602759 | 360 | Promoter (2-3kb)   | ENSG00000261288 | -2217 |
| chr16 | 2603142 | 2603537 | 396 | Promoter (1-2kb)   | ENSG00000261288 | -1439 |
| chr16 | 2603147 | 2603506 | 360 | Promoter (1-2kb)   | ENSG00000261288 | -1470 |
| chr16 | 2603341 | 2603736 | 396 | Promoter (1-2kb)   | ENSG00000261288 | -1240 |
| chr16 | 2603624 | 2603983 | 360 | Promoter (<=1kb)   | ENSG00000261288 | -993  |
| chr16 | 2608173 | 2608568 | 396 | Promoter (2-3kb)   | ENSG00000261613 | -2112 |
| chr16 | 2698220 | 2698579 | 360 | Distal Intergenic  | ENSG00000260176 | -3005 |
| chr16 | 2720967 | 2721362 | 396 | Promoter (<=1kb)   | ENSG00000260565 | 44    |
| chr16 | 2787591 | 2787986 | 396 | Promoter (2-3kb)   | ENSG00000205913 | 2819  |
| chr16 | 2794286 | 2794645 | 360 | Promoter (<=1kb)   | ENSG00000205913 | 153   |
| chr16 | 2903857 | 2904252 | 396 | Distal Intergenic  | ENSG00000263325 | -3647 |
| chr16 | 2903980 | 2904339 | 360 | Distal Intergenic  | ENSG00000263325 | -3560 |
| chr16 | 2904139 | 2904534 | 396 | Distal Intergenic  | ENSG00000263325 | -3365 |
| chr16 | 2904179 | 2904538 | 360 | Distal Intergenic  | ENSG00000263325 | -3361 |
| chr16 | 2904974 | 2905369 | 396 | Promoter (2-3kb)   | ENSG00000263325 | -2530 |
| chr16 | 2905016 | 2905375 | 360 | Promoter (2-3kb)   | ENSG00000263325 | -2524 |
| chr16 | 2905193 | 2905588 | 396 | Promoter (2-3kb)   | ENSG00000263325 | -2311 |
| chr16 | 2905227 | 2905586 | 360 | Promoter (2-3kb)   | ENSG00000263325 | -2313 |
| chr16 | 3005721 | 3006116 | 396 | Promoter (1-2kb)   | ENSG00000262482 | -1444 |
| chr16 | 3006931 | 3007290 | 360 | Promoter (2-3kb)   | ENSG00000262482 | -2654 |
| chr16 | 3037042 | 3037401 | 360 | Promoter (1-2kb)   | ENSG00000262152 | -1561 |
| chr16 | 3042197 | 3042556 | 360 | Promoter (2-3kb)   | ENSG00000262152 | 2002  |
| chr16 | 3059012 | 3059371 | 360 | Promoter (2-3kb)   | ENSG00000272079 | 2891  |
| chr16 | 3106352 | 3106747 | 396 | Promoter (<=1kb)   | ENSG00000261971 | -119  |
| chr16 | 3106364 | 3106723 | 360 | Promoter (<=1kb)   | ENSG00000261971 | -131  |
| chr16 | 3106604 | 3106999 | 396 | Promoter (<=1kb)   | ENSG00000261971 | 199   |
| chr16 | 3106621 | 3106980 | 360 | Promoter (<=1kb)   | ENSG00000261971 | 218   |
| chr16 | 3112007 | 3112366 | 360 | Promoter (2-3kb)   | ENSG00000261971 | -2636 |

|       |         |         |     |                   |                 |       |
|-------|---------|---------|-----|-------------------|-----------------|-------|
| chr16 | 3112319 | 3112678 | 360 | Promoter (2-3kb)  | ENSG00000261971 | -2948 |
| chr16 | 3114028 | 3114387 | 360 | Distal Intergenic | ENSG00000261971 | -4657 |
| chr16 | 3129480 | 3129875 | 396 | Promoter (<=1kb)  | ENSG00000262370 | -789  |
| chr16 | 3130098 | 3130457 | 360 | Promoter (1-2kb)  | ENSG00000262370 | -1407 |
| chr16 | 3133976 | 3134371 | 396 | Promoter (2-3kb)  | ENSG00000262370 | 2717  |
| chr16 | 3134219 | 3134614 | 396 | Promoter (2-3kb)  | ENSG00000262370 | 2474  |
| chr16 | 3134815 | 3135174 | 360 | Promoter (1-2kb)  | ENSG00000262370 | 1914  |
| chr16 | 3152109 | 3152468 | 360 | Distal Intergenic | ENSG00000263011 | -4297 |
| chr16 | 3152767 | 3153162 | 396 | Distal Intergenic | ENSG00000263011 | -3603 |
| chr16 | 3157200 | 3157595 | 396 | Promoter (<=1kb)  | ENSG00000263011 | 435   |
| chr16 | 3158943 | 3159338 | 396 | Promoter (2-3kb)  | ENSG00000263011 | 2178  |
| chr16 | 3158958 | 3159317 | 360 | Promoter (2-3kb)  | ENSG00000263011 | 2193  |
| chr16 | 3159159 | 3159518 | 360 | Promoter (2-3kb)  | ENSG00000263011 | 2394  |
| chr16 | 3163323 | 3163718 | 396 | Promoter (<=1kb)  | ENSG00000263214 | -833  |
| chr16 | 3171727 | 3172122 | 396 | Promoter (2-3kb)  | ENSG00000263072 | 2486  |
| chr16 | 3171946 | 3172341 | 396 | Promoter (2-3kb)  | ENSG00000263072 | 2267  |
| chr16 | 3175487 | 3175846 | 360 | Promoter (<=1kb)  | ENSG00000263072 | -879  |
| chr16 | 3175493 | 3175888 | 396 | Promoter (<=1kb)  | ENSG00000263072 | -885  |
| chr16 | 3177467 | 3177862 | 396 | Promoter (1-2kb)  | ENSG00000263072 | 1438  |
| chr16 | 3182371 | 3182766 | 396 | Promoter (<=1kb)  | ENSG00000263072 | -21   |
| chr16 | 3182521 | 3182880 | 360 | Promoter (<=1kb)  | ENSG00000263072 | -171  |
| chr16 | 3182947 | 3183342 | 396 | Promoter (<=1kb)  | ENSG00000263072 | -597  |
| chr16 | 3182958 | 3183317 | 360 | Promoter (<=1kb)  | ENSG00000263072 | -608  |
| chr16 | 3183169 | 3183528 | 360 | Promoter (<=1kb)  | ENSG00000263072 | -819  |
| chr16 | 3183960 | 3184319 | 360 | Promoter (<=1kb)  | ENSG00000263072 | 509   |
| chr16 | 3187813 | 3188208 | 396 | Promoter (2-3kb)  | ENSG00000263072 | -2930 |
| chr16 | 3207544 | 3207939 | 396 | Promoter (<=1kb)  | ENSG00000261889 | -60   |
| chr16 | 3233970 | 3234329 | 360 | Promoter (<=1kb)  | ENSG00000262521 | 0     |
| chr16 | 3234868 | 3235263 | 396 | Promoter (<=1kb)  | ENSG00000262521 | -850  |
| chr16 | 3235065 | 3235424 | 360 | Promoter (1-2kb)  | ENSG00000262521 | -1047 |
| chr16 | 3596343 | 3596738 | 396 | Promoter (1-2kb)  | ENSG00000262312 | 1912  |
| chr16 | 3596376 | 3596735 | 360 | Promoter (1-2kb)  | ENSG00000262312 | 1945  |
| chr16 | 3701751 | 3702146 | 396 | Promoter (<=1kb)  | ENSG00000263235 | -47   |
| chr16 | 4003161 | 4003556 | 396 | Promoter (2-3kb)  | ENSG00000262185 | -2716 |
| chr16 | 4083325 | 4083720 | 396 | Promoter (1-2kb)  | ENSG00000263159 | 1312  |
| chr16 | 4304003 | 4304362 | 360 | Promoter (<=1kb)  | ENSG00000262468 | -213  |
| chr16 | 4385566 | 4385925 | 360 | Promoter (1-2kb)  | ENSG00000262712 | 1894  |
| chr16 | 4614804 | 4615199 | 396 | Distal Intergenic | ENSG00000261789 | -3141 |
| chr16 | 4615069 | 4615464 | 396 | Distal Intergenic | ENSG00000261789 | -3406 |
| chr16 | 4616434 | 4616829 | 396 | Distal Intergenic | ENSG00000261789 | -4771 |
| chr16 | 4693086 | 4693445 | 360 | Promoter (2-3kb)  | ENSG00000261442 | -2462 |
| chr16 | 4693350 | 4693745 | 396 | Promoter (2-3kb)  | ENSG00000261442 | -2726 |
| chr16 | 4800257 | 4800652 | 396 | Promoter (1-2kb)  | ENSG00000266994 | 1914  |
| chr16 | 4846457 | 4846816 | 360 | Promoter (<=1kb)  | ENSG00000267077 | 0     |
| chr16 | 4847037 | 4847432 | 396 | Promoter (<=1kb)  | ENSG00000267077 | -504  |
| chr16 | 4847096 | 4847455 | 360 | Promoter (<=1kb)  | ENSG00000267077 | -563  |
| chr16 | 5056319 | 5056678 | 360 | Distal Intergenic | ENSG00000267072 | -4232 |
| chr16 | 5056609 | 5056968 | 360 | Distal Intergenic | ENSG00000267072 | -3942 |
| chr16 | 5143834 | 5144193 | 360 | Distal Intergenic | ENSG00000267070 | -4547 |
| chr16 | 5144130 | 5144489 | 360 | Distal Intergenic | ENSG00000267070 | -4251 |
| chr16 | 5144346 | 5144705 | 360 | Distal Intergenic | ENSG00000267070 | -4035 |
| chr16 | 5287816 | 5288175 | 360 | Promoter (1-2kb)  | ENSG00000260411 | -1628 |
| chr16 | 7664388 | 7664747 | 360 | Promoter (<=1kb)  | ENSG00000261198 | 247   |
| chr16 | 8346299 | 8346694 | 396 | Promoter (<=1kb)  | ENSG00000260003 | -597  |
| chr16 | 8360254 | 8360613 | 360 | Promoter (<=1kb)  | ENSG00000260058 | 290   |
| chr16 | 8361095 | 8361490 | 396 | Promoter (1-2kb)  | ENSG00000260058 | 1131  |
| chr16 | 8361301 | 8361696 | 396 | Promoter (1-2kb)  | ENSG00000260058 | 1337  |
| chr16 | 8580993 | 8581388 | 396 | Promoter (<=1kb)  | ENSG00000261066 | 627   |



|       |          |          |     |                   |                 |       |
|-------|----------|----------|-----|-------------------|-----------------|-------|
| chr16 | 8581193  | 8581588  | 396 | Promoter (<=1kb)  | ENSG00000261066 | 427   |
| chr16 | 8938766  | 8939125  | 360 | Promoter (2-3kb)  | ENSG00000260276 | -2837 |
| chr16 | 8942080  | 8942439  | 360 | Promoter (<=1kb)  | ENSG00000260276 | 118   |
| chr16 | 8944464  | 8944823  | 360 | Promoter (1-2kb)  | ENSG00000260350 | -1883 |
| chr16 | 8944764  | 8945123  | 360 | Promoter (2-3kb)  | ENSG00000259939 | -2046 |
| chr16 | 8957875  | 8958234  | 360 | Distal Intergenic | ENSG00000261481 | -4874 |
| chr16 | 8958076  | 8958435  | 360 | Distal Intergenic | ENSG00000261481 | -4673 |
| chr16 | 8958467  | 8958826  | 360 | Distal Intergenic | ENSG00000261481 | -4282 |
| chr16 | 8960926  | 8961321  | 396 | Promoter (1-2kb)  | ENSG00000261481 | -1787 |
| chr16 | 8961126  | 8961521  | 396 | Promoter (1-2kb)  | ENSG00000261481 | -1587 |
| chr16 | 8961249  | 8961608  | 360 | Promoter (1-2kb)  | ENSG00000261481 | -1500 |
| chr16 | 8962484  | 8962879  | 396 | Promoter (<=1kb)  | ENSG00000261481 | -229  |
| chr16 | 8962803  | 8963162  | 360 | Promoter (<=1kb)  | ENSG00000261481 | 0     |
| chr16 | 8963976  | 8964371  | 396 | Promoter (<=1kb)  | ENSG00000261481 | 868   |
| chr16 | 8964785  | 8965180  | 396 | Promoter (1-2kb)  | ENSG00000261481 | 1677  |
| chr16 | 9053196  | 9053591  | 396 | Promoter (2-3kb)  | ENSG00000260979 | -2972 |
| chr16 | 9158973  | 9159368  | 396 | Distal Intergenic | ENSG00000261392 | -3043 |
| chr16 | 9159979  | 9160374  | 396 | Promoter (2-3kb)  | ENSG00000261392 | -2037 |
| chr16 | 9160178  | 9160573  | 396 | Promoter (1-2kb)  | ENSG00000261392 | -1838 |
| chr16 | 9202188  | 9202583  | 396 | Promoter (1-2kb)  | ENSG00000263244 | 1090  |
| chr16 | 9202747  | 9203106  | 360 | Promoter (1-2kb)  | ENSG00000263244 | 1649  |
| chr16 | 9541584  | 9541943  | 360 | Promoter (2-3kb)  | ENSG00000261397 | -2742 |
| chr16 | 9555814  | 9556173  | 360 | Distal Intergenic | ENSG00000260071 | -4339 |
| chr16 | 10122650 | 10123045 | 396 | Distal Intergenic | ENSG00000261810 | -4496 |
| chr16 | 10123336 | 10123695 | 360 | Distal Intergenic | ENSG00000261810 | -3846 |
| chr16 | 10447223 | 10447618 | 396 | Promoter (<=1kb)  | ENSG00000260756 | -614  |
| chr16 | 10619368 | 10619727 | 360 | Promoter (2-3kb)  | ENSG00000260468 | 2332  |
| chr16 | 10619576 | 10619935 | 360 | Promoter (2-3kb)  | ENSG00000260468 | 2124  |
| chr16 | 10624352 | 10624711 | 360 | Promoter (1-2kb)  | ENSG00000256013 | 1055  |
| chr16 | 10668703 | 10669098 | 396 | Promoter (2-3kb)  | ENSG00000260310 | 2942  |
| chr16 | 10980104 | 10980499 | 396 | Promoter (1-2kb)  | ENSG00000262151 | 1996  |
| chr16 | 10983863 | 10984258 | 396 | Promoter (1-2kb)  | ENSG00000262151 | -1254 |
| chr16 | 11034728 | 11035123 | 396 | Promoter (<=1kb)  | ENSG00000262222 | 152   |
| chr16 | 11167150 | 11167509 | 360 | Promoter (2-3kb)  | ENSG00000262020 | -2191 |
| chr16 | 11292895 | 11293254 | 360 | Promoter (2-3kb)  | ENSG00000263033 | 2861  |
| chr16 | 11440375 | 11440734 | 360 | Promoter (1-2kb)  | ENSG00000263080 | -1307 |
| chr16 | 11440996 | 11441391 | 396 | Promoter (1-2kb)  | ENSG00000262703 | 1787  |
| chr16 | 11442545 | 11442904 | 360 | Promoter (<=1kb)  | ENSG00000262703 | 274   |
| chr16 | 11556072 | 11556431 | 360 | Promoter (2-3kb)  | ENSG00000262999 | -2685 |
| chr16 | 11558238 | 11558633 | 396 | Promoter (<=1kb)  | ENSG00000262999 | -483  |
| chr16 | 11558513 | 11558908 | 396 | Promoter (<=1kb)  | ENSG00000262999 | -208  |
| chr16 | 11836435 | 11836794 | 360 | Promoter (<=1kb)  | ENSG00000262420 | 669   |
| chr16 | 11837013 | 11837408 | 396 | Promoter (1-2kb)  | ENSG00000262420 | 1247  |
| chr16 | 11924315 | 11924674 | 360 | Promoter (1-2kb)  | ENSG00000262117 | -1613 |
| chr16 | 11973404 | 11973799 | 396 | Promoter (2-3kb)  | ENSG00000261560 | 2627  |
| chr16 | 11974274 | 11974669 | 396 | Promoter (1-2kb)  | ENSG00000261560 | 1757  |
| chr16 | 11975316 | 11975711 | 396 | Promoter (<=1kb)  | ENSG00000261560 | 715   |
| chr16 | 11975547 | 11975942 | 396 | Promoter (<=1kb)  | ENSG00000261560 | 484   |
| chr16 | 11975575 | 11975934 | 360 | Promoter (<=1kb)  | ENSG00000261560 | 492   |
| chr16 | 11975872 | 11976231 | 360 | Promoter (<=1kb)  | ENSG00000261560 | 195   |
| chr16 | 11976304 | 11976663 | 360 | Promoter (<=1kb)  | ENSG00000261560 | 0     |
| chr16 | 11976447 | 11976842 | 396 | Promoter (<=1kb)  | ENSG00000261560 | -21   |
| chr16 | 11977250 | 11977609 | 360 | Promoter (<=1kb)  | ENSG00000261560 | -824  |
| chr16 | 12469027 | 12469386 | 360 | Promoter (2-3kb)  | ENSG00000260723 | 2347  |
| chr16 | 12635294 | 12635653 | 360 | Distal Intergenic | ENSG00000260601 | -3686 |
| chr16 | 12837295 | 12837654 | 360 | Promoter (2-3kb)  | ENSG00000260378 | -2076 |
| chr16 | 12851811 | 12852170 | 360 | Promoter (<=1kb)  | ENSG00000261158 | -969  |
| chr16 | 13340934 | 13341329 | 396 | Promoter (<=1kb)  | ENSG00000262801 | 761   |

|       |          |          |     |                     |                 |       |
|-------|----------|----------|-----|---------------------|-----------------|-------|
| chr16 | 13443246 | 13443605 | 360 | Promoter (<=1kb)    | ENSG00000262801 | -807  |
| chr16 | 14032297 | 14032656 | 360 | Promoter (2-3kb)    | ENSG00000262732 | -2805 |
| chr16 | 14044685 | 14045044 | 360 | Promoter (1-2kb)    | ENSG00000263234 | -1968 |
| chr16 | 14045649 | 14046008 | 360 | Promoter (1-2kb)    | ENSG00000263234 | -1004 |
| chr16 | 14106905 | 14107300 | 396 | Promoter (2-3kb)    | ENSG00000262097 | 2558  |
| chr16 | 14107126 | 14107485 | 360 | Promoter (2-3kb)    | ENSG00000262097 | 2373  |
| chr16 | 14112185 | 14112580 | 396 | Promoter (2-3kb)    | ENSG00000262097 | -2312 |
| chr16 | 14112450 | 14112809 | 360 | Promoter (2-3kb)    | ENSG00000261856 | 2125  |
| chr16 | 14113843 | 14114238 | 396 | Promoter (<=1kb)    | ENSG00000261856 | 696   |
| chr16 | 14114147 | 14114542 | 396 | Promoter (<=1kb)    | ENSG00000261856 | 392   |
| chr16 | 14117263 | 14117622 | 360 | Promoter (2-3kb)    | ENSG00000261856 | -2329 |
| chr16 | 14119811 | 14120206 | 396 | Distal Intergenic   | ENSG00000261856 | -4877 |
| chr16 | 14292101 | 14292496 | 396 | Promoter (1-2kb)    | ENSG00000262529 | 1638  |
| chr16 | 14391164 | 14391559 | 396 | Distal Intergenic   | ENSG00000262454 | -4586 |
| chr16 | 14392927 | 14393286 | 360 | Promoter (2-3kb)    | ENSG00000262454 | -2859 |
| chr16 | 14394681 | 14395040 | 360 | Promoter (1-2kb)    | ENSG00000262454 | -1105 |
| chr16 | 14395795 | 14396190 | 396 | Promoter (<=1kb)    | ENSG00000262454 | 0     |
| chr16 | 14399358 | 14399717 | 360 | Promoter (2-3kb)    | ENSG00000262454 | 2996  |
| chr16 | 14414725 | 14415084 | 360 | Promoter (2-3kb)    | ENSG00000262454 | -2067 |
| chr16 | 14417815 | 14418210 | 396 | Promoter (<=1kb)    | ENSG00000262454 | 664   |
| chr16 | 14461521 | 14461880 | 360 | Promoter (2-3kb)    | ENSG00000260009 | 2243  |
| chr16 | 14464697 | 14465092 | 396 | Promoter (<=1kb)    | ENSG00000260009 | -574  |
| chr16 | 14510577 | 14510936 | 360 | Promoter (1-2kb)    | ENSG00000263257 | 1793  |
| chr16 | 14510988 | 14511383 | 396 | Promoter (1-2kb)    | ENSG00000263257 | 1346  |
| chr16 | 14511084 | 14511443 | 360 | Promoter (1-2kb)    | ENSG00000263257 | 1286  |
| chr16 | 14511188 | 14511583 | 396 | Promoter (1-2kb)    | ENSG00000263257 | 1146  |
| chr16 | 14512398 | 14512757 | 360 | Promoter (<=1kb)    | ENSG00000263257 | 0     |
| chr16 | 15007403 | 15007798 | 396 | Promoter (2-3kb)    | ENSG00000258354 | -2201 |
| chr16 | 15008647 | 15009042 | 396 | Distal Intergenic   | ENSG00000258354 | -3445 |
| chr16 | 15008751 | 15009110 | 360 | Distal Intergenic   | ENSG00000258354 | -3549 |
| chr16 | 15009753 | 15010112 | 360 | Distal Intergenic   | ENSG00000258354 | -4551 |
| chr16 | 15697982 | 15698341 | 360 | Distal Intergenic   | ENSG00000257769 | -3990 |
| chr16 | 15699178 | 15699573 | 396 | Promoter (2-3kb)    | ENSG00000257769 | -2758 |
| chr16 | 15777362 | 15777721 | 360 | Promoter (<=1kb)    | ENSG00000262380 | 215   |
| chr16 | 15777893 | 15778252 | 360 | Promoter (<=1kb)    | ENSG00000262380 | 746   |
| chr16 | 15821992 | 15822387 | 396 | Promoter (1-2kb)    | ENSG00000263335 | 1461  |
| chr16 | 15829719 | 15830114 | 396 | Distal Intergenic   | ENSG00000263065 | -4894 |
| chr16 | 15974914 | 15975309 | 396 | Distal Intergenic   | ENSG00000262171 | -3577 |
| chr16 | 15975128 | 15975523 | 396 | Distal Intergenic   | ENSG00000262171 | -3363 |
| chr16 | 17636388 | 17636783 | 396 | Promoter (1-2kb)    | ENSG00000260945 | -1546 |
| chr16 | 18579313 | 18579708 | 396 | Promoter (2-3kb)    | ENSG00000260550 | 2682  |
| chr16 | 18579549 | 18579944 | 396 | Promoter (2-3kb)    | ENSG00000260550 | 2446  |
| chr16 | 18936902 | 18937297 | 396 | Promoter (<=1kb)    | ENSG00000260352 | -888  |
| chr16 | 18939242 | 18939601 | 360 | Promoter (1-2kb)    | ENSG00000260352 | 1057  |
| chr16 | 19081930 | 19082325 | 396 | Promoter (2-3kb)    | ENSG00000261465 | -2917 |
| chr16 | 19082034 | 19082393 | 360 | Distal Intergenic   | ENSG00000261465 | -3021 |
| chr16 | 19082238 | 19082597 | 360 | Distal Intergenic   | ENSG00000261465 | -3225 |
| chr16 | 19093036 | 19093431 | 396 | Distal Intergenic   | ENSG00000260430 | -4747 |
| chr16 | 19093644 | 19094039 | 396 | Distal Intergenic   | ENSG00000260430 | -4139 |
| chr16 | 19095506 | 19095901 | 396 | Promoter (2-3kb)    | ENSG00000260430 | -2277 |
| chr16 | 19095513 | 19095872 | 360 | Promoter (2-3kb)    | ENSG00000260430 | -2306 |
| chr16 | 19133294 | 19133689 | 396 | Promoter (<=1kb)    | ENSG00000261759 | -343  |
| chr16 | 19133981 | 19134340 | 360 | Promoter (1-2kb)    | ENSG00000261759 | -1030 |
| chr16 | 19311548 | 19311943 | 396 | Distal Intergenic   | ENSG00000188477 | -4260 |
| chr16 | 19323891 | 19324286 | 396 | Promoter (2-3kb)    | ENSG00000259871 | -2200 |
| chr16 | 19376797 | 19377156 | 360 | Promoter (2-3kb)    | ENSG00000259925 | 2044  |
| chr16 | 19381895 | 19382254 | 360 | Promoter (2-3kb)    | ENSG00000259925 | -2695 |
| chr16 | 19382420 | 19382815 | 396 | Intron (ENST000005) | ENSG00000259925 | -3220 |

|       |          |          |     |                     |                 |       |
|-------|----------|----------|-----|---------------------|-----------------|-------|
| chr16 | 19382622 | 19383017 | 396 | Intron (ENST000005) | ENSG00000259925 | -3422 |
| chr16 | 19502599 | 19502994 | 396 | Distal Intergenic   | ENSG00000260592 | -3378 |
| chr16 | 19502804 | 19503163 | 360 | Distal Intergenic   | ENSG00000260592 | -3583 |
| chr16 | 19515881 | 19516276 | 396 | Promoter (2-3kb)    | ENSG00000260934 | 2870  |
| chr16 | 19717755 | 19718114 | 360 | Promoter (<=1kb)    | ENSG00000261312 | 82    |
| chr16 | 19718108 | 19718467 | 360 | Promoter (<=1kb)    | ENSG00000261312 | 435   |
| chr16 | 19718156 | 19718551 | 396 | Promoter (<=1kb)    | ENSG00000261312 | 483   |
| chr16 | 19718414 | 19718809 | 396 | Promoter (<=1kb)    | ENSG00000261312 | 741   |
| chr16 | 19718701 | 19719096 | 396 | Promoter (1-2kb)    | ENSG00000261312 | 1028  |
| chr16 | 20216368 | 20216727 | 360 | Distal Intergenic   | ENSG00000263253 | -3520 |
| chr16 | 20397216 | 20397575 | 360 | Promoter (<=1kb)    | ENSG00000263237 | 0     |
| chr16 | 20397508 | 20397867 | 360 | Promoter (<=1kb)    | ENSG00000263237 | 229   |
| chr16 | 20398081 | 20398440 | 360 | Promoter (<=1kb)    | ENSG00000263237 | 802   |
| chr16 | 20459089 | 20459448 | 360 | Promoter (<=1kb)    | ENSG00000262995 | -767  |
| chr16 | 20587756 | 20588151 | 396 | Distal Intergenic   | ENSG00000260201 | -4059 |
| chr16 | 20591194 | 20591553 | 360 | Promoter (<=1kb)    | ENSG00000260201 | -657  |
| chr16 | 20591806 | 20592201 | 396 | Promoter (<=1kb)    | ENSG00000260201 | -9    |
| chr16 | 20591813 | 20592172 | 360 | Promoter (<=1kb)    | ENSG00000260201 | -38   |
| chr16 | 20593847 | 20594206 | 360 | Promoter (<=1kb)    | ENSG00000260201 | 751   |
| chr16 | 20776564 | 20776959 | 396 | Promoter (<=1kb)    | ENSG00000260510 | 983   |
| chr16 | 21127500 | 21127859 | 360 | Distal Intergenic   | ENSG00000263331 | -4220 |
| chr16 | 21133624 | 21134019 | 396 | Promoter (1-2kb)    | ENSG00000263331 | 1545  |
| chr16 | 21134065 | 21134424 | 360 | Promoter (1-2kb)    | ENSG00000263331 | 1986  |
| chr16 | 21202052 | 21202411 | 360 | Distal Intergenic   | ENSG00000262983 | -3757 |
| chr16 | 21635057 | 21635452 | 396 | Promoter (2-3kb)    | ENSG00000261596 | -2611 |
| chr16 | 21638741 | 21639136 | 396 | Promoter (<=1kb)    | ENSG00000261596 | 678   |
| chr16 | 22096507 | 22096902 | 396 | Promoter (1-2kb)    | ENSG00000260277 | 1525  |
| chr16 | 22102786 | 22103145 | 360 | Promoter (<=1kb)    | ENSG00000260277 | 407   |
| chr16 | 22103017 | 22103376 | 360 | Promoter (<=1kb)    | ENSG00000260277 | 176   |
| chr16 | 22296964 | 22297323 | 360 | Promoter (2-3kb)    | ENSG00000261113 | 2730  |
| chr16 | 22297043 | 22297438 | 396 | Promoter (2-3kb)    | ENSG00000261113 | 2615  |
| chr16 | 22297242 | 22297637 | 396 | Promoter (2-3kb)    | ENSG00000261113 | 2416  |
| chr16 | 22298406 | 22298765 | 360 | Promoter (1-2kb)    | ENSG00000261113 | 1288  |
| chr16 | 22298414 | 22298809 | 396 | Promoter (1-2kb)    | ENSG00000261113 | 1244  |
| chr16 | 22299354 | 22299749 | 396 | Promoter (<=1kb)    | ENSG00000261113 | 304   |
| chr16 | 22299366 | 22299725 | 360 | Promoter (<=1kb)    | ENSG00000261113 | 328   |
| chr16 | 22303963 | 22304358 | 396 | Distal Intergenic   | ENSG00000261113 | -3904 |
| chr16 | 22371152 | 22371547 | 396 | Distal Intergenic   | ENSG00000260635 | -4895 |
| chr16 | 22371952 | 22372347 | 396 | Distal Intergenic   | ENSG00000260635 | -4095 |
| chr16 | 22372479 | 22372838 | 360 | Distal Intergenic   | ENSG00000260635 | -3604 |
| chr16 | 22373593 | 22373988 | 396 | Promoter (2-3kb)    | ENSG00000260635 | -2454 |
| chr16 | 22373794 | 22374153 | 360 | Promoter (2-3kb)    | ENSG00000260635 | -2289 |
| chr16 | 22373824 | 22374219 | 396 | Promoter (2-3kb)    | ENSG00000260635 | -2223 |
| chr16 | 22374673 | 22375068 | 396 | Promoter (1-2kb)    | ENSG00000260635 | -1374 |
| chr16 | 22374694 | 22375053 | 360 | Promoter (1-2kb)    | ENSG00000260635 | -1389 |
| chr16 | 22376952 | 22377347 | 396 | Promoter (<=1kb)    | ENSG00000260635 | 510   |
| chr16 | 22377946 | 22378305 | 360 | Promoter (1-2kb)    | ENSG00000260635 | 1504  |
| chr16 | 22383902 | 22384261 | 360 | Promoter (1-2kb)    | ENSG00000260790 | -1919 |
| chr16 | 22620753 | 22621148 | 396 | Promoter (2-3kb)    | ENSG00000260973 | 2369  |
| chr16 | 22626446 | 22626805 | 360 | Promoter (1-2kb)    | ENSG00000260905 | -1642 |
| chr16 | 22626690 | 22627049 | 360 | Promoter (1-2kb)    | ENSG00000260905 | -1886 |
| chr16 | 23029303 | 23029662 | 360 | Promoter (1-2kb)    | ENSG00000261090 | -1996 |
| chr16 | 23073285 | 23073680 | 396 | Promoter (1-2kb)    | ENSG00000260566 | 1814  |
| chr16 | 23227437 | 23227796 | 360 | Distal Intergenic   | ENSG00000260741 | -3012 |
| chr16 | 23455770 | 23456129 | 360 | Promoter (2-3kb)    | ENSG00000259782 | 2474  |
| chr16 | 23461080 | 23461439 | 360 | Promoter (2-3kb)    | ENSG00000259782 | -2477 |
| chr16 | 23578107 | 23578466 | 360 | Promoter (1-2kb)    | ENSG00000260751 | -1528 |
| chr16 | 23611928 | 23612287 | 360 | Distal Intergenic   | ENSG00000261723 | -4875 |

|       |          |          |     |                   |                 |       |
|-------|----------|----------|-----|-------------------|-----------------|-------|
| chr16 | 23615739 | 23616134 | 396 | Promoter (1-2kb)  | ENSG00000261723 | -1028 |
| chr16 | 23676784 | 23677179 | 396 | Distal Intergenic | ENSG00000260482 | -4153 |
| chr16 | 23676823 | 23677182 | 360 | Distal Intergenic | ENSG00000260482 | -4150 |
| chr16 | 23678577 | 23678972 | 396 | Promoter (2-3kb)  | ENSG00000260482 | -2360 |
| chr16 | 23678633 | 23678992 | 360 | Promoter (2-3kb)  | ENSG00000260482 | -2340 |
| chr16 | 23678776 | 23679171 | 396 | Promoter (2-3kb)  | ENSG00000260482 | -2161 |
| chr16 | 23679048 | 23679443 | 396 | Promoter (1-2kb)  | ENSG00000260482 | -1889 |
| chr16 | 23683744 | 23684139 | 396 | Promoter (<=1kb)  | ENSG00000259806 | 291   |
| chr16 | 23683835 | 23684194 | 360 | Promoter (<=1kb)  | ENSG00000259806 | 382   |
| chr16 | 23720569 | 23720928 | 360 | Promoter (2-3kb)  | ENSG00000261583 | -2383 |
| chr16 | 24504204 | 24504599 | 396 | Promoter (1-2kb)  | ENSG00000260072 | 1899  |
| chr16 | 24504510 | 24504905 | 396 | Promoter (1-2kb)  | ENSG00000260072 | 1593  |
| chr16 | 24504798 | 24505193 | 396 | Promoter (1-2kb)  | ENSG00000260072 | 1305  |
| chr16 | 24620038 | 24620397 | 360 | Promoter (1-2kb)  | ENSG00000259888 | -1190 |
| chr16 | 24684262 | 24684621 | 360 | Promoter (1-2kb)  | ENSG00000224310 | -1879 |
| chr16 | 24684475 | 24684834 | 360 | Promoter (2-3kb)  | ENSG00000224310 | -2092 |
| chr16 | 24686730 | 24687089 | 360 | Distal Intergenic | ENSG00000224310 | -4347 |
| chr16 | 24834354 | 24834749 | 396 | Distal Intergenic | ENSG00000261669 | -3294 |
| chr16 | 25111573 | 25111968 | 396 | Promoter (2-3kb)  | ENSG00000260448 | 2911  |
| chr16 | 25111814 | 25112209 | 396 | Promoter (2-3kb)  | ENSG00000260448 | 2670  |
| chr16 | 25112273 | 25112668 | 396 | Promoter (2-3kb)  | ENSG00000260448 | 2211  |
| chr16 | 25156771 | 25157130 | 360 | Promoter (<=1kb)  | ENSG00000260034 | 439   |
| chr16 | 25156832 | 25157227 | 396 | Promoter (<=1kb)  | ENSG00000260034 | 342   |
| chr16 | 25161066 | 25161461 | 396 | Promoter (<=1kb)  | ENSG00000260034 | -713  |
| chr16 | 25248277 | 25248636 | 360 | Promoter (1-2kb)  | ENSG00000259955 | -1003 |
| chr16 | 26324675 | 26325070 | 396 | Distal Intergenic | ENSG00000231876 | -4358 |
| chr16 | 26334493 | 26334852 | 360 | Promoter (<=1kb)  | ENSG00000231876 | 660   |
| chr16 | 27076622 | 27076981 | 360 | Promoter (1-2kb)  | ENSG00000234186 | -1047 |
| chr16 | 27189721 | 27190116 | 396 | Promoter (1-2kb)  | ENSG00000261045 | -1813 |
| chr16 | 28304123 | 28304518 | 396 | Promoter (<=1kb)  | ENSG00000246465 | -738  |
| chr16 | 28304179 | 28304538 | 360 | Promoter (<=1kb)  | ENSG00000246465 | -794  |
| chr16 | 28846098 | 28846457 | 360 | Promoter (2-3kb)  | ENSG00000260570 | 2064  |
| chr16 | 28846175 | 28846570 | 396 | Promoter (1-2kb)  | ENSG00000260570 | 1951  |
| chr16 | 28846393 | 28846752 | 360 | Promoter (1-2kb)  | ENSG00000260570 | 1769  |
| chr16 | 28846788 | 28847183 | 396 | Promoter (1-2kb)  | ENSG00000260570 | 1338  |
| chr16 | 28889750 | 28890109 | 360 | Promoter (1-2kb)  | ENSG00000260442 | 1107  |
| chr16 | 28892117 | 28892512 | 396 | Promoter (<=1kb)  | ENSG00000260442 | -876  |
| chr16 | 28892347 | 28892742 | 396 | Promoter (1-2kb)  | ENSG00000260442 | -1106 |
| chr16 | 28894428 | 28894787 | 360 | Distal Intergenic | ENSG00000260442 | -3187 |
| chr16 | 28990220 | 28990579 | 360 | Promoter (<=1kb)  | ENSG00000260367 | -75   |
| chr16 | 29229269 | 29229628 | 360 | Promoter (1-2kb)  | ENSG00000259807 | 1724  |
| chr16 | 29259621 | 29259980 | 360 | Promoter (2-3kb)  | ENSG00000198106 | -2849 |
| chr16 | 29259760 | 29260155 | 396 | Promoter (2-3kb)  | ENSG00000198106 | -2674 |
| chr16 | 29260791 | 29261150 | 360 | Promoter (1-2kb)  | ENSG00000198106 | -1679 |
| chr16 | 29261549 | 29261908 | 360 | Promoter (<=1kb)  | ENSG00000198106 | -921  |
| chr16 | 29261775 | 29262170 | 396 | Promoter (<=1kb)  | ENSG00000198106 | -659  |
| chr16 | 29261787 | 29262146 | 360 | Promoter (<=1kb)  | ENSG00000198106 | -683  |
| chr16 | 29261992 | 29262351 | 360 | Promoter (<=1kb)  | ENSG00000198106 | -478  |
| chr16 | 29263293 | 29263652 | 360 | Promoter (<=1kb)  | ENSG00000198106 | 464   |
| chr16 | 29265557 | 29265952 | 396 | Promoter (2-3kb)  | ENSG00000198106 | 2728  |
| chr16 | 29758045 | 29758440 | 396 | Promoter (1-2kb)  | ENSG00000260719 | 1477  |
| chr16 | 29758280 | 29758675 | 396 | Promoter (1-2kb)  | ENSG00000260719 | 1712  |
| chr16 | 29789785 | 29790180 | 396 | Distal Intergenic | ENSG00000262756 | -3066 |
| chr16 | 29789887 | 29790246 | 360 | Promoter (2-3kb)  | ENSG00000262756 | -3000 |
| chr16 | 29790424 | 29790819 | 396 | Promoter (2-3kb)  | ENSG00000262756 | -2427 |
| chr16 | 29790735 | 29791130 | 396 | Promoter (2-3kb)  | ENSG00000262756 | -2116 |
| chr16 | 29790992 | 29791387 | 396 | Promoter (1-2kb)  | ENSG00000262756 | -1859 |
| chr16 | 29816100 | 29816495 | 396 | Promoter (2-3kb)  | ENSG00000259952 | 2558  |

|       |          |          |     |                     |                 |       |
|-------|----------|----------|-----|---------------------|-----------------|-------|
| chr16 | 29817410 | 29817805 | 396 | Promoter (1-2kb)    | ENSG00000259952 | 1248  |
| chr16 | 29817630 | 29818025 | 396 | Promoter (1-2kb)    | ENSG00000259952 | 1028  |
| chr16 | 29817941 | 29818336 | 396 | Promoter (<=1kb)    | ENSG00000259952 | 717   |
| chr16 | 29820232 | 29820627 | 396 | Promoter (<=1kb)    | ENSG00000238045 | 401   |
| chr16 | 29820302 | 29820661 | 360 | Promoter (<=1kb)    | ENSG00000238045 | 367   |
| chr16 | 29821302 | 29821697 | 396 | Promoter (<=1kb)    | ENSG00000238045 | -274  |
| chr16 | 29821515 | 29821910 | 396 | Promoter (<=1kb)    | ENSG00000238045 | -487  |
| chr16 | 29825287 | 29825646 | 360 | Promoter (1-2kb)    | ENSG00000238045 | -1981 |
| chr16 | 29826198 | 29826593 | 396 | Promoter (2-3kb)    | ENSG00000238045 | -2892 |
| chr16 | 29826673 | 29827032 | 360 | Intron (ENST000005) | ENSG00000238045 | -3367 |
| chr16 | 29826883 | 29827242 | 360 | Intron (ENST000005) | ENSG00000238045 | -3577 |
| chr16 | 29826885 | 29827280 | 396 | Intron (ENST000005) | ENSG00000238045 | -3579 |
| chr16 | 29934631 | 29935026 | 396 | Promoter (1-2kb)    | ENSG00000260114 | -1405 |
| chr16 | 29937628 | 29937987 | 360 | Promoter (<=1kb)    | ENSG00000247735 | -170  |
| chr16 | 29939714 | 29940073 | 360 | Promoter (1-2kb)    | ENSG00000247735 | 1557  |
| chr16 | 30361956 | 30362315 | 360 | Distal Intergenic   | ENSG00000260219 | -4447 |
| chr16 | 30367517 | 30367876 | 360 | Promoter (<=1kb)    | ENSG00000260219 | 755   |
| chr16 | 30509959 | 30510318 | 360 | Promoter (<=1kb)    | ENSG00000261332 | 557   |
| chr16 | 30540863 | 30541222 | 360 | Distal Intergenic   | ENSG00000235560 | -4851 |
| chr16 | 30541813 | 30542172 | 360 | Distal Intergenic   | ENSG00000235560 | -3901 |
| chr16 | 30542146 | 30542541 | 396 | Distal Intergenic   | ENSG00000235560 | -3532 |
| chr16 | 30542455 | 30542850 | 396 | Distal Intergenic   | ENSG00000235560 | -3223 |
| chr16 | 30542716 | 30543111 | 396 | Promoter (2-3kb)    | ENSG00000235560 | -2962 |
| chr16 | 30542791 | 30543150 | 360 | Promoter (2-3kb)    | ENSG00000235560 | -2923 |
| chr16 | 30592617 | 30593012 | 396 | Intron (ENST000004) | ENSG00000260167 | -4216 |
| chr16 | 30598240 | 30598599 | 360 | Promoter (1-2kb)    | ENSG00000260167 | 1012  |
| chr16 | 30598439 | 30598798 | 360 | Promoter (1-2kb)    | ENSG00000260167 | 1211  |
| chr16 | 30710490 | 30710849 | 360 | Promoter (<=1kb)    | ENSG00000261840 | -111  |
| chr16 | 30710689 | 30711048 | 360 | Promoter (<=1kb)    | ENSG00000261840 | -310  |
| chr16 | 30747950 | 30748309 | 360 | Distal Intergenic   | ENSG00000260899 | -3679 |
| chr16 | 30748272 | 30748631 | 360 | Distal Intergenic   | ENSG00000260899 | -3357 |
| chr16 | 30748555 | 30748914 | 360 | Distal Intergenic   | ENSG00000260899 | -3074 |
| chr16 | 30786435 | 30786794 | 360 | Promoter (2-3kb)    | ENSG00000262026 | -2976 |
| chr16 | 30787073 | 30787432 | 360 | Promoter (2-3kb)    | ENSG00000262026 | -2338 |
| chr16 | 30787128 | 30787523 | 396 | Promoter (2-3kb)    | ENSG00000262026 | -2247 |
| chr16 | 30787340 | 30787735 | 396 | Promoter (2-3kb)    | ENSG00000262026 | -2035 |
| chr16 | 30787849 | 30788244 | 396 | Promoter (1-2kb)    | ENSG00000262026 | -1526 |
| chr16 | 30787931 | 30788290 | 360 | Promoter (1-2kb)    | ENSG00000262026 | -1480 |
| chr16 | 30903937 | 30904332 | 396 | Promoter (2-3kb)    | ENSG00000262721 | 2205  |
| chr16 | 30909014 | 30909373 | 360 | Promoter (2-3kb)    | ENSG00000262721 | -2477 |
| chr16 | 30909250 | 30909609 | 360 | Promoter (2-3kb)    | ENSG00000262721 | -2713 |
| chr16 | 30954360 | 30954719 | 360 | Distal Intergenic   | ENSG00000261487 | -4988 |
| chr16 | 30954568 | 30954927 | 360 | Distal Intergenic   | ENSG00000261487 | -4780 |
| chr16 | 30954882 | 30955241 | 360 | Distal Intergenic   | ENSG00000261487 | -4466 |
| chr16 | 30957094 | 30957453 | 360 | Promoter (2-3kb)    | ENSG00000261487 | -2254 |
| chr16 | 30957101 | 30957496 | 396 | Promoter (2-3kb)    | ENSG00000261487 | -2211 |
| chr16 | 30957385 | 30957780 | 396 | Promoter (1-2kb)    | ENSG00000261487 | -1927 |
| chr16 | 30957630 | 30958025 | 396 | Promoter (1-2kb)    | ENSG00000261487 | -1682 |
| chr16 | 30957683 | 30958042 | 360 | Promoter (1-2kb)    | ENSG00000261487 | -1665 |
| chr16 | 30957888 | 30958283 | 396 | Promoter (1-2kb)    | ENSG00000261487 | -1424 |
| chr16 | 31072410 | 31072769 | 360 | Distal Intergenic   | ENSG00000261124 | -4047 |
| chr16 | 31073004 | 31073399 | 396 | Distal Intergenic   | ENSG00000261124 | -3417 |
| chr16 | 31073051 | 31073410 | 360 | Distal Intergenic   | ENSG00000261124 | -3406 |
| chr16 | 31073477 | 31073836 | 360 | Promoter (2-3kb)    | ENSG00000261124 | -2980 |
| chr16 | 31074272 | 31074631 | 360 | Promoter (2-3kb)    | ENSG00000261124 | -2185 |
| chr16 | 31074484 | 31074879 | 396 | Promoter (1-2kb)    | ENSG00000261124 | -1937 |
| chr16 | 31126794 | 31127153 | 360 | Promoter (2-3kb)    | ENSG00000262766 | -2246 |
| chr16 | 31140297 | 31140692 | 396 | Promoter (2-3kb)    | ENSG00000261385 | -2062 |

|       |          |          |     |                   |                 |       |
|-------|----------|----------|-----|-------------------|-----------------|-------|
| chr16 | 31140601 | 31140996 | 396 | Promoter (1-2kb)  | ENSG00000261385 | -1758 |
| chr16 | 31142351 | 31142746 | 396 | Promoter (<=1kb)  | ENSG00000261385 | -8    |
| chr16 | 31142411 | 31142770 | 360 | Promoter (<=1kb)  | ENSG00000261385 | 0     |
| chr16 | 31194924 | 31195283 | 360 | Promoter (<=1kb)  | ENSG00000260304 | -318  |
| chr16 | 31197595 | 31197990 | 396 | Promoter (2-3kb)  | ENSG00000260304 | -2989 |
| chr16 | 31202098 | 31202457 | 360 | Distal Intergenic | ENSG00000260060 | -4995 |
| chr16 | 31202566 | 31202925 | 360 | Distal Intergenic | ENSG00000260060 | -4527 |
| chr16 | 31202581 | 31202976 | 396 | Distal Intergenic | ENSG00000260060 | -4476 |
| chr16 | 31203582 | 31203977 | 396 | Distal Intergenic | ENSG00000260060 | -3475 |
| chr16 | 31236666 | 31237061 | 396 | Promoter (<=1kb)  | ENSG00000261925 | -220  |
| chr16 | 31239257 | 31239616 | 360 | Promoter (1-2kb)  | ENSG00000261925 | 1976  |
| chr16 | 31410999 | 31411358 | 360 | Promoter (2-3kb)  | ENSG00000260757 | -2528 |
| chr16 | 31467606 | 31467965 | 360 | Promoter (2-3kb)  | ENSG00000261474 | -2792 |
| chr16 | 31471909 | 31472268 | 360 | Promoter (<=1kb)  | ENSG00000260267 | -852  |
| chr16 | 31502971 | 31503330 | 360 | Distal Intergenic | ENSG00000260740 | -3158 |
| chr16 | 31503263 | 31503622 | 360 | Distal Intergenic | ENSG00000260740 | -3450 |
| chr16 | 31709856 | 31710215 | 360 | Promoter (1-2kb)  | ENSG00000260568 | 1571  |
| chr16 | 31710767 | 31711162 | 396 | Promoter (<=1kb)  | ENSG00000260568 | 624   |
| chr16 | 31711027 | 31711422 | 396 | Promoter (<=1kb)  | ENSG00000260568 | 364   |
| chr16 | 31713194 | 31713589 | 396 | Promoter (1-2kb)  | ENSG00000260568 | -1408 |
| chr16 | 31713222 | 31713581 | 360 | Promoter (1-2kb)  | ENSG00000260568 | -1436 |
| chr16 | 31713403 | 31713798 | 396 | Promoter (1-2kb)  | ENSG00000260568 | -1617 |
| chr16 | 31713682 | 31714041 | 360 | Promoter (1-2kb)  | ENSG00000260568 | -1896 |
| chr16 | 31714281 | 31714640 | 360 | Promoter (2-3kb)  | ENSG00000260568 | -2495 |
| chr16 | 31715036 | 31715431 | 396 | Distal Intergenic | ENSG00000260568 | -3250 |
| chr16 | 31715754 | 31716113 | 360 | Distal Intergenic | ENSG00000260568 | -3968 |
| chr16 | 31715965 | 31716324 | 360 | Distal Intergenic | ENSG00000260568 | -4179 |
| chr16 | 34744377 | 34744736 | 360 | Distal Intergenic | ENSG00000260857 | -3544 |
| chr16 | 46692456 | 46692851 | 396 | Promoter (2-3kb)  | ENSG00000261131 | 2652  |
| chr16 | 46742889 | 46743248 | 360 | Distal Intergenic | ENSG00000261788 | -4952 |
| chr16 | 47035943 | 47036302 | 360 | Promoter (2-3kb)  | ENSG00000259821 | -2122 |
| chr16 | 47037702 | 47038061 | 360 | Promoter (<=1kb)  | ENSG00000259821 | -363  |
| chr16 | 47225640 | 47226035 | 396 | Distal Intergenic | ENSG00000260744 | -4187 |
| chr16 | 47334182 | 47334541 | 360 | Promoter (<=1kb)  | ENSG00000261369 | 824   |
| chr16 | 47335269 | 47335664 | 396 | Promoter (1-2kb)  | ENSG00000261369 | 1911  |
| chr16 | 47559065 | 47559460 | 396 | Distal Intergenic | ENSG00000262038 | -3641 |
| chr16 | 47564737 | 47565096 | 360 | Promoter (1-2kb)  | ENSG00000262038 | 1636  |
| chr16 | 48201920 | 48202315 | 396 | Promoter (<=1kb)  | ENSG00000261538 | -771  |
| chr16 | 48202149 | 48202508 | 360 | Promoter (<=1kb)  | ENSG00000261538 | -1000 |
| chr16 | 48204487 | 48204846 | 360 | Distal Intergenic | ENSG00000261538 | -3338 |
| chr16 | 48204532 | 48204927 | 396 | Distal Intergenic | ENSG00000261538 | -3383 |
| chr16 | 48485997 | 48486392 | 396 | Distal Intergenic | ENSG00000261802 | -3688 |
| chr16 | 48589102 | 48589497 | 396 | Distal Intergenic | ENSG00000261267 | -4075 |
| chr16 | 48591044 | 48591403 | 360 | Promoter (2-3kb)  | ENSG00000261267 | -2169 |
| chr16 | 48596221 | 48596616 | 396 | Promoter (2-3kb)  | ENSG00000261267 | 2649  |
| chr16 | 48596286 | 48596645 | 360 | Promoter (2-3kb)  | ENSG00000261267 | 2714  |
| chr16 | 48650136 | 48650531 | 396 | Distal Intergenic | ENSG00000259912 | -3699 |
| chr16 | 48650321 | 48650680 | 360 | Distal Intergenic | ENSG00000259912 | -3550 |
| chr16 | 49327822 | 49328217 | 396 | Promoter (<=1kb)  | ENSG00000259957 | -580  |
| chr16 | 49485025 | 49485384 | 360 | Promoter (2-3kb)  | ENSG00000262950 | 2605  |
| chr16 | 49485226 | 49485585 | 360 | Promoter (2-3kb)  | ENSG00000262950 | 2404  |
| chr16 | 49490182 | 49490541 | 360 | Promoter (2-3kb)  | ENSG00000263110 | 2042  |
| chr16 | 50153997 | 50154356 | 360 | Promoter (1-2kb)  | ENSG00000260381 | 1498  |
| chr16 | 50154794 | 50155153 | 360 | Promoter (<=1kb)  | ENSG00000260381 | 701   |
| chr16 | 50154849 | 50155244 | 396 | Promoter (<=1kb)  | ENSG00000260381 | 610   |
| chr16 | 50155624 | 50155983 | 360 | Promoter (<=1kb)  | ENSG00000260381 | 0     |
| chr16 | 50157985 | 50158344 | 360 | Promoter (2-3kb)  | ENSG00000260381 | -2131 |
| chr16 | 50158631 | 50159026 | 396 | Promoter (2-3kb)  | ENSG00000260381 | -2777 |

|       |          |          |     |                    |                 |       |
|-------|----------|----------|-----|--------------------|-----------------|-------|
| chr16 | 50158857 | 50159252 | 396 | Distal Intergenic  | ENSG00000260381 | -3003 |
| chr16 | 50400099 | 50400494 | 396 | Promoter (1-2kb)   | ENSG00000261393 | -1997 |
| chr16 | 50436779 | 50437138 | 360 | Distal Intergenic  | ENSG00000260573 | -4474 |
| chr16 | 50587283 | 50587642 | 360 | Promoter (<=1kb)   | ENSG00000260029 | 209   |
| chr16 | 50591251 | 50591610 | 360 | Distal Intergenic  | ENSG00000260029 | -3400 |
| chr16 | 50699837 | 50700232 | 396 | Promoter (<=1kb)   | ENSG00000260249 | 0     |
| chr16 | 50699956 | 50700315 | 360 | Promoter (<=1kb)   | ENSG00000260249 | 0     |
| chr16 | 50700043 | 50700438 | 396 | Promoter (<=1kb)   | ENSG00000260249 | 0     |
| chr16 | 50700155 | 50700514 | 360 | Promoter (<=1kb)   | ENSG00000260249 | 33    |
| chr16 | 50741648 | 50742007 | 360 | Distal Intergenic  | ENSG00000270120 | -4748 |
| chr16 | 50741706 | 50742101 | 396 | Distal Intergenic  | ENSG00000270120 | -4654 |
| chr16 | 50741920 | 50742315 | 396 | Distal Intergenic  | ENSG00000270120 | -4440 |
| chr16 | 50772468 | 50772863 | 396 | Promoter (1-2kb)   | ENSG00000261644 | 1764  |
| chr16 | 51058531 | 51058926 | 396 | Promoter (<=1kb)   | ENSG00000261637 | 0     |
| chr16 | 52266494 | 52266853 | 360 | Distal Intergenic  | ENSG00000260975 | -4626 |
| chr16 | 52592750 | 52593109 | 360 | Intron (ENST000005 | ENSG00000249231 | -4659 |
| chr16 | 52592986 | 52593345 | 360 | Intron (ENST000005 | ENSG00000249231 | -4895 |
| chr16 | 52646350 | 52646745 | 396 | Promoter (<=1kb)   | ENSG00000260963 | 0     |
| chr16 | 52658168 | 52658527 | 360 | Promoter (1-2kb)   | ENSG00000261261 | 1414  |
| chr16 | 52683002 | 52683361 | 360 | Promoter (2-3kb)   | ENSG00000249231 | 2656  |
| chr16 | 53421747 | 53422142 | 396 | Promoter (<=1kb)   | ENSG00000262714 | 891   |
| chr16 | 54069041 | 54069436 | 396 | Intron (ENST000005 | ENSG00000260936 | -3869 |
| chr16 | 54069803 | 54070162 | 360 | Intron (ENST000005 | ENSG00000260936 | -3143 |
| chr16 | 54072567 | 54072962 | 396 | Promoter (<=1kb)   | ENSG00000260936 | -343  |
| chr16 | 54075580 | 54075975 | 396 | Promoter (2-3kb)   | ENSG00000260936 | 2275  |
| chr16 | 54886210 | 54886569 | 360 | Distal Intergenic  | ENSG00000261171 | -4065 |
| chr16 | 54964474 | 54964833 | 360 | Promoter (1-2kb)   | ENSG00000245694 | -1373 |
| chr16 | 54966896 | 54967255 | 360 | Promoter (1-2kb)   | ENSG00000259711 | -1570 |
| chr16 | 54966969 | 54967364 | 396 | Promoter (1-2kb)   | ENSG00000259711 | -1461 |
| chr16 | 54970096 | 54970455 | 360 | Promoter (1-2kb)   | ENSG00000259711 | 1271  |
| chr16 | 55366810 | 55367169 | 360 | Promoter (<=1kb)   | ENSG00000259283 | 331   |
| chr16 | 55495805 | 55496164 | 360 | Promoter (<=1kb)   | ENSG00000260135 | 45    |
| chr16 | 55568594 | 55568989 | 396 | Distal Intergenic  | ENSG00000261997 | -3123 |
| chr16 | 55569506 | 55569865 | 360 | Promoter (2-3kb)   | ENSG00000261997 | -2247 |
| chr16 | 56233204 | 56233563 | 360 | Distal Intergenic  | ENSG00000261439 | -4774 |
| chr16 | 56330761 | 56331120 | 360 | Distal Intergenic  | ENSG00000260198 | -3408 |
| chr16 | 56333131 | 56333490 | 360 | Promoter (1-2kb)   | ENSG00000260198 | -1038 |
| chr16 | 56643600 | 56643959 | 360 | Promoter (1-2kb)   | ENSG00000260823 | 1328  |
| chr16 | 56682302 | 56682661 | 360 | Promoter (<=1kb)   | ENSG00000259923 | -132  |
| chr16 | 57091666 | 57092025 | 360 | Promoter (<=1kb)   | ENSG00000260145 | 384   |
| chr16 | 57279493 | 57279888 | 396 | Promoter (1-2kb)   | ENSG00000260038 | -1374 |
| chr16 | 57280401 | 57280760 | 360 | Promoter (<=1kb)   | ENSG00000260038 | -502  |
| chr16 | 57280869 | 57281264 | 396 | Promoter (<=1kb)   | ENSG00000260038 | 0     |
| chr16 | 57281017 | 57281376 | 360 | Promoter (<=1kb)   | ENSG00000260038 | 0     |
| chr16 | 57281238 | 57281597 | 360 | Promoter (<=1kb)   | ENSG00000260038 | 0     |
| chr16 | 57281932 | 57282291 | 360 | Promoter (<=1kb)   | ENSG00000260038 | 670   |
| chr16 | 57283054 | 57283449 | 396 | Promoter (1-2kb)   | ENSG00000260038 | 1792  |
| chr16 | 57283295 | 57283690 | 396 | Promoter (2-3kb)   | ENSG00000260038 | 2033  |
| chr16 | 57284151 | 57284510 | 360 | Promoter (2-3kb)   | ENSG00000260946 | 2154  |
| chr16 | 57284222 | 57284617 | 396 | Promoter (2-3kb)   | ENSG00000260946 | 2047  |
| chr16 | 57284373 | 57284732 | 360 | Promoter (1-2kb)   | ENSG00000260946 | 1932  |
| chr16 | 57285079 | 57285438 | 360 | Promoter (1-2kb)   | ENSG00000260946 | 1226  |
| chr16 | 57666675 | 57667034 | 360 | Promoter (1-2kb)   | ENSG00000261633 | -1116 |
| chr16 | 57666705 | 57667100 | 396 | Promoter (1-2kb)   | ENSG00000261633 | -1146 |
| chr16 | 57734964 | 57735323 | 360 | Promoter (<=1kb)   | ENSG00000260467 | 319   |
| chr16 | 57735055 | 57735450 | 396 | Promoter (<=1kb)   | ENSG00000260467 | 192   |
| chr16 | 57736798 | 57737193 | 396 | Promoter (1-2kb)   | ENSG00000260467 | -1156 |
| chr16 | 57736851 | 57737210 | 360 | Promoter (1-2kb)   | ENSG00000260467 | -1209 |

|       |          |          |     |                   |                 |       |
|-------|----------|----------|-----|-------------------|-----------------|-------|
| chr16 | 58148030 | 58148389 | 360 | Promoter (2-3kb)  | ENSG00000260545 | -2400 |
| chr16 | 58420766 | 58421125 | 360 | Distal Intergenic | ENSG00000261078 | -3064 |
| chr16 | 58456264 | 58456623 | 360 | Promoter (<=1kb)  | ENSG00000260186 | 999   |
| chr16 | 58457381 | 58457740 | 360 | Promoter (2-3kb)  | ENSG00000260186 | 2116  |
| chr16 | 61950158 | 61950553 | 396 | Promoter (1-2kb)  | ENSG00000260115 | -1672 |
| chr16 | 63763184 | 63763543 | 360 | Promoter (<=1kb)  | ENSG00000261014 | -638  |
| chr16 | 64769870 | 64770265 | 396 | Promoter (<=1kb)  | ENSG00000259859 | 42    |
| chr16 | 65602576 | 65602935 | 360 | Promoter (2-3kb)  | ENSG00000261742 | 2757  |
| chr16 | 66444003 | 66444362 | 360 | Promoter (1-2kb)  | ENSG00000246898 | 1576  |
| chr16 | 66506912 | 66507307 | 396 | Promoter (2-3kb)  | ENSG00000261656 | 2463  |
| chr16 | 66512049 | 66512444 | 396 | Promoter (1-2kb)  | ENSG00000261656 | -1744 |
| chr16 | 66512314 | 66512673 | 360 | Promoter (2-3kb)  | ENSG00000261656 | -2009 |
| chr16 | 66515027 | 66515386 | 360 | Promoter (<=1kb)  | ENSG00000261656 | 0     |
| chr16 | 66515031 | 66515426 | 396 | Promoter (<=1kb)  | ENSG00000261656 | 0     |
| chr16 | 66515751 | 66516146 | 396 | Promoter (<=1kb)  | ENSG00000261656 | -618  |
| chr16 | 66515768 | 66516127 | 360 | Promoter (<=1kb)  | ENSG00000261656 | -635  |
| chr16 | 66516463 | 66516822 | 360 | Promoter (1-2kb)  | ENSG00000261656 | -1330 |
| chr16 | 66516954 | 66517313 | 360 | Promoter (1-2kb)  | ENSG00000261656 | -1821 |
| chr16 | 66516989 | 66517384 | 396 | Promoter (1-2kb)  | ENSG00000261656 | -1856 |
| chr16 | 66518023 | 66518418 | 396 | Promoter (2-3kb)  | ENSG00000261656 | -2890 |
| chr16 | 66518281 | 66518676 | 396 | Distal Intergenic | ENSG00000261656 | -3148 |
| chr16 | 66519431 | 66519790 | 360 | Distal Intergenic | ENSG00000261656 | -4298 |
| chr16 | 66543725 | 66544084 | 360 | Promoter (<=1kb)  | ENSG00000260755 | 385   |
| chr16 | 66543941 | 66544300 | 360 | Promoter (<=1kb)  | ENSG00000260755 | 601   |
| chr16 | 66615064 | 66615423 | 360 | Promoter (<=1kb)  | ENSG00000260650 | -445  |
| chr16 | 66617079 | 66617474 | 396 | Promoter (2-3kb)  | ENSG00000260650 | -2460 |
| chr16 | 66618159 | 66618518 | 360 | Distal Intergenic | ENSG00000260650 | -3540 |
| chr16 | 66750629 | 66751024 | 396 | Distal Intergenic | ENSG00000260465 | -3776 |
| chr16 | 66751129 | 66751488 | 360 | Distal Intergenic | ENSG00000260465 | -3312 |
| chr16 | 66751134 | 66751529 | 396 | Distal Intergenic | ENSG00000260465 | -3271 |
| chr16 | 66751909 | 66752304 | 396 | Promoter (2-3kb)  | ENSG00000260465 | -2496 |
| chr16 | 66752701 | 66753060 | 360 | Promoter (1-2kb)  | ENSG00000260465 | -1740 |
| chr16 | 66752950 | 66753309 | 360 | Promoter (1-2kb)  | ENSG00000260465 | -1491 |
| chr16 | 66753714 | 66754073 | 360 | Promoter (<=1kb)  | ENSG00000260465 | -727  |
| chr16 | 66772478 | 66772837 | 360 | Promoter (<=1kb)  | ENSG00000260558 | 312   |
| chr16 | 66925035 | 66925430 | 396 | Promoter (1-2kb)  | ENSG00000261088 | 1941  |
| chr16 | 66972195 | 66972590 | 396 | Distal Intergenic | ENSG00000265408 | -4025 |
| chr16 | 66975378 | 66975737 | 360 | Promoter (<=1kb)  | ENSG00000265408 | -878  |
| chr16 | 66975432 | 66975827 | 396 | Promoter (<=1kb)  | ENSG00000265408 | -788  |
| chr16 | 66975598 | 66975957 | 360 | Promoter (<=1kb)  | ENSG00000265408 | -658  |
| chr16 | 67514295 | 67514654 | 360 | Promoter (<=1kb)  | ENSG00000270049 | -563  |
| chr16 | 67514352 | 67514747 | 396 | Promoter (<=1kb)  | ENSG00000270049 | -470  |
| chr16 | 67521142 | 67521537 | 396 | Promoter (2-3kb)  | ENSG00000270049 | 2997  |
| chr16 | 67772008 | 67772367 | 360 | Promoter (1-2kb)  | ENSG00000270165 | 1458  |
| chr16 | 67773247 | 67773606 | 360 | Promoter (<=1kb)  | ENSG00000270165 | 219   |
| chr16 | 67917511 | 67917870 | 360 | Promoter (1-2kb)  | ENSG00000263126 | 1147  |
| chr16 | 68052596 | 68052955 | 360 | Promoter (2-3kb)  | ENSG00000263201 | -2782 |
| chr16 | 68107645 | 68108040 | 396 | Distal Intergenic | ENSG00000261864 | -3203 |
| chr16 | 68108968 | 68109327 | 360 | Promoter (1-2kb)  | ENSG00000261864 | -1916 |
| chr16 | 68110584 | 68110979 | 396 | Promoter (<=1kb)  | ENSG00000261864 | -264  |
| chr16 | 68110787 | 68111182 | 396 | Promoter (<=1kb)  | ENSG00000261864 | -61   |
| chr16 | 68112995 | 68113354 | 360 | Promoter (1-2kb)  | ENSG00000261864 | 1752  |
| chr16 | 68229379 | 68229738 | 360 | Distal Intergenic | ENSG00000262514 | -3960 |
| chr16 | 68229639 | 68229998 | 360 | Distal Intergenic | ENSG00000262514 | -3700 |
| chr16 | 68230944 | 68231339 | 396 | Promoter (2-3kb)  | ENSG00000262514 | -2359 |
| chr16 | 68231793 | 68232152 | 360 | Promoter (1-2kb)  | ENSG00000262514 | -1546 |
| chr16 | 68234911 | 68235306 | 396 | Promoter (1-2kb)  | ENSG00000262514 | 1213  |
| chr16 | 68235416 | 68235775 | 360 | Promoter (1-2kb)  | ENSG00000262514 | 1718  |



|       |          |          |     |                      |                 |       |
|-------|----------|----------|-----|----------------------|-----------------|-------|
| chr16 | 68235617 | 68235976 | 360 | Promoter (1-2kb)     | ENSG00000262514 | 1919  |
| chr16 | 68236125 | 68236520 | 396 | Promoter (2-3kb)     | ENSG00000262514 | 2427  |
| chr16 | 68236153 | 68236512 | 360 | Promoter (2-3kb)     | ENSG00000262514 | 2455  |
| chr16 | 68236331 | 68236726 | 396 | Promoter (2-3kb)     | ENSG00000262514 | 2633  |
| chr16 | 68236366 | 68236725 | 360 | Promoter (2-3kb)     | ENSG00000262514 | 2668  |
| chr16 | 68257188 | 68257547 | 360 | Promoter (1-2kb)     | ENSG00000263276 | -1069 |
| chr16 | 68257248 | 68257643 | 396 | Promoter (<=1kb)     | ENSG00000263276 | -973  |
| chr16 | 68257957 | 68258316 | 360 | Promoter (<=1kb)     | ENSG00000263276 | -300  |
| chr16 | 68257972 | 68258367 | 396 | Promoter (<=1kb)     | ENSG00000263276 | -249  |
| chr16 | 68264093 | 68264452 | 360 | Promoter (1-2kb)     | ENSG00000262160 | -1045 |
| chr16 | 68264270 | 68264665 | 396 | Promoter (1-2kb)     | ENSG00000262160 | -1222 |
| chr16 | 68264484 | 68264879 | 396 | Promoter (1-2kb)     | ENSG00000262160 | -1436 |
| chr16 | 68265082 | 68265441 | 360 | Promoter (2-3kb)     | ENSG00000262160 | -2034 |
| chr16 | 68265357 | 68265752 | 396 | Promoter (2-3kb)     | ENSG00000262160 | -2309 |
| chr16 | 68265381 | 68265740 | 360 | Promoter (2-3kb)     | ENSG00000262160 | -2333 |
| chr16 | 68265985 | 68266344 | 360 | Promoter (2-3kb)     | ENSG00000262160 | -2937 |
| chr16 | 68266776 | 68267135 | 360 | Distal Intergenic    | ENSG00000262160 | -3728 |
| chr16 | 68266984 | 68267343 | 360 | Distal Intergenic    | ENSG00000262160 | -3936 |
| chr16 | 68268624 | 68269019 | 396 | Promoter (2-3kb)     | ENSG00000261469 | 2551  |
| chr16 | 68272632 | 68272991 | 360 | Promoter (1-2kb)     | ENSG00000261469 | -1062 |
| chr16 | 68298161 | 68298520 | 360 | Distal Intergenic    | ENSG00000260441 | -3815 |
| chr16 | 68299123 | 68299518 | 396 | Distal Intergenic    | ENSG00000260441 | -4777 |
| chr16 | 68627343 | 68627738 | 396 | Distal Intergenic    | ENSG00000260084 | -3928 |
| chr16 | 68678840 | 68679199 | 360 | Promoter (<=1kb)     | ENSG00000260577 | 872   |
| chr16 | 68968995 | 68969390 | 396 | Promoter (1-2kb)     | ENSG00000266801 | 1272  |
| chr16 | 68982494 | 68982889 | 396 | Promoter (<=1kb)     | ENSG00000260999 | -330  |
| chr16 | 68985645 | 68986040 | 396 | Distal Intergenic    | ENSG00000260999 | -3481 |
| chr16 | 69277239 | 69277598 | 360 | Promoter (2-3kb)     | ENSG00000265113 | 2787  |
| chr16 | 69496020 | 69496415 | 396 | Promoter (1-2kb)     | ENSG00000260108 | -1332 |
| chr16 | 69762089 | 69762448 | 360 | Promoter (1-2kb)     | ENSG00000262136 | 1173  |
| chr16 | 69762635 | 69762994 | 360 | Promoter (1-2kb)     | ENSG00000262136 | 1719  |
| chr16 | 70060522 | 70060917 | 396 | Intron (ENST000005:) | ENSG00000196696 | -4689 |
| chr16 | 70060546 | 70060905 | 360 | Intron (ENST000005:) | ENSG00000196696 | -4713 |
| chr16 | 70098911 | 70099306 | 396 | Promoter (<=1kb)     | ENSG00000196696 | 415   |
| chr16 | 70099233 | 70099628 | 396 | Promoter (<=1kb)     | ENSG00000196696 | 93    |
| chr16 | 70099523 | 70099918 | 396 | Promoter (<=1kb)     | ENSG00000196696 | 0     |
| chr16 | 70380448 | 70380807 | 360 | Promoter (<=1kb)     | ENSG00000261777 | 0     |
| chr16 | 70380981 | 70381376 | 396 | Promoter (<=1kb)     | ENSG00000261777 | -331  |
| chr16 | 70381147 | 70381506 | 360 | Promoter (<=1kb)     | ENSG00000261777 | -497  |
| chr16 | 70381611 | 70382006 | 396 | Promoter (<=1kb)     | ENSG00000261777 | -961  |
| chr16 | 70409486 | 70409845 | 360 | Distal Intergenic    | ENSG00000260111 | -3515 |
| chr16 | 70412246 | 70412641 | 396 | Promoter (<=1kb)     | ENSG00000260111 | -719  |
| chr16 | 70412328 | 70412687 | 360 | Promoter (<=1kb)     | ENSG00000260111 | -673  |
| chr16 | 70606697 | 70607056 | 360 | Distal Intergenic    | ENSG00000260023 | -3148 |
| chr16 | 70778074 | 70778433 | 360 | Promoter (2-3kb)     | ENSG00000260156 | -2527 |
| chr16 | 70778861 | 70779220 | 360 | Promoter (1-2kb)     | ENSG00000260156 | -1740 |
| chr16 | 70779579 | 70779974 | 396 | Promoter (<=1kb)     | ENSG00000260156 | -986  |
| chr16 | 70786612 | 70786971 | 360 | Promoter (2-3kb)     | ENSG00000214353 | -2030 |
| chr16 | 71330156 | 71330551 | 396 | Distal Intergenic    | ENSG00000261260 | -4935 |
| chr16 | 71337597 | 71337956 | 360 | Promoter (2-3kb)     | ENSG00000261260 | 2111  |
| chr16 | 71460837 | 71461232 | 396 | Promoter (<=1kb)     | ENSG00000261348 | -470  |
| chr16 | 71462005 | 71462364 | 360 | Promoter (1-2kb)     | ENSG00000261348 | -1638 |
| chr16 | 71462034 | 71462429 | 396 | Promoter (1-2kb)     | ENSG00000261348 | -1667 |
| chr16 | 71462236 | 71462631 | 396 | Promoter (1-2kb)     | ENSG00000261348 | -1869 |
| chr16 | 71462244 | 71462603 | 360 | Promoter (1-2kb)     | ENSG00000261348 | -1877 |
| chr16 | 71462538 | 71462897 | 360 | Promoter (2-3kb)     | ENSG00000261348 | -2171 |
| chr16 | 71464068 | 71464427 | 360 | Distal Intergenic    | ENSG00000261348 | -3701 |
| chr16 | 71492697 | 71493092 | 396 | Distal Intergenic    | ENSG00000247324 | -3089 |

|       |          |          |     |                     |                 |       |
|-------|----------|----------|-----|---------------------|-----------------|-------|
| chr16 | 71493150 | 71493545 | 396 | Promoter (2-3kb)    | ENSG00000247324 | -2636 |
| chr16 | 71572451 | 71572846 | 396 | Promoter (2-3kb)    | ENSG00000260015 | 2882  |
| chr16 | 71572556 | 71572915 | 360 | Promoter (2-3kb)    | ENSG00000260015 | 2813  |
| chr16 | 71573149 | 71573508 | 360 | Promoter (2-3kb)    | ENSG00000260015 | 2220  |
| chr16 | 71573355 | 71573714 | 360 | Promoter (2-3kb)    | ENSG00000260015 | 2014  |
| chr16 | 71595398 | 71595757 | 360 | Distal Intergenic   | ENSG00000260886 | -3935 |
| chr16 | 71596851 | 71597246 | 396 | Promoter (2-3kb)    | ENSG00000260886 | -2446 |
| chr16 | 71598623 | 71598982 | 360 | Promoter (<=1kb)    | ENSG00000260886 | -710  |
| chr16 | 71600333 | 71600692 | 360 | Promoter (<=1kb)    | ENSG00000260886 | 641   |
| chr16 | 71600532 | 71600891 | 360 | Promoter (<=1kb)    | ENSG00000260886 | 840   |
| chr16 | 71914869 | 71915228 | 360 | Promoter (<=1kb)    | ENSG00000261765 | 948   |
| chr16 | 71963441 | 71963800 | 360 | Promoter (<=1kb)    | ENSG00000263320 | -114  |
| chr16 | 71965384 | 71965779 | 396 | Promoter (1-2kb)    | ENSG00000263320 | 1470  |
| chr16 | 71965403 | 71965762 | 360 | Promoter (1-2kb)    | ENSG00000263320 | 1489  |
| chr16 | 72031264 | 72031623 | 360 | Promoter (2-3kb)    | ENSG00000187008 | 2254  |
| chr16 | 72036108 | 72036467 | 360 | Promoter (2-3kb)    | ENSG00000187008 | -2231 |
| chr16 | 72261113 | 72261472 | 360 | Promoter (2-3kb)    | ENSG00000261673 | -2070 |
| chr16 | 72456070 | 72456465 | 396 | Downstream (2-3kb)  | ENSG00000260664 | -3382 |
| chr16 | 72456205 | 72456564 | 360 | Downstream (2-3kb)  | ENSG00000260664 | -3283 |
| chr16 | 72456319 | 72456714 | 396 | Downstream (2-3kb)  | ENSG00000260664 | -3133 |
| chr16 | 72458527 | 72458886 | 360 | Promoter (<=1kb)    | ENSG00000260664 | -961  |
| chr16 | 72459972 | 72460331 | 360 | Promoter (<=1kb)    | ENSG00000260664 | 125   |
| chr16 | 72664504 | 72664899 | 396 | Promoter (2-3kb)    | ENSG00000261008 | -2919 |
| chr16 | 72664737 | 72665132 | 396 | Intron (ENST000005) | ENSG00000261008 | -3152 |
| chr16 | 72665033 | 72665392 | 360 | Intron (ENST000005) | ENSG00000261008 | -3448 |
| chr16 | 72822175 | 72822534 | 360 | Promoter (<=1kb)    | ENSG00000259901 | -608  |
| chr16 | 72837175 | 72837534 | 360 | Distal Intergenic   | ENSG00000259209 | -3353 |
| chr16 | 72838807 | 72839166 | 360 | Promoter (1-2kb)    | ENSG00000259209 | -1721 |
| chr16 | 73048463 | 73048822 | 360 | Promoter (<=1kb)    | ENSG00000272330 | -88   |
| chr16 | 74332946 | 74333341 | 396 | Promoter (2-3kb)    | ENSG00000261404 | -2286 |
| chr16 | 74367645 | 74368004 | 360 | Promoter (1-2kb)    | ENSG00000259972 | -1134 |
| chr16 | 74367669 | 74368064 | 396 | Promoter (1-2kb)    | ENSG00000259972 | -1158 |
| chr16 | 74368280 | 74368675 | 396 | Promoter (<=1kb)    | ENSG00000259972 | 569   |
| chr16 | 74368328 | 74368687 | 360 | Promoter (<=1kb)    | ENSG00000259972 | 557   |
| chr16 | 74454845 | 74455204 | 360 | Promoter (<=1kb)    | ENSG00000261170 | -814  |
| chr16 | 75147341 | 75147736 | 396 | Promoter (2-3kb)    | ENSG00000247033 | -2731 |
| chr16 | 75147378 | 75147737 | 360 | Promoter (2-3kb)    | ENSG00000247033 | -2768 |
| chr16 | 75148361 | 75148756 | 396 | Distal Intergenic   | ENSG00000247033 | -3751 |
| chr16 | 75148410 | 75148769 | 360 | Distal Intergenic   | ENSG00000247033 | -3800 |
| chr16 | 75148589 | 75148984 | 396 | Distal Intergenic   | ENSG00000247033 | -3979 |
| chr16 | 75148611 | 75148970 | 360 | Distal Intergenic   | ENSG00000247033 | -4001 |
| chr16 | 75149829 | 75150188 | 360 | Distal Intergenic   | ENSG00000261058 | -3268 |
| chr16 | 75149874 | 75150269 | 396 | Distal Intergenic   | ENSG00000261058 | -3187 |
| chr16 | 75153613 | 75154008 | 396 | Promoter (<=1kb)    | ENSG00000261058 | 157   |
| chr16 | 75416339 | 75416734 | 396 | Promoter (1-2kb)    | ENSG00000261783 | -1181 |
| chr16 | 75495268 | 75495663 | 396 | Promoter (1-2kb)    | ENSG00000261476 | -1353 |
| chr16 | 75506561 | 75506956 | 396 | Promoter (2-3kb)    | ENSG00000203472 | -2838 |
| chr16 | 75506736 | 75507095 | 360 | Promoter (2-3kb)    | ENSG00000203472 | -2699 |
| chr16 | 75640559 | 75640954 | 396 | Promoter (1-2kb)    | ENSG00000259992 | 1389  |
| chr16 | 75640561 | 75640920 | 360 | Promoter (1-2kb)    | ENSG00000259992 | 1423  |
| chr16 | 75645111 | 75645470 | 360 | Promoter (2-3kb)    | ENSG00000259992 | -2768 |
| chr16 | 75891904 | 75892299 | 396 | Promoter (2-3kb)    | ENSG00000261313 | 2431  |
| chr16 | 77469797 | 77470192 | 396 | Promoter (2-3kb)    | ENSG00000260701 | 2518  |
| chr16 | 77780503 | 77780898 | 396 | Distal Intergenic   | ENSG00000261707 | -3606 |
| chr16 | 77780517 | 77780876 | 360 | Distal Intergenic   | ENSG00000261707 | -3620 |
| chr16 | 78097721 | 78098116 | 396 | Distal Intergenic   | ENSG00000261540 | -4370 |
| chr16 | 79707604 | 79707963 | 360 | Promoter (2-3kb)    | ENSG00000260876 | -2042 |
| chr16 | 79828773 | 79829132 | 360 | Exon (ENST0000056)  | ENSG00000260876 | -3299 |

|       |          |          |     |                    |                 |       |
|-------|----------|----------|-----|--------------------|-----------------|-------|
| chr16 | 79828978 | 79829337 | 360 | Exon (ENST0000056  | ENSG00000260876 | -3094 |
| chr16 | 80100889 | 80101248 | 360 | Promoter (1-2kb)   | ENSG00000260706 | 1143  |
| chr16 | 80207698 | 80208093 | 396 | Intron (ENST000005 | ENSG00000261376 | -4933 |
| chr16 | 80664227 | 80664622 | 396 | Promoter (1-2kb)   | ENSG00000260064 | -1951 |
| chr16 | 80664892 | 80665251 | 360 | Promoter (2-3kb)   | ENSG00000260064 | -2616 |
| chr16 | 80924318 | 80924713 | 396 | Promoter (1-2kb)   | ENSG00000260896 | 1744  |
| chr16 | 81073243 | 81073602 | 360 | Distal Intergenic  | ENSG00000260213 | -3879 |
| chr16 | 81085222 | 81085581 | 360 | Downstream (1-2kb) | ENSG00000261141 | -3325 |
| chr16 | 81098894 | 81099253 | 360 | Intron (ENST000005 | ENSG00000261838 | -4206 |
| chr16 | 81100046 | 81100441 | 396 | Intron (ENST000005 | ENSG00000261838 | -3018 |
| chr16 | 81107153 | 81107512 | 360 | Promoter (1-2kb)   | ENSG00000261838 | 1550  |
| chr16 | 81107159 | 81107554 | 396 | Promoter (1-2kb)   | ENSG00000261838 | 1556  |
| chr16 | 81123414 | 81123773 | 360 | Promoter (2-3kb)   | ENSG00000260643 | -2158 |
| chr16 | 81766868 | 81767227 | 360 | Distal Intergenic  | ENSG00000261218 | -4626 |
| chr16 | 81768158 | 81768553 | 396 | Distal Intergenic  | ENSG00000261218 | -3300 |
| chr16 | 81768245 | 81768604 | 360 | Distal Intergenic  | ENSG00000261218 | -3249 |
| chr16 | 81768968 | 81769363 | 396 | Promoter (2-3kb)   | ENSG00000261218 | -2490 |
| chr16 | 81769008 | 81769367 | 360 | Promoter (2-3kb)   | ENSG00000261218 | -2486 |
| chr16 | 82170200 | 82170595 | 396 | Promoter (2-3kb)   | ENSG00000261235 | 2641  |
| chr16 | 83807342 | 83807701 | 360 | Promoter (<=1kb)   | ENSG00000260788 | -801  |
| chr16 | 83807564 | 83807923 | 360 | Promoter (1-2kb)   | ENSG00000260788 | -1023 |
| chr16 | 83807907 | 83808266 | 360 | Promoter (1-2kb)   | ENSG00000260788 | -1366 |
| chr16 | 83826151 | 83826510 | 360 | Intron (ENST000005 | ENSG00000260523 | -4756 |
| chr16 | 84504681 | 84505040 | 360 | Distal Intergenic  | ENSG00000261286 | -3714 |
| chr16 | 84504729 | 84505124 | 396 | Distal Intergenic  | ENSG00000261286 | -3762 |
| chr16 | 84524646 | 84525005 | 360 | Distal Intergenic  | ENSG00000261243 | -4200 |
| chr16 | 84622614 | 84623009 | 396 | Distal Intergenic  | ENSG00000261471 | -4990 |
| chr16 | 84628868 | 84629227 | 360 | Promoter (<=1kb)   | ENSG00000261471 | 869   |
| chr16 | 84629525 | 84629884 | 360 | Promoter (1-2kb)   | ENSG00000261471 | 1526  |
| chr16 | 84960024 | 84960383 | 360 | Promoter (1-2kb)   | ENSG00000260340 | -1576 |
| chr16 | 85317423 | 85317818 | 396 | Promoter (<=1kb)   | ENSG00000179219 | 859   |
| chr16 | 85614454 | 85614849 | 396 | Promoter (2-3kb)   | ENSG00000270124 | 2328  |
| chr16 | 85615016 | 85615411 | 396 | Promoter (1-2kb)   | ENSG00000270124 | 1766  |
| chr16 | 85615158 | 85615517 | 360 | Promoter (1-2kb)   | ENSG00000270124 | 1660  |
| chr16 | 85620850 | 85621245 | 396 | Distal Intergenic  | ENSG00000270124 | -3673 |
| chr16 | 85621151 | 85621546 | 396 | Distal Intergenic  | ENSG00000270124 | -3974 |
| chr16 | 85623111 | 85623470 | 360 | Promoter (2-3kb)   | ENSG00000260417 | -2402 |
| chr16 | 85625860 | 85626219 | 360 | Promoter (<=1kb)   | ENSG00000260417 | 0     |
| chr16 | 85625887 | 85626282 | 396 | Promoter (<=1kb)   | ENSG00000260417 | 15    |
| chr16 | 85775163 | 85775522 | 360 | Promoter (1-2kb)   | ENSG00000269898 | -1371 |
| chr16 | 86016500 | 86016859 | 360 | Promoter (1-2kb)   | ENSG00000269667 | 1144  |
| chr16 | 86193559 | 86193918 | 360 | Promoter (1-2kb)   | ENSG00000268078 | -1155 |
| chr16 | 86307695 | 86308054 | 360 | Promoter (1-2kb)   | ENSG00000268754 | 1297  |
| chr16 | 86307927 | 86308286 | 360 | Promoter (1-2kb)   | ENSG00000268754 | 1065  |
| chr16 | 86316963 | 86317358 | 396 | Promoter (2-3kb)   | ENSG00000268532 | -2675 |
| chr16 | 86372895 | 86373290 | 396 | Promoter (1-2kb)   | ENSG00000168367 | -1733 |
| chr16 | 86379643 | 86380002 | 360 | Promoter (<=1kb)   | ENSG00000168367 | -358  |
| chr16 | 86542481 | 86542840 | 360 | Promoter (<=1kb)   | ENSG00000268388 | 0     |
| chr16 | 86555140 | 86555499 | 360 | Promoter (2-3kb)   | ENSG00000270020 | 2004  |
| chr16 | 86555155 | 86555550 | 396 | Promoter (1-2kb)   | ENSG00000270020 | 1953  |
| chr16 | 86668241 | 86668600 | 360 | Promoter (2-3kb)   | ENSG00000260387 | 2151  |
| chr16 | 86668499 | 86668858 | 360 | Promoter (1-2kb)   | ENSG00000260387 | 1893  |
| chr16 | 87241103 | 87241462 | 360 | Distal Intergenic  | ENSG00000261095 | -4266 |
| chr16 | 87246152 | 87246511 | 360 | Promoter (<=1kb)   | ENSG00000261095 | 424   |
| chr16 | 87326338 | 87326697 | 360 | Promoter (<=1kb)   | ENSG00000261697 | -294  |
| chr16 | 87326510 | 87326905 | 396 | Promoter (<=1kb)   | ENSG00000261697 | -466  |
| chr16 | 87326563 | 87326922 | 360 | Promoter (<=1kb)   | ENSG00000261697 | -519  |
| chr16 | 87326780 | 87327139 | 360 | Promoter (<=1kb)   | ENSG00000261697 | -736  |

|       |          |          |     |                   |                 |       |
|-------|----------|----------|-----|-------------------|-----------------|-------|
| chr16 | 87329259 | 87329654 | 396 | Distal Intergenic | ENSG00000261697 | -3215 |
| chr16 | 87346176 | 87346535 | 360 | Distal Intergenic | ENSG00000270006 | -4580 |
| chr16 | 87346917 | 87347276 | 360 | Distal Intergenic | ENSG00000270006 | -3839 |
| chr16 | 87352879 | 87353274 | 396 | Promoter (1-2kb)  | ENSG00000270006 | 1764  |
| chr16 | 87352929 | 87353288 | 360 | Promoter (1-2kb)  | ENSG00000270006 | 1814  |
| chr16 | 87355688 | 87356083 | 396 | Distal Intergenic | ENSG00000270082 | -4510 |
| chr16 | 87355697 | 87356056 | 360 | Distal Intergenic | ENSG00000270082 | -4537 |
| chr16 | 87360173 | 87360568 | 396 | Promoter (<=1kb)  | ENSG00000270082 | -25   |
| chr16 | 87361782 | 87362141 | 360 | Promoter (1-2kb)  | ENSG00000270082 | 1189  |
| chr16 | 87391207 | 87391602 | 396 | Distal Intergenic | ENSG00000269901 | -4540 |
| chr16 | 87392048 | 87392443 | 396 | Distal Intergenic | ENSG00000269901 | -3699 |
| chr16 | 87392070 | 87392429 | 360 | Distal Intergenic | ENSG00000269901 | -3713 |
| chr16 | 87394208 | 87394603 | 396 | Promoter (1-2kb)  | ENSG00000269901 | -1539 |
| chr16 | 87398808 | 87399203 | 396 | Promoter (2-3kb)  | ENSG00000269901 | 2666  |
| chr16 | 87430861 | 87431220 | 360 | Promoter (2-3kb)  | ENSG00000261592 | 2681  |
| chr16 | 87523510 | 87523905 | 396 | Promoter (2-3kb)  | ENSG00000260750 | -2256 |
| chr16 | 87527400 | 87527759 | 360 | Promoter (<=1kb)  | ENSG00000260750 | -34   |
| chr16 | 87528734 | 87529093 | 360 | Promoter (<=1kb)  | ENSG00000260750 | 941   |
| chr16 | 87528796 | 87529191 | 396 | Promoter (1-2kb)  | ENSG00000260750 | 1003  |
| chr16 | 87528941 | 87529300 | 360 | Promoter (1-2kb)  | ENSG00000260750 | 1148  |
| chr16 | 87529731 | 87530090 | 360 | Promoter (1-2kb)  | ENSG00000260750 | 1938  |
| chr16 | 87529817 | 87530212 | 396 | Promoter (2-3kb)  | ENSG00000260750 | 2024  |
| chr16 | 87635603 | 87635962 | 360 | Promoter (<=1kb)  | ENSG00000269935 | 0     |
| chr16 | 87635675 | 87636070 | 396 | Promoter (<=1kb)  | ENSG00000269935 | 0     |
| chr16 | 87778993 | 87779388 | 396 | Promoter (1-2kb)  | ENSG00000260671 | 1924  |
| chr16 | 87779097 | 87779456 | 360 | Promoter (1-2kb)  | ENSG00000260671 | 1856  |
| chr16 | 87780024 | 87780419 | 396 | Promoter (<=1kb)  | ENSG00000260671 | 893   |
| chr16 | 87811994 | 87812389 | 396 | Promoter (<=1kb)  | ENSG00000260498 | 365   |
| chr16 | 87812125 | 87812484 | 360 | Promoter (<=1kb)  | ENSG00000260498 | 270   |
| chr16 | 87815614 | 87816009 | 396 | Promoter (2-3kb)  | ENSG00000260498 | -2634 |
| chr16 | 87815667 | 87816026 | 360 | Promoter (2-3kb)  | ENSG00000260498 | -2687 |
| chr16 | 87839645 | 87840040 | 396 | Promoter (<=1kb)  | ENSG00000260177 | 42    |
| chr16 | 87842053 | 87842448 | 396 | Promoter (1-2kb)  | ENSG00000260177 | -1971 |
| chr16 | 87842120 | 87842479 | 360 | Promoter (2-3kb)  | ENSG00000260177 | -2038 |
| chr16 | 87842998 | 87843393 | 396 | Promoter (2-3kb)  | ENSG00000260177 | -2916 |
| chr16 | 87843010 | 87843369 | 360 | Promoter (2-3kb)  | ENSG00000260177 | -2928 |
| chr16 | 87866679 | 87867038 | 360 | Distal Intergenic | ENSG00000260466 | -3100 |
| chr16 | 87866708 | 87867103 | 396 | Distal Intergenic | ENSG00000260466 | -3035 |
| chr16 | 87870658 | 87871053 | 396 | Promoter (<=1kb)  | ENSG00000260466 | 520   |
| chr16 | 87870912 | 87871271 | 360 | Promoter (<=1kb)  | ENSG00000260466 | 774   |
| chr16 | 87870969 | 87871364 | 396 | Promoter (<=1kb)  | ENSG00000260466 | 831   |
| chr16 | 87871733 | 87872092 | 360 | Promoter (1-2kb)  | ENSG00000260466 | 1595  |
| chr16 | 88119178 | 88119573 | 396 | Promoter (1-2kb)  | ENSG00000261193 | 1416  |
| chr16 | 88224199 | 88224594 | 396 | Promoter (2-3kb)  | ENSG00000261816 | 2679  |
| chr16 | 88736894 | 88737253 | 360 | Promoter (2-3kb)  | ENSG00000260630 | -2551 |
| chr16 | 88737099 | 88737458 | 360 | Promoter (2-3kb)  | ENSG00000260630 | -2346 |
| chr16 | 88737295 | 88737690 | 396 | Promoter (2-3kb)  | ENSG00000260630 | -2114 |
| chr16 | 88737317 | 88737676 | 360 | Promoter (2-3kb)  | ENSG00000260630 | -2128 |
| chr16 | 88759495 | 88759854 | 360 | Distal Intergenic | ENSG00000259813 | -3055 |
| chr16 | 88759762 | 88760121 | 360 | Promoter (2-3kb)  | ENSG00000259813 | -2788 |
| chr16 | 88760848 | 88761207 | 360 | Promoter (1-2kb)  | ENSG00000259813 | -1702 |
| chr16 | 88763552 | 88763947 | 396 | Promoter (<=1kb)  | ENSG00000259813 | 643   |
| chr16 | 88763855 | 88764214 | 360 | Promoter (<=1kb)  | ENSG00000259813 | 946   |
| chr16 | 88780740 | 88781099 | 360 | Distal Intergenic | ENSG00000260121 | -3924 |
| chr16 | 88782276 | 88782635 | 360 | Promoter (2-3kb)  | ENSG00000260121 | -2388 |
| chr16 | 88782501 | 88782860 | 360 | Promoter (2-3kb)  | ENSG00000260121 | -2163 |
| chr16 | 88783377 | 88783736 | 360 | Promoter (1-2kb)  | ENSG00000260121 | -1287 |
| chr16 | 88785418 | 88785813 | 396 | Promoter (<=1kb)  | ENSG00000260121 | 395   |

|       |          |          |     |                     |                 |       |
|-------|----------|----------|-----|---------------------|-----------------|-------|
| chr16 | 88785532 | 88785891 | 360 | Promoter (<=1kb)    | ENSG00000260121 | 509   |
| chr16 | 88787671 | 88788066 | 396 | Promoter (2-3kb)    | ENSG00000260121 | 2648  |
| chr16 | 88792882 | 88793241 | 360 | Distal Intergenic   | ENSG00000224888 | -4347 |
| chr16 | 88793087 | 88793446 | 360 | Distal Intergenic   | ENSG00000224888 | -4142 |
| chr16 | 88793384 | 88793743 | 360 | Distal Intergenic   | ENSG00000224888 | -3845 |
| chr16 | 88803170 | 88803565 | 396 | Promoter (<=1kb)    | ENSG00000224888 | 0     |
| chr16 | 88803373 | 88803768 | 396 | Promoter (<=1kb)    | ENSG00000224888 | 165   |
| chr16 | 88804763 | 88805122 | 360 | Promoter (1-2kb)    | ENSG00000224888 | 1555  |
| chr16 | 88805219 | 88805614 | 396 | Promoter (2-3kb)    | ENSG00000224888 | 2011  |
| chr16 | 88807354 | 88807749 | 396 | Promoter (<=1kb)    | ENSG00000260617 | -290  |
| chr16 | 88807555 | 88807950 | 396 | Promoter (<=1kb)    | ENSG00000260617 | -89   |
| chr16 | 88809980 | 88810375 | 396 | Promoter (<=1kb)    | ENSG00000182376 | 751   |
| chr16 | 88810469 | 88810864 | 396 | Promoter (1-2kb)    | ENSG00000182376 | 1240  |
| chr16 | 88811343 | 88811738 | 396 | Promoter (2-3kb)    | ENSG00000182376 | 2114  |
| chr16 | 88811361 | 88811720 | 360 | Promoter (2-3kb)    | ENSG00000182376 | 2132  |
| chr16 | 88811662 | 88812057 | 396 | Promoter (2-3kb)    | ENSG00000182376 | 2433  |
| chr16 | 88948785 | 88949144 | 360 | Promoter (<=1kb)    | ENSG00000259881 | -536  |
| chr16 | 89009394 | 89009789 | 396 | Distal Intergenic   | ENSG00000261226 | -3335 |
| chr16 | 89049052 | 89049447 | 396 | Promoter (<=1kb)    | ENSG00000259989 | -993  |
| chr16 | 89118522 | 89118917 | 396 | Promoter (<=1kb)    | ENSG00000256982 | 456   |
| chr16 | 89182899 | 89183258 | 360 | Promoter (1-2kb)    | ENSG00000261546 | -1212 |
| chr16 | 89183966 | 89184325 | 360 | Promoter (2-3kb)    | ENSG00000261546 | -2279 |
| chr16 | 89185369 | 89185728 | 360 | Distal Intergenic   | ENSG00000261546 | -3682 |
| chr16 | 89220602 | 89220961 | 360 | Distal Intergenic   | ENSG00000180422 | -4593 |
| chr16 | 89220816 | 89221175 | 360 | Distal Intergenic   | ENSG00000180422 | -4379 |
| chr16 | 89283228 | 89283587 | 360 | Promoter (<=1kb)    | ENSG00000259877 | 474   |
| chr16 | 89331564 | 89331959 | 396 | Promoter (1-2kb)    | ENSG00000260637 | 1979  |
| chr16 | 89338764 | 89339123 | 360 | Distal Intergenic   | ENSG00000260637 | -4826 |
| chr16 | 89338835 | 89339230 | 396 | Distal Intergenic   | ENSG00000260637 | -4897 |
| chr16 | 89363804 | 89364163 | 360 | Promoter (<=1kb)    | ENSG00000260279 | 0     |
| chr16 | 89383956 | 89384351 | 396 | Distal Intergenic   | ENSG00000261253 | -3190 |
| chr16 | 89384159 | 89384554 | 396 | Promoter (2-3kb)    | ENSG00000261253 | -2987 |
| chr16 | 89385037 | 89385432 | 396 | Promoter (2-3kb)    | ENSG00000261253 | -2109 |
| chr16 | 89482832 | 89483191 | 360 | Distal Intergenic   | ENSG00000261574 | -3860 |
| chr16 | 89490403 | 89490798 | 396 | Promoter (1-2kb)    | ENSG00000261692 | -1769 |
| chr16 | 89557372 | 89557731 | 360 | Promoter (2-3kb)    | ENSG00000261118 | 2470  |
| chr16 | 89559411 | 89559770 | 360 | Promoter (<=1kb)    | ENSG00000261118 | 431   |
| chr16 | 89560361 | 89560756 | 396 | Promoter (<=1kb)    | ENSG00000261118 | -160  |
| chr16 | 89560382 | 89560741 | 360 | Promoter (<=1kb)    | ENSG00000261118 | -181  |
| chr16 | 89560713 | 89561108 | 396 | Promoter (<=1kb)    | ENSG00000261118 | -512  |
| chr16 | 89561583 | 89561978 | 396 | Promoter (1-2kb)    | ENSG00000261118 | -1382 |
| chr16 | 89561870 | 89562265 | 396 | Promoter (1-2kb)    | ENSG00000261118 | -1669 |
| chr16 | 89563011 | 89563406 | 396 | Promoter (2-3kb)    | ENSG00000261118 | -2810 |
| chr16 | 89563214 | 89563609 | 396 | Intron (ENST000005) | ENSG00000261118 | -3013 |
| chr16 | 89571455 | 89571814 | 360 | Promoter (<=1kb)    | ENSG00000261118 | -587  |
| chr16 | 89572778 | 89573137 | 360 | Promoter (1-2kb)    | ENSG00000261118 | -1910 |
| chr16 | 89573359 | 89573718 | 360 | Promoter (2-3kb)    | ENSG00000261118 | -2491 |
| chr16 | 89971969 | 89972328 | 360 | Promoter (<=1kb)    | ENSG00000267048 | -237  |
| chr16 | 89972233 | 89972628 | 396 | Promoter (<=1kb)    | ENSG00000267048 | 0     |
| chr16 | 89972513 | 89972908 | 396 | Promoter (<=1kb)    | ENSG00000267048 | 0     |
| chr16 | 89972535 | 89972894 | 360 | Promoter (<=1kb)    | ENSG00000267048 | 0     |
| chr16 | 89972713 | 89973108 | 396 | Promoter (<=1kb)    | ENSG00000267048 | 148   |
| chr16 | 89972736 | 89973095 | 360 | Promoter (<=1kb)    | ENSG00000267048 | 171   |
| chr16 | 89973213 | 89973608 | 396 | Promoter (<=1kb)    | ENSG00000267048 | 648   |
| chr17 | 173331   | 173690   | 360 | Promoter (2-3kb)    | ENSG00000262920 | 2023  |
| chr17 | 200944   | 201303   | 360 | Promoter (1-2kb)    | ENSG00000262294 | -1126 |
| chr17 | 200976   | 201371   | 396 | Promoter (1-2kb)    | ENSG00000262294 | -1058 |
| chr17 | 203812   | 204171   | 360 | Promoter (<=1kb)    | ENSG00000262558 | -357  |

|       |         |         |     |                     |                 |       |
|-------|---------|---------|-----|---------------------|-----------------|-------|
| chr17 | 408469  | 408864  | 396 | Promoter (2-3kb)    | ENSG00000263015 | 2058  |
| chr17 | 776871  | 777266  | 396 | Distal Intergenic   | ENSG00000262133 | -3876 |
| chr17 | 777088  | 777483  | 396 | Distal Intergenic   | ENSG00000262133 | -3659 |
| chr17 | 781889  | 782284  | 396 | Promoter (<=1kb)    | ENSG00000262133 | 747   |
| chr17 | 782156  | 782515  | 360 | Promoter (1-2kb)    | ENSG00000262133 | 1014  |
| chr17 | 782164  | 782559  | 396 | Promoter (1-2kb)    | ENSG00000262133 | 1022  |
| chr17 | 782797  | 783192  | 396 | Promoter (1-2kb)    | ENSG00000262133 | 1655  |
| chr17 | 1931854 | 1932249 | 396 | Distal Intergenic   | ENSG00000262869 | -4896 |
| chr17 | 1995959 | 1996354 | 396 | Promoter (2-3kb)    | ENSG00000262810 | 2984  |
| chr17 | 2868301 | 2868660 | 360 | Promoter (<=1kb)    | ENSG00000262884 | 529   |
| chr17 | 2872840 | 2873199 | 360 | Distal Intergenic   | ENSG00000262884 | -3651 |
| chr17 | 3483440 | 3483835 | 396 | Promoter (1-2kb)    | ENSG00000263338 | -1293 |
| chr17 | 3634410 | 3634769 | 360 | Promoter (1-2kb)    | ENSG00000262358 | 1755  |
| chr17 | 3634609 | 3634968 | 360 | Promoter (1-2kb)    | ENSG00000262358 | 1954  |
| chr17 | 3634792 | 3635187 | 396 | Promoter (2-3kb)    | ENSG00000262358 | 2137  |
| chr17 | 4062205 | 4062564 | 360 | Distal Intergenic   | ENSG00000263165 | -4640 |
| chr17 | 4708179 | 4708538 | 360 | Promoter (1-2kb)    | ENSG00000262165 | 1770  |
| chr17 | 4710131 | 4710526 | 396 | Promoter (<=1kb)    | ENSG00000262165 | 0     |
| chr17 | 4872100 | 4872459 | 360 | Promoter (<=1kb)    | ENSG00000262429 | 810   |
| chr17 | 4981141 | 4981536 | 396 | Promoter (<=1kb)    | ENSG00000262693 | 0     |
| chr17 | 5093606 | 5094001 | 396 | Promoter (1-2kb)    | ENSG00000261879 | -1378 |
| chr17 | 5093673 | 5094032 | 360 | Promoter (1-2kb)    | ENSG00000261879 | -1347 |
| chr17 | 5126567 | 5126962 | 396 | Promoter (<=1kb)    | ENSG00000261879 | 0     |
| chr17 | 6557733 | 6558128 | 396 | Promoter (<=1kb)    | ENSG00000261996 | 200   |
| chr17 | 6919459 | 6919854 | 396 | Promoter (1-2kb)    | ENSG00000267532 | 1166  |
| chr17 | 6919662 | 6920057 | 396 | Promoter (<=1kb)    | ENSG00000267532 | 963   |
| chr17 | 7184072 | 7184467 | 396 | Promoter (2-3kb)    | ENSG00000263342 | 2923  |
| chr17 | 7191098 | 7191457 | 360 | Distal Intergenic   | ENSG00000263342 | -3708 |
| chr17 | 7191624 | 7192019 | 396 | Distal Intergenic   | ENSG00000263342 | -4234 |
| chr17 | 7469583 | 7469978 | 396 | Promoter (2-3kb)    | ENSG00000265500 | 2979  |
| chr17 | 7480039 | 7480434 | 396 | Promoter (<=1kb)    | ENSG00000264772 | -839  |
| chr17 | 7484190 | 7484585 | 396 | Promoter (1-2kb)    | ENSG00000233223 | 1743  |
| chr17 | 7484252 | 7484611 | 360 | Promoter (1-2kb)    | ENSG00000233223 | 1717  |
| chr17 | 7484474 | 7484869 | 396 | Promoter (1-2kb)    | ENSG00000233223 | 1459  |
| chr17 | 8079221 | 8079580 | 360 | Promoter (<=1kb)    | ENSG00000266824 | -550  |
| chr17 | 8125044 | 8125403 | 360 | Promoter (1-2kb)    | ENSG00000178977 | 1958  |
| chr17 | 8127350 | 8127709 | 360 | Promoter (<=1kb)    | ENSG00000178977 | 0     |
| chr17 | 8176270 | 8176665 | 396 | Distal Intergenic   | ENSG00000269947 | -4416 |
| chr17 | 8176363 | 8176722 | 360 | Distal Intergenic   | ENSG00000269947 | -4359 |
| chr17 | 8176602 | 8176961 | 360 | Distal Intergenic   | ENSG00000269947 | -4120 |
| chr17 | 8218855 | 8219250 | 396 | Promoter (2-3kb)    | ENSG00000226871 | 2780  |
| chr17 | 8220636 | 8221031 | 396 | Promoter (<=1kb)    | ENSG00000226871 | 999   |
| chr17 | 8220659 | 8221018 | 360 | Promoter (1-2kb)    | ENSG00000226871 | 1012  |
| chr17 | 8221574 | 8221969 | 396 | Promoter (<=1kb)    | ENSG00000226871 | 61    |
| chr17 | 8221622 | 8221981 | 360 | Promoter (<=1kb)    | ENSG00000226871 | 49    |
| chr17 | 8221802 | 8222197 | 396 | Promoter (<=1kb)    | ENSG00000226871 | 0     |
| chr17 | 8222061 | 8222456 | 396 | Promoter (<=1kb)    | ENSG00000226871 | -31   |
| chr17 | 8222133 | 8222492 | 360 | Promoter (<=1kb)    | ENSG00000226871 | -103  |
| chr17 | 8222762 | 8223121 | 360 | Promoter (<=1kb)    | ENSG00000226871 | -732  |
| chr17 | 8222964 | 8223323 | 360 | Promoter (<=1kb)    | ENSG00000226871 | -934  |
| chr17 | 8223690 | 8224049 | 360 | Promoter (1-2kb)    | ENSG00000226871 | -1660 |
| chr17 | 8223892 | 8224251 | 360 | Promoter (1-2kb)    | ENSG00000226871 | -1862 |
| chr17 | 8275816 | 8276175 | 360 | Intron (ENST000005) | ENSG00000265749 | -3153 |
| chr17 | 8872127 | 8872522 | 396 | Promoter (1-2kb)    | ENSG00000265975 | 1287  |
| chr17 | 8872354 | 8872749 | 396 | Promoter (1-2kb)    | ENSG00000265975 | 1514  |
| chr17 | 8872563 | 8872958 | 396 | Promoter (1-2kb)    | ENSG00000265975 | 1723  |
| chr17 | 9367558 | 9367917 | 360 | Promoter (<=1kb)    | ENSG00000262815 | -142  |
| chr17 | 9451024 | 9451383 | 360 | Promoter (<=1kb)    | ENSG00000263051 | 409   |

|       |          |          |     |                   |                 |       |
|-------|----------|----------|-----|-------------------|-----------------|-------|
| chr17 | 9453429  | 9453824  | 396 | Promoter (2-3kb)  | ENSG00000263051 | 2814  |
| chr17 | 10697161 | 10697556 | 396 | Promoter (1-2kb)  | ENSG00000266114 | 1785  |
| chr17 | 10697281 | 10697640 | 360 | Promoter (1-2kb)  | ENSG00000266114 | 1905  |
| chr17 | 12898385 | 12898780 | 396 | Distal Intergenic | ENSG00000263707 | -4458 |
| chr17 | 14209576 | 14209935 | 360 | Promoter (2-3kb)  | ENSG00000266709 | 2405  |
| chr17 | 14209846 | 14210205 | 360 | Promoter (2-3kb)  | ENSG00000266709 | 2675  |
| chr17 | 14630619 | 14630978 | 360 | Promoter (1-2kb)  | ENSG00000226130 | 1573  |
| chr17 | 14685127 | 14685522 | 396 | Promoter (1-2kb)  | ENSG00000205325 | -1607 |
| chr17 | 15007808 | 15008203 | 396 | Promoter (1-2kb)  | ENSG00000265163 | 1301  |
| chr17 | 15434416 | 15434775 | 360 | Promoter (<=1kb)  | ENSG00000266538 | -13   |
| chr17 | 15434558 | 15434953 | 396 | Promoter (<=1kb)  | ENSG00000266538 | -155  |
| chr17 | 15437836 | 15438195 | 360 | Distal Intergenic | ENSG00000266538 | -3433 |
| chr17 | 16285904 | 16286299 | 396 | Promoter (<=1kb)  | ENSG00000265401 | 0     |
| chr17 | 16288635 | 16288994 | 360 | Promoter (2-3kb)  | ENSG00000265401 | -2652 |
| chr17 | 17090601 | 17090996 | 396 | Promoter (1-2kb)  | ENSG00000263624 | -1733 |
| chr17 | 17090729 | 17091088 | 360 | Promoter (1-2kb)  | ENSG00000263624 | -1861 |
| chr17 | 17142294 | 17142689 | 396 | Promoter (2-3kb)  | ENSG00000266498 | -2862 |
| chr17 | 17406188 | 17406583 | 396 | Distal Intergenic | ENSG00000265511 | -4082 |
| chr17 | 17494378 | 17494773 | 396 | Promoter (<=1kb)  | ENSG00000264666 | 0     |
| chr17 | 17494644 | 17495039 | 396 | Promoter (<=1kb)  | ENSG00000264666 | 0     |
| chr17 | 17495910 | 17496269 | 360 | Promoter (1-2kb)  | ENSG00000264666 | 1168  |
| chr17 | 17496170 | 17496565 | 396 | Promoter (1-2kb)  | ENSG00000264666 | 1428  |
| chr17 | 17497122 | 17497481 | 360 | Promoter (2-3kb)  | ENSG00000264666 | 2380  |
| chr17 | 17580895 | 17581254 | 360 | Promoter (<=1kb)  | ENSG00000223979 | 0     |
| chr17 | 17670807 | 17671166 | 360 | Promoter (2-3kb)  | ENSG00000237328 | 2969  |
| chr17 | 17679587 | 17679946 | 360 | Promoter (1-2kb)  | ENSG00000264167 | -1149 |
| chr17 | 17680966 | 17681325 | 360 | Promoter (<=1kb)  | ENSG00000264167 | 0     |
| chr17 | 17682120 | 17682479 | 360 | Promoter (<=1kb)  | ENSG00000226746 | 364   |
| chr17 | 18087666 | 18088061 | 396 | Promoter (<=1kb)  | ENSG00000266677 | 0     |
| chr17 | 18087694 | 18088053 | 360 | Promoter (<=1kb)  | ENSG00000266677 | 0     |
| chr17 | 18224769 | 18225164 | 396 | Promoter (2-3kb)  | ENSG00000267350 | -2372 |
| chr17 | 18224841 | 18225200 | 360 | Promoter (2-3kb)  | ENSG00000267350 | -2336 |
| chr17 | 18225975 | 18226334 | 360 | Promoter (1-2kb)  | ENSG00000267350 | -1202 |
| chr17 | 18226350 | 18226745 | 396 | Promoter (<=1kb)  | ENSG00000267350 | -791  |
| chr17 | 18226589 | 18226948 | 360 | Promoter (<=1kb)  | ENSG00000267350 | -588  |
| chr17 | 18315242 | 18315601 | 360 | Promoter (<=1kb)  | ENSG00000220161 | 769   |
| chr17 | 18326407 | 18326802 | 396 | Promoter (<=1kb)  | ENSG00000205266 | -833  |
| chr17 | 18326417 | 18326776 | 360 | Promoter (<=1kb)  | ENSG00000205266 | -859  |
| chr17 | 18855972 | 18856367 | 396 | Promoter (1-2kb)  | ENSG00000196893 | 1095  |
| chr17 | 18856174 | 18856569 | 396 | Promoter (<=1kb)  | ENSG00000196893 | 893   |
| chr17 | 18857491 | 18857886 | 396 | Promoter (<=1kb)  | ENSG00000196893 | -29   |
| chr17 | 18857697 | 18858092 | 396 | Promoter (<=1kb)  | ENSG00000196893 | -235  |
| chr17 | 18858603 | 18858998 | 396 | Promoter (1-2kb)  | ENSG00000196893 | -1141 |
| chr17 | 18858858 | 18859253 | 396 | Promoter (1-2kb)  | ENSG00000196893 | -1396 |
| chr17 | 18981100 | 18981495 | 396 | Promoter (<=1kb)  | ENSG00000230197 | 4     |
| chr17 | 18983215 | 18983574 | 360 | Promoter (<=1kb)  | ENSG00000230197 | 0     |
| chr17 | 18983419 | 18983778 | 360 | Promoter (<=1kb)  | ENSG00000230197 | 118   |
| chr17 | 18996677 | 18997036 | 360 | Promoter (1-2kb)  | ENSG00000263394 | -1539 |
| chr17 | 19237462 | 19237857 | 396 | Promoter (1-2kb)  | ENSG00000265263 | 1583  |
| chr17 | 19237666 | 19238061 | 396 | Promoter (1-2kb)  | ENSG00000265263 | 1379  |
| chr17 | 19352491 | 19352886 | 396 | Promoter (<=1kb)  | ENSG00000235979 | 844   |
| chr17 | 19361839 | 19362234 | 396 | Promoter (1-2kb)  | ENSG00000231477 | 1446  |
| chr17 | 19362907 | 19363302 | 396 | Promoter (<=1kb)  | ENSG00000235979 | 746   |
| chr17 | 19363170 | 19363529 | 360 | Promoter (<=1kb)  | ENSG00000235979 | 519   |
| chr17 | 19363370 | 19363729 | 360 | Promoter (<=1kb)  | ENSG00000235979 | 319   |
| chr17 | 19365058 | 19365417 | 360 | Promoter (<=1kb)  | ENSG00000235979 | -750  |
| chr17 | 19457677 | 19458036 | 360 | Promoter (2-3kb)  | ENSG00000266079 | -2488 |
| chr17 | 19550252 | 19550611 | 360 | Promoter (2-3kb)  | ENSG00000264932 | 2289  |

|       |          |          |     |                   |                 |       |
|-------|----------|----------|-----|-------------------|-----------------|-------|
| chr17 | 19550677 | 19551072 | 396 | Promoter (1-2kb)  | ENSG00000264932 | 1828  |
| chr17 | 19638975 | 19639370 | 396 | Promoter (1-2kb)  | ENSG00000264785 | -1625 |
| chr17 | 19830288 | 19830647 | 360 | Promoter (2-3kb)  | ENSG00000266126 | 2403  |
| chr17 | 20088309 | 20088704 | 396 | Promoter (<=1kb)  | ENSG00000263494 | 0     |
| chr17 | 20088561 | 20088956 | 396 | Promoter (<=1kb)  | ENSG00000263494 | 166   |
| chr17 | 27273563 | 27273958 | 396 | Promoter (1-2kb)  | ENSG00000265908 | 1749  |
| chr17 | 28878467 | 28878862 | 396 | Promoter (<=1kb)  | ENSG00000263860 | -260  |
| chr17 | 28902025 | 28902420 | 396 | Promoter (<=1kb)  | ENSG00000231421 | -587  |
| chr17 | 28902966 | 28903361 | 396 | Promoter (<=1kb)  | ENSG00000214719 | -121  |
| chr17 | 28937578 | 28937973 | 396 | Promoter (2-3kb)  | ENSG00000214719 | 2902  |
| chr17 | 29287838 | 29288197 | 360 | Distal Intergenic | ENSG00000230113 | -3859 |
| chr17 | 29292996 | 29293391 | 396 | Promoter (<=1kb)  | ENSG00000265743 | -478  |
| chr17 | 29293991 | 29294386 | 396 | Promoter (1-2kb)  | ENSG00000265743 | -1473 |
| chr17 | 29294200 | 29294595 | 396 | Promoter (1-2kb)  | ENSG00000265743 | -1682 |
| chr17 | 29294215 | 29294574 | 360 | Promoter (1-2kb)  | ENSG00000265743 | -1697 |
| chr17 | 30605186 | 30605581 | 396 | Promoter (2-3kb)  | ENSG00000263674 | 2391  |
| chr17 | 30607310 | 30607669 | 360 | Promoter (<=1kb)  | ENSG00000263674 | 303   |
| chr17 | 30734270 | 30734629 | 360 | Distal Intergenic | ENSG00000266385 | -3607 |
| chr17 | 30760891 | 30761250 | 360 | Promoter (2-3kb)  | ENSG00000264083 | 2905  |
| chr17 | 30824332 | 30824727 | 396 | Promoter (1-2kb)  | ENSG00000266718 | 1778  |
| chr17 | 30858183 | 30858578 | 396 | Promoter (1-2kb)  | ENSG00000265337 | -1116 |
| chr17 | 30858426 | 30858821 | 396 | Promoter (1-2kb)  | ENSG00000265337 | -1359 |
| chr17 | 31859593 | 31859952 | 360 | Promoter (<=1kb)  | ENSG00000265544 | 827   |
| chr17 | 32004235 | 32004630 | 396 | Promoter (2-3kb)  | ENSG00000264643 | -2966 |
| chr17 | 32007047 | 32007406 | 360 | Promoter (<=1kb)  | ENSG00000264643 | -190  |
| chr17 | 32301489 | 32301848 | 360 | Promoter (1-2kb)  | ENSG00000263435 | -1702 |
| chr17 | 32410667 | 32411026 | 360 | Promoter (1-2kb)  | ENSG00000263485 | -1424 |
| chr17 | 32444271 | 32444666 | 396 | Promoter (1-2kb)  | ENSG00000265775 | 1235  |
| chr17 | 32444548 | 32444943 | 396 | Promoter (<=1kb)  | ENSG00000265775 | 958   |
| chr17 | 32444653 | 32445012 | 360 | Promoter (<=1kb)  | ENSG00000265775 | 889   |
| chr17 | 32483563 | 32483922 | 360 | Distal Intergenic | ENSG00000263571 | -4834 |
| chr17 | 35036370 | 35036729 | 360 | Distal Intergenic | ENSG00000267499 | -4474 |
| chr17 | 35972673 | 35973068 | 396 | Promoter (2-3kb)  | ENSG00000267542 | 2886  |
| chr17 | 36001166 | 36001561 | 396 | Promoter (1-2kb)  | ENSG00000267668 | -1415 |
| chr17 | 36001641 | 36002036 | 396 | Promoter (<=1kb)  | ENSG00000267668 | -940  |
| chr17 | 36610597 | 36610956 | 360 | Promoter (1-2kb)  | ENSG00000260833 | -1909 |
| chr17 | 37076937 | 37077296 | 360 | Promoter (<=1kb)  | ENSG00000265784 | 726   |
| chr17 | 37082784 | 37083143 | 360 | Promoter (1-2kb)  | ENSG00000263874 | 1363  |
| chr17 | 37407241 | 37407600 | 360 | Promoter (2-3kb)  | ENSG00000266753 | 2950  |
| chr17 | 37407313 | 37407708 | 396 | Promoter (2-3kb)  | ENSG00000266753 | 2842  |
| chr17 | 37407528 | 37407923 | 396 | Promoter (2-3kb)  | ENSG00000266753 | 2627  |
| chr17 | 38454645 | 38455004 | 360 | Distal Intergenic | ENSG00000270145 | -4453 |
| chr17 | 38455902 | 38456297 | 396 | Distal Intergenic | ENSG00000270145 | -3160 |
| chr17 | 38672234 | 38672593 | 360 | Promoter (<=1kb)  | ENSG00000266088 | -685  |
| chr17 | 38673772 | 38674131 | 360 | Promoter (<=1kb)  | ENSG00000266088 | 494   |
| chr17 | 38674205 | 38674600 | 396 | Promoter (<=1kb)  | ENSG00000266088 | 927   |
| chr17 | 38674504 | 38674863 | 360 | Promoter (1-2kb)  | ENSG00000266088 | 1226  |
| chr17 | 38674966 | 38675361 | 396 | Promoter (1-2kb)  | ENSG00000266088 | 1688  |
| chr17 | 38684560 | 38684919 | 360 | Promoter (2-3kb)  | ENSG00000266088 | 2747  |
| chr17 | 39560468 | 39560863 | 396 | Promoter (1-2kb)  | ENSG00000234859 | 1793  |
| chr17 | 39653911 | 39654270 | 360 | Promoter (2-3kb)  | ENSG00000229732 | -2965 |
| chr17 | 39714422 | 39714781 | 360 | Distal Intergenic | ENSG00000226629 | -3675 |
| chr17 | 40086767 | 40087126 | 360 | Promoter (<=1kb)  | ENSG00000204815 | 0     |
| chr17 | 40191419 | 40191814 | 396 | Promoter (<=1kb)  | ENSG00000270010 | -667  |
| chr17 | 40191593 | 40191952 | 360 | Promoter (<=1kb)  | ENSG00000270010 | -841  |
| chr17 | 40194283 | 40194678 | 396 | Promoter (<=1kb)  | ENSG00000267221 | 457   |
| chr17 | 40194506 | 40194901 | 396 | Promoter (<=1kb)  | ENSG00000267221 | 234   |
| chr17 | 40197876 | 40198271 | 396 | Promoter (2-3kb)  | ENSG00000267221 | -2741 |



|       |          |          |     |                   |                 |       |
|-------|----------|----------|-----|-------------------|-----------------|-------|
| chr17 | 40303025 | 40303420 | 396 | Distal Intergenic | ENSG00000267658 | -3198 |
| chr17 | 40303083 | 40303442 | 360 | Distal Intergenic | ENSG00000267658 | -3176 |
| chr17 | 40303228 | 40303623 | 396 | Promoter (2-3kb)  | ENSG00000267658 | -2995 |
| chr17 | 40303286 | 40303645 | 360 | Promoter (2-3kb)  | ENSG00000267658 | -2973 |
| chr17 | 40303793 | 40304188 | 396 | Promoter (2-3kb)  | ENSG00000267658 | -2430 |
| chr17 | 40307017 | 40307412 | 396 | Promoter (<=1kb)  | ENSG00000267658 | 399   |
| chr17 | 40308778 | 40309173 | 396 | Promoter (2-3kb)  | ENSG00000267658 | 2160  |
| chr17 | 40416762 | 40417121 | 360 | Distal Intergenic | ENSG00000267758 | -3484 |
| chr17 | 40417455 | 40417850 | 396 | Promoter (2-3kb)  | ENSG00000267758 | -2755 |
| chr17 | 40417496 | 40417855 | 360 | Promoter (2-3kb)  | ENSG00000267758 | -2750 |
| chr17 | 40418681 | 40419040 | 360 | Promoter (1-2kb)  | ENSG00000267758 | -1565 |
| chr17 | 40420414 | 40420809 | 396 | Promoter (<=1kb)  | ENSG00000267758 | 0     |
| chr17 | 40646442 | 40646837 | 396 | Promoter (1-2kb)  | ENSG00000267222 | -1048 |
| chr17 | 40647605 | 40647964 | 360 | Promoter (<=1kb)  | ENSG00000267222 | 0     |
| chr17 | 40647730 | 40648125 | 396 | Promoter (<=1kb)  | ENSG00000267222 | 0     |
| chr17 | 40647886 | 40648245 | 360 | Promoter (<=1kb)  | ENSG00000267222 | 1     |
| chr17 | 40648027 | 40648422 | 396 | Promoter (<=1kb)  | ENSG00000267222 | 142   |
| chr17 | 40664031 | 40664426 | 396 | Promoter (2-3kb)  | ENSG00000267632 | 2229  |
| chr17 | 40910052 | 40910447 | 396 | Promoter (2-3kb)  | ENSG00000197291 | 2582  |
| chr17 | 40916103 | 40916462 | 360 | Promoter (2-3kb)  | ENSG00000197291 | -2828 |
| chr17 | 41048201 | 41048560 | 360 | Promoter (2-3kb)  | ENSG00000213373 | 2157  |
| chr17 | 41049876 | 41050235 | 360 | Promoter (<=1kb)  | ENSG00000213373 | 482   |
| chr17 | 41052713 | 41053072 | 360 | Promoter (1-2kb)  | ENSG00000213373 | -1962 |
| chr17 | 41326178 | 41326537 | 360 | Distal Intergenic | ENSG00000267002 | -3758 |
| chr17 | 41466737 | 41467096 | 360 | Promoter (<=1kb)  | ENSG00000188825 | -170  |
| chr17 | 41522229 | 41522588 | 360 | Promoter (<=1kb)  | ENSG00000267151 | 55    |
| chr17 | 41861278 | 41861637 | 360 | Promoter (<=1kb)  | ENSG00000267604 | 413   |
| chr17 | 41861312 | 41861707 | 396 | Promoter (<=1kb)  | ENSG00000267604 | 343   |
| chr17 | 41864441 | 41864800 | 360 | Promoter (2-3kb)  | ENSG00000267604 | -2391 |
| chr17 | 41864895 | 41865254 | 360 | Promoter (2-3kb)  | ENSG00000267604 | -2845 |
| chr17 | 41865115 | 41865510 | 396 | Distal Intergenic | ENSG00000267604 | -3065 |
| chr17 | 42002782 | 42003177 | 396 | Promoter (1-2kb)  | ENSG00000267420 | -1754 |
| chr17 | 42003096 | 42003491 | 396 | Promoter (1-2kb)  | ENSG00000267420 | -1440 |
| chr17 | 42003274 | 42003633 | 360 | Promoter (1-2kb)  | ENSG00000267420 | -1298 |
| chr17 | 42189160 | 42189519 | 360 | Distal Intergenic | ENSG00000267638 | -3761 |
| chr17 | 42193442 | 42193837 | 396 | Promoter (<=1kb)  | ENSG00000267638 | 162   |
| chr17 | 42193687 | 42194082 | 396 | Promoter (<=1kb)  | ENSG00000267638 | 407   |
| chr17 | 42194326 | 42194685 | 360 | Promoter (1-2kb)  | ENSG00000267638 | 1046  |
| chr17 | 42194564 | 42194923 | 360 | Promoter (1-2kb)  | ENSG00000267638 | 1284  |
| chr17 | 42272773 | 42273168 | 396 | Distal Intergenic | ENSG00000267394 | -3082 |
| chr17 | 42273036 | 42273431 | 396 | Promoter (2-3kb)  | ENSG00000267394 | -2819 |
| chr17 | 42276666 | 42277025 | 360 | Promoter (<=1kb)  | ENSG00000267394 | 416   |
| chr17 | 42276704 | 42277099 | 396 | Promoter (<=1kb)  | ENSG00000267394 | 454   |
| chr17 | 42278874 | 42279233 | 360 | Promoter (2-3kb)  | ENSG00000267394 | 2624  |
| chr17 | 42386471 | 42386866 | 396 | Promoter (<=1kb)  | ENSG00000267750 | -710  |
| chr17 | 42387237 | 42387596 | 360 | Promoter (1-2kb)  | ENSG00000267750 | -1476 |
| chr17 | 42388020 | 42388415 | 396 | Promoter (2-3kb)  | ENSG00000267750 | -2259 |
| chr17 | 42388596 | 42388991 | 396 | Promoter (2-3kb)  | ENSG00000267750 | -2835 |
| chr17 | 42388714 | 42389073 | 360 | Promoter (2-3kb)  | ENSG00000267750 | -2953 |
| chr17 | 42389606 | 42390001 | 396 | Promoter (2-3kb)  | ENSG00000267750 | 2682  |
| chr17 | 42390401 | 42390796 | 396 | Promoter (1-2kb)  | ENSG00000267750 | 1887  |
| chr17 | 42393800 | 42394195 | 396 | Promoter (1-2kb)  | ENSG00000267750 | -1117 |
| chr17 | 42394025 | 42394420 | 396 | Promoter (1-2kb)  | ENSG00000267750 | -1342 |
| chr17 | 42403066 | 42403425 | 360 | Promoter (2-3kb)  | ENSG00000267211 | -2556 |
| chr17 | 42406099 | 42406494 | 396 | Promoter (<=1kb)  | ENSG00000267211 | 118   |
| chr17 | 42866277 | 42866636 | 360 | Distal Intergenic | ENSG00000267505 | -3931 |
| chr17 | 42867337 | 42867696 | 360 | Promoter (2-3kb)  | ENSG00000267505 | -2871 |
| chr17 | 42875183 | 42875542 | 360 | Promoter (<=1kb)  | ENSG00000267405 | -32   |

|       |          |          |     |                    |                 |       |
|-------|----------|----------|-----|--------------------|-----------------|-------|
| chr17 | 42878520 | 42878879 | 360 | Distal Intergenic  | ENSG00000267405 | -3369 |
| chr17 | 42979863 | 42980222 | 360 | Promoter (1-2kb)   | ENSG00000224911 | 1692  |
| chr17 | 42980283 | 42980678 | 396 | Promoter (1-2kb)   | ENSG00000224911 | 1236  |
| chr17 | 43021889 | 43022248 | 360 | Distal Intergenic  | ENSG00000267334 | -3032 |
| chr17 | 43021911 | 43022306 | 396 | Promoter (2-3kb)   | ENSG00000267334 | -2974 |
| chr17 | 43022118 | 43022513 | 396 | Promoter (2-3kb)   | ENSG00000267334 | -2767 |
| chr17 | 43022604 | 43022963 | 360 | Promoter (2-3kb)   | ENSG00000267334 | -2317 |
| chr17 | 43024580 | 43024939 | 360 | Promoter (<=1kb)   | ENSG00000267334 | -341  |
| chr17 | 43024783 | 43025142 | 360 | Promoter (<=1kb)   | ENSG00000267334 | -138  |
| chr17 | 43057790 | 43058149 | 360 | Promoter (1-2kb)   | ENSG00000267788 | -1733 |
| chr17 | 43060654 | 43061013 | 360 | Promoter (<=1kb)   | ENSG00000267788 | 772   |
| chr17 | 43251528 | 43251923 | 396 | Promoter (2-3kb)   | ENSG00000267288 | -2577 |
| chr17 | 43315320 | 43315679 | 360 | Promoter (2-3kb)   | ENSG00000233175 | 2885  |
| chr17 | 43315550 | 43315909 | 360 | Promoter (2-3kb)   | ENSG00000233175 | 2655  |
| chr17 | 43315786 | 43316181 | 396 | Promoter (2-3kb)   | ENSG00000233175 | 2383  |
| chr17 | 43315865 | 43316224 | 360 | Promoter (2-3kb)   | ENSG00000233175 | 2340  |
| chr17 | 43316075 | 43316434 | 360 | Promoter (2-3kb)   | ENSG00000233175 | 2130  |
| chr17 | 43318650 | 43319009 | 360 | Promoter (<=1kb)   | ENSG00000233175 | -86   |
| chr17 | 43332539 | 43332934 | 396 | Promoter (<=1kb)   | ENSG00000267278 | 148   |
| chr17 | 43334097 | 43334456 | 360 | Promoter (1-2kb)   | ENSG00000267278 | 1706  |
| chr17 | 43334152 | 43334547 | 396 | Promoter (1-2kb)   | ENSG00000267278 | 1761  |
| chr17 | 43360984 | 43361379 | 396 | Promoter (2-3kb)   | ENSG00000006062 | 2945  |
| chr17 | 43361036 | 43361395 | 360 | Promoter (2-3kb)   | ENSG00000006062 | 2929  |
| chr17 | 43361190 | 43361585 | 396 | Promoter (2-3kb)   | ENSG00000006062 | 2739  |
| chr17 | 43361268 | 43361627 | 360 | Promoter (2-3kb)   | ENSG00000006062 | 2697  |
| chr17 | 43364036 | 43364395 | 360 | Promoter (<=1kb)   | ENSG00000006062 | 0     |
| chr17 | 43364261 | 43364656 | 396 | Promoter (<=1kb)   | ENSG00000006062 | 0     |
| chr17 | 43364617 | 43364976 | 360 | Promoter (<=1kb)   | ENSG00000006062 | -293  |
| chr17 | 43367798 | 43368157 | 360 | Exon (ENST0000034  | ENSG00000006062 | -3474 |
| chr17 | 43367800 | 43368195 | 396 | Exon (ENST0000034  | ENSG00000006062 | -3476 |
| chr17 | 43368392 | 43368751 | 360 | Intron (ENST000003 | ENSG00000006062 | -4068 |
| chr17 | 43368432 | 43368827 | 396 | Intron (ENST000003 | ENSG00000006062 | -4108 |
| chr17 | 43368620 | 43368979 | 360 | Intron (ENST000003 | ENSG00000006062 | -4296 |
| chr17 | 43368644 | 43369039 | 396 | Intron (ENST000003 | ENSG00000006062 | -4320 |
| chr17 | 43369229 | 43369588 | 360 | Intron (ENST000003 | ENSG00000006062 | -4905 |
| chr17 | 43393932 | 43394291 | 360 | Promoter (<=1kb)   | ENSG00000006062 | 115   |
| chr17 | 43393966 | 43394361 | 396 | Promoter (<=1kb)   | ENSG00000006062 | 45    |
| chr17 | 43398914 | 43399309 | 396 | Distal Intergenic  | ENSG00000006062 | -4500 |
| chr17 | 43398939 | 43399298 | 360 | Distal Intergenic  | ENSG00000006062 | -4525 |
| chr17 | 43399229 | 43399588 | 360 | Distal Intergenic  | ENSG00000006062 | -4815 |
| chr17 | 43448832 | 43449191 | 360 | Promoter (<=1kb)   | ENSG00000267446 | 232   |
| chr17 | 43449518 | 43449877 | 360 | Promoter (<=1kb)   | ENSG00000267446 | -95   |
| chr17 | 43449595 | 43449990 | 396 | Promoter (<=1kb)   | ENSG00000267446 | -172  |
| chr17 | 43472293 | 43472688 | 396 | Promoter (1-2kb)   | ENSG00000267344 | -1610 |
| chr17 | 43476287 | 43476682 | 396 | Promoter (1-2kb)   | ENSG00000267344 | 1989  |
| chr17 | 43526110 | 43526469 | 360 | Distal Intergenic  | ENSG00000236234 | -3741 |
| chr17 | 43526803 | 43527198 | 396 | Distal Intergenic  | ENSG00000236234 | -3012 |
| chr17 | 43527281 | 43527676 | 396 | Promoter (2-3kb)   | ENSG00000236234 | -2534 |
| chr17 | 43527525 | 43527920 | 396 | Promoter (2-3kb)   | ENSG00000236234 | -2290 |
| chr17 | 43528364 | 43528723 | 360 | Promoter (1-2kb)   | ENSG00000236234 | -1487 |
| chr17 | 43528371 | 43528766 | 396 | Promoter (1-2kb)   | ENSG00000236234 | -1444 |
| chr17 | 43528572 | 43528967 | 396 | Promoter (1-2kb)   | ENSG00000236234 | -1243 |
| chr17 | 43529280 | 43529639 | 360 | Promoter (<=1kb)   | ENSG00000236234 | -571  |
| chr17 | 43529363 | 43529758 | 396 | Promoter (<=1kb)   | ENSG00000236234 | -452  |
| chr17 | 43530539 | 43530934 | 396 | Promoter (<=1kb)   | ENSG00000236234 | 329   |
| chr17 | 43530599 | 43530958 | 360 | Promoter (<=1kb)   | ENSG00000236234 | 389   |
| chr17 | 43530771 | 43531166 | 396 | Promoter (<=1kb)   | ENSG00000236234 | 561   |
| chr17 | 43530818 | 43531177 | 360 | Promoter (<=1kb)   | ENSG00000236234 | 608   |

|       |          |          |     |                     |                 |       |
|-------|----------|----------|-----|---------------------|-----------------|-------|
| chr17 | 43531337 | 43531696 | 360 | Promoter (1-2kb)    | ENSG00000236234 | 1127  |
| chr17 | 43531910 | 43532305 | 396 | Promoter (1-2kb)    | ENSG00000236234 | 1700  |
| chr17 | 43532202 | 43532597 | 396 | Promoter (1-2kb)    | ENSG00000236234 | 1992  |
| chr17 | 43576418 | 43576777 | 360 | Distal Intergenic   | ENSG00000131484 | -3849 |
| chr17 | 43576920 | 43577279 | 360 | Distal Intergenic   | ENSG00000131484 | -3347 |
| chr17 | 43580111 | 43580506 | 396 | Promoter (<=1kb)    | ENSG00000131484 | -120  |
| chr17 | 43604396 | 43604755 | 360 | Intron (ENST000002) | ENSG00000266918 | -4188 |
| chr17 | 43608765 | 43609160 | 396 | Promoter (<=1kb)    | ENSG00000266918 | 0     |
| chr17 | 43623834 | 43624229 | 396 | Promoter (<=1kb)    | ENSG00000267198 | 568   |
| chr17 | 43694503 | 43694862 | 360 | Distal Intergenic   | ENSG00000263715 | -4412 |
| chr17 | 43698577 | 43698972 | 396 | Promoter (<=1kb)    | ENSG00000263715 | -302  |
| chr17 | 43969762 | 43970157 | 396 | Promoter (2-3kb)    | ENSG00000264589 | 2722  |
| chr17 | 43970846 | 43971205 | 360 | Promoter (1-2kb)    | ENSG00000264589 | 1674  |
| chr17 | 43972313 | 43972672 | 360 | Promoter (<=1kb)    | ENSG00000264589 | 207   |
| chr17 | 43972852 | 43973247 | 396 | Promoter (<=1kb)    | ENSG00000264589 | 0     |
| chr17 | 43973770 | 43974129 | 360 | Promoter (<=1kb)    | ENSG00000264589 | -804  |
| chr17 | 43977219 | 43977578 | 360 | Distal Intergenic   | ENSG00000264589 | -4253 |
| chr17 | 43986254 | 43986613 | 360 | Promoter (1-2kb)    | ENSG00000262881 | 1532  |
| chr17 | 44107705 | 44108100 | 396 | Distal Intergenic   | ENSG00000262372 | -4579 |
| chr17 | 44107973 | 44108368 | 396 | Distal Intergenic   | ENSG00000262372 | -4311 |
| chr17 | 44108937 | 44109296 | 360 | Distal Intergenic   | ENSG00000262372 | -3383 |
| chr17 | 44109812 | 44110171 | 360 | Promoter (2-3kb)    | ENSG00000262372 | -2508 |
| chr17 | 44110013 | 44110372 | 360 | Promoter (2-3kb)    | ENSG00000262372 | -2307 |
| chr17 | 44111079 | 44111438 | 360 | Promoter (1-2kb)    | ENSG00000262372 | -1241 |
| chr17 | 44111896 | 44112255 | 360 | Promoter (<=1kb)    | ENSG00000262372 | -424  |
| chr17 | 45102028 | 45102387 | 360 | Promoter (2-3kb)    | ENSG00000262879 | -2996 |
| chr17 | 45102228 | 45102587 | 360 | Intron (ENST000005) | ENSG00000262879 | -3196 |
| chr17 | 45141504 | 45141863 | 360 | Promoter (2-3kb)    | ENSG00000262879 | 2955  |
| chr17 | 45146646 | 45147041 | 396 | Promoter (1-2kb)    | ENSG00000262879 | -1743 |
| chr17 | 45147696 | 45148091 | 396 | Promoter (2-3kb)    | ENSG00000262879 | -2793 |
| chr17 | 45148228 | 45148587 | 360 | Intron (ENST000005) | ENSG00000262879 | -3325 |
| chr17 | 45148246 | 45148641 | 396 | Intron (ENST000005) | ENSG00000262879 | -3343 |
| chr17 | 45149337 | 45149732 | 396 | Intron (ENST000005) | ENSG00000262879 | -4434 |
| chr17 | 45182399 | 45182758 | 360 | Distal Intergenic   | ENSG00000262879 | -4710 |
| chr17 | 45182606 | 45182965 | 360 | Distal Intergenic   | ENSG00000262879 | -4917 |
| chr17 | 45245231 | 45245590 | 360 | Promoter (1-2kb)    | ENSG00000261872 | -1602 |
| chr17 | 45245262 | 45245657 | 396 | Promoter (1-2kb)    | ENSG00000261872 | -1535 |
| chr17 | 45247276 | 45247671 | 396 | Promoter (<=1kb)    | ENSG00000261872 | 84    |
| chr17 | 45247475 | 45247870 | 396 | Promoter (<=1kb)    | ENSG00000261872 | 283   |
| chr17 | 45405545 | 45405904 | 360 | Distal Intergenic   | ENSG00000263293 | -4566 |
| chr17 | 45405825 | 45406184 | 360 | Distal Intergenic   | ENSG00000263293 | -4846 |
| chr17 | 45713623 | 45714018 | 396 | Promoter (<=1kb)    | ENSG00000263766 | 0     |
| chr17 | 45730405 | 45730764 | 360 | Distal Intergenic   | ENSG00000263766 | -3619 |
| chr17 | 45935637 | 45936032 | 396 | Distal Intergenic   | ENSG00000264243 | -4676 |
| chr17 | 46008143 | 46008538 | 396 | Promoter (1-2kb)    | ENSG00000266601 | 1934  |
| chr17 | 46008622 | 46008981 | 360 | Promoter (1-2kb)    | ENSG00000266601 | 1491  |
| chr17 | 46011915 | 46012274 | 360 | Promoter (1-2kb)    | ENSG00000266601 | -1443 |
| chr17 | 46013760 | 46014119 | 360 | Intron (ENST000004) | ENSG00000266601 | -3288 |
| chr17 | 46013989 | 46014348 | 360 | Intron (ENST000004) | ENSG00000266601 | -3517 |
| chr17 | 46016776 | 46017171 | 396 | Promoter (1-2kb)    | ENSG00000234494 | 1554  |
| chr17 | 46016981 | 46017376 | 396 | Promoter (1-2kb)    | ENSG00000234494 | 1349  |
| chr17 | 46019721 | 46020116 | 396 | Promoter (<=1kb)    | ENSG00000234494 | -945  |
| chr17 | 46029081 | 46029476 | 396 | Intron (ENST000005) | ENSG00000264019 | -3440 |
| chr17 | 46072078 | 46072473 | 396 | Promoter (1-2kb)    | ENSG00000264701 | 1089  |
| chr17 | 46075829 | 46076224 | 396 | Promoter (2-3kb)    | ENSG00000264701 | -2267 |
| chr17 | 46076029 | 46076424 | 396 | Promoter (2-3kb)    | ENSG00000264701 | -2467 |
| chr17 | 46123305 | 46123664 | 360 | Promoter (1-2kb)    | ENSG00000263412 | 1748  |
| chr17 | 46125945 | 46126340 | 396 | Promoter (<=1kb)    | ENSG00000263412 | -510  |

|       |          |          |     |                   |                 |       |
|-------|----------|----------|-----|-------------------|-----------------|-------|
| chr17 | 46135173 | 46135568 | 396 | Promoter (2-3kb)  | ENSG00000266341 | 2463  |
| chr17 | 46138354 | 46138749 | 396 | Promoter (<=1kb)  | ENSG00000266341 | -323  |
| chr17 | 46141202 | 46141597 | 396 | Distal Intergenic | ENSG00000266341 | -3171 |
| chr17 | 46264639 | 46264998 | 360 | Promoter (1-2kb)  | ENSG00000263787 | 1339  |
| chr17 | 46264844 | 46265203 | 360 | Promoter (1-2kb)  | ENSG00000263787 | 1544  |
| chr17 | 46265760 | 46266119 | 360 | Promoter (2-3kb)  | ENSG00000263787 | 2460  |
| chr17 | 46708134 | 46708529 | 396 | Promoter (1-2kb)  | ENSG00000242207 | 1223  |
| chr17 | 46708353 | 46708748 | 396 | Promoter (1-2kb)  | ENSG00000242207 | 1442  |
| chr17 | 46719393 | 46719788 | 396 | Promoter (2-3kb)  | ENSG00000272763 | -2746 |
| chr17 | 46782361 | 46782756 | 396 | Promoter (<=1kb)  | ENSG00000244649 | 0     |
| chr17 | 46783214 | 46783573 | 360 | Promoter (<=1kb)  | ENSG00000244649 | 649   |
| chr17 | 46783420 | 46783779 | 360 | Promoter (<=1kb)  | ENSG00000244649 | 855   |
| chr17 | 46795448 | 46795843 | 396 | Distal Intergenic | ENSG00000229637 | -4687 |
| chr17 | 47248687 | 47249082 | 396 | Promoter (<=1kb)  | ENSG00000262973 | -175  |
| chr17 | 47323701 | 47324096 | 396 | Promoter (1-2kb)  | ENSG00000177369 | -1505 |
| chr17 | 47325317 | 47325676 | 360 | Promoter (<=1kb)  | ENSG00000177369 | 0     |
| chr17 | 47538403 | 47538762 | 360 | Promoter (<=1kb)  | ENSG00000249497 | 349   |
| chr17 | 47649068 | 47649463 | 396 | Promoter (1-2kb)  | ENSG00000249906 | 1963  |
| chr17 | 47649401 | 47649760 | 360 | Promoter (1-2kb)  | ENSG00000249906 | 1666  |
| chr17 | 47649697 | 47650092 | 396 | Promoter (1-2kb)  | ENSG00000249906 | 1334  |
| chr17 | 47650840 | 47651199 | 360 | Promoter (<=1kb)  | ENSG00000249906 | 227   |
| chr17 | 47651304 | 47651699 | 396 | Promoter (<=1kb)  | ENSG00000249906 | 0     |
| chr17 | 47654672 | 47655031 | 360 | Promoter (<=1kb)  | ENSG00000250310 | 293   |
| chr17 | 47654696 | 47655091 | 396 | Promoter (<=1kb)  | ENSG00000250310 | 233   |
| chr17 | 47654919 | 47655314 | 396 | Promoter (<=1kb)  | ENSG00000250310 | 10    |
| chr17 | 47907319 | 47907678 | 360 | Distal Intergenic | ENSG00000262837 | -3923 |
| chr17 | 47920294 | 47920689 | 396 | Promoter (2-3kb)  | ENSG00000204584 | -2583 |
| chr17 | 48073733 | 48074128 | 396 | Promoter (<=1kb)  | ENSG00000248172 | -125  |
| chr17 | 48073990 | 48074349 | 360 | Promoter (<=1kb)  | ENSG00000248172 | 0     |
| chr17 | 48181643 | 48182002 | 360 | Promoter (2-3kb)  | ENSG00000250282 | -2359 |
| chr17 | 48211271 | 48211630 | 360 | Promoter (1-2kb)  | ENSG00000236472 | -1321 |
| chr17 | 48211542 | 48211901 | 360 | Promoter (1-2kb)  | ENSG00000236472 | -1050 |
| chr17 | 48235682 | 48236041 | 360 | Promoter (2-3kb)  | ENSG00000253730 | 2596  |
| chr17 | 48589977 | 48590372 | 396 | Distal Intergenic | ENSG00000249451 | -4288 |
| chr17 | 48618546 | 48618941 | 396 | Promoter (2-3kb)  | ENSG00000250286 | -2431 |
| chr17 | 48636463 | 48636858 | 396 | Promoter (<=1kb)  | ENSG00000250107 | 0     |
| chr17 | 48713134 | 48713493 | 360 | Distal Intergenic | ENSG00000251239 | -3833 |
| chr17 | 48923729 | 48924088 | 360 | Distal Intergenic | ENSG00000261976 | -4742 |
| chr17 | 48923822 | 48924217 | 396 | Distal Intergenic | ENSG00000261976 | -4835 |
| chr17 | 48942811 | 48943206 | 396 | Promoter (<=1kb)  | ENSG00000229980 | -834  |
| chr17 | 48943957 | 48944352 | 396 | Promoter (<=1kb)  | ENSG00000229980 | 0     |
| chr17 | 48944730 | 48945125 | 396 | Promoter (<=1kb)  | ENSG00000229980 | 221   |
| chr17 | 48944847 | 48945206 | 360 | Promoter (<=1kb)  | ENSG00000229980 | 338   |
| chr17 | 48944931 | 48945326 | 396 | Promoter (<=1kb)  | ENSG00000229980 | 422   |
| chr17 | 48983592 | 48983987 | 396 | Promoter (2-3kb)  | ENSG00000229980 | -2052 |
| chr17 | 48983598 | 48983957 | 360 | Promoter (2-3kb)  | ENSG00000229980 | -2082 |
| chr17 | 48983803 | 48984198 | 396 | Promoter (1-2kb)  | ENSG00000229980 | -1841 |
| chr17 | 48983845 | 48984204 | 360 | Promoter (1-2kb)  | ENSG00000229980 | -1835 |
| chr17 | 48984443 | 48984802 | 360 | Promoter (1-2kb)  | ENSG00000229980 | -1237 |
| chr17 | 48984465 | 48984860 | 396 | Promoter (1-2kb)  | ENSG00000229980 | -1179 |
| chr17 | 49026924 | 49027283 | 360 | Distal Intergenic | ENSG00000247011 | -4850 |
| chr17 | 49410305 | 49410664 | 360 | Promoter (<=1kb)  | ENSG00000249982 | 265   |
| chr17 | 49410816 | 49411211 | 396 | Promoter (<=1kb)  | ENSG00000249982 | 776   |
| chr17 | 49414168 | 49414527 | 360 | Promoter (<=1kb)  | ENSG00000225860 | 92    |
| chr17 | 49414624 | 49414983 | 360 | Promoter (<=1kb)  | ENSG00000225860 | 548   |
| chr17 | 49414850 | 49415245 | 396 | Promoter (<=1kb)  | ENSG00000225860 | 774   |
| chr17 | 49414863 | 49415222 | 360 | Promoter (<=1kb)  | ENSG00000225860 | 787   |
| chr17 | 49415099 | 49415494 | 396 | Promoter (1-2kb)  | ENSG00000225860 | 1023  |

|       |          |          |     |                     |                 |       |
|-------|----------|----------|-----|---------------------|-----------------|-------|
| chr17 | 53588246 | 53588641 | 396 | Promoter (<=1kb)    | ENSG00000261873 | 0     |
| chr17 | 54947360 | 54947755 | 396 | Promoter (1-2kb)    | ENSG00000262951 | 1052  |
| chr17 | 54948690 | 54949049 | 360 | Promoter (2-3kb)    | ENSG00000262951 | 2382  |
| chr17 | 54967772 | 54968167 | 396 | Promoter (1-2kb)    | ENSG00000262112 | 1531  |
| chr17 | 54968194 | 54968553 | 360 | Promoter (1-2kb)    | ENSG00000262112 | 1953  |
| chr17 | 54968231 | 54968626 | 396 | Promoter (1-2kb)    | ENSG00000262112 | 1990  |
| chr17 | 54968406 | 54968765 | 360 | Promoter (2-3kb)    | ENSG00000262112 | 2165  |
| chr17 | 54968878 | 54969237 | 360 | Promoter (2-3kb)    | ENSG00000262112 | 2637  |
| chr17 | 55013552 | 55013911 | 360 | Distal Intergenic   | ENSG00000262298 | -3382 |
| chr17 | 55055197 | 55055592 | 396 | Distal Intergenic   | ENSG00000263120 | -4518 |
| chr17 | 55061048 | 55061407 | 360 | Promoter (<=1kb)    | ENSG00000263120 | 938   |
| chr17 | 55165702 | 55166061 | 360 | Distal Intergenic   | ENSG00000263004 | -3317 |
| chr17 | 55601593 | 55601952 | 360 | Promoter (<=1kb)    | ENSG00000266100 | -635  |
| chr17 | 55912304 | 55912663 | 360 | Promoter (<=1kb)    | ENSG00000265542 | -194  |
| chr17 | 57045130 | 57045489 | 360 | Promoter (1-2kb)    | ENSG00000263938 | 1817  |
| chr17 | 57182034 | 57182393 | 360 | Promoter (1-2kb)    | ENSG00000224738 | -1566 |
| chr17 | 57479409 | 57479768 | 360 | Promoter (<=1kb)    | ENSG00000266002 | 896   |
| chr17 | 57481625 | 57481984 | 360 | Promoter (<=1kb)    | ENSG00000266002 | -961  |
| chr17 | 57603406 | 57603801 | 396 | Promoter (<=1kb)    | ENSG00000265313 | 399   |
| chr17 | 57603422 | 57603781 | 360 | Promoter (<=1kb)    | ENSG00000265313 | 419   |
| chr17 | 57607794 | 57608189 | 396 | Distal Intergenic   | ENSG00000265313 | -3487 |
| chr17 | 57608013 | 57608408 | 396 | Distal Intergenic   | ENSG00000265313 | -3706 |
| chr17 | 57859911 | 57860270 | 360 | Promoter (1-2kb)    | ENSG00000267637 | -1904 |
| chr17 | 57860096 | 57860491 | 396 | Promoter (1-2kb)    | ENSG00000267637 | -1683 |
| chr17 | 57860315 | 57860710 | 396 | Promoter (1-2kb)    | ENSG00000267637 | -1464 |
| chr17 | 57860589 | 57860948 | 360 | Promoter (1-2kb)    | ENSG00000267637 | -1226 |
| chr17 | 57861250 | 57861645 | 396 | Promoter (<=1kb)    | ENSG00000267637 | -529  |
| chr17 | 57861954 | 57862313 | 360 | Promoter (<=1kb)    | ENSG00000267637 | 0     |
| chr17 | 57862151 | 57862546 | 396 | Promoter (<=1kb)    | ENSG00000267637 | 0     |
| chr17 | 57862161 | 57862520 | 360 | Promoter (<=1kb)    | ENSG00000267637 | 0     |
| chr17 | 57862942 | 57863337 | 396 | Promoter (<=1kb)    | ENSG00000267637 | 768   |
| chr17 | 57862960 | 57863319 | 360 | Promoter (<=1kb)    | ENSG00000267637 | 786   |
| chr17 | 57863162 | 57863557 | 396 | Promoter (<=1kb)    | ENSG00000267637 | 988   |
| chr17 | 58041500 | 58041895 | 396 | Promoter (<=1kb)    | ENSG00000267302 | -298  |
| chr17 | 58156617 | 58157012 | 396 | Promoter (<=1kb)    | ENSG00000267416 | 0     |
| chr17 | 58156941 | 58157336 | 396 | Promoter (<=1kb)    | ENSG00000267416 | 271   |
| chr17 | 58219035 | 58219394 | 360 | Promoter (1-2kb)    | ENSG00000267095 | -1593 |
| chr17 | 58219277 | 58219672 | 396 | Promoter (1-2kb)    | ENSG00000267095 | -1835 |
| chr17 | 58219511 | 58219906 | 396 | Promoter (2-3kb)    | ENSG00000267095 | -2069 |
| chr17 | 58219532 | 58219891 | 360 | Promoter (2-3kb)    | ENSG00000267095 | -2090 |
| chr17 | 59211091 | 59211486 | 396 | Promoter (1-2kb)    | ENSG00000267667 | 1839  |
| chr17 | 59462015 | 59462374 | 360 | Promoter (1-2kb)    | ENSG00000266934 | 1253  |
| chr17 | 59469756 | 59470115 | 360 | Promoter (1-2kb)    | ENSG00000267280 | 1308  |
| chr17 | 59469812 | 59470207 | 396 | Promoter (1-2kb)    | ENSG00000267280 | 1216  |
| chr17 | 59476214 | 59476573 | 360 | Promoter (<=1kb)    | ENSG00000267280 | 158   |
| chr17 | 59487324 | 59487683 | 360 | Promoter (1-2kb)    | ENSG00000267280 | 1233  |
| chr17 | 60625458 | 60625817 | 360 | Promoter (1-2kb)    | ENSG00000264546 | -1270 |
| chr17 | 60626531 | 60626890 | 360 | Promoter (<=1kb)    | ENSG00000264546 | -197  |
| chr17 | 61276079 | 61276474 | 396 | Promoter (<=1kb)    | ENSG00000233635 | -933  |
| chr17 | 61279903 | 61280262 | 360 | Intron (ENST000005; | ENSG00000233635 | -4757 |
| chr17 | 61388936 | 61389331 | 396 | Promoter (1-2kb)    | ENSG00000263501 | 1551  |
| chr17 | 61388989 | 61389348 | 360 | Promoter (1-2kb)    | ENSG00000263501 | 1534  |
| chr17 | 61389940 | 61390335 | 396 | Promoter (<=1kb)    | ENSG00000263501 | 547   |
| chr17 | 61393997 | 61394392 | 396 | Intron (ENST000005; | ENSG00000263501 | -3115 |
| chr17 | 61394530 | 61394925 | 396 | Intron (ENST000005; | ENSG00000263501 | -3648 |
| chr17 | 61413257 | 61413652 | 396 | Promoter (2-3kb)    | ENSG00000233635 | 2762  |
| chr17 | 61413522 | 61413917 | 396 | Promoter (2-3kb)    | ENSG00000233635 | 2497  |
| chr17 | 61414573 | 61414932 | 360 | Promoter (1-2kb)    | ENSG00000233635 | 1482  |

|       |          |          |     |                    |                 |       |
|-------|----------|----------|-----|--------------------|-----------------|-------|
| chr17 | 61417160 | 61417519 | 360 | Promoter (<=1kb)   | ENSG00000233635 | -746  |
| chr17 | 61493921 | 61494280 | 360 | Promoter (2-3kb)   | ENSG00000226797 | -2248 |
| chr17 | 61494634 | 61494993 | 360 | Promoter (2-3kb)   | ENSG00000226797 | -2961 |
| chr17 | 61507687 | 61508046 | 360 | Promoter (<=1kb)   | ENSG00000263644 | 404   |
| chr17 | 61532628 | 61533023 | 396 | Promoter (<=1kb)   | ENSG00000265971 | 274   |
| chr17 | 62063541 | 62063936 | 396 | Promoter (2-3kb)   | ENSG00000263489 | 2846  |
| chr17 | 62064811 | 62065206 | 396 | Promoter (1-2kb)   | ENSG00000263489 | 1576  |
| chr17 | 62065010 | 62065405 | 396 | Promoter (1-2kb)   | ENSG00000263489 | 1377  |
| chr17 | 62071336 | 62071695 | 360 | Downstream (1-2kb) | ENSG00000263489 | -4554 |
| chr17 | 62891337 | 62891696 | 360 | Promoter (2-3kb)   | ENSG00000265218 | 2395  |
| chr17 | 64410830 | 64411189 | 360 | Promoter (<=1kb)   | ENSG00000264630 | 0     |
| chr17 | 64671558 | 64671917 | 360 | Promoter (<=1kb)   | ENSG00000229330 | -573  |
| chr17 | 65033431 | 65033826 | 396 | Distal Intergenic  | ENSG00000265664 | -4025 |
| chr17 | 65239276 | 65239671 | 396 | Promoter (1-2kb)   | ENSG00000266473 | -1282 |
| chr17 | 65239558 | 65239953 | 396 | Promoter (<=1kb)   | ENSG00000266473 | -1000 |
| chr17 | 65517142 | 65517501 | 360 | Distal Intergenic  | ENSG00000264754 | -3096 |
| chr17 | 65995389 | 65995784 | 396 | Promoter (2-3kb)   | ENSG00000266176 | -2842 |
| chr17 | 65997066 | 65997461 | 396 | Distal Intergenic  | ENSG00000266176 | -4519 |
| chr17 | 66099399 | 66099758 | 360 | Promoter (1-2kb)   | ENSG00000265055 | -1784 |
| chr17 | 66188673 | 66189068 | 396 | Promoter (2-3kb)   | ENSG00000267731 | 2648  |
| chr17 | 66242001 | 66242396 | 396 | Promoter (1-2kb)   | ENSG00000265100 | 1683  |
| chr17 | 66246639 | 66246998 | 360 | Promoter (2-3kb)   | ENSG00000265100 | -2560 |
| chr17 | 66409802 | 66410197 | 396 | Promoter (<=1kb)   | ENSG00000267009 | 0     |
| chr17 | 66410068 | 66410463 | 396 | Promoter (<=1kb)   | ENSG00000267009 | 187   |
| chr17 | 66549756 | 66550115 | 360 | Distal Intergenic  | ENSG00000267461 | -3542 |
| chr17 | 66583668 | 66584063 | 396 | Distal Intergenic  | ENSG00000267659 | -3874 |
| chr17 | 66586798 | 66587193 | 396 | Promoter (<=1kb)   | ENSG00000267659 | -744  |
| chr17 | 66625436 | 66625795 | 360 | Promoter (1-2kb)   | ENSG00000267659 | 1141  |
| chr17 | 66792367 | 66792726 | 360 | Promoter (1-2kb)   | ENSG00000267250 | 1237  |
| chr17 | 66793666 | 66794061 | 396 | Promoter (<=1kb)   | ENSG00000267250 | 0     |
| chr17 | 66796319 | 66796678 | 360 | Promoter (2-3kb)   | ENSG00000267250 | -2356 |
| chr17 | 67546520 | 67546915 | 396 | Promoter (<=1kb)   | ENSG00000267194 | -584  |
| chr17 | 67548422 | 67548817 | 396 | Promoter (<=1kb)   | ENSG00000267194 | 923   |
| chr17 | 67760931 | 67761290 | 360 | Promoter (1-2kb)   | ENSG00000227517 | 1113  |
| chr17 | 67958735 | 67959094 | 360 | Promoter (<=1kb)   | ENSG00000237560 | 832   |
| chr17 | 68044327 | 68044722 | 396 | Promoter (2-3kb)   | ENSG00000267603 | -2696 |
| chr17 | 68044602 | 68044997 | 396 | Promoter (2-3kb)   | ENSG00000267603 | -2421 |
| chr17 | 68046142 | 68046537 | 396 | Promoter (<=1kb)   | ENSG00000267603 | -881  |
| chr17 | 68127826 | 68128185 | 360 | Promoter (2-3kb)   | ENSG00000230258 | -2826 |
| chr17 | 68128068 | 68128427 | 360 | Distal Intergenic  | ENSG00000230258 | -3068 |
| chr17 | 68164466 | 68164861 | 396 | Promoter (<=1kb)   | ENSG00000267365 | 682   |
| chr17 | 68168431 | 68168826 | 396 | Promoter (2-3kb)   | ENSG00000267365 | -2888 |
| chr17 | 68168461 | 68168820 | 360 | Promoter (2-3kb)   | ENSG00000267365 | -2918 |
| chr17 | 68169578 | 68169937 | 360 | Distal Intergenic  | ENSG00000267365 | -4035 |
| chr17 | 68170249 | 68170608 | 360 | Distal Intergenic  | ENSG00000267365 | -4706 |
| chr17 | 68170528 | 68170887 | 360 | Distal Intergenic  | ENSG00000267365 | -4985 |
| chr17 | 68774433 | 68774792 | 360 | Promoter (<=1kb)   | ENSG00000271239 | 579   |
| chr17 | 68774533 | 68774928 | 396 | Promoter (<=1kb)   | ENSG00000271239 | 443   |
| chr17 | 68774737 | 68775096 | 360 | Promoter (<=1kb)   | ENSG00000271239 | 275   |
| chr17 | 68774757 | 68775152 | 396 | Promoter (<=1kb)   | ENSG00000271239 | 219   |
| chr17 | 68776426 | 68776821 | 396 | Promoter (1-2kb)   | ENSG00000271239 | -1055 |
| chr17 | 68776438 | 68776797 | 360 | Promoter (1-2kb)   | ENSG00000271239 | -1067 |
| chr17 | 68777621 | 68777980 | 360 | Promoter (2-3kb)   | ENSG00000271239 | -2250 |
| chr17 | 68778105 | 68778500 | 396 | Promoter (2-3kb)   | ENSG00000271239 | -2734 |
| chr17 | 69198407 | 69198766 | 360 | Promoter (<=1kb)   | ENSG00000260785 | -89   |
| chr17 | 70106725 | 70107084 | 360 | Promoter (<=1kb)   | ENSG00000234899 | 0     |
| chr17 | 70116752 | 70117111 | 360 | Promoter (<=1kb)   | ENSG00000234899 | 0     |
| chr17 | 70117843 | 70118202 | 360 | Promoter (<=1kb)   | ENSG00000234899 | -909  |

|       |          |          |     |                      |                 |       |
|-------|----------|----------|-----|----------------------|-----------------|-------|
| chr17 | 70636638 | 70637033 | 396 | Promoter (<=1kb)     | ENSG00000227036 | -27   |
| chr17 | 71511168 | 71511563 | 396 | Promoter (1-2kb)     | ENSG00000264985 | 1344  |
| chr17 | 71664253 | 71664612 | 360 | Distal Intergenic    | ENSG00000265935 | -4266 |
| chr17 | 71769649 | 71770008 | 360 | Promoter (2-3kb)     | ENSG00000177338 | 2888  |
| chr17 | 72113399 | 72113758 | 360 | Intron (ENST000005:) | ENSG00000266357 | -4361 |
| chr17 | 72591123 | 72591482 | 360 | Distal Intergenic    | ENSG00000261222 | -4497 |
| chr17 | 72591926 | 72592285 | 360 | Distal Intergenic    | ENSG00000261222 | -3694 |
| chr17 | 72592502 | 72592897 | 396 | Distal Intergenic    | ENSG00000261222 | -3082 |
| chr17 | 72592758 | 72593153 | 396 | Promoter (2-3kb)     | ENSG00000261222 | -2826 |
| chr17 | 72592820 | 72593179 | 360 | Promoter (2-3kb)     | ENSG00000261222 | -2800 |
| chr17 | 72593047 | 72593406 | 360 | Promoter (2-3kb)     | ENSG00000261222 | -2573 |
| chr17 | 72593047 | 72593442 | 396 | Promoter (2-3kb)     | ENSG00000261222 | -2537 |
| chr17 | 72602114 | 72602473 | 360 | Promoter (<=1kb)     | ENSG00000261222 | -173  |
| chr17 | 72604043 | 72604438 | 396 | Promoter (1-2kb)     | ENSG00000261222 | 1397  |
| chr17 | 72968132 | 72968491 | 360 | Promoter (1-2kb)     | ENSG00000263586 | 1333  |
| chr17 | 72968813 | 72969172 | 360 | Promoter (2-3kb)     | ENSG00000263586 | 2014  |
| chr17 | 72968924 | 72969319 | 396 | Promoter (2-3kb)     | ENSG00000263586 | 2125  |
| chr17 | 73164273 | 73164632 | 360 | Promoter (<=1kb)     | ENSG00000265242 | -929  |
| chr17 | 73164327 | 73164722 | 396 | Promoter (<=1kb)     | ENSG00000265242 | -983  |
| chr17 | 73166545 | 73166940 | 396 | Distal Intergenic    | ENSG00000265242 | -3201 |
| chr17 | 73167167 | 73167562 | 396 | Distal Intergenic    | ENSG00000265242 | -3823 |
| chr17 | 73262094 | 73262453 | 360 | Distal Intergenic    | ENSG00000263843 | -4997 |
| chr17 | 73262166 | 73262561 | 396 | Distal Intergenic    | ENSG00000263843 | -4889 |
| chr17 | 73262517 | 73262876 | 360 | Distal Intergenic    | ENSG00000263843 | -4574 |
| chr17 | 73262774 | 73263133 | 360 | Distal Intergenic    | ENSG00000263843 | -4317 |
| chr17 | 73343063 | 73343458 | 396 | Promoter (2-3kb)     | ENSG00000265987 | 2577  |
| chr17 | 73369611 | 73369970 | 360 | Promoter (<=1kb)     | ENSG00000264853 | 0     |
| chr17 | 73370606 | 73370965 | 360 | Promoter (<=1kb)     | ENSG00000264853 | -789  |
| chr17 | 73676188 | 73676547 | 360 | Promoter (<=1kb)     | ENSG00000264829 | -141  |
| chr17 | 73812794 | 73813189 | 396 | Promoter (2-3kb)     | ENSG00000266980 | 2947  |
| chr17 | 73812997 | 73813392 | 396 | Promoter (2-3kb)     | ENSG00000266980 | 2744  |
| chr17 | 73867738 | 73868097 | 360 | Distal Intergenic    | ENSG00000267801 | -4356 |
| chr17 | 73975614 | 73975973 | 360 | Promoter (<=1kb)     | ENSG00000261408 | 273   |
| chr17 | 74664099 | 74664494 | 396 | Distal Intergenic    | ENSG00000261335 | -3530 |
| chr17 | 74854779 | 74855138 | 360 | Promoter (2-3kb)     | ENSG00000267535 | 2528  |
| chr17 | 74949983 | 74950378 | 396 | Promoter (<=1kb)     | ENSG00000267568 | -191  |
| chr17 | 74961857 | 74962252 | 396 | Promoter (2-3kb)     | ENSG00000267568 | 2927  |
| chr17 | 74965006 | 74965365 | 360 | Promoter (<=1kb)     | ENSG00000267568 | 0     |
| chr17 | 74966238 | 74966597 | 360 | Promoter (<=1kb)     | ENSG00000267568 | -1000 |
| chr17 | 74967389 | 74967748 | 360 | Promoter (2-3kb)     | ENSG00000267568 | -2151 |
| chr17 | 74969289 | 74969648 | 360 | Distal Intergenic    | ENSG00000267568 | -4051 |
| chr17 | 74969496 | 74969855 | 360 | Distal Intergenic    | ENSG00000267568 | -4258 |
| chr17 | 75077467 | 75077826 | 360 | Distal Intergenic    | ENSG00000234912 | -4972 |
| chr17 | 75079559 | 75079918 | 360 | Promoter (2-3kb)     | ENSG00000234912 | -2880 |
| chr17 | 75079729 | 75080124 | 396 | Promoter (2-3kb)     | ENSG00000234912 | -2674 |
| chr17 | 75079781 | 75080140 | 360 | Promoter (2-3kb)     | ENSG00000234912 | -2658 |
| chr17 | 75084043 | 75084402 | 360 | Promoter (<=1kb)     | ENSG00000234912 | -353  |
| chr17 | 75084175 | 75084570 | 396 | Promoter (<=1kb)     | ENSG00000234912 | -185  |
| chr17 | 75084318 | 75084677 | 360 | Promoter (<=1kb)     | ENSG00000234912 | -78   |
| chr17 | 75084574 | 75084933 | 360 | Promoter (<=1kb)     | ENSG00000234912 | 0     |
| chr17 | 75085663 | 75086022 | 360 | Promoter (<=1kb)     | ENSG00000234912 | 274   |
| chr17 | 75085709 | 75086104 | 396 | Promoter (<=1kb)     | ENSG00000234912 | 320   |
| chr17 | 75087050 | 75087409 | 360 | Promoter (1-2kb)     | ENSG00000234912 | 1661  |
| chr17 | 75261056 | 75261451 | 396 | Promoter (<=1kb)     | ENSG00000265121 | -198  |
| chr17 | 75261473 | 75261832 | 360 | Promoter (<=1kb)     | ENSG00000265121 | -615  |
| chr17 | 75262350 | 75262709 | 360 | Promoter (1-2kb)     | ENSG00000265121 | -1492 |
| chr17 | 75262555 | 75262950 | 396 | Promoter (1-2kb)     | ENSG00000265121 | -1697 |
| chr17 | 75262571 | 75262930 | 360 | Promoter (1-2kb)     | ENSG00000265121 | -1713 |

|       |          |          |     |                     |                 |       |
|-------|----------|----------|-----|---------------------|-----------------|-------|
| chr17 | 75270294 | 75270689 | 396 | Promoter (<=1kb)    | ENSG00000263718 | 0     |
| chr17 | 75270520 | 75270915 | 396 | Promoter (<=1kb)    | ENSG00000263718 | -112  |
| chr17 | 75271312 | 75271707 | 396 | Promoter (<=1kb)    | ENSG00000263718 | -904  |
| chr17 | 75271416 | 75271775 | 360 | Promoter (1-2kb)    | ENSG00000263718 | -1008 |
| chr17 | 75271985 | 75272344 | 360 | Promoter (1-2kb)    | ENSG00000263718 | -1577 |
| chr17 | 75460274 | 75460633 | 360 | Distal Intergenic   | ENSG00000267263 | -4517 |
| chr17 | 75468250 | 75468645 | 396 | Promoter (<=1kb)    | ENSG00000267016 | 207   |
| chr17 | 75468438 | 75468797 | 360 | Promoter (<=1kb)    | ENSG00000267016 | 55    |
| chr17 | 75519860 | 75520219 | 360 | Promoter (2-3kb)    | ENSG00000267665 | -2861 |
| chr17 | 75524936 | 75525331 | 396 | Promoter (<=1kb)    | ENSG00000267665 | 0     |
| chr17 | 75525185 | 75525580 | 396 | Promoter (<=1kb)    | ENSG00000267665 | 54    |
| chr17 | 75525209 | 75525568 | 360 | Promoter (<=1kb)    | ENSG00000267665 | 78    |
| chr17 | 75526086 | 75526481 | 396 | Promoter (<=1kb)    | ENSG00000267665 | 955   |
| chr17 | 75526289 | 75526684 | 396 | Promoter (1-2kb)    | ENSG00000267665 | 1158  |
| chr17 | 75527274 | 75527633 | 360 | Promoter (2-3kb)    | ENSG00000267665 | 2143  |
| chr17 | 75548977 | 75549336 | 360 | Intron (ENST000005) | ENSG00000267506 | -4888 |
| chr17 | 75549429 | 75549824 | 396 | Intron (ENST000005) | ENSG00000267506 | -4400 |
| chr17 | 75552654 | 75553013 | 360 | Promoter (1-2kb)    | ENSG00000267506 | -1211 |
| chr17 | 75554497 | 75554892 | 396 | Promoter (<=1kb)    | ENSG00000267506 | 273   |
| chr17 | 75556703 | 75557098 | 396 | Promoter (2-3kb)    | ENSG00000267506 | 2479  |
| chr17 | 75556743 | 75557102 | 360 | Promoter (2-3kb)    | ENSG00000267506 | 2519  |
| chr17 | 75557049 | 75557408 | 360 | Promoter (2-3kb)    | ENSG00000267506 | 2825  |
| chr17 | 75565800 | 75566159 | 360 | Promoter (1-2kb)    | ENSG00000267466 | -1023 |
| chr17 | 75723728 | 75724087 | 360 | Promoter (<=1kb)    | ENSG00000267790 | 554   |
| chr17 | 76103058 | 76103417 | 360 | Promoter (2-3kb)    | ENSG00000204282 | 2999  |
| chr17 | 76104493 | 76104852 | 360 | Promoter (1-2kb)    | ENSG00000204282 | 1564  |
| chr17 | 76105204 | 76105599 | 396 | Promoter (<=1kb)    | ENSG00000204282 | 817   |
| chr17 | 76278002 | 76278361 | 360 | Distal Intergenic   | ENSG00000204277 | -3429 |
| chr17 | 76279508 | 76279867 | 360 | Distal Intergenic   | ENSG00000204277 | -4935 |
| chr17 | 76340123 | 76340482 | 360 | Promoter (1-2kb)    | ENSG00000267737 | 1305  |
| chr17 | 76341522 | 76341881 | 360 | Promoter (2-3kb)    | ENSG00000267737 | 2704  |
| chr17 | 76351658 | 76352053 | 396 | Distal Intergenic   | ENSG00000266970 | -4481 |
| chr17 | 76351663 | 76352022 | 360 | Distal Intergenic   | ENSG00000266970 | -4512 |
| chr17 | 76352148 | 76352507 | 360 | Distal Intergenic   | ENSG00000266970 | -4027 |
| chr17 | 76352397 | 76352756 | 360 | Distal Intergenic   | ENSG00000266970 | -3778 |
| chr17 | 76352551 | 76352946 | 396 | Distal Intergenic   | ENSG00000266970 | -3588 |
| chr17 | 76353842 | 76354201 | 360 | Promoter (2-3kb)    | ENSG00000266970 | -2333 |
| chr17 | 76353851 | 76354246 | 396 | Promoter (2-3kb)    | ENSG00000266970 | -2288 |
| chr17 | 76357061 | 76357456 | 396 | Promoter (<=1kb)    | ENSG00000266970 | 527   |
| chr17 | 76359397 | 76359792 | 396 | Promoter (<=1kb)    | ENSG00000266970 | 645   |
| chr17 | 76361740 | 76362099 | 360 | Promoter (2-3kb)    | ENSG00000266970 | 2988  |
| chr17 | 76479294 | 76479689 | 396 | Promoter (1-2kb)    | ENSG00000267432 | -1275 |
| chr17 | 76489564 | 76489959 | 396 | Promoter (<=1kb)    | ENSG00000267432 | 327   |
| chr17 | 76489869 | 76490264 | 396 | Promoter (<=1kb)    | ENSG00000267432 | 632   |
| chr17 | 76849684 | 76850079 | 396 | Promoter (1-2kb)    | ENSG00000267601 | -1481 |
| chr17 | 77129226 | 77129585 | 360 | Promoter (<=1kb)    | ENSG00000266711 | 422   |
| chr17 | 77131529 | 77131924 | 396 | Promoter (2-3kb)    | ENSG00000266711 | 2725  |
| chr17 | 77677470 | 77677865 | 396 | Distal Intergenic   | ENSG00000214105 | -3210 |
| chr17 | 77677778 | 77678173 | 396 | Promoter (2-3kb)    | ENSG00000214105 | -2902 |
| chr17 | 77821125 | 77821520 | 396 | Promoter (2-3kb)    | ENSG00000262343 | 2389  |
| chr17 | 77965977 | 77966372 | 396 | Promoter (<=1kb)    | ENSG00000262172 | 268   |
| chr17 | 77966221 | 77966616 | 396 | Promoter (<=1kb)    | ENSG00000262172 | 24    |
| chr17 | 77969341 | 77969736 | 396 | Promoter (2-3kb)    | ENSG00000262172 | -2701 |
| chr17 | 77970067 | 77970462 | 396 | Distal Intergenic   | ENSG00000262172 | -3427 |
| chr17 | 78288280 | 78288639 | 360 | Promoter (<=1kb)    | ENSG00000262979 | -812  |
| chr17 | 78779835 | 78780230 | 396 | Promoter (<=1kb)    | ENSG00000262833 | -403  |
| chr17 | 78780129 | 78780524 | 396 | Promoter (<=1kb)    | ENSG00000262833 | -697  |
| chr17 | 78780330 | 78780725 | 396 | Promoter (<=1kb)    | ENSG00000262833 | -898  |



|       |          |          |     |                   |                 |       |
|-------|----------|----------|-----|-------------------|-----------------|-------|
| chr17 | 78780406 | 78780765 | 360 | Promoter (<=1kb)  | ENSG00000262833 | -974  |
| chr17 | 78782467 | 78782826 | 360 | Distal Intergenic | ENSG00000262833 | -3035 |
| chr17 | 78782584 | 78782979 | 396 | Distal Intergenic | ENSG00000262833 | -3152 |
| chr17 | 78782755 | 78783114 | 360 | Distal Intergenic | ENSG00000262833 | -3323 |
| chr17 | 78782810 | 78783205 | 396 | Distal Intergenic | ENSG00000262833 | -3378 |
| chr17 | 78783032 | 78783427 | 396 | Distal Intergenic | ENSG00000262833 | -3600 |
| chr17 | 78933356 | 78933751 | 396 | Promoter (1-2kb)  | ENSG00000262662 | 1762  |
| chr17 | 78947364 | 78947723 | 360 | Promoter (2-3kb)  | ENSG00000261924 | -2351 |
| chr17 | 78970572 | 78970931 | 360 | Promoter (2-3kb)  | ENSG00000263218 | 2996  |
| chr17 | 78974267 | 78974662 | 396 | Promoter (<=1kb)  | ENSG00000263218 | -337  |
| chr17 | 78978773 | 78979168 | 396 | Distal Intergenic | ENSG00000263218 | -4843 |
| chr17 | 78993501 | 78993896 | 396 | Promoter (<=1kb)  | ENSG00000262873 | 0     |
| chr17 | 79009971 | 79010330 | 360 | Promoter (1-2kb)  | ENSG00000226137 | -1470 |
| chr17 | 79106869 | 79107228 | 360 | Promoter (2-3kb)  | ENSG00000263167 | -2343 |
| chr17 | 79200574 | 79200969 | 396 | Promoter (1-2kb)  | ENSG00000260005 | -1538 |
| chr17 | 79352330 | 79352689 | 360 | Promoter (<=1kb)  | ENSG00000262223 | 946   |
| chr17 | 79486979 | 79487338 | 360 | Promoter (<=1kb)  | ENSG00000229848 | 913   |
| chr17 | 79796702 | 79797061 | 360 | Distal Intergenic | ENSG00000262831 | -3980 |
| chr17 | 79796703 | 79797098 | 396 | Distal Intergenic | ENSG00000262831 | -3943 |
| chr17 | 79797482 | 79797877 | 396 | Distal Intergenic | ENSG00000262831 | -3164 |
| chr17 | 79798179 | 79798574 | 396 | Promoter (2-3kb)  | ENSG00000262831 | -2467 |
| chr17 | 79798355 | 79798714 | 360 | Promoter (2-3kb)  | ENSG00000262831 | -2327 |
| chr17 | 79798402 | 79798797 | 396 | Promoter (2-3kb)  | ENSG00000262831 | -2244 |
| chr17 | 79801125 | 79801484 | 360 | Promoter (<=1kb)  | ENSG00000262831 | 84    |
| chr17 | 79801176 | 79801571 | 396 | Promoter (<=1kb)  | ENSG00000262831 | 135   |
| chr17 | 79801325 | 79801684 | 360 | Promoter (<=1kb)  | ENSG00000262831 | 284   |
| chr17 | 79820497 | 79820856 | 360 | Distal Intergenic | ENSG00000262413 | -4741 |
| chr17 | 79821321 | 79821680 | 360 | Distal Intergenic | ENSG00000262413 | -3917 |
| chr17 | 79821371 | 79821766 | 396 | Distal Intergenic | ENSG00000262413 | -3831 |
| chr17 | 79821549 | 79821908 | 360 | Distal Intergenic | ENSG00000262413 | -3689 |
| chr17 | 79821589 | 79821984 | 396 | Distal Intergenic | ENSG00000262413 | -3613 |
| chr17 | 79821838 | 79822233 | 396 | Distal Intergenic | ENSG00000262413 | -3364 |
| chr17 | 79822519 | 79822914 | 396 | Promoter (2-3kb)  | ENSG00000262413 | -2683 |
| chr17 | 79822837 | 79823232 | 396 | Promoter (2-3kb)  | ENSG00000262413 | -2365 |
| chr17 | 79823188 | 79823583 | 396 | Promoter (2-3kb)  | ENSG00000262413 | -2014 |
| chr17 | 79825020 | 79825379 | 360 | Promoter (<=1kb)  | ENSG00000262413 | -218  |
| chr17 | 79831497 | 79831856 | 360 | Distal Intergenic | ENSG00000263859 | -4687 |
| chr17 | 79832669 | 79833028 | 360 | Distal Intergenic | ENSG00000263859 | -3515 |
| chr17 | 79832723 | 79833118 | 396 | Distal Intergenic | ENSG00000263859 | -3425 |
| chr17 | 79836473 | 79836832 | 360 | Promoter (<=1kb)  | ENSG00000263859 | 0     |
| chr17 | 79836731 | 79837090 | 360 | Promoter (<=1kb)  | ENSG00000263859 | 188   |
| chr17 | 79837323 | 79837718 | 396 | Promoter (<=1kb)  | ENSG00000263859 | 780   |
| chr17 | 79838215 | 79838610 | 396 | Promoter (<=1kb)  | ENSG00000263731 | 372   |
| chr17 | 79839286 | 79839681 | 396 | Promoter (<=1kb)  | ENSG00000263731 | -304  |
| chr17 | 79839591 | 79839986 | 396 | Promoter (<=1kb)  | ENSG00000263731 | -609  |
| chr17 | 79839622 | 79839981 | 360 | Promoter (<=1kb)  | ENSG00000263731 | -640  |
| chr17 | 79839915 | 79840310 | 396 | Promoter (<=1kb)  | ENSG00000263731 | -933  |
| chr17 | 79843729 | 79844088 | 360 | Distal Intergenic | ENSG00000263731 | -4747 |
| chr17 | 79896680 | 79897039 | 360 | Promoter (2-3kb)  | ENSG00000235296 | -2706 |
| chr17 | 79924200 | 79924559 | 360 | Promoter (<=1kb)  | ENSG00000264735 | 0     |
| chr17 | 79991860 | 79992219 | 360 | Distal Intergenic | ENSG00000264569 | -3562 |
| chr17 | 79992074 | 79992433 | 360 | Distal Intergenic | ENSG00000264569 | -3348 |
| chr17 | 79992317 | 79992676 | 360 | Distal Intergenic | ENSG00000264569 | -3105 |
| chr17 | 79992453 | 79992848 | 396 | Promoter (2-3kb)  | ENSG00000264569 | -2933 |
| chr17 | 79992946 | 79993341 | 396 | Promoter (2-3kb)  | ENSG00000264569 | -2440 |
| chr17 | 79993141 | 79993500 | 360 | Promoter (2-3kb)  | ENSG00000264569 | -2281 |
| chr17 | 79993611 | 79994006 | 396 | Promoter (1-2kb)  | ENSG00000264569 | -1775 |
| chr17 | 79993628 | 79993987 | 360 | Promoter (1-2kb)  | ENSG00000264569 | -1794 |

|       |          |          |     |                   |                 |       |
|-------|----------|----------|-----|-------------------|-----------------|-------|
| chr17 | 79994767 | 79995162 | 396 | Promoter (<=1kb)  | ENSG00000264569 | -619  |
| chr17 | 79997144 | 79997539 | 396 | Promoter (1-2kb)  | ENSG00000264569 | 1237  |
| chr17 | 80250686 | 80251081 | 396 | Promoter (<=1kb)  | ENSG00000265692 | 0     |
| chr17 | 80252880 | 80253275 | 396 | Promoter (1-2kb)  | ENSG00000260563 | 1288  |
| chr17 | 80414425 | 80414784 | 360 | Promoter (<=1kb)  | ENSG00000265458 | 791   |
| chr17 | 80414920 | 80415279 | 360 | Promoter (<=1kb)  | ENSG00000265458 | 296   |
| chr17 | 80415097 | 80415492 | 396 | Promoter (<=1kb)  | ENSG00000265458 | 83    |
| chr17 | 80415123 | 80415482 | 360 | Promoter (<=1kb)  | ENSG00000265458 | 93    |
| chr17 | 80415315 | 80415710 | 396 | Promoter (<=1kb)  | ENSG00000265458 | 0     |
| chr17 | 80419256 | 80419615 | 360 | Promoter (2-3kb)  | ENSG00000265458 | -2859 |
| chr17 | 80441063 | 80441458 | 396 | Promoter (1-2kb)  | ENSG00000266236 | 1089  |
| chr17 | 80531166 | 80531525 | 360 | Distal Intergenic | ENSG00000262652 | -4374 |
| chr17 | 80543694 | 80544089 | 396 | Promoter (2-3kb)  | ENSG00000262147 | 2198  |
| chr17 | 80543896 | 80544291 | 396 | Promoter (1-2kb)  | ENSG00000262147 | 1996  |
| chr17 | 80560223 | 80560582 | 360 | Promoter (1-2kb)  | ENSG00000261845 | 1472  |
| chr17 | 80560520 | 80560879 | 360 | Promoter (1-2kb)  | ENSG00000261845 | 1175  |
| chr17 | 80694096 | 80694491 | 396 | Promoter (2-3kb)  | ENSG00000263321 | -2077 |
| chr17 | 80694102 | 80694461 | 360 | Promoter (2-3kb)  | ENSG00000263321 | -2083 |
| chr17 | 80697808 | 80698167 | 360 | Distal Intergenic | ENSG00000262410 | -4777 |
| chr17 | 81062082 | 81062441 | 360 | Promoter (<=1kb)  | ENSG00000261888 | 877   |
| chr17 | 81087132 | 81087491 | 360 | Distal Intergenic | ENSG00000262898 | -4409 |
| chr17 | 81165255 | 81165614 | 360 | Promoter (2-3kb)  | ENSG00000262952 | -2581 |
| chr17 | 81165736 | 81166095 | 360 | Promoter (2-3kb)  | ENSG00000262952 | -2100 |
| chr17 | 81172788 | 81173147 | 360 | Promoter (1-2kb)  | ENSG00000262094 | 1125  |
| chr18 | 264103   | 264462   | 360 | Distal Intergenic | ENSG00000263884 | -3686 |
| chr18 | 264361   | 264720   | 360 | Distal Intergenic | ENSG00000263884 | -3428 |
| chr18 | 267934   | 268329   | 396 | Promoter (<=1kb)  | ENSG00000263884 | 0     |
| chr18 | 268134   | 268529   | 396 | Promoter (<=1kb)  | ENSG00000263884 | 0     |
| chr18 | 268136   | 268495   | 360 | Promoter (<=1kb)  | ENSG00000263884 | 0     |
| chr18 | 268876   | 269271   | 396 | Promoter (<=1kb)  | ENSG00000263884 | 728   |
| chr18 | 269354   | 269749   | 396 | Promoter (1-2kb)  | ENSG00000263884 | 1206  |
| chr18 | 269554   | 269949   | 396 | Promoter (1-2kb)  | ENSG00000263884 | 1406  |
| chr18 | 312717   | 313076   | 360 | Distal Intergenic | ENSG00000264514 | -3661 |
| chr18 | 655897   | 656256   | 360 | Promoter (1-2kb)  | ENSG00000263727 | 1003  |
| chr18 | 656113   | 656472   | 360 | Promoter (<=1kb)  | ENSG00000263727 | 787   |
| chr18 | 658115   | 658474   | 360 | Promoter (<=1kb)  | ENSG00000263727 | -856  |
| chr18 | 658181   | 658396   | 216 | Promoter (<=1kb)  | ENSG00000263727 | -922  |
| chr18 | 658785   | 659144   | 360 | Promoter (1-2kb)  | ENSG00000263727 | -1526 |
| chr18 | 811673   | 812068   | 396 | Promoter (1-2kb)  | ENSG00000273355 | -1207 |
| chr18 | 812409   | 812768   | 360 | Promoter (<=1kb)  | ENSG00000273355 | -507  |
| chr18 | 812421   | 812816   | 396 | Promoter (<=1kb)  | ENSG00000273355 | -459  |
| chr18 | 815090   | 815449   | 360 | Promoter (1-2kb)  | ENSG00000273355 | 1815  |
| chr18 | 1392101  | 1392460  | 360 | Promoter (<=1kb)  | ENSG00000132204 | 0     |
| chr18 | 2567211  | 2567606  | 396 | Distal Intergenic | ENSG00000266783 | -4992 |
| chr18 | 2950973  | 2951368  | 396 | Promoter (2-3kb)  | ENSG00000265907 | 2634  |
| chr18 | 2967905  | 2968300  | 396 | Promoter (<=1kb)  | ENSG00000266397 | 889   |
| chr18 | 2968114  | 2968509  | 396 | Promoter (1-2kb)  | ENSG00000266397 | 1098  |
| chr18 | 3244305  | 3244700  | 396 | Promoter (2-3kb)  | ENSG00000272688 | 2384  |
| chr18 | 3245376  | 3245735  | 360 | Promoter (1-2kb)  | ENSG00000272688 | 1349  |
| chr18 | 3245899  | 3246258  | 360 | Promoter (<=1kb)  | ENSG00000272688 | 826   |
| chr18 | 3246991  | 3247386  | 396 | Promoter (<=1kb)  | ENSG00000272688 | 0     |
| chr18 | 3247236  | 3247631  | 396 | Promoter (<=1kb)  | ENSG00000272688 | -152  |
| chr18 | 3248134  | 3248529  | 396 | Promoter (1-2kb)  | ENSG00000272688 | -1050 |
| chr18 | 3248393  | 3248788  | 396 | Promoter (1-2kb)  | ENSG00000272688 | -1309 |
| chr18 | 3261536  | 3261931  | 396 | Promoter (<=1kb)  | ENSG00000264235 | 0     |
| chr18 | 3261789  | 3262148  | 360 | Promoter (<=1kb)  | ENSG00000264235 | 0     |
| chr18 | 3261821  | 3262216  | 396 | Promoter (<=1kb)  | ENSG00000264235 | 0     |
| chr18 | 3262283  | 3262678  | 396 | Promoter (<=1kb)  | ENSG00000264235 | -435  |

|       |         |         |     |                     |                 |       |
|-------|---------|---------|-----|---------------------|-----------------|-------|
| chr18 | 3592319 | 3592678 | 360 | Promoter (1-2kb)    | ENSG00000177337 | -1052 |
| chr18 | 3593480 | 3593875 | 396 | Promoter (<=1kb)    | ENSG00000177337 | 0     |
| chr18 | 3594066 | 3594461 | 396 | Promoter (<=1kb)    | ENSG00000177337 | 0     |
| chr18 | 3594306 | 3594701 | 396 | Promoter (<=1kb)    | ENSG00000177337 | 0     |
| chr18 | 3595238 | 3595633 | 396 | Promoter (<=1kb)    | ENSG00000177337 | 785   |
| chr18 | 3597365 | 3597724 | 360 | Promoter (2-3kb)    | ENSG00000177337 | 2912  |
| chr18 | 3598970 | 3599365 | 396 | Distal Intergenic   | ENSG00000262001 | -3633 |
| chr18 | 3652633 | 3653028 | 396 | Promoter (<=1kb)    | ENSG00000266401 | -382  |
| chr18 | 3652843 | 3653238 | 396 | Promoter (<=1kb)    | ENSG00000266401 | -172  |
| chr18 | 3655535 | 3655894 | 360 | Promoter (2-3kb)    | ENSG00000266401 | 2125  |
| chr18 | 3655604 | 3655999 | 396 | Promoter (2-3kb)    | ENSG00000266401 | 2194  |
| chr18 | 3771414 | 3771809 | 396 | Promoter (<=1kb)    | ENSG00000266513 | 0     |
| chr18 | 5237764 | 5238159 | 396 | Promoter (<=1kb)    | ENSG00000263753 | 0     |
| chr18 | 5238241 | 5238600 | 360 | Promoter (<=1kb)    | ENSG00000265091 | 0     |
| chr18 | 5238371 | 5238766 | 396 | Promoter (<=1kb)    | ENSG00000265091 | 0     |
| chr18 | 5238444 | 5238803 | 360 | Promoter (<=1kb)    | ENSG00000265091 | 0     |
| chr18 | 5238577 | 5238972 | 396 | Promoter (<=1kb)    | ENSG00000264575 | 0     |
| chr18 | 5240526 | 5240921 | 396 | Promoter (<=1kb)    | ENSG00000263753 | -68   |
| chr18 | 5746886 | 5747281 | 396 | Promoter (1-2kb)    | ENSG00000261738 | -1537 |
| chr18 | 6934139 | 6934534 | 396 | Distal Intergenic   | ENSG00000265933 | -4174 |
| chr18 | 7747372 | 7747731 | 360 | Promoter (1-2kb)    | ENSG00000266767 | 1710  |
| chr18 | 7754729 | 7755088 | 360 | Promoter (<=1kb)    | ENSG00000266767 | 0     |
| chr18 | 7754835 | 7755230 | 396 | Promoter (<=1kb)    | ENSG00000266767 | -6    |
| chr18 | 7755646 | 7756041 | 396 | Promoter (<=1kb)    | ENSG00000266767 | -817  |
| chr18 | 8409905 | 8410264 | 360 | Promoter (2-3kb)    | ENSG00000263970 | -2954 |
| chr18 | 8704707 | 8705102 | 396 | Promoter (2-3kb)    | ENSG00000265962 | 2517  |
| chr18 | 8798055 | 8798414 | 360 | Distal Intergenic   | ENSG00000272788 | -3240 |
| chr18 | 9101961 | 9102356 | 396 | Promoter (<=1kb)    | ENSG00000265257 | -378  |
| chr18 | 9102639 | 9103034 | 396 | Promoter (<=1kb)    | ENSG00000265257 | 0     |
| chr18 | 9102949 | 9103344 | 396 | Promoter (<=1kb)    | ENSG00000265257 | 215   |
| chr18 | 9103505 | 9103864 | 360 | Promoter (<=1kb)    | ENSG00000265257 | 771   |
| chr18 | 9104782 | 9105177 | 396 | Promoter (2-3kb)    | ENSG00000265257 | 2048  |
| chr18 | 9105085 | 9105480 | 396 | Promoter (2-3kb)    | ENSG00000265257 | 2351  |
| chr18 | 9105327 | 9105722 | 396 | Promoter (2-3kb)    | ENSG00000265257 | 2593  |
| chr18 | 9134281 | 9134640 | 360 | Promoter (<=1kb)    | ENSG00000266053 | -861  |
| chr18 | 9136020 | 9136379 | 360 | Promoter (<=1kb)    | ENSG00000266053 | 110   |
| chr18 | 9136037 | 9136432 | 396 | Promoter (<=1kb)    | ENSG00000266053 | 57    |
| chr18 | 9136621 | 9137016 | 396 | Promoter (<=1kb)    | ENSG00000266053 | 0     |
| chr18 | 9137772 | 9138167 | 396 | Promoter (1-2kb)    | ENSG00000266053 | -1129 |
| chr18 | 9138032 | 9138427 | 396 | Promoter (1-2kb)    | ENSG00000266053 | -1389 |
| chr18 | 9138230 | 9138589 | 360 | Promoter (1-2kb)    | ENSG00000266053 | -1587 |
| chr18 | 9138289 | 9138684 | 396 | Promoter (1-2kb)    | ENSG00000266053 | -1646 |
| chr18 | 9139766 | 9140161 | 396 | Intron (ENST000005) | ENSG00000266053 | -3123 |
| chr18 | 9333971 | 9334366 | 396 | Promoter (<=1kb)    | ENSG00000264964 | 73    |
| chr18 | 9334279 | 9334674 | 396 | Promoter (<=1kb)    | ENSG00000264964 | 0     |
| chr18 | 9334753 | 9335148 | 396 | Promoter (<=1kb)    | ENSG00000264964 | -314  |
| chr18 | 9334767 | 9335126 | 360 | Promoter (<=1kb)    | ENSG00000264964 | -328  |
| chr18 | 9335012 | 9335407 | 396 | Promoter (<=1kb)    | ENSG00000264964 | -573  |
| chr18 | 9474327 | 9474686 | 360 | Promoter (<=1kb)    | ENSG00000273335 | -323  |
| chr18 | 9475057 | 9475416 | 360 | Promoter (1-2kb)    | ENSG00000273335 | -1053 |
| chr18 | 9475071 | 9475466 | 396 | Promoter (1-2kb)    | ENSG00000273335 | -1067 |
| chr18 | 9476361 | 9476720 | 360 | Promoter (2-3kb)    | ENSG00000273335 | -2357 |
| chr18 | 9521601 | 9521996 | 396 | Promoter (2-3kb)    | ENSG00000273352 | 2154  |
| chr18 | 9611693 | 9612088 | 396 | Distal Intergenic   | ENSG00000263627 | -3174 |
| chr18 | 9612087 | 9612446 | 360 | Promoter (2-3kb)    | ENSG00000263627 | -2816 |
| chr18 | 9613626 | 9613985 | 360 | Promoter (1-2kb)    | ENSG00000263627 | -1277 |
| chr18 | 9613850 | 9614245 | 396 | Promoter (1-2kb)    | ENSG00000263627 | -1017 |
| chr18 | 9614927 | 9615322 | 396 | Promoter (<=1kb)    | ENSG00000263627 | 0     |

|       |          |          |     |                                     |                 |       |
|-------|----------|----------|-----|-------------------------------------|-----------------|-------|
| chr18 | 9913476  | 9913871  | 396 | Promoter (<=1kb)                    | ENSG00000272799 | -630  |
| chr18 | 9914035  | 9914430  | 396 | Promoter (1-2kb)                    | ENSG00000272799 | -1189 |
| chr18 | 11394999 | 11395394 | 396 | Distal Intergenic                   | ENSG00000273119 | -4271 |
| chr18 | 11500407 | 11500802 | 396 | Intron (ENST000005:ENSG00000267252) | ENSG00000267252 | -4976 |
| chr18 | 11501920 | 11502279 | 360 | Intron (ENST000005:ENSG00000267252) | ENSG00000267252 | -3499 |
| chr18 | 11671941 | 11672300 | 360 | Promoter (1-2kb)                    | ENSG00000260759 | -1777 |
| chr18 | 11849890 | 11850285 | 396 | Promoter (2-3kb)                    | ENSG00000267165 | 2465  |
| chr18 | 11850127 | 11850522 | 396 | Promoter (2-3kb)                    | ENSG00000267165 | 2228  |
| chr18 | 11850450 | 11850845 | 396 | Promoter (1-2kb)                    | ENSG00000267165 | 1905  |
| chr18 | 11850650 | 11851045 | 396 | Promoter (1-2kb)                    | ENSG00000267165 | 1705  |
| chr18 | 11851172 | 11851567 | 396 | Promoter (1-2kb)                    | ENSG00000267165 | 1183  |
| chr18 | 11851263 | 11851622 | 360 | Promoter (1-2kb)                    | ENSG00000267165 | 1128  |
| chr18 | 11851396 | 11851791 | 396 | Promoter (<=1kb)                    | ENSG00000267165 | 959   |
| chr18 | 11851466 | 11851825 | 360 | Promoter (<=1kb)                    | ENSG00000267165 | 925   |
| chr18 | 11859959 | 11860354 | 396 | Promoter (2-3kb)                    | ENSG00000272703 | -2406 |
| chr18 | 11860169 | 11860564 | 396 | Promoter (2-3kb)                    | ENSG00000272703 | -2616 |
| chr18 | 11907939 | 11908298 | 360 | Promoter (<=1kb)                    | ENSG00000273141 | -413  |
| chr18 | 11908202 | 11908561 | 360 | Promoter (<=1kb)                    | ENSG00000273141 | -150  |
| chr18 | 11908429 | 11908788 | 360 | Promoter (<=1kb)                    | ENSG00000273141 | 0     |
| chr18 | 11908459 | 11908854 | 396 | Promoter (<=1kb)                    | ENSG00000273141 | 0     |
| chr18 | 11909369 | 11909728 | 360 | Promoter (<=1kb)                    | ENSG00000273141 | 658   |
| chr18 | 12991195 | 12991554 | 360 | Promoter (<=1kb)                    | ENSG00000266969 | -23   |
| chr18 | 13502590 | 13502949 | 360 | Promoter (1-2kb)                    | ENSG00000267366 | -1302 |
| chr18 | 13523999 | 13524394 | 396 | Promoter (1-2kb)                    | ENSG00000267136 | -1112 |
| chr18 | 13649748 | 13650143 | 396 | Distal Intergenic                   | ENSG00000266954 | -4064 |
| chr18 | 21600014 | 21600373 | 360 | Distal Intergenic                   | ENSG00000264745 | -4711 |
| chr18 | 21703278 | 21703637 | 360 | Promoter (2-3kb)                    | ENSG00000264924 | -2311 |
| chr18 | 21704634 | 21705029 | 396 | Distal Intergenic                   | ENSG00000264924 | -3667 |
| chr18 | 21705319 | 21705714 | 396 | Distal Intergenic                   | ENSG00000264924 | -4352 |
| chr18 | 21740682 | 21741041 | 360 | Promoter (1-2kb)                    | ENSG00000265750 | 1134  |
| chr18 | 21740760 | 21741155 | 396 | Promoter (1-2kb)                    | ENSG00000265750 | 1020  |
| chr18 | 21741765 | 21742160 | 396 | Promoter (<=1kb)                    | ENSG00000265750 | 15    |
| chr18 | 21741884 | 21742243 | 360 | Promoter (<=1kb)                    | ENSG00000265750 | 0     |
| chr18 | 21742028 | 21742423 | 396 | Promoter (<=1kb)                    | ENSG00000265750 | 0     |
| chr18 | 21744814 | 21745209 | 396 | Promoter (2-3kb)                    | ENSG00000265750 | -2639 |
| chr18 | 22070176 | 22070535 | 360 | Promoter (<=1kb)                    | ENSG00000264695 | 837   |
| chr18 | 22071482 | 22071877 | 396 | Promoter (2-3kb)                    | ENSG00000264695 | 2143  |
| chr18 | 25533194 | 25533589 | 396 | Promoter (<=1kb)                    | ENSG00000227279 | -894  |
| chr18 | 25533207 | 25533566 | 360 | Promoter (<=1kb)                    | ENSG00000227279 | -917  |
| chr18 | 36266411 | 36266770 | 360 | Promoter (1-2kb)                    | ENSG00000268566 | 1192  |
| chr18 | 36267462 | 36267821 | 360 | Promoter (<=1kb)                    | ENSG00000268566 | 141   |
| chr18 | 39735737 | 39736096 | 360 | Distal Intergenic                   | ENSG00000267586 | -3151 |
| chr18 | 39737880 | 39738239 | 360 | Promoter (1-2kb)                    | ENSG00000267586 | -1008 |
| chr18 | 42114118 | 42114477 | 360 | Promoter (2-3kb)                    | ENSG00000267337 | -2456 |
| chr18 | 42114198 | 42114593 | 396 | Promoter (2-3kb)                    | ENSG00000267337 | -2536 |
| chr18 | 42114393 | 42114752 | 360 | Promoter (2-3kb)                    | ENSG00000267337 | -2731 |
| chr18 | 43087171 | 43087530 | 360 | Promoter (<=1kb)                    | ENSG00000267354 | 4     |
| chr18 | 44813573 | 44813932 | 360 | Promoter (1-2kb)                    | ENSG00000267761 | 1477  |
| chr18 | 45099906 | 45100301 | 396 | Promoter (<=1kb)                    | ENSG00000267761 | -666  |
| chr18 | 47272277 | 47272672 | 396 | Distal Intergenic                   | ENSG00000267674 | -3844 |
| chr18 | 51096724 | 51097083 | 360 | Promoter (1-2kb)                    | ENSG00000263438 | 1871  |
| chr18 | 52549383 | 52549778 | 396 | Promoter (2-3kb)                    | ENSG00000267311 | 2695  |
| chr18 | 55635226 | 55635621 | 396 | Distal Intergenic                   | ENSG00000267209 | -3560 |
| chr18 | 57029822 | 57030217 | 396 | Promoter (1-2kb)                    | ENSG00000267677 | 1890  |
| chr18 | 57353873 | 57354268 | 396 | Promoter (<=1kb)                    | ENSG00000267269 | 821   |
| chr18 | 57360380 | 57360739 | 360 | Promoter (2-3kb)                    | ENSG00000267774 | -2952 |
| chr18 | 57362809 | 57363168 | 360 | Promoter (<=1kb)                    | ENSG00000267774 | -523  |
| chr18 | 58574952 | 58575347 | 396 | Distal Intergenic                   | ENSG00000267098 | -4993 |

|       |          |          |     |                     |                 |       |
|-------|----------|----------|-----|---------------------|-----------------|-------|
| chr18 | 59343684 | 59344079 | 396 | Intron (ENST000005) | ENSG00000267038 | -4807 |
| chr18 | 62796560 | 62796955 | 396 | Distal Intergenic   | ENSG00000263863 | -3614 |
| chr18 | 70414002 | 70414397 | 396 | Promoter (<=1kb)    | ENSG00000265579 | -806  |
| chr18 | 74082568 | 74082927 | 360 | Promoter (1-2kb)    | ENSG00000263982 | -1745 |
| chr18 | 74326021 | 74326380 | 360 | Promoter (<=1kb)    | ENSG00000266256 | -789  |
| chr18 | 74326215 | 74326610 | 396 | Promoter (<=1kb)    | ENSG00000266256 | -559  |
| chr18 | 74402669 | 74403028 | 360 | Promoter (<=1kb)    | ENSG00000229055 | 623   |
| chr18 | 75131668 | 75132063 | 396 | Promoter (1-2kb)    | ENSG00000264015 | -1512 |
| chr18 | 77367240 | 77367635 | 396 | Distal Intergenic   | ENSG00000267409 | -3112 |
| chr18 | 77367616 | 77367975 | 360 | Promoter (2-3kb)    | ENSG00000267409 | -2772 |
| chr19 | 506459   | 506854   | 396 | Promoter (<=1kb)    | ENSG00000266933 | 959   |
| chr19 | 506568   | 506927   | 360 | Promoter (<=1kb)    | ENSG00000266933 | 886   |
| chr19 | 507150   | 507545   | 396 | Promoter (<=1kb)    | ENSG00000266933 | 268   |
| chr19 | 507278   | 507637   | 360 | Promoter (<=1kb)    | ENSG00000266933 | 176   |
| chr19 | 569551   | 569910   | 360 | Promoter (1-2kb)    | ENSG00000267751 | 1824  |
| chr19 | 571333   | 571728   | 396 | Promoter (<=1kb)    | ENSG00000267751 | 6     |
| chr19 | 572257   | 572652   | 396 | Promoter (<=1kb)    | ENSG00000267751 | -42   |
| chr19 | 572372   | 572731   | 360 | Promoter (<=1kb)    | ENSG00000267751 | -157  |
| chr19 | 619719   | 620078   | 360 | Promoter (2-3kb)    | ENSG00000266939 | -2560 |
| chr19 | 663489   | 663848   | 360 | Promoter (<=1kb)    | ENSG00000267666 | 7     |
| chr19 | 664806   | 665165   | 360 | Promoter (1-2kb)    | ENSG00000267666 | 1324  |
| chr19 | 664861   | 665256   | 396 | Promoter (1-2kb)    | ENSG00000267666 | 1379  |
| chr19 | 778920   | 779315   | 396 | Promoter (2-3kb)    | ENSG00000272473 | 2547  |
| chr19 | 778941   | 779300   | 360 | Promoter (2-3kb)    | ENSG00000272473 | 2562  |
| chr19 | 781157   | 781516   | 360 | Promoter (<=1kb)    | ENSG00000272473 | 346   |
| chr19 | 782625   | 783020   | 396 | Promoter (<=1kb)    | ENSG00000267530 | 0     |
| chr19 | 926747   | 927142   | 396 | Promoter (1-2kb)    | ENSG00000267159 | 1675  |
| chr19 | 930030   | 930425   | 396 | Promoter (1-2kb)    | ENSG00000267159 | -1213 |
| chr19 | 930230   | 930625   | 396 | Promoter (1-2kb)    | ENSG00000267159 | -1413 |
| chr19 | 933335   | 933694   | 360 | Distal Intergenic   | ENSG00000267159 | -4518 |
| chr19 | 933357   | 933752   | 396 | Distal Intergenic   | ENSG00000267159 | -4540 |
| chr19 | 1035689  | 1036084  | 396 | Promoter (2-3kb)    | ENSG00000267020 | 2979  |
| chr19 | 1039553  | 1039912  | 360 | Promoter (<=1kb)    | ENSG00000267020 | -490  |
| chr19 | 1239780  | 1240139  | 360 | Promoter (1-2kb)    | ENSG00000267778 | 1602  |
| chr19 | 1266796  | 1267155  | 360 | Promoter (2-3kb)    | ENSG00000267493 | 2984  |
| chr19 | 1266997  | 1267356  | 360 | Promoter (2-3kb)    | ENSG00000267493 | 2783  |
| chr19 | 1268899  | 1269258  | 360 | Promoter (<=1kb)    | ENSG00000267493 | 881   |
| chr19 | 1269724  | 1270119  | 396 | Promoter (<=1kb)    | ENSG00000267493 | 20    |
| chr19 | 1269990  | 1270385  | 396 | Promoter (<=1kb)    | ENSG00000267493 | 0     |
| chr19 | 1275109  | 1275504  | 396 | Distal Intergenic   | ENSG00000267493 | -4869 |
| chr19 | 1316205  | 1316600  | 396 | Distal Intergenic   | ENSG00000267372 | -4624 |
| chr19 | 1395503  | 1395898  | 396 | Promoter (<=1kb)    | ENSG00000248015 | 568   |
| chr19 | 1395946  | 1396305  | 360 | Promoter (<=1kb)    | ENSG00000248015 | 161   |
| chr19 | 1396088  | 1396483  | 396 | Promoter (<=1kb)    | ENSG00000248015 | 0     |
| chr19 | 1400368  | 1400763  | 396 | Distal Intergenic   | ENSG00000248015 | -3902 |
| chr19 | 1400473  | 1400832  | 360 | Distal Intergenic   | ENSG00000248015 | -4007 |
| chr19 | 1400601  | 1400996  | 396 | Distal Intergenic   | ENSG00000248015 | -4135 |
| chr19 | 1401110  | 1401469  | 360 | Distal Intergenic   | ENSG00000248015 | -4644 |
| chr19 | 1415797  | 1416156  | 360 | Promoter (1-2kb)    | ENSG00000267759 | 1897  |
| chr19 | 1416075  | 1416434  | 360 | Promoter (2-3kb)    | ENSG00000267759 | 2175  |
| chr19 | 1456064  | 1456459  | 396 | Promoter (2-3kb)    | ENSG00000267317 | 2131  |
| chr19 | 1456995  | 1457390  | 396 | Promoter (1-2kb)    | ENSG00000267317 | 1200  |
| chr19 | 1461829  | 1462224  | 396 | Promoter (<=1kb)    | ENSG00000267317 | 540   |
| chr19 | 1481017  | 1481412  | 396 | Distal Intergenic   | ENSG00000267715 | -3123 |
| chr19 | 1481260  | 1481655  | 396 | Promoter (2-3kb)    | ENSG00000267715 | -2880 |
| chr19 | 1485723  | 1486118  | 396 | Promoter (1-2kb)    | ENSG00000267715 | 1188  |
| chr19 | 1503395  | 1503754  | 360 | Distal Intergenic   | ENSG00000267092 | -4627 |
| chr19 | 1503411  | 1503806  | 396 | Distal Intergenic   | ENSG00000267092 | -4575 |

|       |         |         |     |                          |                 |       |
|-------|---------|---------|-----|--------------------------|-----------------|-------|
| chr19 | 1812698 | 1813093 | 396 | Promoter (2-3kb)         | ENSG00000267007 | -2155 |
| chr19 | 1812718 | 1813077 | 360 | Promoter (2-3kb)         | ENSG00000267007 | -2171 |
| chr19 | 1813301 | 1813660 | 360 | Promoter (1-2kb)         | ENSG00000267007 | -1588 |
| chr19 | 1847829 | 1848224 | 396 | Distal Intergenic        | ENSG00000267125 | -4174 |
| chr19 | 1847958 | 1848317 | 360 | Distal Intergenic        | ENSG00000267125 | -4081 |
| chr19 | 1850966 | 1851325 | 360 | Promoter (1-2kb)         | ENSG00000267125 | -1073 |
| chr19 | 1855327 | 1855686 | 360 | Promoter (2-3kb)         | ENSG00000267125 | 2929  |
| chr19 | 1870246 | 1870641 | 396 | Distal Intergenic        | ENSG00000267232 | -4374 |
| chr19 | 1870474 | 1870869 | 396 | Distal Intergenic        | ENSG00000267232 | -4146 |
| chr19 | 1871238 | 1871633 | 396 | Distal Intergenic        | ENSG00000267232 | -3382 |
| chr19 | 1871490 | 1871849 | 360 | Distal Intergenic        | ENSG00000267232 | -3166 |
| chr19 | 1875428 | 1875787 | 360 | Promoter (<=1kb)         | ENSG00000261526 | 381   |
| chr19 | 1875839 | 1876234 | 396 | Promoter (<=1kb)         | ENSG00000261526 | 0     |
| chr19 | 1875904 | 1876263 | 360 | Promoter (<=1kb)         | ENSG00000261526 | 0     |
| chr19 | 2212853 | 2213248 | 396 | Promoter (2-3kb)         | ENSG00000267122 | 2316  |
| chr19 | 2213043 | 2213402 | 360 | Promoter (2-3kb)         | ENSG00000267122 | 2162  |
| chr19 | 2214951 | 2215346 | 396 | Promoter (<=1kb)         | ENSG00000267122 | 218   |
| chr19 | 2324013 | 2324372 | 360 | Distal Intergenic        | ENSG00000005206 | -4242 |
| chr19 | 2328327 | 2328722 | 396 | Promoter (<=1kb)         | ENSG00000005206 | 0     |
| chr19 | 2329076 | 2329471 | 396 | Promoter (<=1kb)         | ENSG00000005206 | 381   |
| chr19 | 2331130 | 2331525 | 396 | Promoter (<=1kb)         | ENSG00000273309 | 836   |
| chr19 | 2462895 | 2463254 | 360 | Promoter (<=1kb)         | ENSG00000267201 | -712  |
| chr19 | 2463037 | 2463432 | 396 | Promoter (<=1kb)         | ENSG00000267201 | -854  |
| chr19 | 2645817 | 2646176 | 360 | Promoter (1-2kb)         | ENSG00000267749 | -1966 |
| chr19 | 2648472 | 2648867 | 396 | Distal Intergenic        | ENSG00000267749 | -4621 |
| chr19 | 2855575 | 2855934 | 360 | Promoter (2-3kb)         | ENSG00000267063 | 2780  |
| chr19 | 3546267 | 3546662 | 396 | Promoter (2-3kb)         | ENSG00000267436 | 2070  |
| chr19 | 3553227 | 3553586 | 360 | Intron (ENST00000511111) | ENSG00000267231 | -4427 |
| chr19 | 3556670 | 3557029 | 360 | Promoter (<=1kb)         | ENSG00000267231 | -984  |
| chr19 | 3556875 | 3557234 | 360 | Promoter (<=1kb)         | ENSG00000267231 | -779  |
| chr19 | 3754349 | 3754708 | 360 | Promoter (<=1kb)         | ENSG00000267205 | 511   |
| chr19 | 3761626 | 3762021 | 396 | Distal Intergenic        | ENSG00000267138 | -4969 |
| chr19 | 4059683 | 4060078 | 396 | Promoter (2-3kb)         | ENSG00000268670 | 2669  |
| chr19 | 4060620 | 4061015 | 396 | Promoter (1-2kb)         | ENSG00000268670 | 1732  |
| chr19 | 4060655 | 4061014 | 360 | Promoter (1-2kb)         | ENSG00000268670 | 1733  |
| chr19 | 4060856 | 4061215 | 360 | Promoter (1-2kb)         | ENSG00000268670 | 1532  |
| chr19 | 4061339 | 4061734 | 396 | Promoter (1-2kb)         | ENSG00000268670 | 1013  |
| chr19 | 4337972 | 4338367 | 396 | Promoter (1-2kb)         | ENSG00000269425 | -1207 |
| chr19 | 4341217 | 4341612 | 396 | Promoter (1-2kb)         | ENSG00000269425 | 1643  |
| chr19 | 4341268 | 4341627 | 360 | Promoter (1-2kb)         | ENSG00000269425 | 1694  |
| chr19 | 4359975 | 4360370 | 396 | Promoter (1-2kb)         | ENSG00000269318 | -1530 |
| chr19 | 4448711 | 4449106 | 396 | Promoter (1-2kb)         | ENSG00000267030 | 1410  |
| chr19 | 4448958 | 4449353 | 396 | Promoter (1-2kb)         | ENSG00000267030 | 1657  |
| chr19 | 4457747 | 4458142 | 396 | Promoter (<=1kb)         | ENSG00000267011 | 614   |
| chr19 | 4468348 | 4468707 | 360 | Promoter (2-3kb)         | ENSG00000267011 | 2569  |
| chr19 | 4470499 | 4470894 | 396 | Promoter (<=1kb)         | ENSG00000267011 | 382   |
| chr19 | 4470767 | 4471162 | 396 | Promoter (<=1kb)         | ENSG00000267011 | 114   |
| chr19 | 4657076 | 4657435 | 360 | Promoter (1-2kb)         | ENSG00000268565 | -1540 |
| chr19 | 4659440 | 4659799 | 360 | Distal Intergenic        | ENSG00000268565 | -3904 |
| chr19 | 4659647 | 4660006 | 360 | Distal Intergenic        | ENSG00000268565 | -4111 |
| chr19 | 4769500 | 4769859 | 360 | Promoter (<=1kb)         | ENSG00000176840 | 207   |
| chr19 | 4769570 | 4769809 | 240 | Promoter (<=1kb)         | ENSG00000176840 | 277   |
| chr19 | 4791079 | 4791474 | 396 | Promoter (<=1kb)         | ENSG00000268536 | 0     |
| chr19 | 4791878 | 4792273 | 396 | Promoter (<=1kb)         | ENSG00000268536 | -659  |
| chr19 | 4792679 | 4793038 | 360 | Promoter (1-2kb)         | ENSG00000268536 | -1460 |
| chr19 | 4792901 | 4793260 | 360 | Promoter (1-2kb)         | ENSG00000268536 | -1682 |
| chr19 | 4832998 | 4833357 | 360 | Distal Intergenic        | ENSG00000267484 | -4987 |
| chr19 | 4910270 | 4910665 | 396 | Promoter (<=1kb)         | ENSG00000034063 | 0     |

|       |          |          |     |                   |                 |       |
|-------|----------|----------|-----|-------------------|-----------------|-------|
| chr19 | 4911714  | 4912109  | 396 | Promoter (1-2kb)  | ENSG00000034063 | 1148  |
| chr19 | 4911730  | 4912089  | 360 | Promoter (1-2kb)  | ENSG00000034063 | 1164  |
| chr19 | 5897749  | 5898144  | 396 | Promoter (1-2kb)  | ENSG00000266941 | -1762 |
| chr19 | 5900546  | 5900941  | 396 | Promoter (<=1kb)  | ENSG00000266941 | 625   |
| chr19 | 5902689  | 5903048  | 360 | Promoter (2-3kb)  | ENSG00000266941 | 2768  |
| chr19 | 5913882  | 5914277  | 396 | Promoter (<=1kb)  | ENSG00000267571 | 0     |
| chr19 | 5976112  | 5976471  | 360 | Promoter (1-2kb)  | ENSG00000266983 | -1943 |
| chr19 | 5978101  | 5978496  | 396 | Promoter (<=1kb)  | ENSG00000266983 | 0     |
| chr19 | 5978120  | 5978479  | 360 | Promoter (<=1kb)  | ENSG00000266983 | 0     |
| chr19 | 5978331  | 5978690  | 360 | Promoter (<=1kb)  | ENSG00000266983 | 0     |
| chr19 | 5981263  | 5981658  | 396 | Promoter (2-3kb)  | ENSG00000266983 | 2849  |
| chr19 | 6065467  | 6065826  | 360 | Promoter (2-3kb)  | ENSG00000267262 | -2138 |
| chr19 | 6361384  | 6361779  | 396 | Promoter (<=1kb)  | ENSG00000269802 | 381   |
| chr19 | 6361480  | 6361839  | 360 | Promoter (<=1kb)  | ENSG00000269802 | 321   |
| chr19 | 6361584  | 6361979  | 396 | Promoter (<=1kb)  | ENSG00000269802 | 181   |
| chr19 | 6392999  | 6393394  | 396 | Promoter (<=1kb)  | ENSG00000214347 | -426  |
| chr19 | 6393446  | 6393841  | 396 | Promoter (<=1kb)  | ENSG00000214347 | 0     |
| chr19 | 6393652  | 6394047  | 396 | Promoter (<=1kb)  | ENSG00000214347 | 0     |
| chr19 | 6393701  | 6394060  | 360 | Promoter (<=1kb)  | ENSG00000214347 | 0     |
| chr19 | 6748408  | 6748803  | 396 | Promoter (2-3kb)  | ENSG00000269680 | 2675  |
| chr19 | 6752282  | 6752641  | 360 | Promoter (<=1kb)  | ENSG00000269680 | -804  |
| chr19 | 6752512  | 6752871  | 360 | Promoter (1-2kb)  | ENSG00000269680 | -1034 |
| chr19 | 6753257  | 6753616  | 360 | Promoter (1-2kb)  | ENSG00000269680 | -1779 |
| chr19 | 8308038  | 8308397  | 360 | Distal Intergenic | ENSG00000271717 | -3506 |
| chr19 | 8308039  | 8308434  | 396 | Distal Intergenic | ENSG00000271717 | -3507 |
| chr19 | 8445168  | 8445527  | 360 | Promoter (2-3kb)  | ENSG00000269386 | -2457 |
| chr19 | 8445369  | 8445728  | 360 | Promoter (2-3kb)  | ENSG00000269386 | -2658 |
| chr19 | 8451769  | 8452164  | 396 | Promoter (2-3kb)  | ENSG00000269386 | 2844  |
| chr19 | 9397741  | 9398136  | 396 | Distal Intergenic | ENSG00000267510 | -4055 |
| chr19 | 9609198  | 9609593  | 396 | Promoter (<=1kb)  | ENSG00000267273 | 0     |
| chr19 | 10103075 | 10103434 | 360 | Distal Intergenic | ENSG00000267650 | -3239 |
| chr19 | 10106213 | 10106572 | 360 | Promoter (<=1kb)  | ENSG00000267650 | -101  |
| chr19 | 10204510 | 10204869 | 360 | Distal Intergenic | ENSG00000267387 | -3457 |
| chr19 | 10332990 | 10333349 | 360 | Promoter (<=1kb)  | ENSG00000175898 | 75    |
| chr19 | 10333194 | 10333553 | 360 | Promoter (<=1kb)  | ENSG00000175898 | 0     |
| chr19 | 10333206 | 10333601 | 396 | Promoter (<=1kb)  | ENSG00000175898 | 0     |
| chr19 | 10334509 | 10334904 | 396 | Promoter (<=1kb)  | ENSG00000175898 | -639  |
| chr19 | 10334512 | 10334871 | 360 | Promoter (<=1kb)  | ENSG00000175898 | -642  |
| chr19 | 10334755 | 10335114 | 360 | Promoter (<=1kb)  | ENSG00000175898 | -885  |
| chr19 | 10403348 | 10403743 | 396 | Distal Intergenic | ENSG00000267607 | -3653 |
| chr19 | 10403556 | 10403951 | 396 | Distal Intergenic | ENSG00000267607 | -3861 |
| chr19 | 10602501 | 10602860 | 360 | Promoter (<=1kb)  | ENSG00000267197 | -825  |
| chr19 | 10764335 | 10764694 | 360 | Promoter (<=1kb)  | ENSG00000267100 | 0     |
| chr19 | 10764549 | 10764908 | 360 | Promoter (<=1kb)  | ENSG00000267100 | -29   |
| chr19 | 11125992 | 11126387 | 396 | Promoter (<=1kb)  | ENSG00000266936 | 300   |
| chr19 | 11129759 | 11130118 | 360 | Distal Intergenic | ENSG00000266936 | -3072 |
| chr19 | 11129991 | 11130350 | 360 | Distal Intergenic | ENSG00000266936 | -3304 |
| chr19 | 11131068 | 11131427 | 360 | Distal Intergenic | ENSG00000266936 | -4381 |
| chr19 | 11317268 | 11317627 | 360 | Promoter (2-3kb)  | ENSG00000267082 | 2964  |
| chr19 | 11433543 | 11433902 | 360 | Promoter (<=1kb)  | ENSG00000267576 | 711   |
| chr19 | 11435292 | 11435651 | 360 | Promoter (<=1kb)  | ENSG00000267174 | -175  |
| chr19 | 11435532 | 11435891 | 360 | Promoter (<=1kb)  | ENSG00000267174 | -415  |
| chr19 | 11435536 | 11435931 | 396 | Promoter (<=1kb)  | ENSG00000267174 | -419  |
| chr19 | 11436143 | 11436502 | 360 | Promoter (1-2kb)  | ENSG00000267174 | -1026 |
| chr19 | 11482436 | 11482795 | 360 | Promoter (2-3kb)  | ENSG00000267277 | 2816  |
| chr19 | 11482485 | 11482880 | 396 | Promoter (2-3kb)  | ENSG00000267277 | 2731  |
| chr19 | 12046240 | 12046599 | 360 | Distal Intergenic | ENSG00000267274 | -4175 |
| chr19 | 12046444 | 12046803 | 360 | Distal Intergenic | ENSG00000267274 | -3971 |

|       |          |          |     |                                     |                 |       |
|-------|----------|----------|-----|-------------------------------------|-----------------|-------|
| chr19 | 12052645 | 12053040 | 396 | Promoter (1-2kb)                    | ENSG00000267274 | 1871  |
| chr19 | 12052849 | 12053244 | 396 | Promoter (2-3kb)                    | ENSG00000267274 | 2075  |
| chr19 | 12140379 | 12140738 | 360 | Intron (ENST000005:ENSG00000219665) | ENSG00000219665 | -4653 |
| chr19 | 12141171 | 12141566 | 396 | Intron (ENST000005:ENSG00000219665) | ENSG00000219665 | -3825 |
| chr19 | 12564348 | 12564707 | 360 | Promoter (2-3kb)                    | ENSG00000234848 | 2599  |
| chr19 | 12800740 | 12801135 | 396 | Promoter (1-2kb)                    | ENSG00000267791 | 1004  |
| chr19 | 12802129 | 12802524 | 396 | Promoter (2-3kb)                    | ENSG00000267791 | 2393  |
| chr19 | 12933488 | 12933883 | 396 | Promoter (2-3kb)                    | ENSG00000267424 | -2642 |
| chr19 | 12938029 | 12938424 | 396 | Promoter (1-2kb)                    | ENSG00000267424 | 1504  |
| chr19 | 12938231 | 12938626 | 396 | Promoter (1-2kb)                    | ENSG00000267424 | 1706  |
| chr19 | 12938448 | 12938807 | 360 | Promoter (1-2kb)                    | ENSG00000267424 | 1923  |
| chr19 | 13037351 | 13037710 | 360 | Distal Intergenic                   | ENSG00000266975 | -3626 |
| chr19 | 13054054 | 13054413 | 360 | Promoter (<=1kb)                    | ENSG00000267458 | 888   |
| chr19 | 13887189 | 13887548 | 360 | Promoter (2-3kb)                    | ENSG00000267633 | -2257 |
| chr19 | 13905159 | 13905518 | 360 | Promoter (2-3kb)                    | ENSG00000267582 | 2229  |
| chr19 | 13944405 | 13944800 | 396 | Promoter (2-3kb)                    | ENSG00000267519 | 2303  |
| chr19 | 14405612 | 14405971 | 360 | Promoter (1-2kb)                    | ENSG00000267723 | -1595 |
| chr19 | 14472178 | 14472573 | 396 | Promoter (2-3kb)                    | ENSG00000266913 | 2229  |
| chr19 | 14516493 | 14516888 | 396 | Promoter (2-3kb)                    | ENSG00000267379 | 2647  |
| chr19 | 14516693 | 14517088 | 396 | Promoter (2-3kb)                    | ENSG00000267379 | 2447  |
| chr19 | 14517977 | 14518372 | 396 | Promoter (1-2kb)                    | ENSG00000267379 | 1163  |
| chr19 | 14518896 | 14519291 | 396 | Promoter (<=1kb)                    | ENSG00000267379 | 244   |
| chr19 | 14571982 | 14572377 | 396 | Promoter (2-3kb)                    | ENSG00000267474 | 2769  |
| chr19 | 14572009 | 14572368 | 360 | Promoter (2-3kb)                    | ENSG00000267474 | 2796  |
| chr19 | 15333396 | 15333791 | 396 | Promoter (<=1kb)                    | ENSG00000269635 | -288  |
| chr19 | 15333505 | 15333864 | 360 | Promoter (<=1kb)                    | ENSG00000269635 | -397  |
| chr19 | 15869549 | 15869908 | 360 | Promoter (1-2kb)                    | ENSG00000268673 | -1277 |
| chr19 | 15934653 | 15935012 | 360 | Downstream (2-3kb)                  | ENSG00000214049 | -4759 |
| chr19 | 15935598 | 15935957 | 360 | Downstream (1-2kb)                  | ENSG00000214049 | -3814 |
| chr19 | 16135554 | 16135913 | 360 | Promoter (2-3kb)                    | ENSG00000205396 | 2086  |
| chr19 | 16135780 | 16136139 | 360 | Promoter (2-3kb)                    | ENSG00000205396 | 2312  |
| chr19 | 16143070 | 16143429 | 360 | Promoter (<=1kb)                    | ENSG00000167459 | 518   |
| chr19 | 16143254 | 16143649 | 396 | Promoter (<=1kb)                    | ENSG00000167459 | -478  |
| chr19 | 16143271 | 16143630 | 360 | Promoter (<=1kb)                    | ENSG00000167459 | -497  |
| chr19 | 16213238 | 16213633 | 396 | Promoter (1-2kb)                    | ENSG00000267373 | 1431  |
| chr19 | 16434846 | 16435205 | 360 | Promoter (<=1kb)                    | ENSG00000267275 | 120   |
| chr19 | 16440295 | 16440654 | 360 | Distal Intergenic                   | ENSG00000267275 | -4970 |
| chr19 | 16552724 | 16553119 | 396 | Promoter (<=1kb)                    | ENSG00000267703 | 967   |
| chr19 | 16659862 | 16660257 | 396 | Promoter (2-3kb)                    | ENSG00000268309 | -2327 |
| chr19 | 16660156 | 16660551 | 396 | Promoter (2-3kb)                    | ENSG00000268309 | -2033 |
| chr19 | 16660688 | 16661083 | 396 | Promoter (1-2kb)                    | ENSG00000268309 | -1501 |
| chr19 | 16664358 | 16664717 | 360 | Promoter (1-2kb)                    | ENSG00000268309 | 1774  |
| chr19 | 16675979 | 16676374 | 396 | Promoter (<=1kb)                    | ENSG00000269085 | 0     |
| chr19 | 16746704 | 16747063 | 360 | Promoter (<=1kb)                    | ENSG00000269044 | -624  |
| chr19 | 17159227 | 17159586 | 360 | Distal Intergenic                   | ENSG00000268289 | -3218 |
| chr19 | 17159786 | 17160181 | 396 | Promoter (2-3kb)                    | ENSG00000268289 | -2623 |
| chr19 | 17214900 | 17215295 | 396 | Distal Intergenic                   | ENSG00000269066 | -4783 |
| chr19 | 17282498 | 17282857 | 360 | Distal Intergenic                   | ENSG00000268056 | -3637 |
| chr19 | 17405253 | 17405612 | 360 | Promoter (1-2kb)                    | ENSG00000269815 | 1892  |
| chr19 | 17405453 | 17405812 | 360 | Promoter (1-2kb)                    | ENSG00000269815 | 1692  |
| chr19 | 17407089 | 17407484 | 396 | Promoter (<=1kb)                    | ENSG00000269815 | 20    |
| chr19 | 17505334 | 17505693 | 360 | Promoter (2-3kb)                    | ENSG00000269720 | -2241 |
| chr19 | 17507945 | 17508340 | 396 | Distal Intergenic                   | ENSG00000269720 | -4852 |
| chr19 | 17507973 | 17508332 | 360 | Distal Intergenic                   | ENSG00000269720 | -4880 |
| chr19 | 17511345 | 17511704 | 360 | Distal Intergenic                   | ENSG00000269640 | -4799 |
| chr19 | 17511612 | 17512007 | 396 | Distal Intergenic                   | ENSG00000269640 | -4496 |
| chr19 | 17512219 | 17512578 | 360 | Distal Intergenic                   | ENSG00000269640 | -3925 |
| chr19 | 17512435 | 17512794 | 360 | Distal Intergenic                   | ENSG00000269640 | -3709 |



|       |          |          |     |                   |                 |       |
|-------|----------|----------|-----|-------------------|-----------------|-------|
| chr19 | 17519630 | 17520025 | 396 | Promoter (2-3kb)  | ENSG00000269640 | 2684  |
| chr19 | 17563946 | 17564305 | 360 | Promoter (<=1kb)  | ENSG00000269736 | -168  |
| chr19 | 17604763 | 17605158 | 396 | Promoter (1-2kb)  | ENSG00000269439 | -1565 |
| chr19 | 17605995 | 17606390 | 396 | Promoter (2-3kb)  | ENSG00000269439 | -2797 |
| chr19 | 17606106 | 17606465 | 360 | Promoter (2-3kb)  | ENSG00000269439 | -2908 |
| chr19 | 17719147 | 17719542 | 396 | Distal Intergenic | ENSG00000269752 | -4989 |
| chr19 | 17847958 | 17848353 | 396 | Promoter (2-3kb)  | ENSG00000268112 | -2636 |
| chr19 | 18265077 | 18265436 | 360 | Promoter (2-3kb)  | ENSG00000269145 | -2576 |
| chr19 | 18315645 | 18316040 | 396 | Promoter (<=1kb)  | ENSG00000268650 | 94    |
| chr19 | 18315846 | 18316241 | 396 | Promoter (<=1kb)  | ENSG00000268650 | 295   |
| chr19 | 18318099 | 18318494 | 396 | Promoter (2-3kb)  | ENSG00000268650 | 2548  |
| chr19 | 18318385 | 18318744 | 360 | Promoter (2-3kb)  | ENSG00000268650 | 2834  |
| chr19 | 18639288 | 18639683 | 396 | Promoter (2-3kb)  | ENSG00000268938 | -2740 |
| chr19 | 18643692 | 18644051 | 360 | Promoter (<=1kb)  | ENSG00000269191 | 0     |
| chr19 | 18675259 | 18675654 | 396 | Promoter (2-3kb)  | ENSG00000268030 | -2889 |
| chr19 | 18677918 | 18678313 | 396 | Promoter (1-2kb)  | ENSG00000268983 | 1872  |
| chr19 | 18678130 | 18678525 | 396 | Promoter (1-2kb)  | ENSG00000268983 | 1660  |
| chr19 | 19097130 | 19097525 | 396 | Distal Intergenic | ENSG00000269131 | -4177 |
| chr19 | 19097242 | 19097601 | 360 | Distal Intergenic | ENSG00000269131 | -4101 |
| chr19 | 19098662 | 19099057 | 396 | Promoter (2-3kb)  | ENSG00000269131 | -2645 |
| chr19 | 19098682 | 19099041 | 360 | Promoter (2-3kb)  | ENSG00000269131 | -2661 |
| chr19 | 19098870 | 19099265 | 396 | Promoter (2-3kb)  | ENSG00000269131 | -2437 |
| chr19 | 19099515 | 19099874 | 360 | Promoter (1-2kb)  | ENSG00000269131 | -1828 |
| chr19 | 19099561 | 19099956 | 396 | Promoter (1-2kb)  | ENSG00000269131 | -1746 |
| chr19 | 19101398 | 19101757 | 360 | Promoter (<=1kb)  | ENSG00000269131 | 0     |
| chr19 | 19101693 | 19102052 | 360 | Promoter (<=1kb)  | ENSG00000269131 | 0     |
| chr19 | 19382527 | 19382922 | 396 | Promoter (1-2kb)  | ENSG00000267629 | 1256  |
| chr19 | 19385082 | 19385477 | 396 | Promoter (<=1kb)  | ENSG00000267629 | -904  |
| chr19 | 19385332 | 19385727 | 396 | Promoter (1-2kb)  | ENSG00000267629 | -1154 |
| chr19 | 19385563 | 19385958 | 396 | Promoter (1-2kb)  | ENSG00000267629 | -1385 |
| chr19 | 19514794 | 19515153 | 360 | Promoter (1-2kb)  | ENSG00000267234 | -1382 |
| chr19 | 19515891 | 19516286 | 396 | Promoter (2-3kb)  | ENSG00000267234 | -2479 |
| chr19 | 19515924 | 19516283 | 360 | Promoter (2-3kb)  | ENSG00000267234 | -2512 |
| chr19 | 21767141 | 21767536 | 396 | Promoter (2-3kb)  | ENSG00000268555 | 2588  |
| chr19 | 21767365 | 21767760 | 396 | Promoter (2-3kb)  | ENSG00000268555 | 2364  |
| chr19 | 22941200 | 22941595 | 396 | Distal Intergenic | ENSG00000180081 | -3523 |
| chr19 | 24057328 | 24057687 | 360 | Promoter (<=1kb)  | ENSG00000267924 | 0     |
| chr19 | 24060933 | 24061292 | 360 | Distal Intergenic | ENSG00000267924 | -3430 |
| chr19 | 29212663 | 29213058 | 396 | Promoter (2-3kb)  | ENSG00000267243 | 2189  |
| chr19 | 29212915 | 29213310 | 396 | Promoter (1-2kb)  | ENSG00000267243 | 1937  |
| chr19 | 30719383 | 30719742 | 360 | Promoter (<=1kb)  | ENSG00000267223 | 0     |
| chr19 | 33156219 | 33156578 | 360 | Promoter (<=1kb)  | ENSG00000267557 | -626  |
| chr19 | 33370243 | 33370638 | 396 | Promoter (<=1kb)  | ENSG00000266930 | -916  |
| chr19 | 33373092 | 33373451 | 360 | Distal Intergenic | ENSG00000266930 | -3765 |
| chr19 | 33373127 | 33373522 | 396 | Distal Intergenic | ENSG00000266930 | -3800 |
| chr19 | 33706155 | 33706550 | 396 | Promoter (2-3kb)  | ENSG00000267714 | -2173 |
| chr19 | 33777986 | 33778381 | 396 | Promoter (1-2kb)  | ENSG00000270212 | -1341 |
| chr19 | 33778194 | 33778589 | 396 | Promoter (1-2kb)  | ENSG00000270212 | -1549 |
| chr19 | 33789157 | 33789516 | 360 | Promoter (1-2kb)  | ENSG00000267580 | -1324 |
| chr19 | 34041987 | 34042346 | 360 | Distal Intergenic | ENSG00000266985 | -4128 |
| chr19 | 34851071 | 34851430 | 360 | Promoter (<=1kb)  | ENSG00000267219 | -754  |
| chr19 | 34851323 | 34851682 | 360 | Promoter (1-2kb)  | ENSG00000267219 | -1006 |
| chr19 | 34919017 | 34919376 | 360 | Promoter (<=1kb)  | ENSG00000267024 | 0     |
| chr19 | 34919116 | 34919511 | 396 | Promoter (<=1kb)  | ENSG00000267024 | 0     |
| chr19 | 35129756 | 35130115 | 360 | Promoter (1-2kb)  | ENSG00000268683 | 1479  |
| chr19 | 35130000 | 35130359 | 360 | Promoter (1-2kb)  | ENSG00000268683 | 1235  |
| chr19 | 35130161 | 35130556 | 396 | Promoter (1-2kb)  | ENSG00000268683 | 1038  |
| chr19 | 35130709 | 35131068 | 360 | Promoter (<=1kb)  | ENSG00000268683 | 526   |

|       |          |          |     |                     |                 |       |
|-------|----------|----------|-----|---------------------|-----------------|-------|
| chr19 | 35135548 | 35135907 | 360 | Distal Intergenic   | ENSG00000268683 | -3954 |
| chr19 | 35307461 | 35307856 | 396 | Promoter (<=1kb)    | ENSG00000267767 | 0     |
| chr19 | 35309002 | 35309361 | 360 | Promoter (1-2kb)    | ENSG00000267767 | -1198 |
| chr19 | 35309211 | 35309570 | 360 | Promoter (1-2kb)    | ENSG00000267767 | -1407 |
| chr19 | 35389266 | 35389625 | 360 | Promoter (<=1kb)    | ENSG00000271649 | 222   |
| chr19 | 35389504 | 35389863 | 360 | Promoter (<=1kb)    | ENSG00000271649 | 0     |
| chr19 | 35391462 | 35391821 | 360 | Promoter (1-2kb)    | ENSG00000271649 | -1615 |
| chr19 | 35394984 | 35395379 | 396 | Promoter (<=1kb)    | ENSG00000270544 | 0     |
| chr19 | 35421224 | 35421583 | 360 | Distal Intergenic   | ENSG00000270876 | -3508 |
| chr19 | 35495098 | 35495493 | 396 | Distal Intergenic   | ENSG00000269303 | -4024 |
| chr19 | 35495117 | 35495476 | 360 | Distal Intergenic   | ENSG00000269303 | -4043 |
| chr19 | 35517115 | 35517510 | 396 | Promoter (<=1kb)    | ENSG00000271032 | -876  |
| chr19 | 35627304 | 35627663 | 360 | Promoter (2-3kb)    | ENSG00000221857 | -2065 |
| chr19 | 35628817 | 35629212 | 396 | Promoter (<=1kb)    | ENSG00000221857 | -516  |
| chr19 | 35628842 | 35629201 | 360 | Promoter (<=1kb)    | ENSG00000221857 | -527  |
| chr19 | 35629019 | 35629414 | 396 | Promoter (<=1kb)    | ENSG00000221857 | -314  |
| chr19 | 35629059 | 35629418 | 360 | Promoter (<=1kb)    | ENSG00000221857 | -310  |
| chr19 | 35748283 | 35748678 | 396 | Distal Intergenic   | ENSG00000271366 | -3741 |
| chr19 | 35748300 | 35748659 | 360 | Distal Intergenic   | ENSG00000271366 | -3758 |
| chr19 | 35748483 | 35748878 | 396 | Distal Intergenic   | ENSG00000271366 | -3941 |
| chr19 | 35900107 | 35900502 | 396 | Promoter (<=1kb)    | ENSG00000205786 | 380   |
| chr19 | 35900625 | 35901020 | 396 | Promoter (<=1kb)    | ENSG00000205786 | 898   |
| chr19 | 37990462 | 37990857 | 396 | Promoter (1-2kb)    | ENSG00000266916 | -1385 |
| chr19 | 38059095 | 38059454 | 360 | Promoter (1-2kb)    | ENSG00000267470 | -1390 |
| chr19 | 38223656 | 38224051 | 396 | Promoter (2-3kb)    | ENSG00000267152 | -2112 |
| chr19 | 38223957 | 38224352 | 396 | Promoter (2-3kb)    | ENSG00000267152 | -2413 |
| chr19 | 38225849 | 38226244 | 396 | Distal Intergenic   | ENSG00000267152 | -4305 |
| chr19 | 38316121 | 38316480 | 360 | Intron (ENST000005) | ENSG00000229481 | -3711 |
| chr19 | 38318512 | 38318871 | 360 | Promoter (1-2kb)    | ENSG00000229481 | -1320 |
| chr19 | 38685525 | 38685884 | 360 | Distal Intergenic   | ENSG00000268499 | -4592 |
| chr19 | 38692690 | 38693085 | 396 | Promoter (2-3kb)    | ENSG00000268499 | 2214  |
| chr19 | 38693424 | 38693819 | 396 | Promoter (2-3kb)    | ENSG00000268499 | 2948  |
| chr19 | 38820044 | 38820439 | 396 | Promoter (1-2kb)    | ENSG00000268913 | -1835 |
| chr19 | 38849912 | 38850307 | 396 | Promoter (2-3kb)    | ENSG00000266963 | 2817  |
| chr19 | 38850168 | 38850563 | 396 | Promoter (2-3kb)    | ENSG00000266963 | 2561  |
| chr19 | 38851416 | 38851775 | 360 | Promoter (1-2kb)    | ENSG00000266963 | 1349  |
| chr19 | 38853291 | 38853650 | 360 | Promoter (<=1kb)    | ENSG00000266963 | -167  |
| chr19 | 38878394 | 38878753 | 360 | Promoter (2-3kb)    | ENSG00000267090 | 2232  |
| chr19 | 38886944 | 38887339 | 396 | Promoter (1-2kb)    | ENSG00000267473 | -1482 |
| chr19 | 39030724 | 39031119 | 396 | Promoter (2-3kb)    | ENSG00000268055 | -2956 |
| chr19 | 39306762 | 39307121 | 360 | Distal Intergenic   | ENSG00000268756 | -3685 |
| chr19 | 39306975 | 39307334 | 360 | Distal Intergenic   | ENSG00000268756 | -3472 |
| chr19 | 39362784 | 39363143 | 360 | Promoter (1-2kb)    | ENSG00000269050 | 1985  |
| chr19 | 39519096 | 39519491 | 396 | Promoter (1-2kb)    | ENSG00000267992 | -1585 |
| chr19 | 39519315 | 39519710 | 396 | Promoter (1-2kb)    | ENSG00000267992 | -1366 |
| chr19 | 39837485 | 39837880 | 396 | Distal Intergenic   | ENSG00000269246 | -4900 |
| chr19 | 39917409 | 39917768 | 360 | Promoter (<=1kb)    | ENSG00000269410 | 834   |
| chr19 | 40523026 | 40523421 | 396 | Promoter (2-3kb)    | ENSG00000268166 | -2871 |
| chr19 | 40523182 | 40523541 | 360 | Promoter (2-3kb)    | ENSG00000268166 | -2751 |
| chr19 | 41449437 | 41449832 | 396 | Promoter (2-3kb)    | ENSG00000269353 | -2420 |
| chr19 | 42034947 | 42035306 | 360 | Promoter (2-3kb)    | ENSG00000268355 | -2260 |
| chr19 | 42048981 | 42049376 | 396 | Promoter (2-3kb)    | ENSG00000268027 | -2178 |
| chr19 | 42049261 | 42049656 | 396 | Promoter (1-2kb)    | ENSG00000268027 | -1898 |
| chr19 | 42288189 | 42288548 | 360 | Promoter (2-3kb)    | ENSG00000268833 | 2253  |
| chr19 | 42290944 | 42291303 | 360 | Promoter (<=1kb)    | ENSG00000268833 | -143  |
| chr19 | 42635190 | 42635549 | 360 | Promoter (1-2kb)    | ENSG00000254887 | -1158 |
| chr19 | 43652183 | 43652542 | 360 | Distal Intergenic   | ENSG00000227606 | -4889 |
| chr19 | 44052358 | 44052753 | 396 | Distal Intergenic   | ENSG00000269177 | -4844 |

|       |          |          |     |                   |                 |       |
|-------|----------|----------|-----|-------------------|-----------------|-------|
| chr19 | 44304645 | 44305040 | 396 | Distal Intergenic | ENSG00000268601 | -4835 |
| chr19 | 44613965 | 44614360 | 396 | Promoter (2-3kb)  | ENSG00000186019 | 2749  |
| chr19 | 44614191 | 44614586 | 396 | Promoter (2-3kb)  | ENSG00000186019 | 2523  |
| chr19 | 44615699 | 44616094 | 396 | Promoter (1-2kb)  | ENSG00000186019 | 1015  |
| chr19 | 44615907 | 44616302 | 396 | Promoter (<=1kb)  | ENSG00000186019 | 807   |
| chr19 | 44953770 | 44954165 | 396 | Promoter (1-2kb)  | ENSG00000267188 | -1130 |
| chr19 | 44954906 | 44955265 | 360 | Promoter (2-3kb)  | ENSG00000267188 | -2266 |
| chr19 | 44955022 | 44955417 | 396 | Promoter (2-3kb)  | ENSG00000267188 | -2382 |
| chr19 | 44955105 | 44955464 | 360 | Promoter (2-3kb)  | ENSG00000267188 | -2465 |
| chr19 | 45032869 | 45033264 | 396 | Promoter (<=1kb)  | ENSG00000176395 | 284   |
| chr19 | 45038252 | 45038611 | 360 | Promoter (1-2kb)  | ENSG00000267614 | 1988  |
| chr19 | 45038938 | 45039333 | 396 | Promoter (1-2kb)  | ENSG00000267614 | 1266  |
| chr19 | 45038986 | 45039345 | 360 | Promoter (1-2kb)  | ENSG00000267614 | 1254  |
| chr19 | 45039983 | 45040342 | 360 | Promoter (<=1kb)  | ENSG00000267614 | 257   |
| chr19 | 45590884 | 45591279 | 396 | Promoter (2-3kb)  | ENSG00000267348 | 2353  |
| chr19 | 45590899 | 45591258 | 360 | Promoter (2-3kb)  | ENSG00000267348 | 2374  |
| chr19 | 45639608 | 45639967 | 360 | Promoter (<=1kb)  | ENSG00000267044 | 268   |
| chr19 | 45640845 | 45641204 | 360 | Promoter (<=1kb)  | ENSG00000267044 | -610  |
| chr19 | 45641045 | 45641404 | 360 | Promoter (<=1kb)  | ENSG00000267044 | -810  |
| chr19 | 45642068 | 45642463 | 396 | Promoter (1-2kb)  | ENSG00000267044 | -1833 |
| chr19 | 45642073 | 45642432 | 360 | Promoter (1-2kb)  | ENSG00000267044 | -1838 |
| chr19 | 45745931 | 45746290 | 360 | Promoter (2-3kb)  | ENSG00000267045 | 2338  |
| chr19 | 46600524 | 46600919 | 396 | Distal Intergenic | ENSG00000267922 | -3461 |
| chr19 | 46600650 | 46601009 | 360 | Distal Intergenic | ENSG00000267922 | -3371 |
| chr19 | 46602092 | 46602451 | 360 | Promoter (1-2kb)  | ENSG00000267922 | -1929 |
| chr19 | 46714533 | 46714892 | 360 | Promoter (1-2kb)  | ENSG00000268460 | 1034  |
| chr19 | 46714792 | 46715151 | 360 | Promoter (1-2kb)  | ENSG00000268460 | 1293  |
| chr19 | 46730973 | 46731332 | 360 | Promoter (2-3kb)  | ENSG00000269745 | 2313  |
| chr19 | 46847620 | 46848015 | 396 | Distal Intergenic | ENSG00000269124 | -4359 |
| chr19 | 46890874 | 46891269 | 396 | Promoter (2-3kb)  | ENSG00000269151 | 2840  |
| chr19 | 46896139 | 46896534 | 396 | Promoter (2-3kb)  | ENSG00000269151 | -2030 |
| chr19 | 46896168 | 46896527 | 360 | Promoter (2-3kb)  | ENSG00000269151 | -2059 |
| chr19 | 46896368 | 46896763 | 396 | Promoter (2-3kb)  | ENSG00000269151 | -2259 |
| chr19 | 46896396 | 46896755 | 360 | Promoter (2-3kb)  | ENSG00000269151 | -2287 |
| chr19 | 47111892 | 47112287 | 396 | Promoter (1-2kb)  | ENSG00000269292 | 1749  |
| chr19 | 47113264 | 47113623 | 360 | Promoter (<=1kb)  | ENSG00000269292 | 413   |
| chr19 | 47113270 | 47113665 | 396 | Promoter (<=1kb)  | ENSG00000269292 | 371   |
| chr19 | 47113533 | 47113892 | 360 | Promoter (<=1kb)  | ENSG00000269292 | 144   |
| chr19 | 47226595 | 47226954 | 360 | Distal Intergenic | ENSG00000269487 | -4906 |
| chr19 | 47226798 | 47227157 | 360 | Distal Intergenic | ENSG00000269487 | -4703 |
| chr19 | 47226907 | 47227302 | 396 | Distal Intergenic | ENSG00000269487 | -4558 |
| chr19 | 47227309 | 47227668 | 360 | Distal Intergenic | ENSG00000269487 | -4192 |
| chr19 | 47227533 | 47227892 | 360 | Distal Intergenic | ENSG00000269487 | -3968 |
| chr19 | 47230471 | 47230866 | 396 | Promoter (<=1kb)  | ENSG00000269487 | -994  |
| chr19 | 47230501 | 47230860 | 360 | Promoter (<=1kb)  | ENSG00000269487 | -1000 |
| chr19 | 47231241 | 47231522 | 282 | Promoter (<=1kb)  | ENSG00000269487 | -338  |
| chr19 | 47231276 | 47231499 | 224 | Promoter (<=1kb)  | ENSG00000269487 | -361  |
| chr19 | 47231412 | 47231771 | 360 | Promoter (<=1kb)  | ENSG00000269487 | -89   |
| chr19 | 47982541 | 47982900 | 360 | Distal Intergenic | ENSG00000268061 | -4639 |
| chr19 | 48110393 | 48110788 | 396 | Promoter (<=1kb)  | ENSG00000268746 | 0     |
| chr19 | 48271100 | 48271495 | 396 | Promoter (<=1kb)  | ENSG00000269656 | 602   |
| chr19 | 48271699 | 48272094 | 396 | Promoter (<=1kb)  | ENSG00000269656 | 3     |
| chr19 | 48271828 | 48272187 | 360 | Promoter (<=1kb)  | ENSG00000269656 | 0     |
| chr19 | 48366693 | 48367052 | 360 | Promoter (<=1kb)  | ENSG00000259108 | 704   |
| chr19 | 48563312 | 48563671 | 360 | Promoter (<=1kb)  | ENSG00000269420 | -957  |
| chr19 | 48563406 | 48563801 | 396 | Promoter (<=1kb)  | ENSG00000269420 | -827  |
| chr19 | 48619069 | 48619464 | 396 | Promoter (2-3kb)  | ENSG00000269534 | -2225 |
| chr19 | 48619629 | 48619988 | 360 | Promoter (1-2kb)  | ENSG00000269534 | -1701 |

|       |          |          |     |                     |                 |       |
|-------|----------|----------|-----|---------------------|-----------------|-------|
| chr19 | 48623507 | 48623902 | 396 | Promoter (1-2kb)    | ENSG00000269534 | 1812  |
| chr19 | 48651882 | 48652277 | 396 | Promoter (2-3kb)    | ENSG00000269321 | 2717  |
| chr19 | 48757312 | 48757707 | 396 | Promoter (1-2kb)    | ENSG00000268001 | -1225 |
| chr19 | 48757745 | 48758104 | 360 | Promoter (<=1kb)    | ENSG00000268001 | -828  |
| chr19 | 48757789 | 48758184 | 396 | Promoter (<=1kb)    | ENSG00000268001 | -748  |
| chr19 | 48759050 | 48759409 | 360 | Promoter (<=1kb)    | ENSG00000268001 | 118   |
| chr19 | 48771941 | 48772336 | 396 | Promoter (2-3kb)    | ENSG00000268186 | 2204  |
| chr19 | 48772527 | 48772922 | 396 | Promoter (1-2kb)    | ENSG00000268186 | 1618  |
| chr19 | 48964385 | 48964744 | 360 | Distal Intergenic   | ENSG00000269423 | -4879 |
| chr19 | 48965136 | 48965531 | 396 | Distal Intergenic   | ENSG00000269423 | -4092 |
| chr19 | 48965150 | 48965509 | 360 | Distal Intergenic   | ENSG00000269423 | -4114 |
| chr19 | 48965728 | 48966087 | 360 | Downstream (2-3kb)  | ENSG00000269423 | -3536 |
| chr19 | 48966337 | 48966732 | 396 | Promoter (2-3kb)    | ENSG00000269423 | -2891 |
| chr19 | 48967118 | 48967513 | 396 | Promoter (2-3kb)    | ENSG00000269423 | -2110 |
| chr19 | 48967321 | 48967716 | 396 | Promoter (1-2kb)    | ENSG00000269423 | -1907 |
| chr19 | 48967333 | 48967692 | 360 | Promoter (1-2kb)    | ENSG00000269423 | -1931 |
| chr19 | 48967853 | 48968212 | 360 | Promoter (1-2kb)    | ENSG00000269423 | -1411 |
| chr19 | 48967920 | 48968315 | 396 | Promoter (1-2kb)    | ENSG00000269423 | -1308 |
| chr19 | 48968123 | 48968518 | 396 | Promoter (1-2kb)    | ENSG00000269423 | -1105 |
| chr19 | 48969976 | 48970371 | 396 | Promoter (<=1kb)    | ENSG00000268530 | 0     |
| chr19 | 48970879 | 48971274 | 396 | Promoter (<=1kb)    | ENSG00000268530 | -685  |
| chr19 | 48984804 | 48985199 | 396 | Promoter (1-2kb)    | ENSG00000269751 | 1621  |
| chr19 | 48984878 | 48985237 | 360 | Promoter (1-2kb)    | ENSG00000269751 | 1695  |
| chr19 | 48986158 | 48986517 | 360 | Promoter (2-3kb)    | ENSG00000269751 | 2975  |
| chr19 | 49018094 | 49018489 | 396 | Promoter (1-2kb)    | ENSG00000269814 | -1177 |
| chr19 | 49019547 | 49019906 | 360 | Promoter (2-3kb)    | ENSG00000269814 | -2630 |
| chr19 | 49125002 | 49125397 | 396 | Promoter (1-2kb)    | ENSG00000268093 | 1261  |
| chr19 | 49127758 | 49128153 | 396 | Promoter (<=1kb)    | ENSG00000268093 | -369  |
| chr19 | 49127814 | 49128173 | 360 | Promoter (<=1kb)    | ENSG00000268093 | -425  |
| chr19 | 49127959 | 49128354 | 396 | Promoter (<=1kb)    | ENSG00000268093 | -570  |
| chr19 | 49466898 | 49467293 | 396 | Promoter (<=1kb)    | ENSG00000267898 | 0     |
| chr19 | 49525443 | 49525838 | 396 | Promoter (2-3kb)    | ENSG00000268655 | -2702 |
| chr19 | 49570103 | 49570498 | 396 | Promoter (2-3kb)    | ENSG00000268287 | 2587  |
| chr19 | 50358582 | 50358977 | 396 | Promoter (<=1kb)    | ENSG00000268047 | -358  |
| chr19 | 50368606 | 50369001 | 396 | Distal Intergenic   | ENSG00000267896 | -4835 |
| chr19 | 51320537 | 51320896 | 360 | Promoter (<=1kb)    | ENSG00000180279 | -41   |
| chr19 | 51533281 | 51533640 | 360 | Promoter (<=1kb)    | ENSG00000268906 | 0     |
| chr19 | 52023722 | 52024081 | 360 | Promoter (<=1kb)    | ENSG00000268777 | 737   |
| chr19 | 52099730 | 52100125 | 396 | Promoter (2-3kb)    | ENSG00000267808 | -2417 |
| chr19 | 52100007 | 52100402 | 396 | Promoter (2-3kb)    | ENSG00000267808 | -2140 |
| chr19 | 52201779 | 52202174 | 396 | Intron (ENST000005) | ENSG00000182310 | -3615 |
| chr19 | 52672862 | 52673221 | 360 | Promoter (1-2kb)    | ENSG00000267927 | -1190 |
| chr19 | 53430800 | 53431195 | 396 | Distal Intergenic   | ENSG00000213793 | -4077 |
| chr19 | 53507888 | 53508247 | 360 | Promoter (2-3kb)    | ENSG00000267943 | -2518 |
| chr19 | 53508011 | 53508406 | 396 | Promoter (2-3kb)    | ENSG00000267943 | -2359 |
| chr19 | 53639420 | 53639779 | 360 | Promoter (<=1kb)    | ENSG00000268613 | -845  |
| chr19 | 53640917 | 53641312 | 396 | Promoter (2-3kb)    | ENSG00000268613 | -2342 |
| chr19 | 53695234 | 53695629 | 396 | Distal Intergenic   | ENSG00000269051 | -4735 |
| chr19 | 53778007 | 53778402 | 396 | Distal Intergenic   | ENSG00000269758 | -3822 |
| chr19 | 54264765 | 54265160 | 396 | Promoter (<=1kb)    | ENSG00000269842 | -55   |
| chr19 | 55459583 | 55459942 | 360 | Distal Intergenic   | ENSG00000267502 | -3060 |
| chr19 | 55461148 | 55461543 | 396 | Promoter (1-2kb)    | ENSG00000267502 | -1459 |
| chr19 | 55461213 | 55461572 | 360 | Promoter (1-2kb)    | ENSG00000267502 | -1430 |
| chr19 | 55462010 | 55462405 | 396 | Promoter (<=1kb)    | ENSG00000267502 | -597  |
| chr19 | 55462527 | 55462886 | 360 | Promoter (<=1kb)    | ENSG00000267502 | -116  |
| chr19 | 55463649 | 55464008 | 360 | Promoter (<=1kb)    | ENSG00000267502 | 647   |
| chr19 | 55463865 | 55464224 | 360 | Promoter (<=1kb)    | ENSG00000267502 | 863   |
| chr19 | 55516909 | 55517304 | 396 | Promoter (<=1kb)    | ENSG00000267265 | -257  |

|       |          |          |     |                     |                 |       |
|-------|----------|----------|-----|---------------------|-----------------|-------|
| chr19 | 55517261 | 55517656 | 396 | Promoter (<=1kb)    | ENSG00000267265 | 0     |
| chr19 | 55535526 | 55535921 | 396 | Intron (ENST000005) | ENSG00000267265 | -3069 |
| chr19 | 55992598 | 55992993 | 396 | Distal Intergenic   | ENSG00000269859 | -4749 |
| chr19 | 56821557 | 56821916 | 360 | Promoter (1-2kb)    | ENSG00000267298 | 1939  |
| chr19 | 56829566 | 56829961 | 396 | Promoter (2-3kb)    | ENSG00000267549 | 2598  |
| chr19 | 56829822 | 56830217 | 396 | Promoter (2-3kb)    | ENSG00000267549 | 2854  |
| chr19 | 56856448 | 56856843 | 396 | Promoter (2-3kb)    | ENSG00000267429 | 2709  |
| chr19 | 56880030 | 56880425 | 396 | Promoter (<=1kb)    | ENSG00000267606 | -608  |
| chr19 | 56880067 | 56880426 | 360 | Promoter (<=1kb)    | ENSG00000267606 | -645  |
| chr19 | 56880249 | 56880644 | 396 | Promoter (<=1kb)    | ENSG00000267606 | -827  |
| chr19 | 56880823 | 56881182 | 360 | Promoter (1-2kb)    | ENSG00000267606 | -1401 |
| chr19 | 56881316 | 56881711 | 396 | Promoter (1-2kb)    | ENSG00000267606 | -1894 |
| chr19 | 56885366 | 56885725 | 360 | Promoter (2-3kb)    | ENSG00000267776 | 2928  |
| chr19 | 56900662 | 56901057 | 396 | Promoter (1-2kb)    | ENSG00000267192 | 1881  |
| chr19 | 56900687 | 56901046 | 360 | Promoter (1-2kb)    | ENSG00000267192 | 1906  |
| chr19 | 57050844 | 57051203 | 360 | Promoter (<=1kb)    | ENSG00000267421 | -900  |
| chr19 | 57082004 | 57082363 | 360 | Distal Intergenic   | ENSG00000269696 | -3224 |
| chr19 | 57788917 | 57789312 | 396 | Promoter (2-3kb)    | ENSG00000267871 | 2364  |
| chr19 | 57810583 | 57810978 | 396 | Distal Intergenic   | ENSG00000268205 | -4695 |
| chr19 | 57814541 | 57814936 | 396 | Promoter (<=1kb)    | ENSG00000268205 | -737  |
| chr19 | 57814561 | 57814920 | 360 | Promoter (<=1kb)    | ENSG00000268205 | -753  |
| chr19 | 57814852 | 57815211 | 360 | Promoter (<=1kb)    | ENSG00000268205 | -462  |
| chr19 | 57815186 | 57815581 | 396 | Promoter (<=1kb)    | ENSG00000268205 | -92   |
| chr19 | 57818259 | 57818654 | 396 | Promoter (2-3kb)    | ENSG00000268205 | 2586  |
| chr19 | 58380577 | 58380972 | 396 | Promoter (1-2kb)    | ENSG00000269867 | -1037 |
| chr19 | 58380584 | 58380943 | 360 | Promoter (1-2kb)    | ENSG00000269867 | -1044 |
| chr20 | 305876   | 306235   | 360 | Promoter (<=1kb)    | ENSG00000225377 | 0     |
| chr20 | 309597   | 309956   | 360 | Intron (ENST000004) | ENSG00000225377 | -3719 |
| chr20 | 309812   | 310171   | 360 | Intron (ENST000004) | ENSG00000225377 | -3934 |
| chr20 | 325529   | 325924   | 396 | Promoter (2-3kb)    | ENSG00000225377 | 2944  |
| chr20 | 326036   | 326431   | 396 | Promoter (2-3kb)    | ENSG00000225377 | 2437  |
| chr20 | 327318   | 327713   | 396 | Promoter (1-2kb)    | ENSG00000225377 | 1155  |
| chr20 | 327614   | 328009   | 396 | Promoter (<=1kb)    | ENSG00000225377 | 859   |
| chr20 | 327757   | 328116   | 360 | Promoter (<=1kb)    | ENSG00000225377 | 752   |
| chr20 | 327822   | 328217   | 396 | Promoter (<=1kb)    | ENSG00000225377 | 651   |
| chr20 | 328755   | 329150   | 396 | Promoter (<=1kb)    | ENSG00000225377 | 0     |
| chr20 | 2646961  | 2647356  | 396 | Promoter (1-2kb)    | ENSG00000228293 | 1963  |
| chr20 | 3089565  | 3089960  | 396 | Promoter (1-2kb)    | ENSG00000235958 | -1323 |
| chr20 | 3867092  | 3867487  | 396 | Promoter (2-3kb)    | ENSG00000229539 | 2028  |
| chr20 | 3867914  | 3868273  | 360 | Promoter (1-2kb)    | ENSG00000229539 | 1242  |
| chr20 | 3869716  | 3870075  | 360 | Promoter (<=1kb)    | ENSG00000229539 | -201  |
| chr20 | 3872983  | 3873342  | 360 | Distal Intergenic   | ENSG00000229539 | -3468 |
| chr20 | 4168342  | 4168737  | 396 | Distal Intergenic   | ENSG00000230176 | -4975 |
| chr20 | 4171443  | 4171838  | 396 | Promoter (1-2kb)    | ENSG00000230176 | -1874 |
| chr20 | 4171657  | 4172052  | 396 | Promoter (1-2kb)    | ENSG00000230176 | -1660 |
| chr20 | 4172450  | 4172845  | 396 | Promoter (<=1kb)    | ENSG00000230176 | -867  |
| chr20 | 4172484  | 4172843  | 360 | Promoter (<=1kb)    | ENSG00000230176 | -869  |
| chr20 | 4174176  | 4174535  | 360 | Promoter (<=1kb)    | ENSG00000230176 | 464   |
| chr20 | 5513502  | 5513861  | 360 | Promoter (<=1kb)    | ENSG00000235820 | -413  |
| chr20 | 5513746  | 5514141  | 396 | Promoter (<=1kb)    | ENSG00000235820 | -133  |
| chr20 | 6719597  | 6719992  | 396 | Promoter (2-3kb)    | ENSG00000228482 | -2814 |
| chr20 | 6720221  | 6720580  | 360 | Distal Intergenic   | ENSG00000228482 | -3438 |
| chr20 | 7046547  | 7046942  | 396 | Distal Intergenic   | ENSG00000232271 | -3319 |
| chr20 | 7285918  | 7286277  | 360 | Promoter (1-2kb)    | ENSG00000261249 | 1802  |
| chr20 | 7285974  | 7286369  | 396 | Promoter (1-2kb)    | ENSG00000261249 | 1710  |
| chr20 | 7286259  | 7286654  | 396 | Promoter (1-2kb)    | ENSG00000261249 | 1425  |
| chr20 | 7994713  | 7995072  | 360 | Distal Intergenic   | ENSG00000229766 | -4798 |
| chr20 | 8226369  | 8226728  | 360 | Promoter (2-3kb)    | ENSG00000225479 | -2623 |

|       |          |          |     |                     |                 |       |
|-------|----------|----------|-----|---------------------|-----------------|-------|
| chr20 | 9558745  | 9559140  | 396 | Promoter (2-3kb)    | ENSG00000232738 | 2490  |
| chr20 | 9558959  | 9559354  | 396 | Promoter (2-3kb)    | ENSG00000232738 | 2704  |
| chr20 | 10159392 | 10159787 | 396 | Promoter (1-2kb)    | ENSG00000232448 | -1096 |
| chr20 | 10352881 | 10353240 | 360 | Distal Intergenic   | ENSG00000227906 | -3457 |
| chr20 | 10625328 | 10625687 | 360 | Promoter (1-2kb)    | ENSG00000270408 | 1327  |
| chr20 | 10649678 | 10650037 | 360 | Distal Intergenic   | ENSG00000270792 | -3539 |
| chr20 | 10652164 | 10652523 | 360 | Promoter (1-2kb)    | ENSG00000270792 | -1053 |
| chr20 | 10732508 | 10732903 | 396 | Promoter (<=1kb)    | ENSG00000224961 | -835  |
| chr20 | 10733166 | 10733561 | 396 | Promoter (<=1kb)    | ENSG00000224961 | -177  |
| chr20 | 10733179 | 10733538 | 360 | Promoter (<=1kb)    | ENSG00000224961 | -200  |
| chr20 | 10733379 | 10733738 | 360 | Promoter (<=1kb)    | ENSG00000224961 | 0     |
| chr20 | 10736698 | 10737093 | 396 | Promoter (2-3kb)    | ENSG00000224961 | 2960  |
| chr20 | 10743192 | 10743587 | 396 | Promoter (2-3kb)    | ENSG00000234900 | 2347  |
| chr20 | 10743437 | 10743832 | 396 | Promoter (2-3kb)    | ENSG00000234900 | 2102  |
| chr20 | 10747730 | 10748125 | 396 | Promoter (1-2kb)    | ENSG00000234900 | -1796 |
| chr20 | 10749550 | 10749909 | 360 | Intron (ENST000006) | ENSG00000234900 | -3616 |
| chr20 | 10888463 | 10888858 | 396 | Promoter (1-2kb)    | ENSG00000232900 | 1062  |
| chr20 | 11792321 | 11792680 | 360 | Promoter (1-2kb)    | ENSG00000228422 | -1247 |
| chr20 | 11792524 | 11792883 | 360 | Promoter (1-2kb)    | ENSG00000228422 | -1450 |
| chr20 | 11792529 | 11792924 | 396 | Promoter (1-2kb)    | ENSG00000228422 | -1455 |
| chr20 | 11851890 | 11852249 | 360 | Promoter (<=1kb)    | ENSG00000228422 | -527  |
| chr20 | 12301124 | 12301483 | 360 | Distal Intergenic   | ENSG00000230437 | -3991 |
| chr20 | 12914410 | 12914769 | 360 | Promoter (1-2kb)    | ENSG00000269931 | 1662  |
| chr20 | 12914635 | 12915030 | 396 | Promoter (1-2kb)    | ENSG00000269931 | 1401  |
| chr20 | 12918943 | 12919302 | 360 | Promoter (2-3kb)    | ENSG00000269931 | -2512 |
| chr20 | 12919180 | 12919539 | 360 | Promoter (2-3kb)    | ENSG00000269931 | -2749 |
| chr20 | 12926616 | 12927011 | 396 | Intron (ENST000004) | ENSG00000234265 | -3975 |
| chr20 | 12928860 | 12929255 | 396 | Promoter (1-2kb)    | ENSG00000234265 | -1731 |
| chr20 | 12929076 | 12929471 | 396 | Promoter (1-2kb)    | ENSG00000234265 | -1515 |
| chr20 | 12936049 | 12936408 | 360 | Promoter (2-3kb)    | ENSG00000233048 | -2882 |
| chr20 | 13218693 | 13219052 | 360 | Promoter (1-2kb)    | ENSG00000226263 | 1269  |
| chr20 | 13218906 | 13219265 | 360 | Promoter (1-2kb)    | ENSG00000226263 | 1056  |
| chr20 | 13220244 | 13220639 | 396 | Promoter (<=1kb)    | ENSG00000226263 | 0     |
| chr20 | 13221566 | 13221961 | 396 | Promoter (1-2kb)    | ENSG00000226263 | -1245 |
| chr20 | 13223316 | 13223711 | 396 | Promoter (2-3kb)    | ENSG00000225956 | 2305  |
| chr20 | 13223516 | 13223911 | 396 | Promoter (2-3kb)    | ENSG00000225956 | 2105  |
| chr20 | 14605370 | 14605765 | 396 | Promoter (1-2kb)    | ENSG00000227927 | -1794 |
| chr20 | 14608299 | 14608694 | 396 | Promoter (<=1kb)    | ENSG00000227927 | 740   |
| chr20 | 14609466 | 14609861 | 396 | Promoter (1-2kb)    | ENSG00000227927 | 1907  |
| chr20 | 14907655 | 14908014 | 360 | Promoter (2-3kb)    | ENSG00000235914 | 2118  |
| chr20 | 14907859 | 14908254 | 396 | Promoter (1-2kb)    | ENSG00000235914 | 1878  |
| chr20 | 14907865 | 14908224 | 360 | Promoter (1-2kb)    | ENSG00000235914 | 1908  |
| chr20 | 14909617 | 14909976 | 360 | Promoter (<=1kb)    | ENSG00000235914 | 156   |
| chr20 | 14913614 | 14914009 | 396 | Promoter (1-2kb)    | ENSG00000237832 | 2000  |
| chr20 | 14917871 | 14918230 | 360 | Promoter (1-2kb)    | ENSG00000237832 | -1862 |
| chr20 | 16709159 | 16709554 | 396 | Promoter (2-3kb)    | ENSG00000228809 | 2039  |
| chr20 | 16712376 | 16712771 | 396 | Promoter (<=1kb)    | ENSG00000228809 | -783  |
| chr20 | 16714861 | 16715256 | 396 | Distal Intergenic   | ENSG00000228809 | -3268 |
| chr20 | 17872333 | 17872692 | 360 | Distal Intergenic   | ENSG00000233625 | -3529 |
| chr20 | 18035331 | 18035690 | 360 | Distal Intergenic   | ENSG00000229262 | -4447 |
| chr20 | 18297997 | 18298356 | 360 | Promoter (2-3kb)    | ENSG00000237259 | -2242 |
| chr20 | 18543655 | 18544014 | 360 | Distal Intergenic   | ENSG00000232388 | -4050 |
| chr20 | 18544340 | 18544699 | 360 | Distal Intergenic   | ENSG00000232388 | -3365 |
| chr20 | 19779853 | 19780212 | 360 | Promoter (<=1kb)    | ENSG00000233895 | -5    |
| chr20 | 20196675 | 20197070 | 396 | Promoter (<=1kb)    | ENSG00000225417 | -769  |
| chr20 | 20196795 | 20197154 | 360 | Promoter (<=1kb)    | ENSG00000225417 | -889  |
| chr20 | 20200112 | 20200507 | 396 | Distal Intergenic   | ENSG00000225417 | -4206 |
| chr20 | 20945842 | 20946237 | 396 | Distal Intergenic   | ENSG00000234104 | -4852 |

|       |          |          |     |                     |                 |       |
|-------|----------|----------|-----|---------------------|-----------------|-------|
| chr20 | 20949227 | 20949622 | 396 | Promoter (1-2kb)    | ENSG00000234104 | -1467 |
| chr20 | 20950913 | 20951308 | 396 | Promoter (<=1kb)    | ENSG00000234104 | 0     |
| chr20 | 21085521 | 21085880 | 360 | Promoter (1-2kb)    | ENSG00000225127 | 1095  |
| chr20 | 21090331 | 21090726 | 396 | Distal Intergenic   | ENSG00000225127 | -3332 |
| chr20 | 21090656 | 21091051 | 396 | Distal Intergenic   | ENSG00000225127 | -3657 |
| chr20 | 21101948 | 21102343 | 396 | Distal Intergenic   | ENSG00000088970 | -4281 |
| chr20 | 21103489 | 21103848 | 360 | Promoter (2-3kb)    | ENSG00000088970 | -2776 |
| chr20 | 21125655 | 21126014 | 360 | Promoter (<=1kb)    | ENSG00000088970 | 0     |
| chr20 | 21125928 | 21126323 | 396 | Promoter (<=1kb)    | ENSG00000088970 | 0     |
| chr20 | 21125972 | 21126331 | 360 | Promoter (<=1kb)    | ENSG00000088970 | 0     |
| chr20 | 21126481 | 21126876 | 396 | Promoter (<=1kb)    | ENSG00000088970 | 251   |
| chr20 | 21127118 | 21127513 | 396 | Promoter (<=1kb)    | ENSG00000088970 | 888   |
| chr20 | 21127188 | 21127547 | 360 | Promoter (<=1kb)    | ENSG00000088970 | 958   |
| chr20 | 21127885 | 21128244 | 360 | Promoter (1-2kb)    | ENSG00000088970 | 1655  |
| chr20 | 21138253 | 21138648 | 396 | Promoter (<=1kb)    | ENSG00000228604 | 734   |
| chr20 | 21139886 | 21140281 | 396 | Promoter (<=1kb)    | ENSG00000228604 | -504  |
| chr20 | 21140110 | 21140469 | 360 | Promoter (<=1kb)    | ENSG00000228604 | -728  |
| chr20 | 21140716 | 21141111 | 396 | Promoter (1-2kb)    | ENSG00000228604 | -1334 |
| chr20 | 21144822 | 21145217 | 396 | Promoter (1-2kb)    | ENSG00000228604 | -1291 |
| chr20 | 21147102 | 21147497 | 396 | Intron (ENST000005) | ENSG00000228604 | -3571 |
| chr20 | 21197402 | 21197761 | 360 | Promoter (1-2kb)    | ENSG00000232712 | 1142  |
| chr20 | 21199791 | 21200150 | 360 | Promoter (<=1kb)    | ENSG00000088970 | 689   |
| chr20 | 21220624 | 21220983 | 360 | Intron (ENST000004) | ENSG00000088970 | -4126 |
| chr20 | 21224997 | 21225392 | 396 | Promoter (<=1kb)    | ENSG00000088970 | 0     |
| chr20 | 21225627 | 21226022 | 396 | Promoter (<=1kb)    | ENSG00000088970 | 518   |
| chr20 | 21226246 | 21226641 | 396 | Promoter (1-2kb)    | ENSG00000088970 | 1137  |
| chr20 | 21506450 | 21506845 | 396 | Distal Intergenic   | ENSG00000233492 | -3995 |
| chr20 | 22260432 | 22260791 | 360 | Promoter (2-3kb)    | ENSG00000225321 | 2519  |
| chr20 | 22265314 | 22265673 | 360 | Promoter (2-3kb)    | ENSG00000225321 | -2004 |
| chr20 | 22265514 | 22265873 | 360 | Promoter (2-3kb)    | ENSG00000225321 | -2204 |
| chr20 | 22399269 | 22399628 | 360 | Promoter (1-2kb)    | ENSG00000204684 | 1653  |
| chr20 | 22403009 | 22403368 | 360 | Promoter (1-2kb)    | ENSG00000204684 | -1728 |
| chr20 | 22403537 | 22403932 | 396 | Promoter (2-3kb)    | ENSG00000204684 | -2256 |
| chr20 | 22539447 | 22539842 | 396 | Promoter (1-2kb)    | ENSG00000259974 | 1720  |
| chr20 | 22542233 | 22542592 | 360 | Promoter (<=1kb)    | ENSG00000259974 | -671  |
| chr20 | 22559818 | 22560177 | 360 | Promoter (<=1kb)    | ENSG00000259974 | -538  |
| chr20 | 22560018 | 22560377 | 360 | Promoter (<=1kb)    | ENSG00000259974 | -738  |
| chr20 | 22563052 | 22563447 | 396 | Distal Intergenic   | ENSG00000259974 | -3772 |
| chr20 | 22563233 | 22563592 | 360 | Distal Intergenic   | ENSG00000259974 | -3953 |
| chr20 | 22563308 | 22563703 | 396 | Distal Intergenic   | ENSG00000259974 | -4028 |
| chr20 | 22585213 | 22585608 | 396 | Promoter (2-3kb)    | ENSG00000237396 | 2547  |
| chr20 | 22585354 | 22585713 | 360 | Promoter (2-3kb)    | ENSG00000237396 | 2442  |
| chr20 | 22585555 | 22585914 | 360 | Promoter (2-3kb)    | ENSG00000237396 | 2241  |
| chr20 | 22586836 | 22587195 | 360 | Promoter (<=1kb)    | ENSG00000237396 | 960   |
| chr20 | 22586906 | 22587301 | 396 | Promoter (<=1kb)    | ENSG00000237396 | 854   |
| chr20 | 22587059 | 22587418 | 360 | Promoter (<=1kb)    | ENSG00000237396 | 737   |
| chr20 | 22587837 | 22588196 | 360 | Promoter (<=1kb)    | ENSG00000237396 | 0     |
| chr20 | 22667005 | 22667400 | 396 | Promoter (1-2kb)    | ENSG00000230400 | -1023 |
| chr20 | 22670282 | 22670641 | 360 | Distal Intergenic   | ENSG00000230400 | -4300 |
| chr20 | 23114981 | 23115376 | 396 | Promoter (1-2kb)    | ENSG00000233746 | -1723 |
| chr20 | 23115218 | 23115613 | 396 | Promoter (1-2kb)    | ENSG00000233746 | -1960 |
| chr20 | 23164481 | 23164840 | 360 | Distal Intergenic   | ENSG00000230387 | -3925 |
| chr20 | 23164574 | 23164969 | 396 | Distal Intergenic   | ENSG00000230387 | -3796 |
| chr20 | 23166111 | 23166470 | 360 | Promoter (2-3kb)    | ENSG00000230387 | -2295 |
| chr20 | 23336386 | 23336781 | 396 | Promoter (1-2kb)    | ENSG00000232645 | 1711  |
| chr20 | 23336579 | 23336938 | 360 | Promoter (1-2kb)    | ENSG00000232645 | 1554  |
| chr20 | 23336856 | 23337215 | 360 | Promoter (1-2kb)    | ENSG00000232645 | 1277  |
| chr20 | 23340656 | 23341051 | 396 | Promoter (1-2kb)    | ENSG00000232645 | -1903 |

|       |          |          |     |                   |                 |       |
|-------|----------|----------|-----|-------------------|-----------------|-------|
| chr20 | 23503044 | 23503403 | 360 | Distal Intergenic | ENSG00000260202 | -4338 |
| chr20 | 23635769 | 23636128 | 360 | Promoter (<=1kb)  | ENSG00000225056 | 899   |
| chr20 | 23637210 | 23637605 | 396 | Promoter (<=1kb)  | ENSG00000225056 | -183  |
| chr20 | 23637742 | 23638101 | 360 | Promoter (<=1kb)  | ENSG00000225056 | -715  |
| chr20 | 23637750 | 23638145 | 396 | Promoter (<=1kb)  | ENSG00000225056 | -723  |
| chr20 | 23640637 | 23641032 | 396 | Distal Intergenic | ENSG00000225056 | -3610 |
| chr20 | 23641312 | 23641671 | 360 | Distal Intergenic | ENSG00000225056 | -4285 |
| chr20 | 23642006 | 23642365 | 360 | Distal Intergenic | ENSG00000225056 | -4979 |
| chr20 | 25130525 | 25130884 | 360 | Promoter (<=1kb)  | ENSG00000230725 | -631  |
| chr20 | 25132635 | 25132994 | 360 | Promoter (2-3kb)  | ENSG00000230725 | -2741 |
| chr20 | 25603111 | 25603506 | 396 | Promoter (1-2kb)  | ENSG00000213742 | -1175 |
| chr20 | 25603622 | 25603981 | 360 | Promoter (<=1kb)  | ENSG00000213742 | -700  |
| chr20 | 25603821 | 25604216 | 396 | Promoter (<=1kb)  | ENSG00000213742 | -465  |
| chr20 | 25607059 | 25607454 | 396 | Promoter (2-3kb)  | ENSG00000213742 | 2190  |
| chr20 | 25611500 | 25611895 | 396 | Promoter (<=1kb)  | ENSG00000213742 | -951  |
| chr20 | 25611718 | 25612113 | 396 | Promoter (<=1kb)  | ENSG00000213742 | -733  |
| chr20 | 31446214 | 31446609 | 396 | Promoter (1-2kb)  | ENSG00000260257 | 1366  |
| chr20 | 31447695 | 31448054 | 360 | Promoter (2-3kb)  | ENSG00000260257 | 2847  |
| chr20 | 32244390 | 32244785 | 396 | Promoter (<=1kb)  | ENSG00000272521 | -108  |
| chr20 | 32245334 | 32245693 | 360 | Promoter (<=1kb)  | ENSG00000272521 | 441   |
| chr20 | 32262850 | 32263209 | 360 | Promoter (<=1kb)  | ENSG00000271803 | 527   |
| chr20 | 32263338 | 32263733 | 396 | Promoter (1-2kb)  | ENSG00000271803 | 1015  |
| chr20 | 32321043 | 32321402 | 360 | Promoter (1-2kb)  | ENSG00000229188 | -1409 |
| chr20 | 32323391 | 32323750 | 360 | Distal Intergenic | ENSG00000229188 | -3757 |
| chr20 | 32381781 | 32382140 | 360 | Promoter (<=1kb)  | ENSG00000230753 | -948  |
| chr20 | 32383413 | 32383772 | 360 | Promoter (2-3kb)  | ENSG00000230753 | -2580 |
| chr20 | 32383670 | 32384029 | 360 | Promoter (2-3kb)  | ENSG00000230753 | -2837 |
| chr20 | 32399683 | 32400078 | 396 | Promoter (<=1kb)  | ENSG00000230753 | -780  |
| chr20 | 32581873 | 32582232 | 360 | Promoter (<=1kb)  | ENSG00000228265 | 0     |
| chr20 | 32582499 | 32582894 | 396 | Promoter (<=1kb)  | ENSG00000228265 | -336  |
| chr20 | 32582735 | 32583130 | 396 | Promoter (<=1kb)  | ENSG00000228265 | -572  |
| chr20 | 32584569 | 32584928 | 360 | Promoter (2-3kb)  | ENSG00000228265 | -2406 |
| chr20 | 32604745 | 32605104 | 360 | Promoter (<=1kb)  | ENSG00000228386 | 451   |
| chr20 | 32605617 | 32606012 | 396 | Promoter (<=1kb)  | ENSG00000228386 | -62   |
| chr20 | 32605820 | 32606215 | 396 | Promoter (<=1kb)  | ENSG00000228386 | -265  |
| chr20 | 32606850 | 32607209 | 360 | Promoter (1-2kb)  | ENSG00000228386 | -1295 |
| chr20 | 32610424 | 32610783 | 360 | Distal Intergenic | ENSG00000228386 | -4869 |
| chr20 | 32663851 | 32664246 | 396 | Distal Intergenic | ENSG00000229472 | -4709 |
| chr20 | 32665094 | 32665489 | 396 | Distal Intergenic | ENSG00000229472 | -3466 |
| chr20 | 32665418 | 32665777 | 360 | Distal Intergenic | ENSG00000229472 | -3178 |
| chr20 | 32665673 | 32666032 | 360 | Promoter (2-3kb)  | ENSG00000229472 | -2923 |
| chr20 | 32666134 | 32666493 | 360 | Promoter (2-3kb)  | ENSG00000229472 | -2462 |
| chr20 | 32668695 | 32669090 | 396 | Promoter (<=1kb)  | ENSG00000229472 | 0     |
| chr20 | 33027824 | 33028183 | 360 | Promoter (1-2kb)  | ENSG00000236388 | 1647  |
| chr20 | 33035169 | 33035528 | 360 | Distal Intergenic | ENSG00000231795 | -3207 |
| chr20 | 33788252 | 33788611 | 360 | Promoter (2-3kb)  | ENSG00000269202 | 2480  |
| chr20 | 33789998 | 33790357 | 360 | Promoter (<=1kb)  | ENSG00000269202 | 734   |
| chr20 | 33792785 | 33793144 | 360 | Promoter (1-2kb)  | ENSG00000269202 | -1694 |
| chr20 | 33793676 | 33794035 | 360 | Promoter (2-3kb)  | ENSG00000269202 | -2585 |
| chr20 | 33859098 | 33859457 | 360 | Promoter (<=1kb)  | ENSG00000126005 | 402   |
| chr20 | 33862251 | 33862646 | 396 | Promoter (2-3kb)  | ENSG00000126005 | -2392 |
| chr20 | 33862463 | 33862858 | 396 | Promoter (2-3kb)  | ENSG00000126005 | -2604 |
| chr20 | 33862980 | 33863375 | 396 | Promoter (2-3kb)  | ENSG00000126005 | 2455  |
| chr20 | 33863232 | 33863627 | 396 | Promoter (2-3kb)  | ENSG00000126005 | 2203  |
| chr20 | 33867511 | 33867870 | 360 | Promoter (<=1kb)  | ENSG00000261582 | 0     |
| chr20 | 34081498 | 34081857 | 360 | Promoter (2-3kb)  | ENSG00000230155 | -2690 |
| chr20 | 34103013 | 34103408 | 396 | Distal Intergenic | ENSG00000268340 | -3274 |
| chr20 | 34103040 | 34103399 | 360 | Distal Intergenic | ENSG00000268340 | -3283 |



|       |          |          |     |                   |                 |       |
|-------|----------|----------|-----|-------------------|-----------------|-------|
| chr20 | 34103286 | 34103681 | 396 | Distal Intergenic | ENSG00000268340 | -3001 |
| chr20 | 34641793 | 34642152 | 360 | Promoter (2-3kb)  | ENSG00000260032 | -2911 |
| chr20 | 34674040 | 34674399 | 360 | Promoter (1-2kb)  | ENSG00000237063 | 1715  |
| chr20 | 34676998 | 34677357 | 360 | Promoter (<=1kb)  | ENSG00000237063 | -884  |
| chr20 | 34677200 | 34677559 | 360 | Promoter (1-2kb)  | ENSG00000237063 | -1086 |
| chr20 | 34743454 | 34743849 | 396 | Promoter (<=1kb)  | ENSG00000232406 | 0     |
| chr20 | 35199376 | 35199735 | 360 | Promoter (1-2kb)  | ENSG00000232907 | 1652  |
| chr20 | 35199862 | 35200257 | 396 | Promoter (1-2kb)  | ENSG00000232907 | 1130  |
| chr20 | 35200082 | 35200477 | 396 | Promoter (<=1kb)  | ENSG00000232907 | 910   |
| chr20 | 35200666 | 35201025 | 360 | Promoter (<=1kb)  | ENSG00000232907 | 362   |
| chr20 | 35232694 | 35233089 | 396 | Promoter (<=1kb)  | ENSG00000259716 | 0     |
| chr20 | 36248427 | 36248786 | 360 | Promoter (2-3kb)  | ENSG00000225759 | 2735  |
| chr20 | 36951824 | 36952183 | 360 | Promoter (2-3kb)  | ENSG00000206249 | 2755  |
| chr20 | 36951894 | 36952289 | 396 | Promoter (2-3kb)  | ENSG00000206249 | 2649  |
| chr20 | 36952105 | 36952500 | 396 | Promoter (2-3kb)  | ENSG00000206249 | 2438  |
| chr20 | 36953018 | 36953377 | 360 | Promoter (1-2kb)  | ENSG00000206249 | 1561  |
| chr20 | 36953178 | 36953573 | 396 | Promoter (1-2kb)  | ENSG00000206249 | 1365  |
| chr20 | 36953218 | 36953577 | 360 | Promoter (1-2kb)  | ENSG00000206249 | 1361  |
| chr20 | 36954885 | 36955280 | 396 | Promoter (<=1kb)  | ENSG00000206249 | 0     |
| chr20 | 36954931 | 36955290 | 360 | Promoter (<=1kb)  | ENSG00000206249 | 0     |
| chr20 | 36955090 | 36955485 | 396 | Promoter (<=1kb)  | ENSG00000206249 | -152  |
| chr20 | 36955134 | 36955493 | 360 | Promoter (<=1kb)  | ENSG00000206249 | -196  |
| chr20 | 36957405 | 36957764 | 360 | Promoter (2-3kb)  | ENSG00000206249 | -2467 |
| chr20 | 37055331 | 37055690 | 360 | Promoter (1-2kb)  | ENSG00000235408 | -1352 |
| chr20 | 37066723 | 37067118 | 396 | Promoter (2-3kb)  | ENSG00000196756 | -2727 |
| chr20 | 37066940 | 37067335 | 396 | Promoter (2-3kb)  | ENSG00000196756 | -2944 |
| chr20 | 37067803 | 37068162 | 360 | Distal Intergenic | ENSG00000196756 | -3807 |
| chr20 | 37078137 | 37078496 | 360 | Promoter (<=1kb)  | ENSG00000174365 | 883   |
| chr20 | 37078343 | 37078702 | 360 | Promoter (1-2kb)  | ENSG00000174365 | 1089  |
| chr20 | 37591243 | 37591638 | 396 | Promoter (<=1kb)  | ENSG00000261431 | -489  |
| chr20 | 37595007 | 37595402 | 396 | Distal Intergenic | ENSG00000261431 | -4253 |
| chr20 | 38628213 | 38628572 | 360 | Distal Intergenic | ENSG00000237767 | -4547 |
| chr20 | 38633377 | 38633772 | 396 | Promoter (<=1kb)  | ENSG00000237767 | 251   |
| chr20 | 38634461 | 38634820 | 360 | Promoter (1-2kb)  | ENSG00000237767 | 1335  |
| chr20 | 38654841 | 38655236 | 396 | Distal Intergenic | ENSG00000233415 | -4991 |
| chr20 | 38660947 | 38661342 | 396 | Promoter (<=1kb)  | ENSG00000233415 | 720   |
| chr20 | 38748285 | 38748680 | 396 | Promoter (1-2kb)  | ENSG00000223410 | -1002 |
| chr20 | 38748410 | 38748769 | 360 | Promoter (<=1kb)  | ENSG00000223410 | -913  |
| chr20 | 38751477 | 38751836 | 360 | Promoter (1-2kb)  | ENSG00000223410 | 1795  |
| chr20 | 38751562 | 38751957 | 396 | Promoter (1-2kb)  | ENSG00000223410 | 1880  |
| chr20 | 39325423 | 39325818 | 396 | Promoter (1-2kb)  | ENSG00000229771 | 1438  |
| chr20 | 39325675 | 39326070 | 396 | Promoter (1-2kb)  | ENSG00000229771 | 1186  |
| chr20 | 41316972 | 41317331 | 360 | Promoter (2-3kb)  | ENSG00000229042 | 2849  |
| chr20 | 41597590 | 41597985 | 396 | Promoter (<=1kb)  | ENSG00000227599 | 207   |
| chr20 | 42523910 | 42524269 | 360 | Promoter (<=1kb)  | ENSG00000233277 | 550   |
| chr20 | 42525736 | 42526131 | 396 | Promoter (2-3kb)  | ENSG00000233277 | 2376  |
| chr20 | 42841869 | 42842228 | 360 | Promoter (1-2kb)  | ENSG00000223891 | 1977  |
| chr20 | 43376212 | 43376571 | 360 | Promoter (1-2kb)  | ENSG00000244558 | -1550 |
| chr20 | 43591037 | 43591396 | 360 | Promoter (2-3kb)  | ENSG00000227477 | 2862  |
| chr20 | 43592402 | 43592797 | 396 | Promoter (1-2kb)  | ENSG00000227477 | 1461  |
| chr20 | 44116491 | 44116850 | 360 | Promoter (<=1kb)  | ENSG00000237464 | 238   |
| chr20 | 44117831 | 44118190 | 360 | Promoter (1-2kb)  | ENSG00000237464 | 1578  |
| chr20 | 44521790 | 44522149 | 360 | Promoter (<=1kb)  | ENSG00000271984 | 0     |
| chr20 | 44521992 | 44522387 | 396 | Promoter (<=1kb)  | ENSG00000271984 | 0     |
| chr20 | 44524420 | 44524779 | 360 | Promoter (2-3kb)  | ENSG00000271984 | -2362 |
| chr20 | 44524756 | 44525115 | 360 | Promoter (2-3kb)  | ENSG00000271984 | -2698 |
| chr20 | 44526192 | 44526587 | 396 | Distal Intergenic | ENSG00000271984 | -4134 |
| chr20 | 44651689 | 44652084 | 396 | Promoter (<=1kb)  | ENSG00000204044 | -977  |

|       |          |          |     |                    |                 |       |
|-------|----------|----------|-----|--------------------|-----------------|-------|
| chr20 | 44652356 | 44652751 | 396 | Promoter (1-2kb)   | ENSG00000204044 | -1644 |
| chr20 | 44652444 | 44652803 | 360 | Promoter (1-2kb)   | ENSG00000204044 | -1732 |
| chr20 | 44655235 | 44655594 | 360 | Distal Intergenic  | ENSG00000204044 | -4523 |
| chr20 | 44799935 | 44800294 | 360 | Promoter (<=1kb)   | ENSG00000229957 | -59   |
| chr20 | 45319216 | 45319611 | 396 | Promoter (<=1kb)   | ENSG00000271784 | 918   |
| chr20 | 45533024 | 45533383 | 360 | Promoter (2-3kb)   | ENSG00000236028 | -2659 |
| chr20 | 46040884 | 46041279 | 396 | Promoter (<=1kb)   | ENSG00000224565 | 0     |
| chr20 | 46040935 | 46041294 | 360 | Promoter (<=1kb)   | ENSG00000224565 | 0     |
| chr20 | 46306099 | 46306458 | 360 | Promoter (<=1kb)   | ENSG00000255438 | -187  |
| chr20 | 46307079 | 46307474 | 396 | Promoter (<=1kb)   | ENSG00000255438 | 434   |
| chr20 | 46308343 | 46308738 | 396 | Promoter (1-2kb)   | ENSG00000255438 | 1698  |
| chr20 | 46581543 | 46581938 | 396 | Promoter (1-2kb)   | ENSG00000234967 | 2000  |
| chr20 | 46581744 | 46582139 | 396 | Promoter (2-3kb)   | ENSG00000234967 | 2201  |
| chr20 | 46583710 | 46584069 | 360 | Promoter (2-3kb)   | ENSG00000228503 | -2697 |
| chr20 | 46584517 | 46584912 | 396 | Promoter (1-2kb)   | ENSG00000228503 | -1854 |
| chr20 | 46584731 | 46585126 | 396 | Promoter (1-2kb)   | ENSG00000228503 | -1640 |
| chr20 | 46606848 | 46607243 | 396 | Downstream (1-2kb) | ENSG00000229522 | -4905 |
| chr20 | 46618277 | 46618636 | 360 | Promoter (<=1kb)   | ENSG00000237423 | -789  |
| chr20 | 47664596 | 47664991 | 396 | Promoter (2-3kb)   | ENSG00000227431 | -2015 |
| chr20 | 48657494 | 48657889 | 396 | Promoter (<=1kb)   | ENSG00000231265 | 152   |
| chr20 | 48657582 | 48657941 | 360 | Promoter (<=1kb)   | ENSG00000231265 | 100   |
| chr20 | 48657807 | 48658202 | 396 | Promoter (<=1kb)   | ENSG00000231265 | 0     |
| chr20 | 48657820 | 48658179 | 360 | Promoter (<=1kb)   | ENSG00000231265 | 0     |
| chr20 | 48788983 | 48789342 | 360 | Promoter (<=1kb)   | ENSG00000231742 | 0     |
| chr20 | 48789028 | 48789423 | 396 | Promoter (<=1kb)   | ENSG00000231742 | 0     |
| chr20 | 48889286 | 48889645 | 360 | Intron (ENST000004 | ENSG00000224397 | -3209 |
| chr20 | 48890377 | 48890736 | 360 | Promoter (2-3kb)   | ENSG00000224397 | -2118 |
| chr20 | 48904541 | 48904900 | 360 | Distal Intergenic  | ENSG00000203999 | -4357 |
| chr20 | 48904747 | 48905106 | 360 | Distal Intergenic  | ENSG00000203999 | -4151 |
| chr20 | 48922921 | 48923316 | 396 | Intron (ENST000003 | ENSG00000203999 | -4195 |
| chr20 | 48924672 | 48925031 | 360 | Promoter (2-3kb)   | ENSG00000203999 | -2480 |
| chr20 | 48927937 | 48928332 | 396 | Promoter (<=1kb)   | ENSG00000203999 | 426   |
| chr20 | 48938948 | 48939307 | 360 | Promoter (1-2kb)   | ENSG00000233077 | -1069 |
| chr20 | 48939810 | 48940205 | 396 | Promoter (1-2kb)   | ENSG00000233077 | -1931 |
| chr20 | 48942530 | 48942925 | 396 | Distal Intergenic  | ENSG00000233077 | -4651 |
| chr20 | 49195580 | 49195939 | 360 | Promoter (1-2kb)   | ENSG00000232043 | -1002 |
| chr20 | 49258367 | 49258726 | 360 | Distal Intergenic  | ENSG00000234693 | -3282 |
| chr20 | 49266021 | 49266416 | 396 | Intron (ENST000004 | ENSG00000234693 | -3323 |
| chr20 | 49266138 | 49266497 | 360 | Intron (ENST000004 | ENSG00000234693 | -3242 |
| chr20 | 49610811 | 49611206 | 396 | Distal Intergenic  | ENSG00000232358 | -4701 |
| chr20 | 49610830 | 49611189 | 360 | Distal Intergenic  | ENSG00000232358 | -4718 |
| chr20 | 49611074 | 49611469 | 396 | Distal Intergenic  | ENSG00000232358 | -4438 |
| chr20 | 49612146 | 49612541 | 396 | Distal Intergenic  | ENSG00000232358 | -3366 |
| chr20 | 49612189 | 49612548 | 360 | Distal Intergenic  | ENSG00000232358 | -3359 |
| chr20 | 49614589 | 49614984 | 396 | Promoter (<=1kb)   | ENSG00000232358 | -923  |
| chr20 | 49614599 | 49614958 | 360 | Promoter (<=1kb)   | ENSG00000232358 | -949  |
| chr20 | 50476175 | 50476534 | 360 | Promoter (2-3kb)   | ENSG00000227964 | 2917  |
| chr20 | 50476419 | 50476778 | 360 | Promoter (2-3kb)   | ENSG00000227964 | 2673  |
| chr20 | 50478306 | 50478701 | 396 | Promoter (<=1kb)   | ENSG00000227964 | 750   |
| chr20 | 50478396 | 50478755 | 360 | Promoter (<=1kb)   | ENSG00000227964 | 696   |
| chr20 | 50478605 | 50478964 | 360 | Promoter (<=1kb)   | ENSG00000227964 | 487   |
| chr20 | 50483148 | 50483507 | 360 | Distal Intergenic  | ENSG00000227964 | -3697 |
| chr20 | 50483311 | 50483706 | 396 | Distal Intergenic  | ENSG00000227964 | -3860 |
| chr20 | 50483365 | 50483724 | 360 | Distal Intergenic  | ENSG00000227964 | -3914 |
| chr20 | 51119233 | 51119592 | 360 | Promoter (2-3kb)   | ENSG00000232465 | -2103 |
| chr20 | 51482593 | 51482988 | 396 | Distal Intergenic  | ENSG00000232286 | -3199 |
| chr20 | 51793305 | 51793700 | 396 | Promoter (2-3kb)   | ENSG00000223492 | 2389  |
| chr20 | 51800096 | 51800491 | 396 | Distal Intergenic  | ENSG00000223492 | -4007 |

|       |          |          |     |                     |                 |       |
|-------|----------|----------|-----|---------------------|-----------------|-------|
| chr20 | 51826551 | 51826910 | 360 | Promoter (1-2kb)    | ENSG00000227705 | -1307 |
| chr20 | 52030926 | 52031321 | 396 | Promoter (1-2kb)    | ENSG00000231703 | -1478 |
| chr20 | 52031775 | 52032170 | 396 | Promoter (2-3kb)    | ENSG00000231703 | -2327 |
| chr20 | 52107339 | 52107698 | 360 | Intron (ENST000005) | ENSG00000271774 | -3526 |
| chr20 | 52221400 | 52221759 | 360 | Distal Intergenic   | ENSG00000235415 | -3134 |
| chr20 | 52223843 | 52224202 | 360 | Promoter (<=1kb)    | ENSG00000235415 | -691  |
| chr20 | 52224046 | 52224405 | 360 | Promoter (<=1kb)    | ENSG00000235415 | -488  |
| chr20 | 52420649 | 52421044 | 396 | Promoter (2-3kb)    | ENSG00000225563 | -2792 |
| chr20 | 54043521 | 54043880 | 360 | Promoter (<=1kb)    | ENSG00000224008 | 0     |
| chr20 | 54045110 | 54045505 | 396 | Promoter (1-2kb)    | ENSG00000224008 | -1375 |
| chr20 | 55790714 | 55791073 | 360 | Promoter (<=1kb)    | ENSG00000235032 | 786   |
| chr20 | 56178410 | 56178769 | 360 | Promoter (2-3kb)    | ENSG00000227297 | -2154 |
| chr20 | 56643988 | 56644383 | 396 | Promoter (2-3kb)    | ENSG00000225708 | 2733  |
| chr20 | 56644210 | 56644605 | 396 | Promoter (2-3kb)    | ENSG00000225708 | 2511  |
| chr20 | 57091896 | 57092291 | 396 | Promoter (1-2kb)    | ENSG00000231290 | 1113  |
| chr20 | 57100469 | 57100828 | 360 | Promoter (2-3kb)    | ENSG00000231290 | 2253  |
| chr20 | 57288598 | 57288957 | 360 | Promoter (2-3kb)    | ENSG00000254419 | 2747  |
| chr20 | 57326543 | 57326938 | 396 | Promoter (2-3kb)    | ENSG00000270279 | -2469 |
| chr20 | 57326586 | 57326945 | 360 | Promoter (2-3kb)    | ENSG00000270279 | -2462 |
| chr20 | 57390151 | 57390546 | 396 | Promoter (2-3kb)    | ENSG00000268649 | 2203  |
| chr20 | 57390462 | 57390857 | 396 | Promoter (1-2kb)    | ENSG00000268649 | 1892  |
| chr20 | 57390718 | 57391113 | 396 | Promoter (1-2kb)    | ENSG00000268649 | 1636  |
| chr20 | 57390947 | 57391342 | 396 | Promoter (1-2kb)    | ENSG00000268649 | 1407  |
| chr20 | 57424638 | 57424997 | 360 | Promoter (<=1kb)    | ENSG00000235590 | 936   |
| chr20 | 57429993 | 57430352 | 360 | Distal Intergenic   | ENSG00000235590 | -4035 |
| chr20 | 57456946 | 57457305 | 360 | Promoter (2-3kb)    | ENSG00000225806 | 2731  |
| chr20 | 57457108 | 57457503 | 396 | Promoter (2-3kb)    | ENSG00000225806 | 2533  |
| chr20 | 57468612 | 57468971 | 360 | Distal Intergenic   | ENSG00000225806 | -4748 |
| chr20 | 57939353 | 57939712 | 360 | Promoter (<=1kb)    | ENSG00000230352 | 116   |
| chr20 | 58087268 | 58087627 | 360 | Promoter (2-3kb)    | ENSG00000227282 | -2619 |
| chr20 | 58662770 | 58663129 | 360 | Promoter (<=1kb)    | ENSG00000228340 | 0     |
| chr20 | 58663556 | 58663915 | 360 | Promoter (<=1kb)    | ENSG00000228340 | 0     |
| chr20 | 58695283 | 58695642 | 360 | Promoter (<=1kb)    | ENSG00000228340 | -474  |
| chr20 | 58716326 | 58716721 | 396 | Promoter (2-3kb)    | ENSG00000228340 | 2778  |
| chr20 | 59393656 | 59394015 | 360 | Distal Intergenic   | ENSG00000261035 | -4389 |
| chr20 | 61174380 | 61174775 | 396 | Promoter (1-2kb)    | ENSG00000264490 | 1576  |
| chr20 | 61259814 | 61260173 | 360 | Distal Intergenic   | ENSG00000229882 | -4951 |
| chr20 | 61371329 | 61371688 | 360 | Distal Intergenic   | ENSG00000223669 | -4630 |
| chr20 | 61665883 | 61666242 | 360 | Promoter (1-2kb)    | ENSG00000125514 | 1463  |
| chr20 | 61991755 | 61992114 | 360 | Promoter (<=1kb)    | ENSG00000203900 | 415   |
| chr20 | 61997933 | 61998292 | 360 | Promoter (1-2kb)    | ENSG00000203900 | -1942 |
| chr20 | 62076007 | 62076366 | 360 | Distal Intergenic   | ENSG00000226390 | -3038 |
| chr20 | 62076226 | 62076621 | 396 | Promoter (2-3kb)    | ENSG00000226390 | -2783 |
| chr20 | 62134922 | 62135281 | 360 | Promoter (1-2kb)    | ENSG00000230226 | 1282  |
| chr20 | 62135413 | 62135808 | 396 | Promoter (1-2kb)    | ENSG00000230226 | 1773  |
| chr20 | 62255491 | 62255850 | 360 | Promoter (2-3kb)    | ENSG00000232442 | -2730 |
| chr20 | 62256121 | 62256516 | 396 | Promoter (2-3kb)    | ENSG00000232442 | -2064 |
| chr20 | 62256389 | 62256748 | 360 | Promoter (1-2kb)    | ENSG00000232442 | -1832 |
| chr20 | 62259522 | 62259881 | 360 | Promoter (<=1kb)    | ENSG00000232442 | 919   |
| chr20 | 62370895 | 62371254 | 360 | Distal Intergenic   | ENSG00000229299 | -4788 |
| chr20 | 62374247 | 62374606 | 360 | Promoter (1-2kb)    | ENSG00000229299 | -1436 |
| chr20 | 62375374 | 62375733 | 360 | Promoter (<=1kb)    | ENSG00000229299 | -309  |
| chr20 | 62376331 | 62376690 | 360 | Promoter (<=1kb)    | ENSG00000229299 | -209  |
| chr20 | 62376489 | 62376884 | 396 | Promoter (<=1kb)    | ENSG00000229299 | -15   |
| chr20 | 62376530 | 62376889 | 360 | Promoter (<=1kb)    | ENSG00000229299 | -10   |
| chr20 | 62376697 | 62377092 | 396 | Promoter (<=1kb)    | ENSG00000229299 | 0     |
| chr20 | 62441112 | 62441471 | 360 | Promoter (1-2kb)    | ENSG00000231208 | 1683  |
| chr20 | 62442154 | 62442513 | 360 | Promoter (2-3kb)    | ENSG00000231208 | 2725  |

|       |          |          |     |                      |                 |       |
|-------|----------|----------|-----|----------------------|-----------------|-------|
| chr20 | 62663693 | 62664088 | 396 | Promoter (1-2kb)     | ENSG00000196421 | -1609 |
| chr20 | 62664196 | 62664591 | 396 | Promoter (1-2kb)     | ENSG00000196421 | -1106 |
| chr20 | 62664999 | 62665394 | 396 | Promoter (<=1kb)     | ENSG00000196421 | -303  |
| chr20 | 62666896 | 62667255 | 360 | Promoter (<=1kb)     | ENSG00000196421 | 0     |
| chr20 | 62667136 | 62667531 | 396 | Promoter (<=1kb)     | ENSG00000196421 | 120   |
| chr20 | 62667753 | 62668112 | 360 | Promoter (<=1kb)     | ENSG00000196421 | 737   |
| chr20 | 62668467 | 62668862 | 396 | Promoter (<=1kb)     | ENSG00000196421 | -623  |
| chr20 | 62672049 | 62672408 | 360 | Promoter (2-3kb)     | ENSG00000196421 | 2556  |
| chr20 | 62688651 | 62689010 | 360 | Promoter (<=1kb)     | ENSG00000237371 | 495   |
| chr20 | 62690278 | 62690637 | 360 | Promoter (2-3kb)     | ENSG00000237371 | 2122  |
| chr20 | 62690508 | 62690867 | 360 | Promoter (2-3kb)     | ENSG00000237371 | 2352  |
| chr20 | 62916559 | 62916918 | 360 | Distal Intergenic    | ENSG00000149656 | -4820 |
| chr20 | 62916761 | 62917120 | 360 | Distal Intergenic    | ENSG00000149656 | -4618 |
| chr20 | 62918643 | 62919002 | 360 | Promoter (2-3kb)     | ENSG00000149656 | -2736 |
| chr20 | 62922732 | 62923091 | 360 | Promoter (<=1kb)     | ENSG00000149656 | 994   |
| chr20 | 62923011 | 62923370 | 360 | Promoter (1-2kb)     | ENSG00000149656 | 1273  |
| chr20 | 62925343 | 62925738 | 396 | Promoter (<=1kb)     | ENSG00000149656 | -512  |
| chr20 | 62925664 | 62926059 | 396 | Promoter (<=1kb)     | ENSG00000149656 | -191  |
| chr20 | 62926375 | 62926734 | 360 | Promoter (<=1kb)     | ENSG00000149656 | 81    |
| chr20 | 62926825 | 62927184 | 360 | Promoter (<=1kb)     | ENSG00000149656 | 531   |
| chr20 | 62928293 | 62928652 | 360 | Promoter (1-2kb)     | ENSG00000149656 | 1999  |
| chr21 | 14387029 | 14387424 | 396 | Promoter (1-2kb)     | ENSG00000229306 | 1589  |
| chr21 | 15139233 | 15139628 | 396 | Promoter (2-3kb)     | ENSG00000224922 | -2625 |
| chr21 | 15139767 | 15140162 | 396 | Promoter (2-3kb)     | ENSG00000224922 | -2091 |
| chr21 | 15139978 | 15140373 | 396 | Promoter (1-2kb)     | ENSG00000224922 | -1880 |
| chr21 | 15140565 | 15140960 | 396 | Promoter (1-2kb)     | ENSG00000224922 | -1293 |
| chr21 | 15140738 | 15141097 | 360 | Promoter (1-2kb)     | ENSG00000224922 | -1156 |
| chr21 | 15401242 | 15401637 | 396 | Promoter (1-2kb)     | ENSG00000224905 | 1470  |
| chr21 | 16293595 | 16293954 | 360 | Promoter (2-3kb)     | ENSG00000235277 | 2740  |
| chr21 | 17441217 | 17441612 | 396 | Promoter (1-2kb)     | ENSG00000215386 | -1230 |
| chr21 | 17601312 | 17601707 | 396 | Promoter (1-2kb)     | ENSG00000215386 | -1692 |
| chr21 | 26215741 | 26216100 | 360 | Promoter (2-3kb)     | ENSG00000226983 | 2877  |
| chr21 | 26427208 | 26427567 | 360 | Promoter (<=1kb)     | ENSG00000244278 | -281  |
| chr21 | 27829482 | 27829841 | 360 | Promoter (2-3kb)     | ENSG00000273115 | 2692  |
| chr21 | 28256980 | 28257339 | 360 | Distal Intergenic    | ENSG00000223563 | -4356 |
| chr21 | 28258073 | 28258432 | 360 | Distal Intergenic    | ENSG00000223563 | -3263 |
| chr21 | 29089893 | 29090252 | 360 | Distal Intergenic    | ENSG00000225298 | -4446 |
| chr21 | 29499729 | 29500088 | 360 | Promoter (2-3kb)     | ENSG00000232079 | -2350 |
| chr21 | 30436590 | 30436985 | 396 | Distal Intergenic    | ENSG00000231125 | -4174 |
| chr21 | 33645009 | 33645368 | 360 | Distal Intergenic    | ENSG00000227256 | -4806 |
| chr21 | 33645596 | 33645991 | 396 | Distal Intergenic    | ENSG00000227256 | -4183 |
| chr21 | 33685867 | 33686262 | 396 | Distal Intergenic    | ENSG00000232623 | -4819 |
| chr21 | 33947374 | 33947769 | 396 | Promoter (<=1kb)     | ENSG00000186842 | 422   |
| chr21 | 34103246 | 34103641 | 396 | Promoter (<=1kb)     | ENSG00000238197 | 583   |
| chr21 | 34224201 | 34224596 | 396 | Promoter (1-2kb)     | ENSG00000232360 | -1957 |
| chr21 | 34225323 | 34225718 | 396 | Distal Intergenic    | ENSG00000232360 | -3079 |
| chr21 | 34326557 | 34326916 | 360 | Intron (ENST000004:) | ENSG00000228961 | -4280 |
| chr21 | 34526851 | 34527246 | 396 | Promoter (1-2kb)     | ENSG00000226433 | -1692 |
| chr21 | 35286137 | 35286532 | 396 | Promoter (1-2kb)     | ENSG00000237945 | -1306 |
| chr21 | 35339728 | 35340123 | 396 | Promoter (<=1kb)     | ENSG00000237945 | 402   |
| chr21 | 37102674 | 37103069 | 396 | Promoter (2-3kb)     | ENSG00000230794 | 2171  |
| chr21 | 37102893 | 37103288 | 396 | Promoter (1-2kb)     | ENSG00000230794 | 1952  |
| chr21 | 37104565 | 37104924 | 360 | Promoter (<=1kb)     | ENSG00000230794 | 316   |
| chr21 | 37377139 | 37377534 | 396 | Promoter (<=1kb)     | ENSG00000231106 | -102  |
| chr21 | 37429706 | 37430101 | 396 | Promoter (2-3kb)     | ENSG00000236677 | -2629 |
| chr21 | 37430997 | 37431356 | 360 | Promoter (1-2kb)     | ENSG00000236677 | -1374 |
| chr21 | 37501543 | 37501902 | 360 | Promoter (2-3kb)     | ENSG00000230212 | -2605 |
| chr21 | 38336922 | 38337317 | 396 | Promoter (1-2kb)     | ENSG00000224790 | -1495 |

|       |          |          |     |                   |                 |       |
|-------|----------|----------|-----|-------------------|-----------------|-------|
| chr21 | 38467879 | 38468238 | 360 | Distal Intergenic | ENSG00000270116 | -4876 |
| chr21 | 38469389 | 38469784 | 396 | Distal Intergenic | ENSG00000270116 | -3330 |
| chr21 | 39091188 | 39091547 | 360 | Promoter (<=1kb)  | ENSG00000233213 | 325   |
| chr21 | 39093622 | 39093981 | 360 | Promoter (1-2kb)  | ENSG00000233213 | -1750 |
| chr21 | 39094418 | 39094777 | 360 | Promoter (2-3kb)  | ENSG00000233213 | -2546 |
| chr21 | 39095058 | 39095417 | 360 | Distal Intergenic | ENSG00000233213 | -3186 |
| chr21 | 39095089 | 39095484 | 396 | Distal Intergenic | ENSG00000233213 | -3217 |
| chr21 | 39096870 | 39097265 | 396 | Distal Intergenic | ENSG00000233213 | -4998 |
| chr21 | 39380287 | 39380682 | 396 | Promoter (2-3kb)  | ENSG00000223608 | 2238  |
| chr21 | 39380555 | 39380950 | 396 | Promoter (1-2kb)  | ENSG00000223608 | 1970  |
| chr21 | 39385745 | 39386104 | 360 | Promoter (2-3kb)  | ENSG00000223608 | -2825 |
| chr21 | 39579239 | 39579634 | 396 | Promoter (<=1kb)  | ENSG00000233316 | -595  |
| chr21 | 41750190 | 41750549 | 360 | Distal Intergenic | ENSG00000235123 | -4461 |
| chr21 | 41752023 | 41752418 | 396 | Promoter (2-3kb)  | ENSG00000235123 | -2592 |
| chr21 | 41756580 | 41756939 | 360 | Promoter (1-2kb)  | ENSG00000235123 | 1570  |
| chr21 | 42005407 | 42005766 | 360 | Promoter (2-3kb)  | ENSG00000233756 | -2714 |
| chr21 | 42561188 | 42561547 | 360 | Promoter (2-3kb)  | ENSG00000225745 | -2473 |
| chr21 | 42561892 | 42562287 | 396 | Distal Intergenic | ENSG00000225745 | -3177 |
| chr21 | 42562093 | 42562488 | 396 | Distal Intergenic | ENSG00000225745 | -3378 |
| chr21 | 42936872 | 42937231 | 360 | Promoter (1-2kb)  | ENSG00000232806 | -1987 |
| chr21 | 42937076 | 42937435 | 360 | Promoter (2-3kb)  | ENSG00000232806 | -2191 |
| chr21 | 43287984 | 43288379 | 396 | Promoter (2-3kb)  | ENSG00000236545 | -2363 |
| chr21 | 43288245 | 43288640 | 396 | Promoter (2-3kb)  | ENSG00000236545 | -2102 |
| chr21 | 43288509 | 43288904 | 396 | Promoter (1-2kb)  | ENSG00000236545 | -1838 |
| chr21 | 43299857 | 43300252 | 396 | Promoter (2-3kb)  | ENSG00000227698 | -2135 |
| chr21 | 43300097 | 43300492 | 396 | Promoter (2-3kb)  | ENSG00000227698 | -2375 |
| chr21 | 43300706 | 43301065 | 360 | Promoter (2-3kb)  | ENSG00000227698 | -2984 |
| chr21 | 43300822 | 43301217 | 396 | Distal Intergenic | ENSG00000227698 | -3100 |
| chr21 | 43931367 | 43931726 | 360 | Promoter (2-3kb)  | ENSG00000231867 | 2623  |
| chr21 | 43984709 | 43985068 | 360 | Promoter (2-3kb)  | ENSG00000235772 | -2665 |
| chr21 | 44347856 | 44348215 | 360 | Promoter (2-3kb)  | ENSG00000233056 | -2100 |
| chr21 | 44348059 | 44348418 | 360 | Promoter (2-3kb)  | ENSG00000233056 | -2303 |
| chr21 | 44861162 | 44861521 | 360 | Distal Intergenic | ENSG00000188660 | -4960 |
| chr21 | 44869807 | 44870166 | 360 | Promoter (<=1kb)  | ENSG00000188660 | 0     |
| chr21 | 44870260 | 44870655 | 396 | Promoter (<=1kb)  | ENSG00000188660 | 356   |
| chr21 | 44871046 | 44871405 | 360 | Promoter (1-2kb)  | ENSG00000188660 | 1142  |
| chr21 | 44872122 | 44872517 | 396 | Promoter (2-3kb)  | ENSG00000188660 | 2218  |
| chr21 | 44872888 | 44873283 | 396 | Promoter (2-3kb)  | ENSG00000188660 | 2984  |
| chr21 | 44886856 | 44887215 | 360 | Promoter (1-2kb)  | ENSG00000223975 | 1667  |
| chr21 | 44890493 | 44890888 | 396 | Promoter (<=1kb)  | ENSG00000185186 | 584   |
| chr21 | 45750827 | 45751222 | 396 | Promoter (<=1kb)  | ENSG00000184441 | 0     |
| chr21 | 46225204 | 46225599 | 396 | Promoter (2-3kb)  | ENSG00000236519 | 2712  |
| chr22 | 16277421 | 16277780 | 360 | Promoter (2-3kb)  | ENSG00000236666 | 2861  |
| chr22 | 17127632 | 17128027 | 396 | Promoter (1-2kb)  | ENSG00000100181 | -1671 |
| chr22 | 17562887 | 17563282 | 396 | Promoter (1-2kb)  | ENSG00000273442 | 1296  |
| chr22 | 17638469 | 17638864 | 396 | Promoter (1-2kb)  | ENSG00000185837 | -1410 |
| chr22 | 17639034 | 17639429 | 396 | Promoter (<=1kb)  | ENSG00000185837 | -845  |
| chr22 | 17639296 | 17639691 | 396 | Promoter (<=1kb)  | ENSG00000185837 | -583  |
| chr22 | 18032562 | 18032957 | 396 | Distal Intergenic | ENSG00000272675 | -3293 |
| chr22 | 18075868 | 18076227 | 360 | Distal Intergenic | ENSG00000236754 | -3910 |
| chr22 | 18075903 | 18076298 | 396 | Distal Intergenic | ENSG00000236754 | -3945 |
| chr22 | 19109507 | 19109902 | 396 | Promoter (<=1kb)  | ENSG00000223461 | 465   |
| chr22 | 19115946 | 19116341 | 396 | Promoter (<=1kb)  | ENSG00000272682 | 0     |
| chr22 | 19161704 | 19162063 | 360 | Promoter (2-3kb)  | ENSG00000260924 | 2796  |
| chr22 | 19432270 | 19432665 | 396 | Promoter (2-3kb)  | ENSG00000185065 | -2751 |
| chr22 | 19433273 | 19433668 | 396 | Promoter (1-2kb)  | ENSG00000185065 | -1748 |
| chr22 | 19433287 | 19433646 | 360 | Promoter (1-2kb)  | ENSG00000185065 | -1770 |
| chr22 | 19433487 | 19433846 | 360 | Promoter (1-2kb)  | ENSG00000185065 | -1570 |

|       |          |          |     |                   |                 |       |
|-------|----------|----------|-----|-------------------|-----------------|-------|
| chr22 | 20323349 | 20323708 | 360 | Promoter (2-3kb)  | ENSG00000188424 | -2620 |
| chr22 | 21665832 | 21666191 | 360 | Promoter (1-2kb)  | ENSG00000237407 | -1018 |
| chr22 | 21665945 | 21666340 | 396 | Promoter (<=1kb)  | ENSG00000237407 | -869  |
| chr22 | 21666144 | 21666539 | 396 | Promoter (<=1kb)  | ENSG00000237407 | -670  |
| chr22 | 21816797 | 21817192 | 396 | Distal Intergenic | ENSG00000206140 | -3520 |
| chr22 | 22387060 | 22387455 | 396 | Distal Intergenic | ENSG00000225070 | -3288 |
| chr22 | 22387076 | 22387435 | 360 | Distal Intergenic | ENSG00000225070 | -3308 |
| chr22 | 22388437 | 22388796 | 360 | Promoter (1-2kb)  | ENSG00000225070 | -1947 |
| chr22 | 22389485 | 22389844 | 360 | Promoter (<=1kb)  | ENSG00000225070 | -899  |
| chr22 | 23036224 | 23036583 | 360 | Promoter (<=1kb)  | ENSG00000223999 | -427  |
| chr22 | 23036445 | 23036804 | 360 | Promoter (<=1kb)  | ENSG00000223999 | -648  |
| chr22 | 23773646 | 23774005 | 360 | Promoter (1-2kb)  | ENSG00000234928 | -1746 |
| chr22 | 23773821 | 23774216 | 396 | Promoter (1-2kb)  | ENSG00000234928 | -1535 |
| chr22 | 23773860 | 23774219 | 360 | Promoter (1-2kb)  | ENSG00000234928 | -1532 |
| chr22 | 23774137 | 23774532 | 396 | Promoter (1-2kb)  | ENSG00000234928 | -1219 |
| chr22 | 23826064 | 23826459 | 396 | Promoter (2-3kb)  | ENSG00000178248 | 2634  |
| chr22 | 23826085 | 23826444 | 360 | Promoter (2-3kb)  | ENSG00000178248 | 2649  |
| chr22 | 23857654 | 23858049 | 396 | Promoter (1-2kb)  | ENSG00000225413 | -1865 |
| chr22 | 23857799 | 23858158 | 360 | Promoter (2-3kb)  | ENSG00000225413 | -2010 |
| chr22 | 23995453 | 23995812 | 360 | Promoter (<=1kb)  | ENSG00000228315 | -380  |
| chr22 | 24026926 | 24027285 | 360 | Promoter (1-2kb)  | ENSG00000273000 | 1816  |
| chr22 | 24197505 | 24197900 | 396 | Promoter (1-2kb)  | ENSG00000272973 | 1326  |
| chr22 | 24197758 | 24198153 | 396 | Promoter (1-2kb)  | ENSG00000272973 | 1073  |
| chr22 | 24314010 | 24314369 | 360 | Promoter (2-3kb)  | ENSG00000272787 | 2610  |
| chr22 | 24500080 | 24500475 | 396 | Promoter (2-3kb)  | ENSG00000232545 | 2428  |
| chr22 | 24890712 | 24891107 | 396 | Promoter (<=1kb)  | ENSG00000178803 | 0     |
| chr22 | 24894469 | 24894828 | 360 | Distal Intergenic | ENSG00000178803 | -3427 |
| chr22 | 24894495 | 24894890 | 396 | Distal Intergenic | ENSG00000178803 | -3453 |
| chr22 | 24894703 | 24895098 | 396 | Distal Intergenic | ENSG00000178803 | -3661 |
| chr22 | 24912052 | 24912447 | 396 | Promoter (<=1kb)  | ENSG00000228923 | -29   |
| chr22 | 24988781 | 24989140 | 360 | Distal Intergenic | ENSG00000230947 | -4881 |
| chr22 | 25512102 | 25512461 | 360 | Distal Intergenic | ENSG00000203280 | -3443 |
| chr22 | 25979638 | 25979997 | 360 | Promoter (2-3kb)  | ENSG00000237387 | -2289 |
| chr22 | 26557031 | 26557426 | 396 | Promoter (<=1kb)  | ENSG00000236464 | -374  |
| chr22 | 26650550 | 26650909 | 360 | Promoter (<=1kb)  | ENSG00000224192 | -492  |
| chr22 | 26923178 | 26923573 | 396 | Promoter (2-3kb)  | ENSG00000260065 | -2176 |
| chr22 | 27055637 | 27055996 | 360 | Promoter (2-3kb)  | ENSG00000225783 | 2059  |
| chr22 | 27670568 | 27670963 | 396 | Promoter (1-2kb)  | ENSG00000233574 | -1238 |
| chr22 | 27670864 | 27671259 | 396 | Promoter (<=1kb)  | ENSG00000233574 | -942  |
| chr22 | 28316011 | 28316370 | 360 | Promoter (<=1kb)  | ENSG00000235954 | 505   |
| chr22 | 28316063 | 28316324 | 262 | Promoter (<=1kb)  | ENSG00000235954 | 557   |
| chr22 | 28396179 | 28396574 | 396 | Promoter (2-3kb)  | ENSG00000235954 | 2614  |
| chr22 | 29195472 | 29195831 | 360 | Promoter (<=1kb)  | ENSG00000226471 | -840  |
| chr22 | 29388312 | 29388671 | 360 | Promoter (<=1kb)  | ENSG00000235786 | -38   |
| chr22 | 29388313 | 29388708 | 396 | Promoter (<=1kb)  | ENSG00000235786 | -1    |
| chr22 | 29388561 | 29388956 | 396 | Promoter (<=1kb)  | ENSG00000235786 | 0     |
| chr22 | 29716713 | 29717108 | 396 | Distal Intergenic | ENSG00000273216 | -3504 |
| chr22 | 29838096 | 29838491 | 396 | Promoter (<=1kb)  | ENSG00000225465 | -269  |
| chr22 | 29838330 | 29838725 | 396 | Promoter (<=1kb)  | ENSG00000225465 | -503  |
| chr22 | 30605827 | 30606222 | 396 | Promoter (2-3kb)  | ENSG00000225676 | -2729 |
| chr22 | 30634626 | 30635021 | 396 | Promoter (<=1kb)  | ENSG00000232530 | -162  |
| chr22 | 30634886 | 30635281 | 396 | Promoter (<=1kb)  | ENSG00000232530 | 0     |
| chr22 | 30881101 | 30881496 | 396 | Promoter (1-2kb)  | ENSG00000181123 | 1760  |
| chr22 | 31363822 | 31364217 | 396 | Promoter (2-3kb)  | ENSG00000253352 | -2446 |
| chr22 | 31476388 | 31476783 | 396 | Promoter (2-3kb)  | ENSG00000273387 | 2768  |
| chr22 | 31480402 | 31480797 | 396 | Promoter (<=1kb)  | ENSG00000273387 | -851  |
| chr22 | 31482985 | 31483344 | 360 | Distal Intergenic | ENSG00000273387 | -3434 |
| chr22 | 31685671 | 31686030 | 360 | Promoter (2-3kb)  | ENSG00000228839 | -2455 |

|       |          |          |     |                     |                 |       |
|-------|----------|----------|-----|---------------------|-----------------|-------|
| chr22 | 31733832 | 31734191 | 360 | Promoter (2-3kb)    | ENSG00000228839 | 2497  |
| chr22 | 32532034 | 32532429 | 396 | Distal Intergenic   | ENSG00000239674 | -4825 |
| chr22 | 32532137 | 32532496 | 360 | Distal Intergenic   | ENSG00000239674 | -4758 |
| chr22 | 32532658 | 32533053 | 396 | Distal Intergenic   | ENSG00000239674 | -4201 |
| chr22 | 32533820 | 32534215 | 396 | Distal Intergenic   | ENSG00000239674 | -3039 |
| chr22 | 32535004 | 32535399 | 396 | Promoter (1-2kb)    | ENSG00000239674 | -1855 |
| chr22 | 32537462 | 32537821 | 360 | Promoter (<=1kb)    | ENSG00000239674 | 208   |
| chr22 | 32669721 | 32670116 | 396 | Promoter (<=1kb)    | ENSG00000224050 | 314   |
| chr22 | 32669951 | 32670346 | 396 | Promoter (<=1kb)    | ENSG00000224050 | 544   |
| chr22 | 32675850 | 32676209 | 360 | Distal Intergenic   | ENSG00000273325 | -4461 |
| chr22 | 32780415 | 32780774 | 360 | Promoter (<=1kb)    | ENSG00000241954 | 642   |
| chr22 | 33555527 | 33555886 | 360 | Distal Intergenic   | ENSG00000232073 | -4163 |
| chr22 | 35397477 | 35397872 | 396 | Promoter (<=1kb)    | ENSG00000227895 | 980   |
| chr22 | 35397784 | 35398179 | 396 | Promoter (<=1kb)    | ENSG00000227895 | 673   |
| chr22 | 35399715 | 35400110 | 396 | Promoter (<=1kb)    | ENSG00000227895 | -863  |
| chr22 | 35400212 | 35400607 | 396 | Promoter (1-2kb)    | ENSG00000227895 | -1360 |
| chr22 | 35627072 | 35627467 | 396 | Promoter (<=1kb)    | ENSG00000233080 | -23   |
| chr22 | 35627298 | 35627693 | 396 | Promoter (<=1kb)    | ENSG00000233080 | -249  |
| chr22 | 35922069 | 35922464 | 396 | Promoter (<=1kb)    | ENSG00000273044 | -515  |
| chr22 | 37212580 | 37212975 | 396 | Promoter (<=1kb)    | ENSG00000234979 | 210   |
| chr22 | 37559736 | 37560131 | 396 | Promoter (2-3kb)    | ENSG00000235237 | -2666 |
| chr22 | 37560574 | 37560969 | 396 | Promoter (1-2kb)    | ENSG00000235237 | -1828 |
| chr22 | 37561579 | 37561974 | 396 | Promoter (<=1kb)    | ENSG00000235237 | -823  |
| chr22 | 37561653 | 37562012 | 360 | Promoter (<=1kb)    | ENSG00000235237 | -785  |
| chr22 | 37561901 | 37562260 | 360 | Promoter (<=1kb)    | ENSG00000235237 | -537  |
| chr22 | 37563229 | 37563624 | 396 | Promoter (<=1kb)    | ENSG00000235237 | 432   |
| chr22 | 37563739 | 37564134 | 396 | Promoter (<=1kb)    | ENSG00000235237 | 942   |
| chr22 | 37563977 | 37564372 | 396 | Promoter (1-2kb)    | ENSG00000235237 | 1180  |
| chr22 | 37755655 | 37756014 | 360 | Intron (ENST000004) | ENSG00000237862 | -4776 |
| chr22 | 37778401 | 37778760 | 360 | Promoter (2-3kb)    | ENSG00000243902 | 2563  |
| chr22 | 37783151 | 37783510 | 360 | Promoter (1-2kb)    | ENSG00000243902 | -1828 |
| chr22 | 37943962 | 37944321 | 360 | Promoter (1-2kb)    | ENSG00000225867 | -1712 |
| chr22 | 38051173 | 38051532 | 360 | Promoter (2-3kb)    | ENSG00000233360 | 2852  |
| chr22 | 38052276 | 38052671 | 396 | Promoter (1-2kb)    | ENSG00000233360 | 1713  |
| chr22 | 38054173 | 38054532 | 360 | Promoter (<=1kb)    | ENSG00000233360 | 0     |
| chr22 | 38057070 | 38057465 | 396 | Promoter (2-3kb)    | ENSG00000233360 | -2686 |
| chr22 | 38057253 | 38057612 | 360 | Promoter (2-3kb)    | ENSG00000233360 | -2869 |
| chr22 | 38057327 | 38057722 | 396 | Promoter (2-3kb)    | ENSG00000233360 | -2943 |
| chr22 | 38467134 | 38467493 | 360 | Promoter (2-3kb)    | ENSG00000233739 | 2454  |
| chr22 | 38481897 | 38482292 | 396 | Distal Intergenic   | ENSG00000272720 | -3842 |
| chr22 | 38482699 | 38483058 | 360 | Distal Intergenic   | ENSG00000272720 | -3076 |
| chr22 | 39139035 | 39139394 | 360 | Promoter (<=1kb)    | ENSG00000273076 | -106  |
| chr22 | 39319398 | 39319793 | 396 | Promoter (2-3kb)    | ENSG00000235209 | 2166  |
| chr22 | 39319512 | 39319871 | 360 | Promoter (2-3kb)    | ENSG00000235209 | 2280  |
| chr22 | 39319634 | 39320029 | 396 | Promoter (2-3kb)    | ENSG00000235209 | 2402  |
| chr22 | 39319711 | 39320070 | 360 | Promoter (2-3kb)    | ENSG00000235209 | 2479  |
| chr22 | 39319898 | 39320293 | 396 | Promoter (2-3kb)    | ENSG00000235209 | 2666  |
| chr22 | 41576824 | 41577219 | 396 | Promoter (1-2kb)    | ENSG00000232754 | 1929  |
| chr22 | 41577095 | 41577490 | 396 | Promoter (1-2kb)    | ENSG00000232754 | 1658  |
| chr22 | 41597023 | 41597382 | 360 | Distal Intergenic   | ENSG00000231993 | -3563 |
| chr22 | 41597175 | 41597570 | 396 | Distal Intergenic   | ENSG00000231993 | -3715 |
| chr22 | 41822733 | 41823128 | 396 | Distal Intergenic   | ENSG00000273424 | -3810 |
| chr22 | 41828682 | 41829041 | 360 | Promoter (1-2kb)    | ENSG00000273424 | 1744  |
| chr22 | 42233337 | 42233732 | 396 | Promoter (2-3kb)    | ENSG00000184068 | -2668 |
| chr22 | 42511173 | 42511568 | 396 | Promoter (2-3kb)    | ENSG00000237037 | -2692 |
| chr22 | 42519364 | 42519759 | 396 | Promoter (<=1kb)    | ENSG00000237037 | 0     |
| chr22 | 42519384 | 42519743 | 360 | Promoter (<=1kb)    | ENSG00000237037 | 0     |
| chr22 | 42520557 | 42520916 | 360 | Promoter (<=1kb)    | ENSG00000237037 | 818   |

|       |          |          |     |                   |                 |       |
|-------|----------|----------|-----|-------------------|-----------------|-------|
| chr22 | 42520803 | 42521198 | 396 | Promoter (1-2kb)  | ENSG00000237037 | 1064  |
| chr22 | 42520822 | 42521181 | 360 | Promoter (1-2kb)  | ENSG00000237037 | 1083  |
| chr22 | 42662737 | 42663132 | 396 | Promoter (2-3kb)  | ENSG00000182057 | -2627 |
| chr22 | 42675364 | 42675723 | 360 | Promoter (1-2kb)  | ENSG00000273366 | 1170  |
| chr22 | 42763076 | 42763471 | 396 | Promoter (1-2kb)  | ENSG00000229891 | 1703  |
| chr22 | 42768412 | 42768771 | 360 | Distal Intergenic | ENSG00000229891 | -3170 |
| chr22 | 44968229 | 44968588 | 360 | Promoter (2-3kb)  | ENSG00000187012 | 2298  |
| chr22 | 45398168 | 45398527 | 360 | Promoter (<=1kb)  | ENSG00000230922 | 973   |
| chr22 | 45553706 | 45554101 | 396 | Promoter (1-2kb)  | ENSG00000273243 | -1814 |
| chr22 | 45571284 | 45571679 | 396 | Distal Intergenic | ENSG00000273353 | -3192 |
| chr22 | 45656169 | 45656564 | 396 | Promoter (2-3kb)  | ENSG00000273287 | 2902  |
| chr22 | 46006420 | 46006779 | 360 | Distal Intergenic | ENSG00000238120 | -4919 |
| chr22 | 46284080 | 46284475 | 396 | Promoter (<=1kb)  | ENSG00000235091 | -452  |
| chr22 | 46284348 | 46284743 | 396 | Promoter (<=1kb)  | ENSG00000235091 | -720  |
| chr22 | 46443967 | 46444362 | 396 | Distal Intergenic | ENSG00000231711 | -3234 |
| chr22 | 46444174 | 46444569 | 396 | Distal Intergenic | ENSG00000231711 | -3441 |
| chr22 | 46452964 | 46453323 | 360 | Promoter (<=1kb)  | ENSG00000231010 | 717   |
| chr22 | 46453218 | 46453613 | 396 | Promoter (<=1kb)  | ENSG00000231010 | 427   |
| chr22 | 46453422 | 46453817 | 396 | Promoter (<=1kb)  | ENSG00000231010 | 223   |
| chr22 | 46453683 | 46454042 | 360 | Promoter (<=1kb)  | ENSG00000231010 | 0     |
| chr22 | 46455086 | 46455481 | 396 | Promoter (1-2kb)  | ENSG00000231010 | -1046 |
| chr22 | 46469080 | 46469439 | 360 | Distal Intergenic | ENSG00000235159 | -3309 |
| chr22 | 46935556 | 46935915 | 360 | Promoter (1-2kb)  | ENSG00000234869 | -1477 |
| chr22 | 46935965 | 46936360 | 396 | Promoter (1-2kb)  | ENSG00000234869 | -1032 |
| chr22 | 46936219 | 46936614 | 396 | Promoter (<=1kb)  | ENSG00000234869 | -778  |
| chr22 | 48254432 | 48254827 | 396 | Promoter (1-2kb)  | ENSG00000230345 | -1593 |
| chr22 | 49941291 | 49941686 | 396 | Promoter (<=1kb)  | ENSG00000212939 | -643  |
| chr22 | 49941978 | 49942373 | 396 | Promoter (<=1kb)  | ENSG00000212939 | 0     |
| chr22 | 49942195 | 49942554 | 360 | Promoter (<=1kb)  | ENSG00000212939 | 0     |
| chr22 | 49943172 | 49943567 | 396 | Promoter (<=1kb)  | ENSG00000212939 | 843   |
| chr22 | 49943382 | 49943777 | 396 | Promoter (1-2kb)  | ENSG00000212939 | 1053  |
| chr22 | 49944392 | 49944751 | 360 | Promoter (2-3kb)  | ENSG00000212939 | 2063  |
| chr22 | 49967108 | 49967467 | 360 | Promoter (1-2kb)  | ENSG00000213279 | 1607  |
| chr22 | 49970862 | 49971257 | 396 | Promoter (1-2kb)  | ENSG00000213279 | -1788 |
| chr22 | 50291816 | 50292175 | 360 | Distal Intergenic | ENSG00000273192 | -3701 |
| chr22 | 50292015 | 50292374 | 360 | Distal Intergenic | ENSG00000273192 | -3502 |
| chr22 | 50293545 | 50293940 | 396 | Promoter (1-2kb)  | ENSG00000273192 | -1936 |
| chr22 | 50293623 | 50293982 | 360 | Promoter (1-2kb)  | ENSG00000273192 | -1894 |
| chr22 | 50293806 | 50294201 | 396 | Promoter (1-2kb)  | ENSG00000273192 | -1675 |
| chr22 | 50293824 | 50294183 | 360 | Promoter (1-2kb)  | ENSG00000273192 | -1693 |
| chr22 | 50627680 | 50628039 | 360 | Promoter (2-3kb)  | ENSG00000273188 | 2792  |
| chr22 | 50633627 | 50633986 | 360 | Promoter (2-3kb)  | ENSG00000273188 | -2796 |
| chr22 | 50639541 | 50639936 | 396 | Promoter (<=1kb)  | ENSG00000273253 | -565  |
| chr22 | 50641447 | 50641806 | 360 | Promoter (2-3kb)  | ENSG00000273253 | -2471 |
| chr22 | 50641888 | 50642283 | 396 | Promoter (2-3kb)  | ENSG00000272836 | 2208  |
| chr22 | 50642020 | 50642379 | 360 | Promoter (2-3kb)  | ENSG00000272836 | 2112  |
| chr22 | 50642096 | 50642491 | 396 | Promoter (1-2kb)  | ENSG00000272836 | 2000  |
| chrX  | 276510   | 276869   | 360 | Distal Intergenic | ENSG00000226179 | -4856 |
| chrX  | 276735   | 277130   | 396 | Distal Intergenic | ENSG00000226179 | -4595 |
| chrX  | 278966   | 279325   | 360 | Promoter (2-3kb)  | ENSG00000226179 | -2400 |
| chrX  | 283632   | 284027   | 396 | Promoter (1-2kb)  | ENSG00000226179 | 1907  |
| chrX  | 2538082  | 2538477  | 396 | Distal Intergenic | ENSG00000230542 | -4694 |
| chrX  | 2774918  | 2775277  | 360 | Distal Intergenic | ENSG00000235483 | -3117 |
| chrX  | 41374145 | 41374540 | 396 | Distal Intergenic | ENSG00000233033 | -4749 |
| chrX  | 41374431 | 41374826 | 396 | Distal Intergenic | ENSG00000233033 | -4463 |
| chrX  | 41381703 | 41382062 | 360 | Promoter (2-3kb)  | ENSG00000233033 | 2414  |
| chrX  | 47152389 | 47152784 | 396 | Distal Intergenic | ENSG00000203402 | -4467 |
| chrX  | 48597535 | 48597930 | 396 | Promoter (1-2kb)  | ENSG00000232828 | -1965 |



|      |          |          |     |                   |                 |       |
|------|----------|----------|-----|-------------------|-----------------|-------|
| chrX | 48597747 | 48598142 | 396 | Promoter (2-3kb)  | ENSG00000232828 | -2177 |
| chrX | 49053755 | 49054150 | 396 | Promoter (1-2kb)  | ENSG00000237341 | -1275 |
| chrX | 56995470 | 56995865 | 396 | Distal Intergenic | ENSG00000224799 | -4078 |
| chrX | 1.53E+08 | 1.53E+08 | 396 | Promoter (<=1kb)  | ENSG00000228616 | 933   |
| chrX | 1.53E+08 | 1.53E+08 | 360 | Promoter (<=1kb)  | ENSG00000232725 | -720  |
